# Supplementary material
Source: PubMed Central journal article supplement (PMC5712227)

### glycine

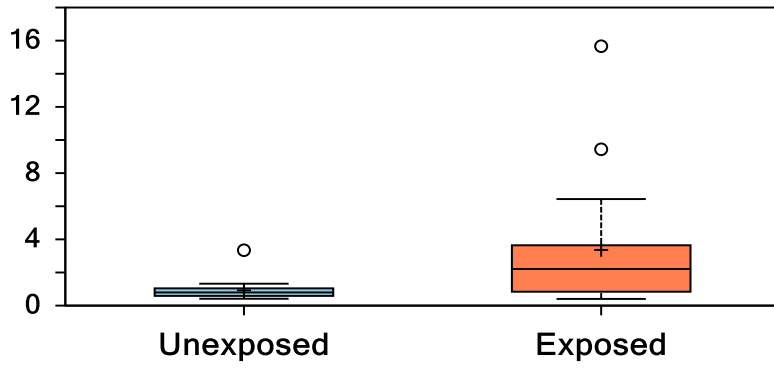

### N-acetylglycine

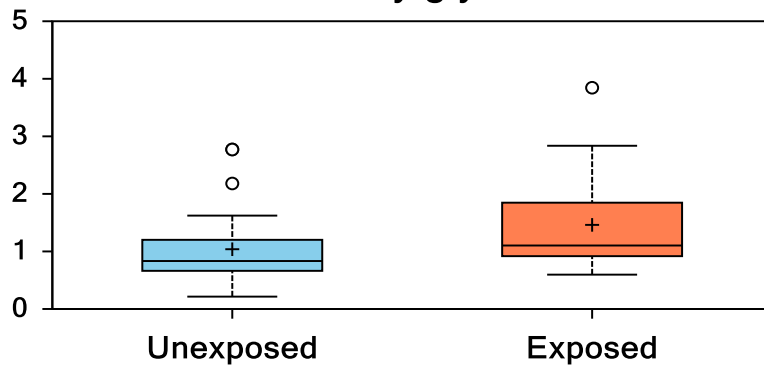

### N-acetylserine

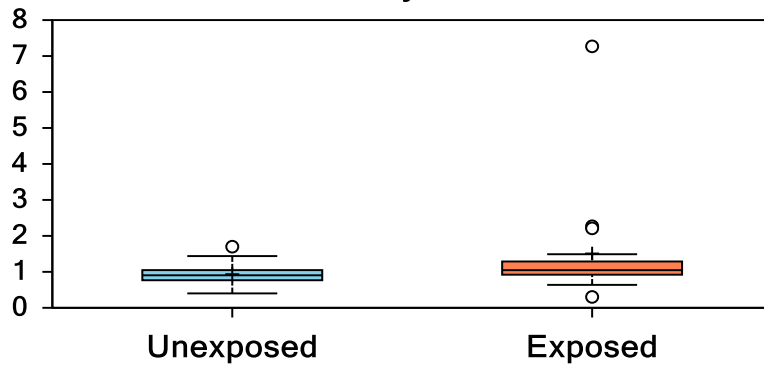

### N-acetylthreonine

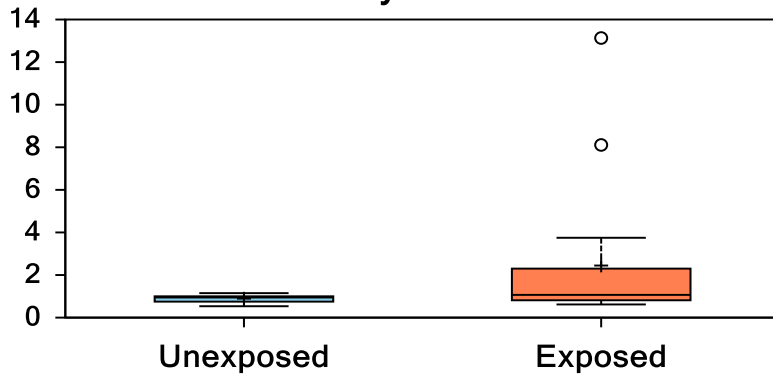

### asparagine

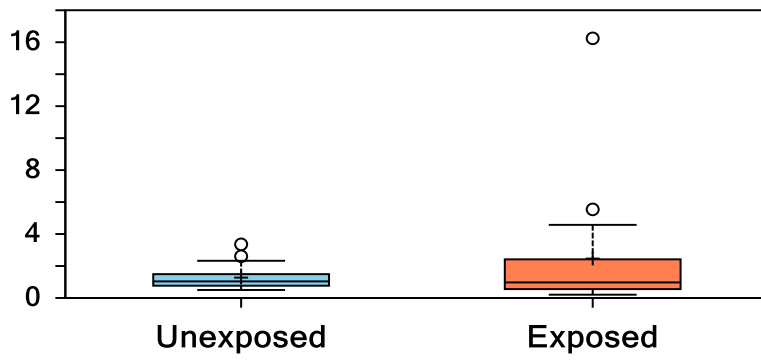

### 3-ureidopropionate

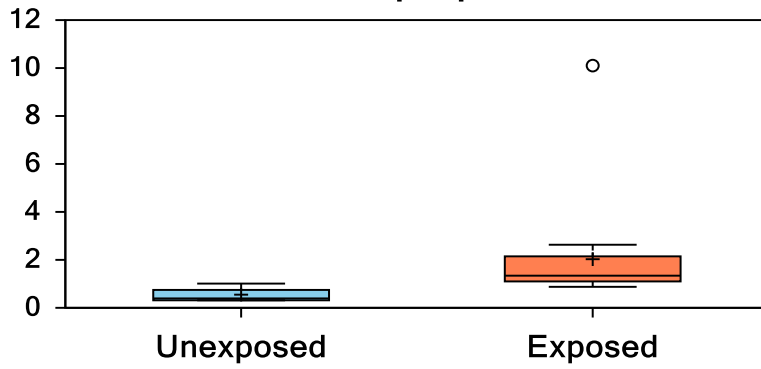

### N-acetylalanine

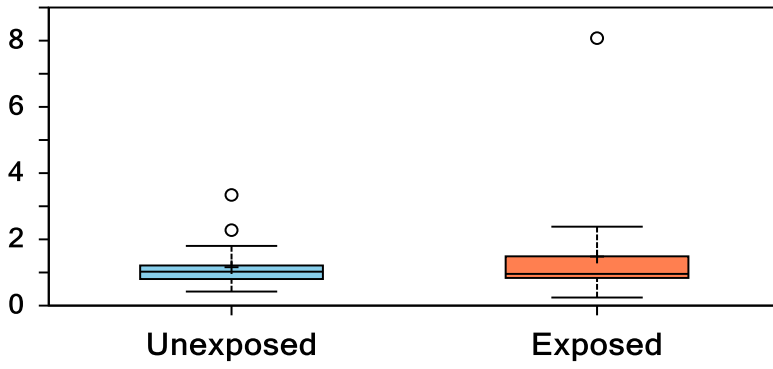

### 4-hydroxyglutamate

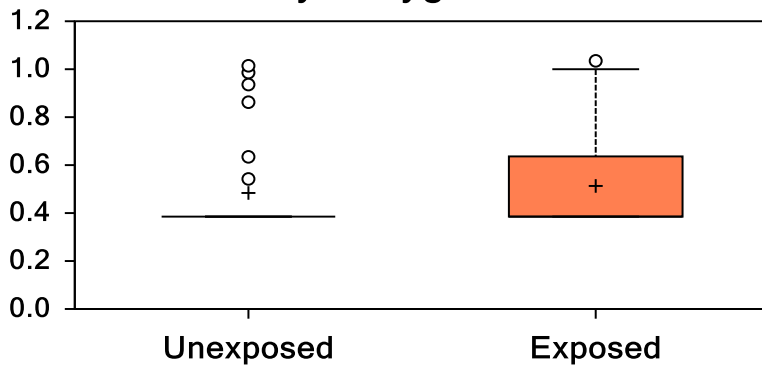

### gamma-aminobutyrate (GABA)

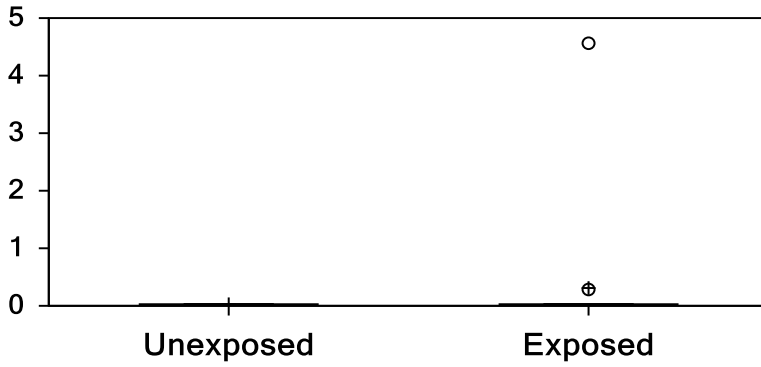

histidine

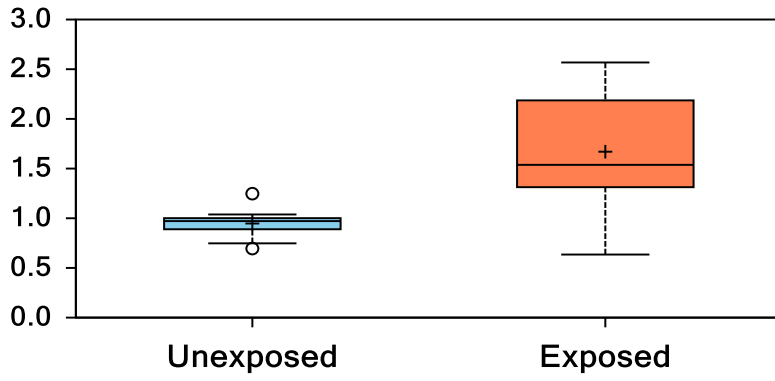

hydantoin-5-propionic acid

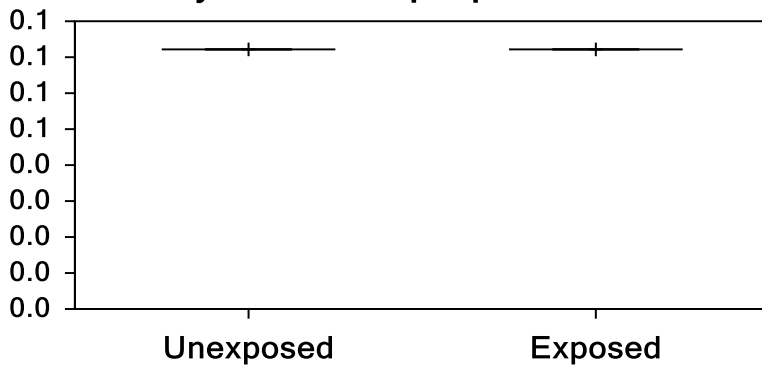

imidazole propionate

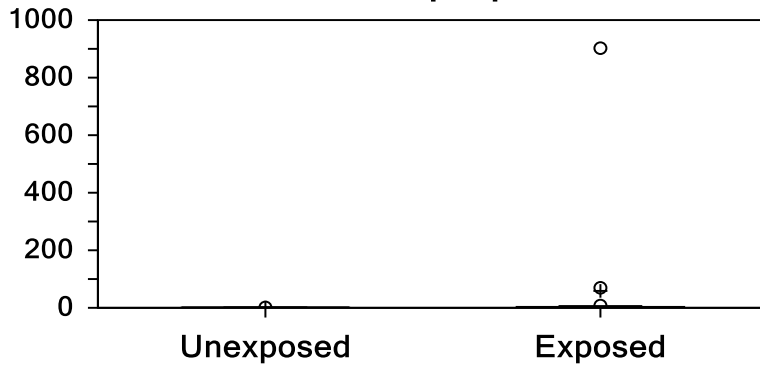



### 3-methylglutaconate

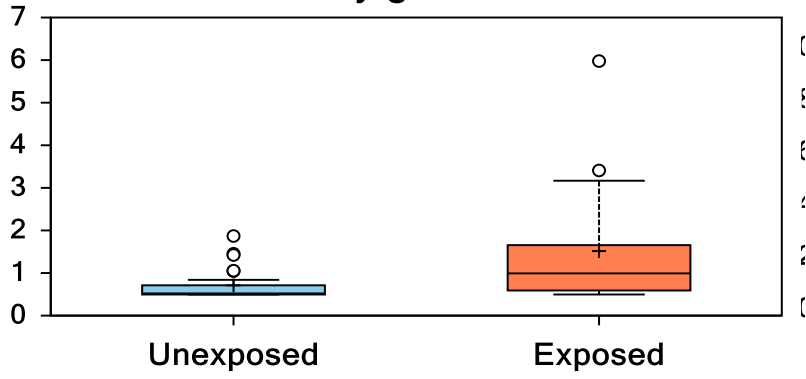

### 2-aminoadipate

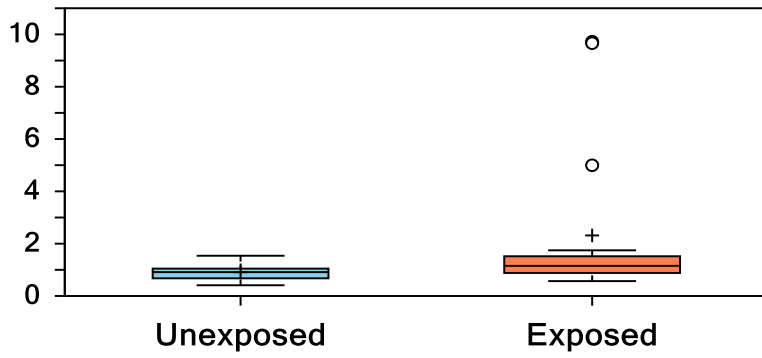

### N2-acetyllysine

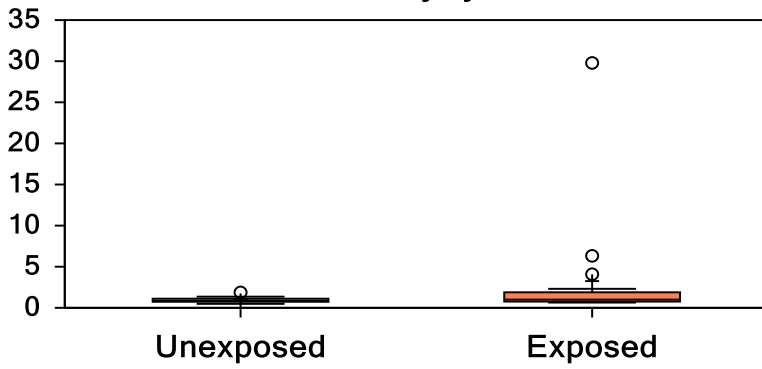

phenyllactate (PLA)

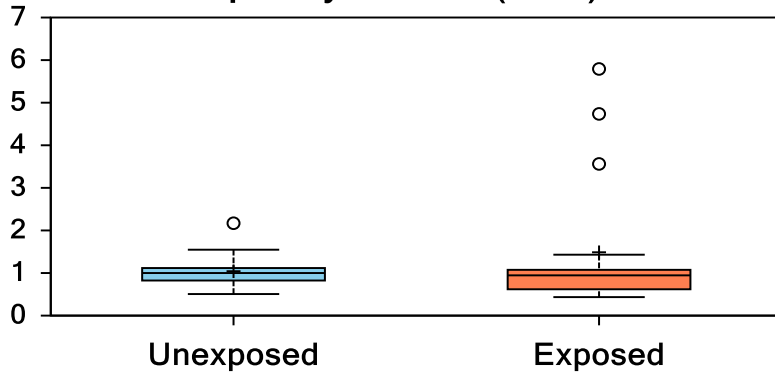

phenylacetate

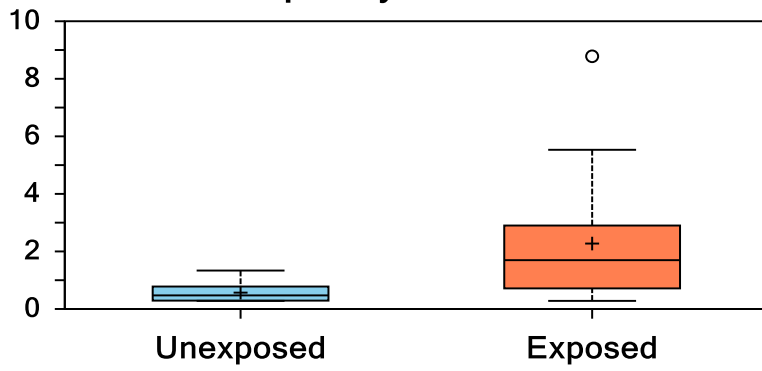

phenylpyruvate

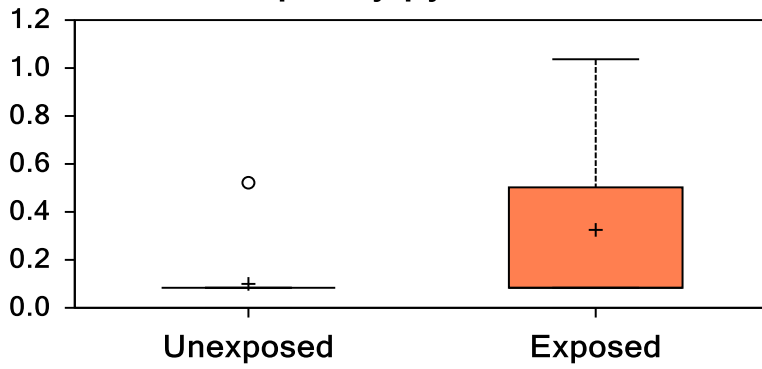

**3-(4-hydroxyphenyl)lactate**

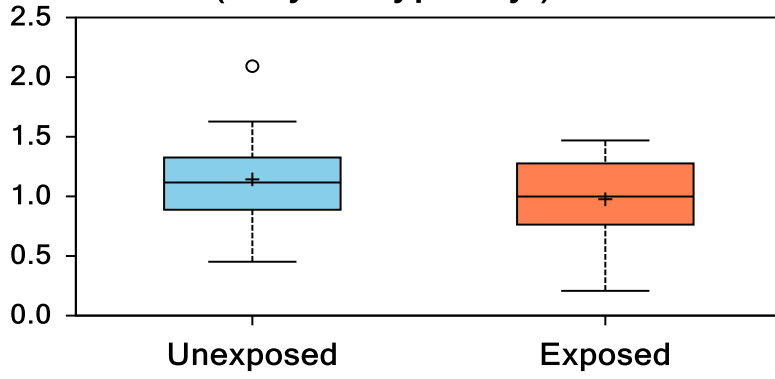

**4-hydroxyphenylpyruvate**

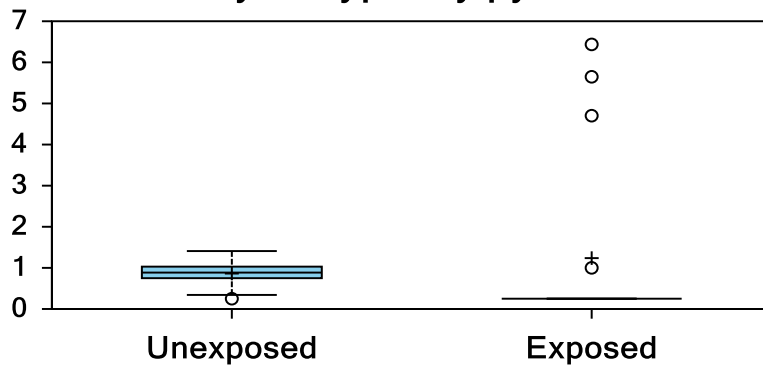

**3-methoxytyrosine**

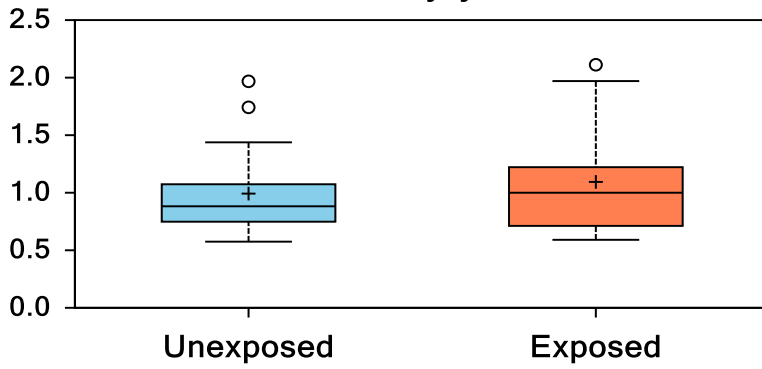

### 3-(3-hydroxyphenyl)propionate

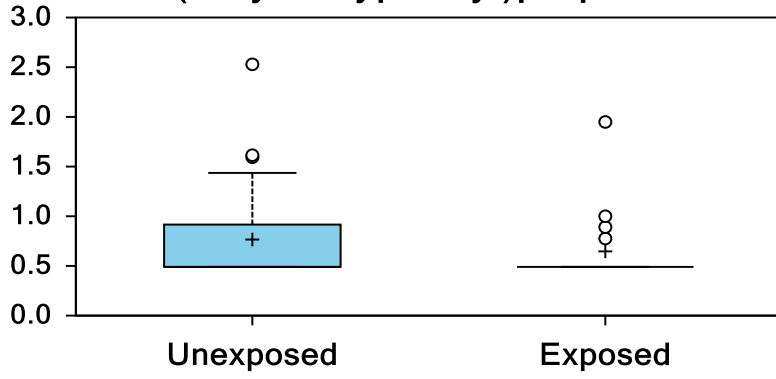

### xanthurenate

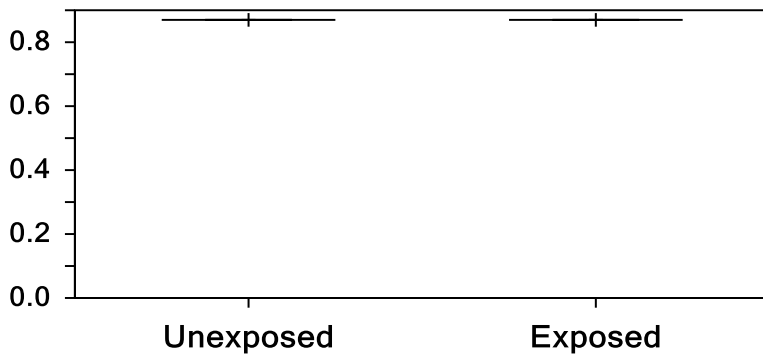

### tryptophan

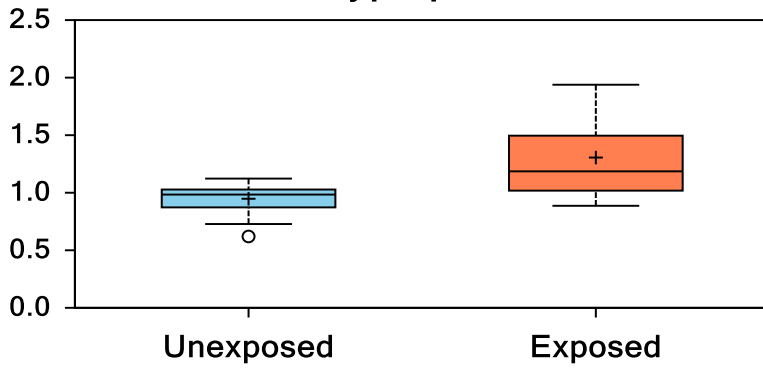

### indoleacetate

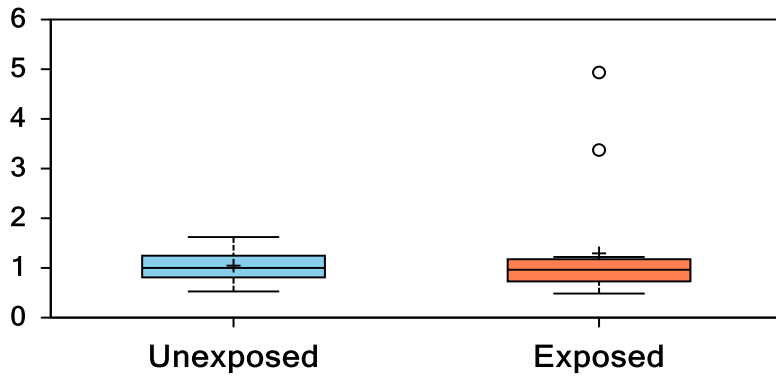

### anthranilate

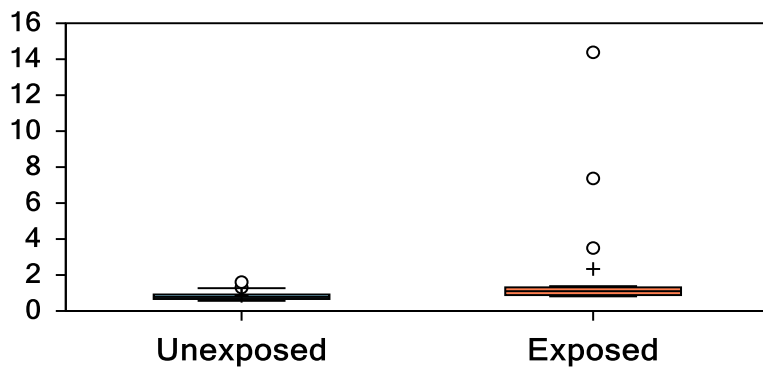

### serotonin (5HT)

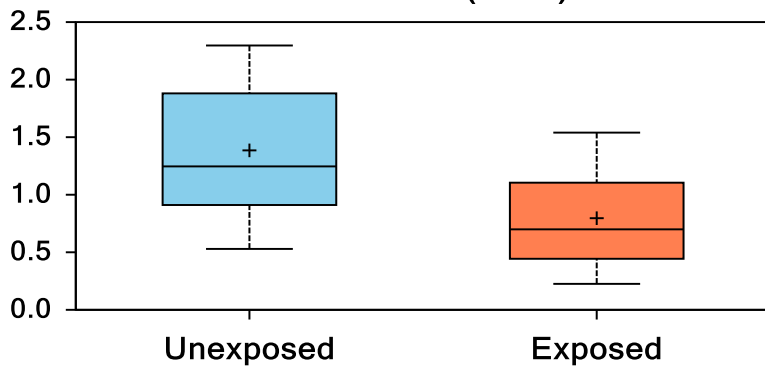

### 5-hydroxyindoleacetate

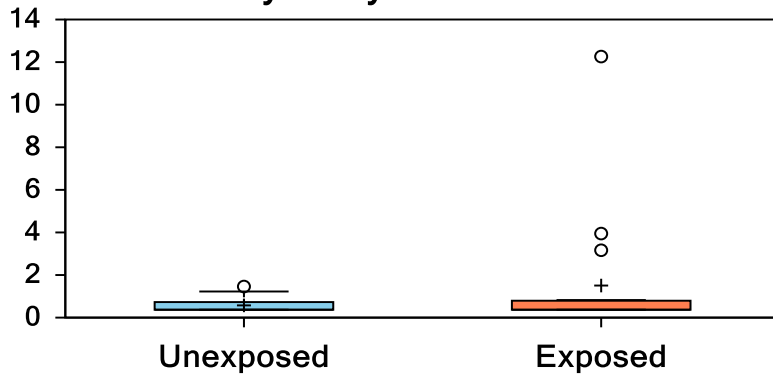

### 3-methyl-2-oxobutyrates

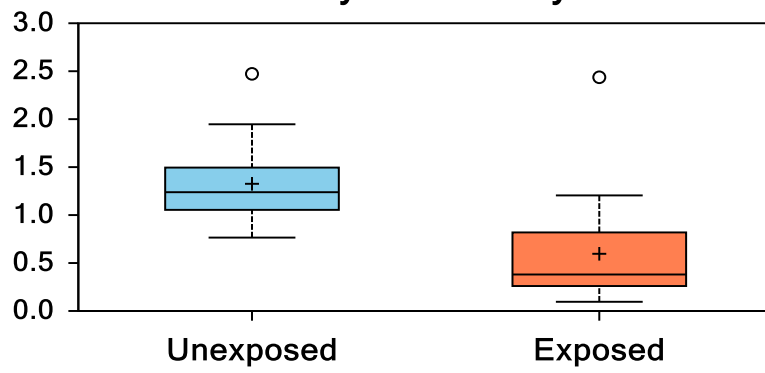

### beta-hydroxyisovalerate

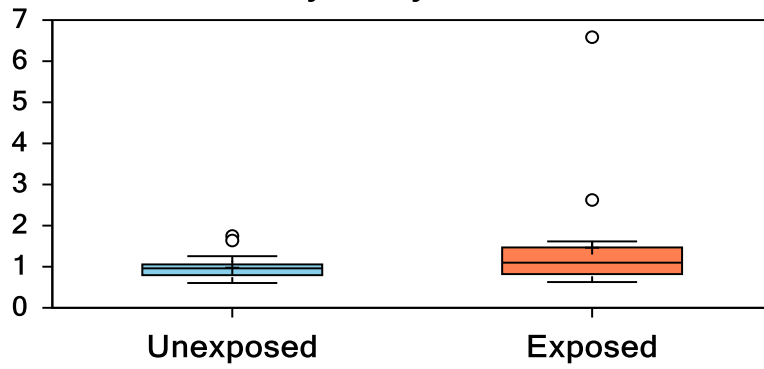

### leucine

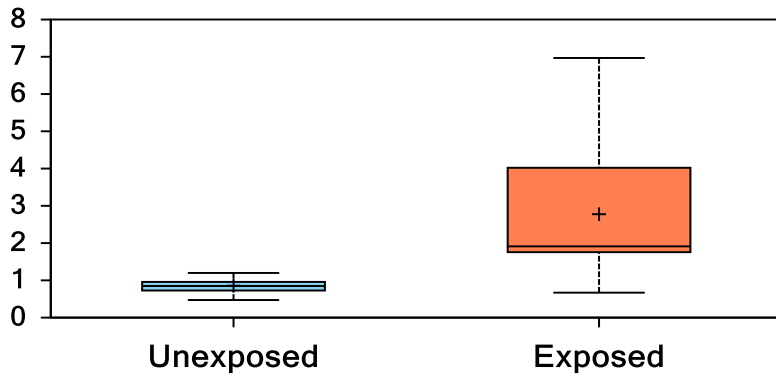

### N-acetylisooleucine

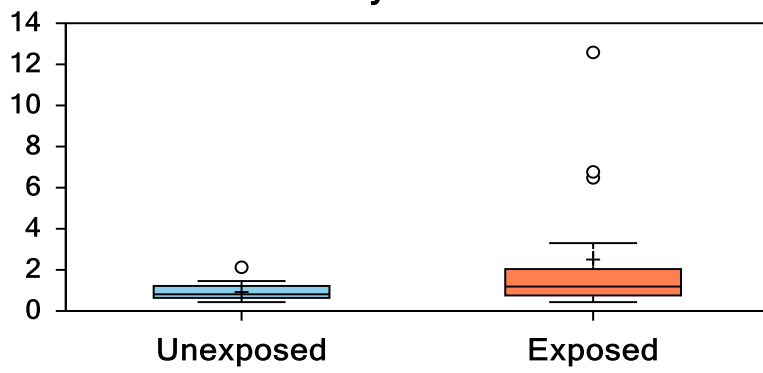

### 2-hydroxyisobutyrate

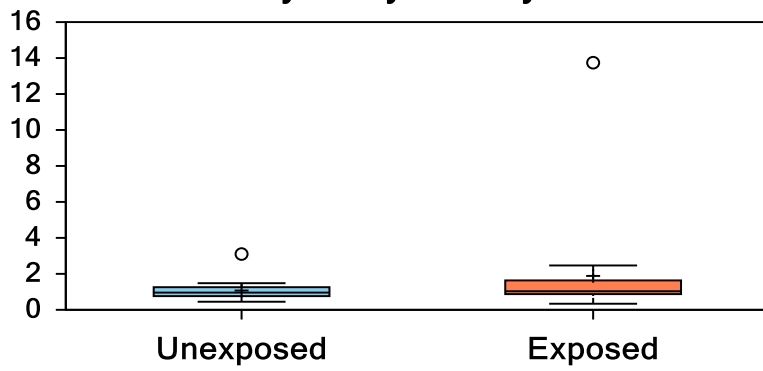

### 3-hydroxy-2-ethylpropionate

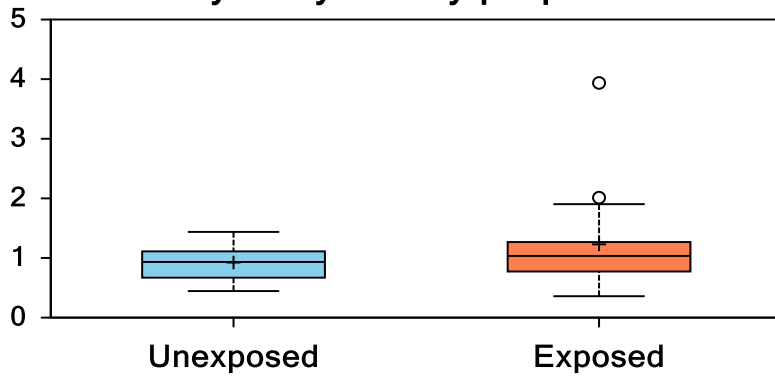

### isobutyrylcarnitine

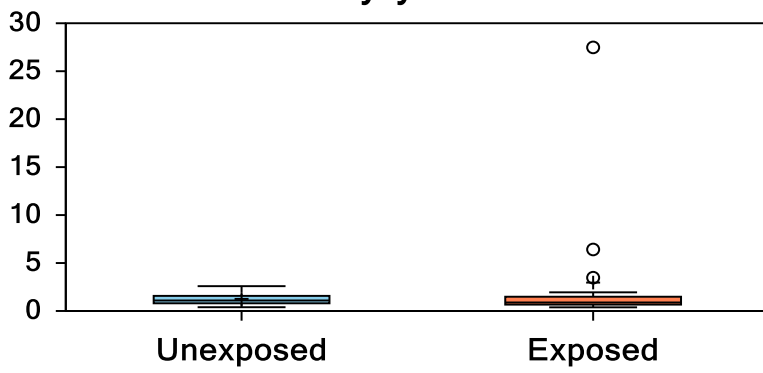

### isovalerylcarnitine

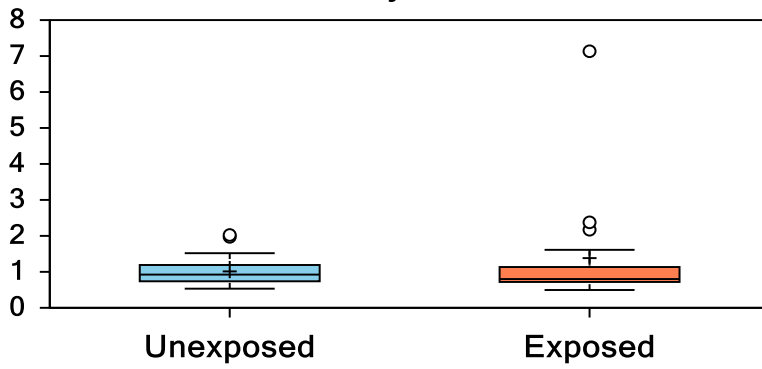



### methylglutaroylcarnitine

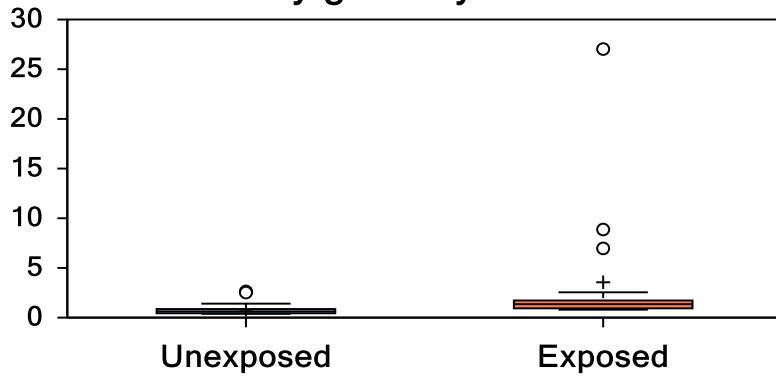

### S-methylcysteine

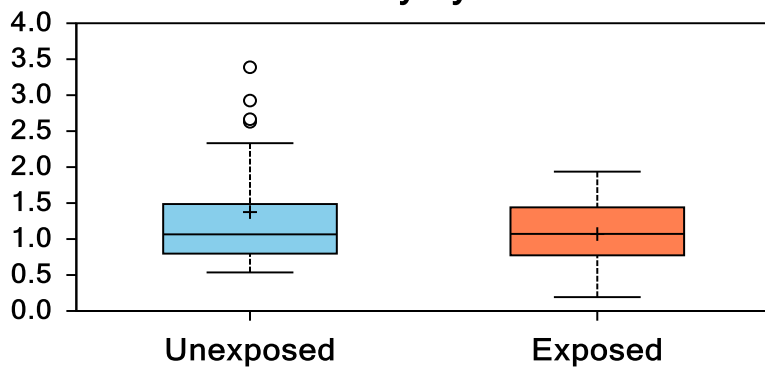

### N-formylmethionine

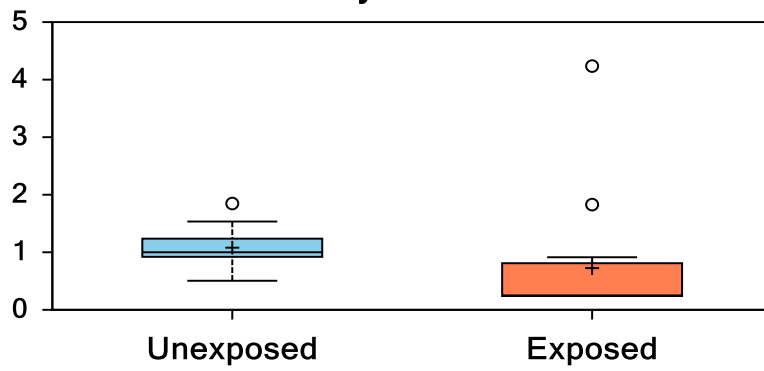

### alpha-ketobutyrate

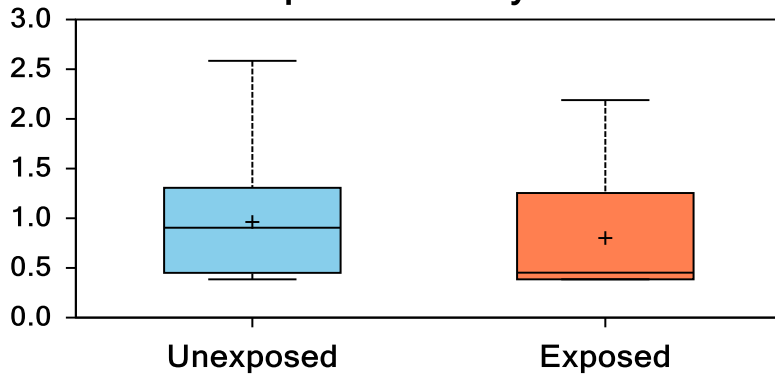

### homocystine

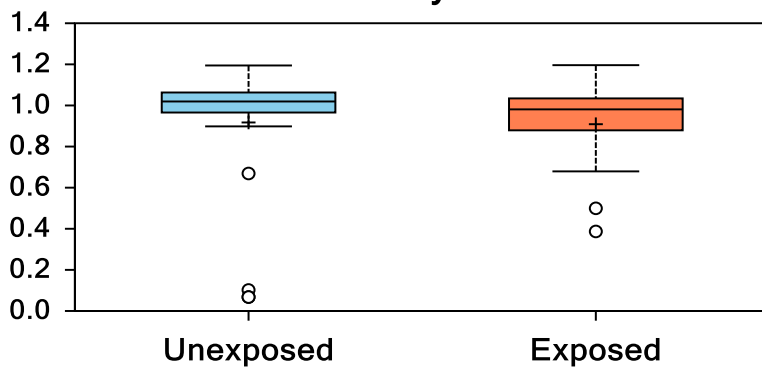

### dimethylarginine (SDMA + ADMA)

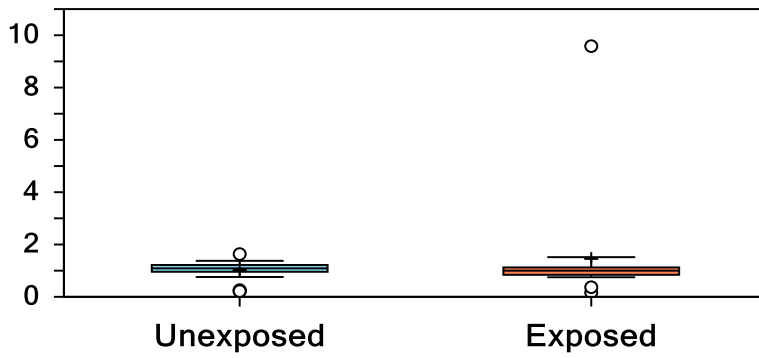

### urea

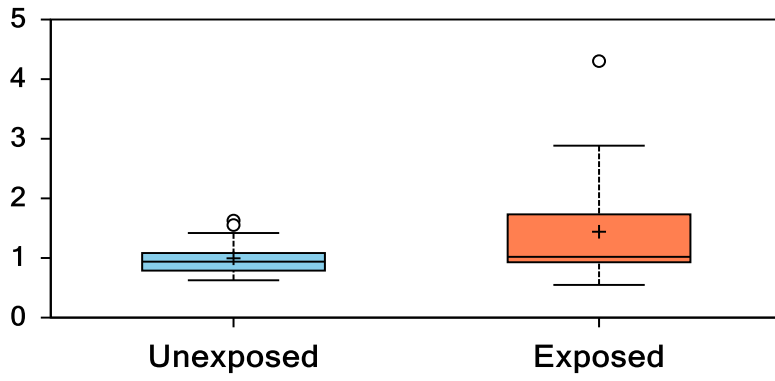

### citrulline

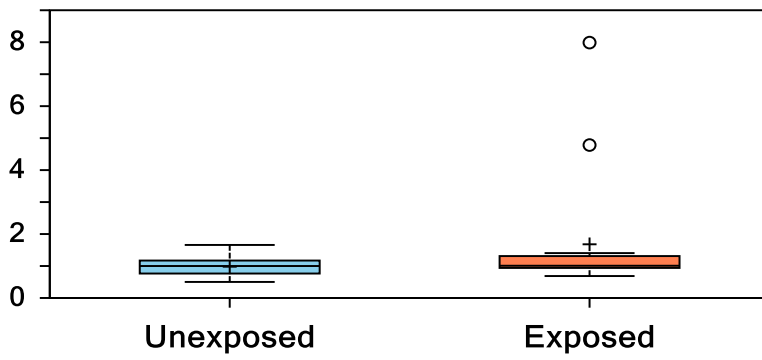

### trans-4-hydroxyproline

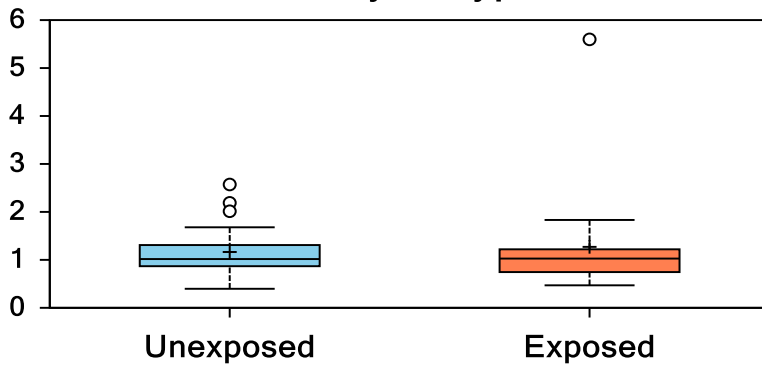

creatinine

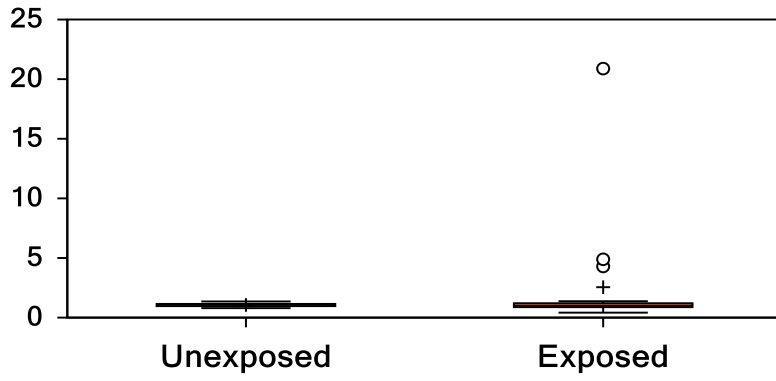

N-acetylputrescine

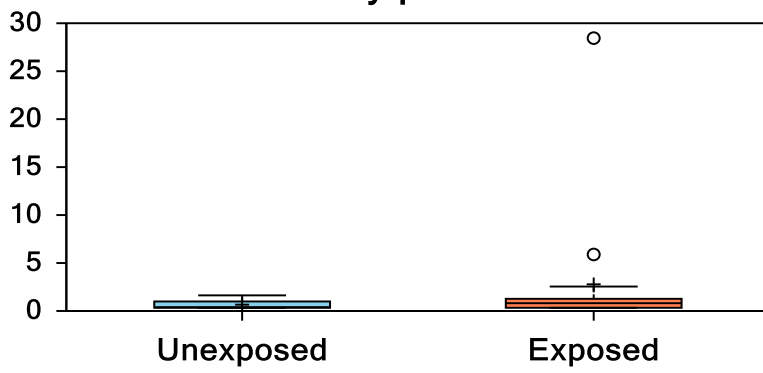

5-oxoproline

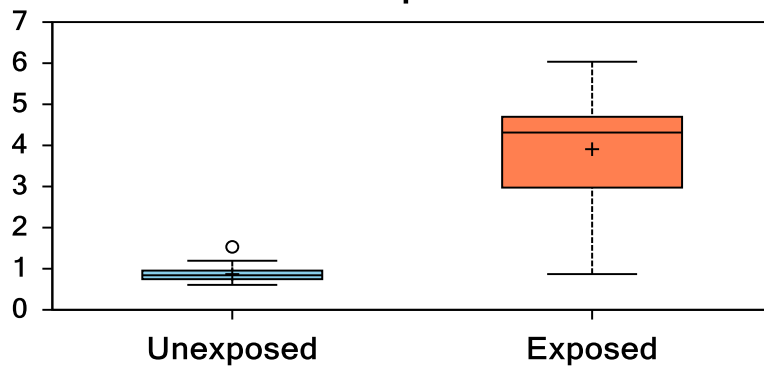

glycylproline

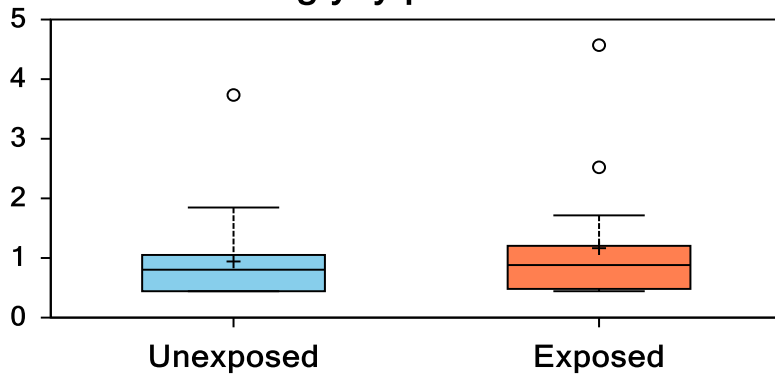

glycyltyrosine

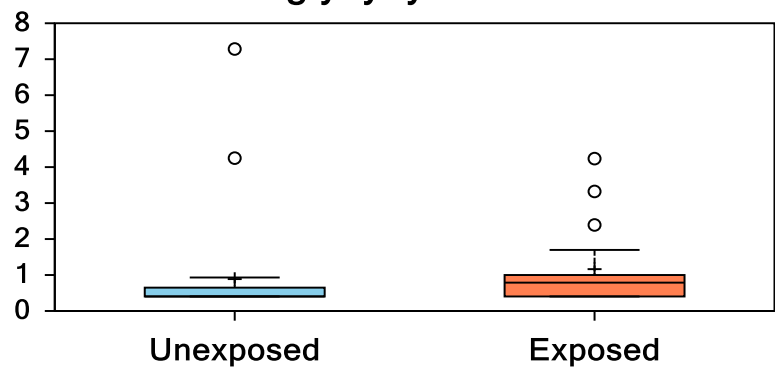

alanylleucine

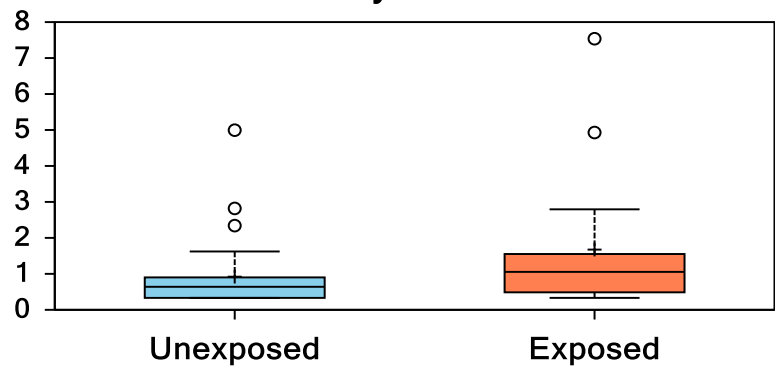

### alpha-glutamylglutamate

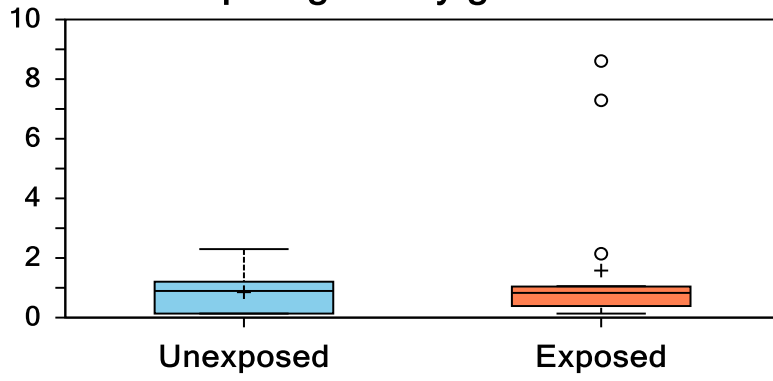

### isoleucylisoleucine

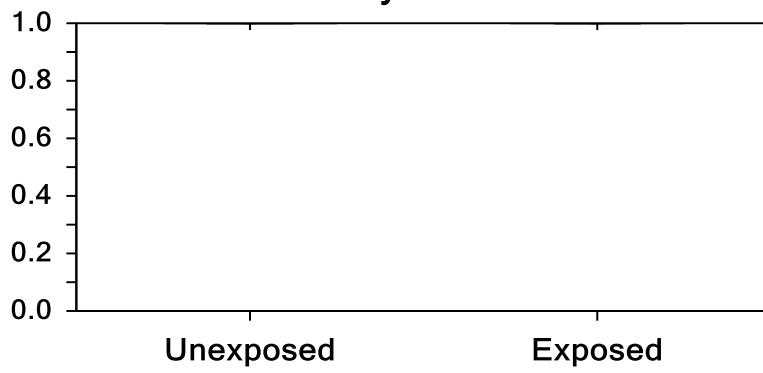

### leucylproline

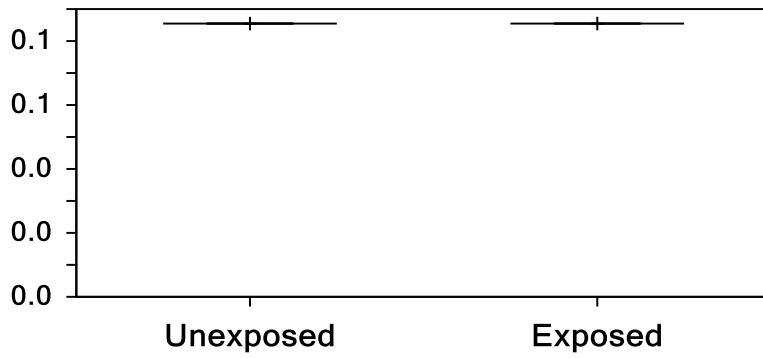

pro-hydroxy-pro

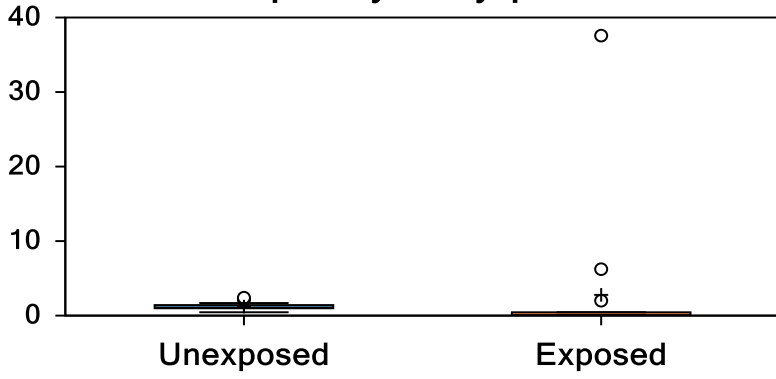

pyroglutamylglycine

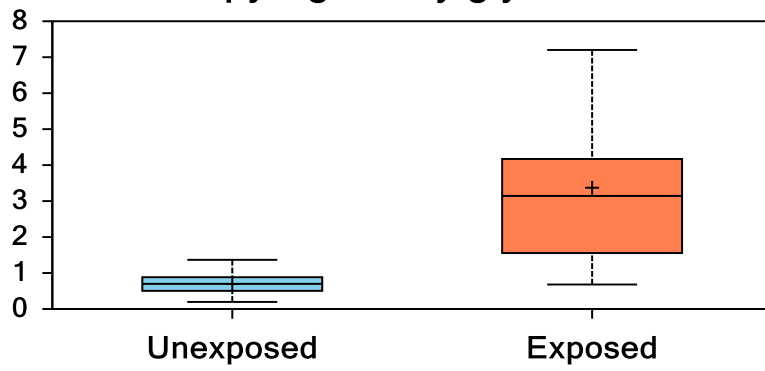

valylglutamate

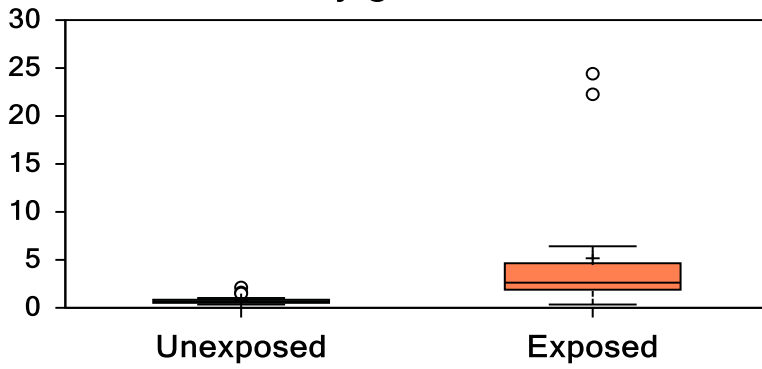

valyltyrosine

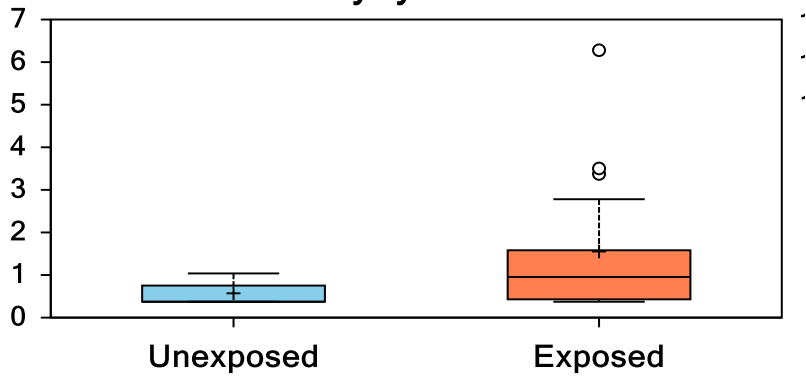

cyclo(phe-pro)

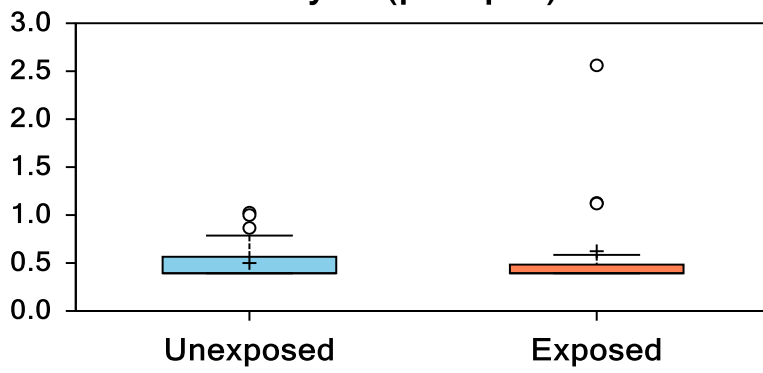

valylleucine

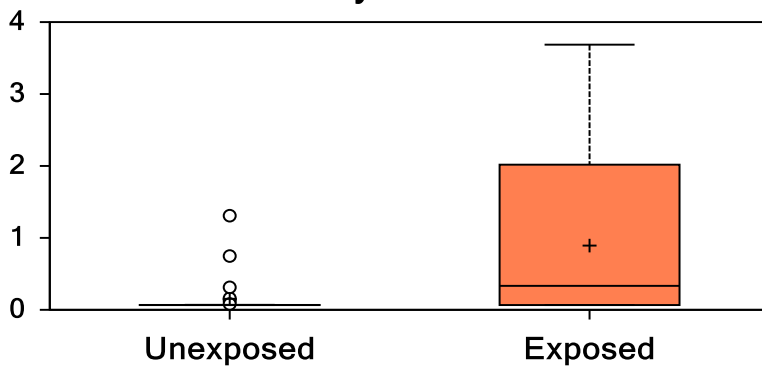



histidylleucine

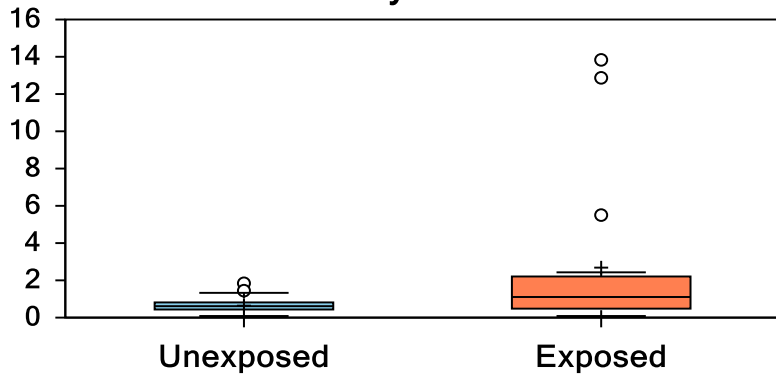

isoleucylalanine

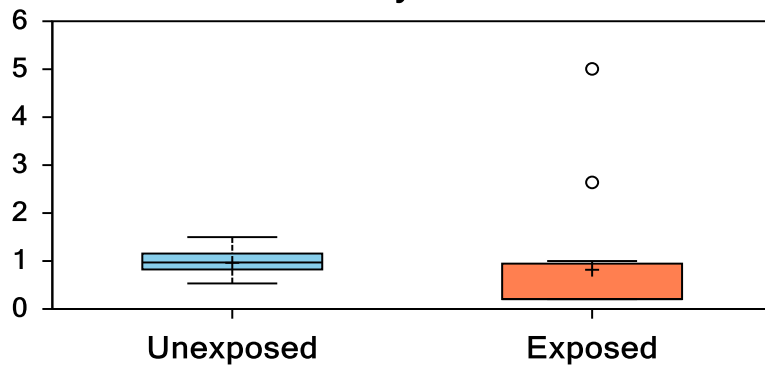

isoleucylglycine

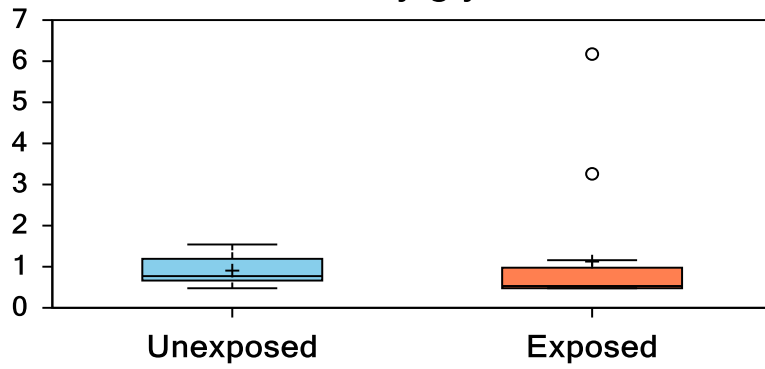

### isoleucylserine

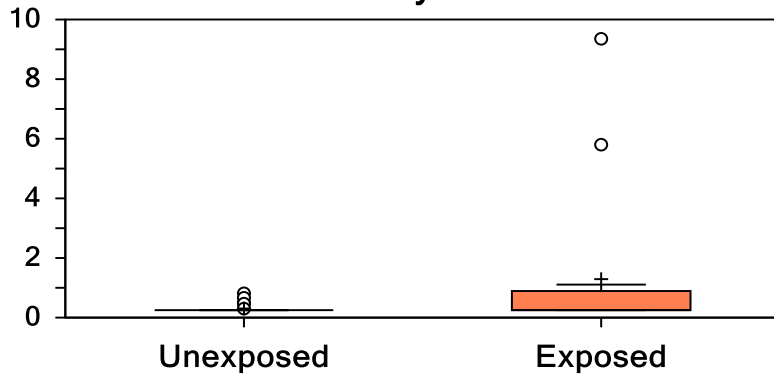

### leucylarginine

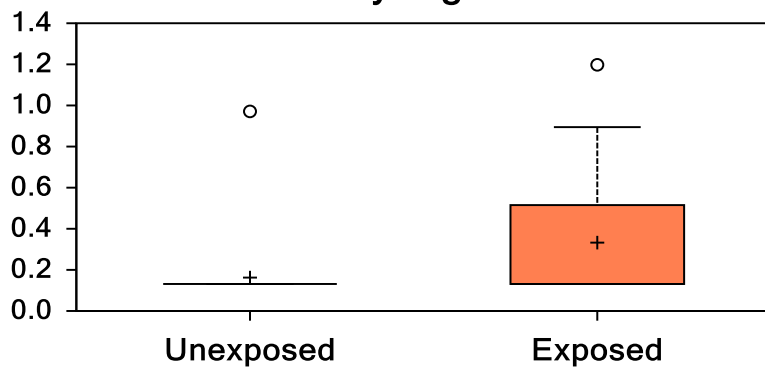

### leucylglutamate

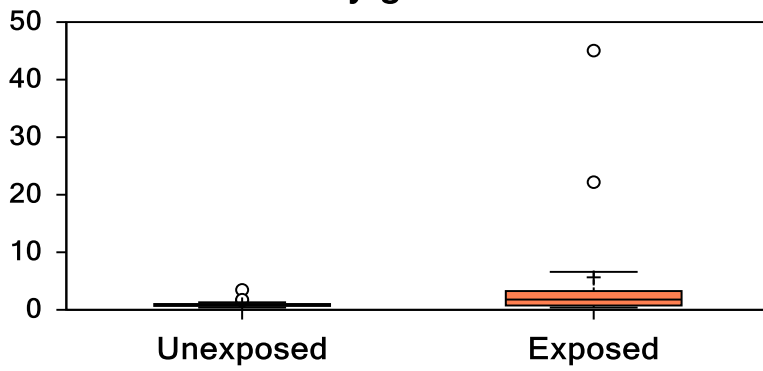

leucylserine

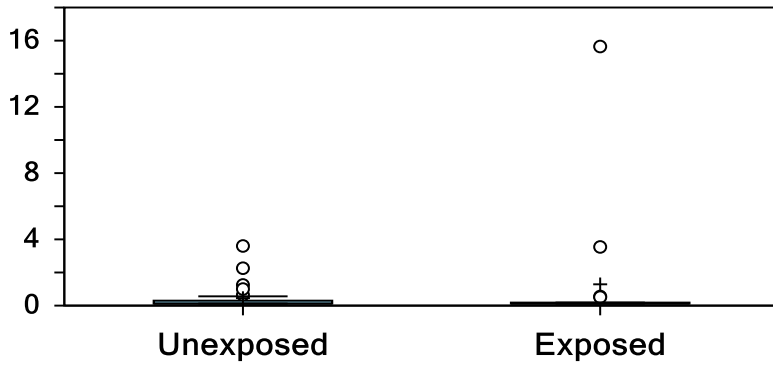

lysylleucine

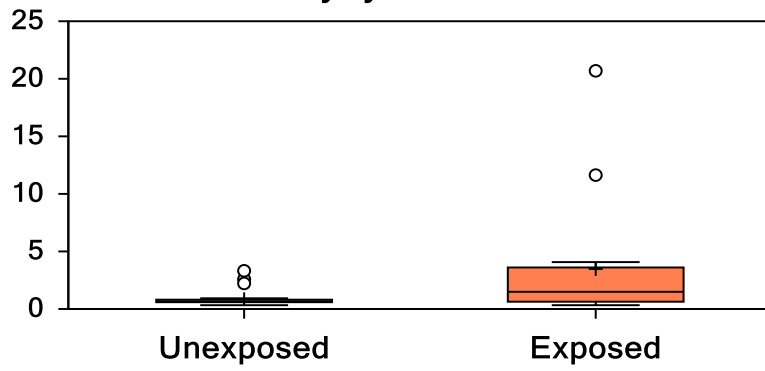

phenylalanylserine

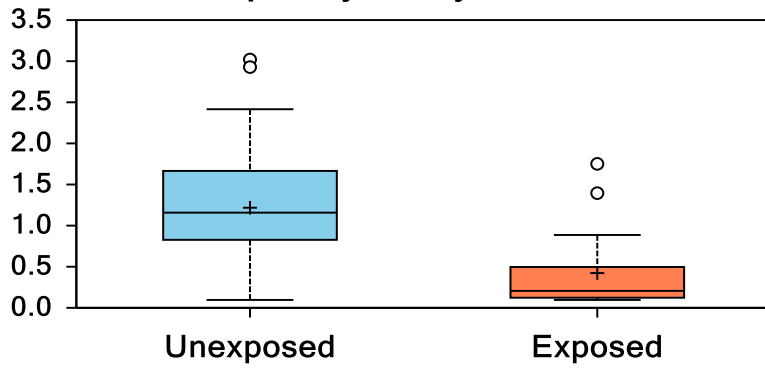

### threonylleucine

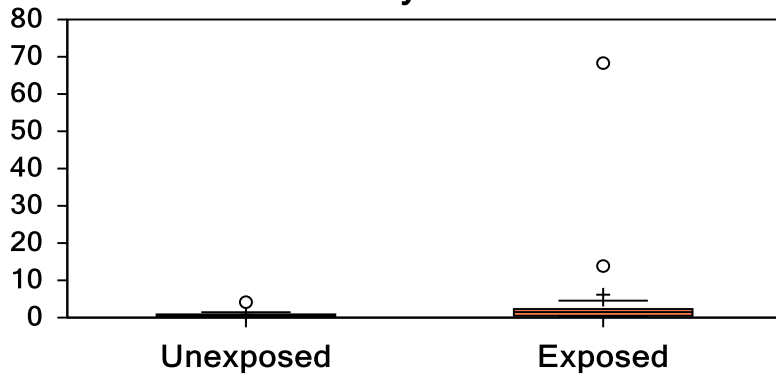

### tyrosylleucine

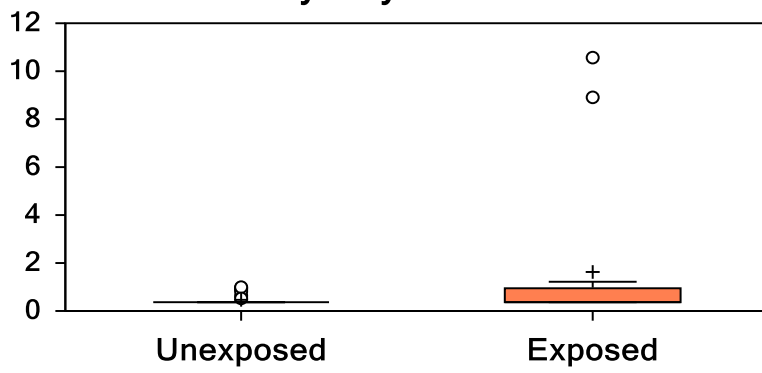

### alpha-glutamyltyrosine

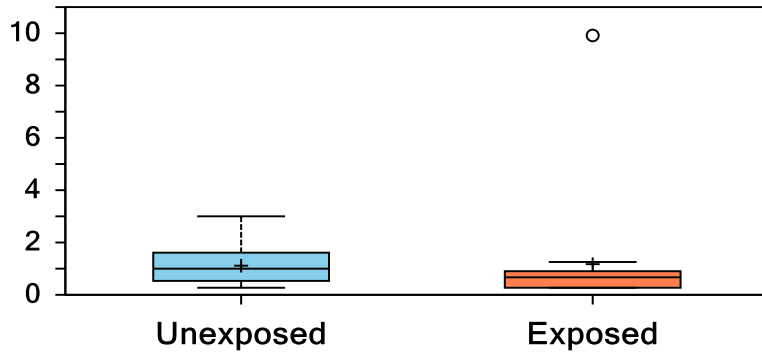

### alpha-glutamylvaline

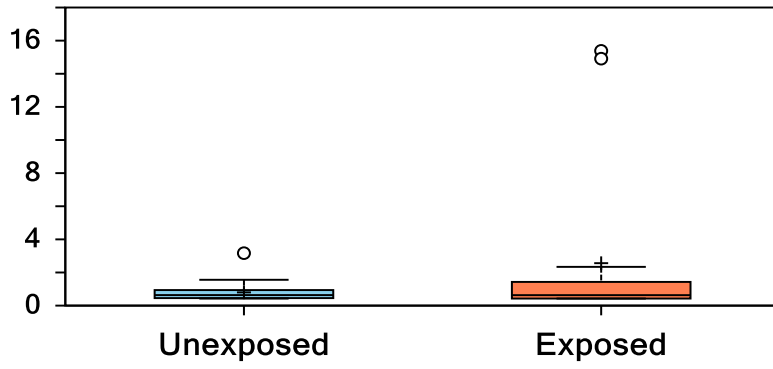

### phenylacetylphenylalanine

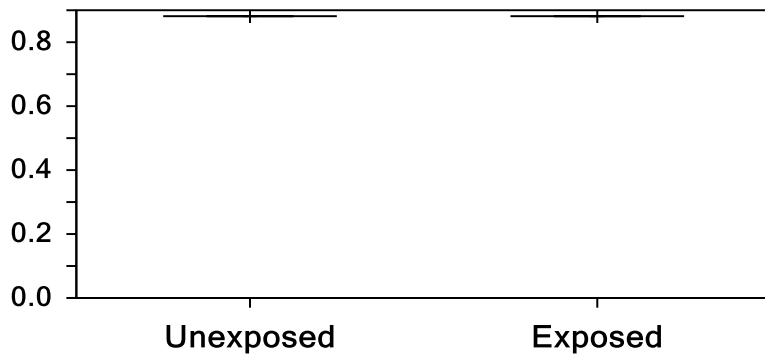

### gamma-glutamylisoleucine\*

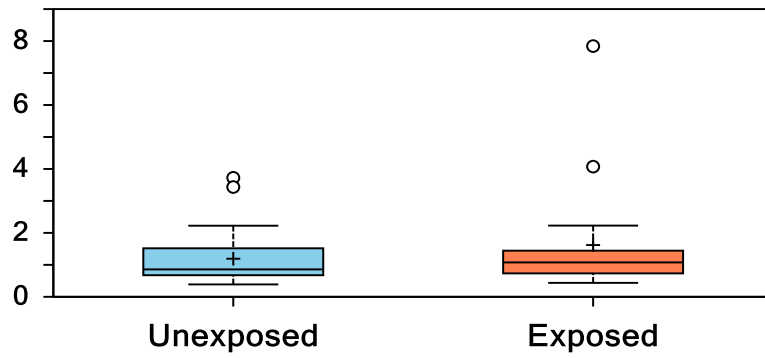

**gamma-glutamylglutamine**

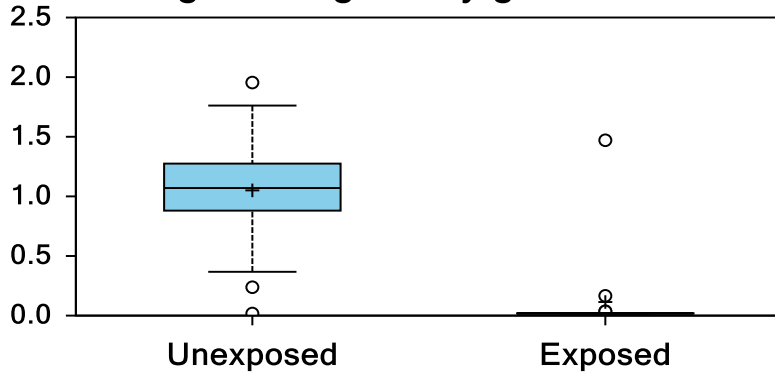

**gamma-glutamylthreonine\***

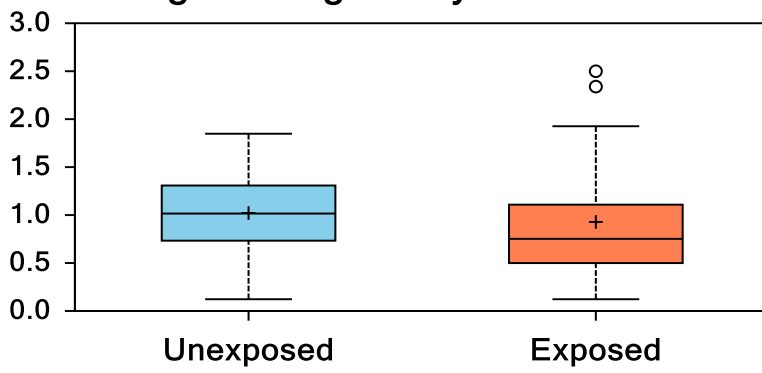

**bradykinin**

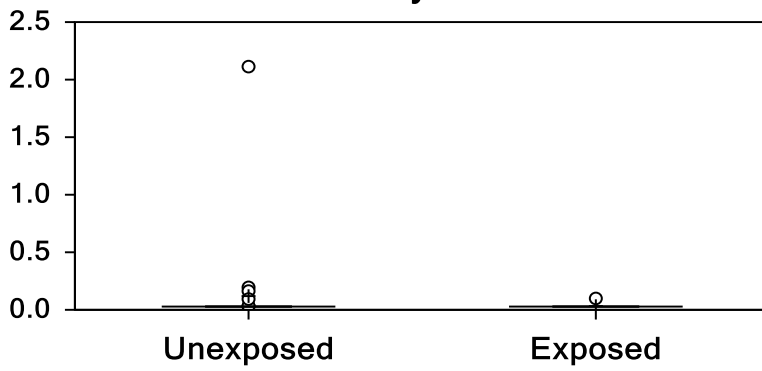

### HXGXA\*

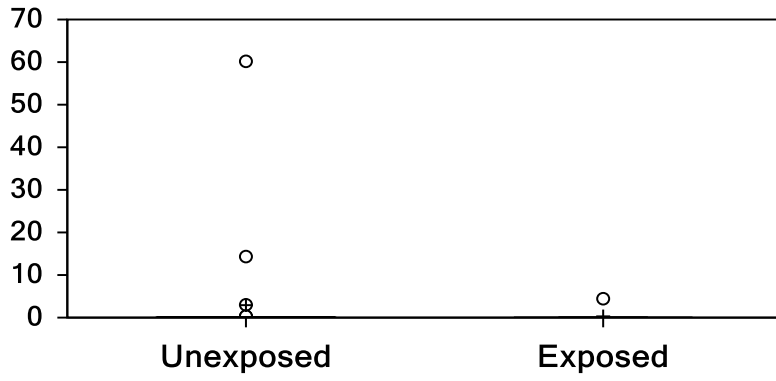

### [H]HWESASLLR[OH]

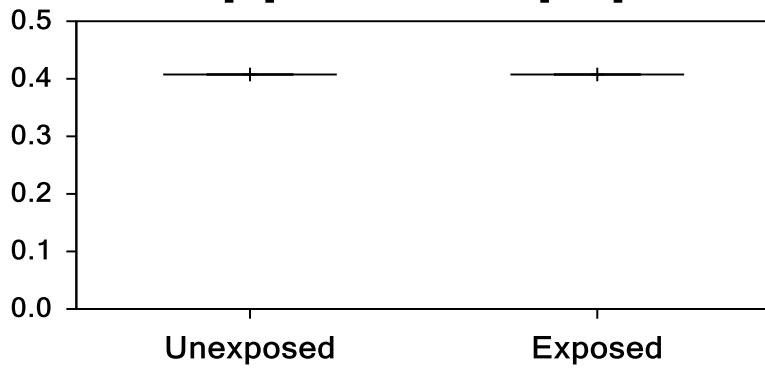

### ADpSGEGDFXAEGGGVR\*

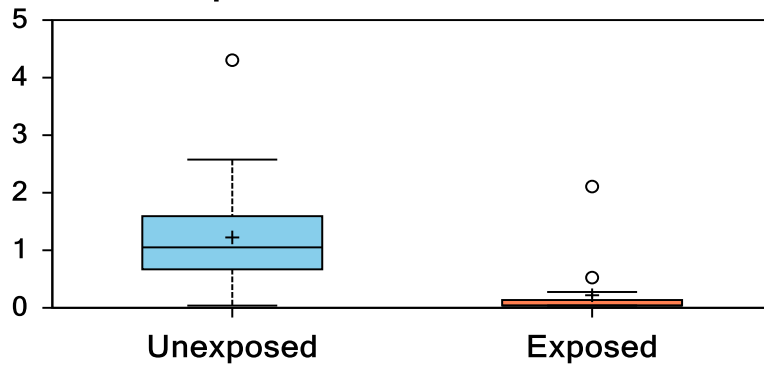

**erythronate\***

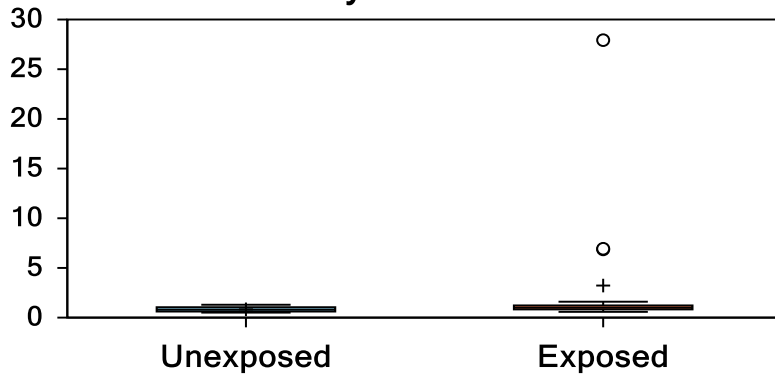

**fructose**

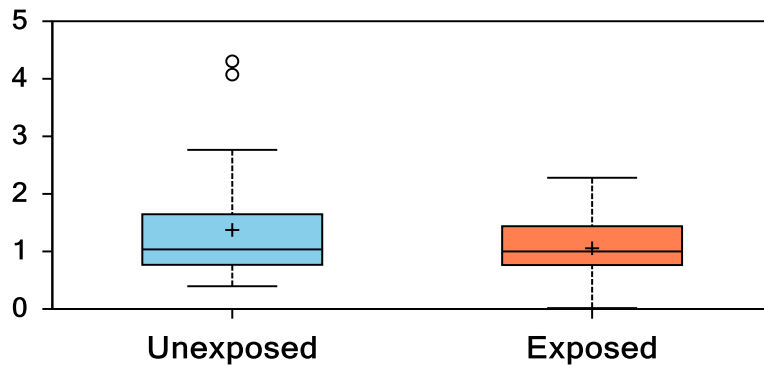

**mannitol**

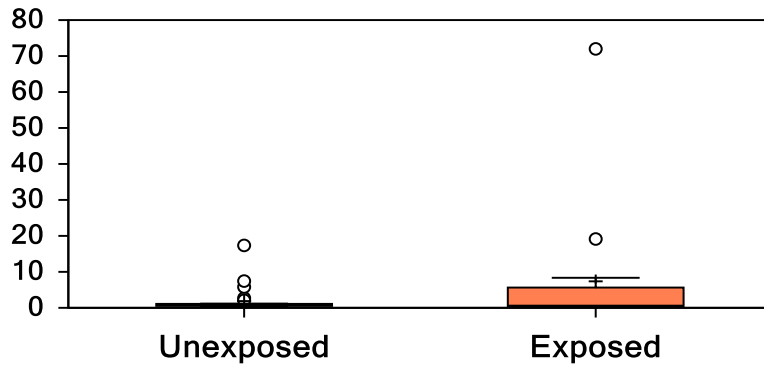



### sucrose

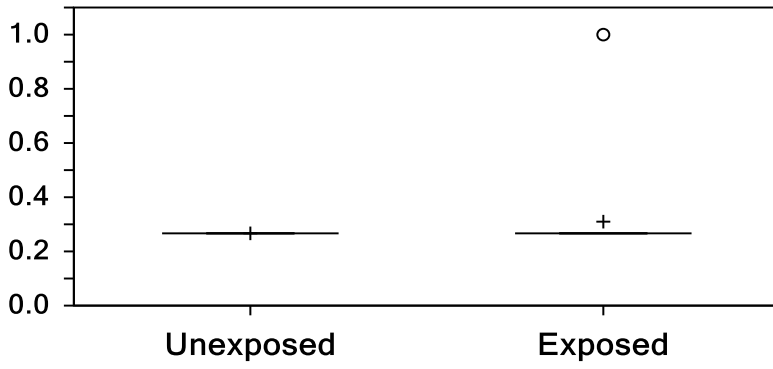

### 1,5-anhydroglucitol (1,5-AG)

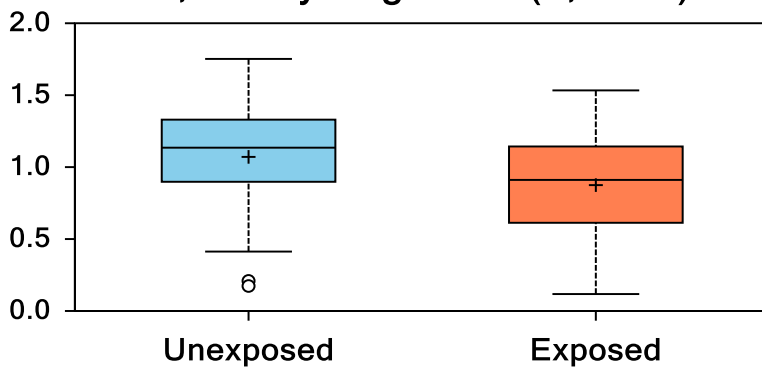

### 1,6-anhydroglucose

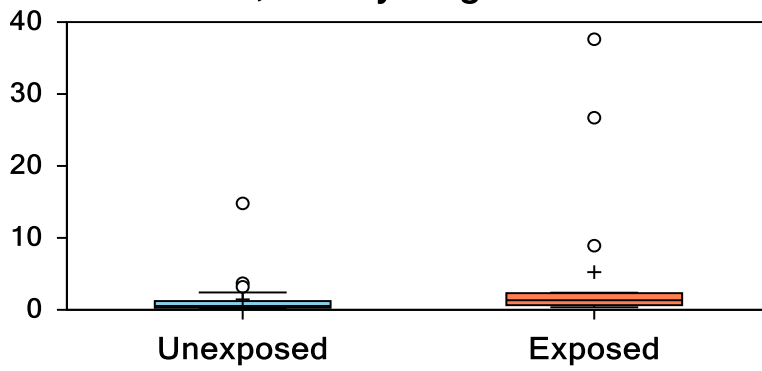

### lactate

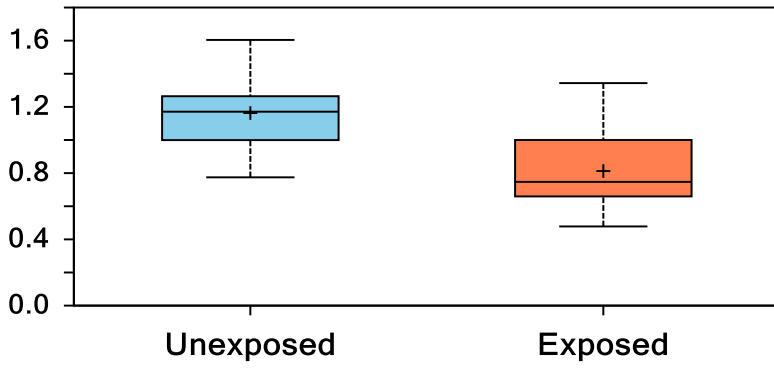

### arabitol

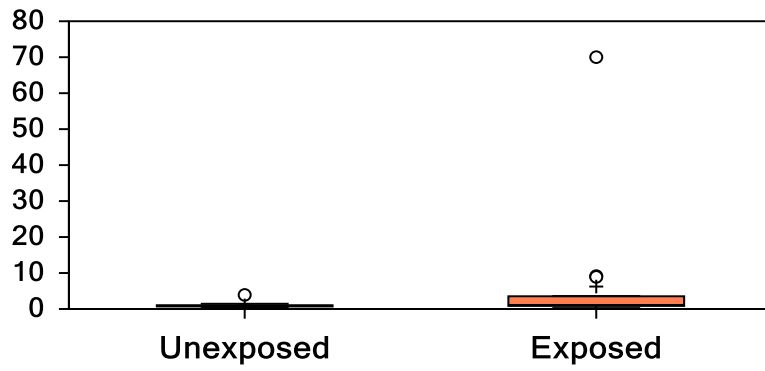

### gluconate

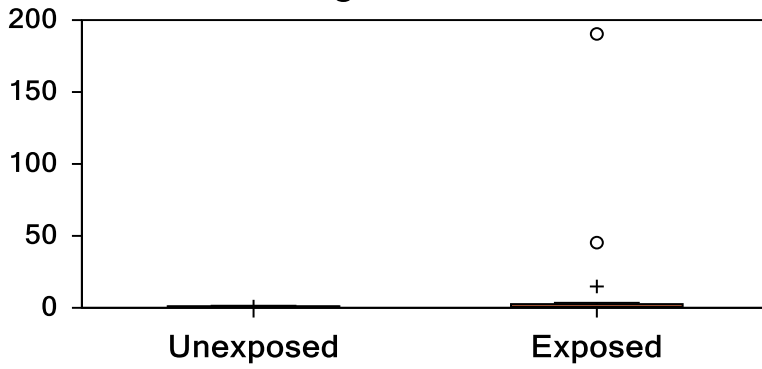

### arabinose

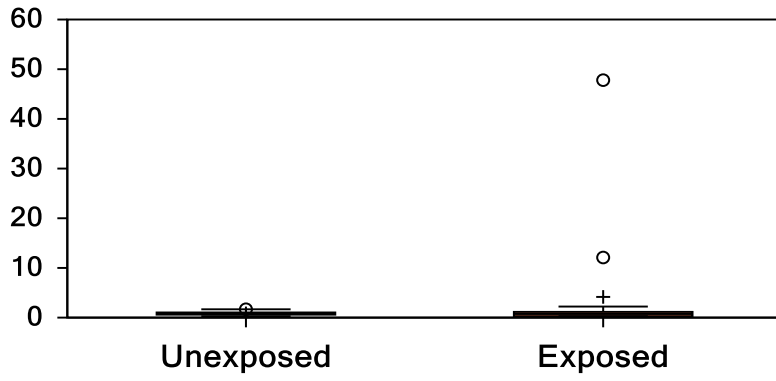

### citrate

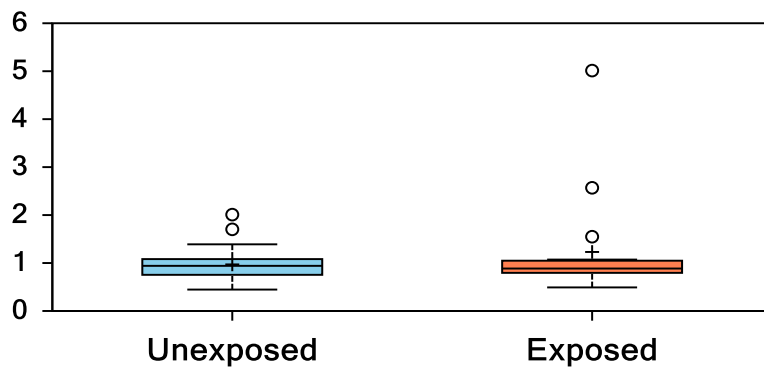

### alpha-ketoglutarate

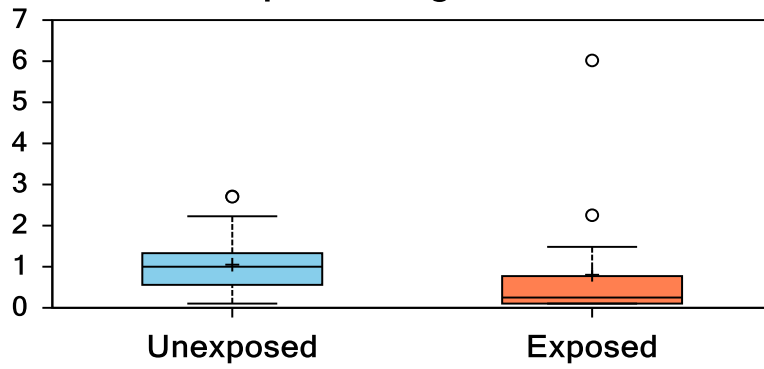

fumarate

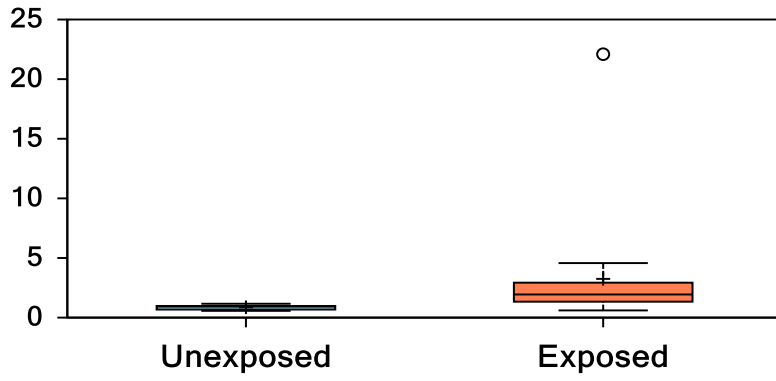

phosphate

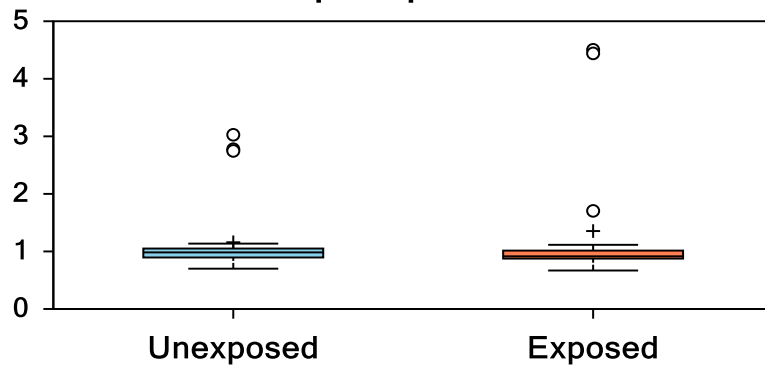

dihomo-linolenate (20:3n3 or n6)

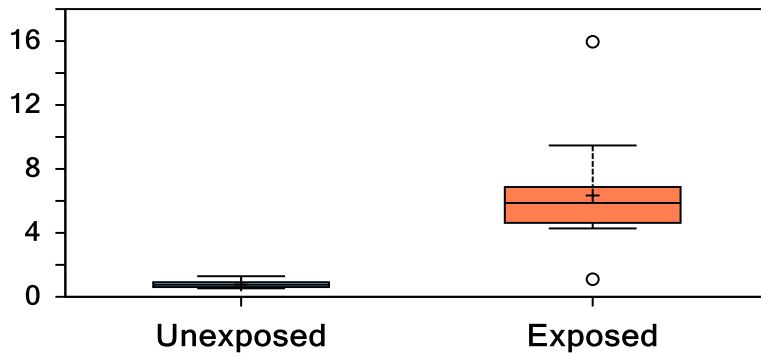

docosapentaenoate (n6 DPA; 22:5n6)

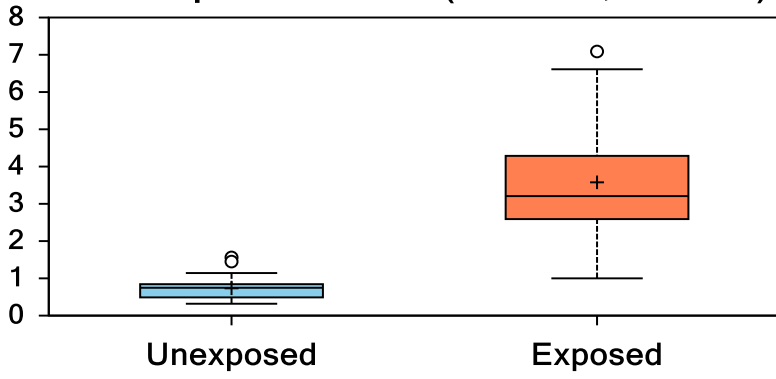

caproate (6:0)

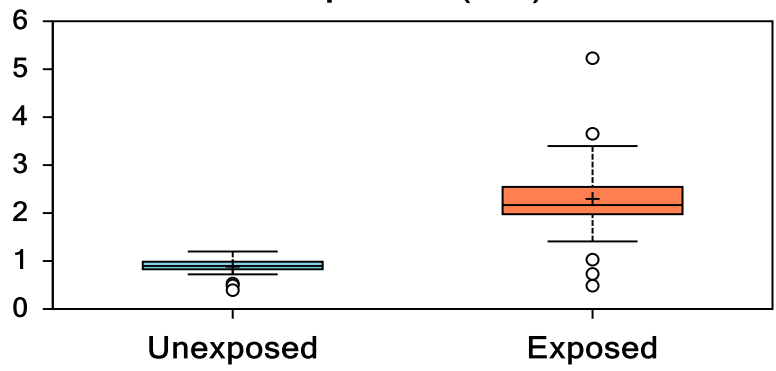

pelargonate (9:0)

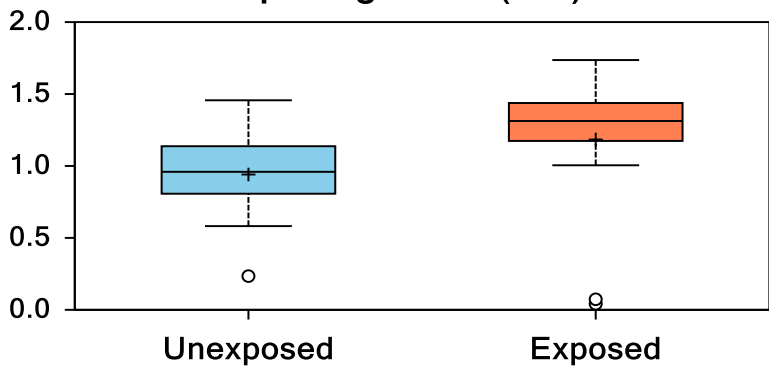

10-undecenoate (11:1n1)

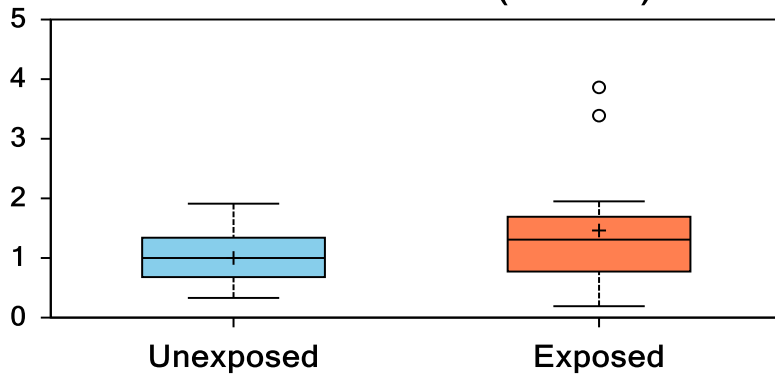

myristate (14:0)

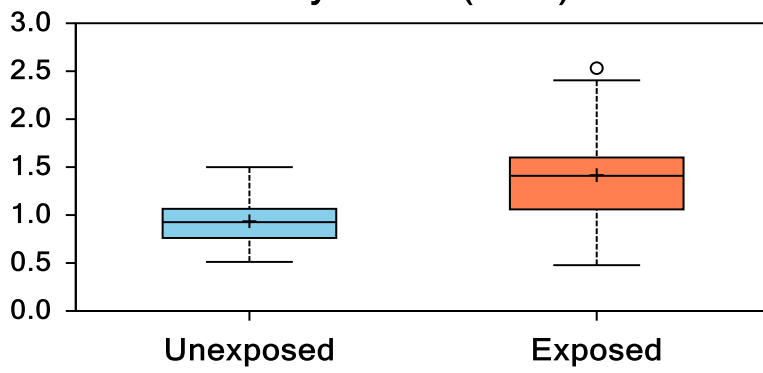

palmitate (16:0)

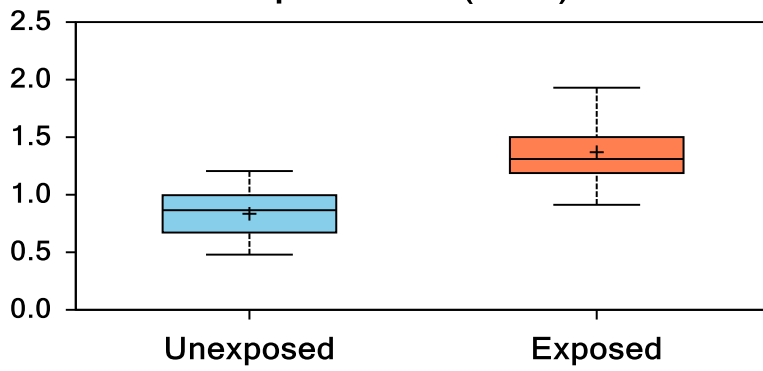

10-heptadecenoate (17:1n7)

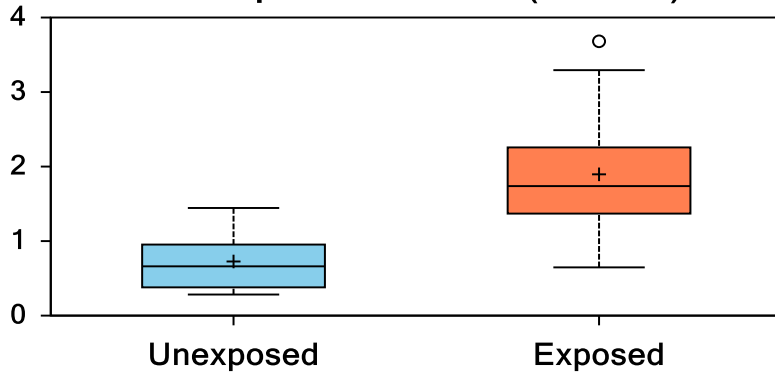

cis-vaccenate (18:1n7)

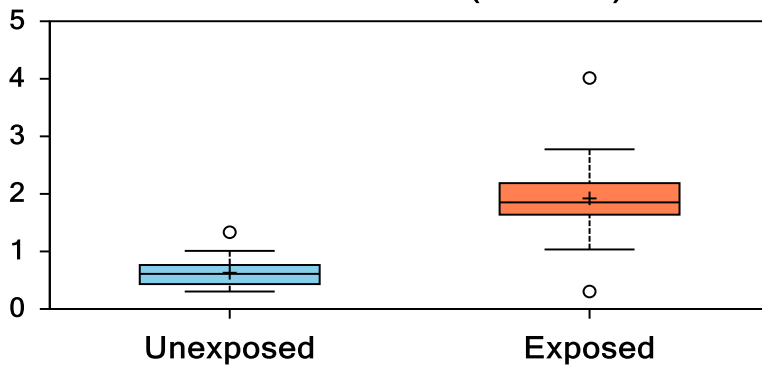

10-nonadecenoate (19:1n9)

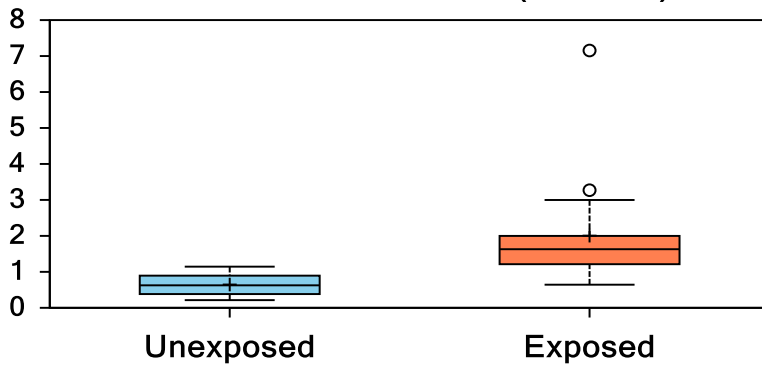

arachidonate (20:4n6)

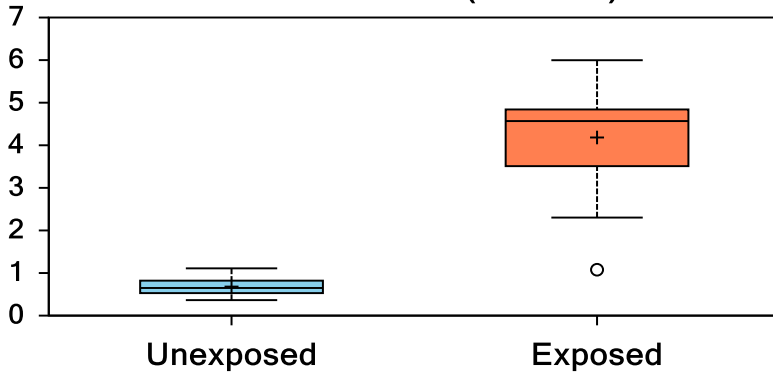

lignocerate (24:0)

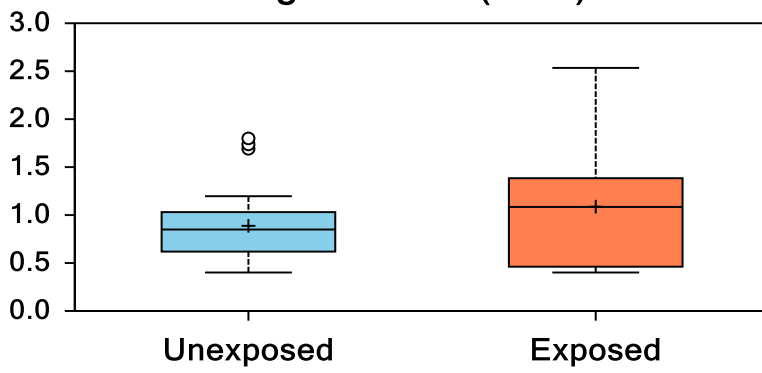

n-Butyl Oleate

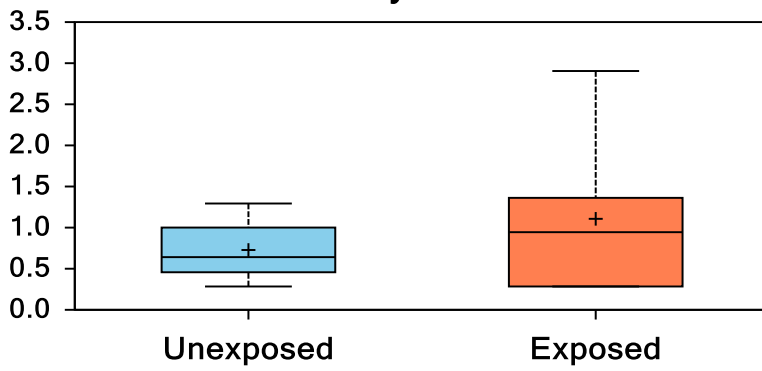



3-hydroxyoctanoate

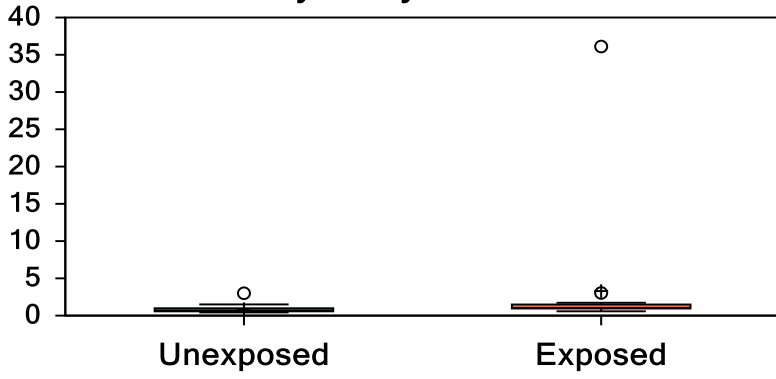

2-hydroxystearate

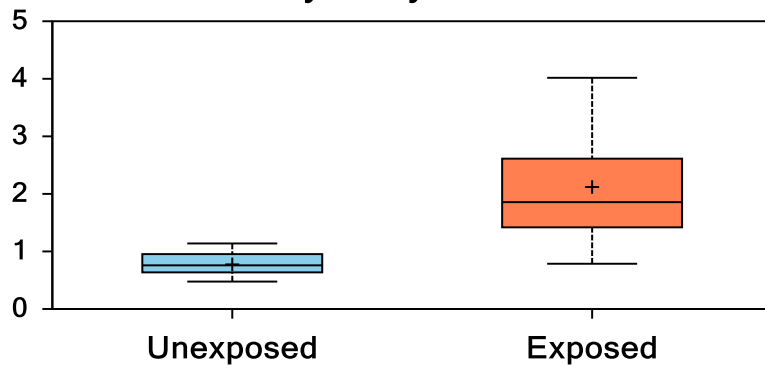

3-hydroxysebacate

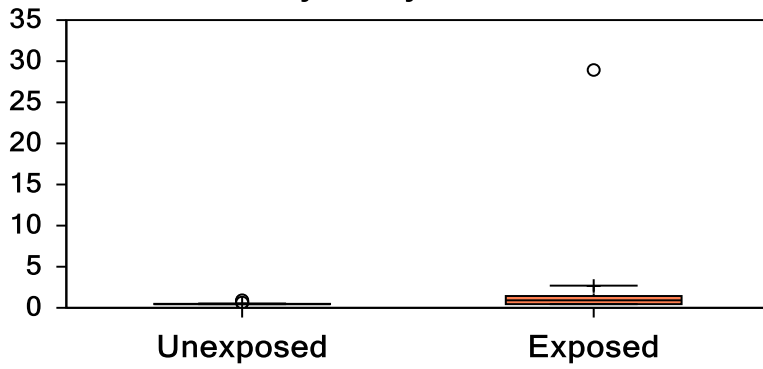

Isobar: pimelate, 3-methyladipate

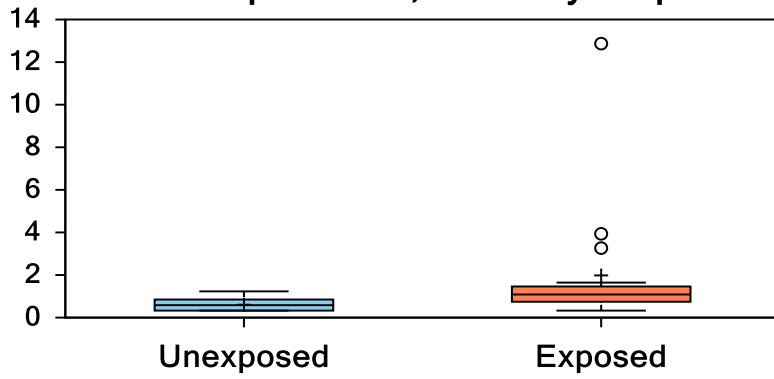

azelate (nonanedioate)

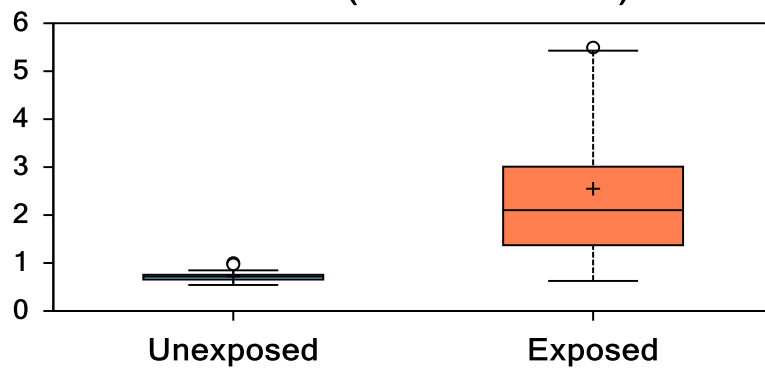

hexadecanedioate

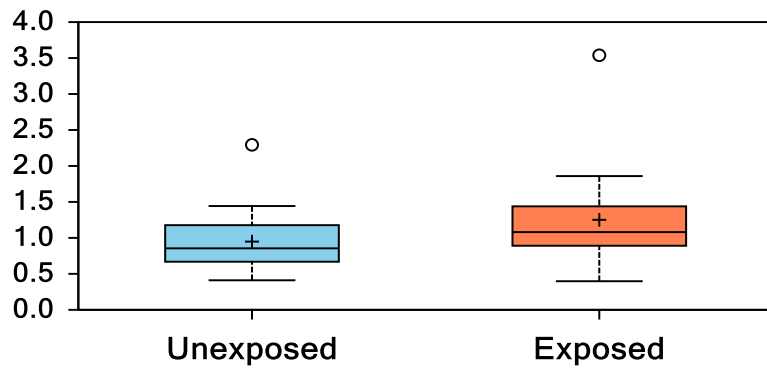

boxy-4-methyl-5-propyl-2-furanpropanoate (

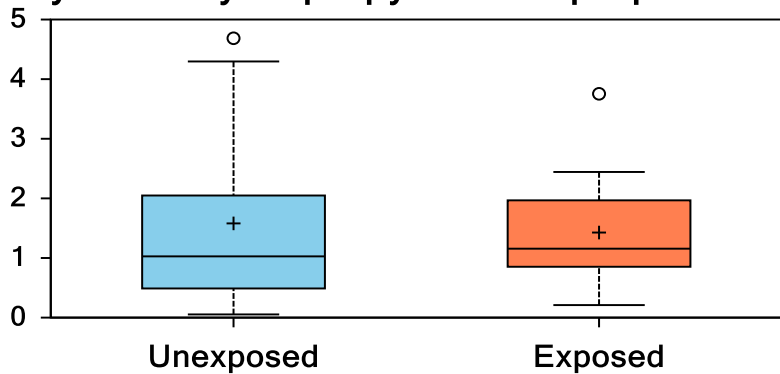

13-methylmyristic acid

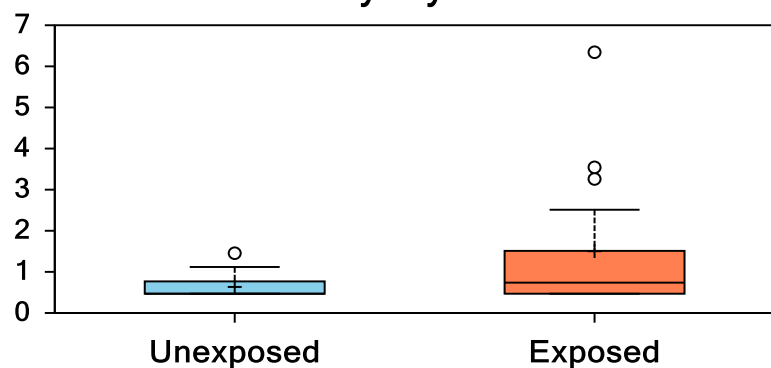

17-methylstearate

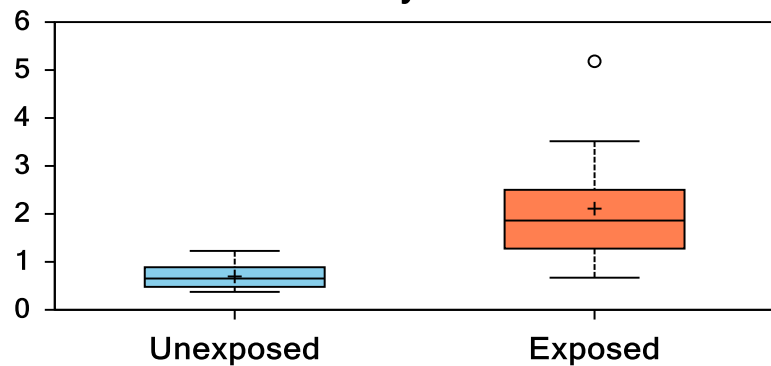

### 15-oxo-5Z,8Z,11Z,13E-eicosatetraenoate

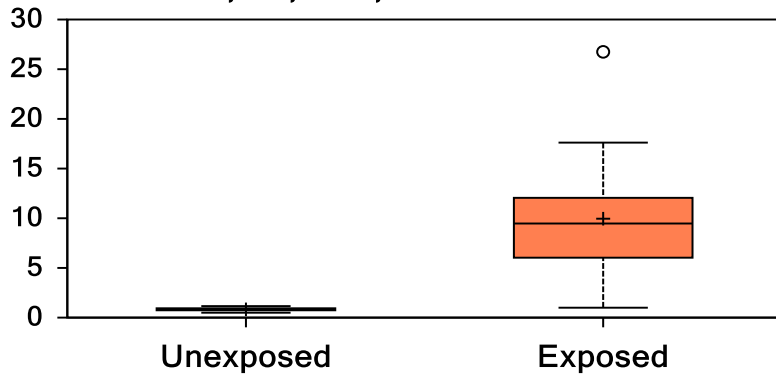

### 5-HETE

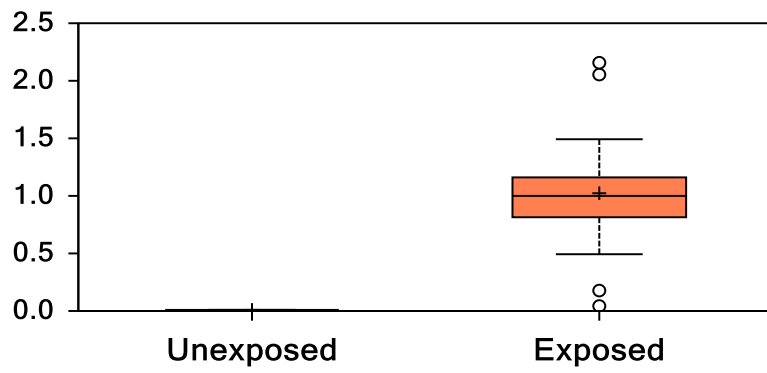

### 15-HETE

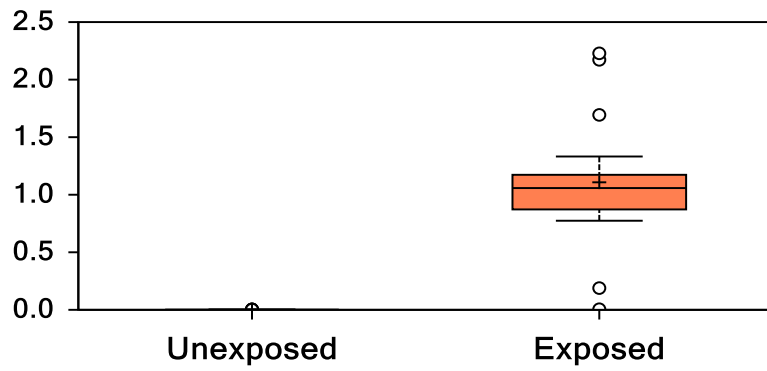

**butyrylcarnitine**

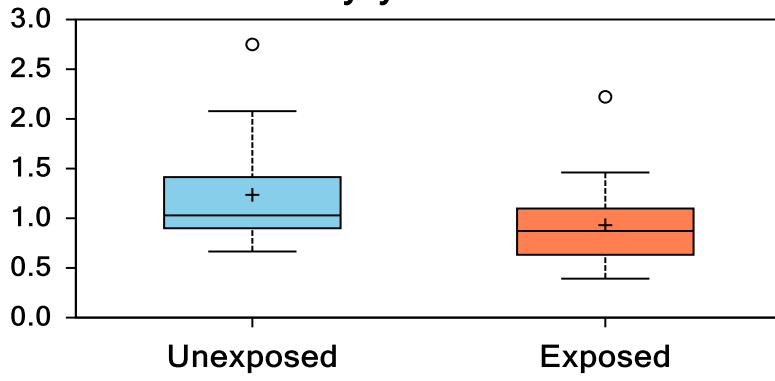

**deoxycarnitine**

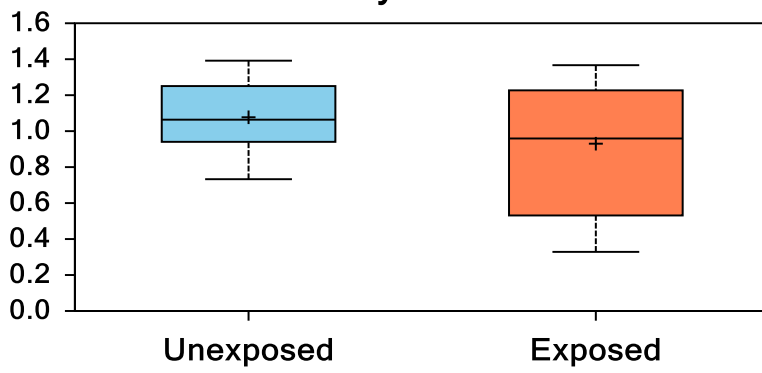

**acetylcarnitine**

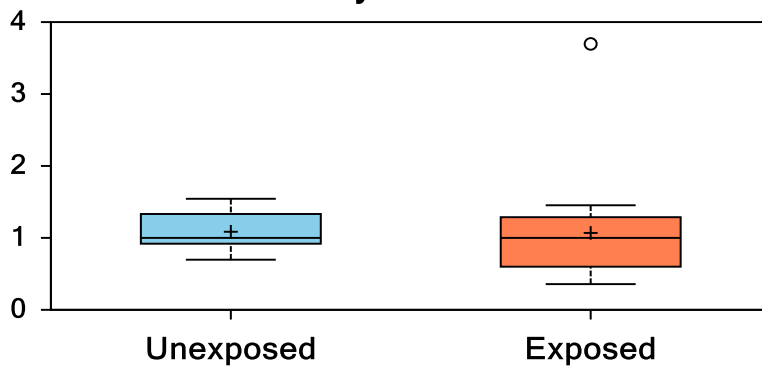

decanoylcarnitine

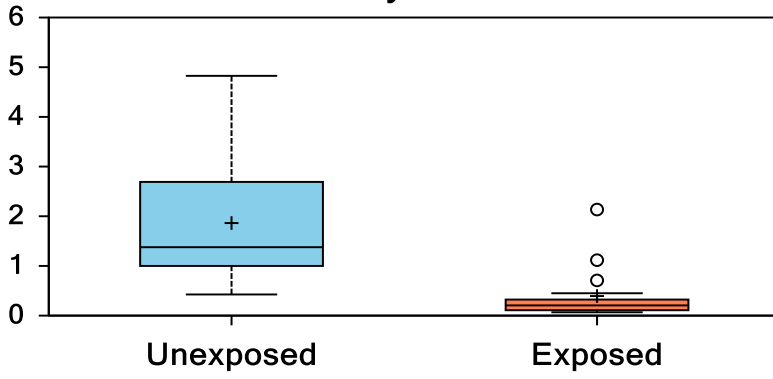

myristoylcarnitine

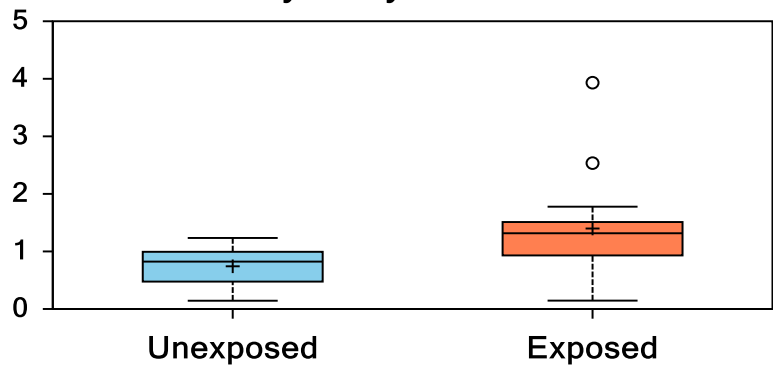

oleoylcarnitine

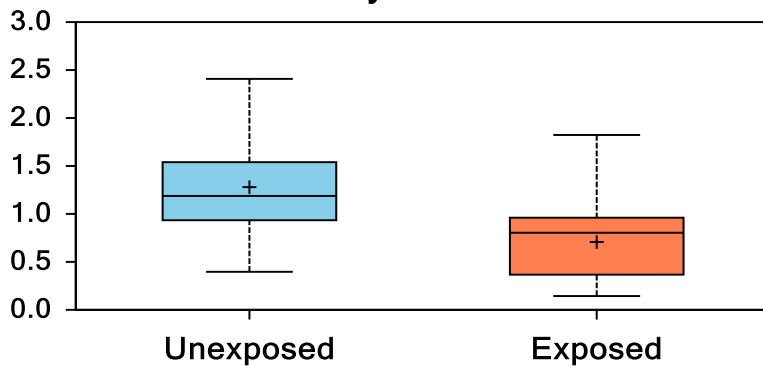

**taurocholate**

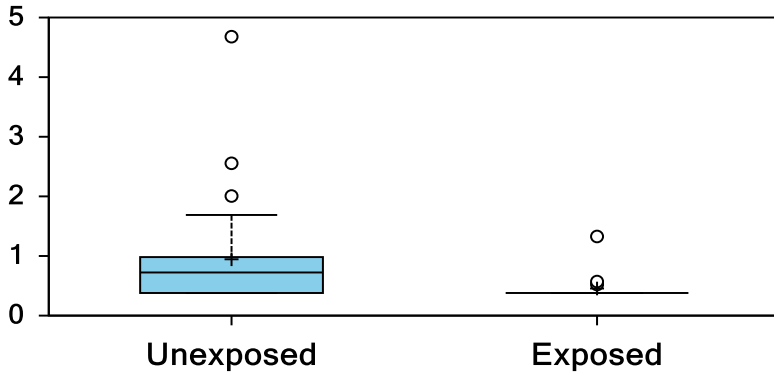

**taurodeoxycholate**

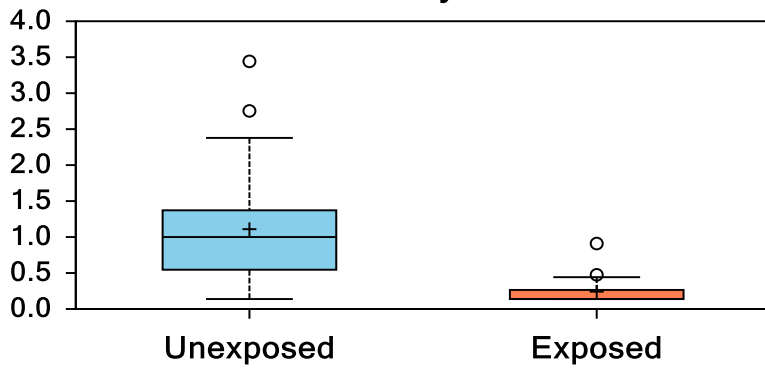

**glycochenodeoxycholate**

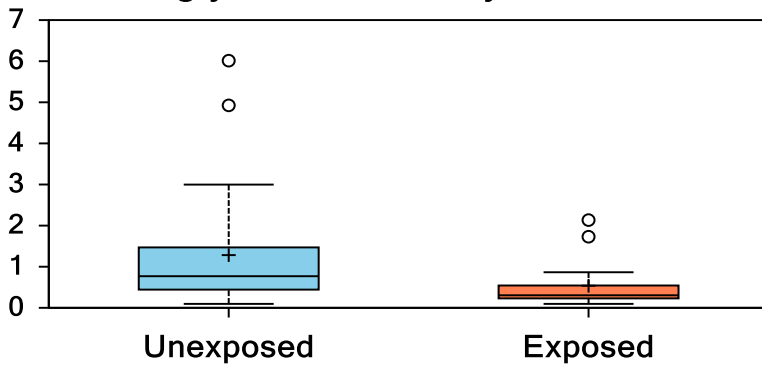

### glycocholenate sulfate\*

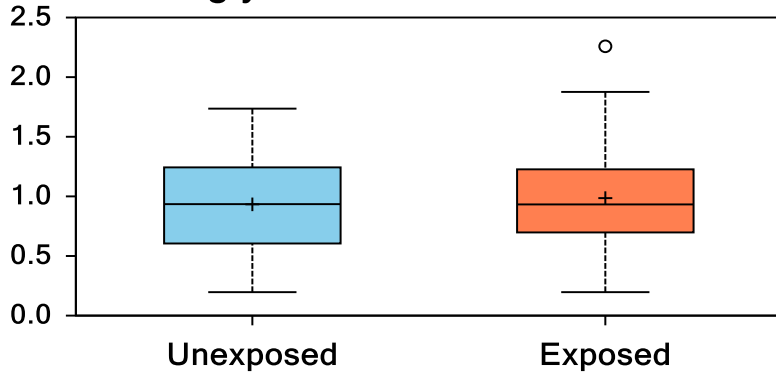

### tauroursodeoxycholate

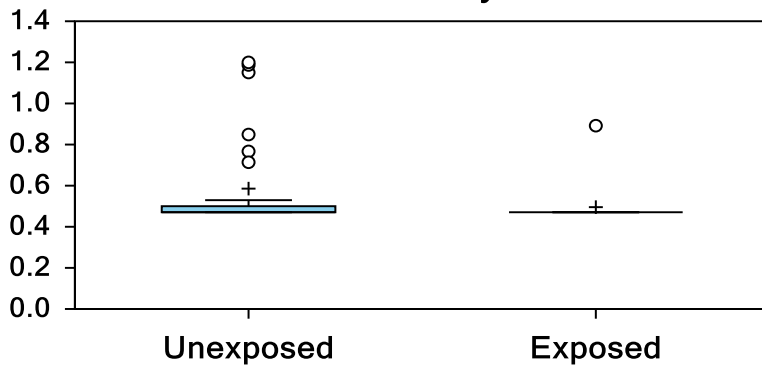

### choline

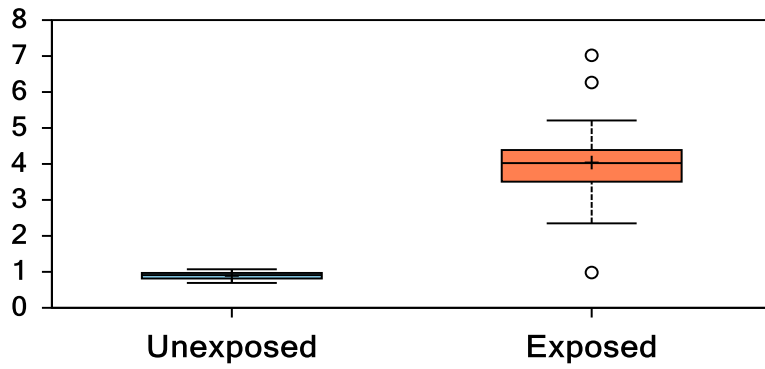



**myo-inositol**

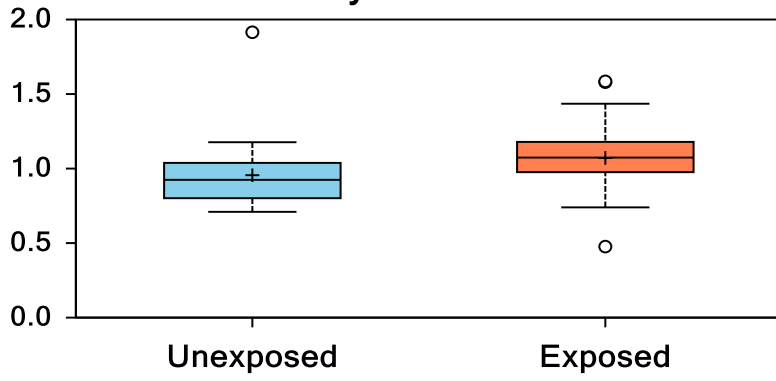

**scyllo-inositol**

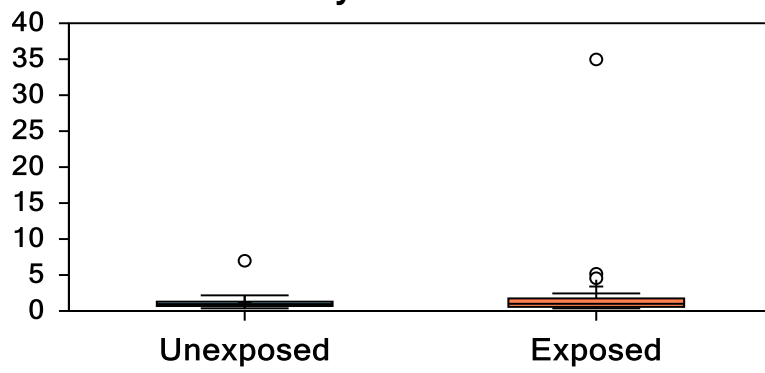

**1-palmitoylglycerophosphoethanolamine**

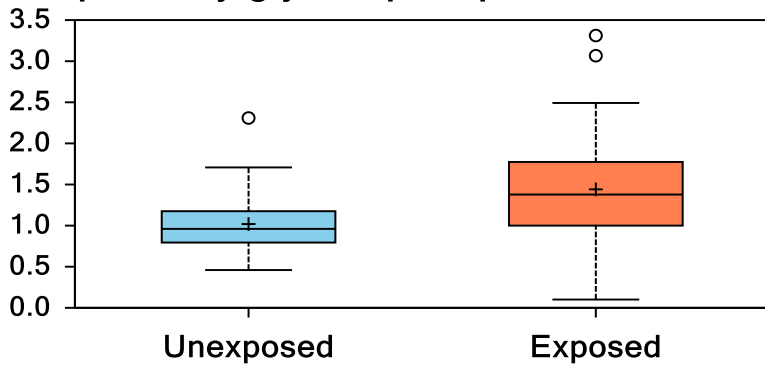

### 1-oleoylglycerophosphoethanolamine

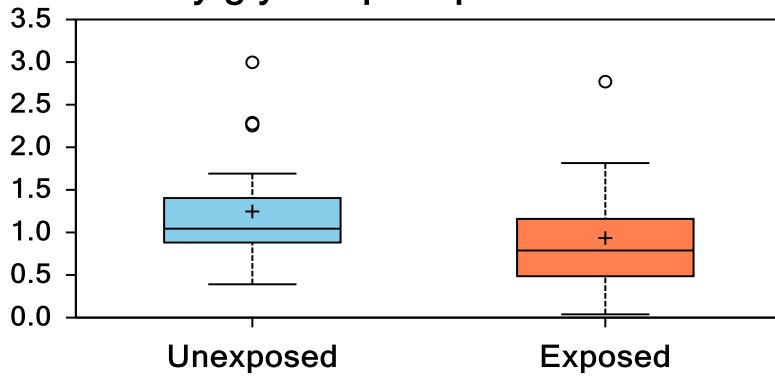

### 2-linoleoylglycerophosphoethanolamine

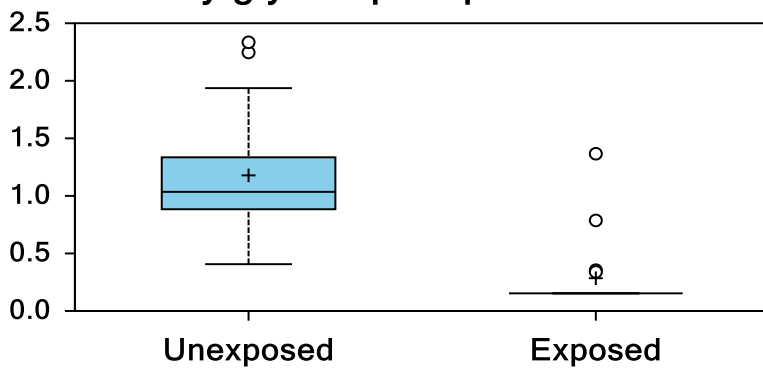

### 1-palmitoylglycerophosphate

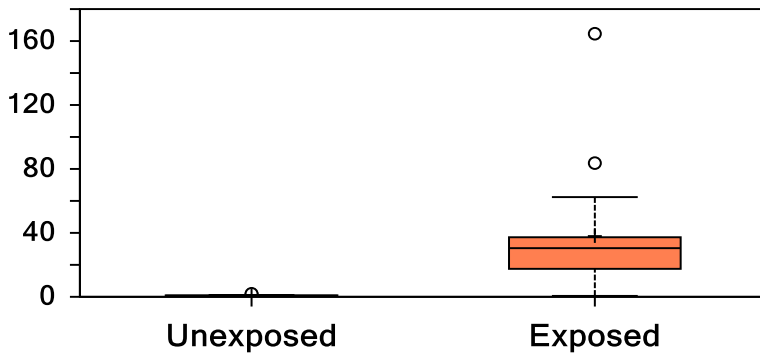

### 1-pentadecanoylglycerophosphocholine'

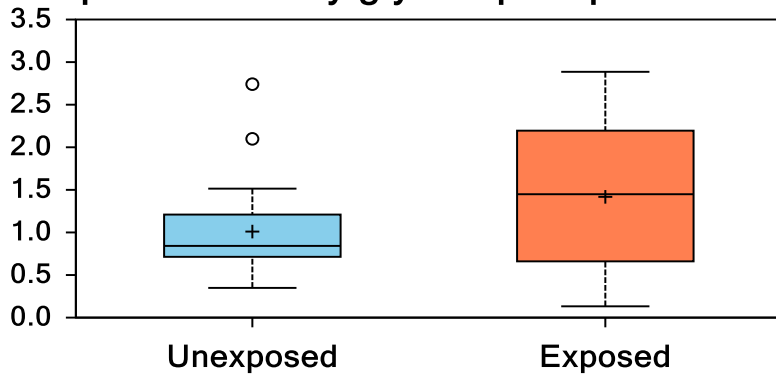

### 1-palmitoleoylglycerophosphocholine\*

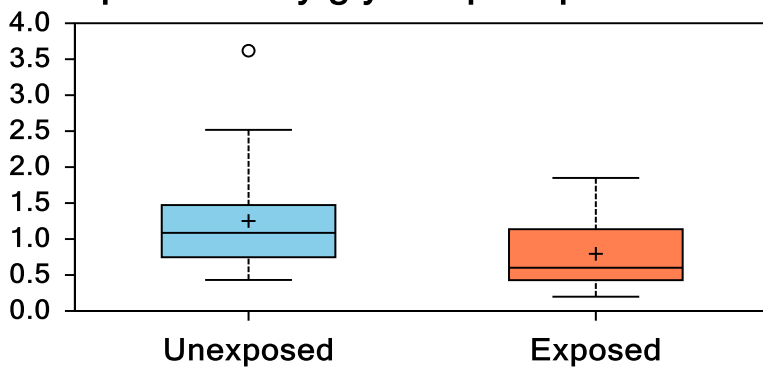

### 1-stearoylglycerophosphocholine

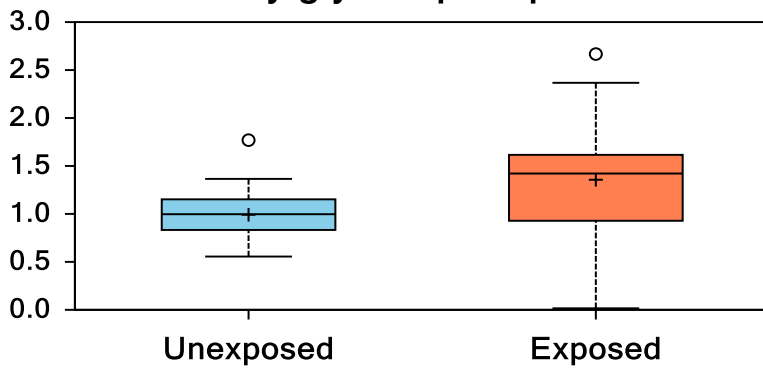

2-oleoylglycerophosphocholine\*

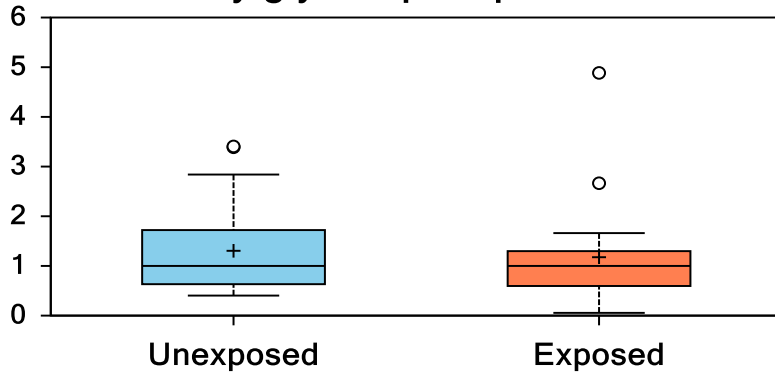

1-arachidoylglycerophosphocholine

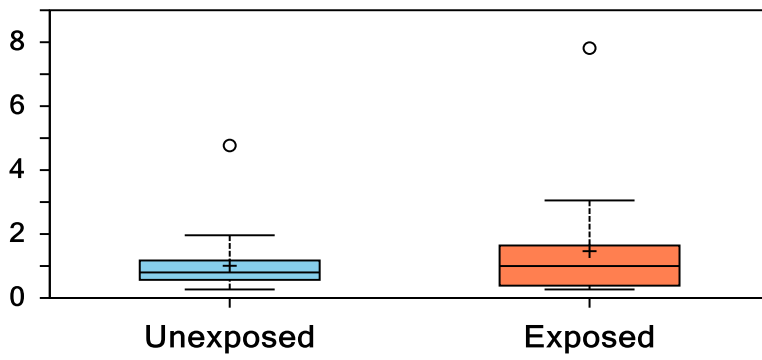

2-eicosatrienoylglycerophosphocholine\*

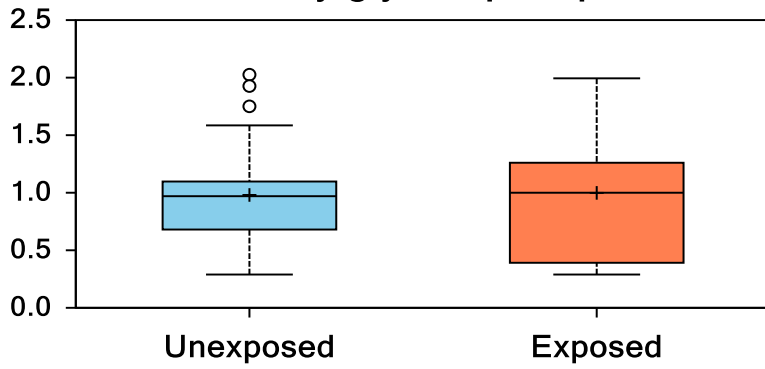

### 1-docosapentaenoylglycerophosphocholin

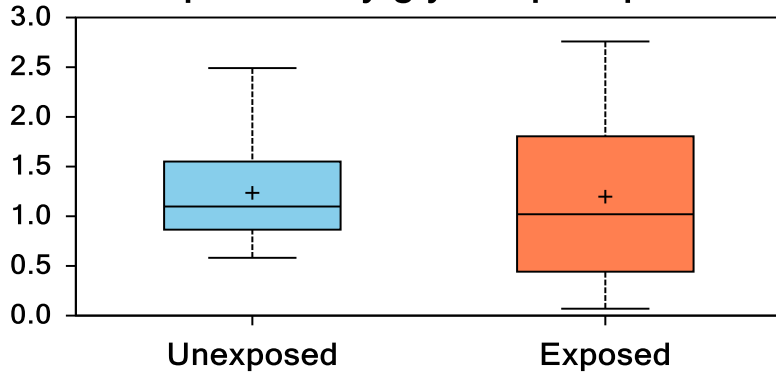

### 1-stearoylglycerophosphoinositol

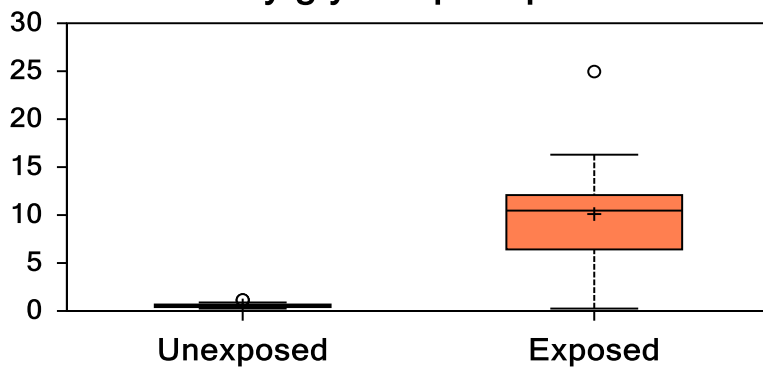

### 1-stearoylglycerol (1-monostearin)

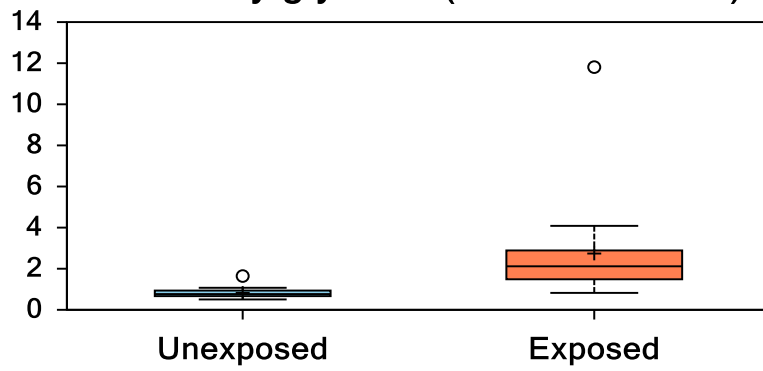

### cosaehaenoylglycerol (1-monodocosahexa

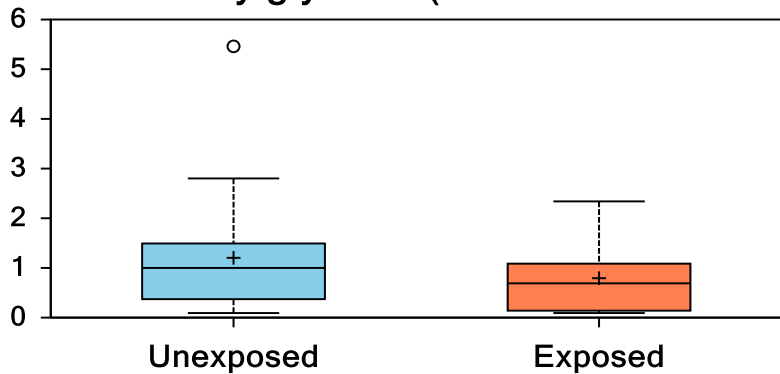

### phytosphingosine

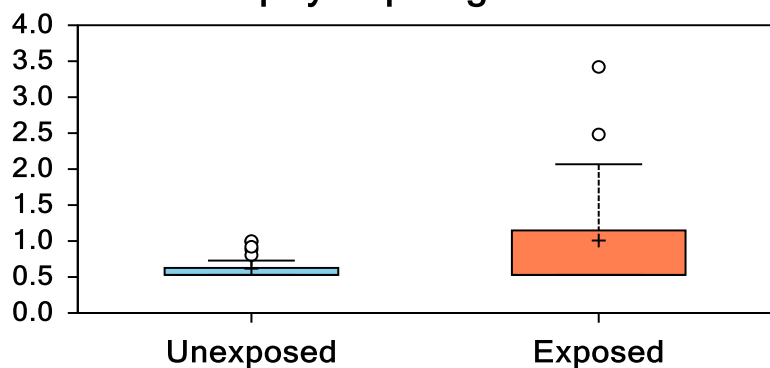

### stearoyl sphingomyelin

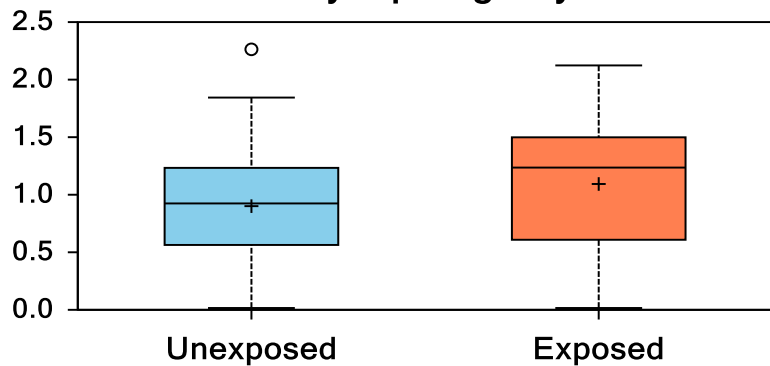

### squalene

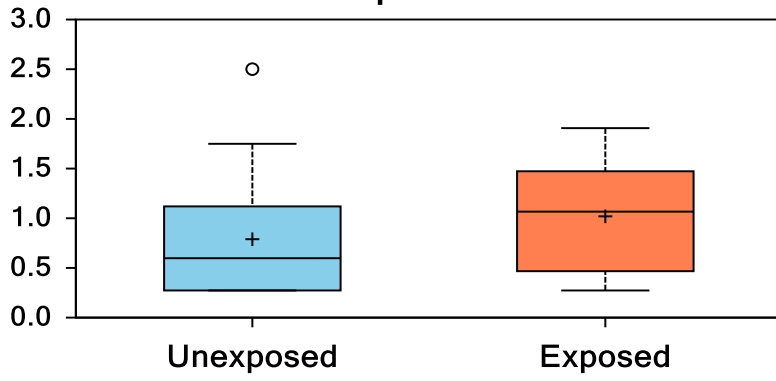

### 7-beta-hydroxycholesterol

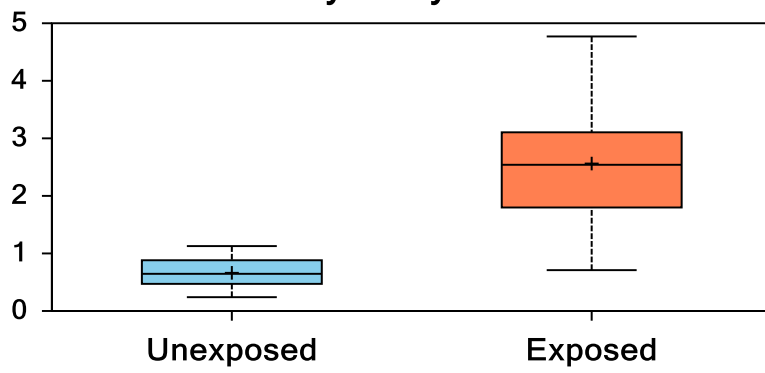

### epiandrosterone sulfate

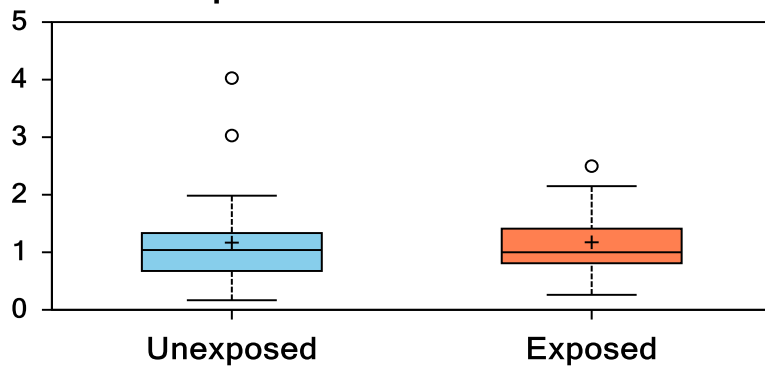

### corticosterone

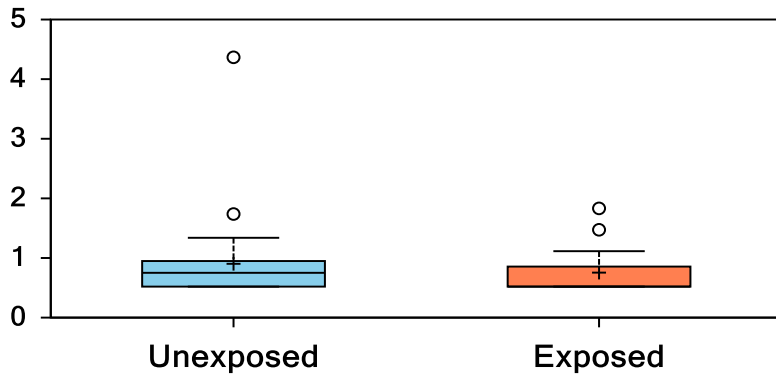

### alpha-hydroxy-3-oxo-4-cholestenoate (7-Ho

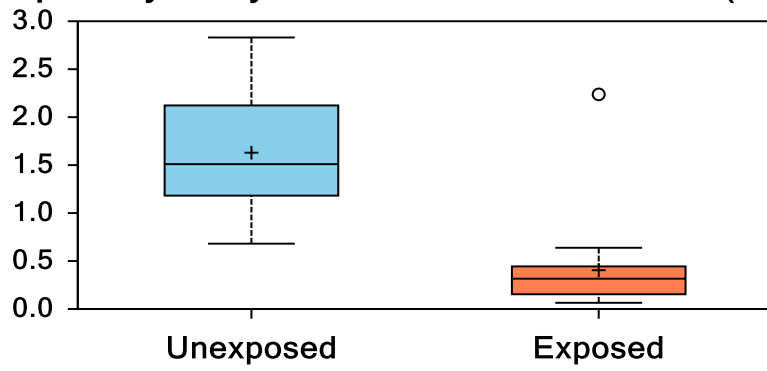

### alpha-androstan-3alpha,17alpha-diol disulfate

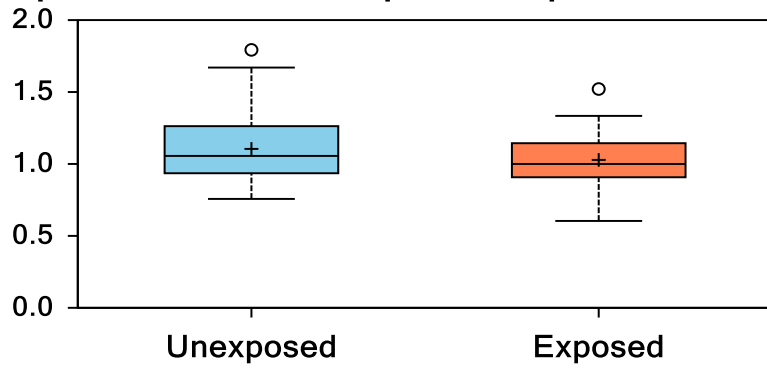



11alpha-pregnan-3beta,20alpha-diol monosulfate

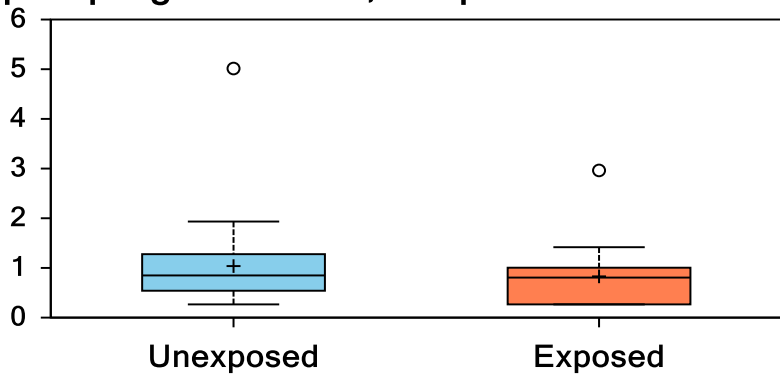

pregn steroid monosulfate\*

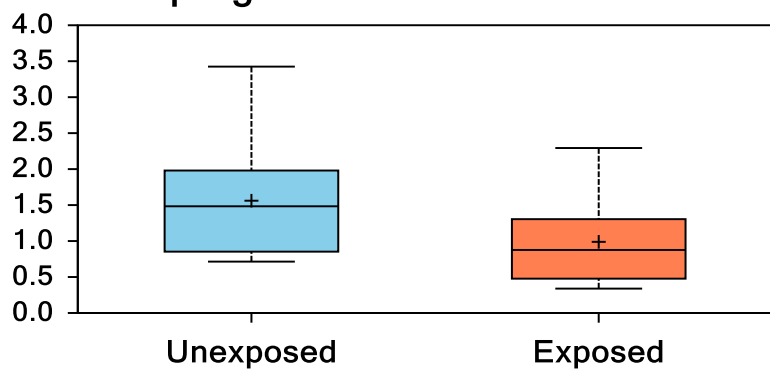

pregnenolone sulfate

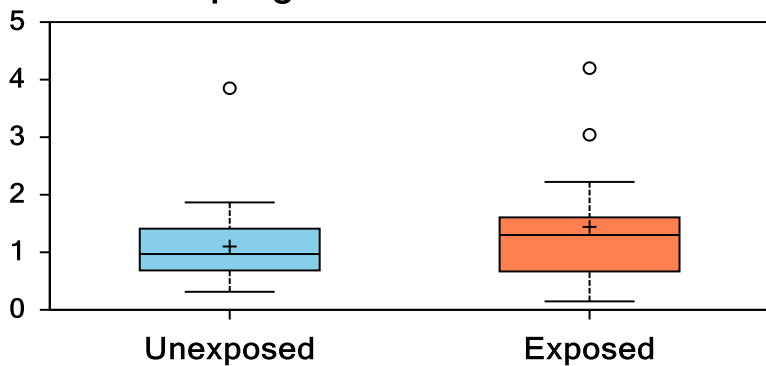

### xanthosine

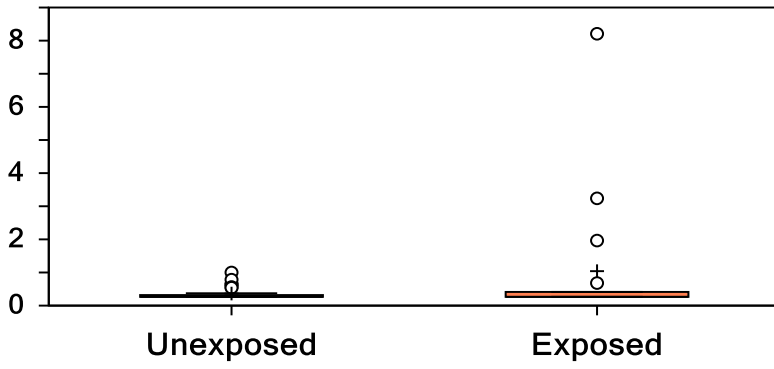

### adenosine

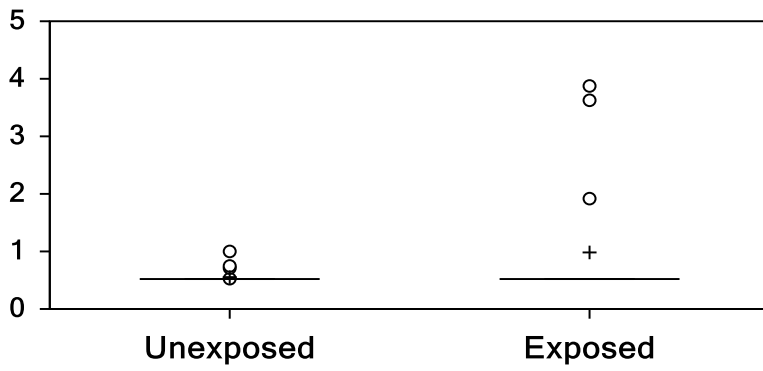

### adenosine 5'-monophosphate (AMP)

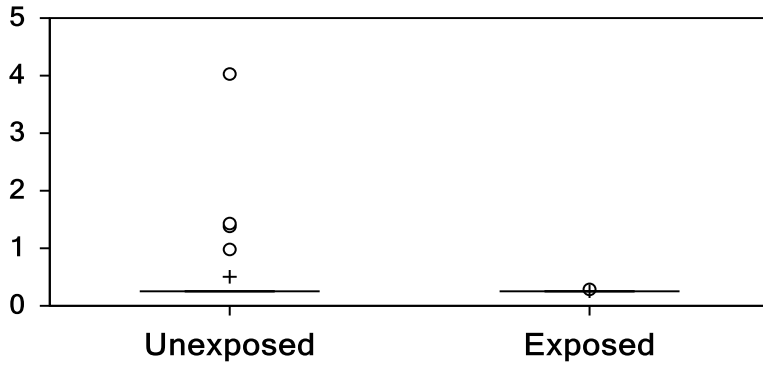

### N2-methylguanosine

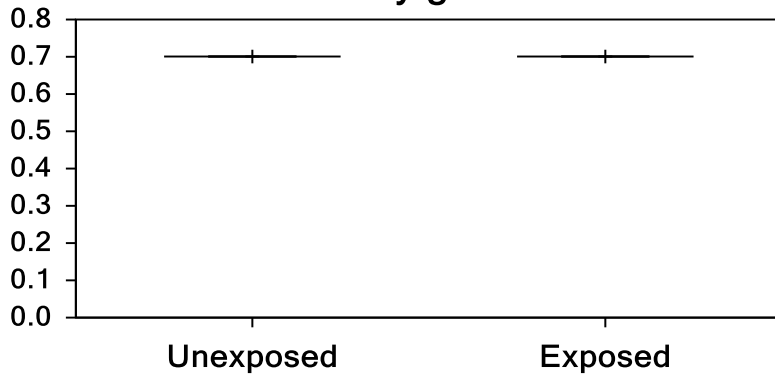

### N6-carbamoylthreonyladenosine

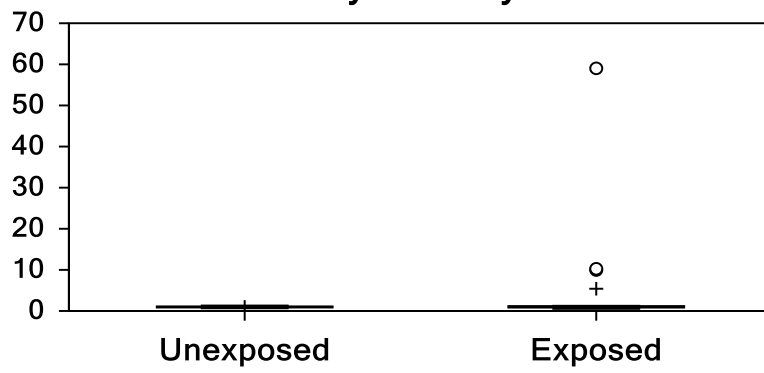

### N4-acetylcytidine

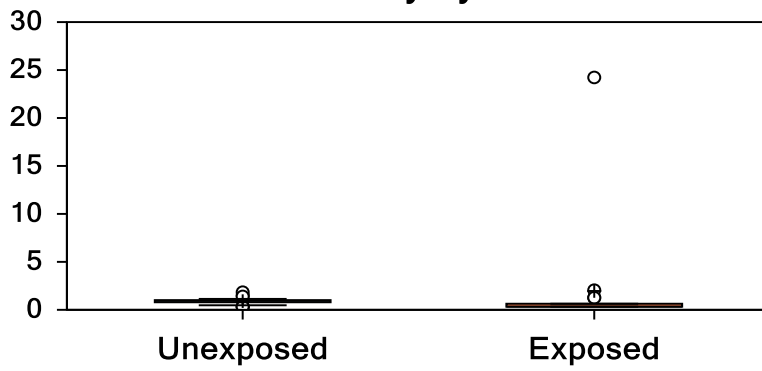

thymidine

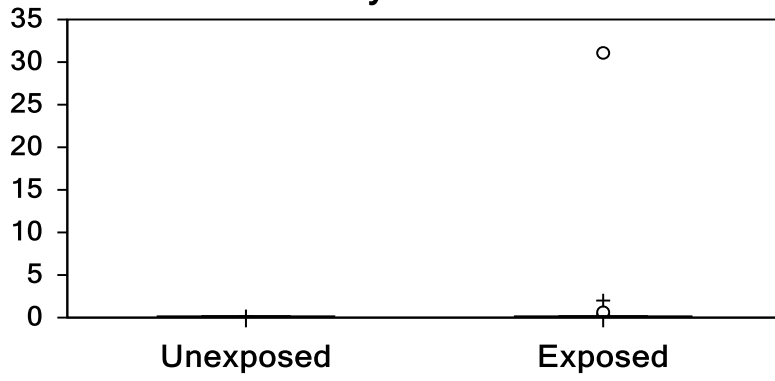

uridine

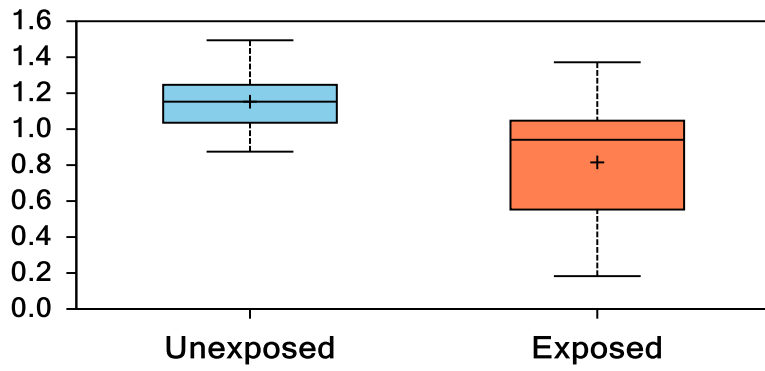

gulono-1,4-lactone

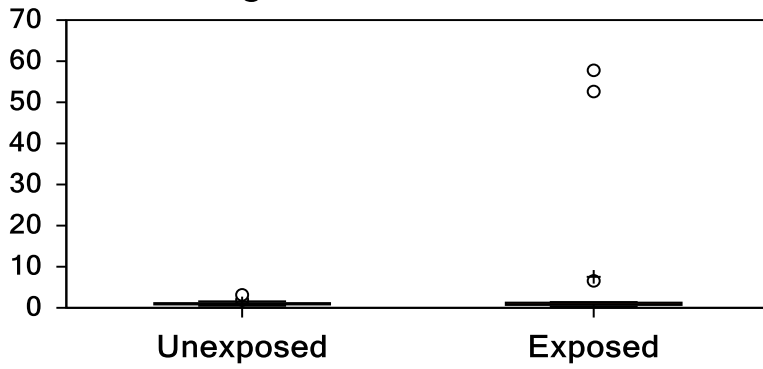

**glucarate (saccharate)**

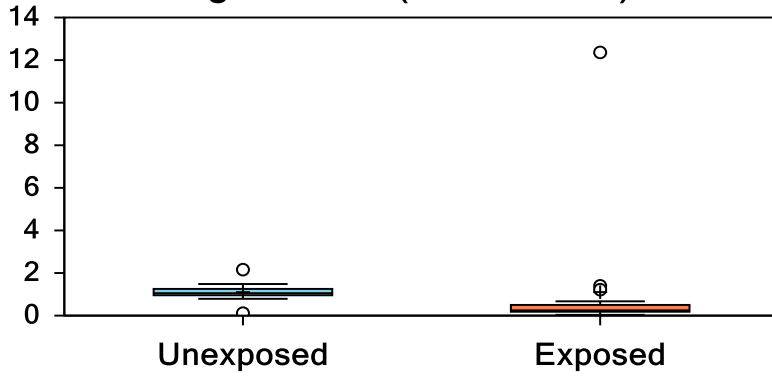

**L-urobilin**

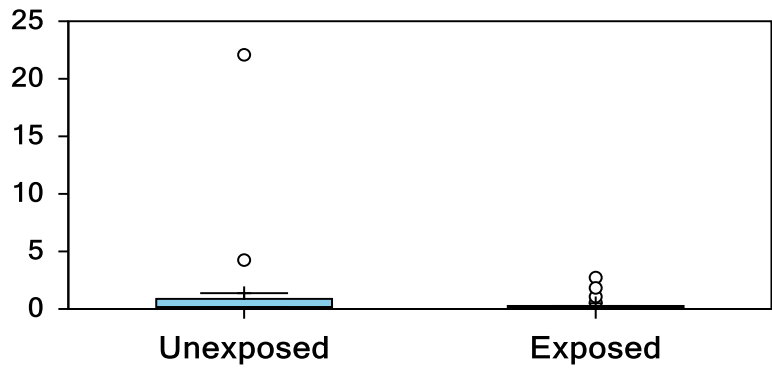

**bilirubin (E,Z or Z,E)\***

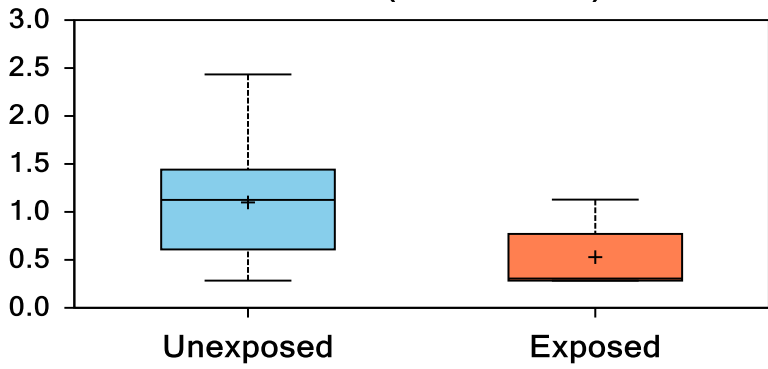

### adenosine 5'diphosphoribose

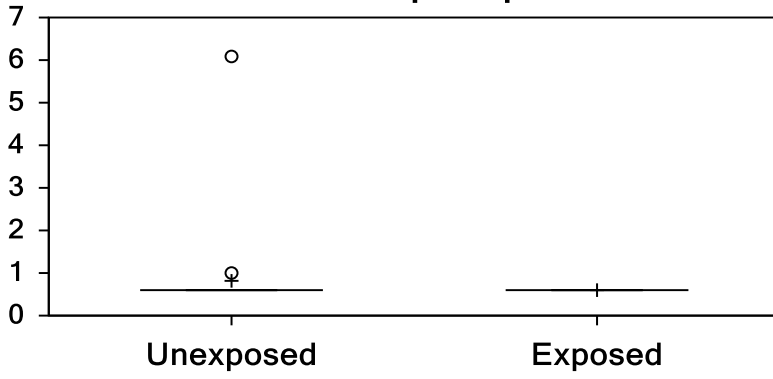

### N1-Methyl-2-pyridone-5-carboxamide

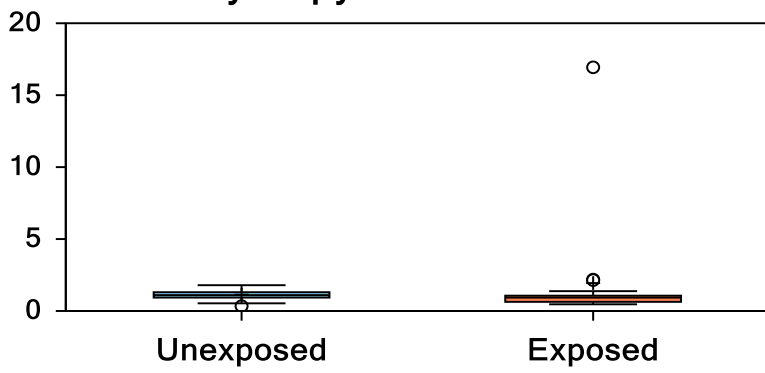

### riboflavin (Vitamin B2)

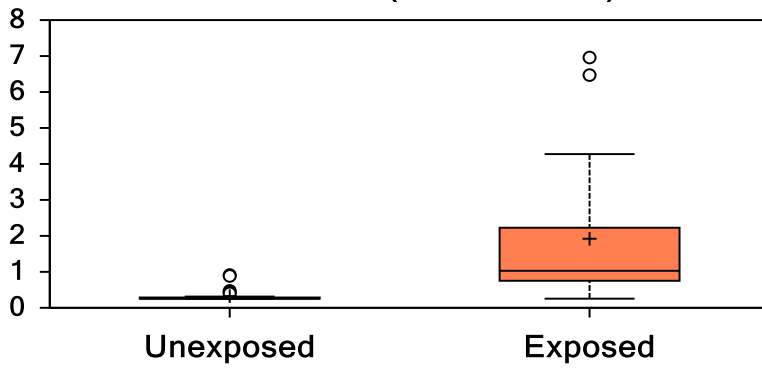

**gamma-CEHC**

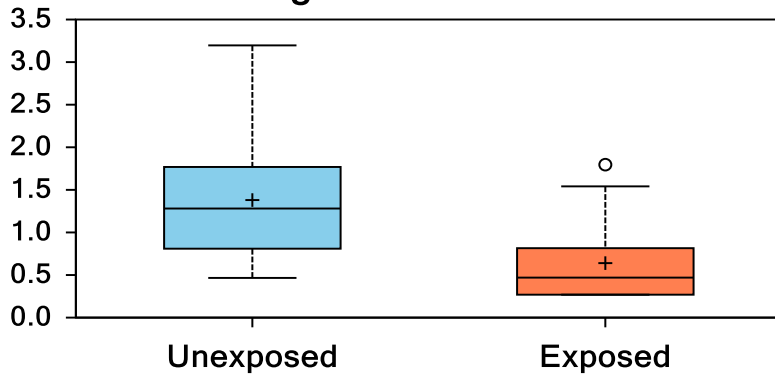

**hippurate**

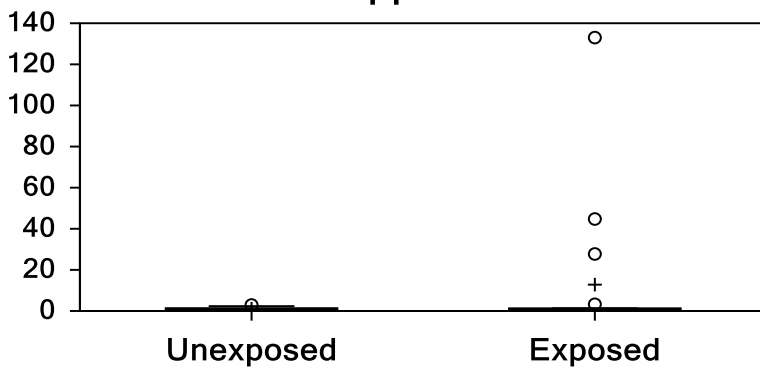

**3-hydroxyhippurate**

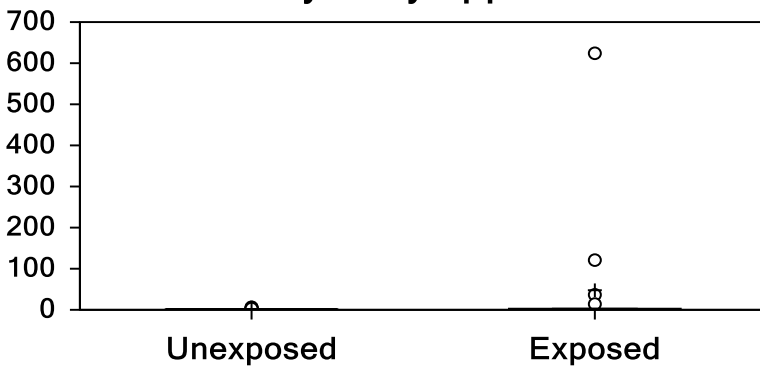

### catechol sulfate

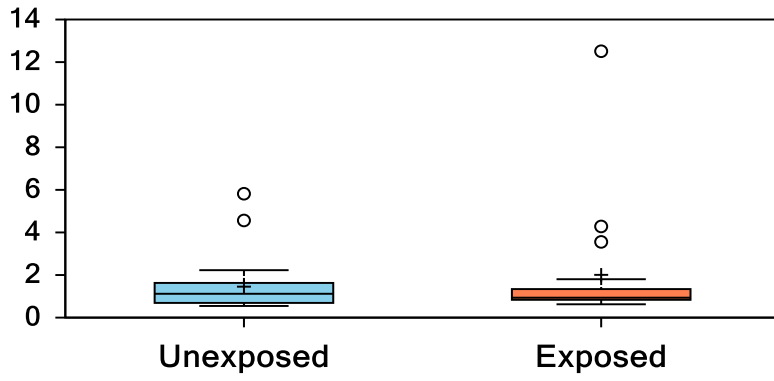

### benzamide

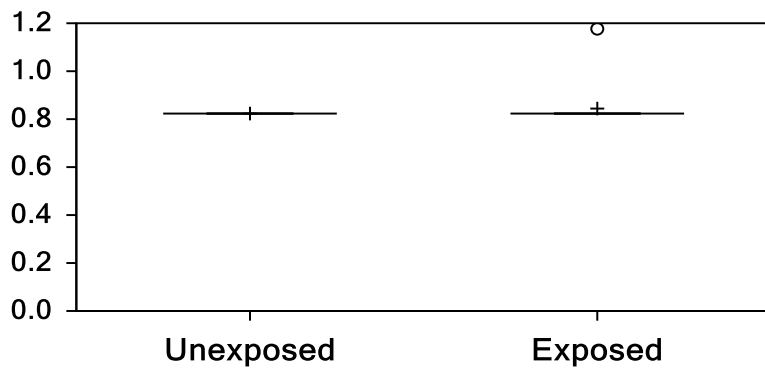

### 4-vinylphenol sulfate

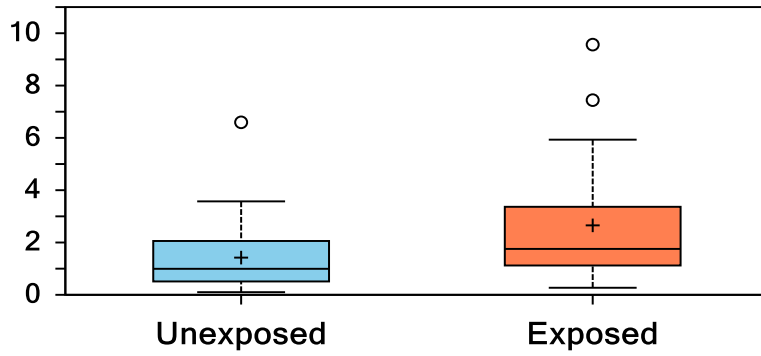



### triethanolamine

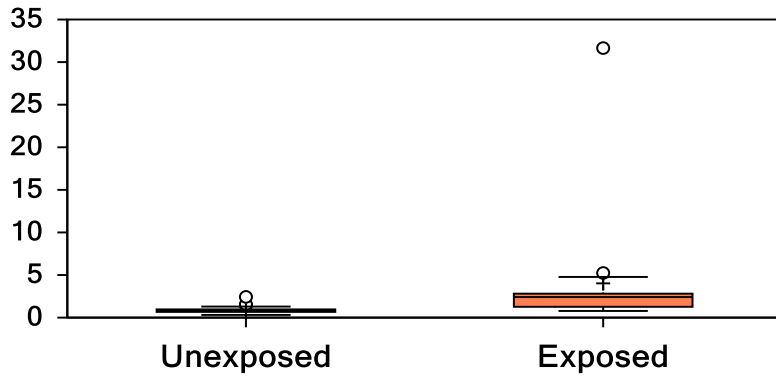

### 2-ethylhexanoate

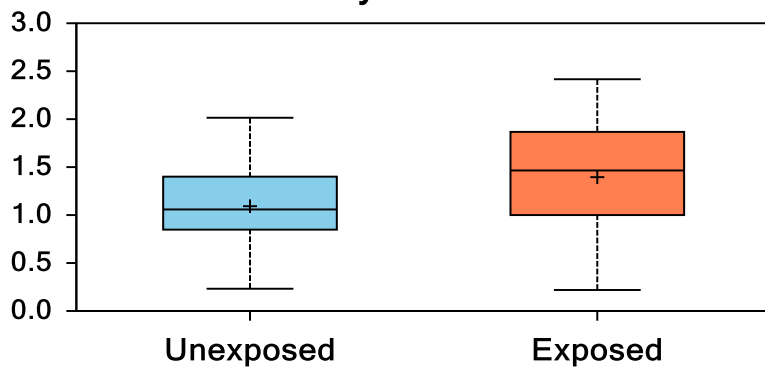

### Tetracycline\*

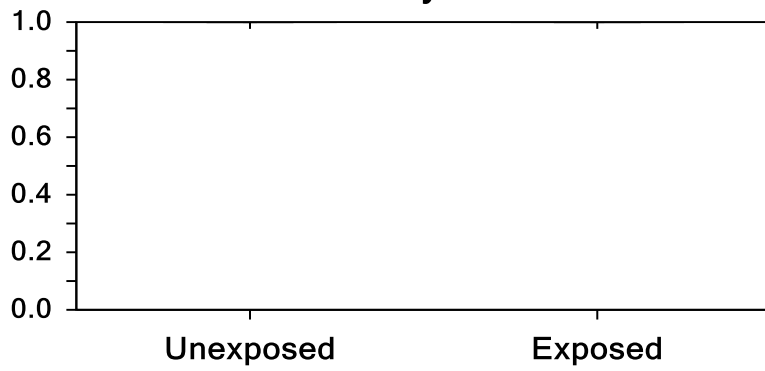

### 4-acetaminophen sulfate

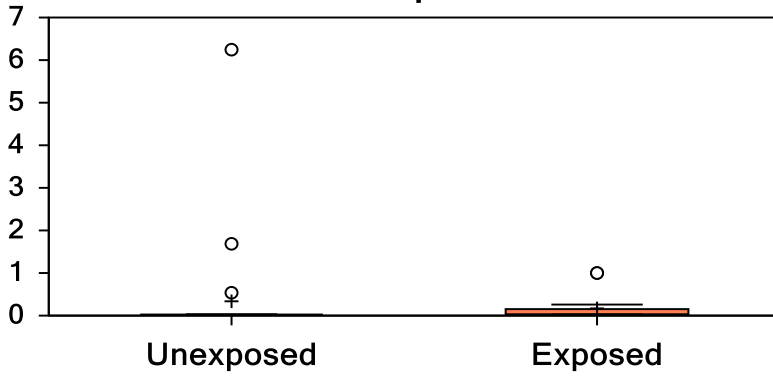

### 2-hydroxyacetaminophen sulfate\*

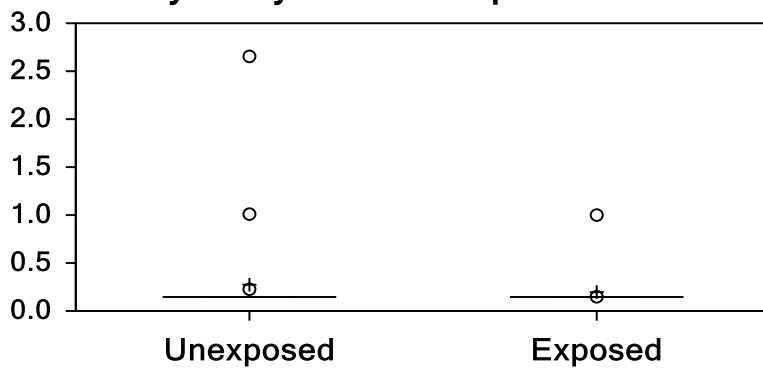

### 4-acetylphenol sulfate

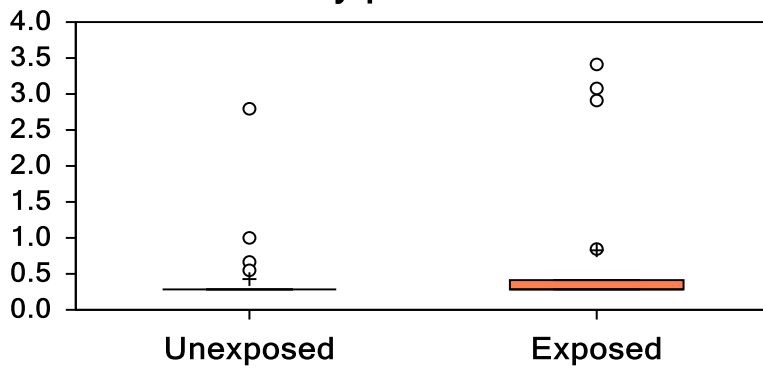

### desmethylnaproxen sulfate\*

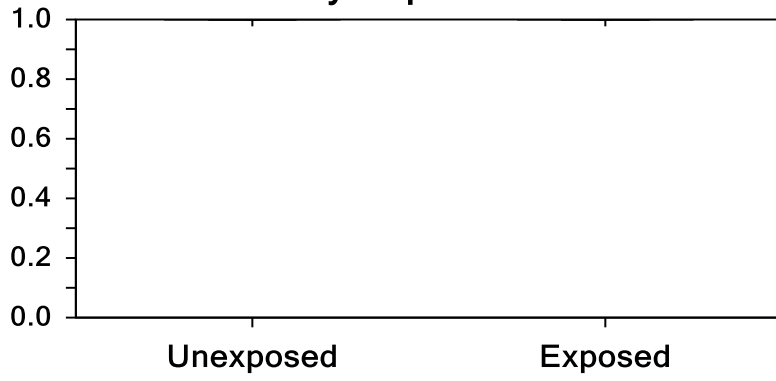

### metformin

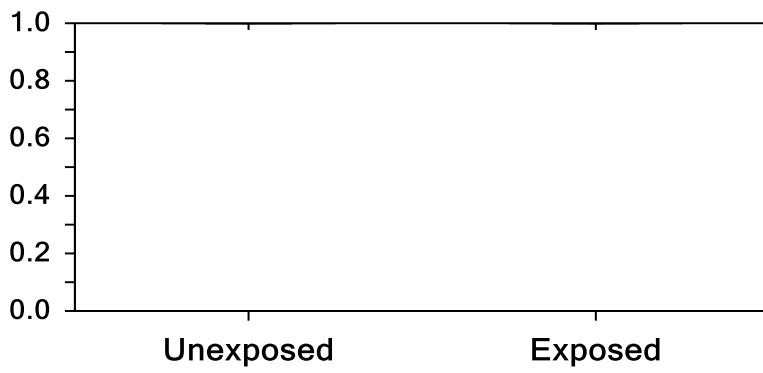

### hydroquinone sulfate

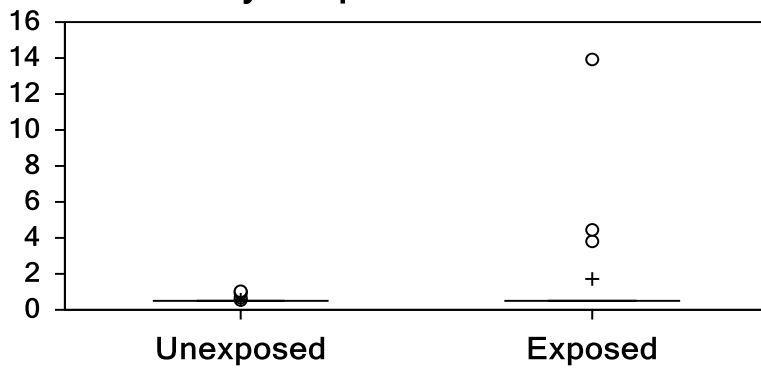

### diphenhydramine

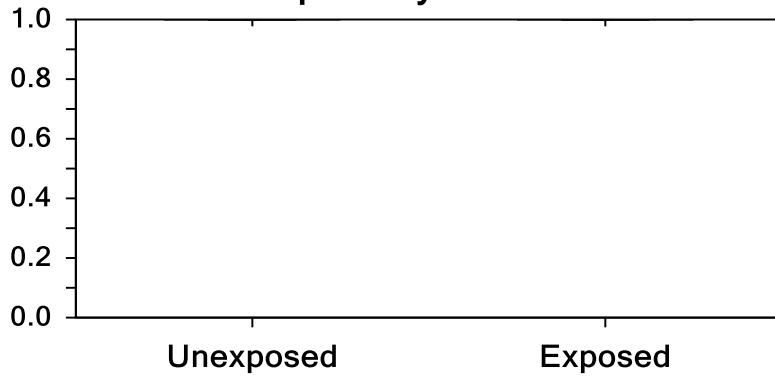

### hydrochlorothiazide

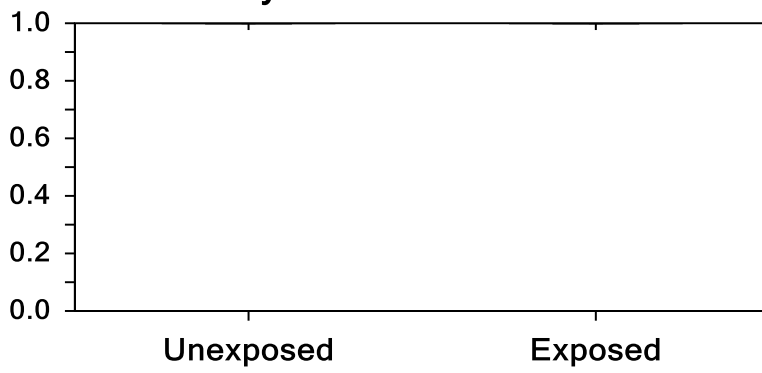

### vancomycin

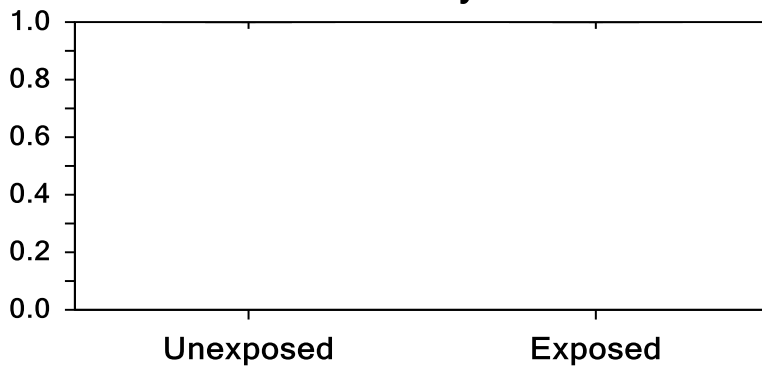

### saccharin

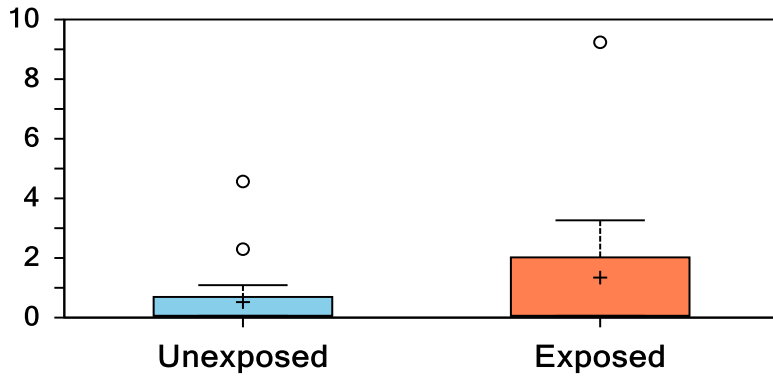

### piperine

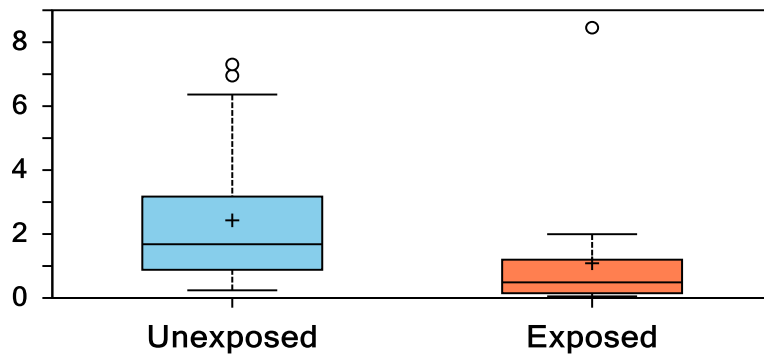

### ergothioneine

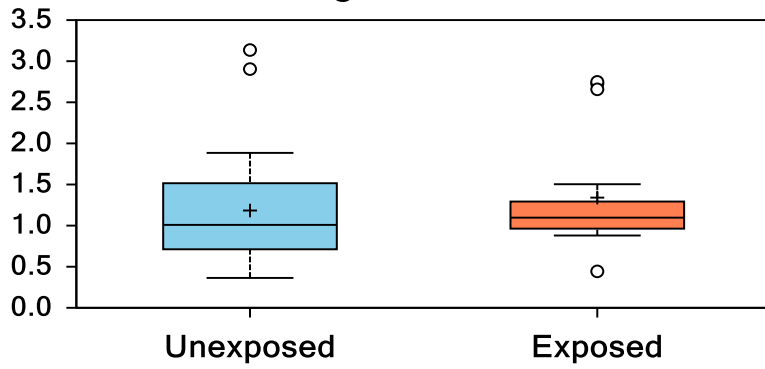

### stachydrine

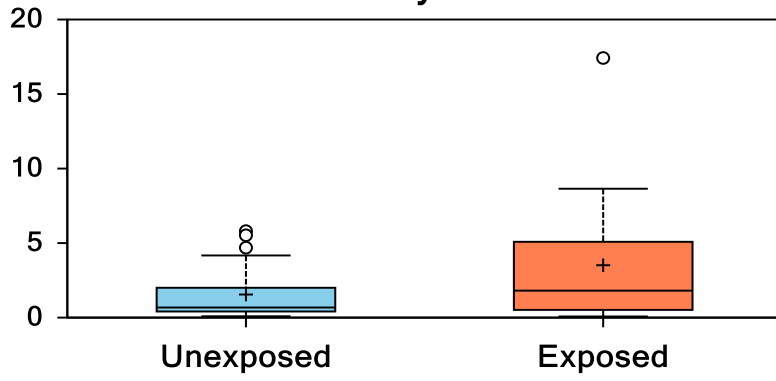

### vanillin

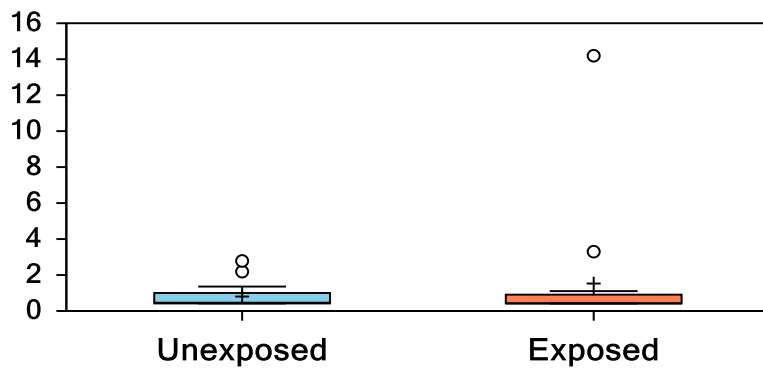

### linamarin

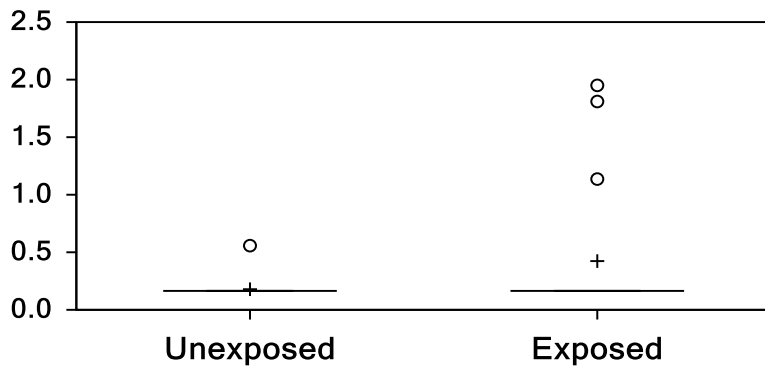

### theobromine

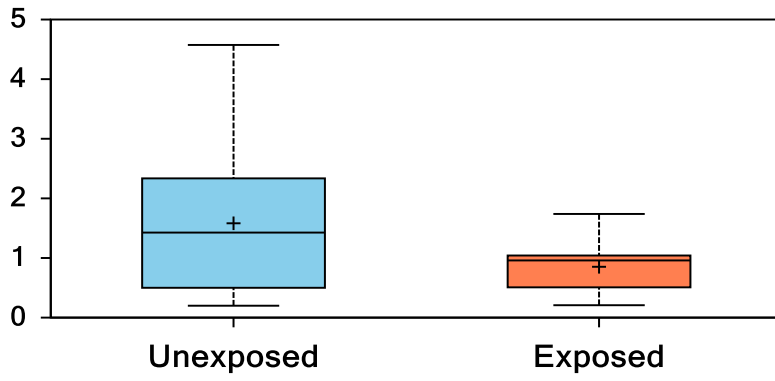

### 7-methylxanthine

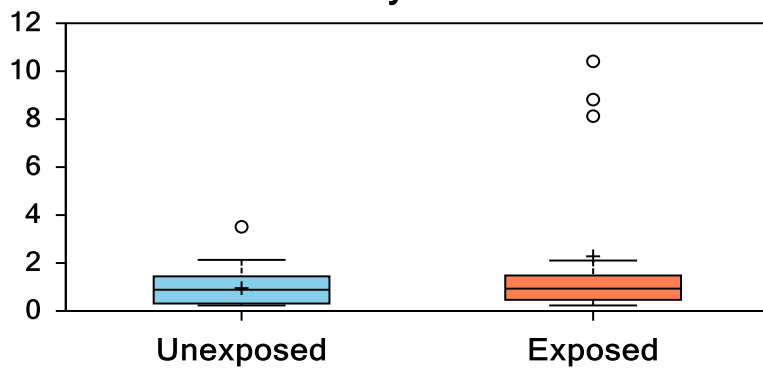

### hydroxycotinine

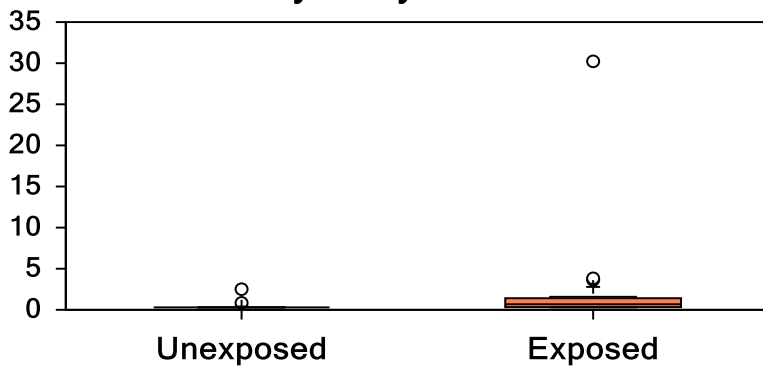

### phthalic acid

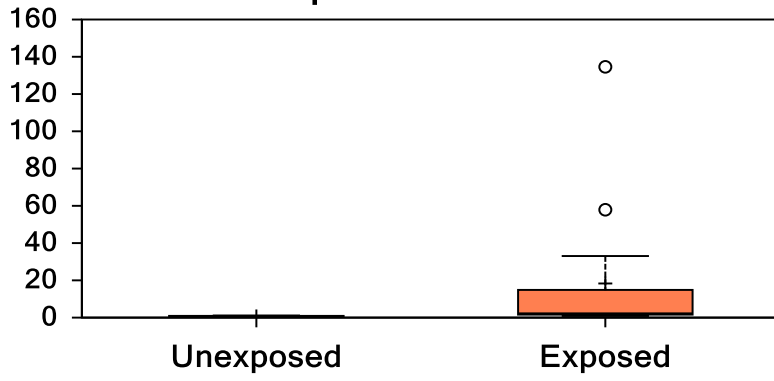

### X - 16124

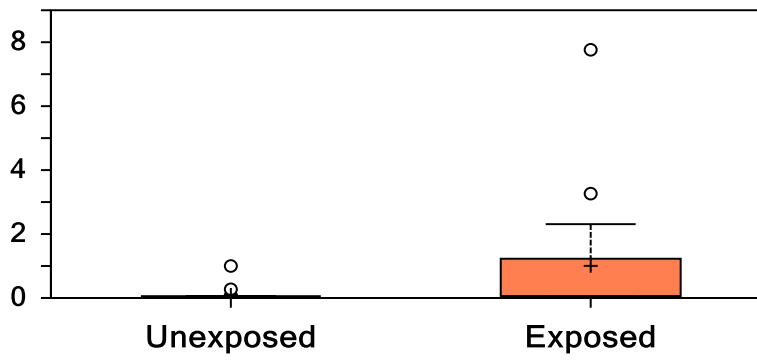

### X - 16089

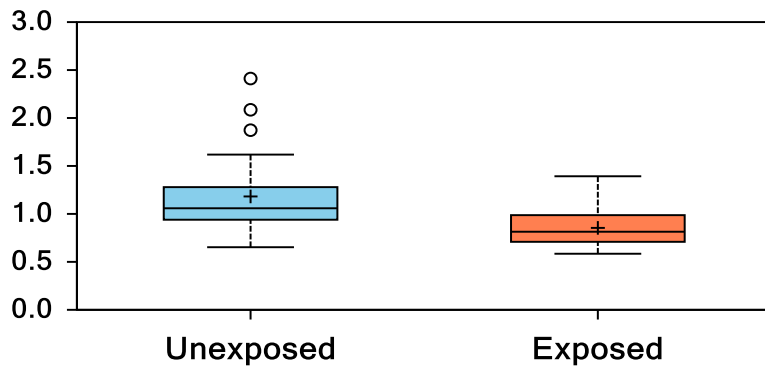



X - 16103

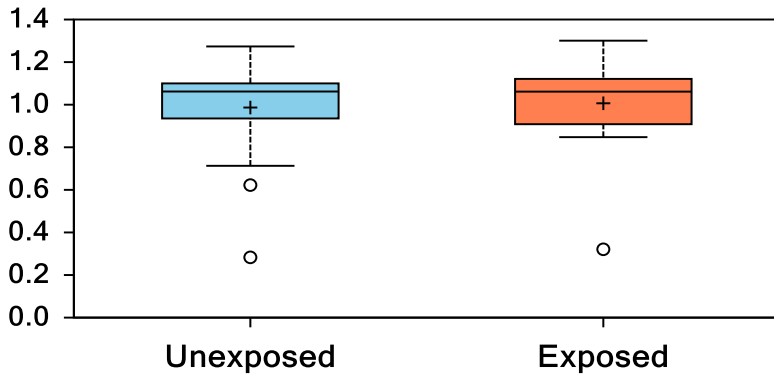

X - 16133

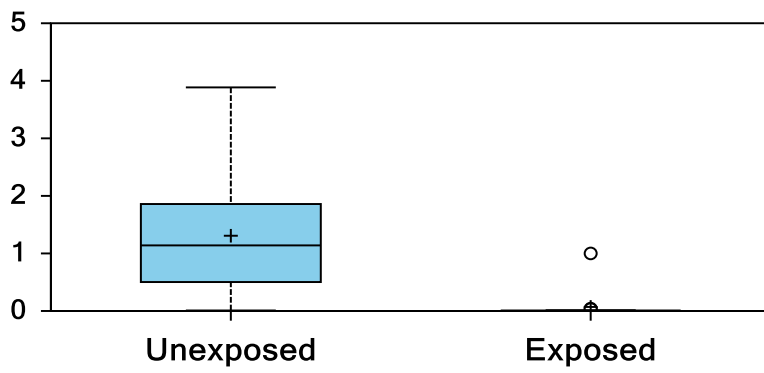

X - 16128

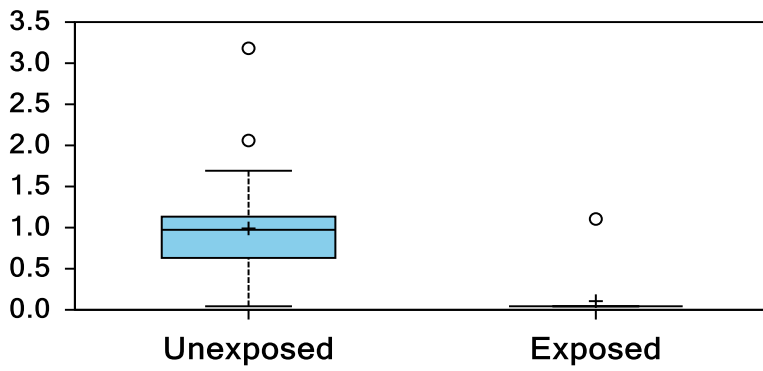

X - 15735

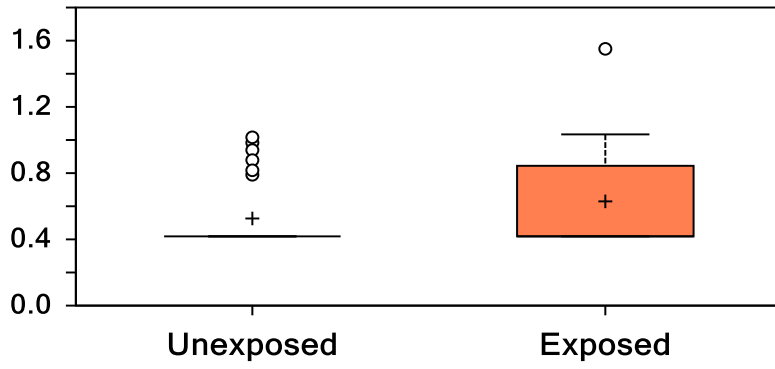

X - 15737

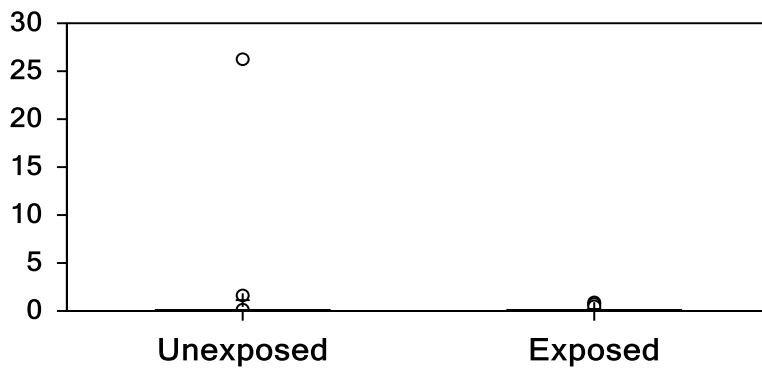

X - 15728

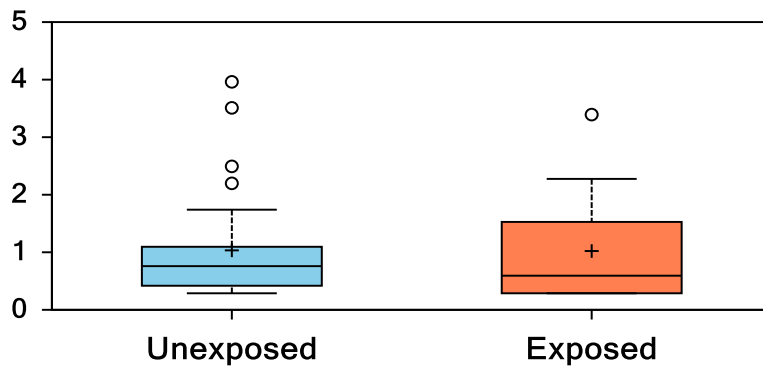

X - 16033

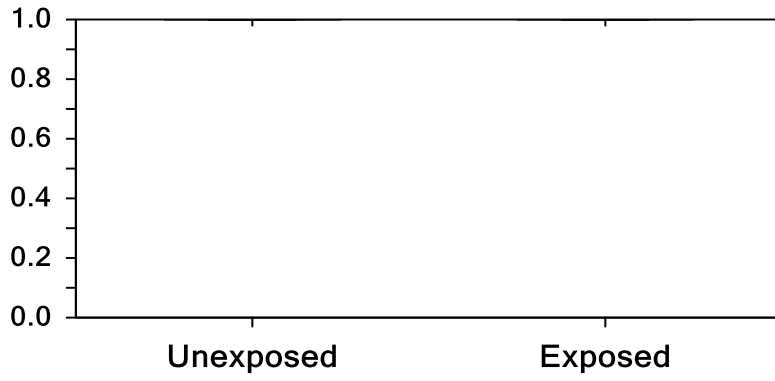

X - 15845

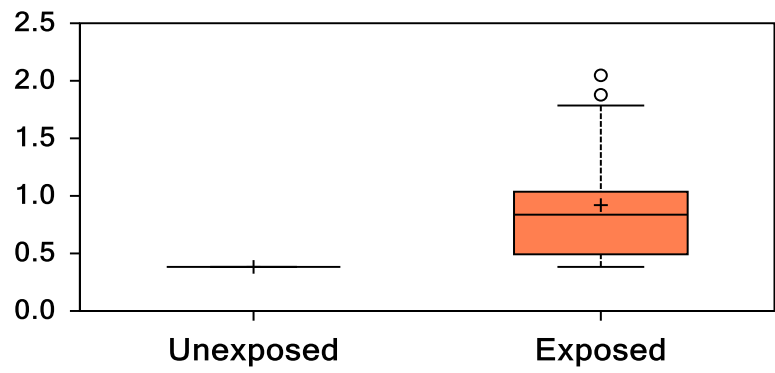

X - 15861

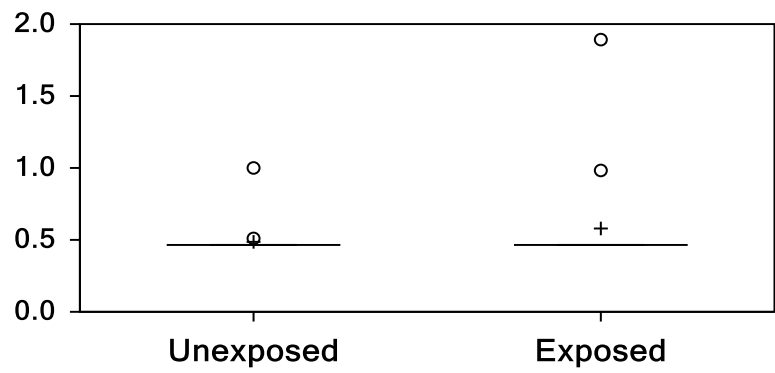

X - 16475

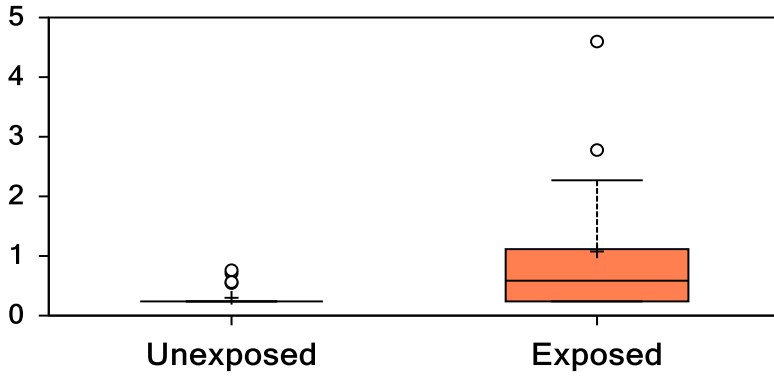

X - 16439

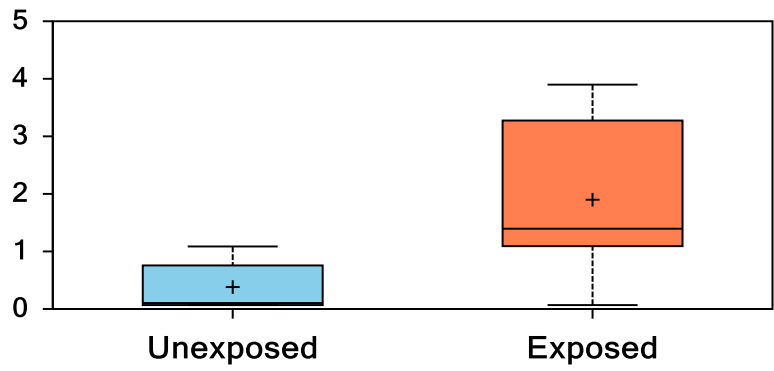

X - 16581

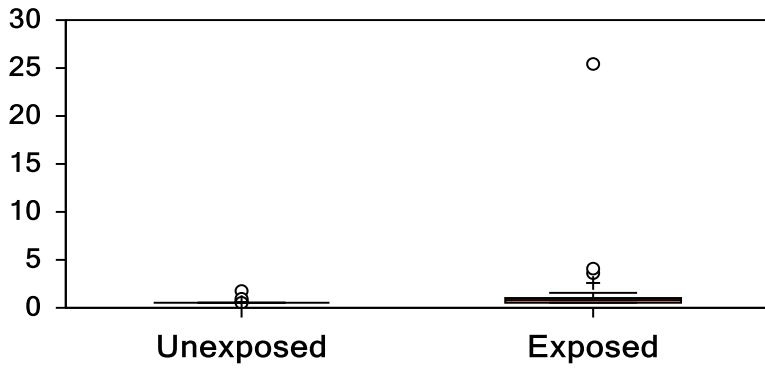

X - 16626

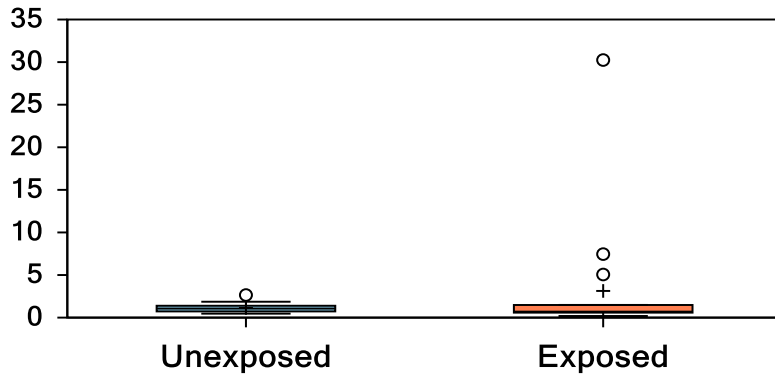

X - 16576

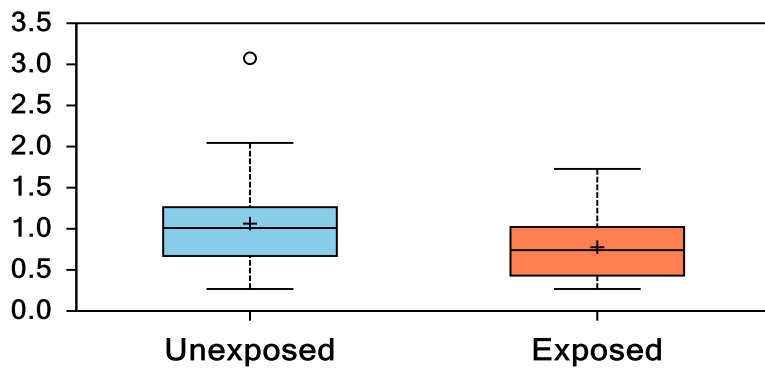

X - 16207

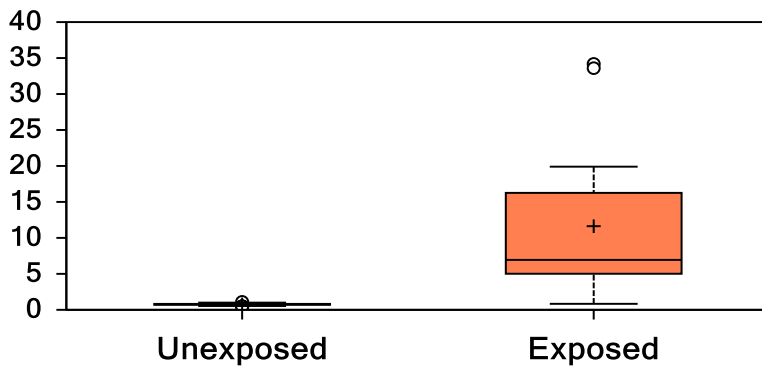

X - 16136

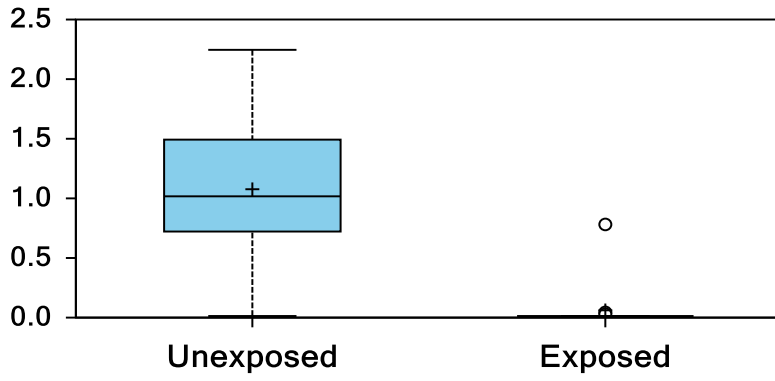

X - 16137

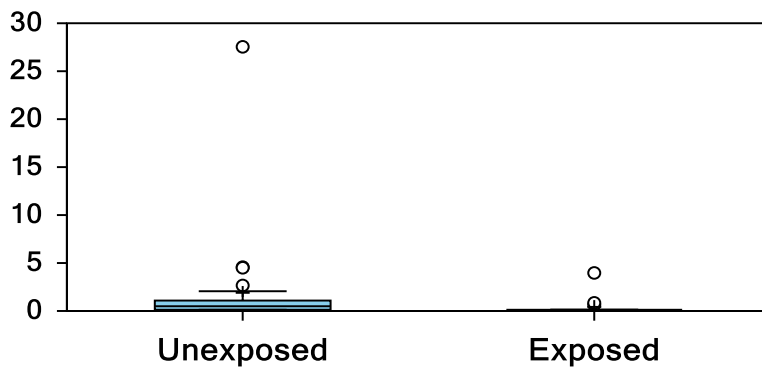

X - 16397

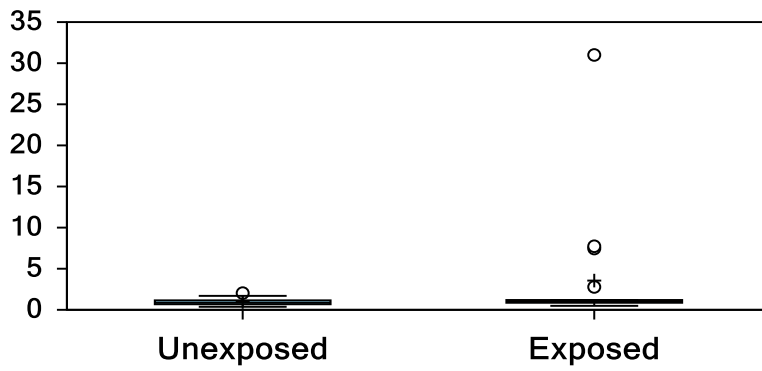

X - 16296

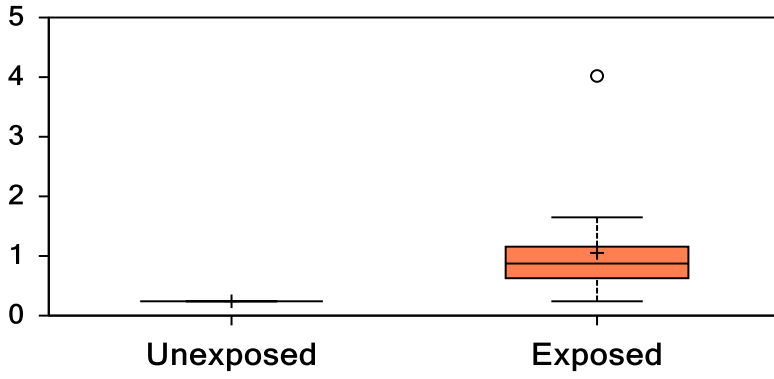

X - 15689

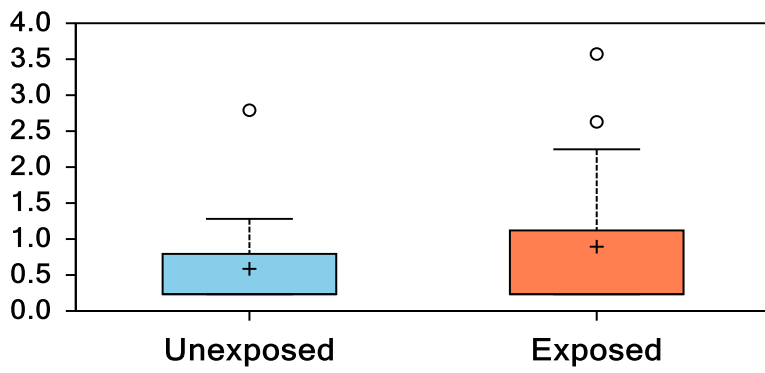

X - 14473

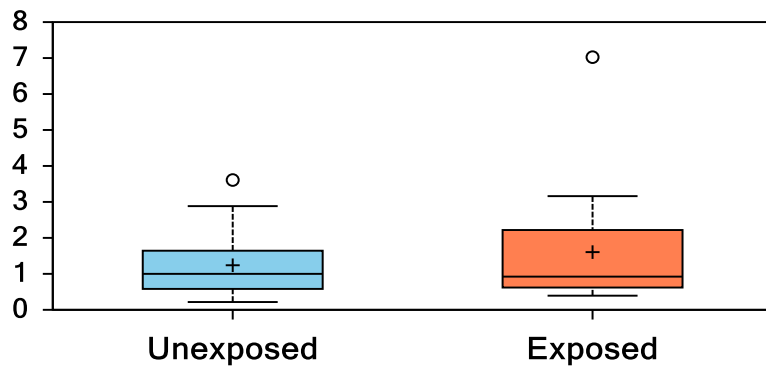

X - 14364

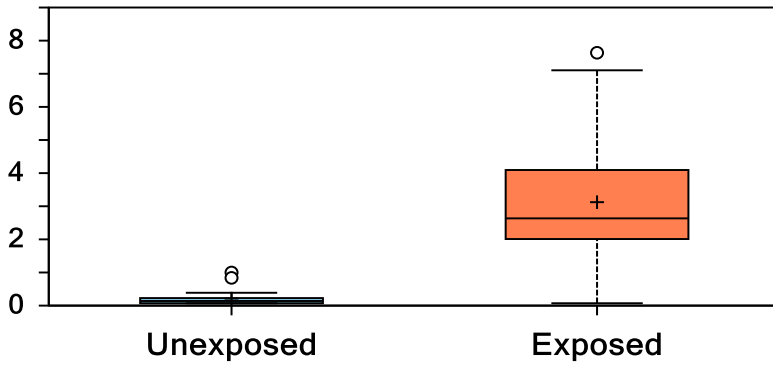

X - 14620

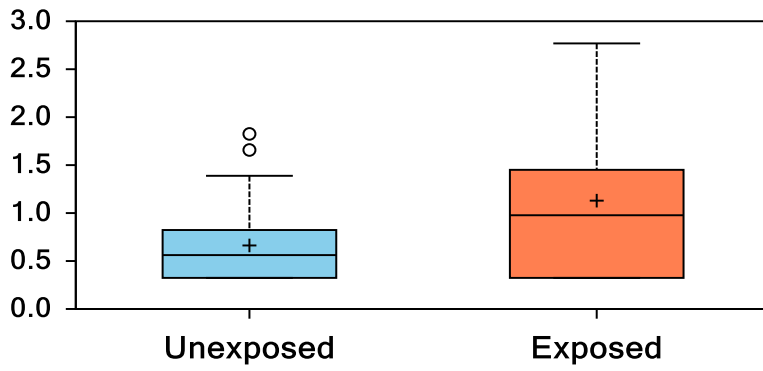

X - 14626

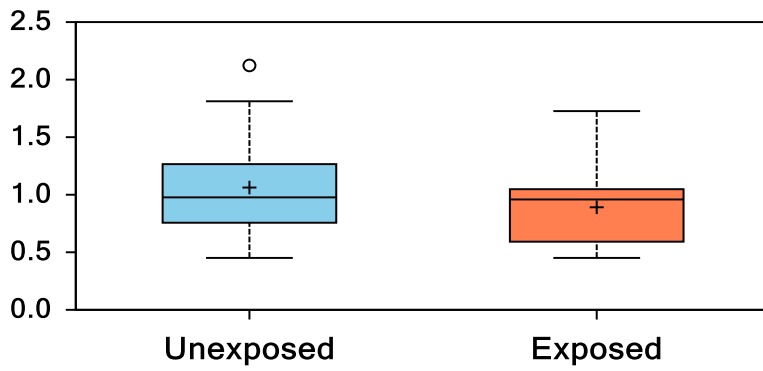



X - 14588

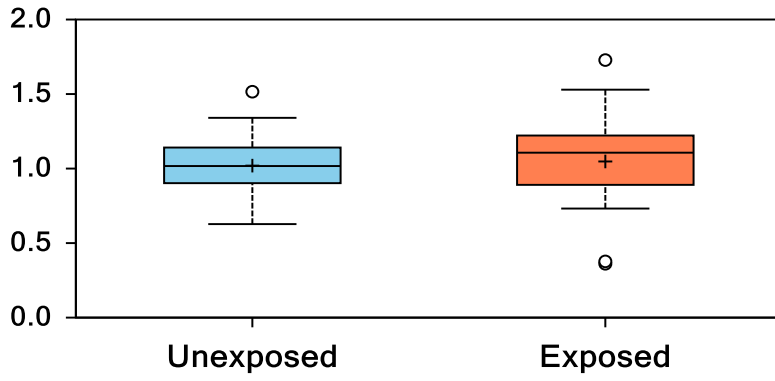

X - 14213

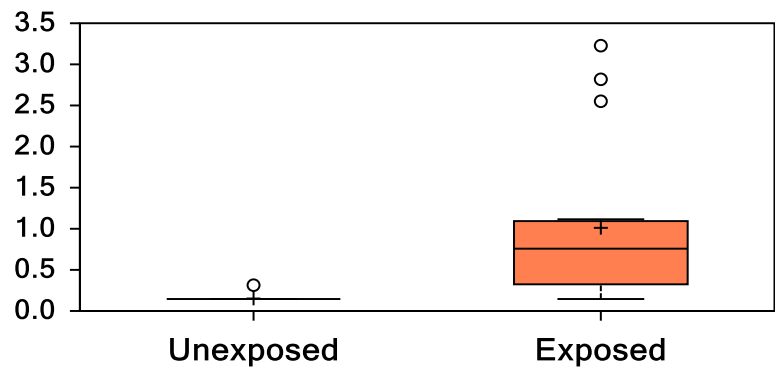

X - 14195

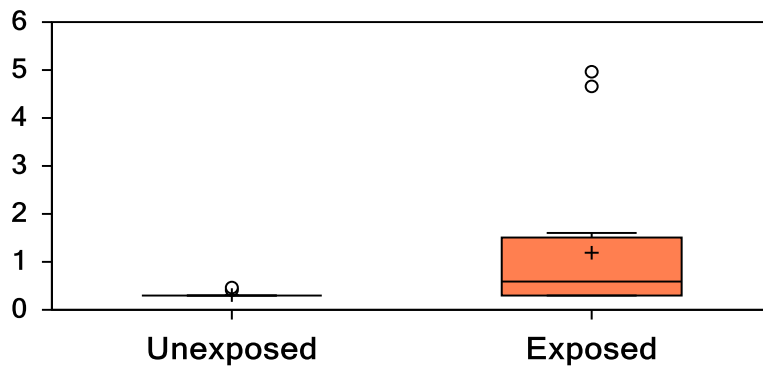

X - 14196

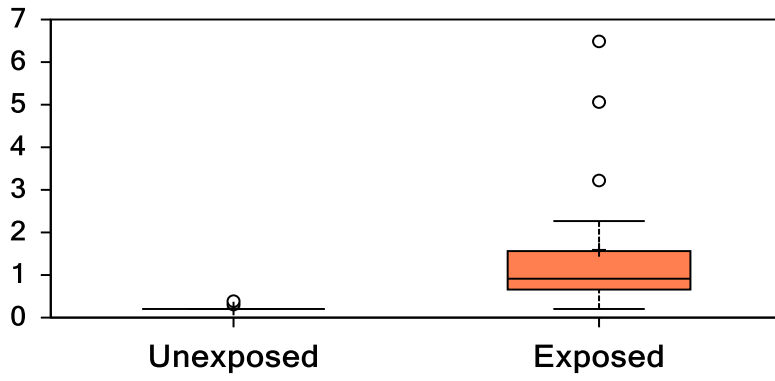

X - 14363

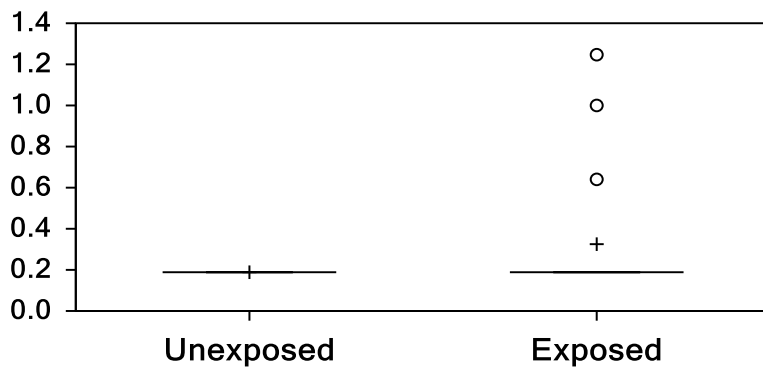

X - 14256

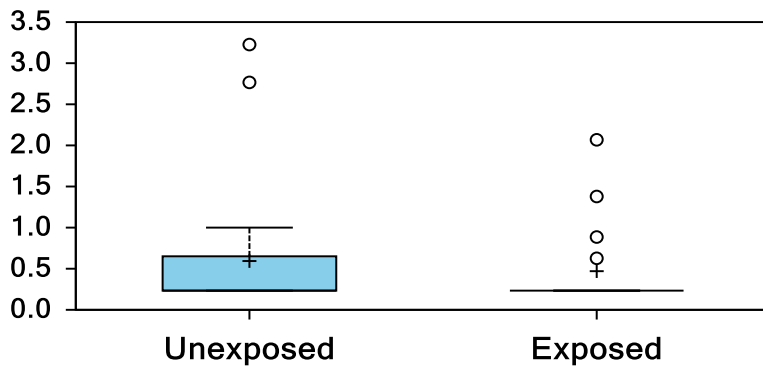

X - 15559

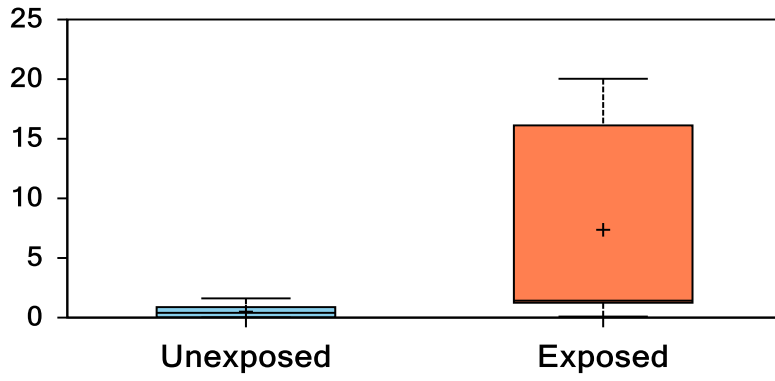

X - 15562

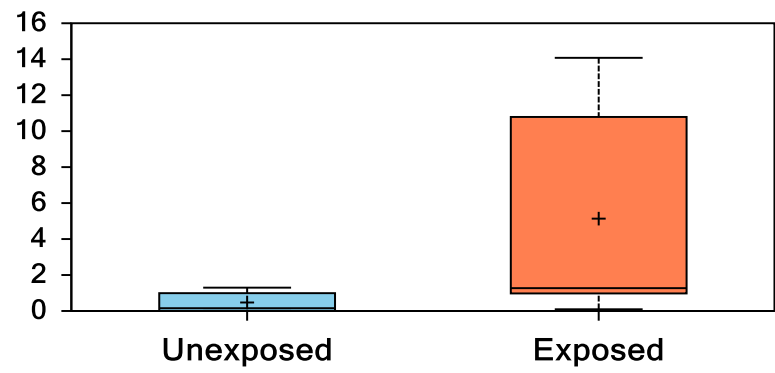

X - 15523

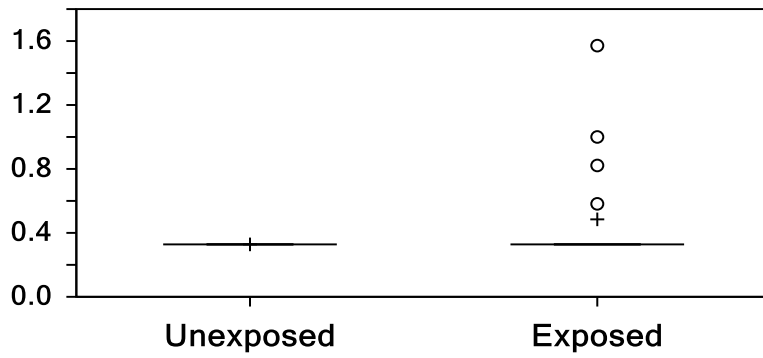

X - 15664

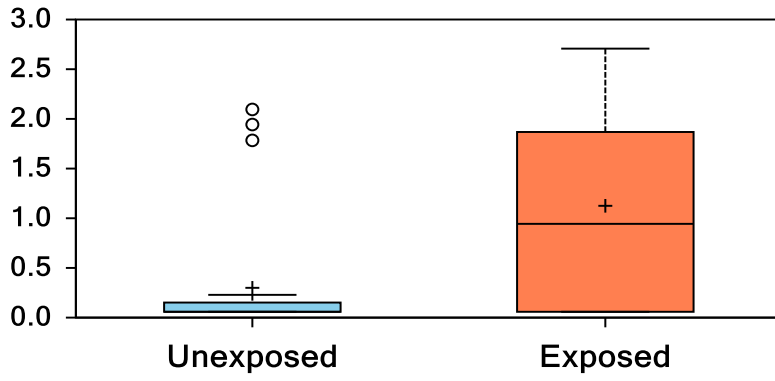

X - 15634

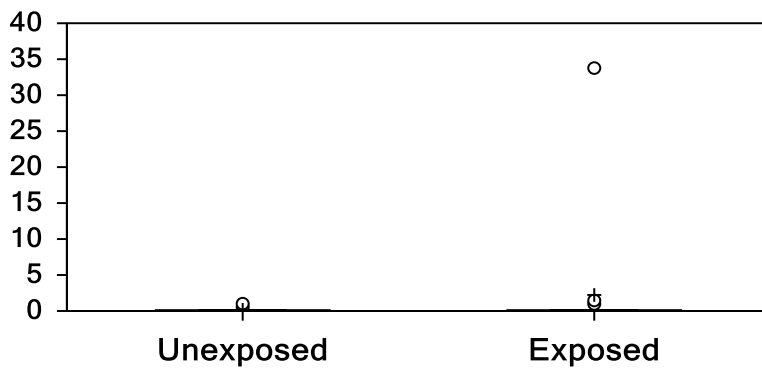

X - 15636

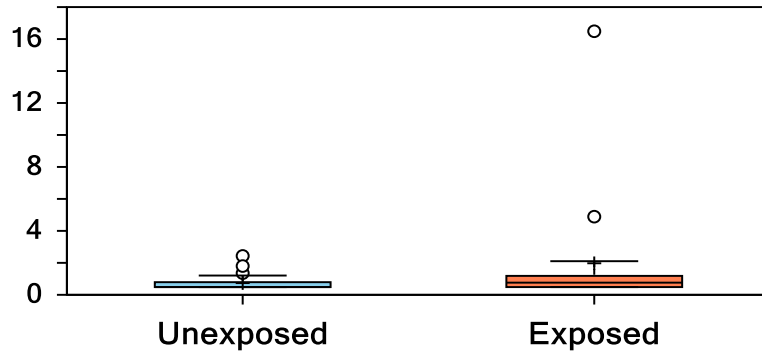

X - 15168

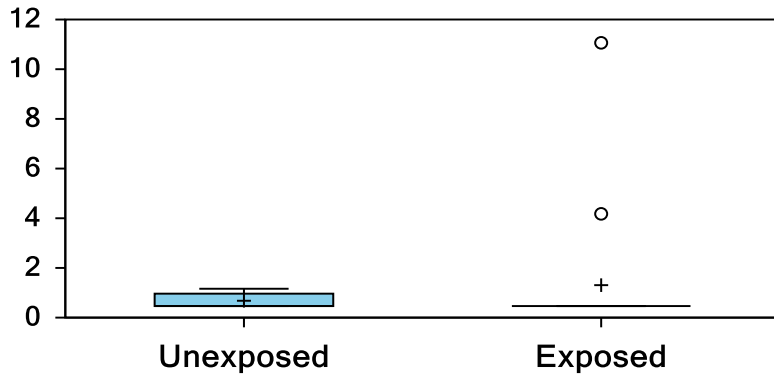

X - 14662

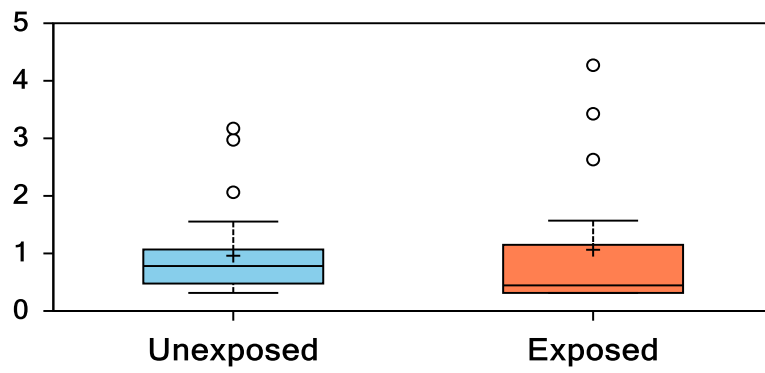

X - 15461

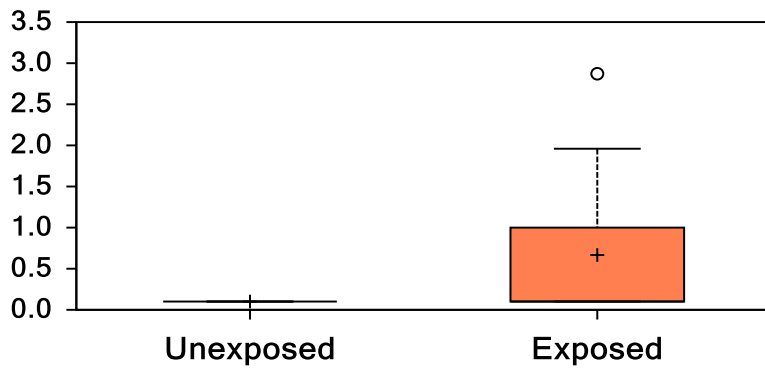

X - 15472

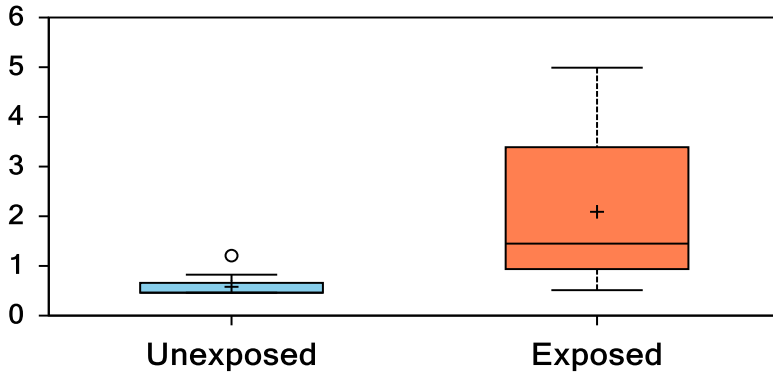

X - 15375

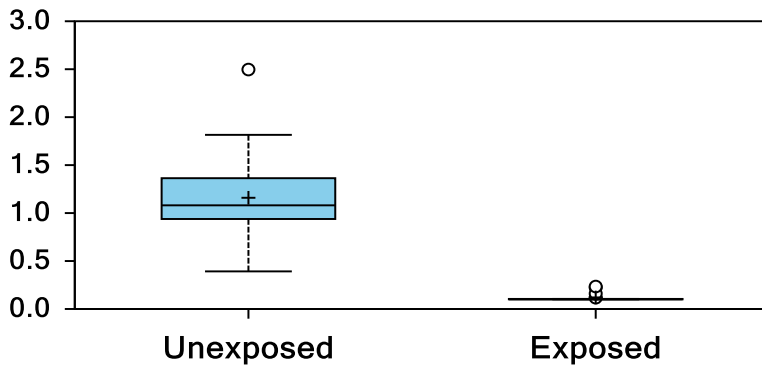

X - 17457

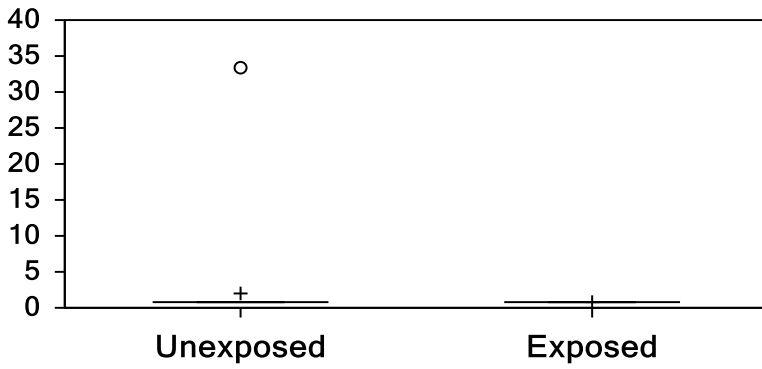

X - 17445

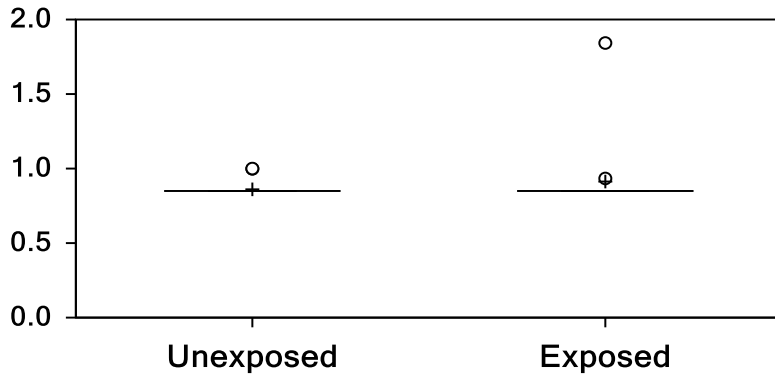

X - 17447

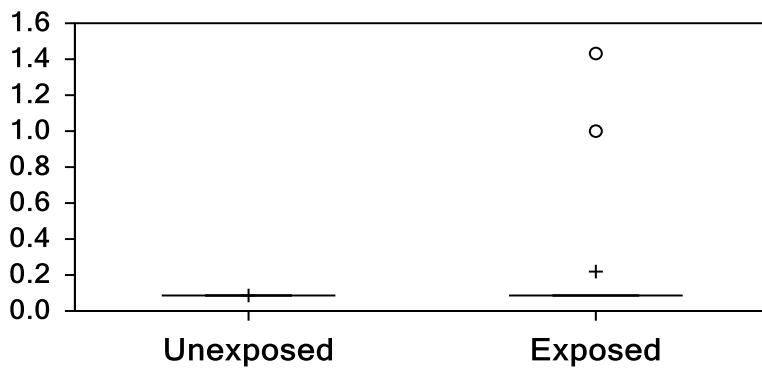

X - 17655

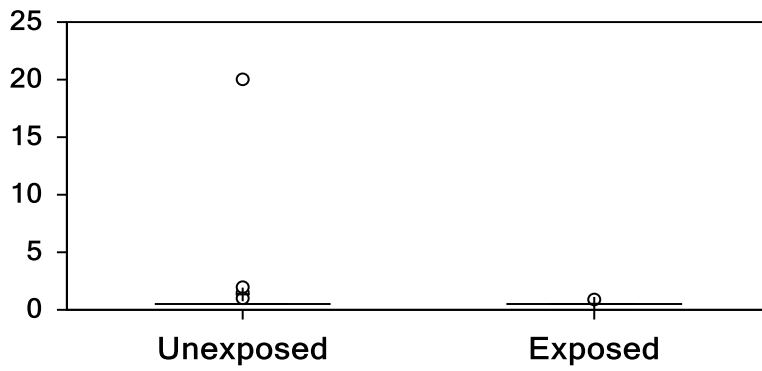

X - 17502

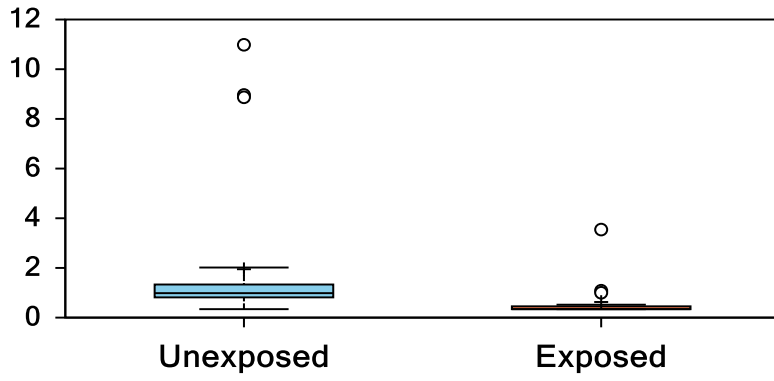

X - 17350

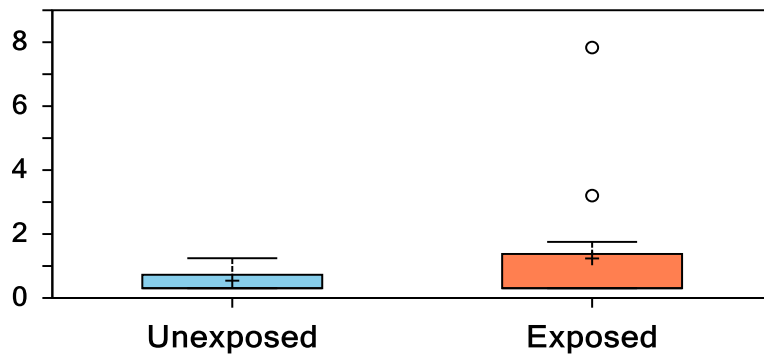

X - 17351

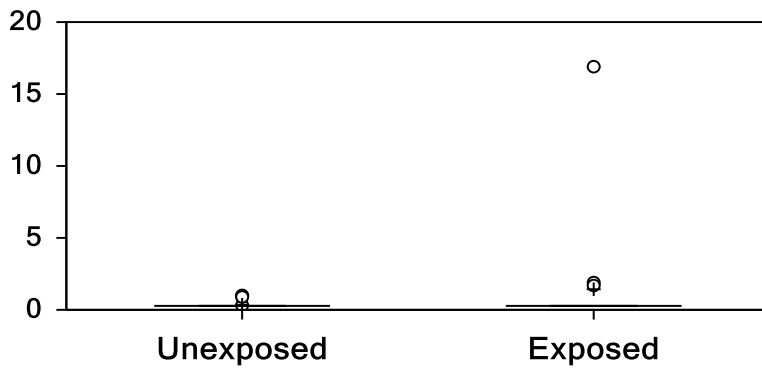



X - 17347

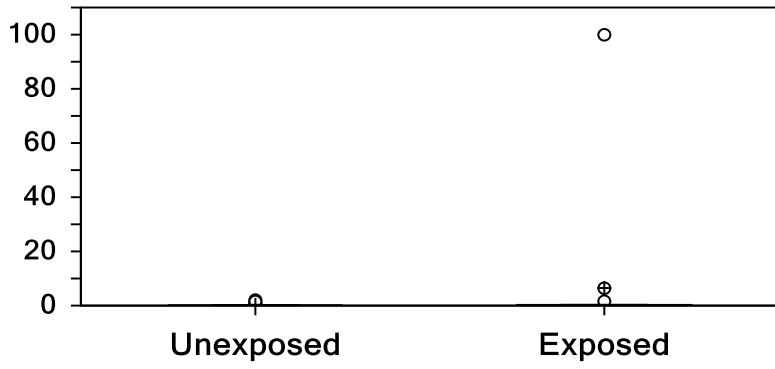

X - 17360

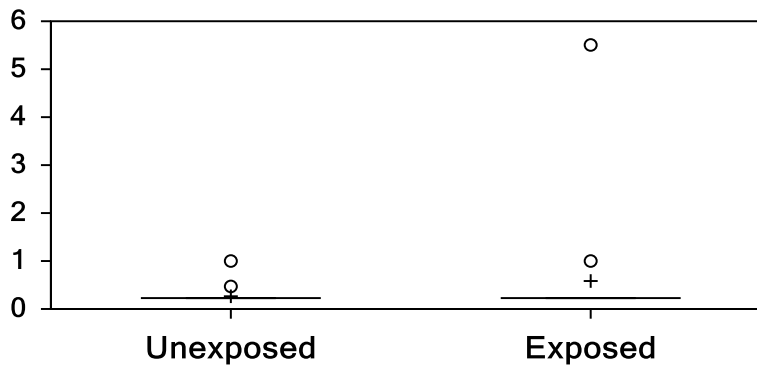

X - 17357

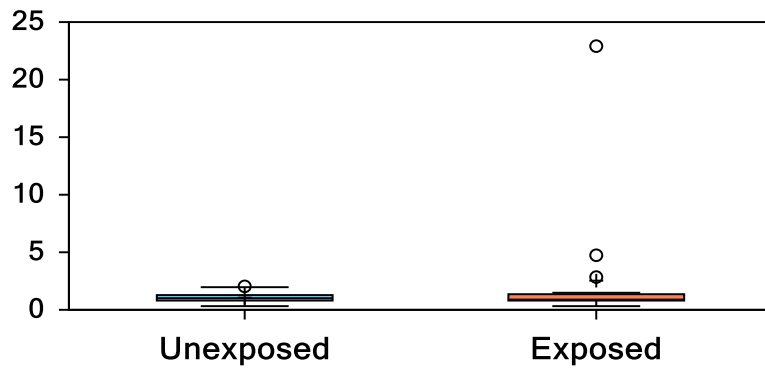

X - 17358

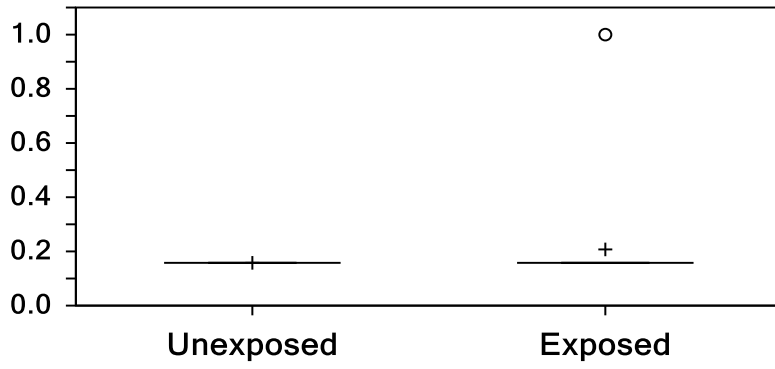

X - 18039

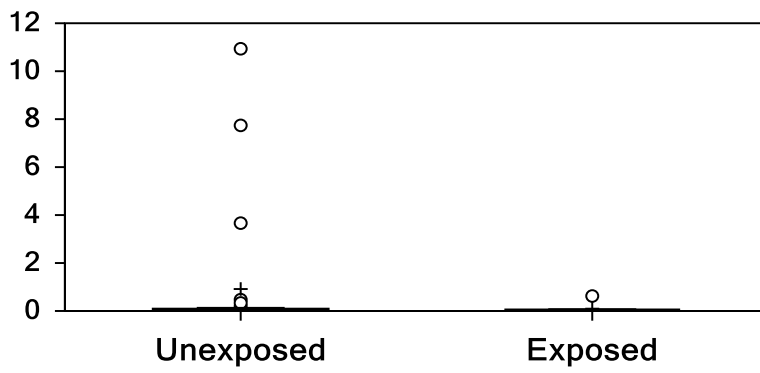

X - 17758

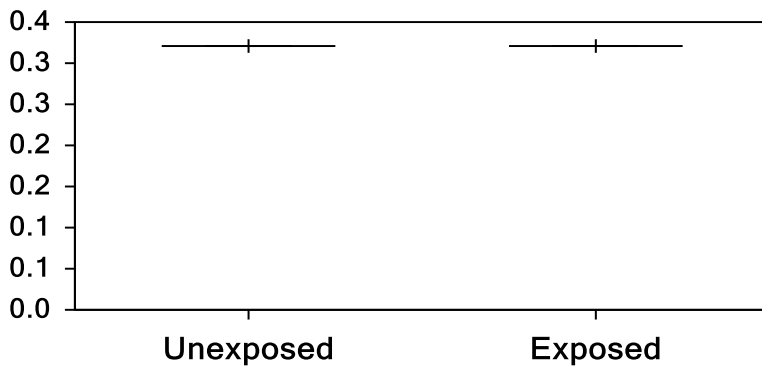

X - 18241

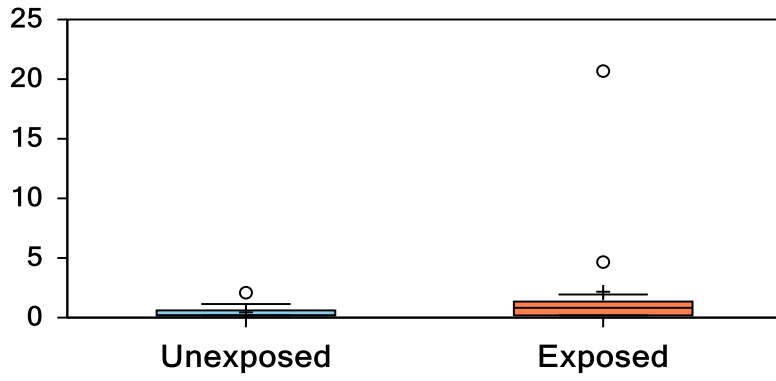

X - 18249

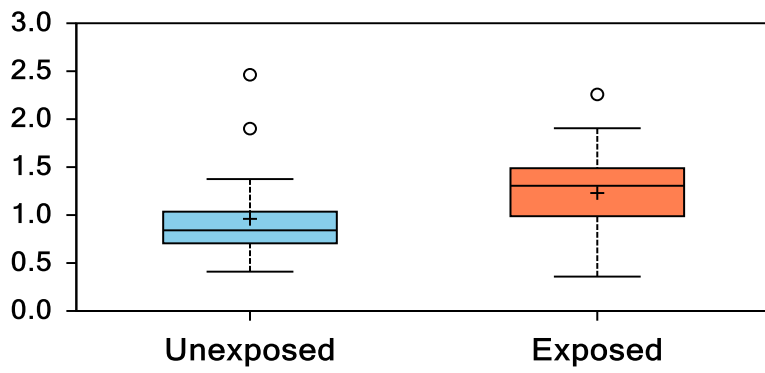

X - 18165

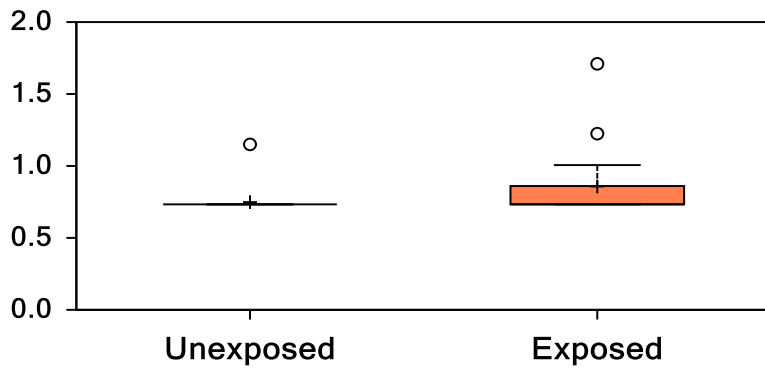

X - 17688

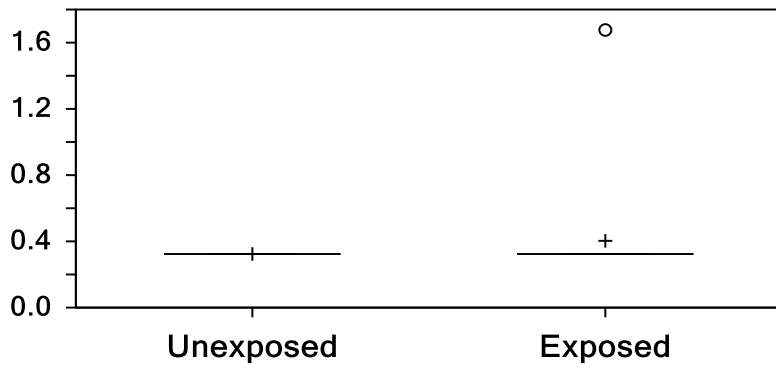

X - 17678

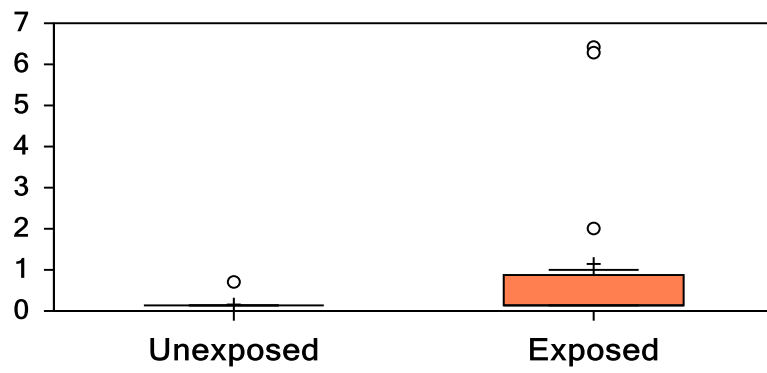

X - 17685

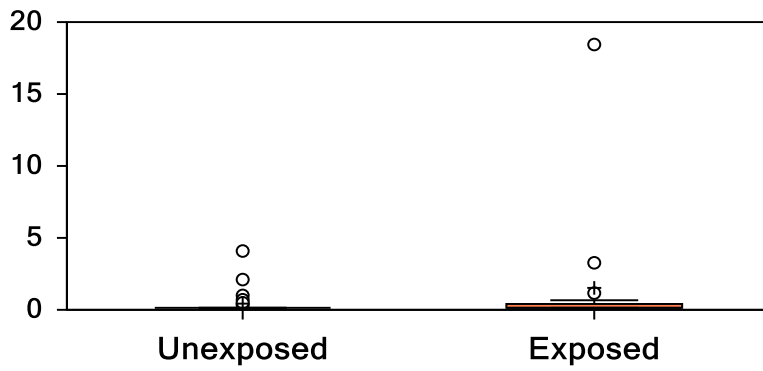

X - 17735

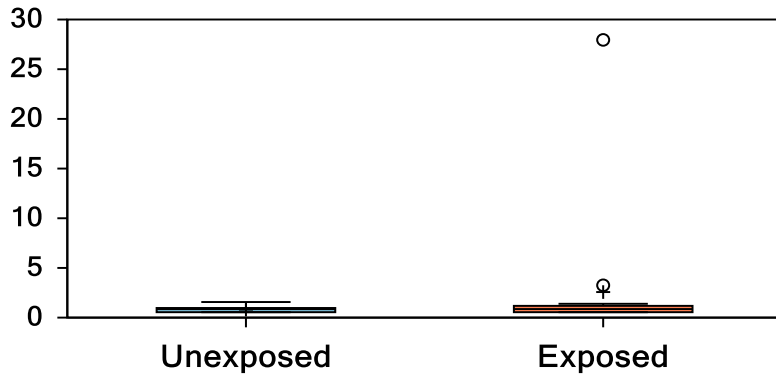

X - 17703

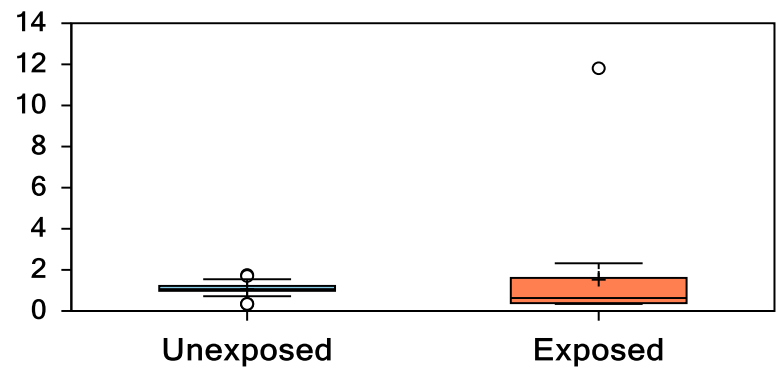

X - 17065

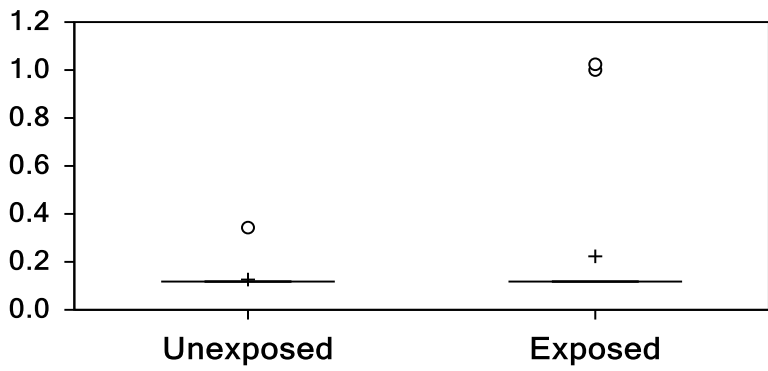

X - 17111

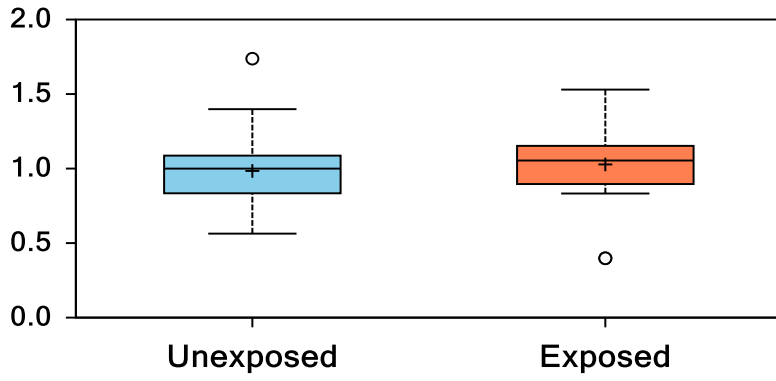

X - 17010

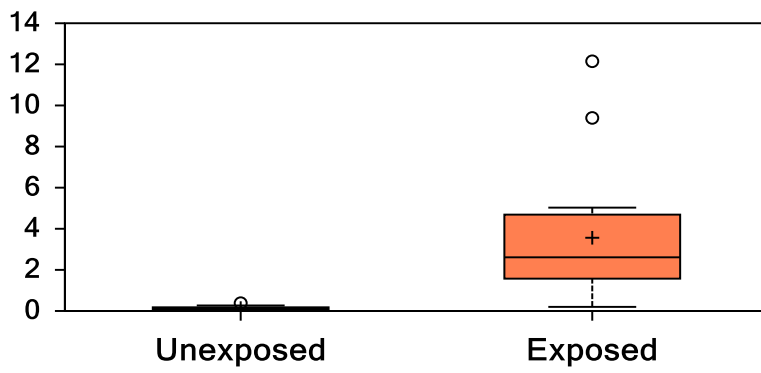

X - 17147

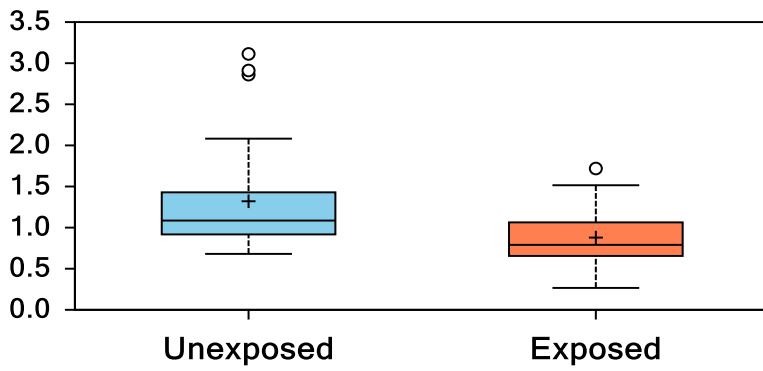

X - 17138

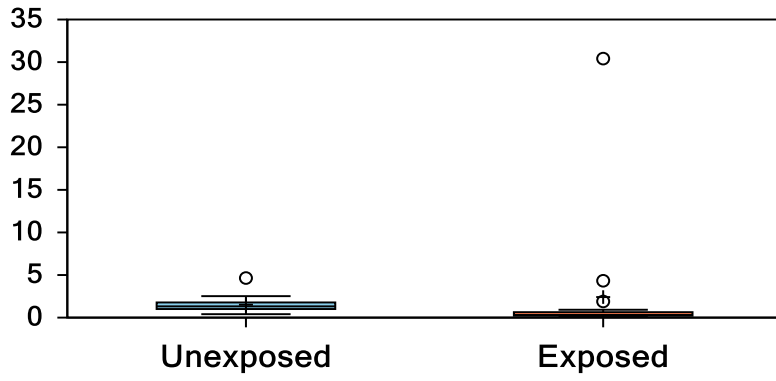

X - 17145

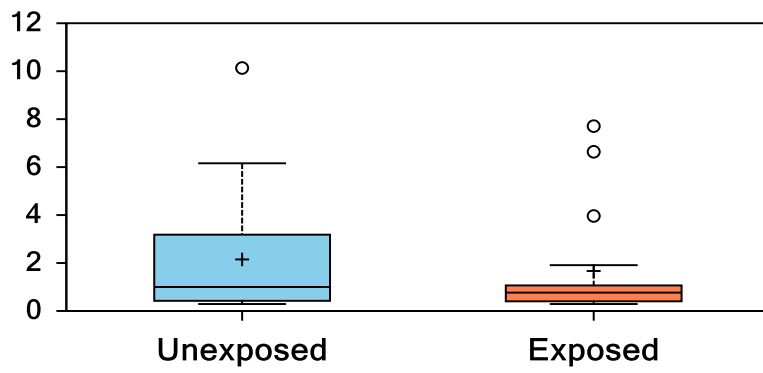

X - 16933

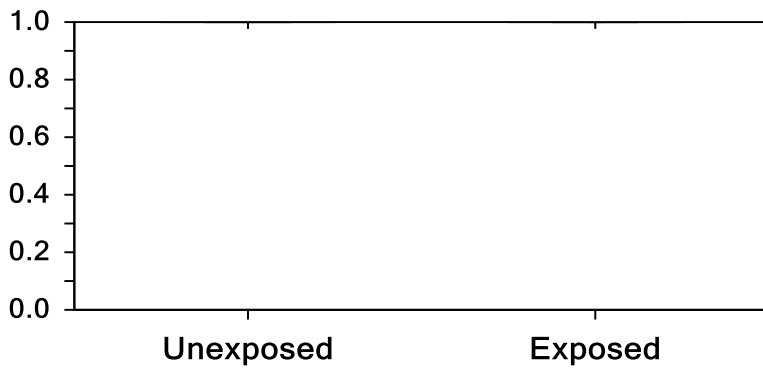

X - 16651

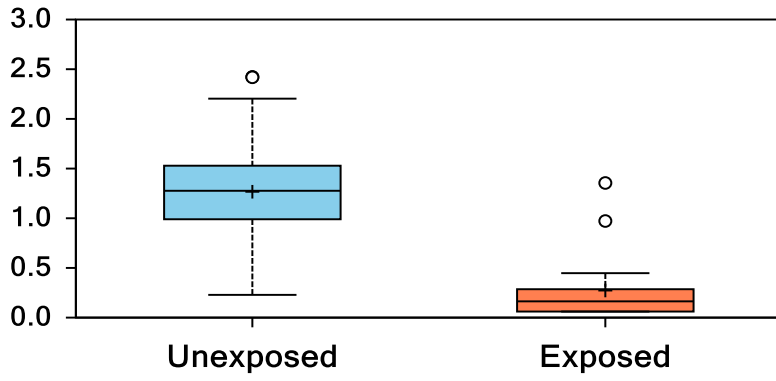

X - 16944

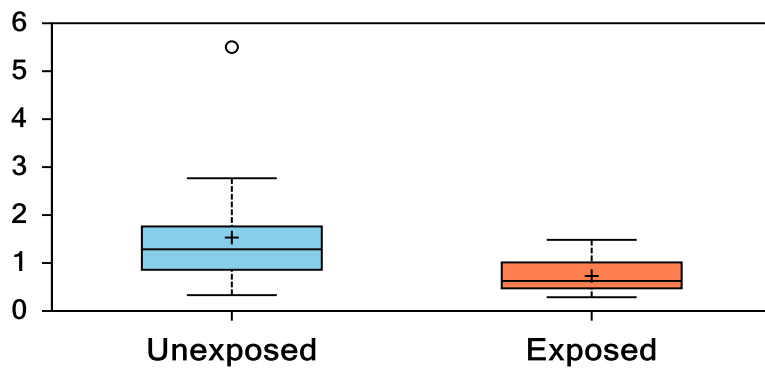

X - 16945

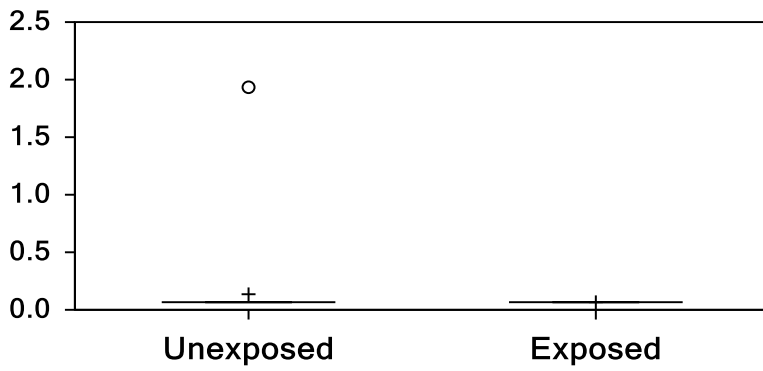



X - 16940

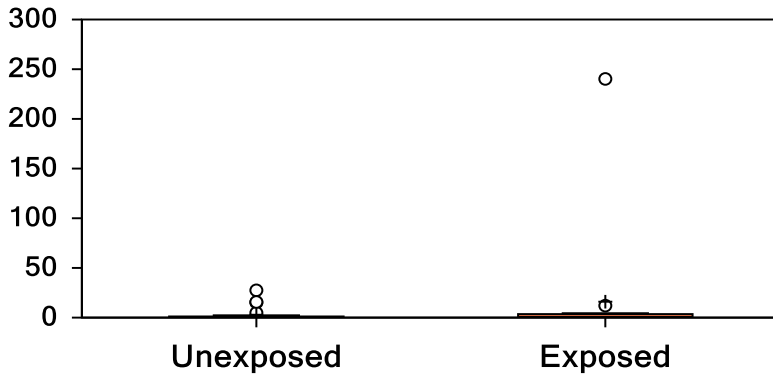

X - 17323

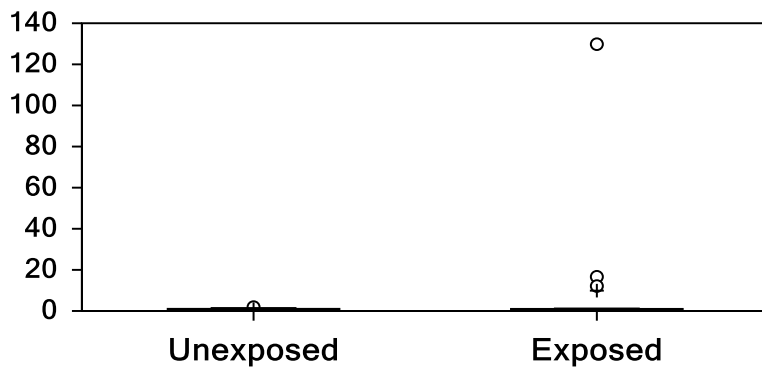

X - 17315

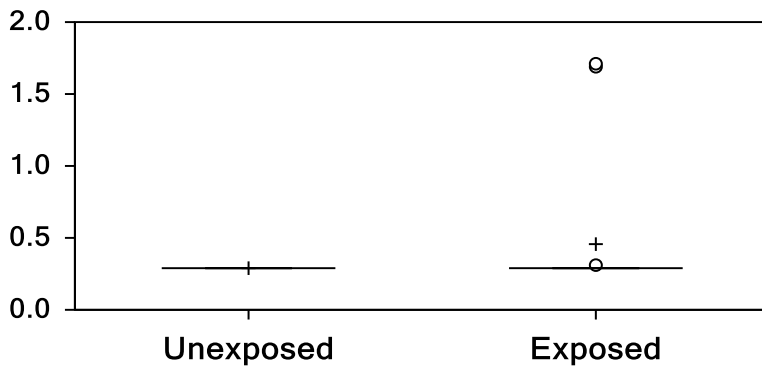

X - 17317

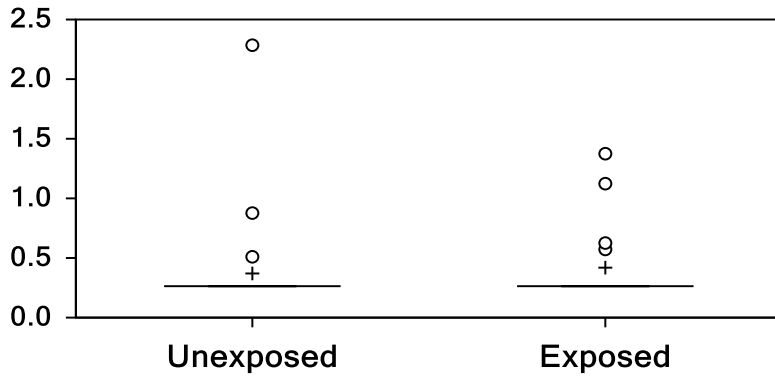

X - 17339

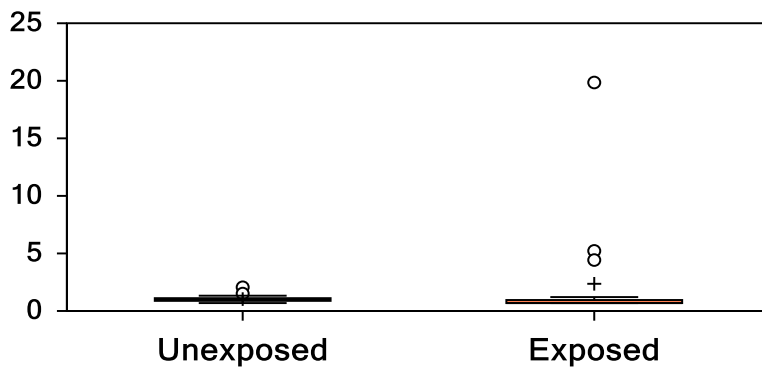

X - 17327

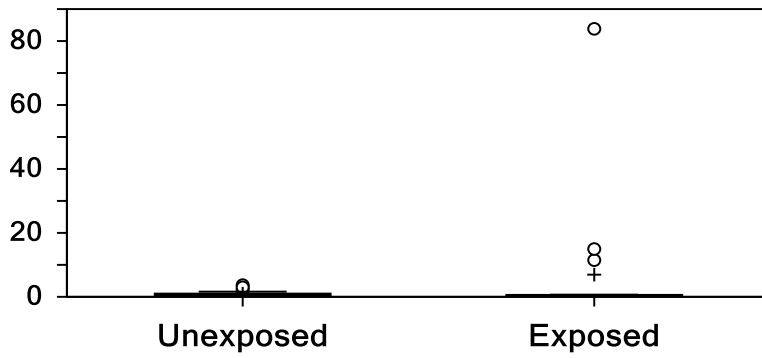

X - 17188

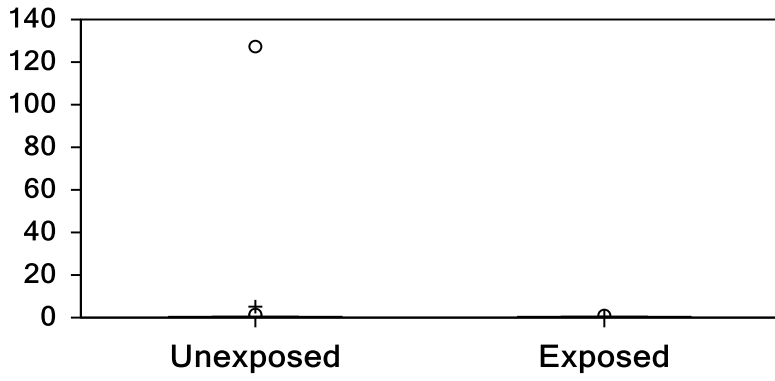

X - 17189

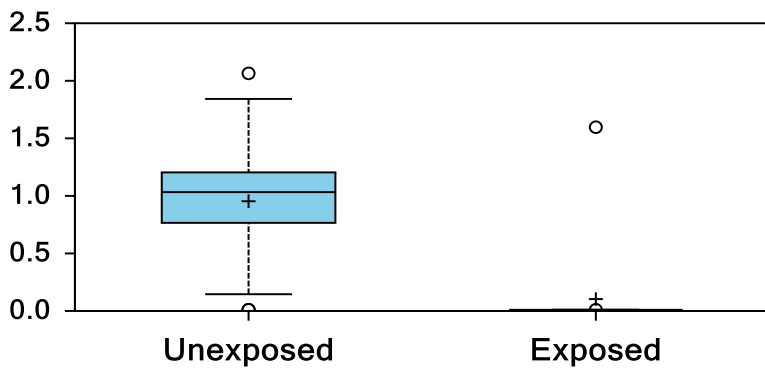

X - 17183

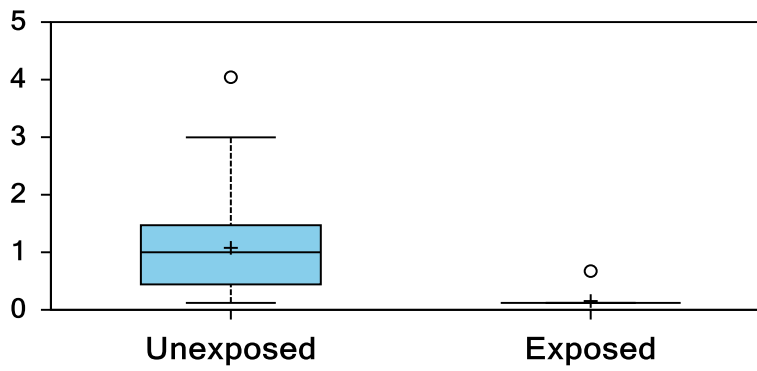

X - 17303

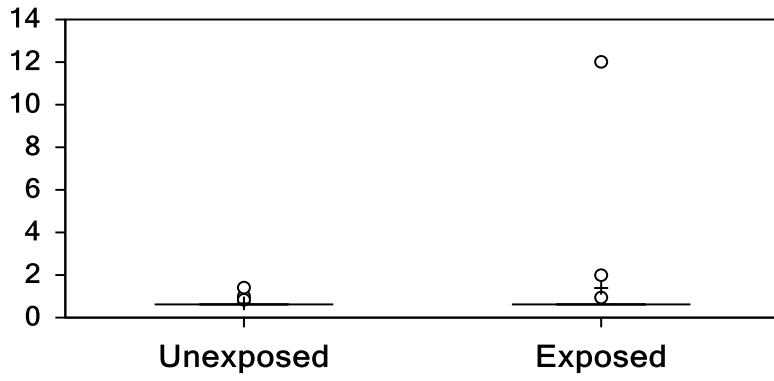

X - 17269

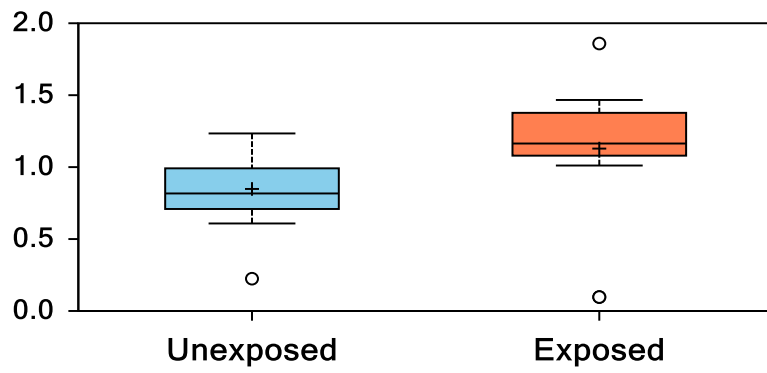

X - 17299

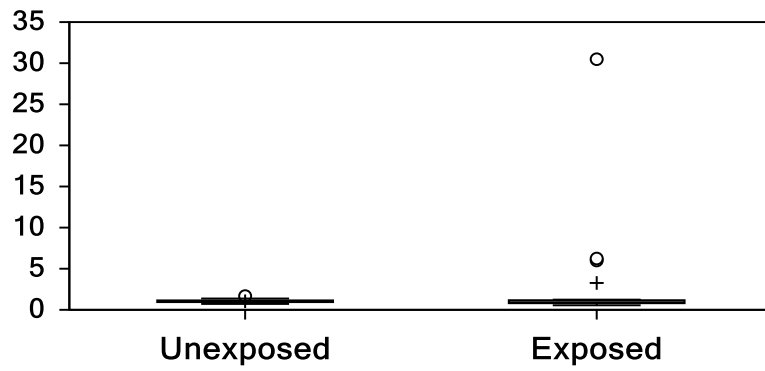

X - 12038

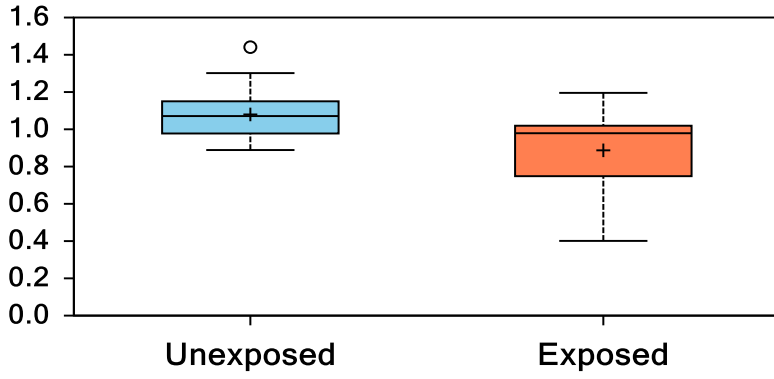

X - 11875

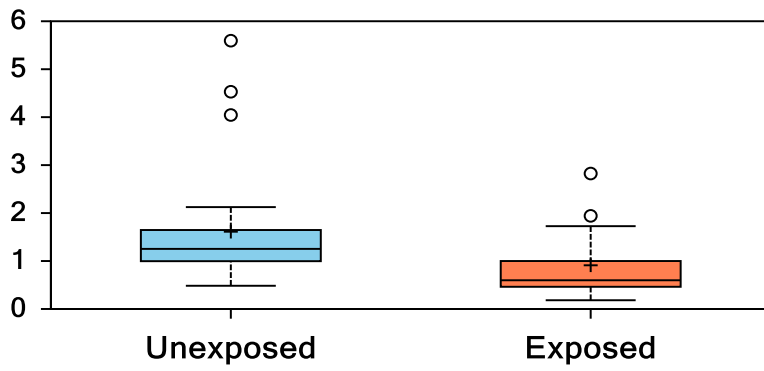

X - 12092

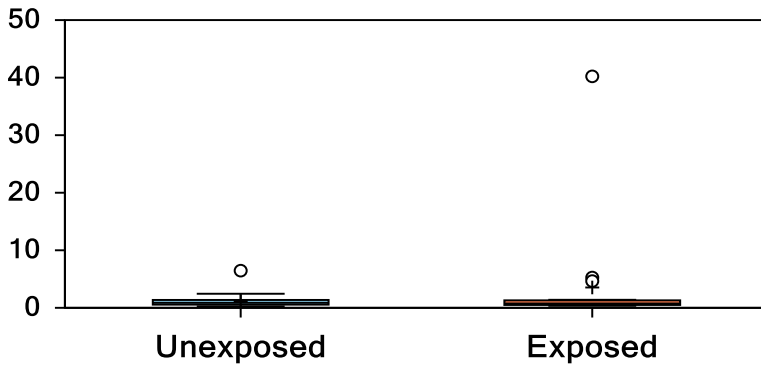

X - 12093

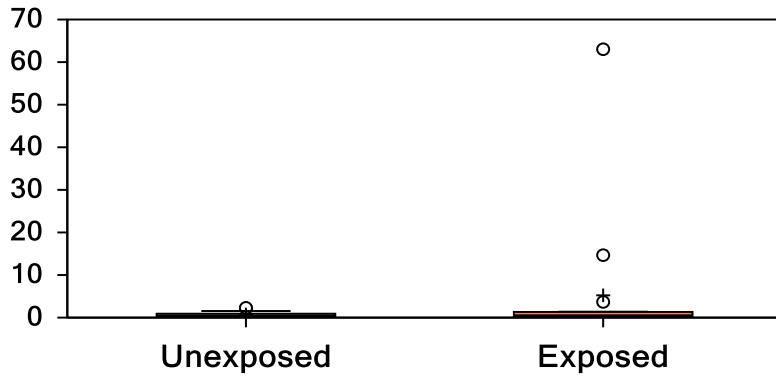

X - 12056

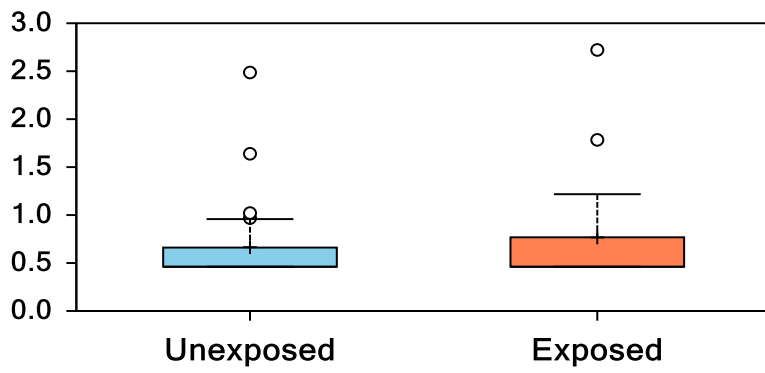

X - 11835

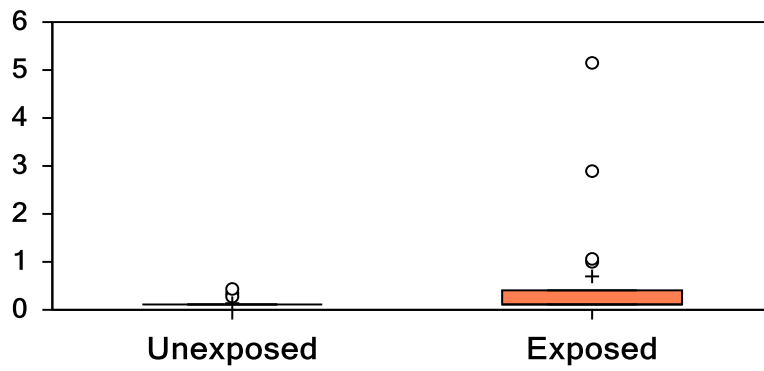

X - 11814

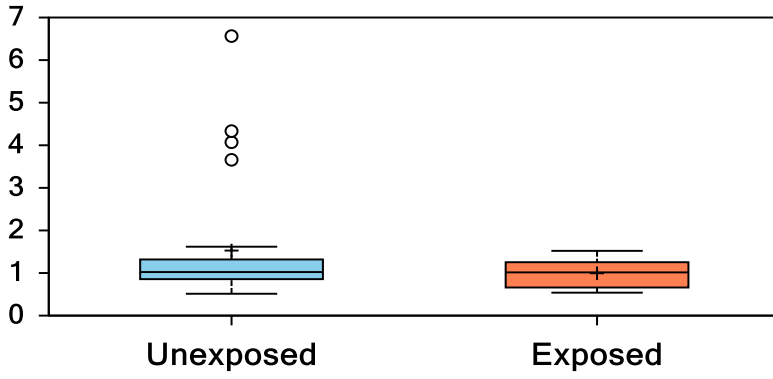

X - 11818

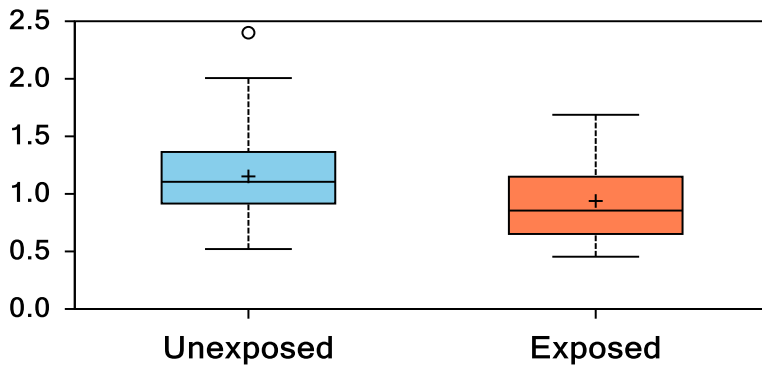

X - 11871

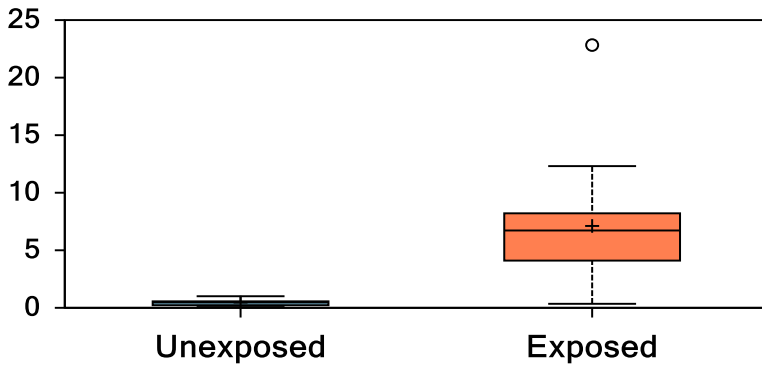

X - 11845

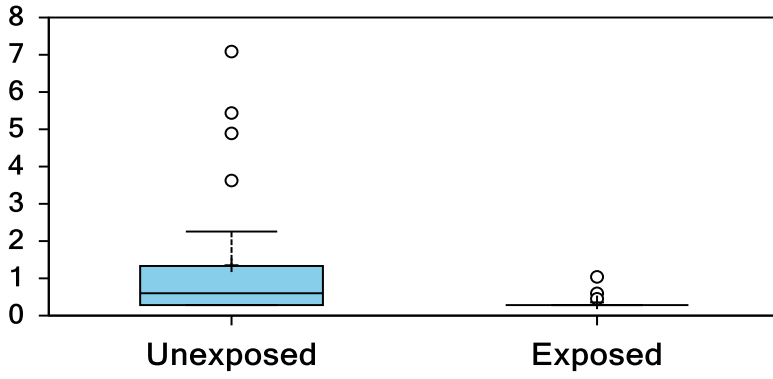

X - 12097

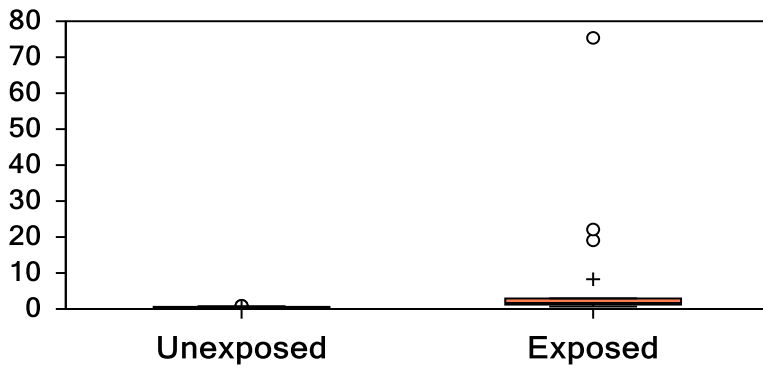

X - 12216

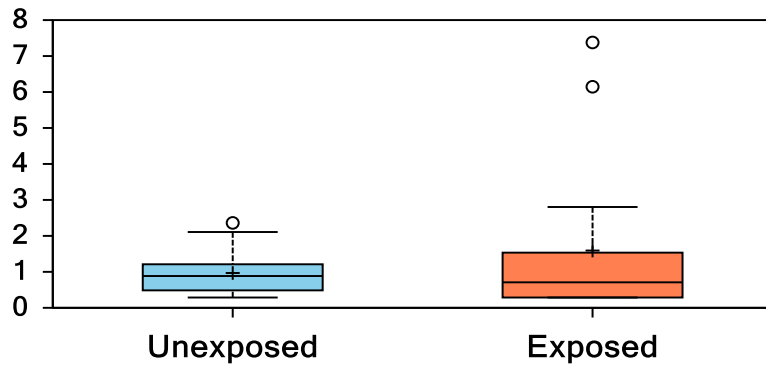



X - 12173

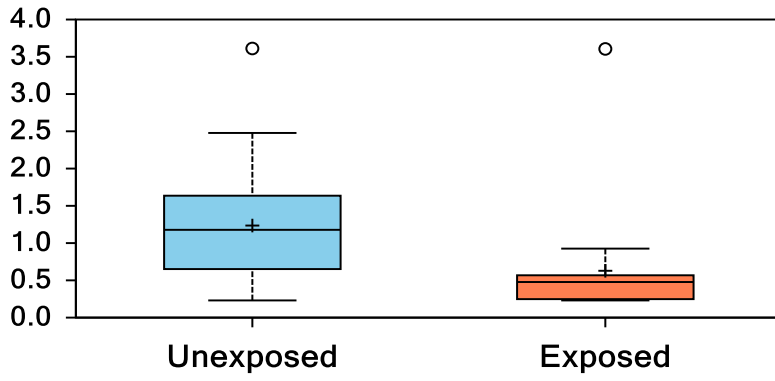

X - 12258

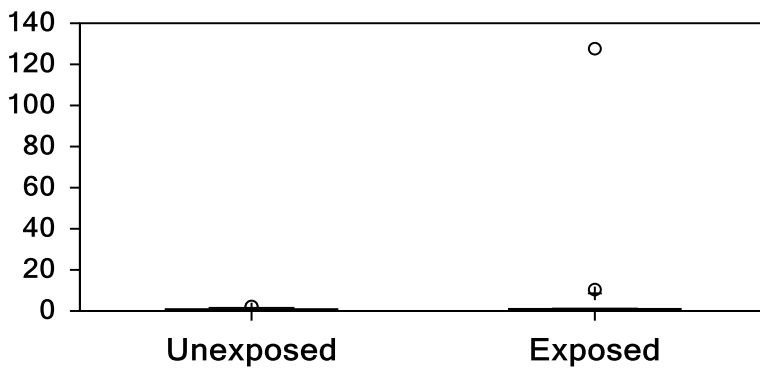

X - 12261

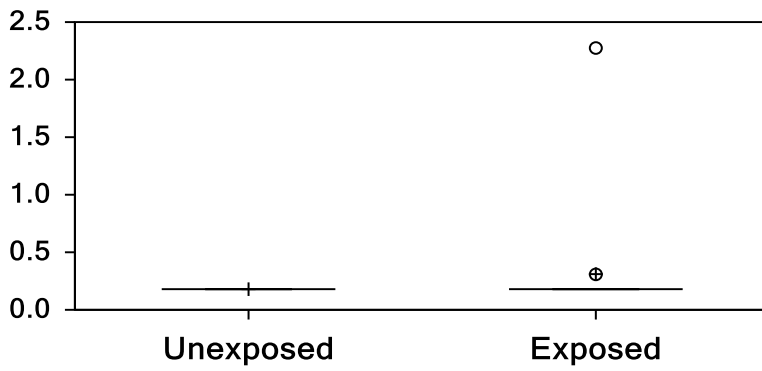

X - 12236

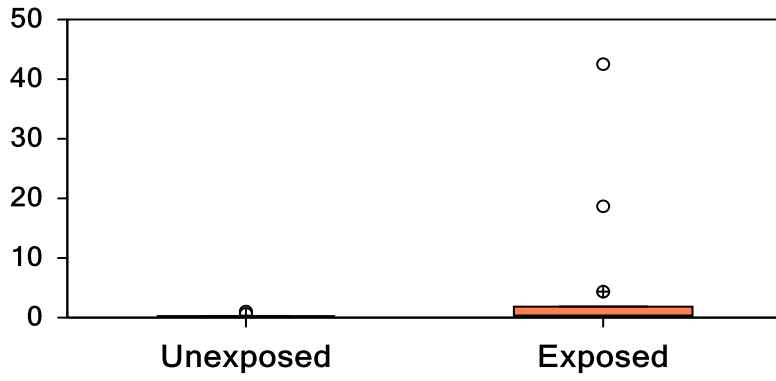

X - 12112

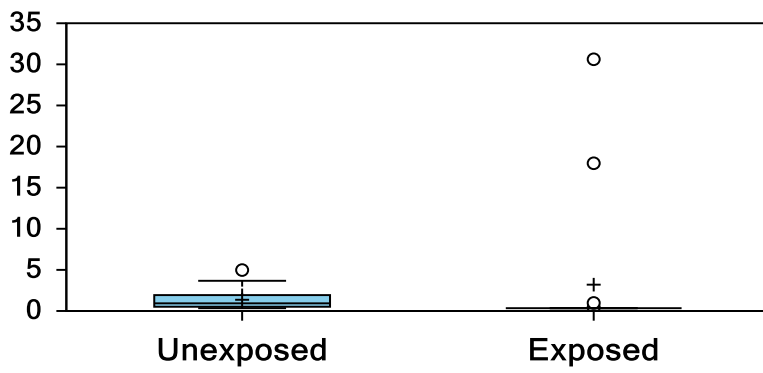

X - 12101

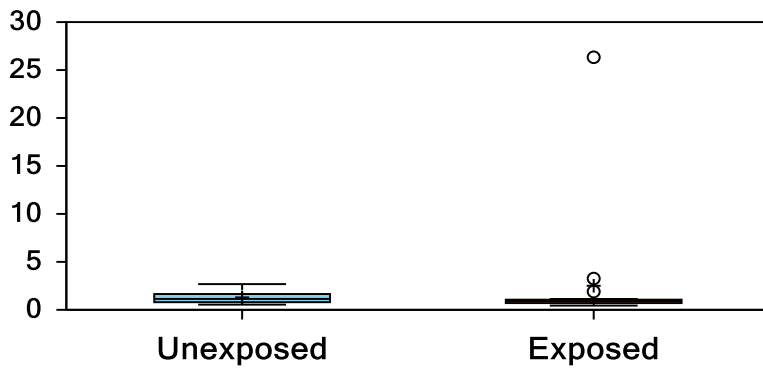

X - 12104

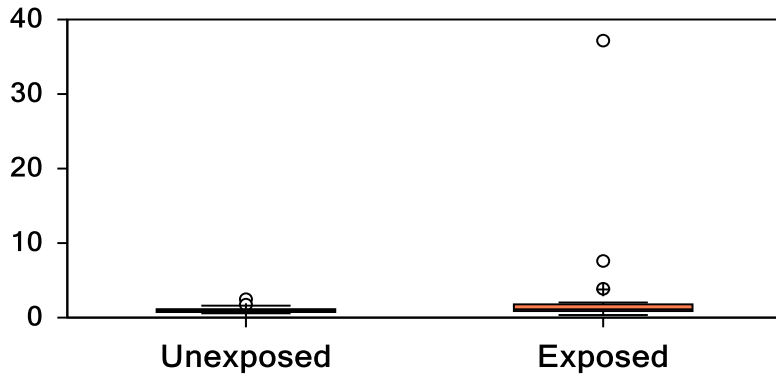

X - 12170

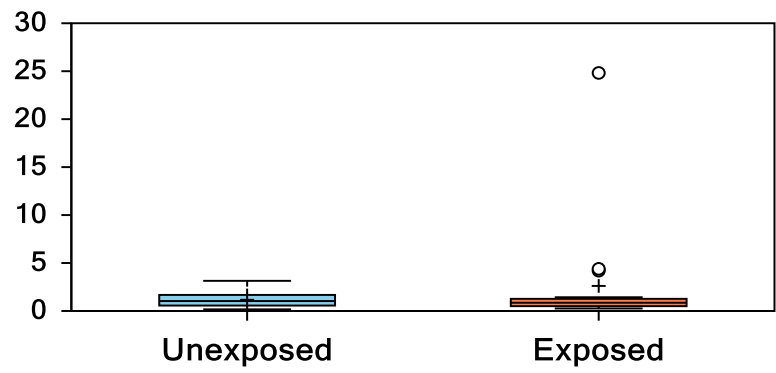

X - 12119

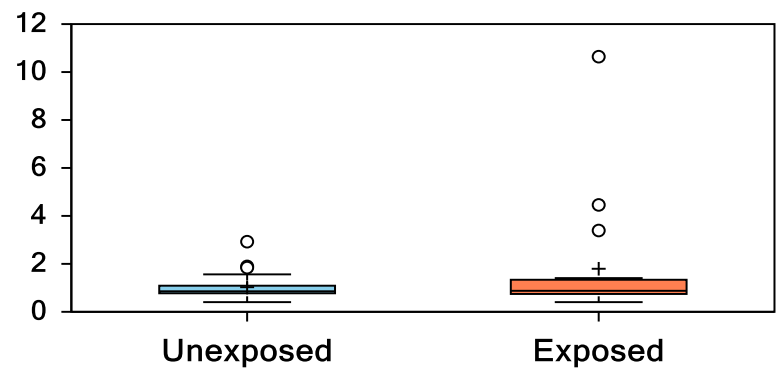

X - 11797

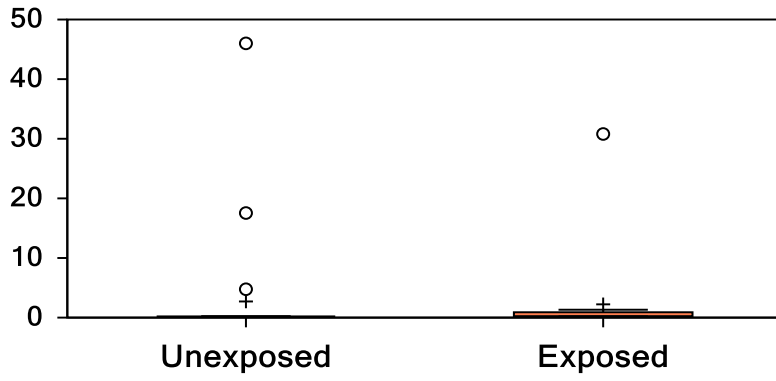

X - 11390

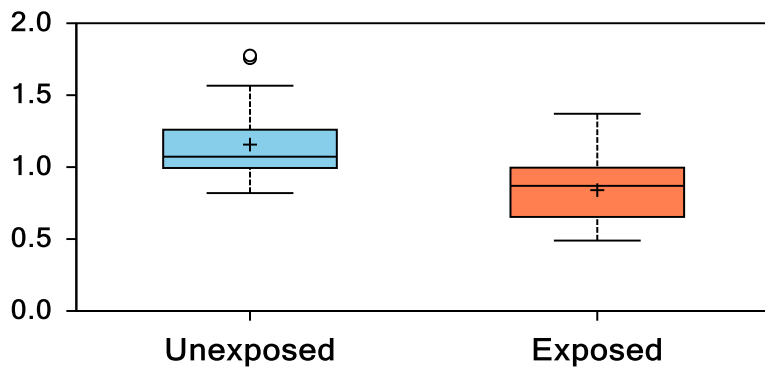

X - 11333

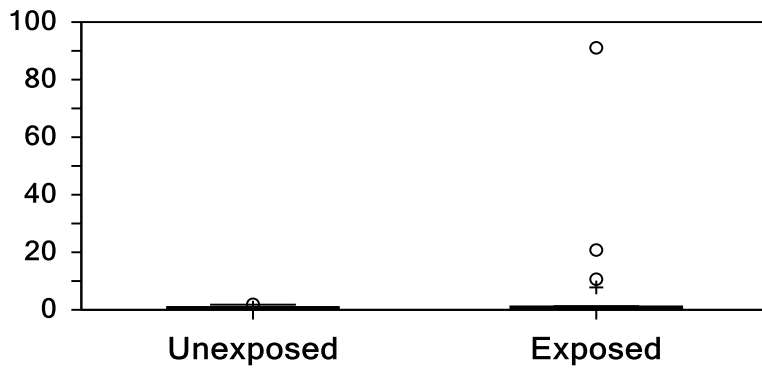

X - 11438

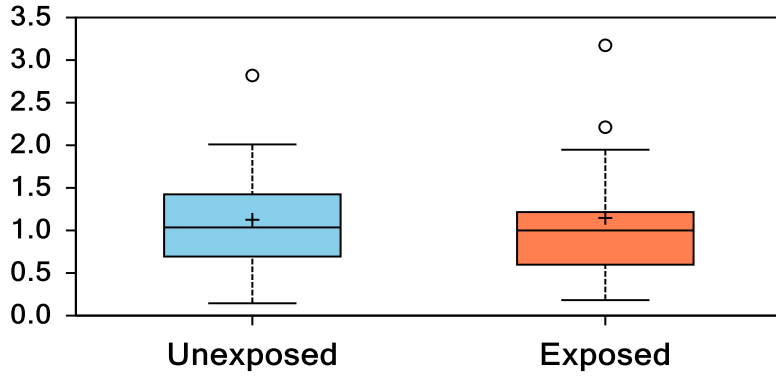

X - 11440

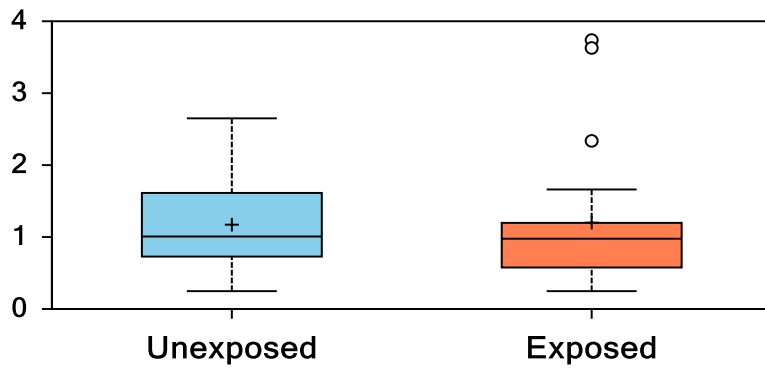

X - 11429

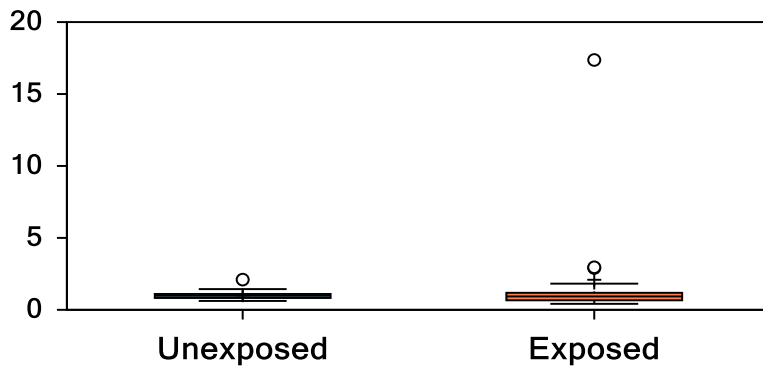

X - 06126

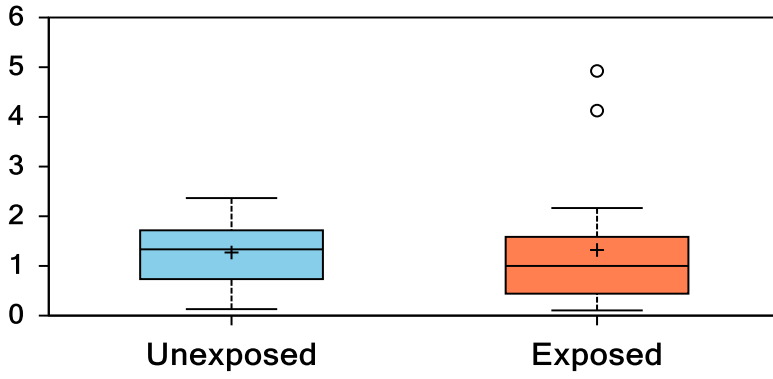

X - 02249

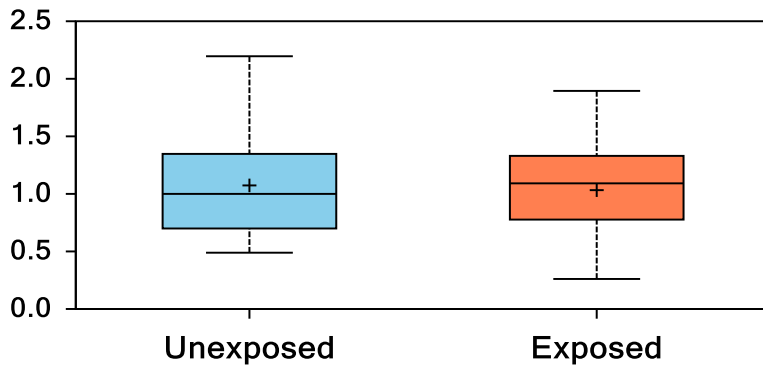

X - 02269

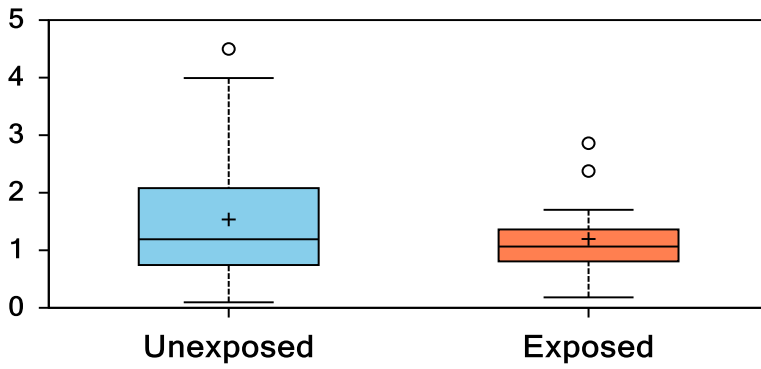

X - 11327

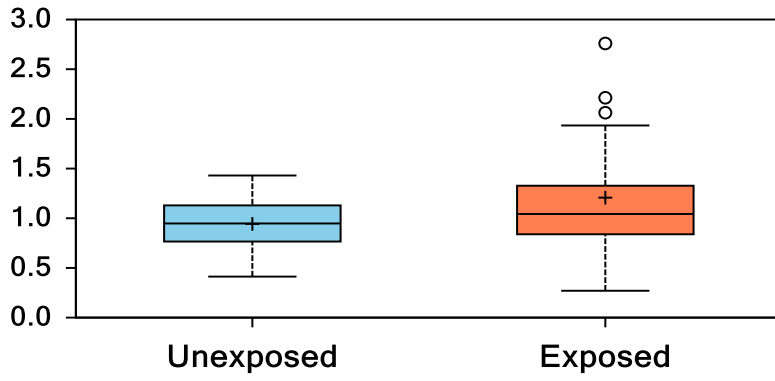

X - 11204

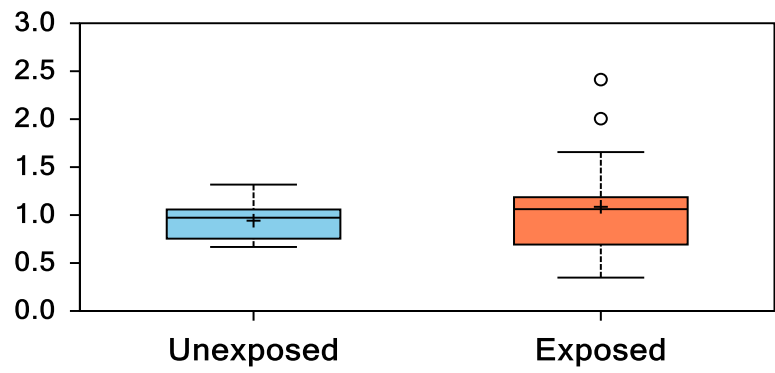

X - 11442

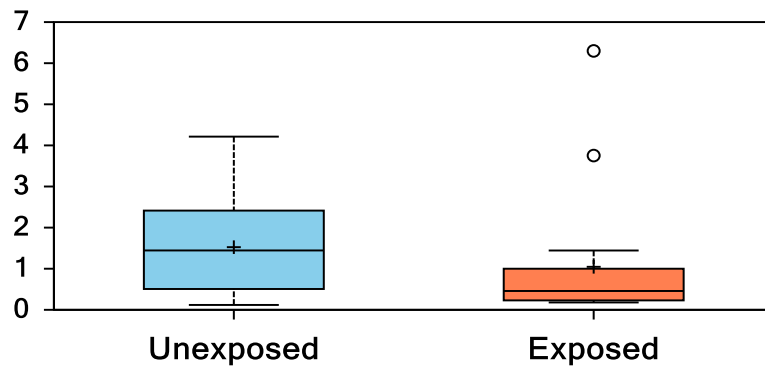

X - 11564

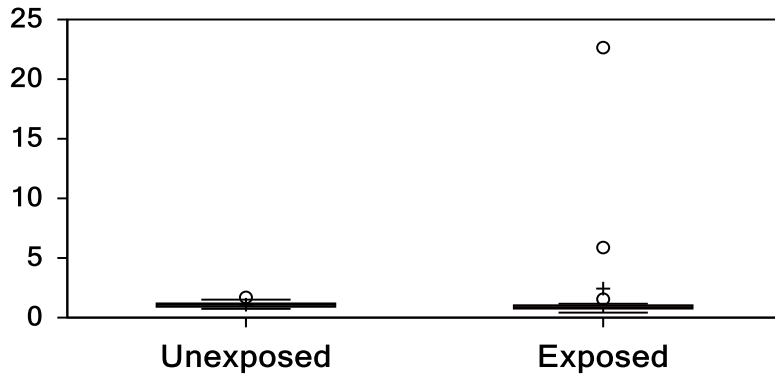

X - 11538

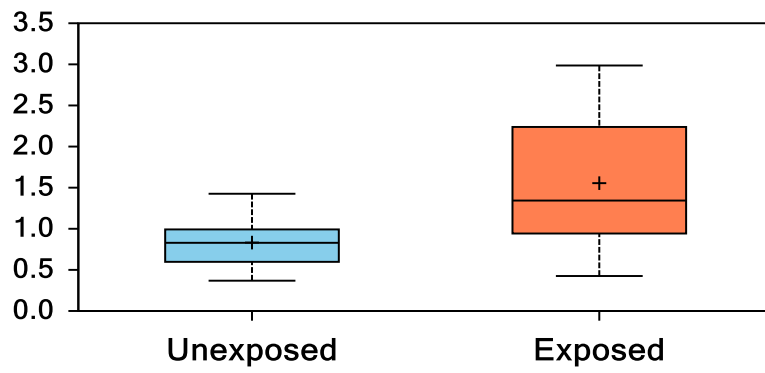

X - 11787

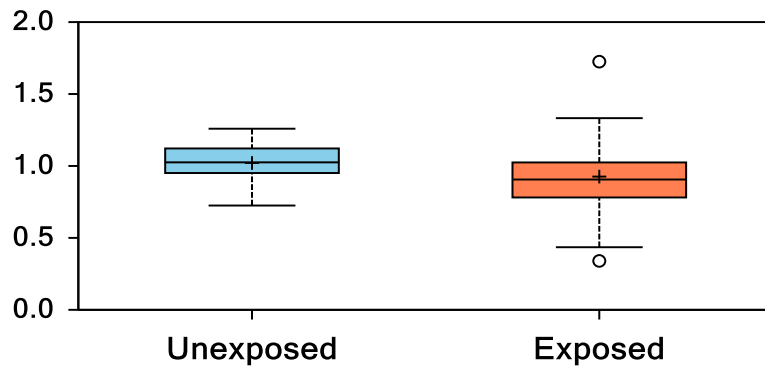



X - 11793

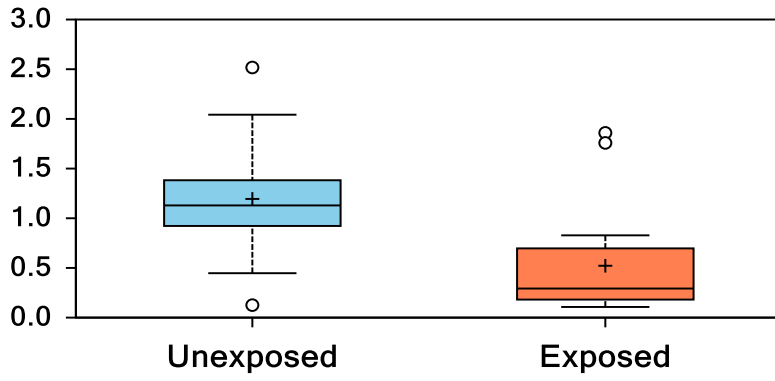

X - 11687

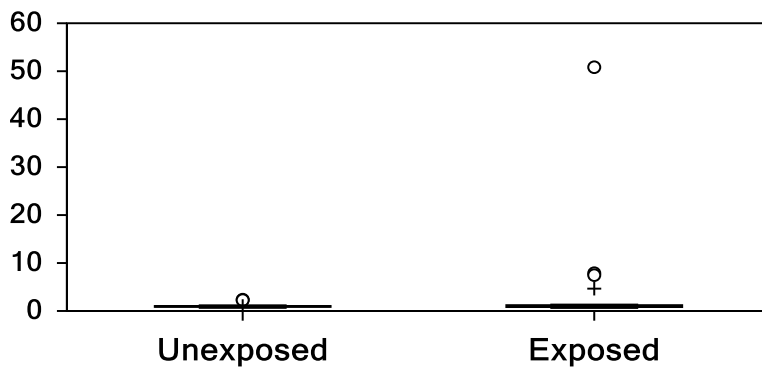

X - 11476

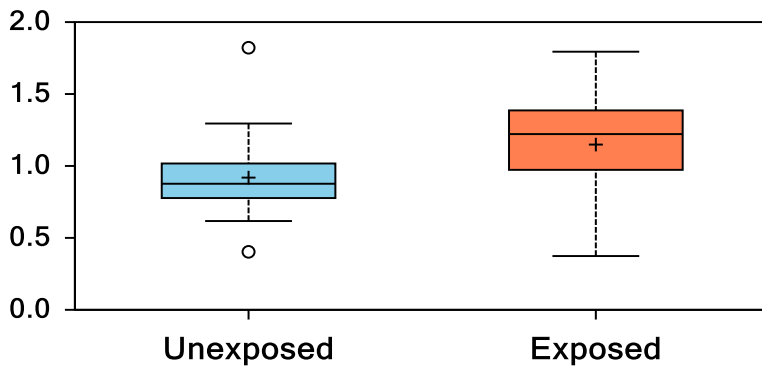

X - 11452

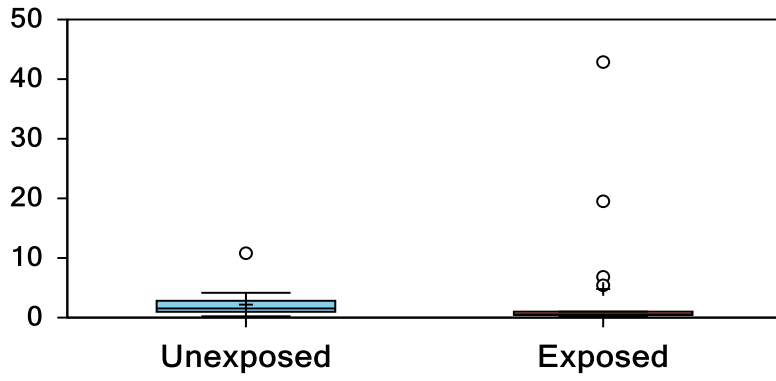

X - 11469

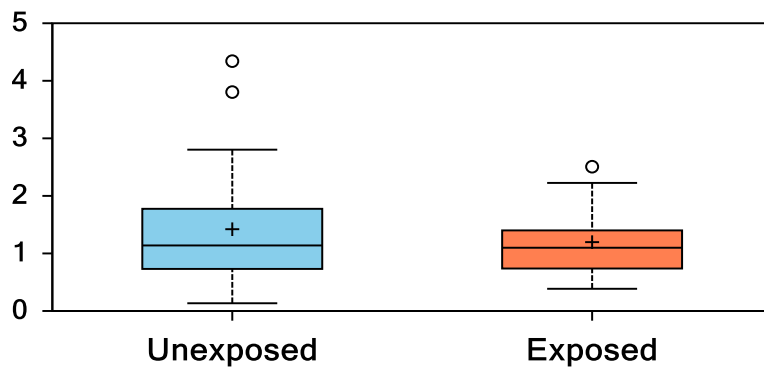

X - 11537

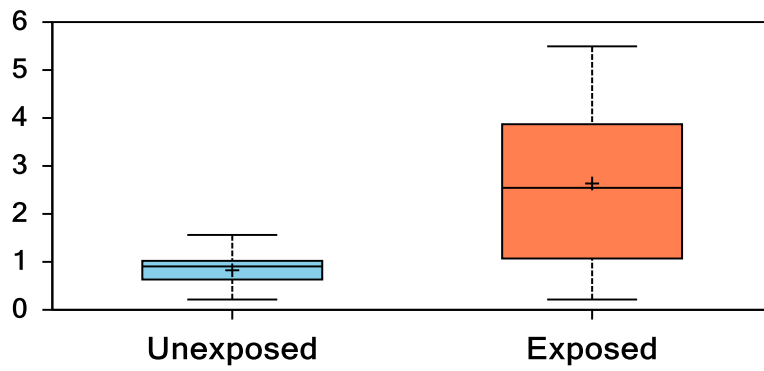

X - 11491

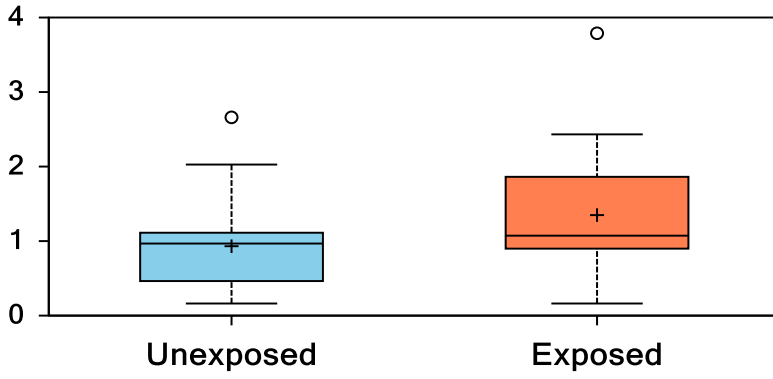

X - 13671

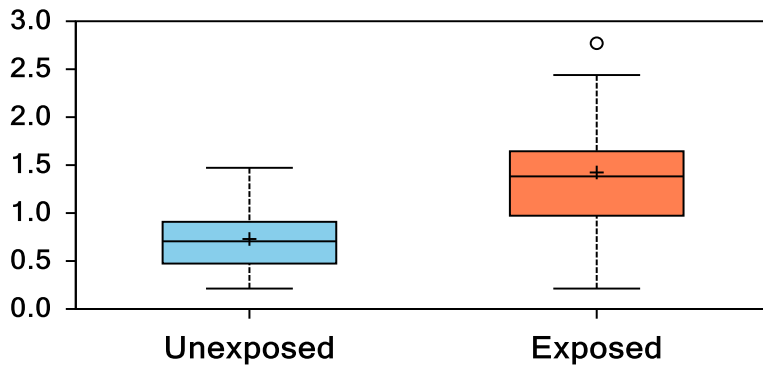

X - 13687

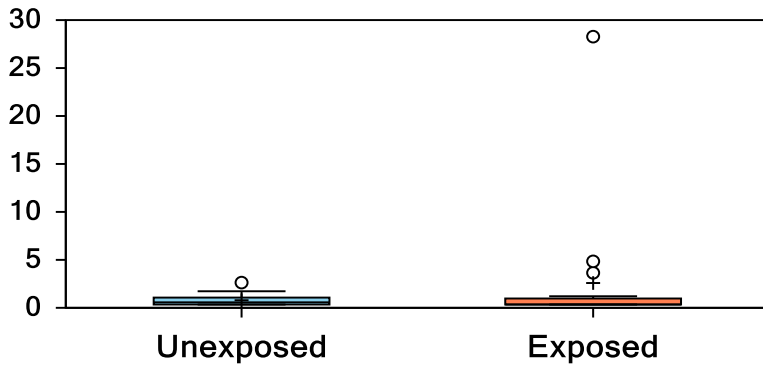

X - 13581

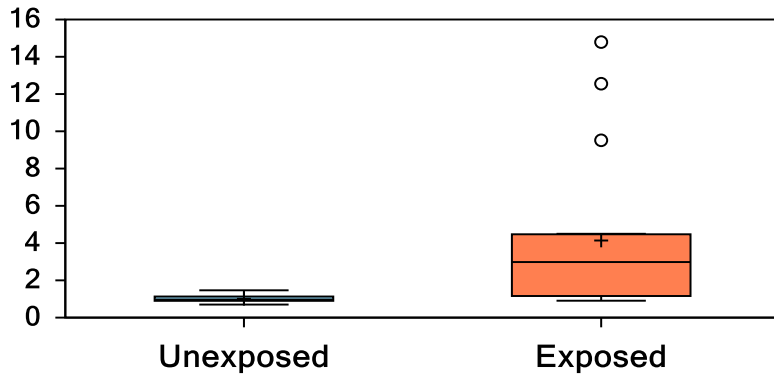

X - 13726

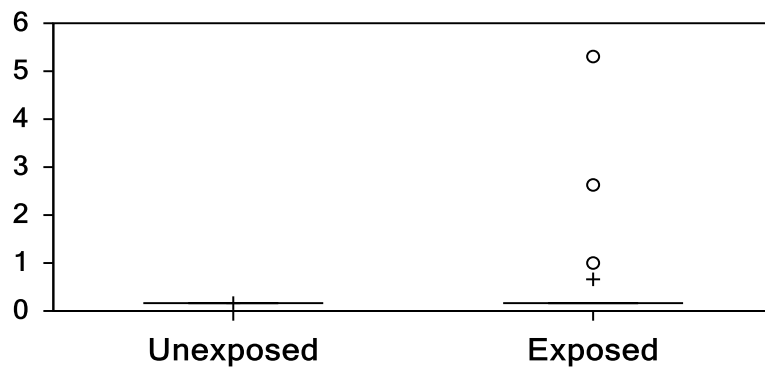

X - 13703

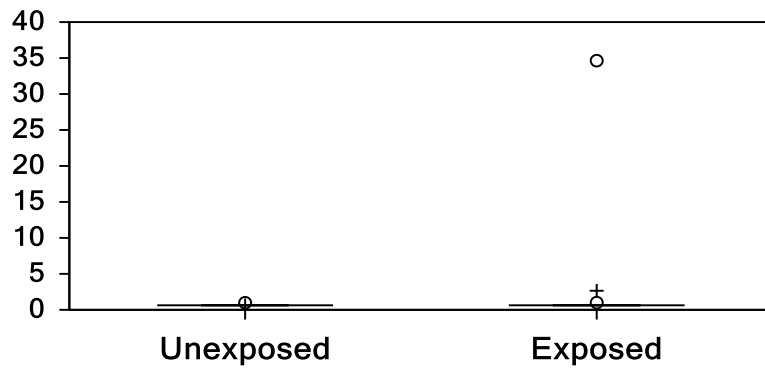

X - 13706

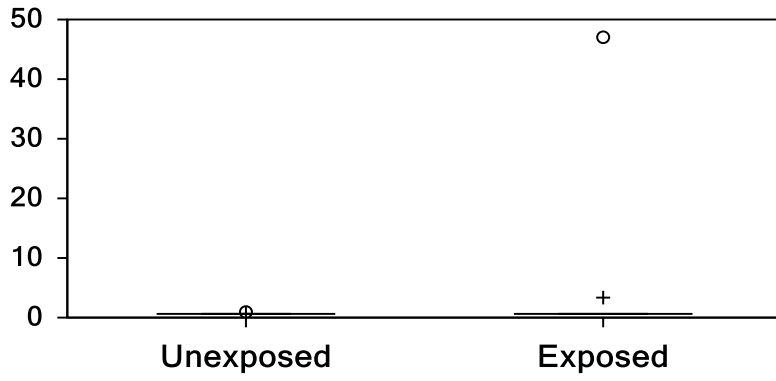

X - 13152

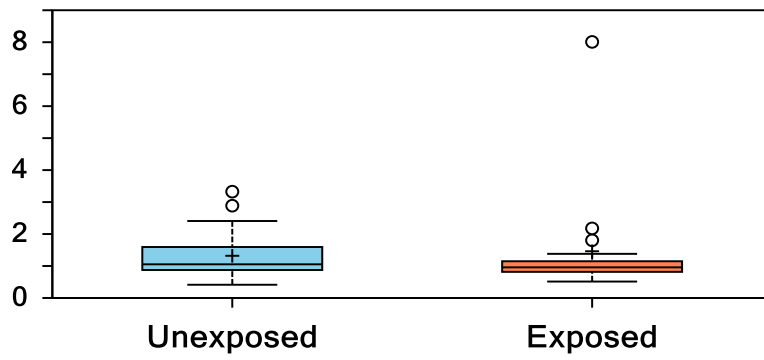

X - 12860

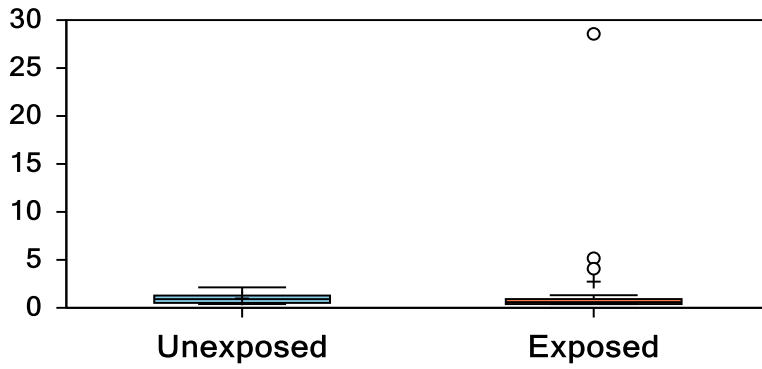

X - 13431

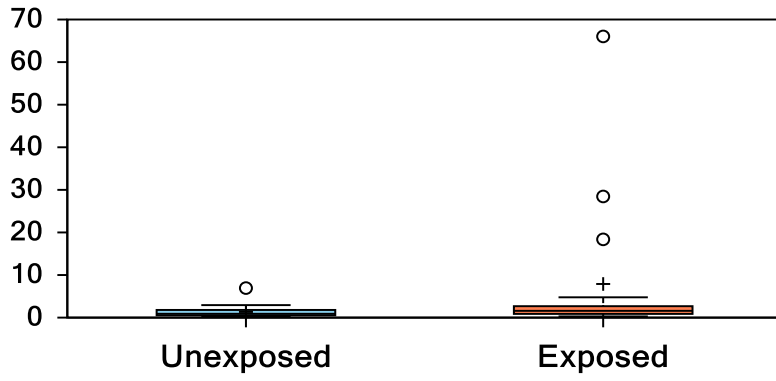

X - 13452

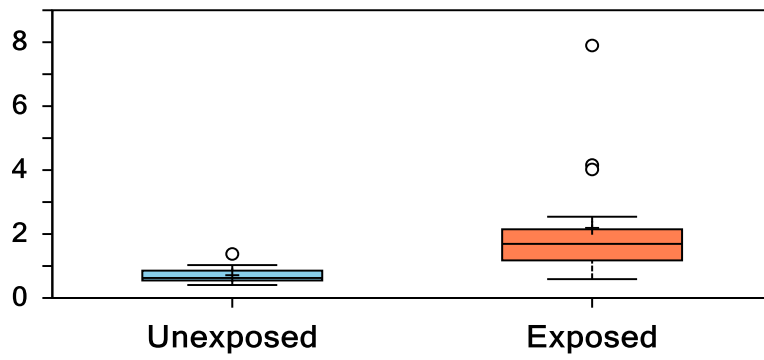

X - 13424

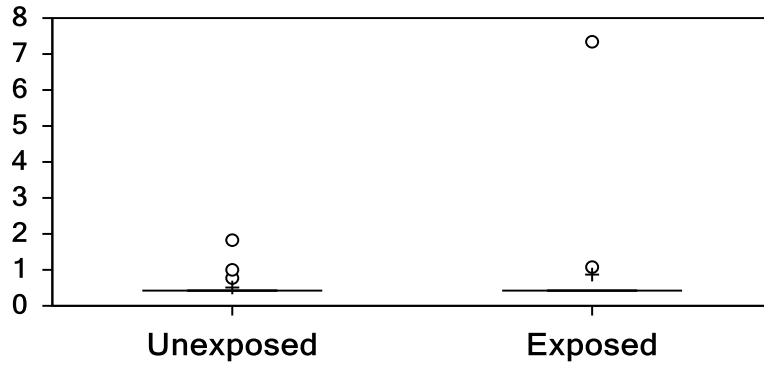

X - 14101

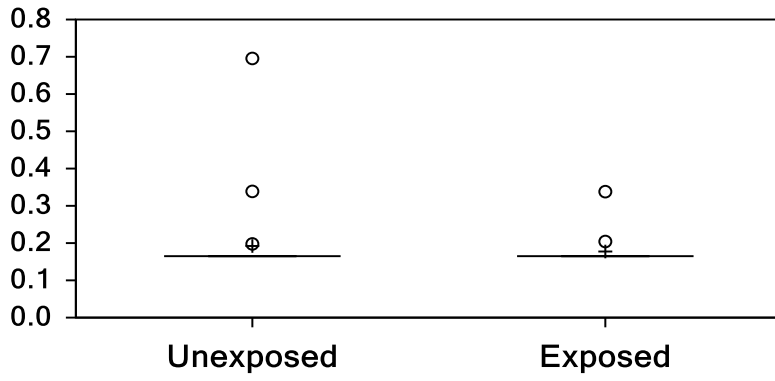

X - 14105

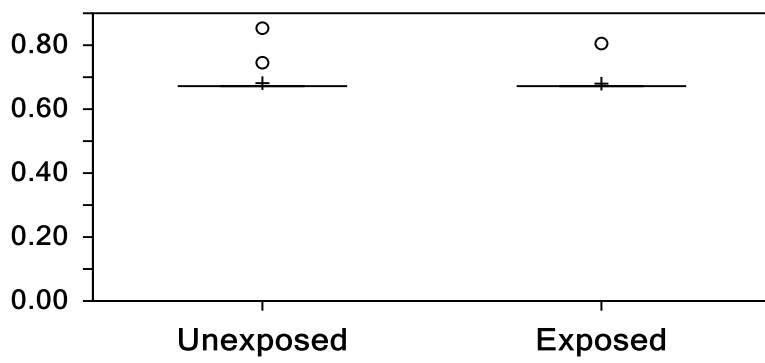

X - 14097

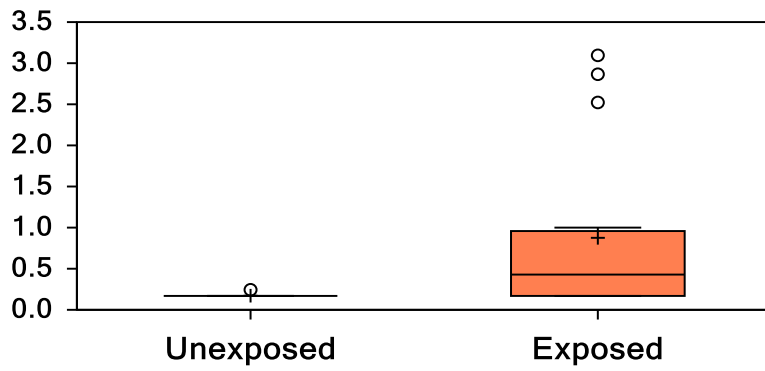

X - 14153

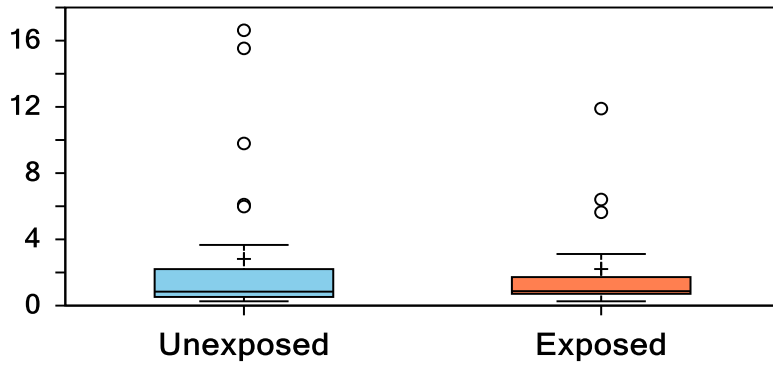

X - 14145

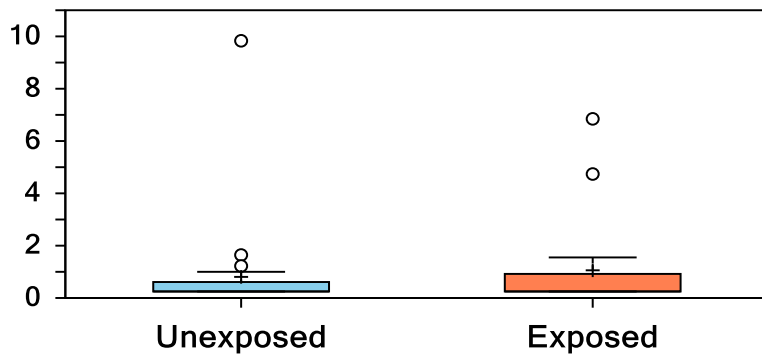

X - 14147

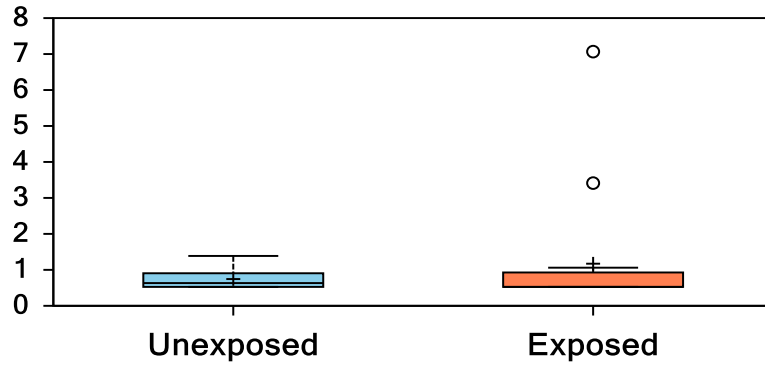



X - 13866

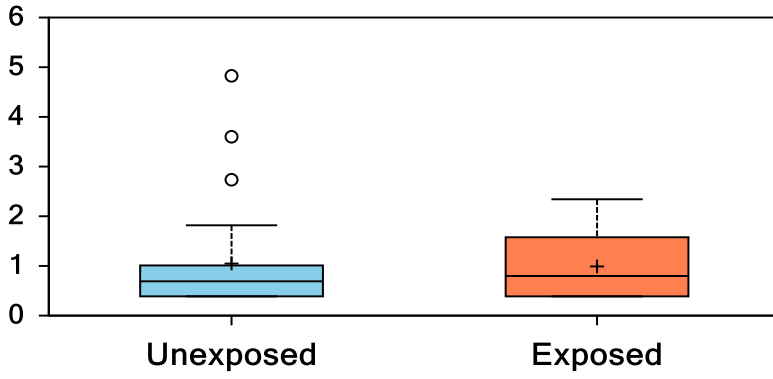

X - 13741

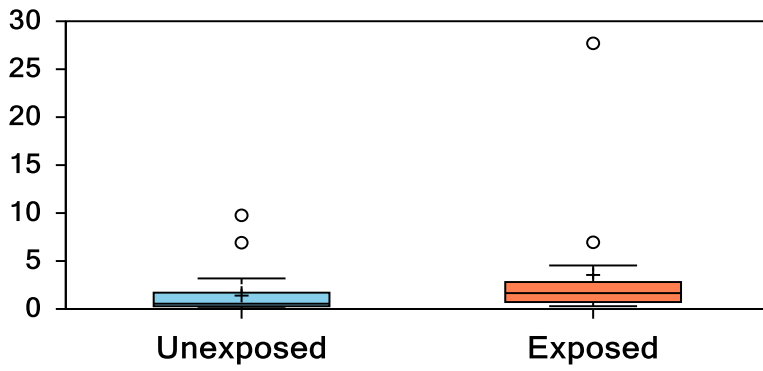

X - 14082

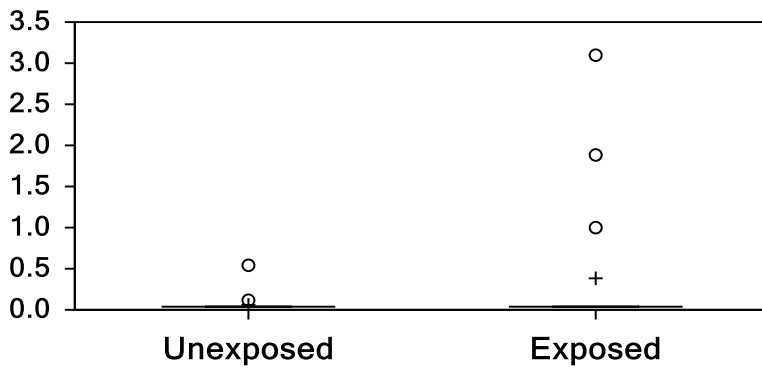

X - 14086

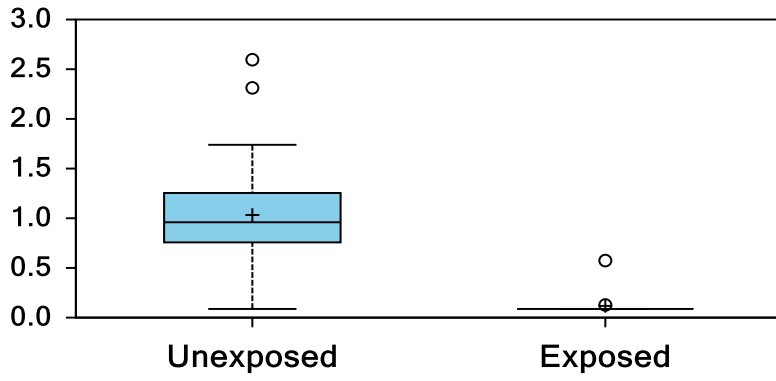

X - 14057

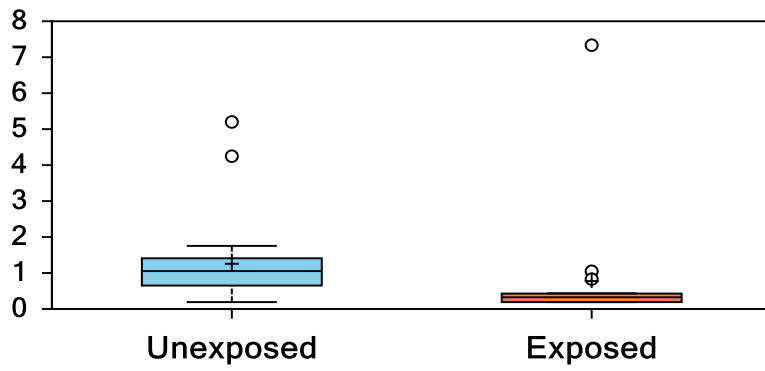

X - 12636

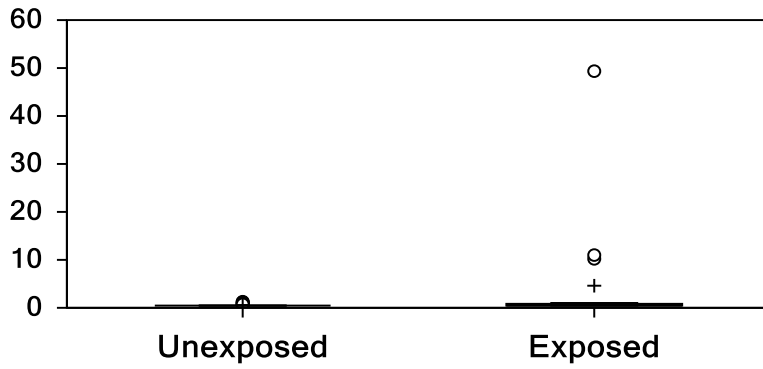

X - 12644

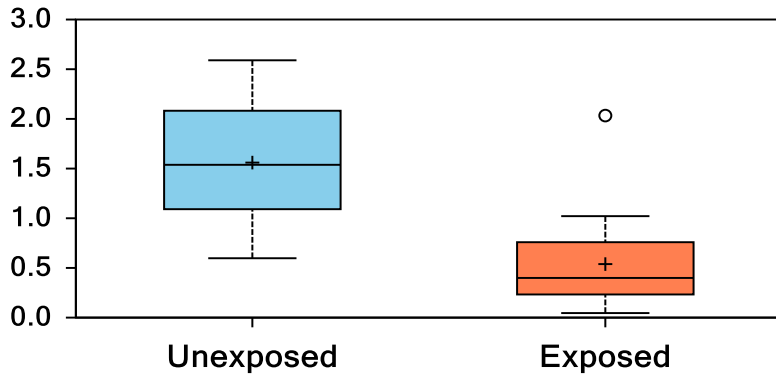

X - 12609

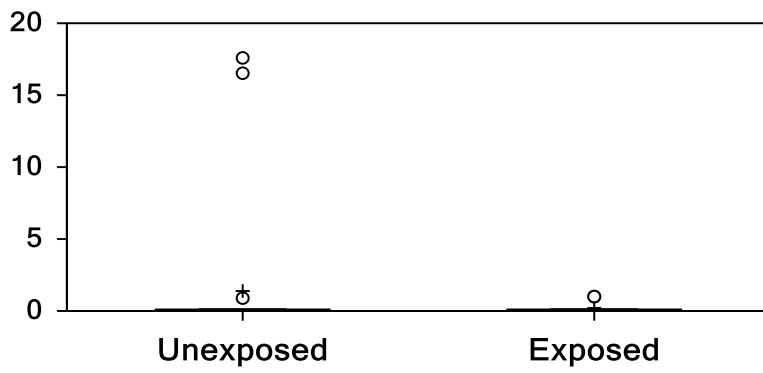

X - 12704

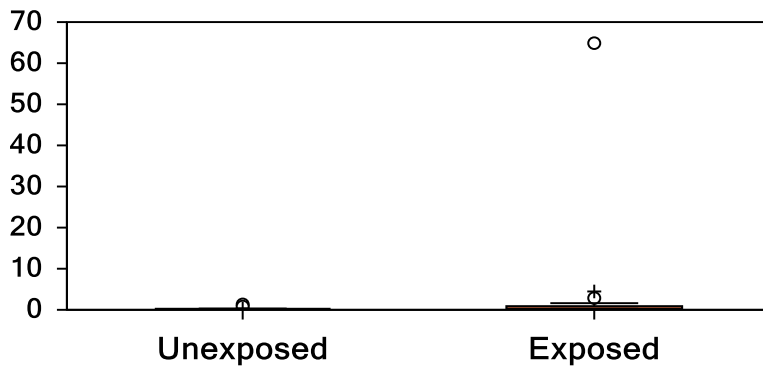

X - 12686

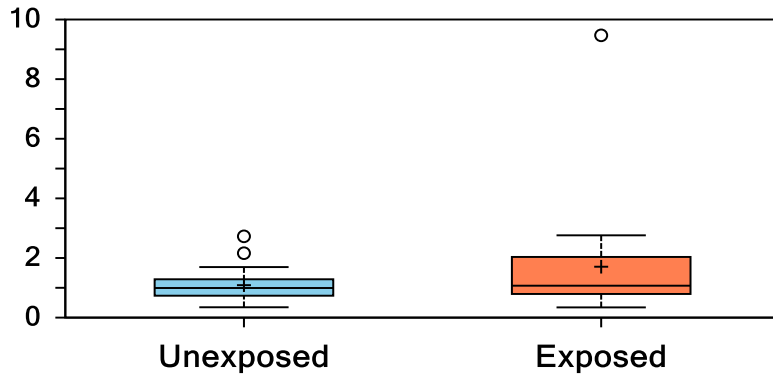

X - 12690

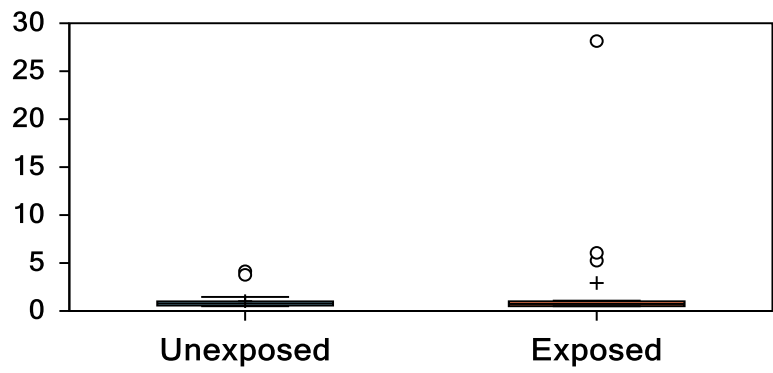

X - 12410

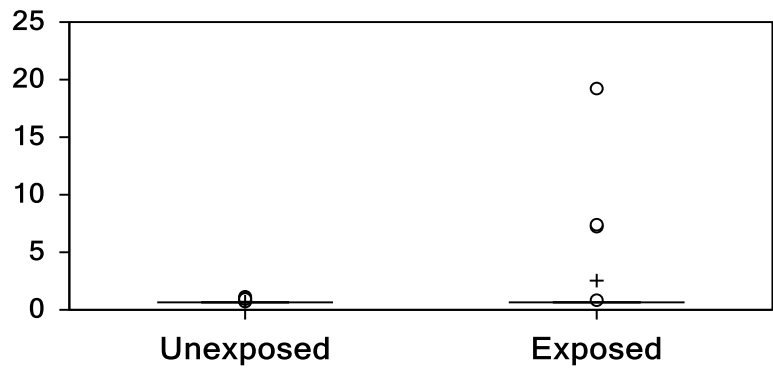

X - 12283

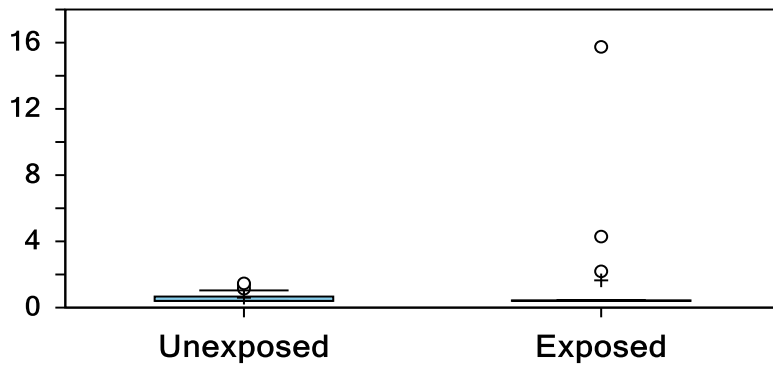

X - 12510

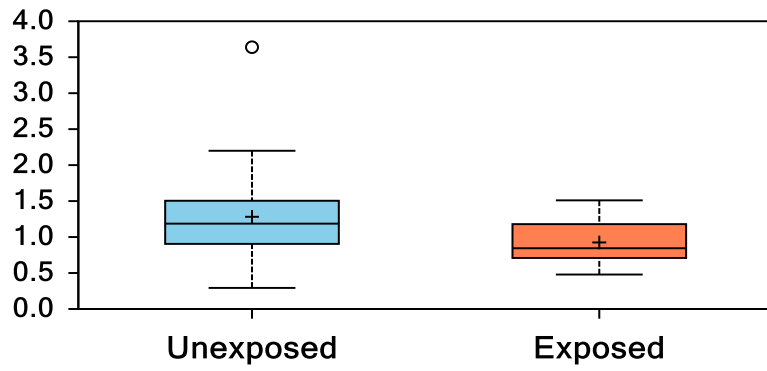

X - 12511

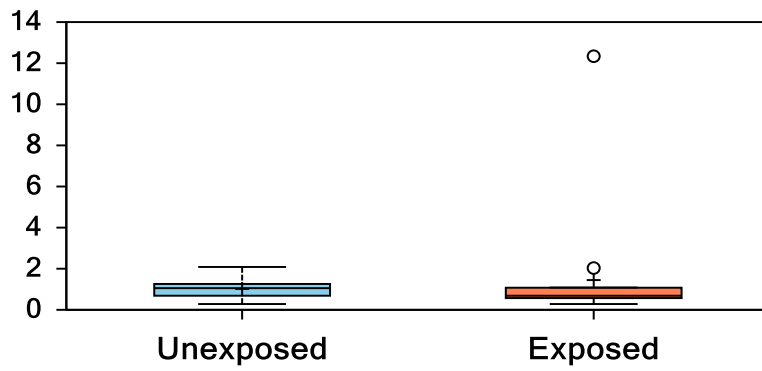

X - 12450

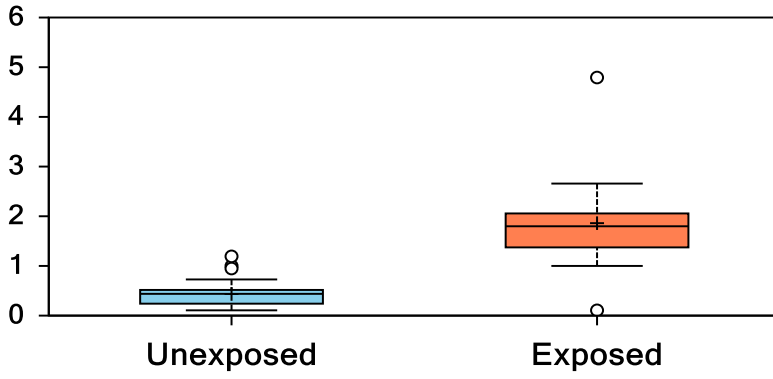

X - 12824

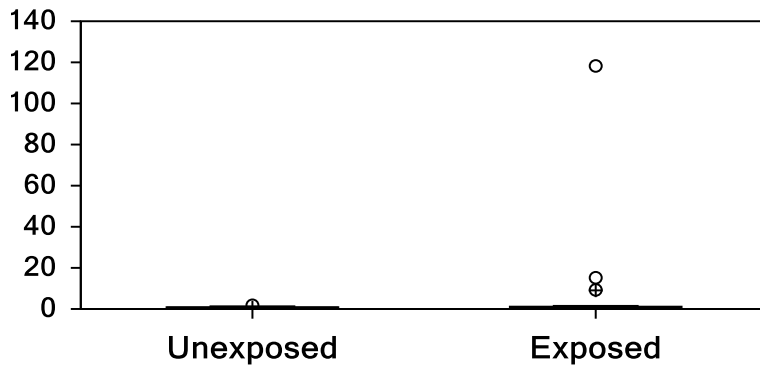

X - 12828

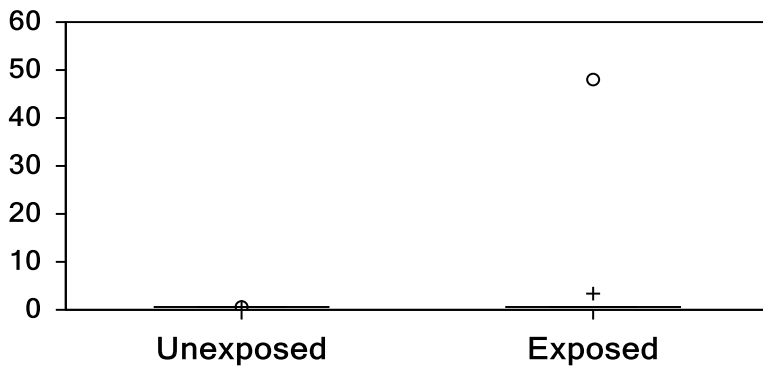

X - 12819

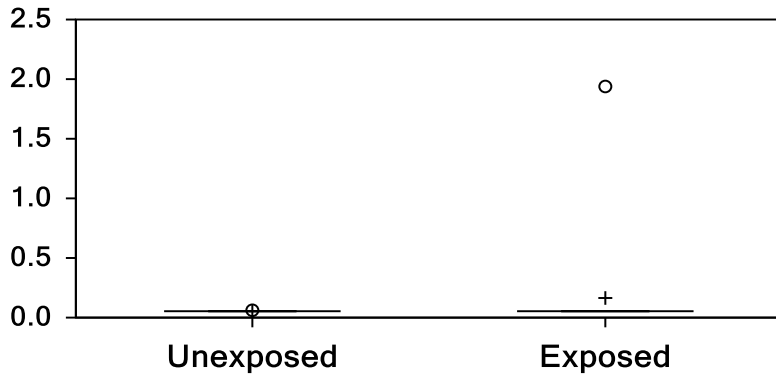

X - 12846

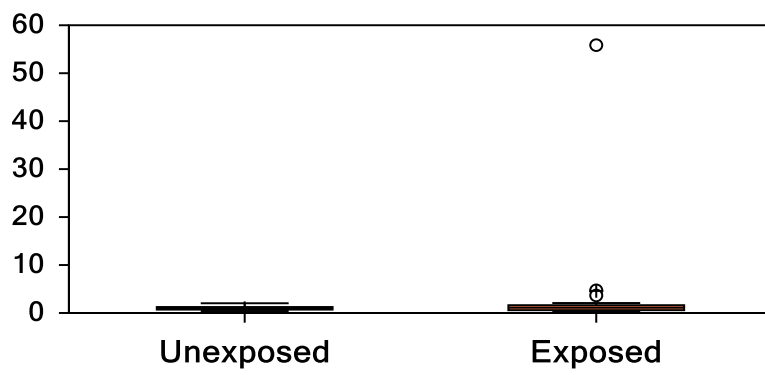

X - 12832

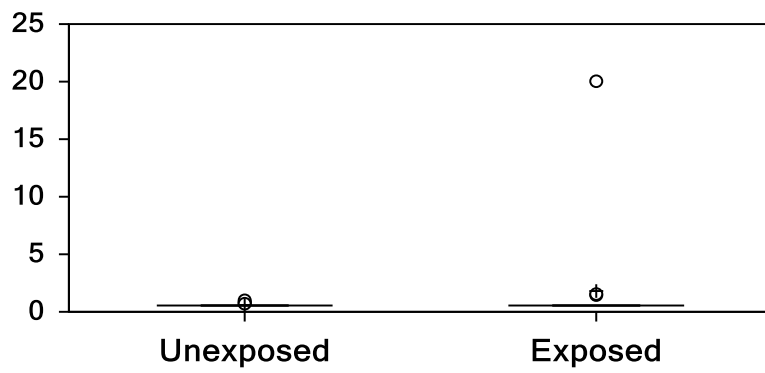

X - 12837

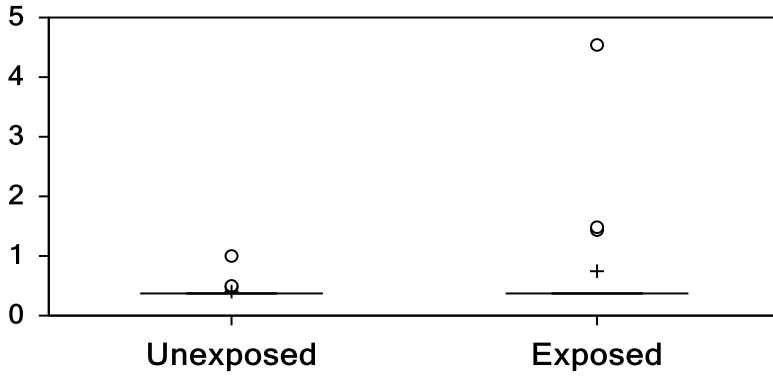

X - 12746

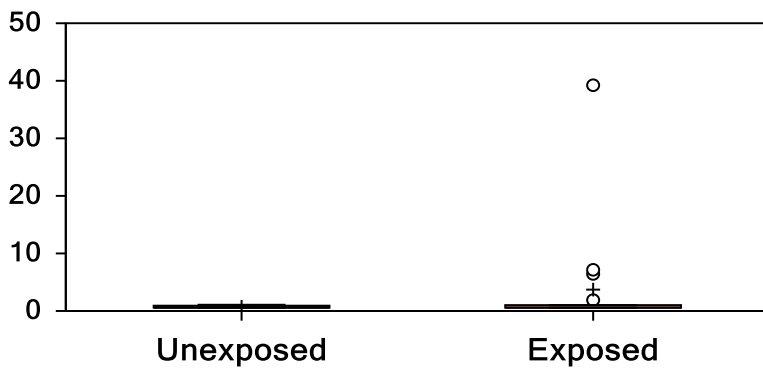

X - 12731

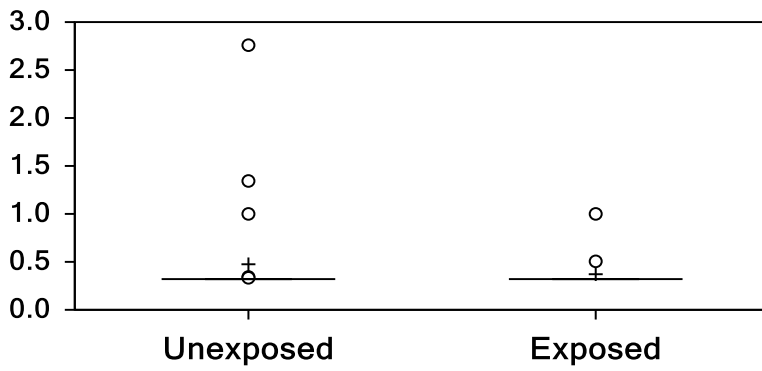



X - 12780

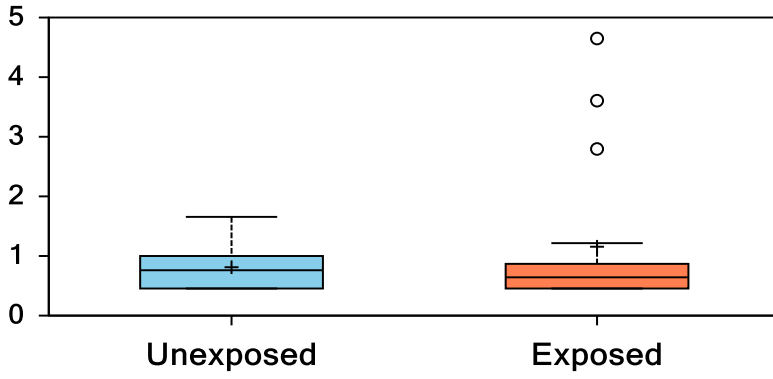

X - 12802

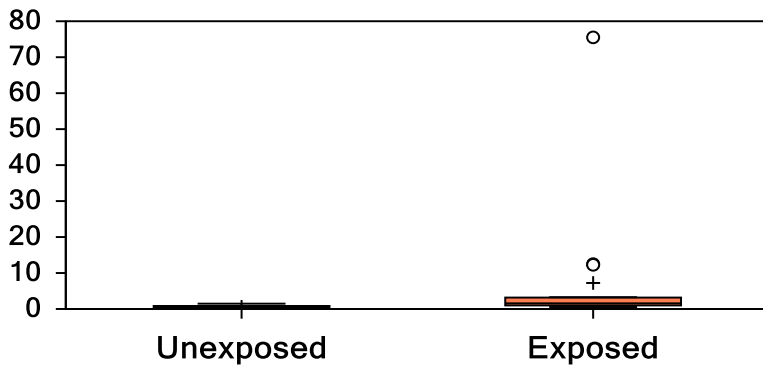

X - 12768

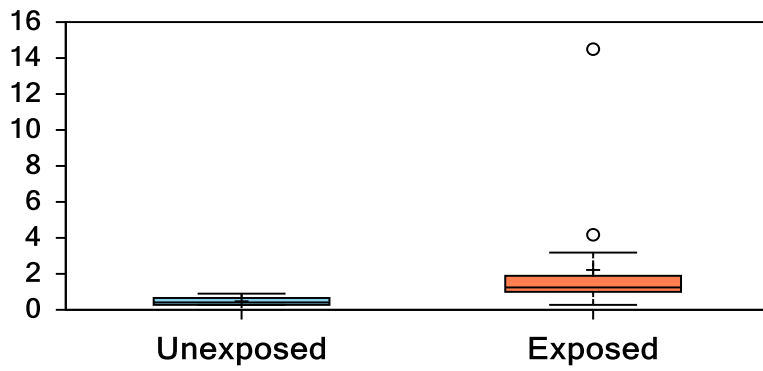

sarcosine (N-Methylglycine)

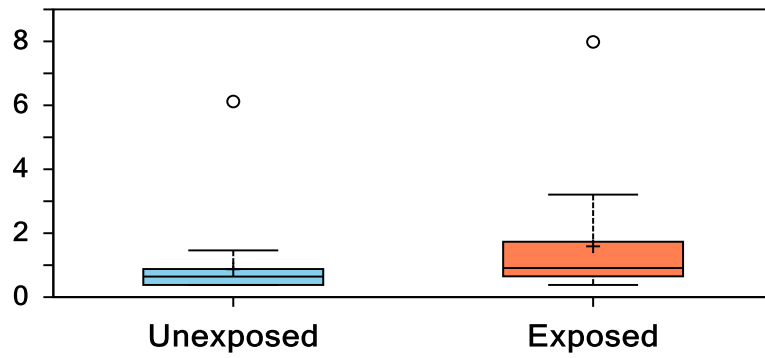

beta-hydroxypyruvate

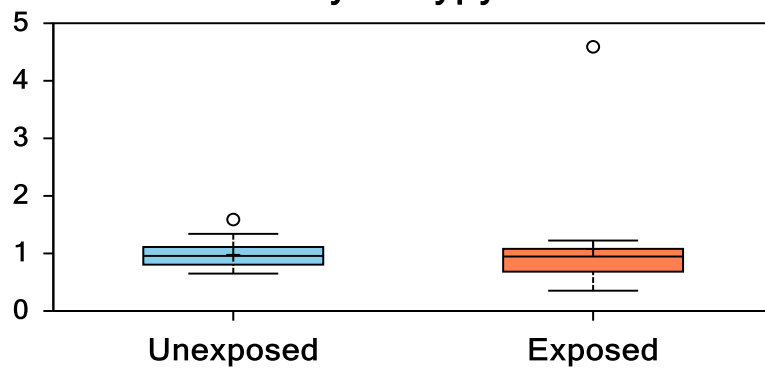

homoserine

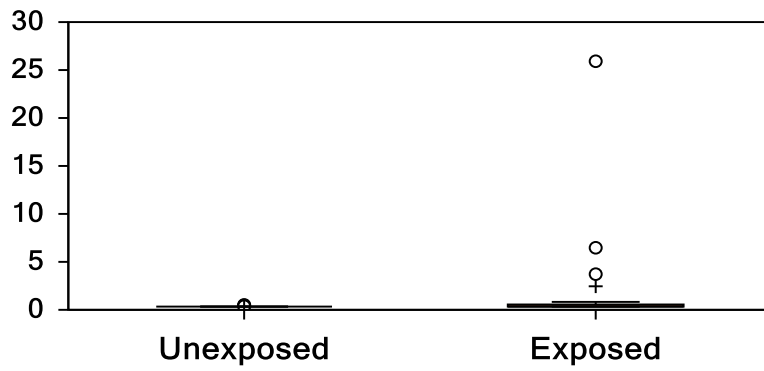

**betaine**

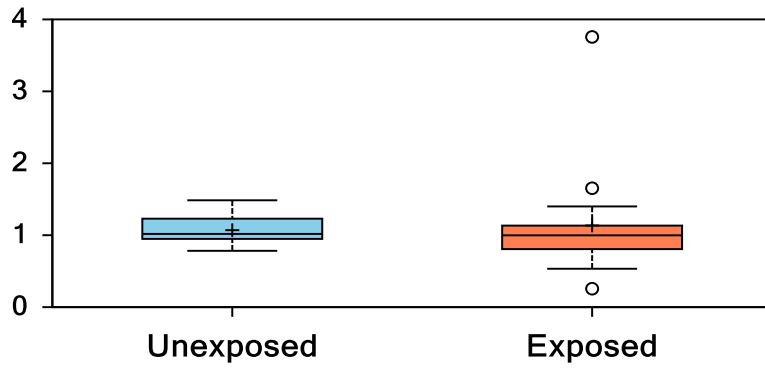

**N-acetylasparagine**

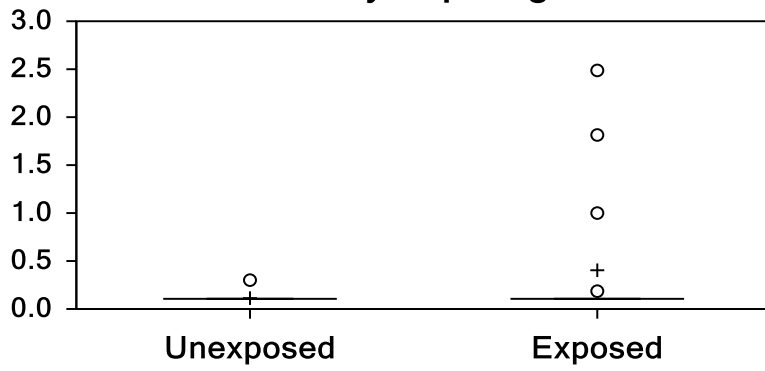

**N-acetyl-beta-alanine**

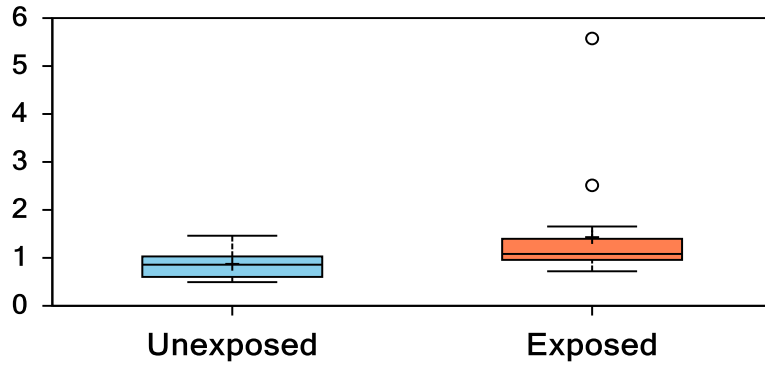

### N-carbamoylaspartate

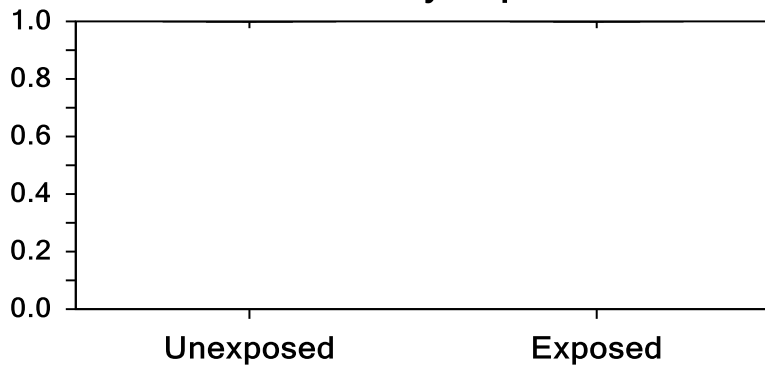

### glutamine

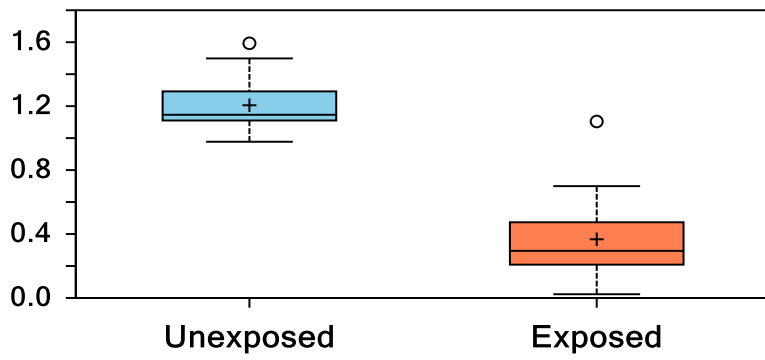

### N-acetyl-aspartyl-glutamate (NAAG)

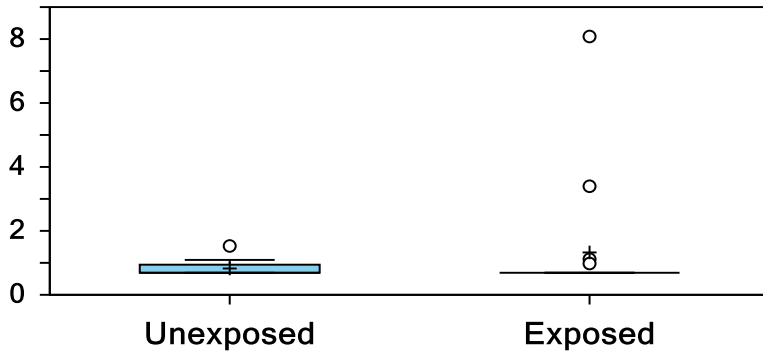

### trans-urocanate

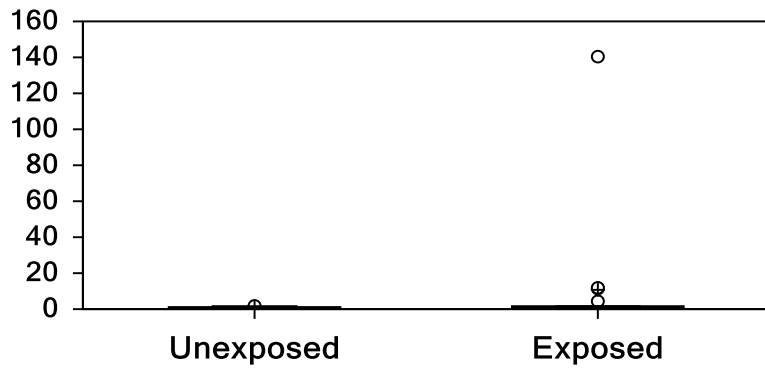

### imidazole lactate

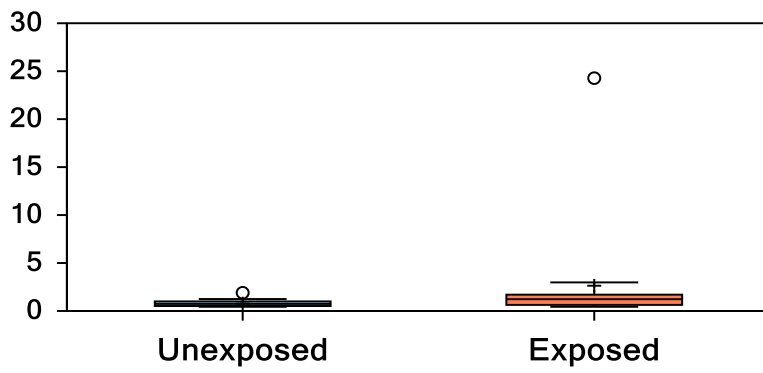

### 4-imidazoleacetate

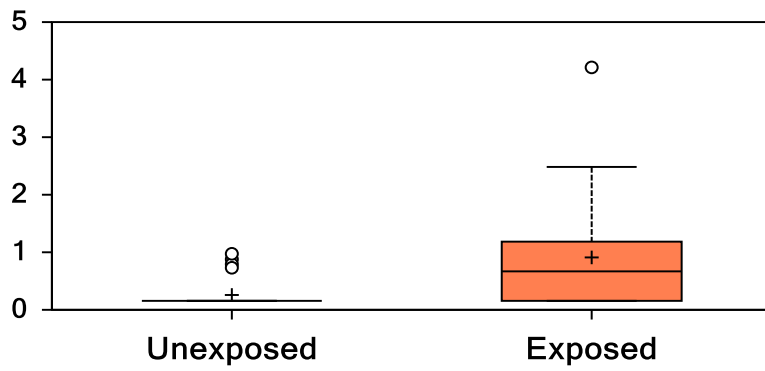

### diaminopimelate

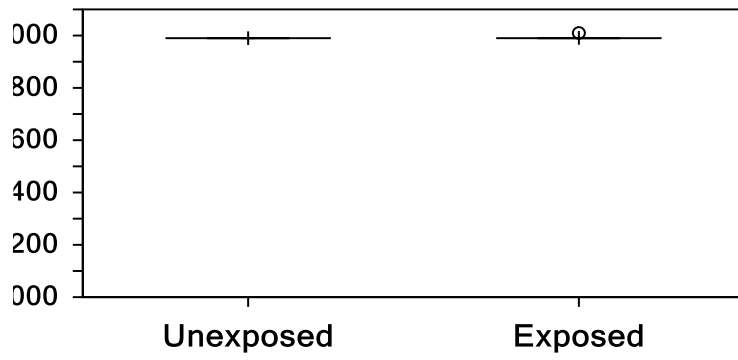

### pipecolate

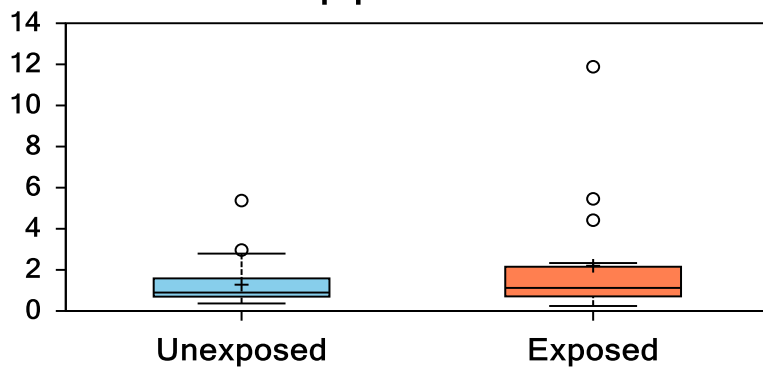

### N6-acetyllysine

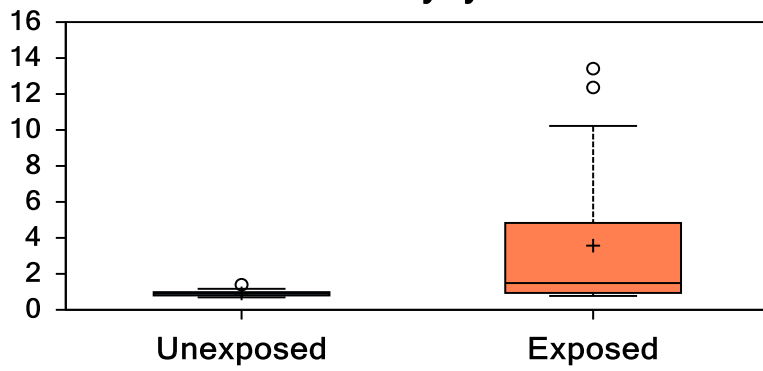

phenylalanine

:

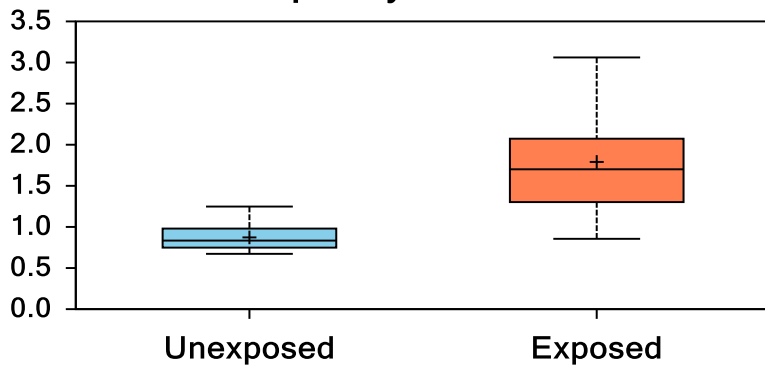

p-cresol sulfate

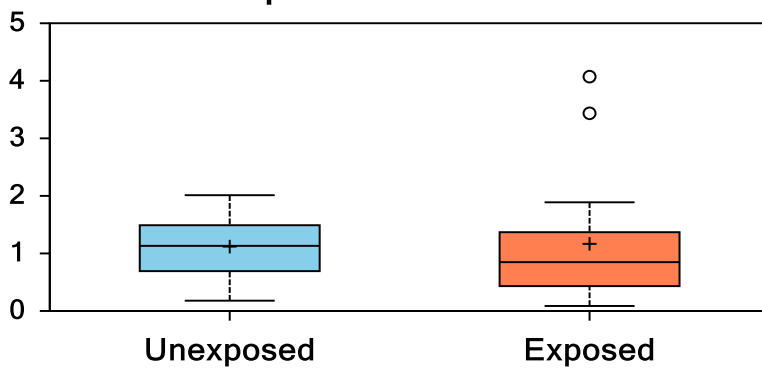

gentisate

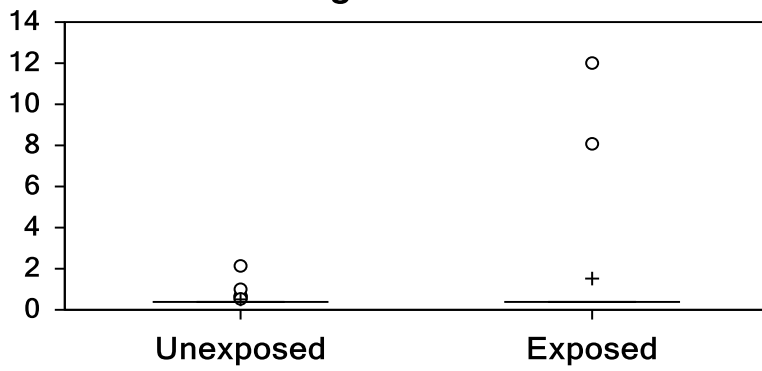

vanillylmandelate (VMA)

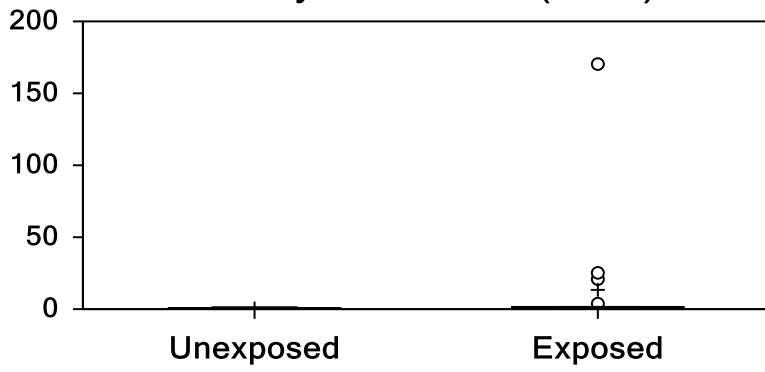

homovanillate (HVA)

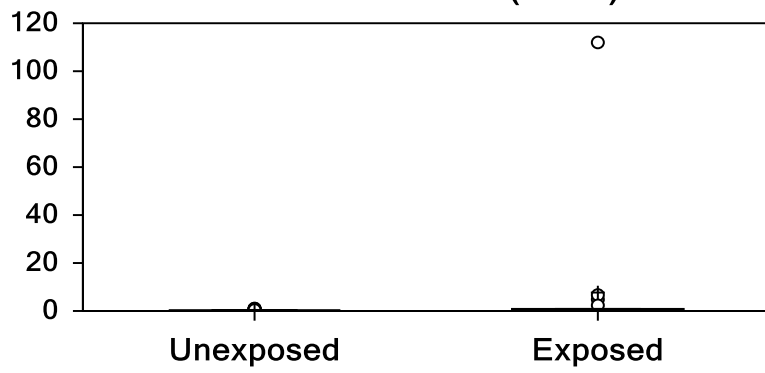

N-acetylphenylalanine

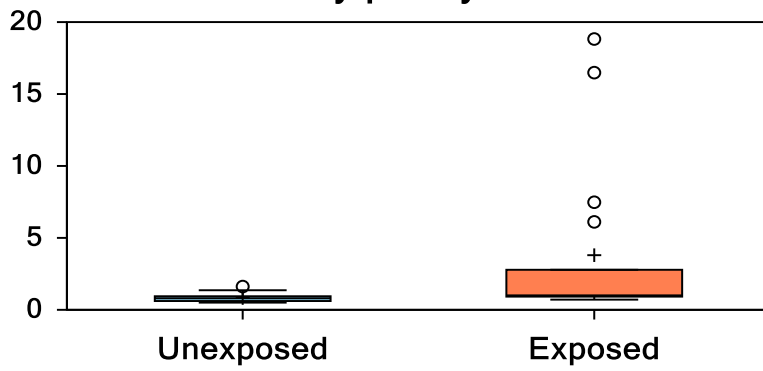



### 3-phenylpropionate (hydrocinnamate)

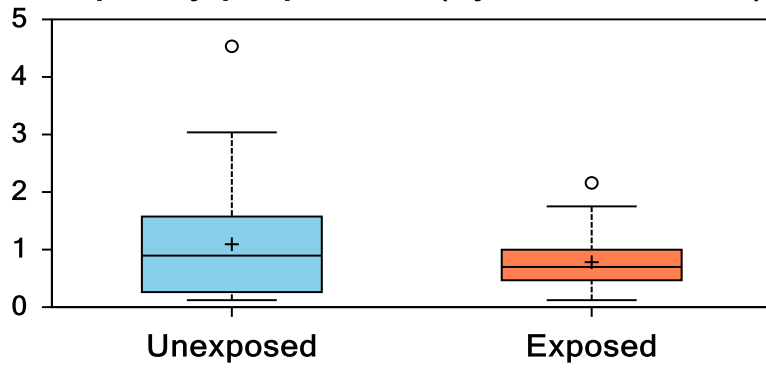

### kynurenate

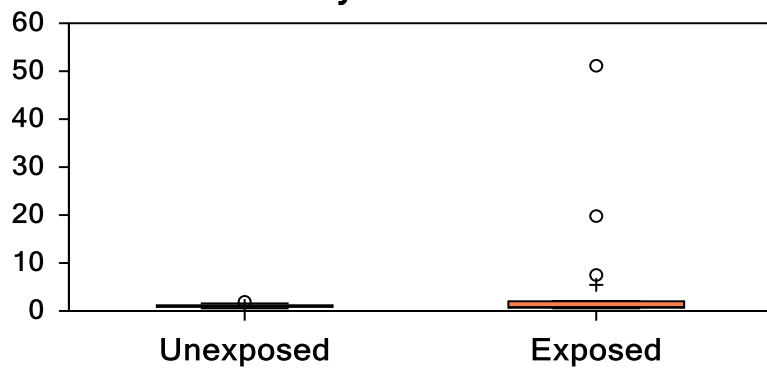

### indolelactate

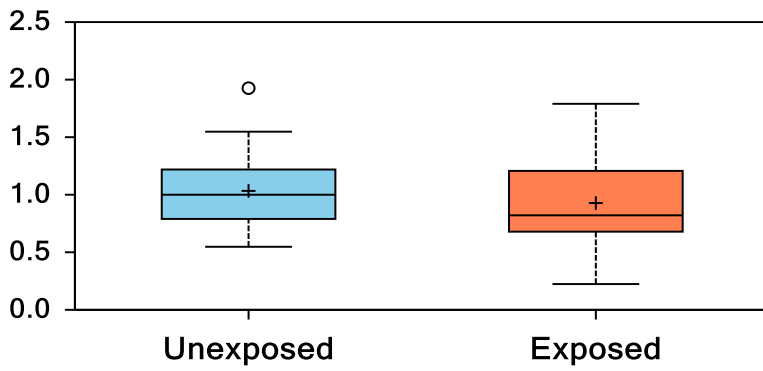

### indole-3-carboxylic acid

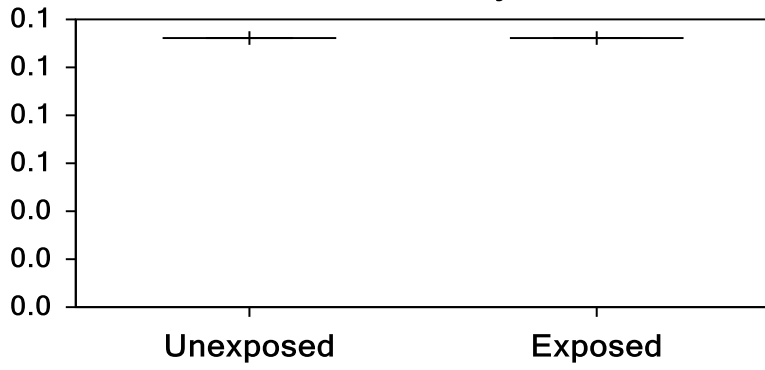

### 3-hydroxykynurenine

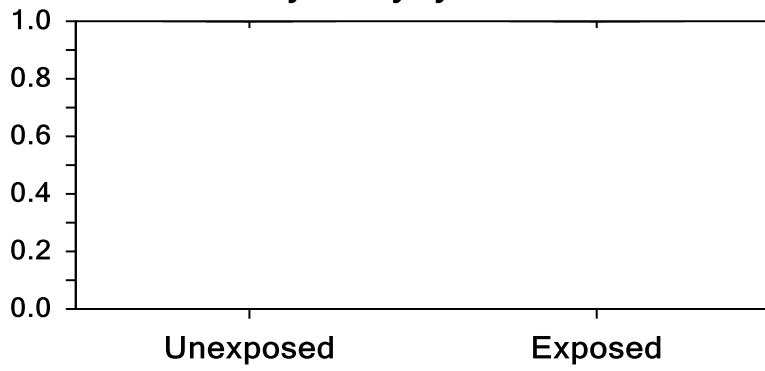

### N-acetyltryptophan

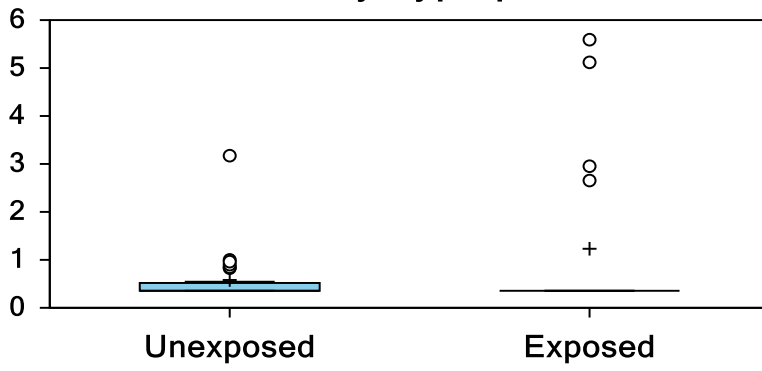

### 3-indoxyl sulfate

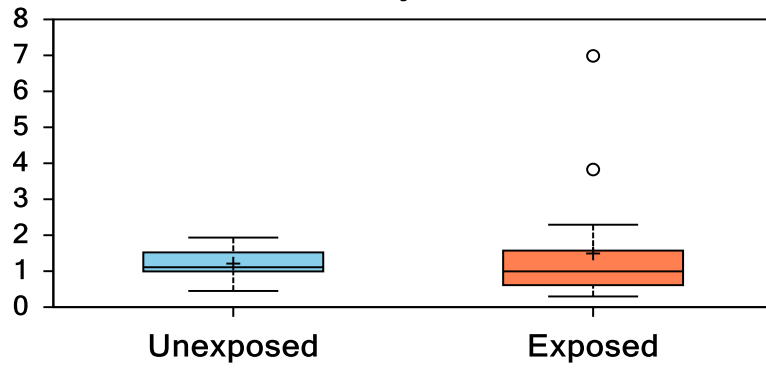

### 3-methyl-2-oxovalerate

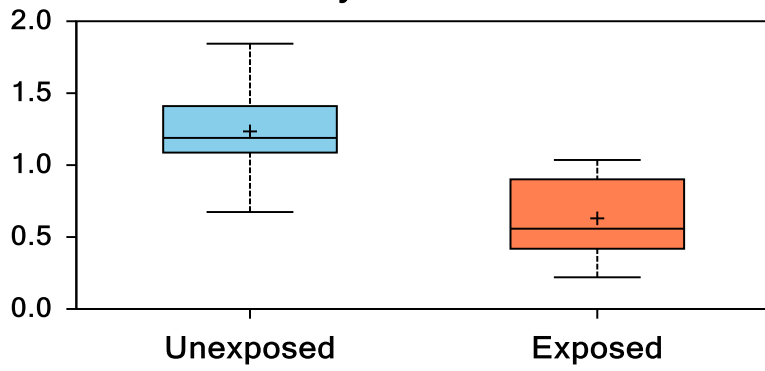

### alpha-hydroxyisocaproate

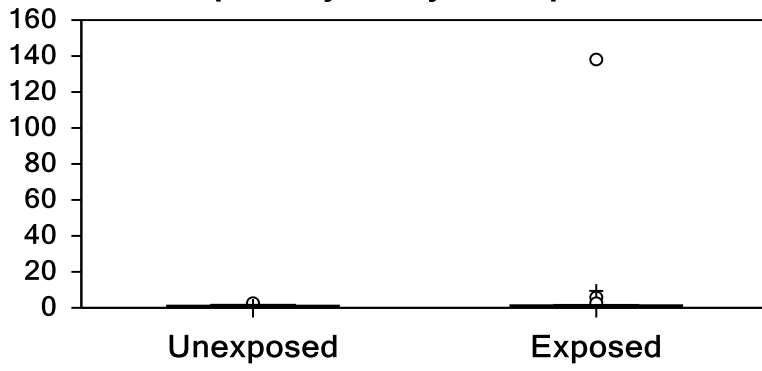

### N-acetylleucine

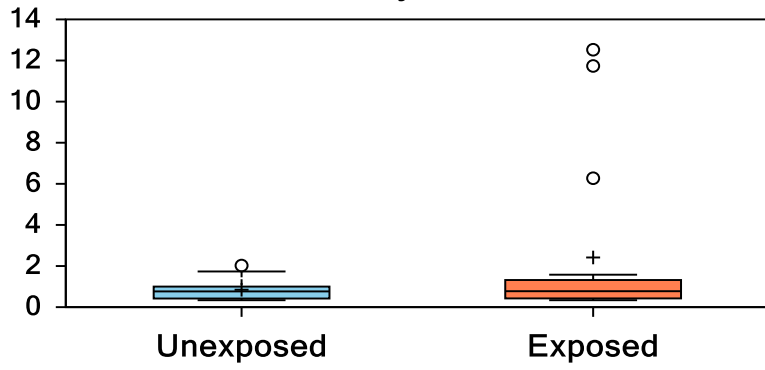

### tigloylglycine

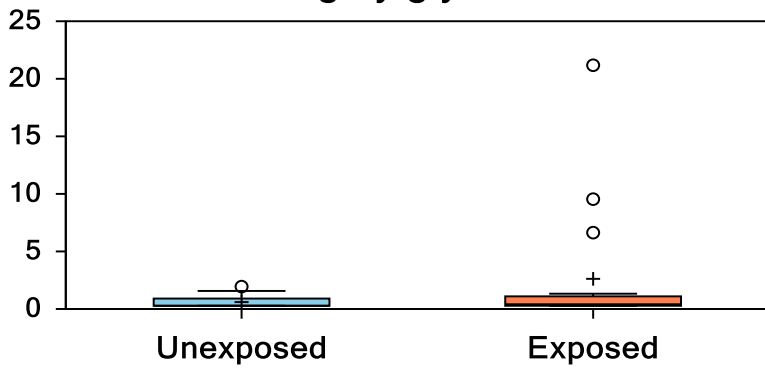

### 3-hydroxyisobutyrate

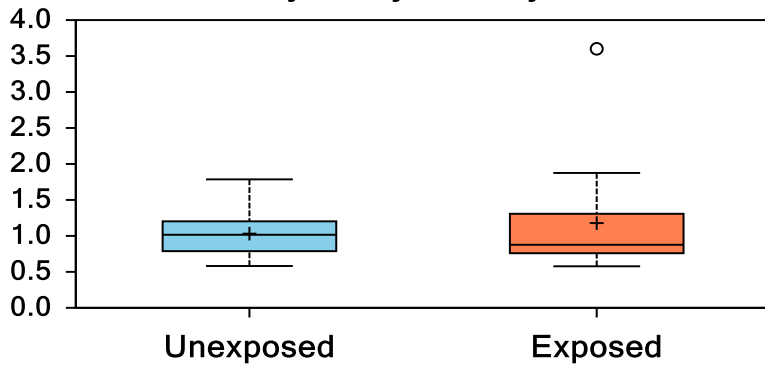

### alpha-hydroxyisovalerate

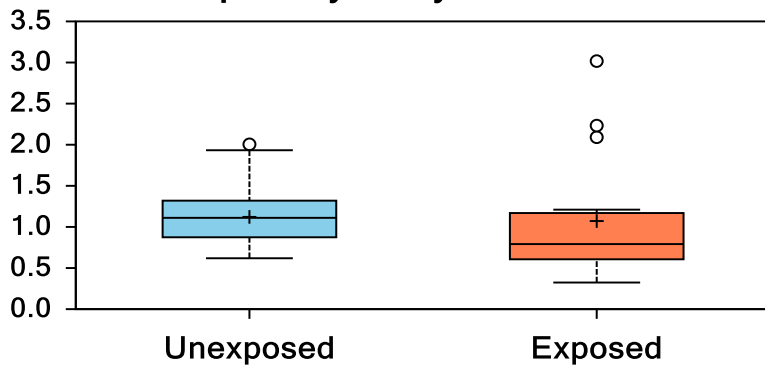

### 2-hydroxy-3-methylvalerate

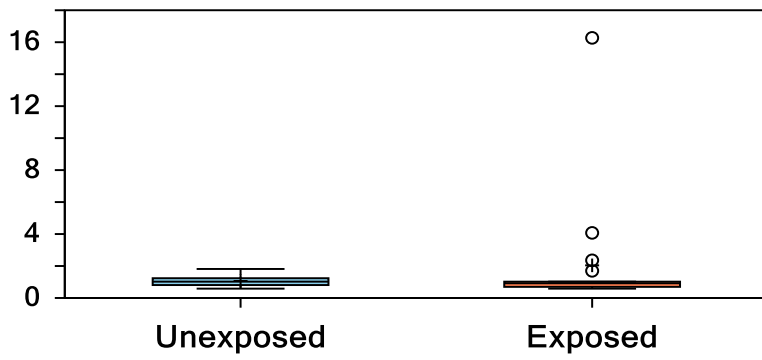

### hydroxyisovaleroyl carnitine

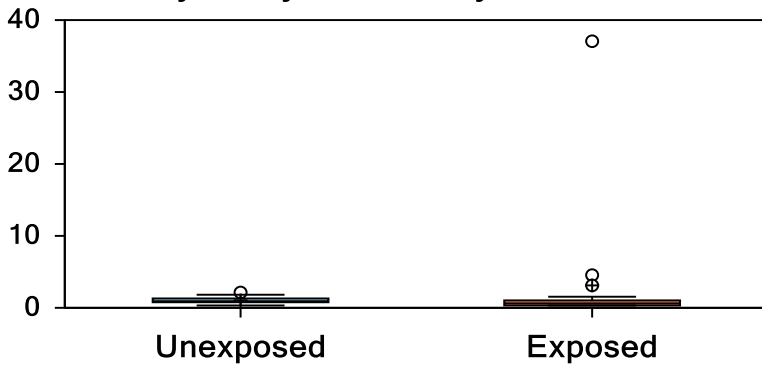

### citramalate

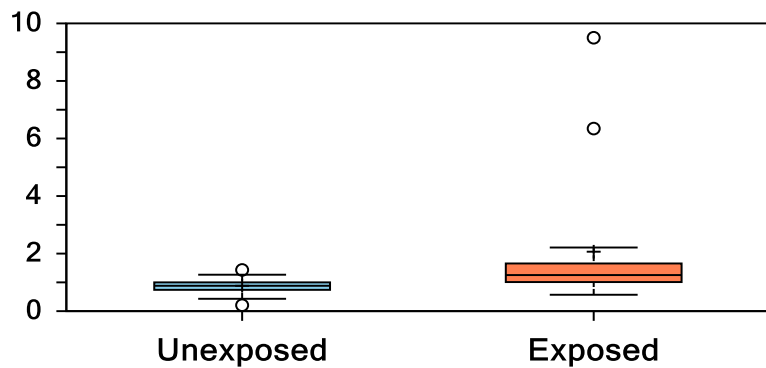

### cystine

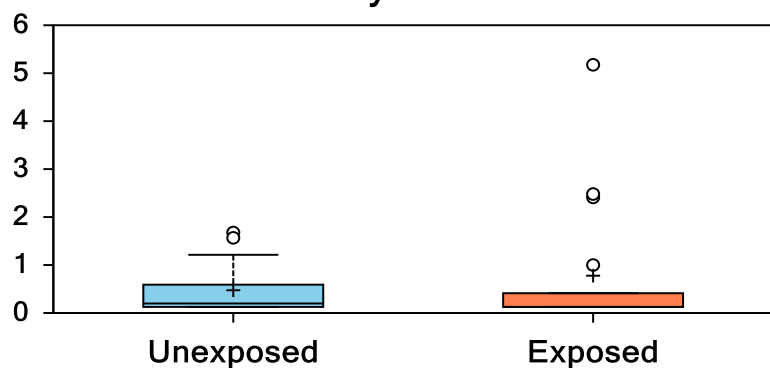

### methionine

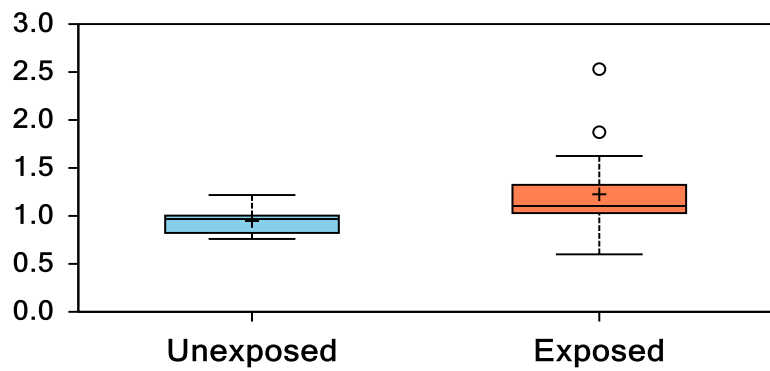

### 2-hydroxybutyrate (AHB)

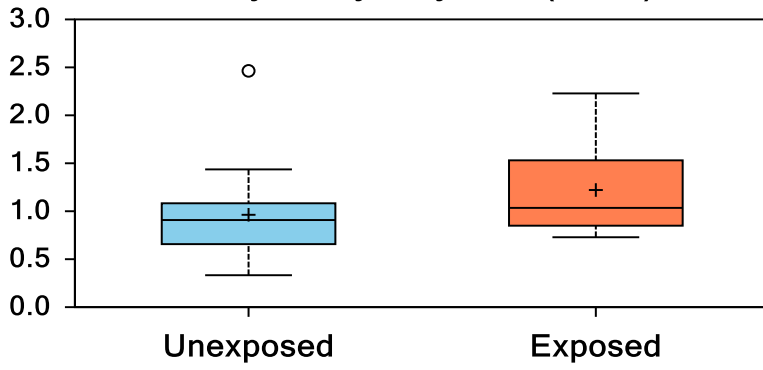

### 3-methylthiopropionate

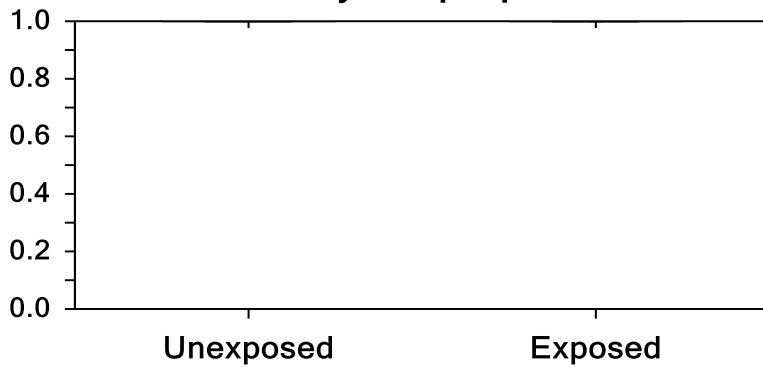

### arginine

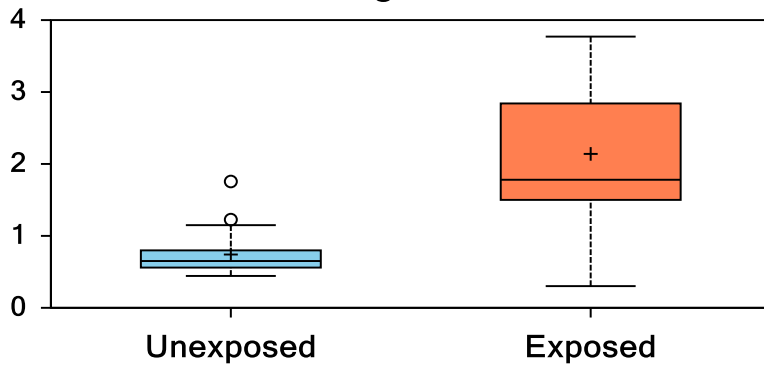

### proline

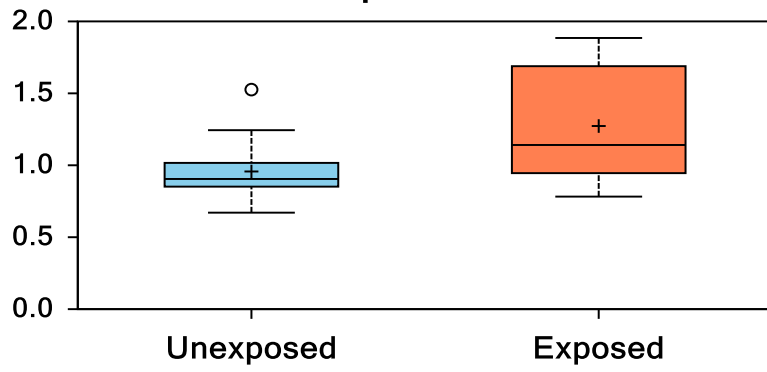

### N-acetylornithine

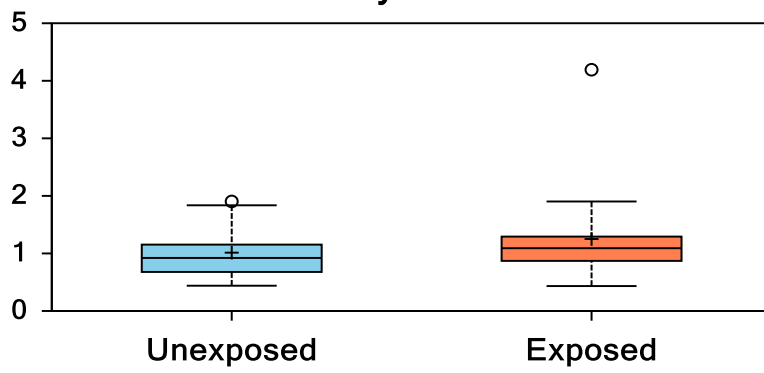

### homocitrulline

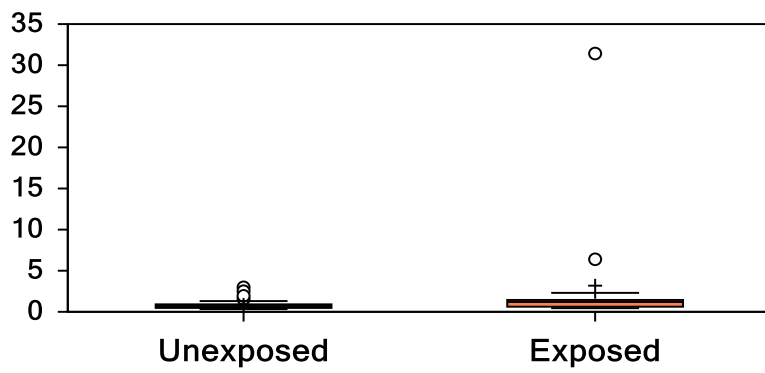



**2-aminobutyrate**

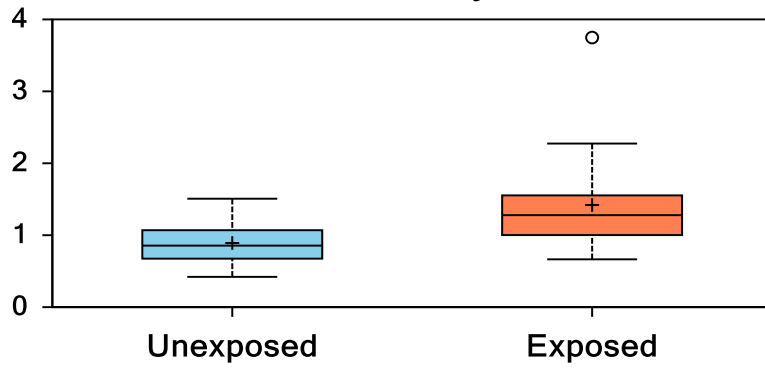

**4-guanidinobutanoate**

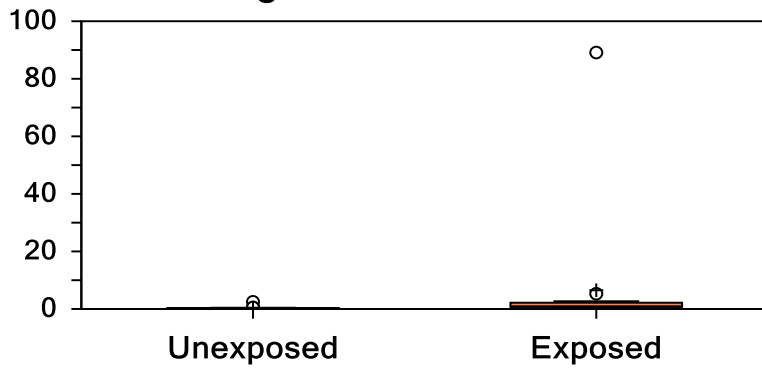

**glutathione, oxidized (GSSG)**

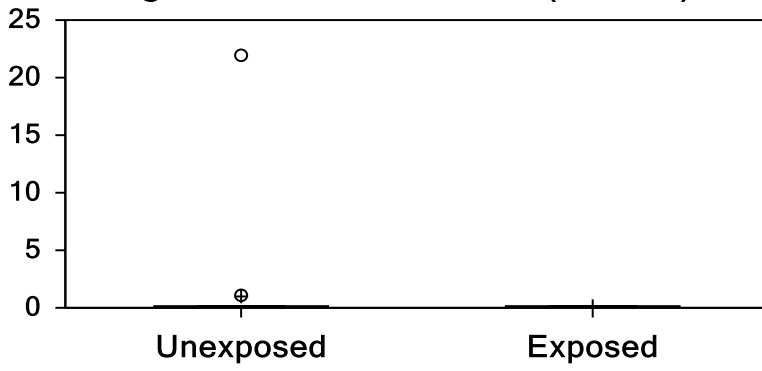

glycylleucine

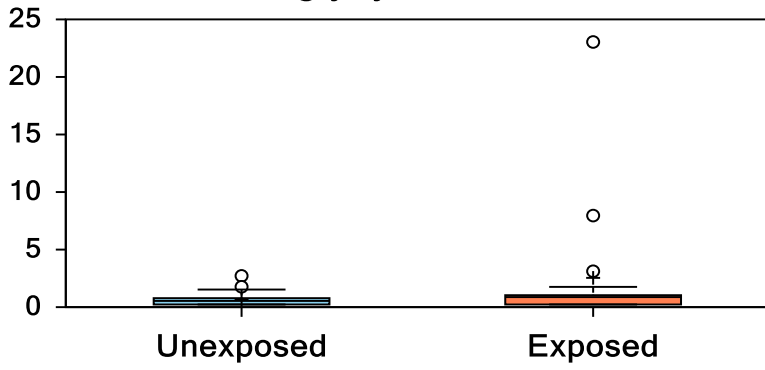

glycyltryptophan

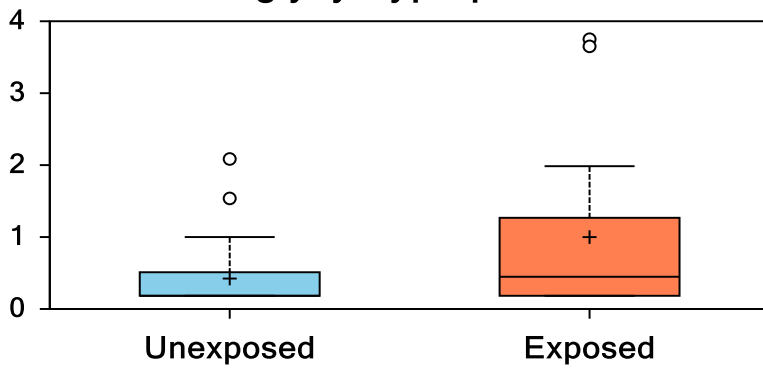

alanylarginine

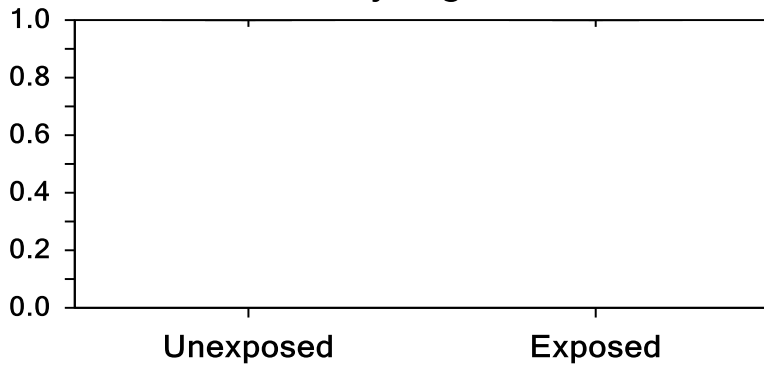

### prolylleucine

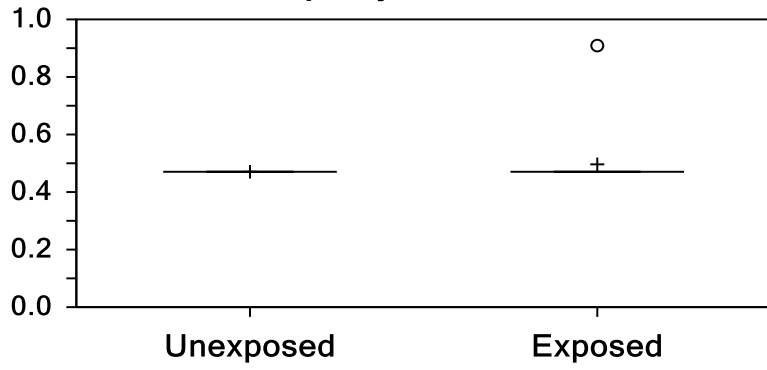

### isoleucylproline

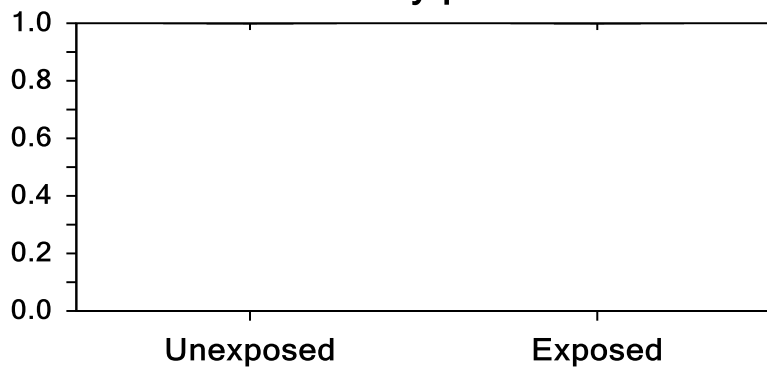

### leucylleucine

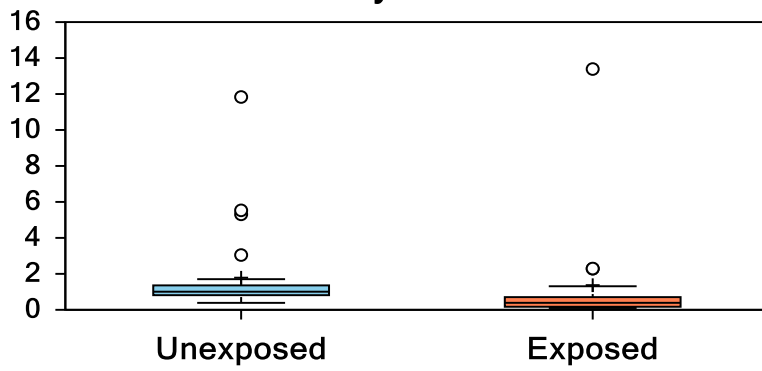

### threonylphenylalanine

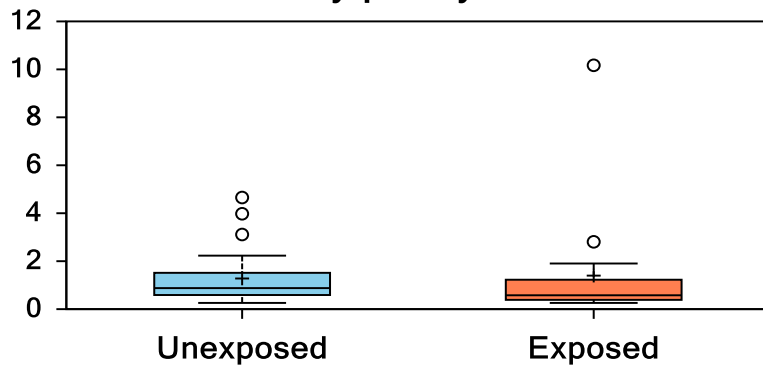

### pyroglutamylglutamine

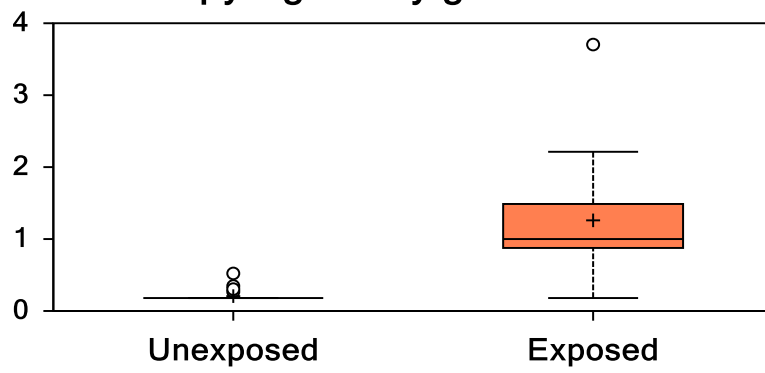

### valylserine

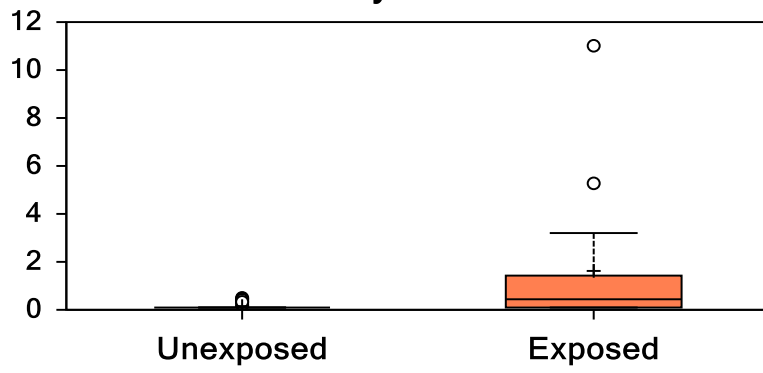

valylphenylalanine

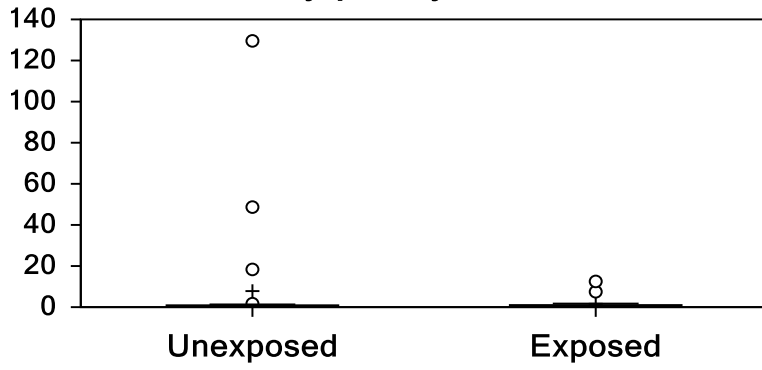

cyclo(leu-pro)

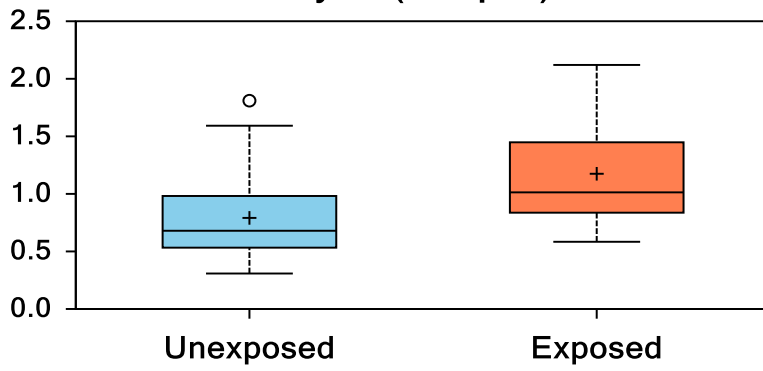

arginylisoleucine

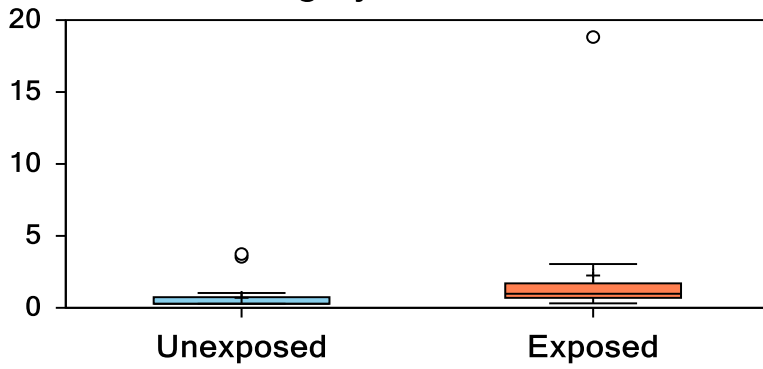

### methionylleucine

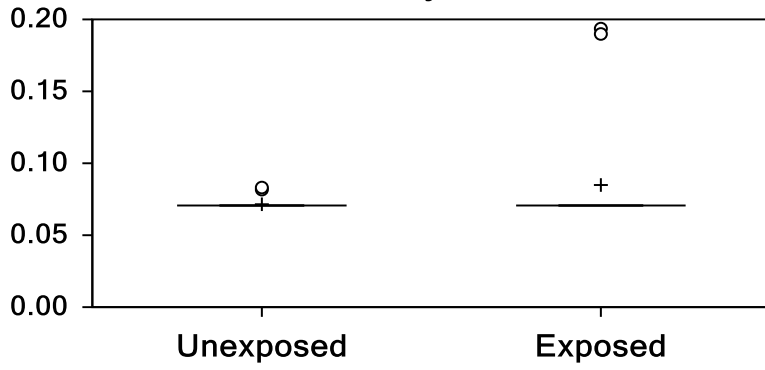

### isoleucylglutamate

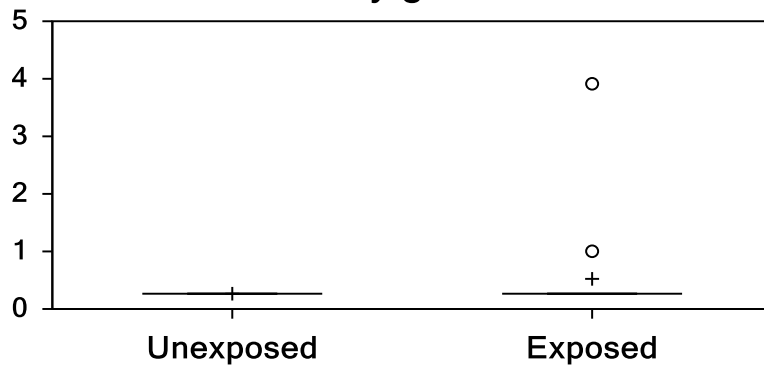

### isoleucylmethionine

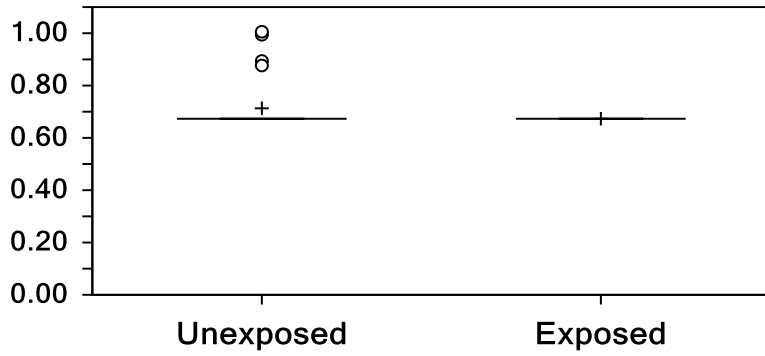

### isoleucylvaline

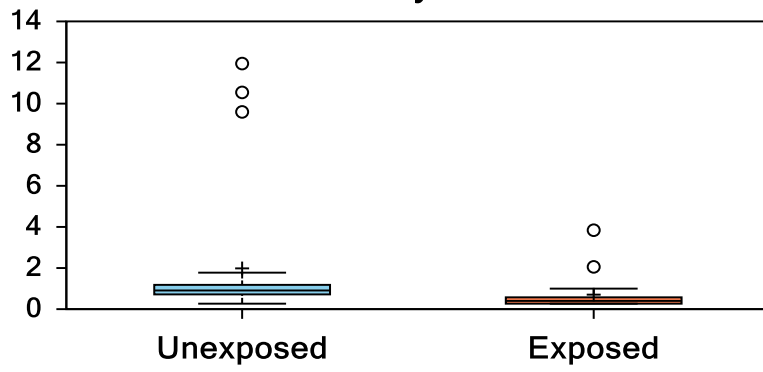

### leucylasparagine

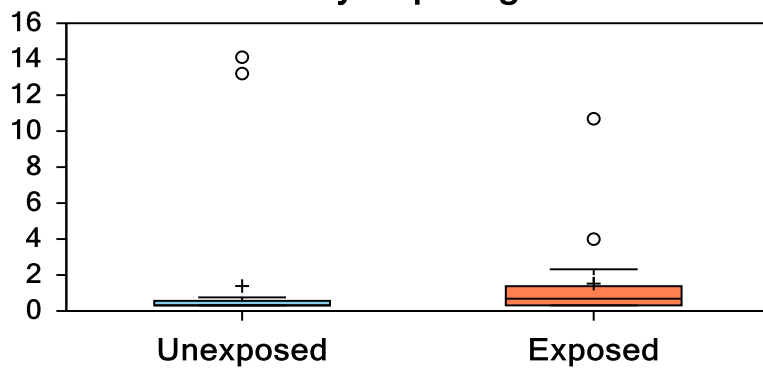

### leucylglycine

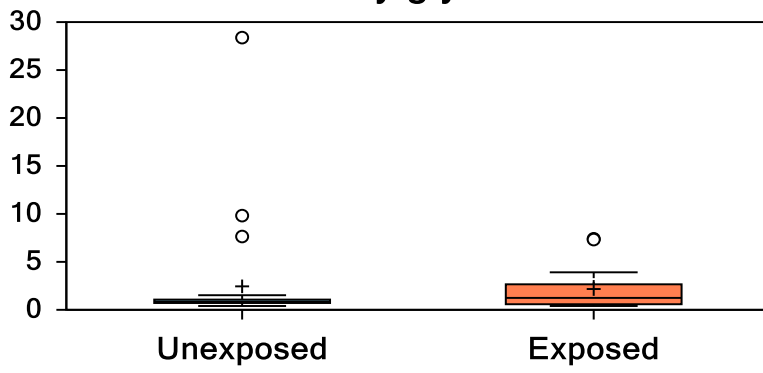

### leucyltryptophan

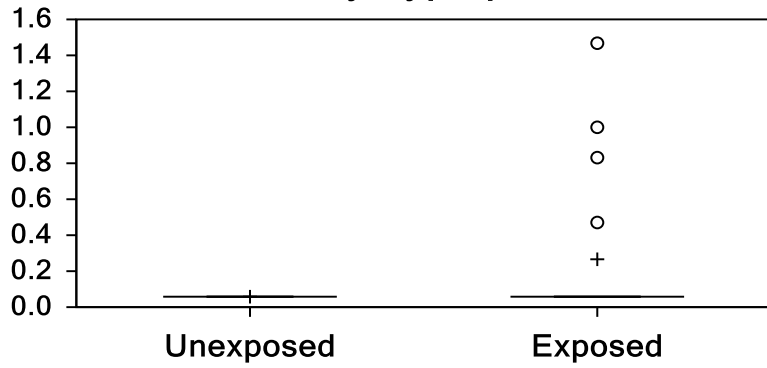

### phenylalanylleucine\*

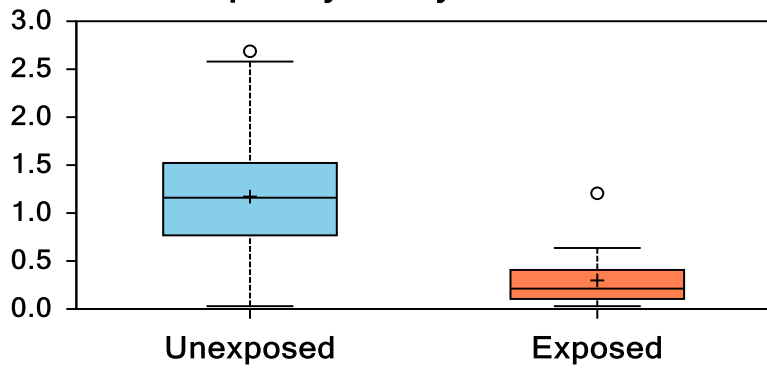

### serylleucine

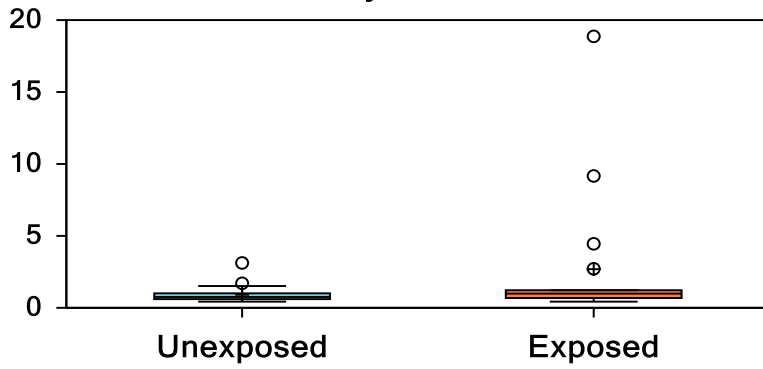



tryptophylleucine

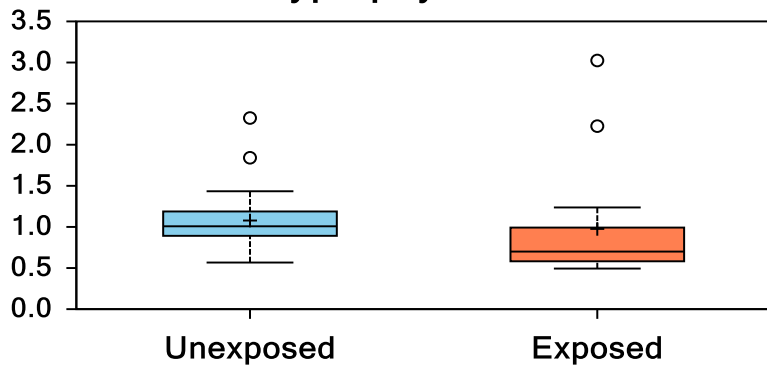

tryptophylasparagine

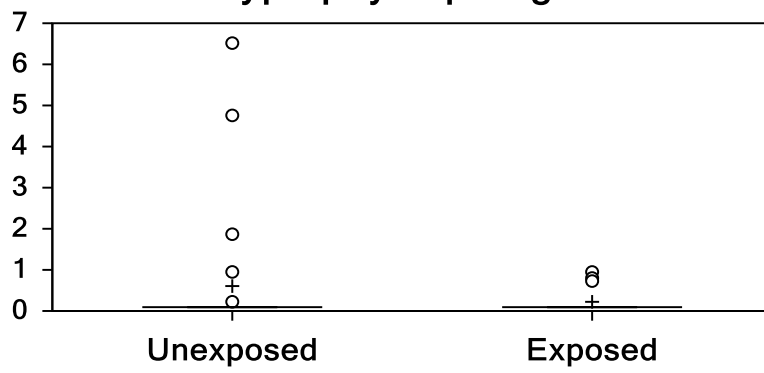

serylisoleucine\*

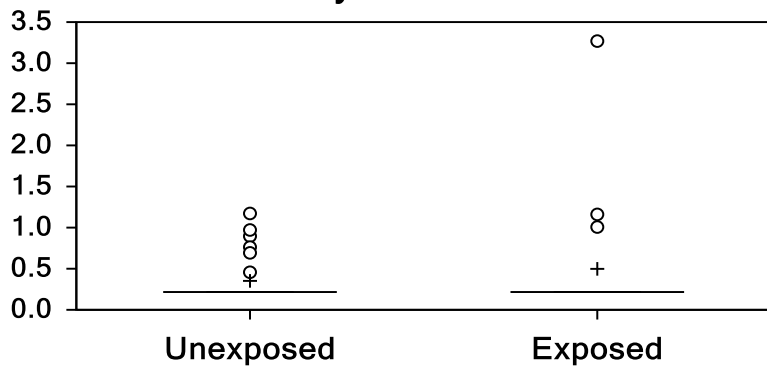

prolylproline

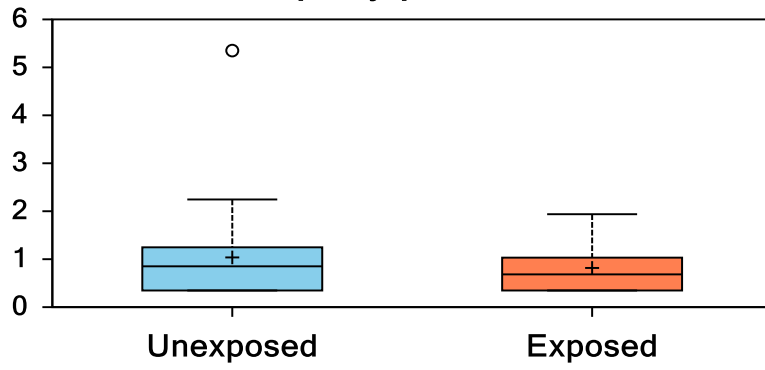

gamma-glutamylvaline

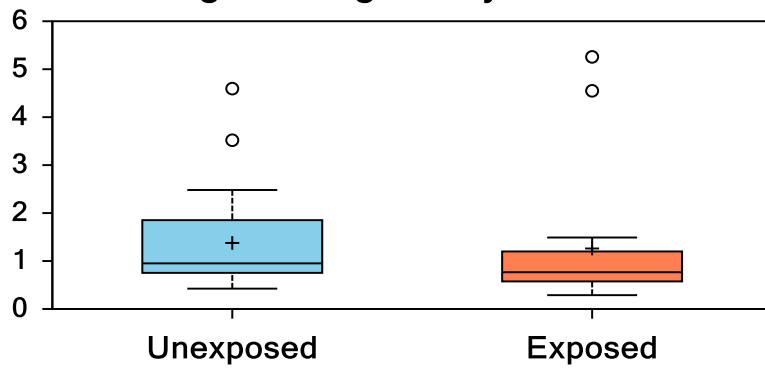

gamma-glutamylmethionine

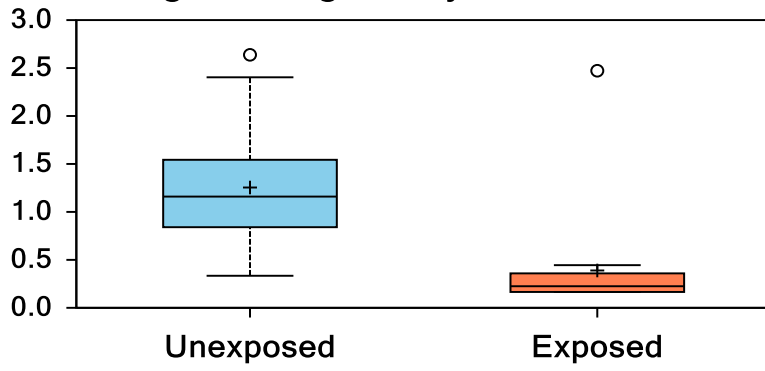

**gamma-glutamylphenylalanine**

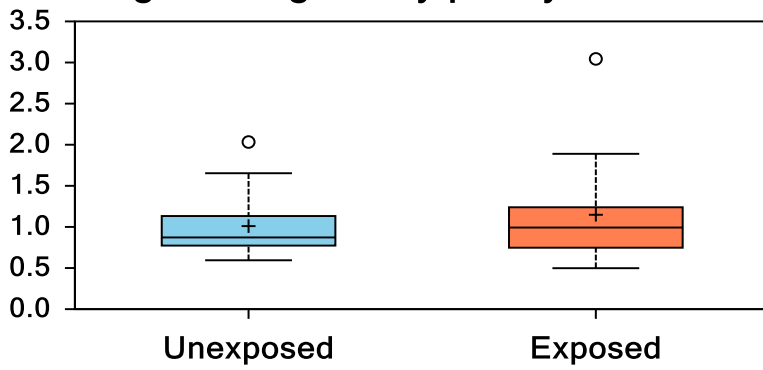

**gamma-glutamyltryptophan**

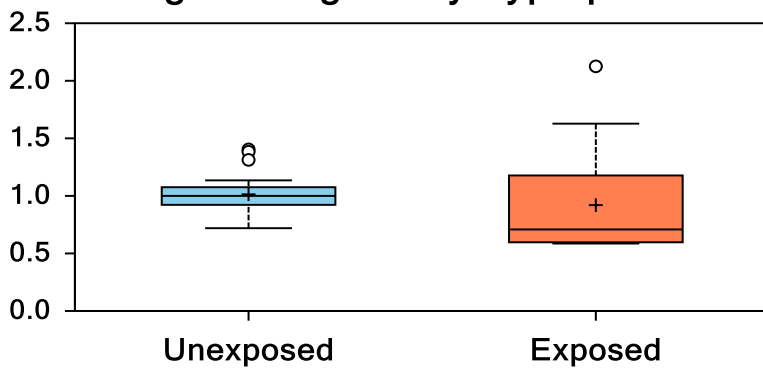

**bradykinin, hydroxy-pro(3)**

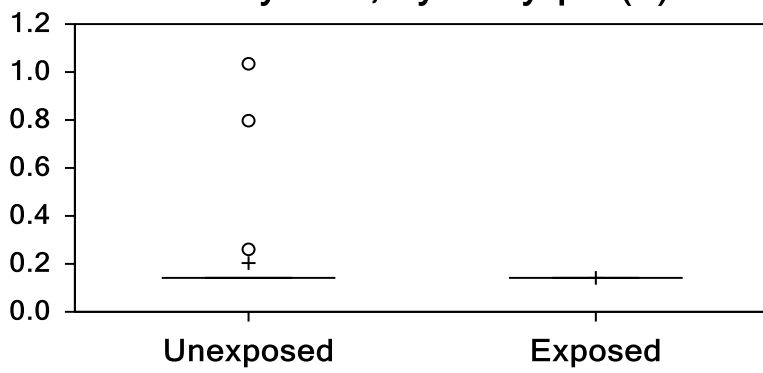

**HWESASXX\***

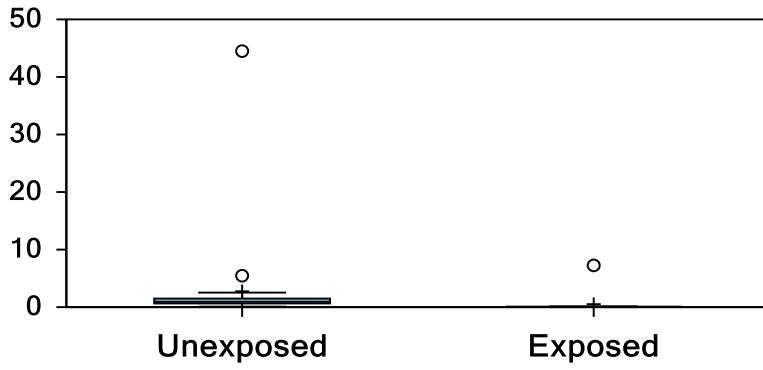

**ADSGEGDFXAEGGGVR\***

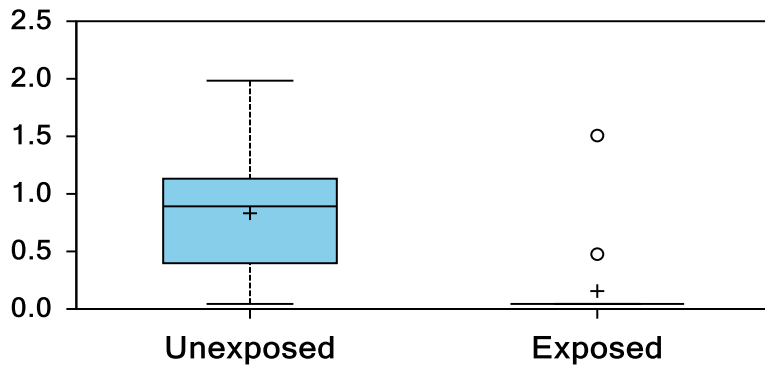

**N-acetylgalactosamine**

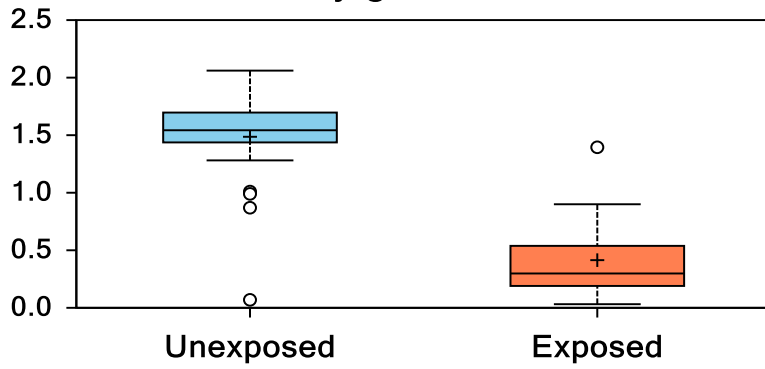

**N-acetylneuraminate**

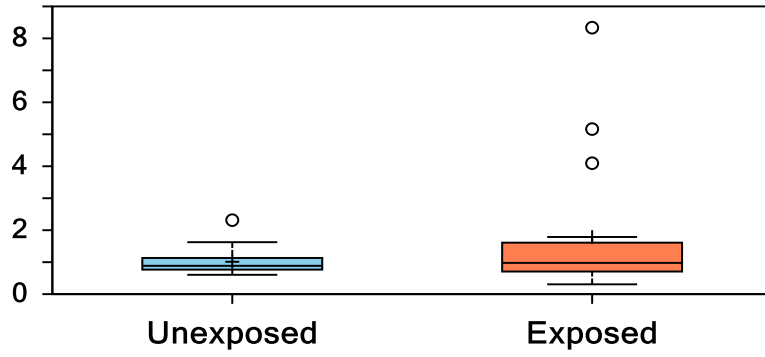

**lactose**

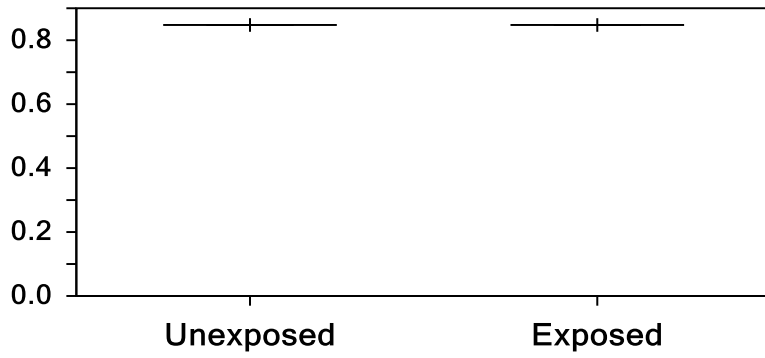

**mannose**

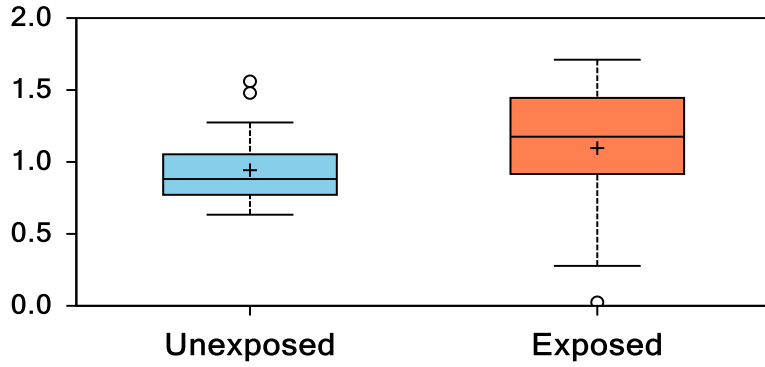

**maltotriose**

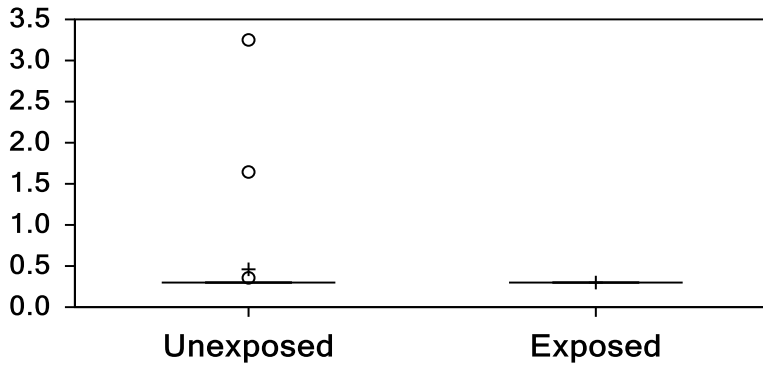

**glycerate**

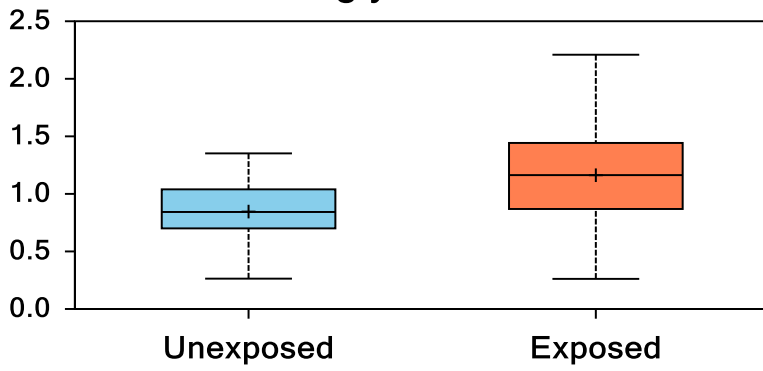

**2,3-diphosphoglycerate**

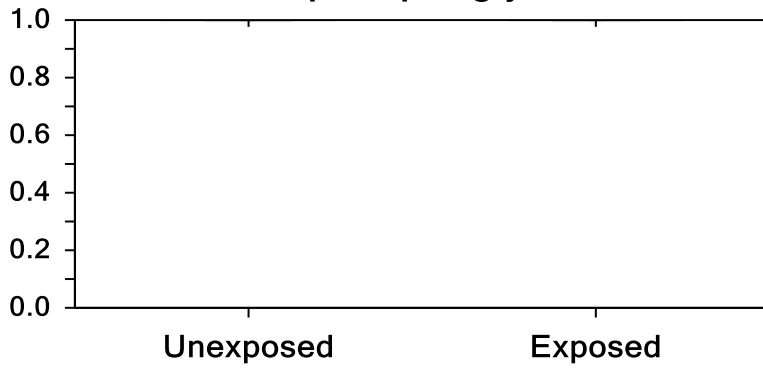

### glucuronate

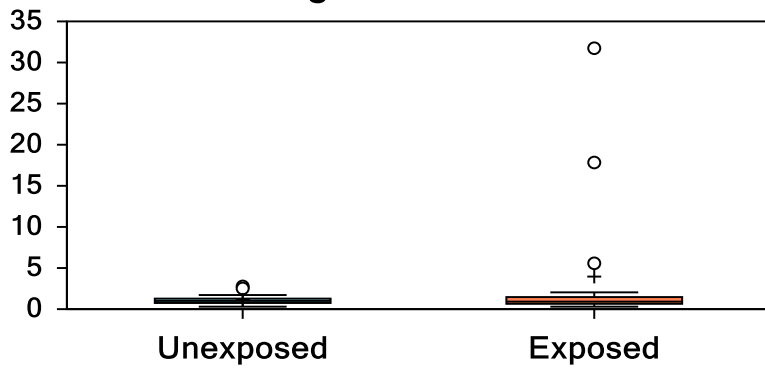

### ribitol

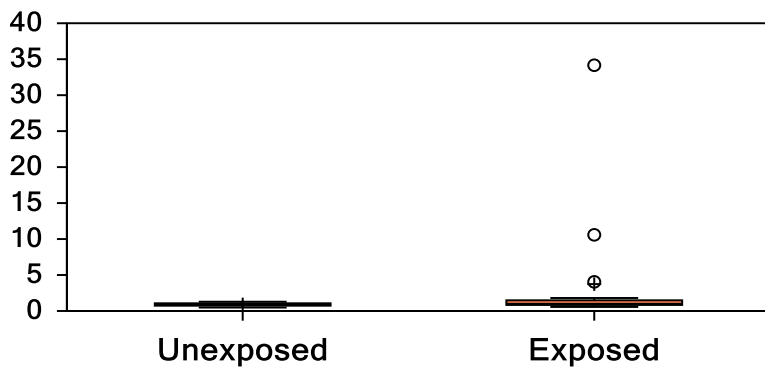

### ribose

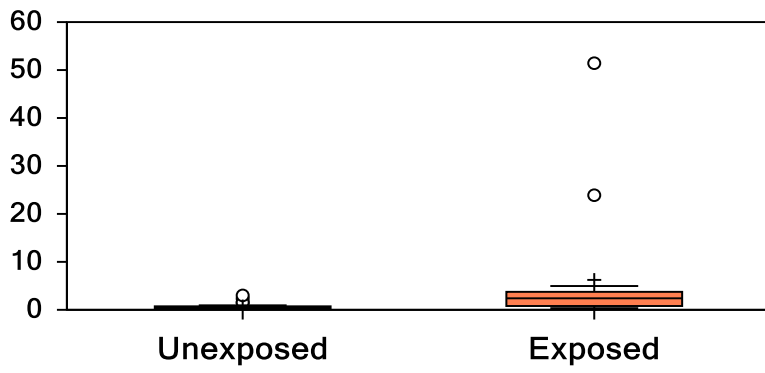

### xylose

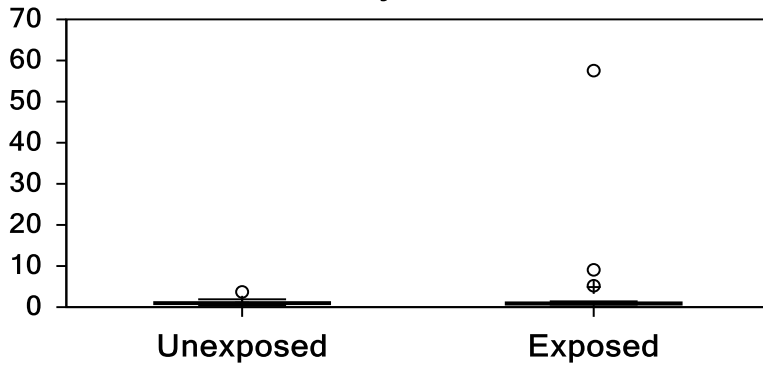

### 2-methylcitrate

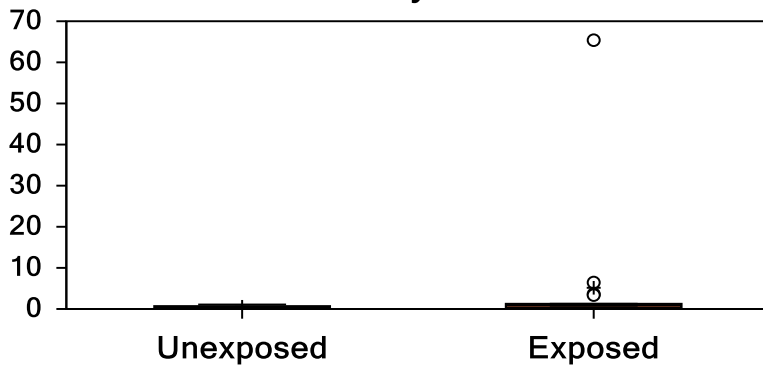

### succinate

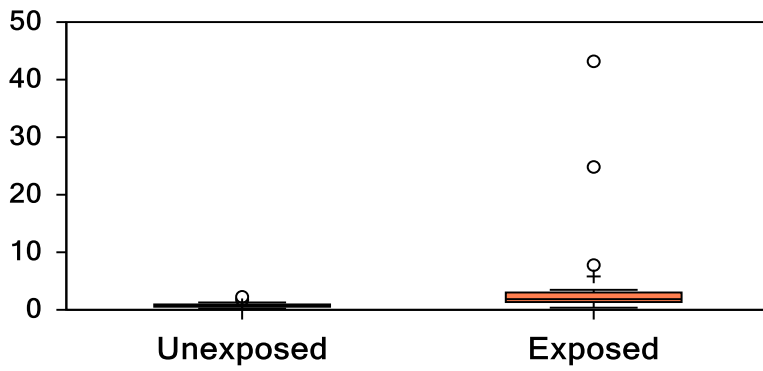



### malate

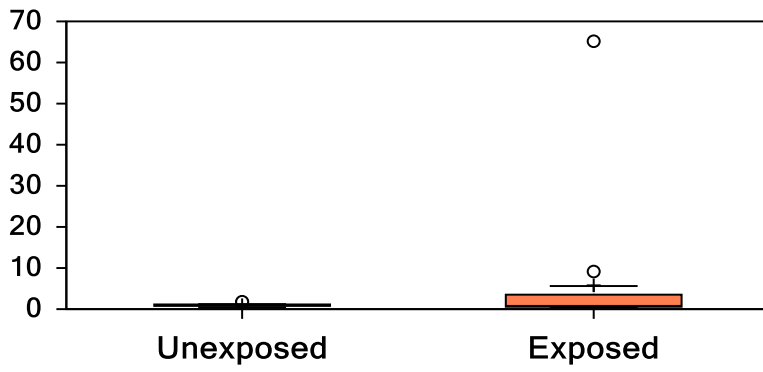

### linoleate (18:2n6)

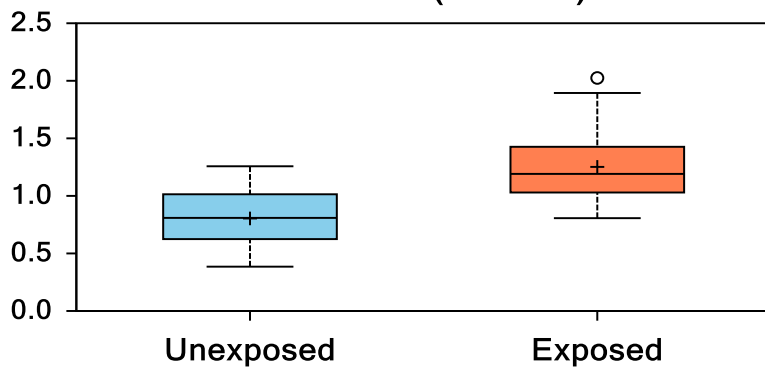

### eicosapentaenoate (EPA; 20:5n3)

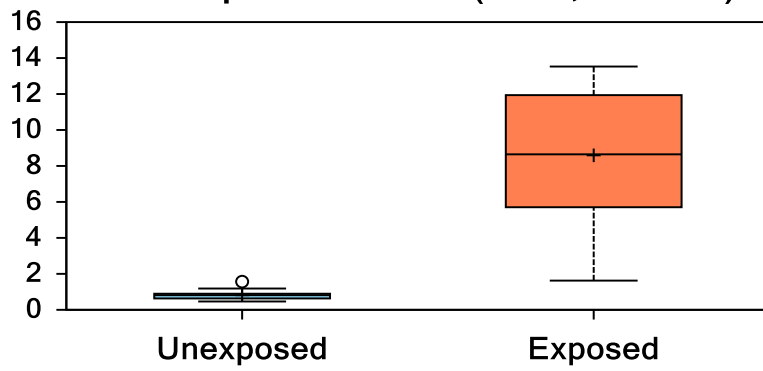

docosahexaenoate (DHA; 22:6n3)

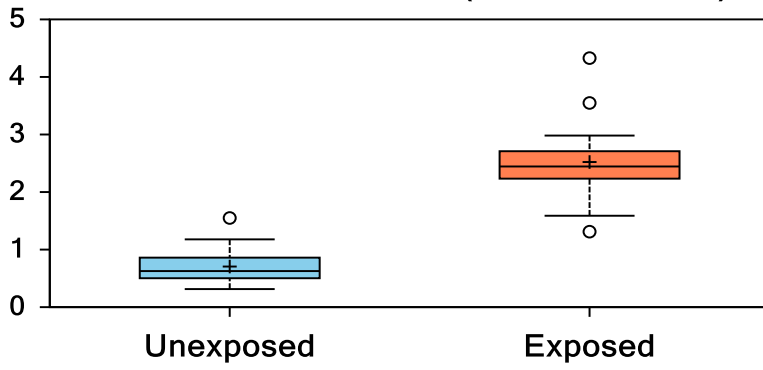

heptanoate (7:0)

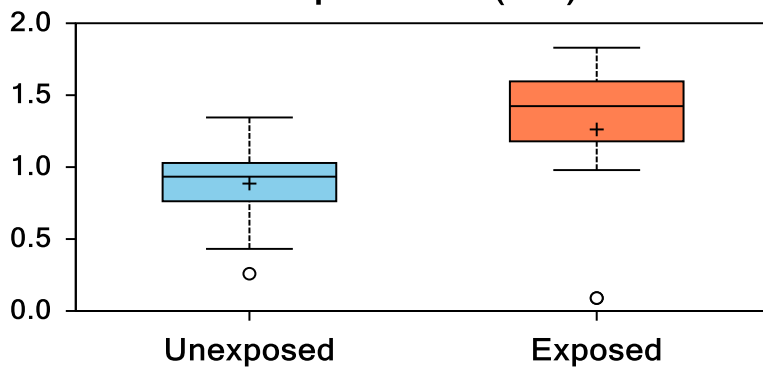

caprate (10:0)

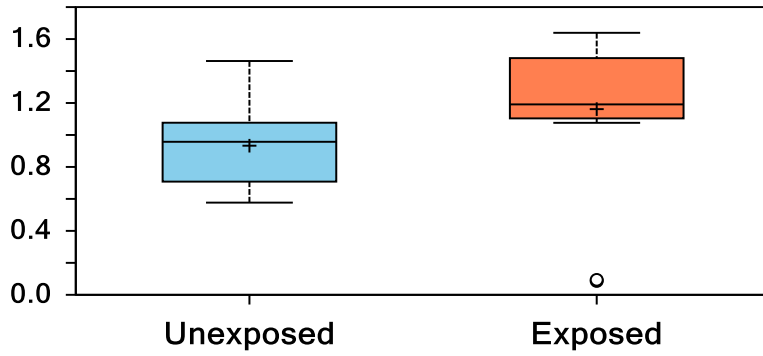

**laurate (12:0)**

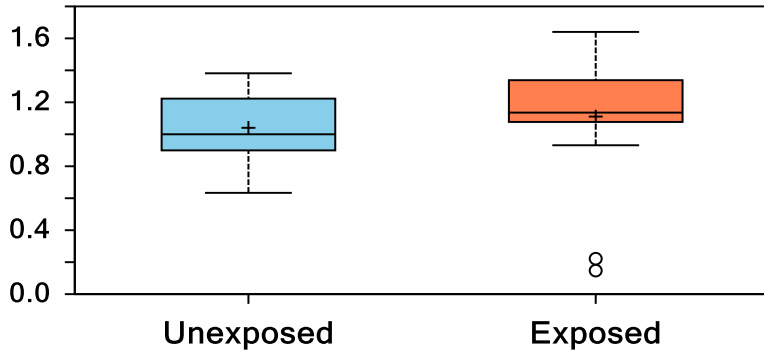

**myristoleate (14:1n5)**

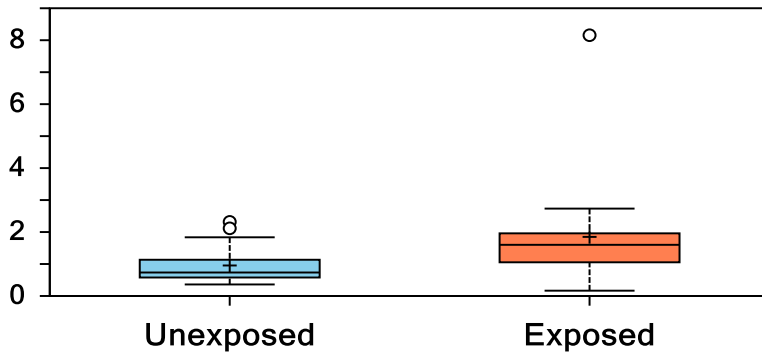

**palmitoleate (16:1n7)**

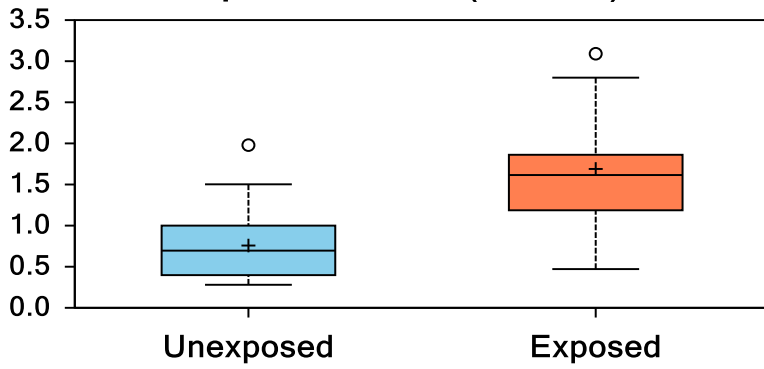

stearate (18:0)

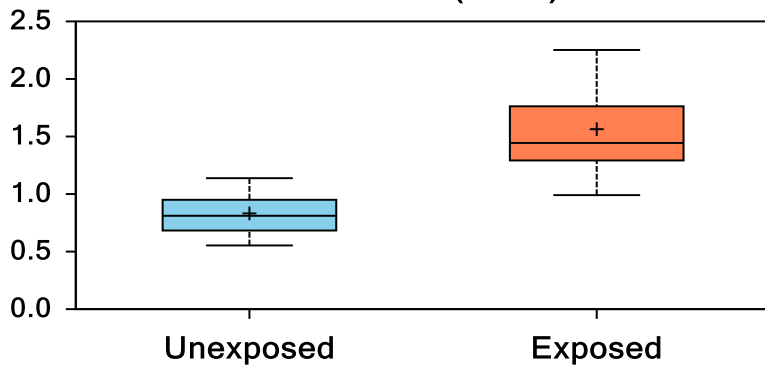

stearidonate (18:4n3)

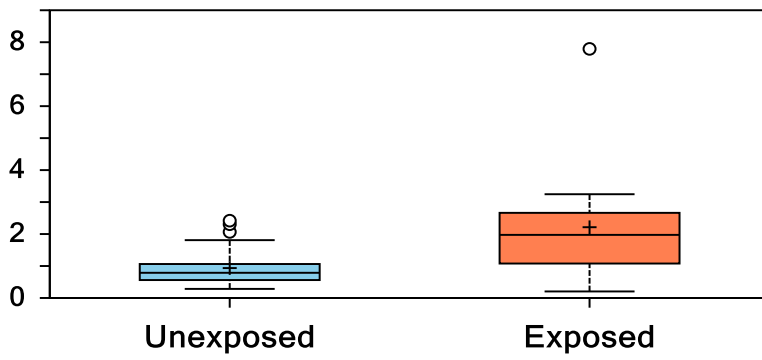

eicosenoate (20:1n9 or 11)

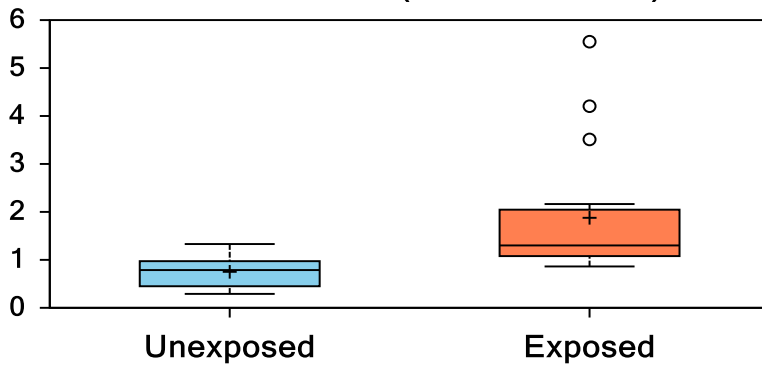

docosadienoate (22:2n6)

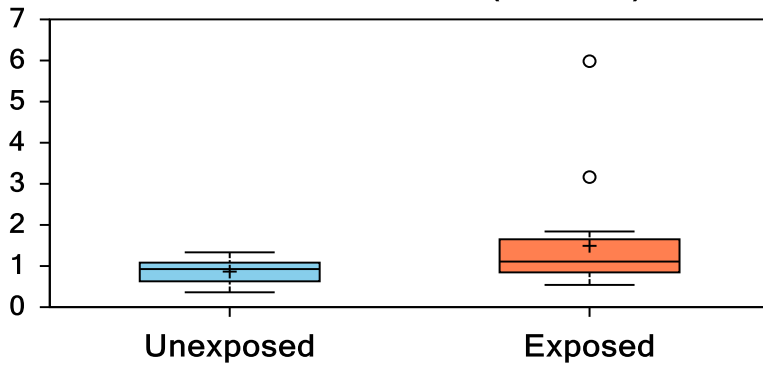

9,10-epoxystearate

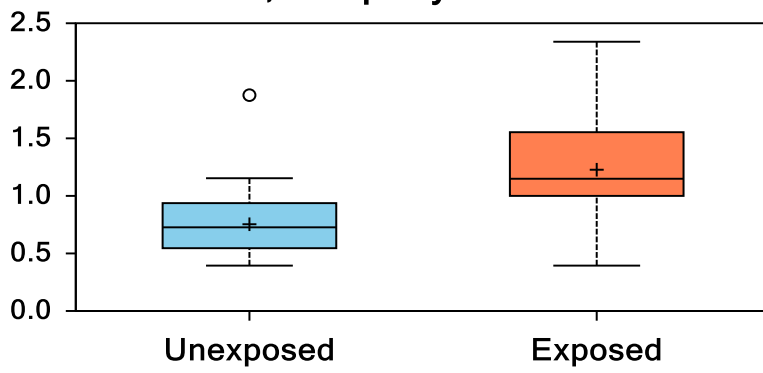

4-hydroxybutyrate (GHB)

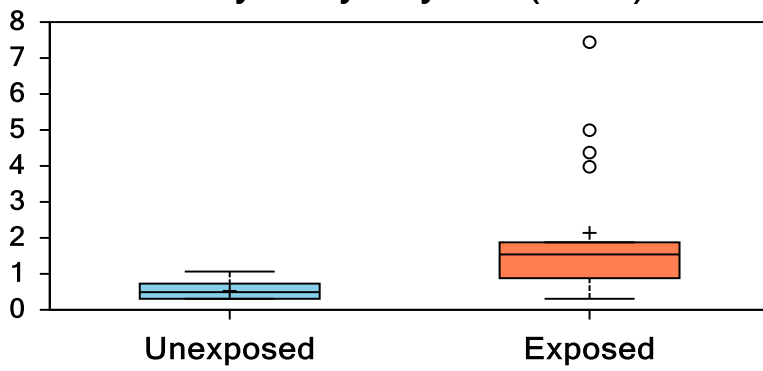

### 3-hydroxydecanoate

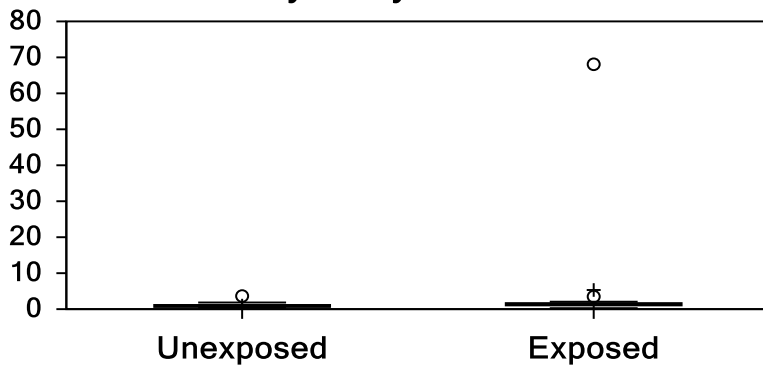

### 13-HODE

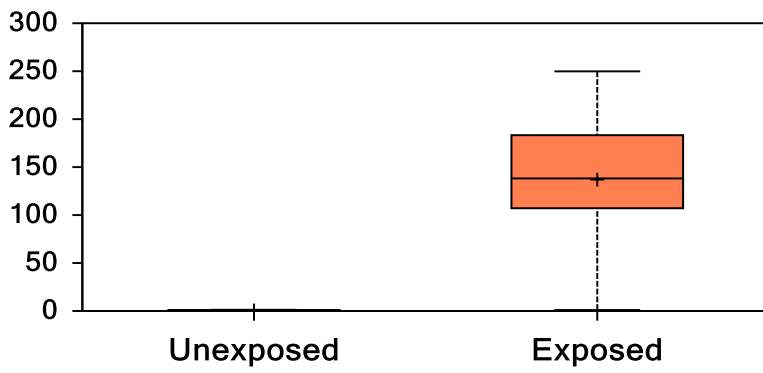

### adipate

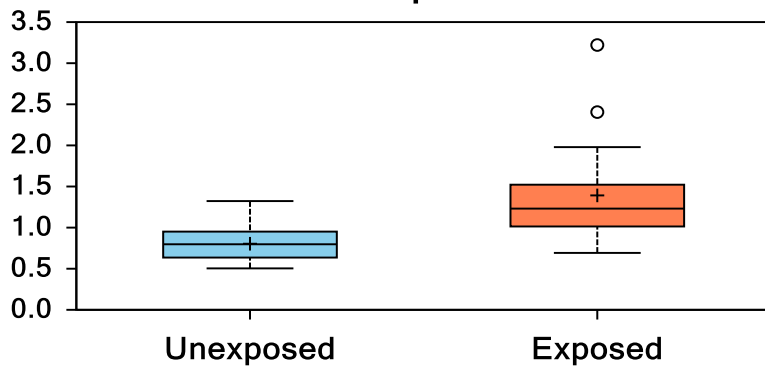

suberate (octanedioate)

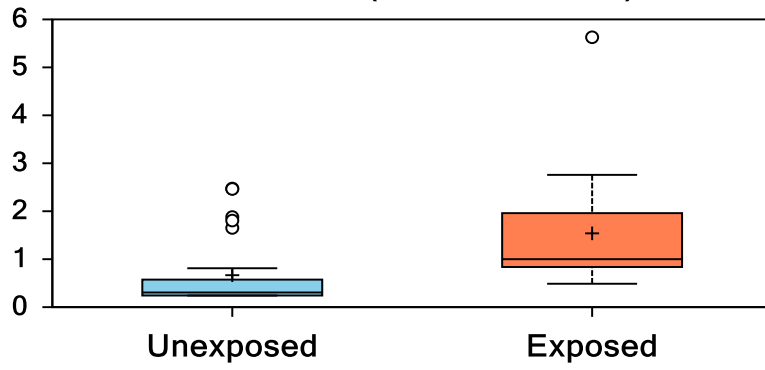

dodecanedioate

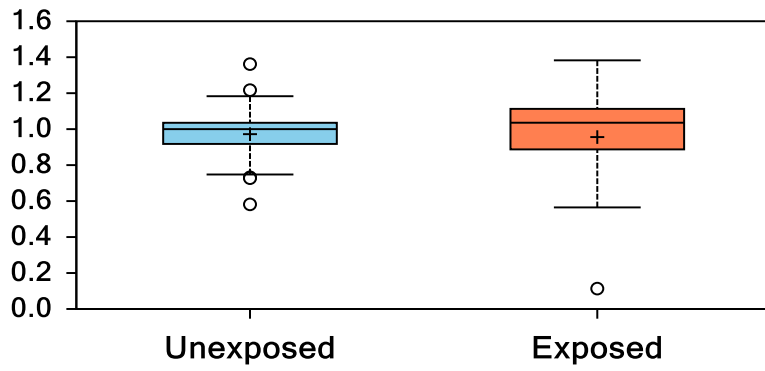

octadecanedioate

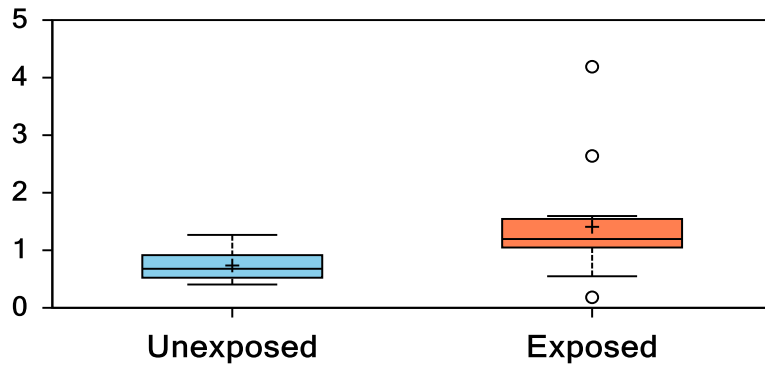

### 2-hydroxyadipate

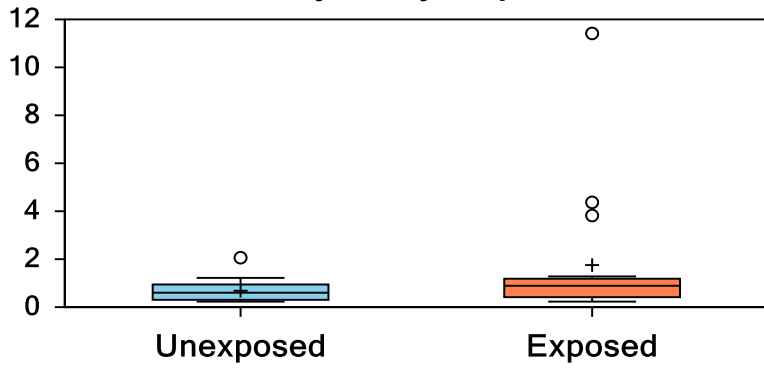

### methylpalmitate (isobar with 2-methylpalmit)

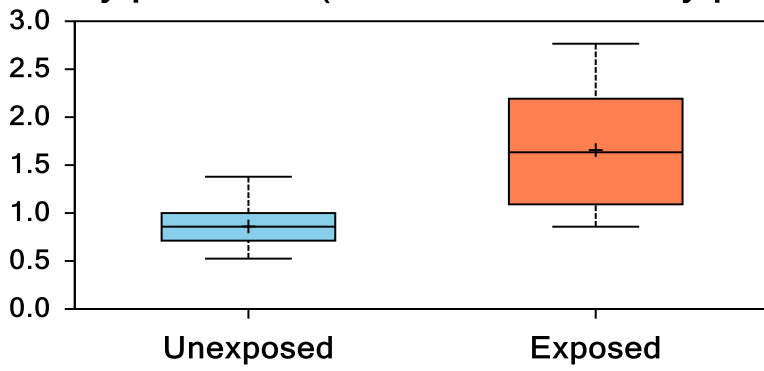

### leukotriene B4

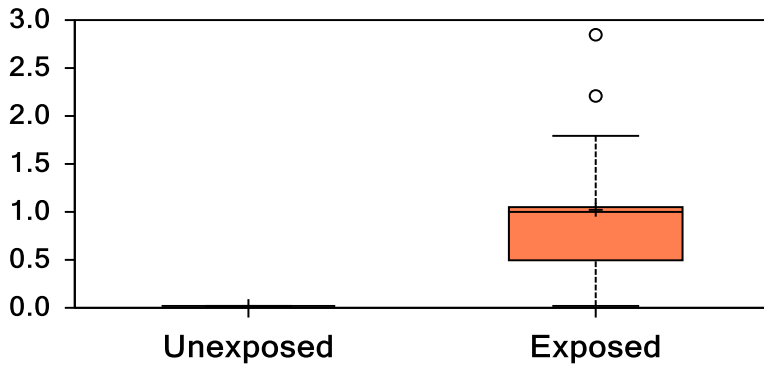



### 5-HEPE

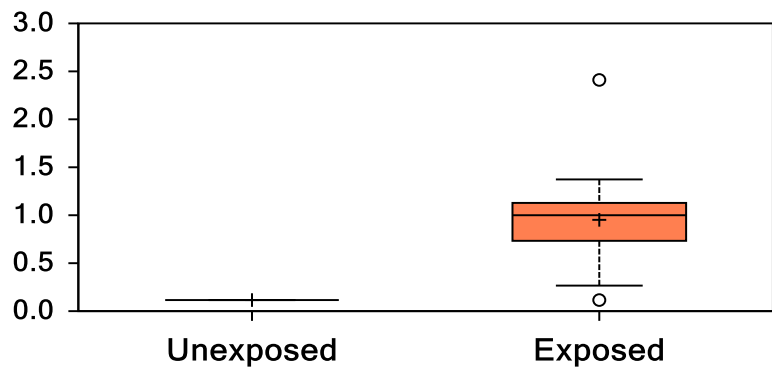

### 9-HETE

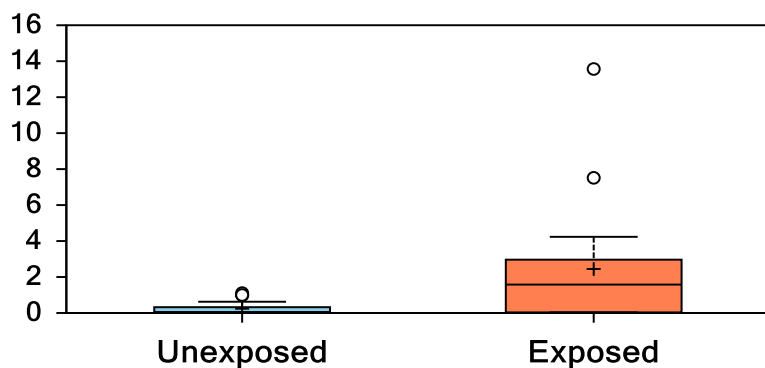

### oleic ethanolamide

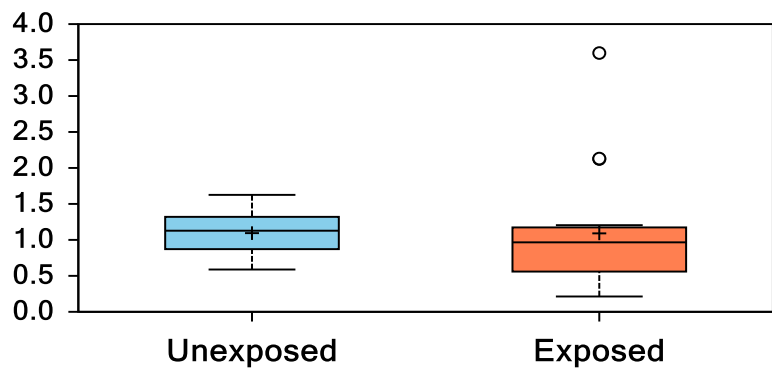

**isovalerate**

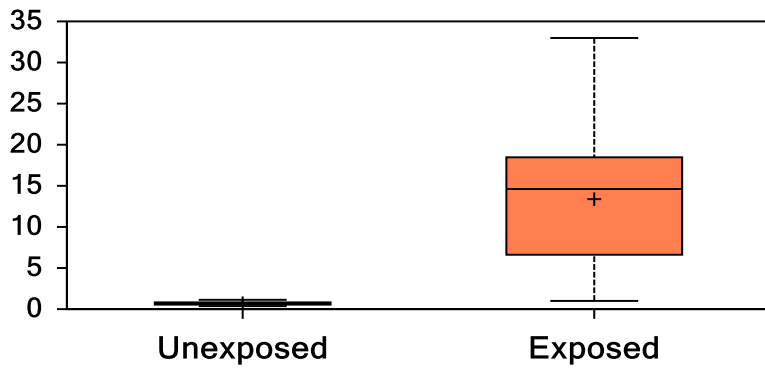

**carnitine**

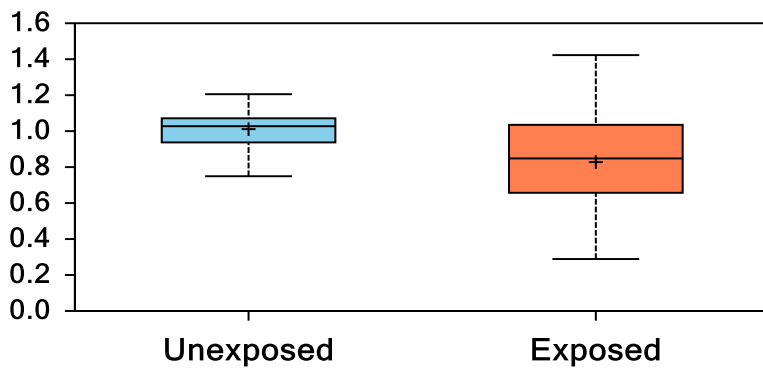

**hexanoylcarnitine**

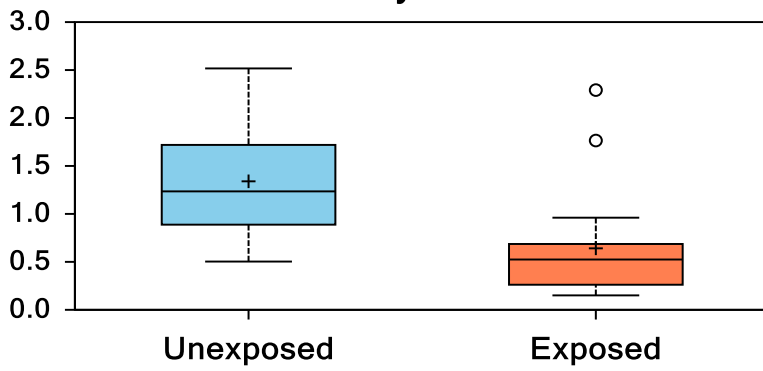

**cis-4-decenoyl carnitine**

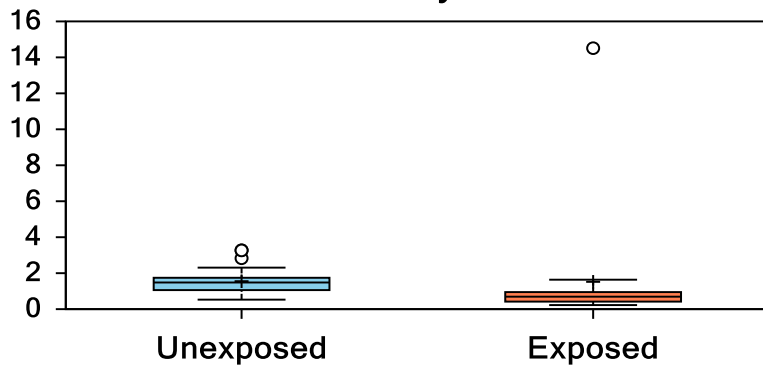

**palmitoylcarnitine**

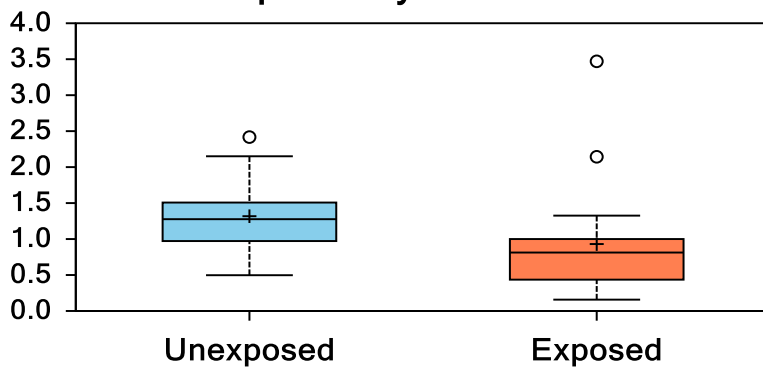

**cholate**

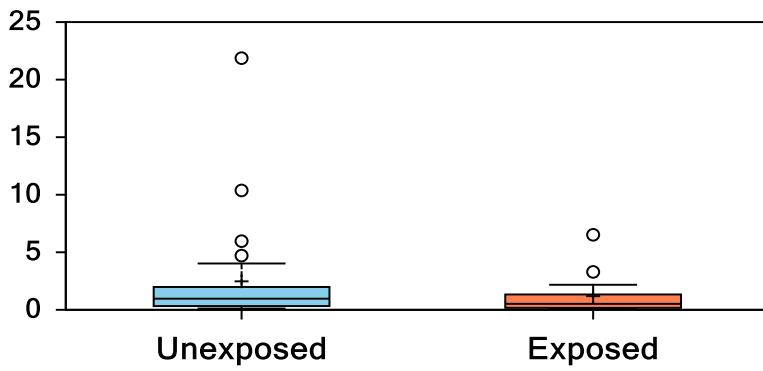

**taurochenodeoxycholate**

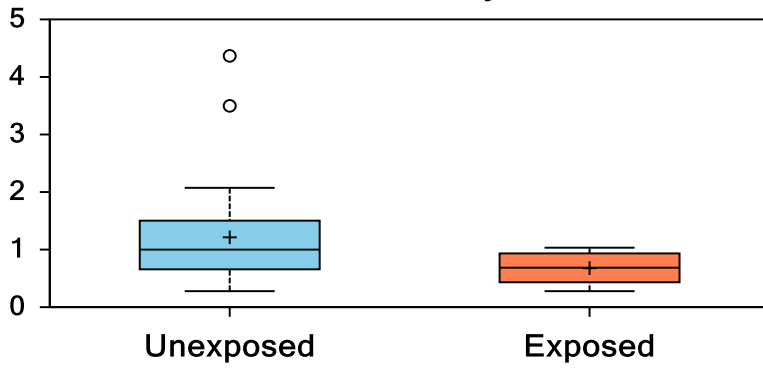

**glycodeoxycholate**

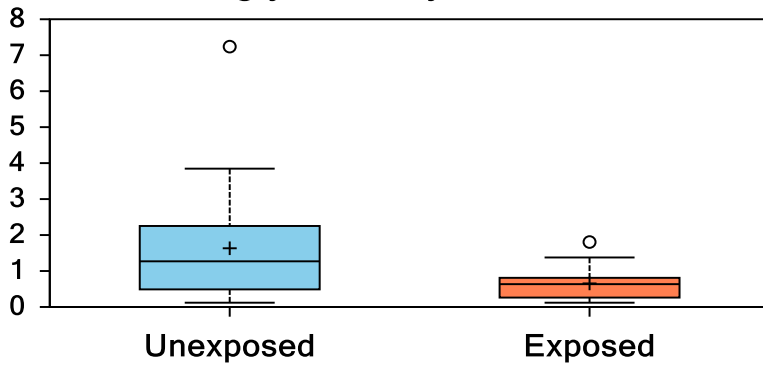

**glycolithocholate sulfate\***

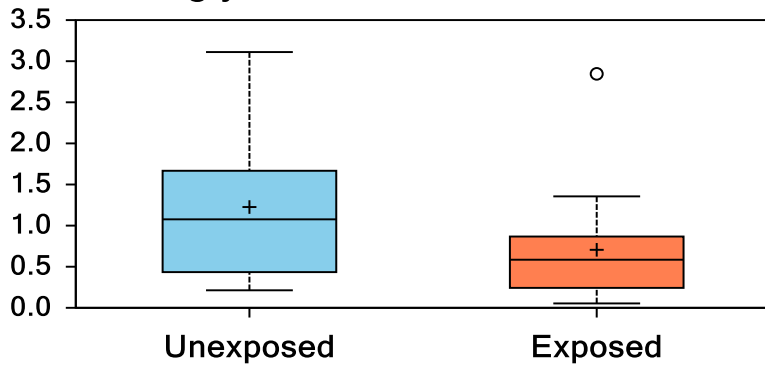

### taurocholenate sulfate\*

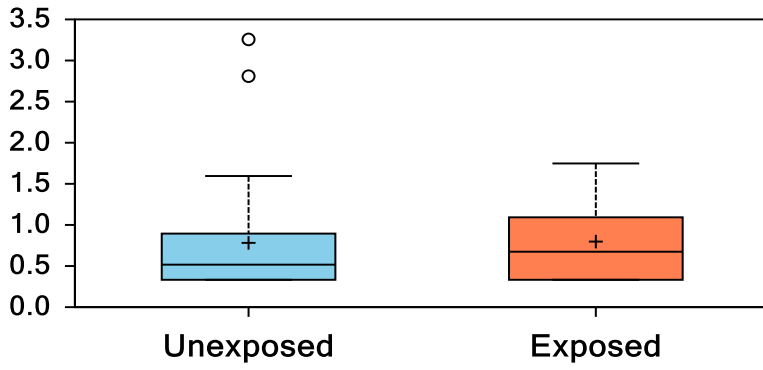

### 1-octadecanol

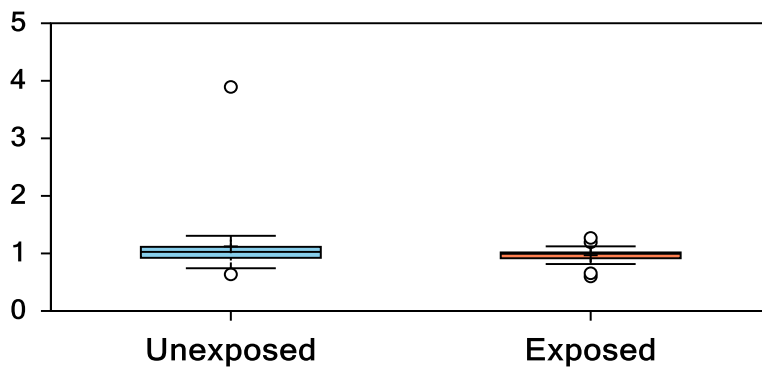

### glycerol 3-phosphate (G3P)

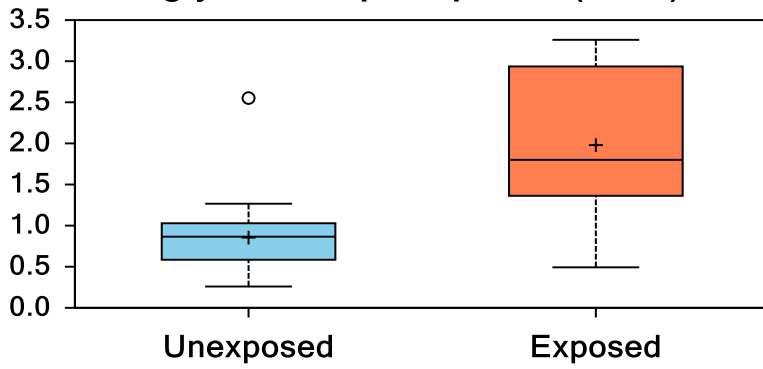

### chiro-inositol

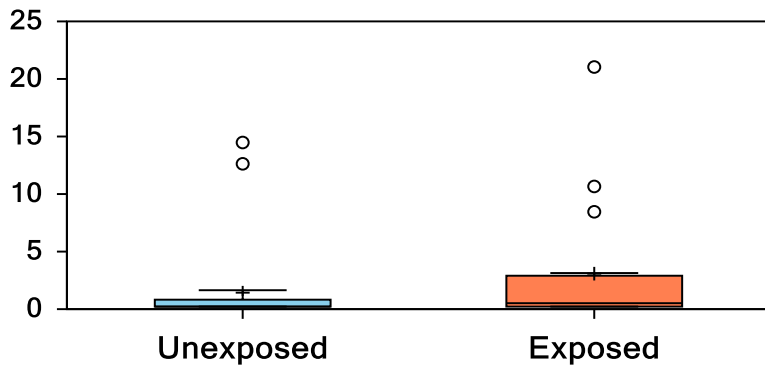

### 3-hydroxybutyrate (BHBA)

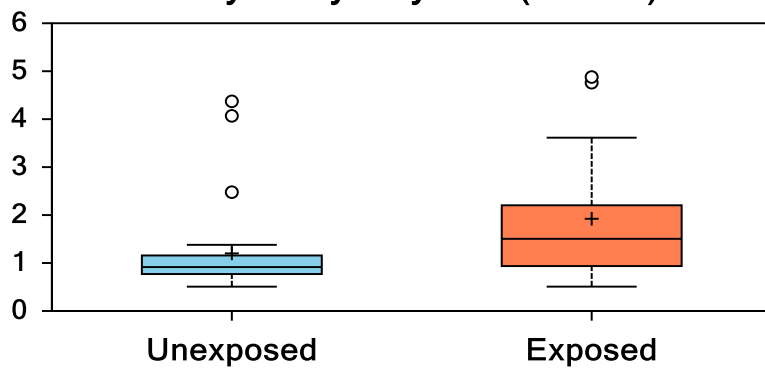

### 2-palmitoylglycerophosphoethanolamine

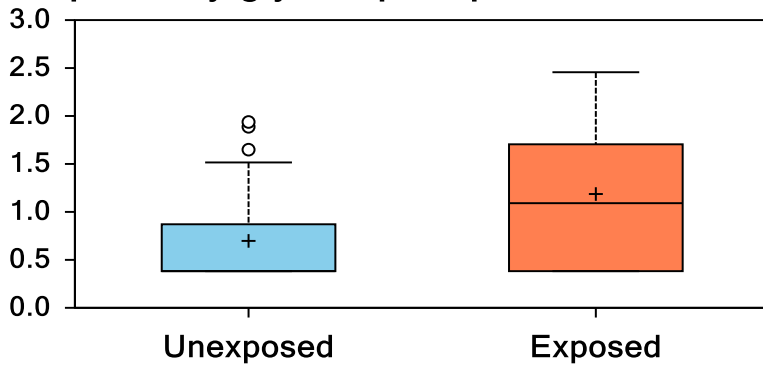

### 2-oleoylglycerophosphoethanolamine\*

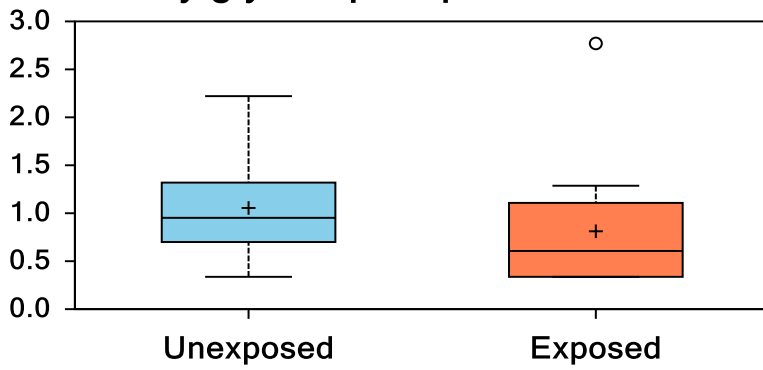

### 1-arachidonoylglycerophosphoethanolamine

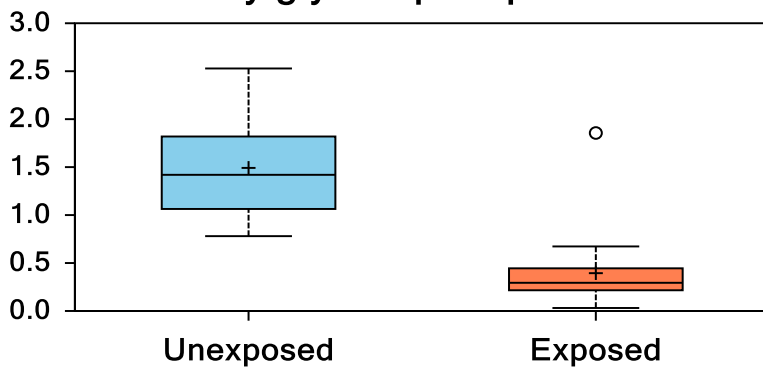

### 1-myristoylglycerophosphocholine

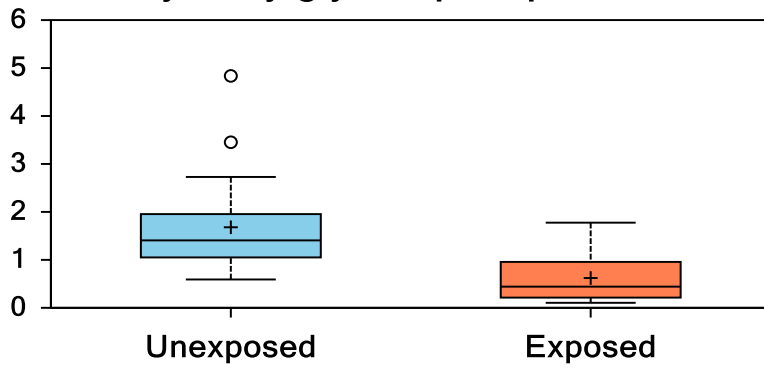

### 1-palmitoylglycerophosphocholine

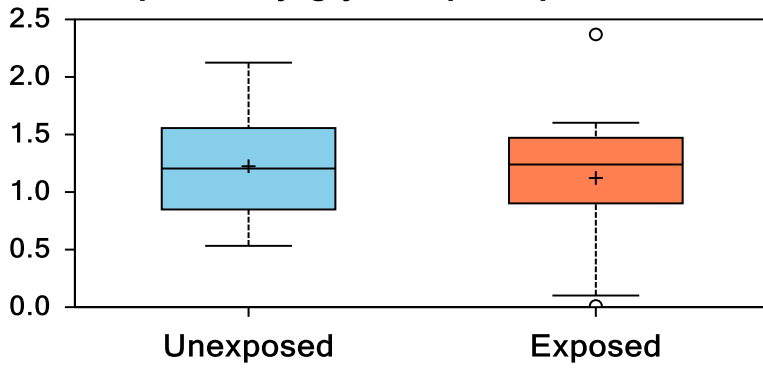

### 2-palmitoleoylglycerophosphocholine\*

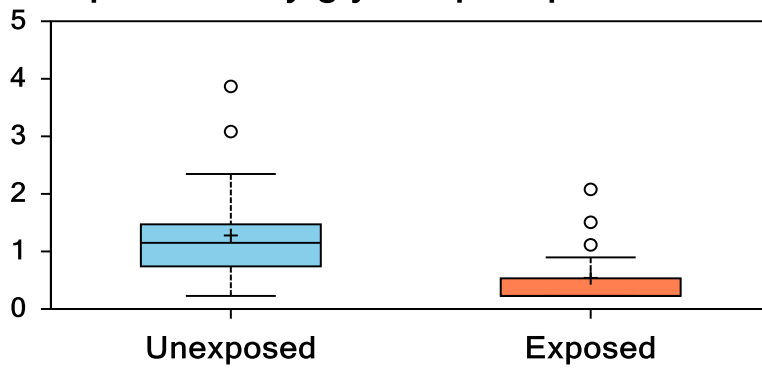

### 2-stearoylglycerophosphocholine\*

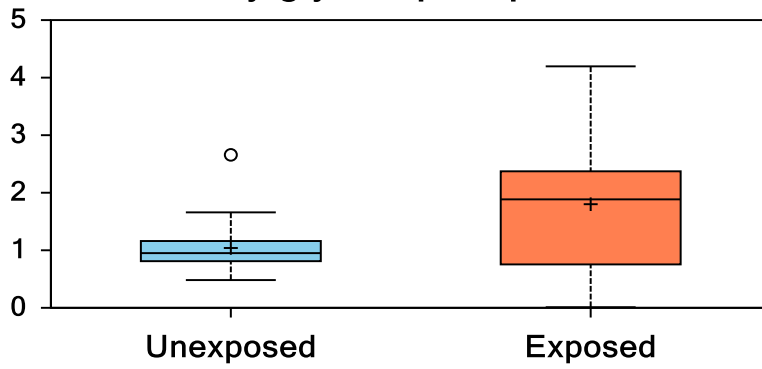



### 1-linoleoylglycerophosphocholine

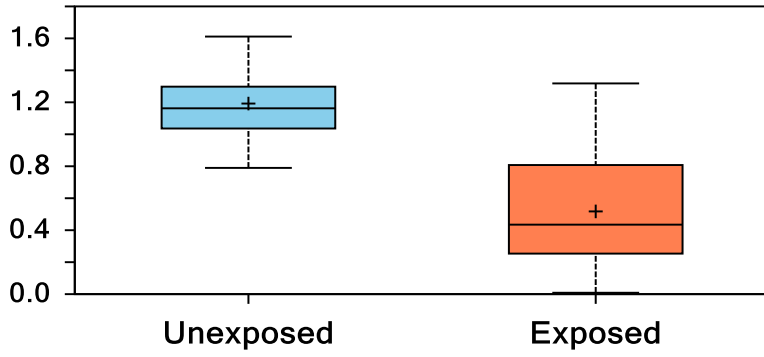

### 1-eicosadienoylglycerophosphocholine\*

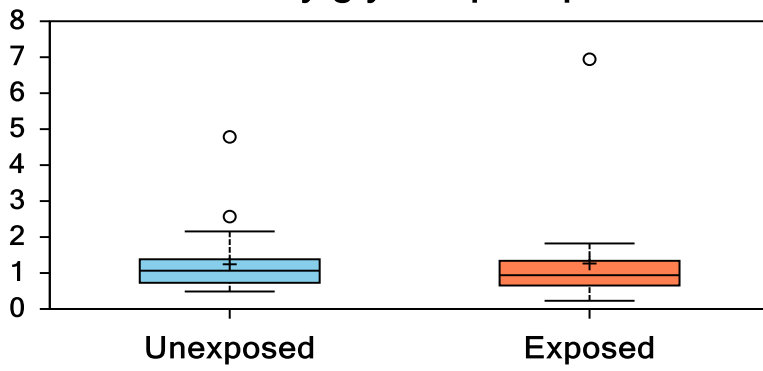

### 1-arachidonoylglycerophosphocholine\*

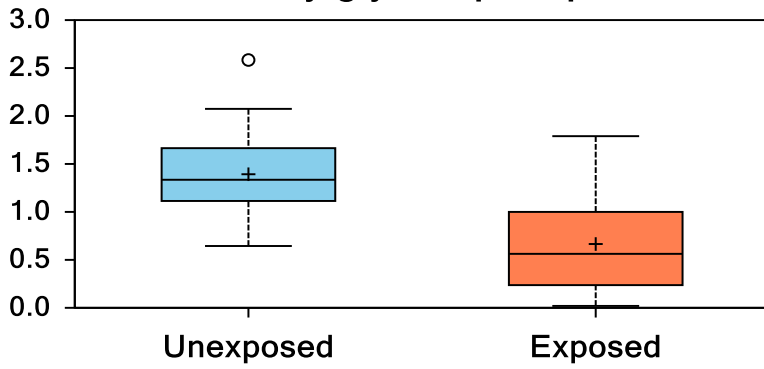

### 1-docosaehaenoylglycerophosphocholin

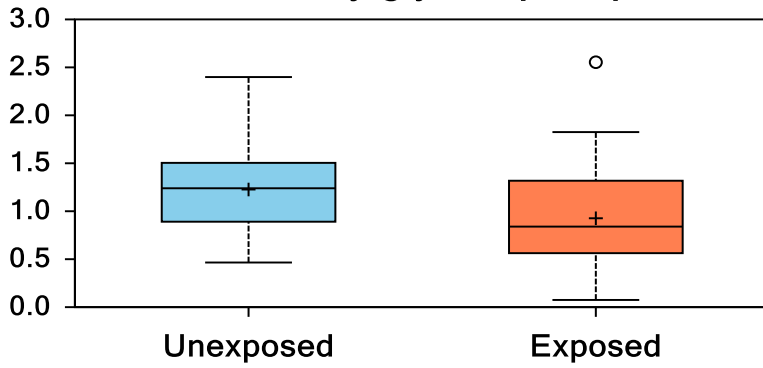

### 1-arachidonoylglycerophosphoinositol\*

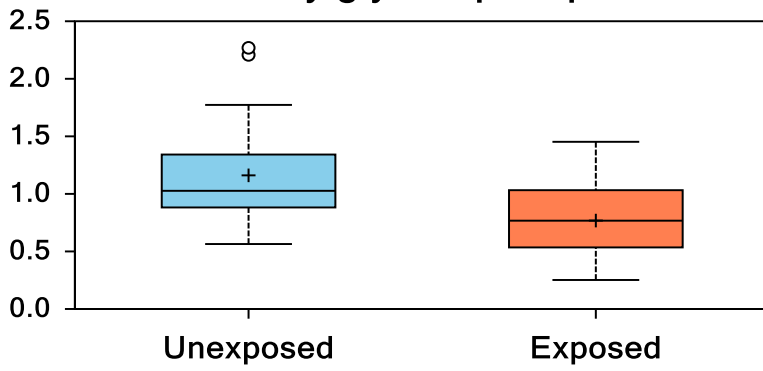

### 1-oleoylglycerol (1-monoolein)

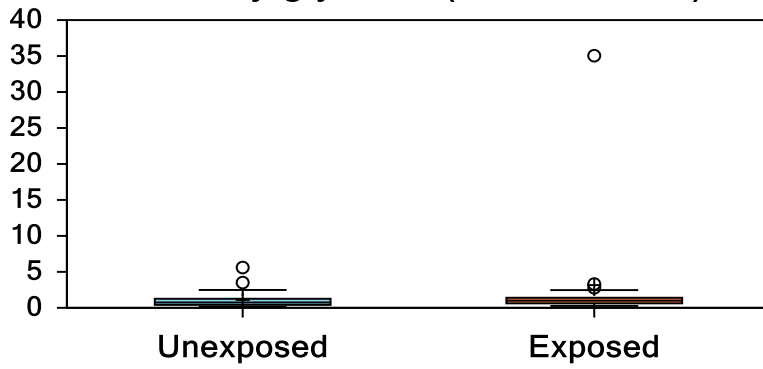

### sphinganine

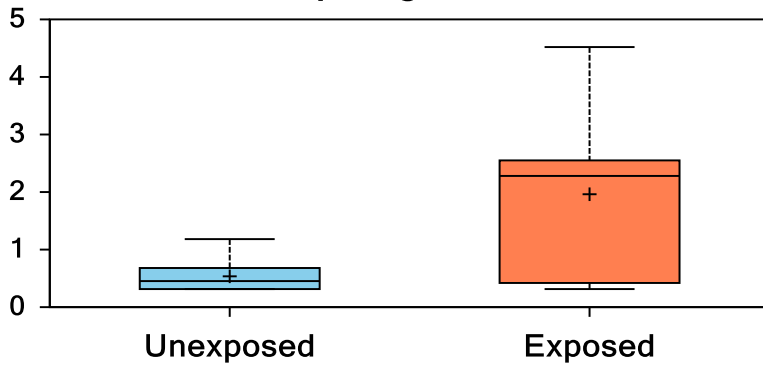

### erythro-sphingosine-1-phosphate

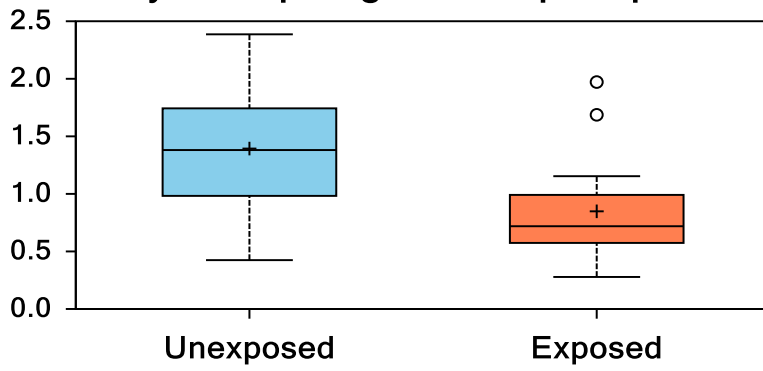

### 3-hydroxy-3-methylglutarate

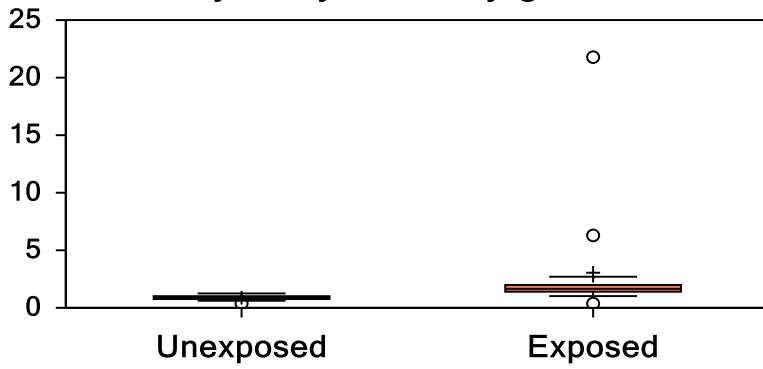

### cholesterol

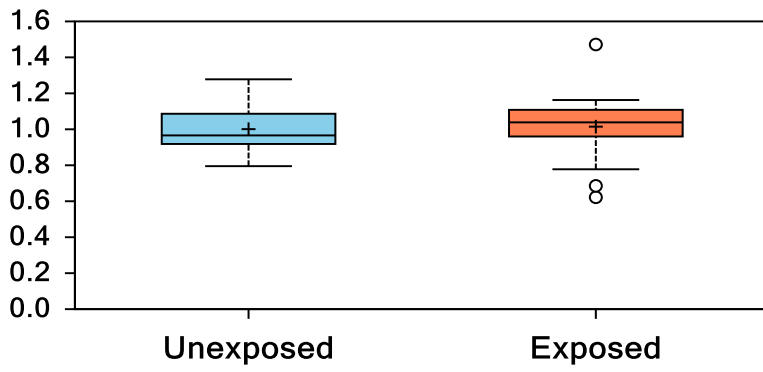

### 7-ketocholesterol

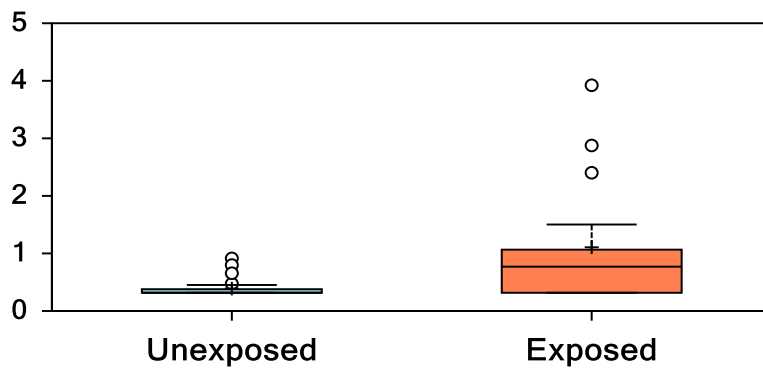

### androsterone sulfate

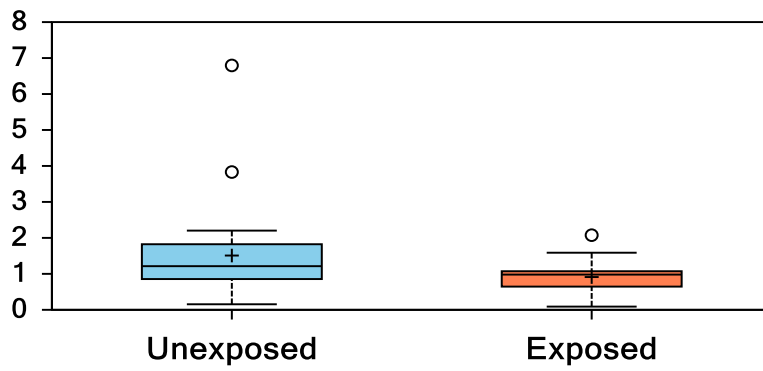

### cortisone

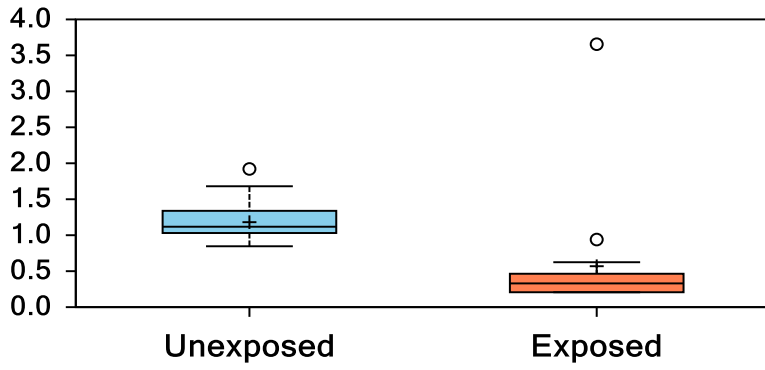

### 4-androsten-3beta,17beta-diol disulfate 1\*

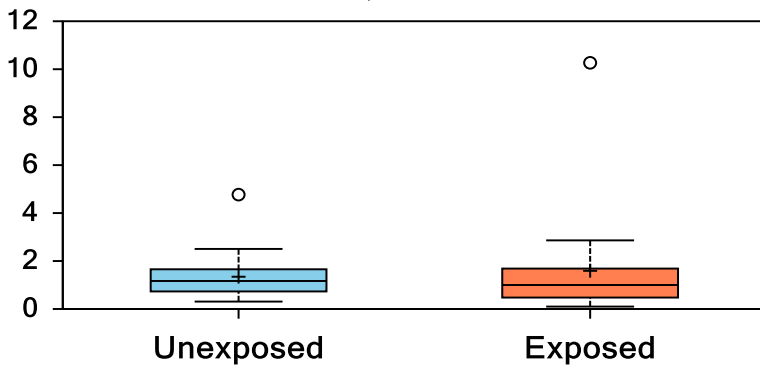

### 5alpha-androstan-3alpha,17beta-diol monosulf

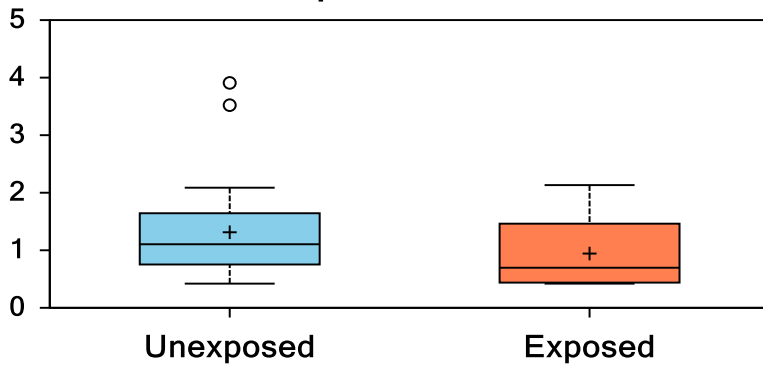

### 5alpha-pregnan-3beta,20alpha-diol disulfate

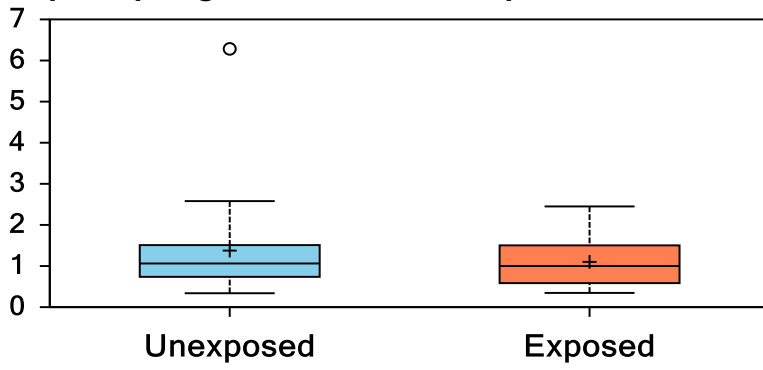

### 21-hydroxypregnenolone disulfate

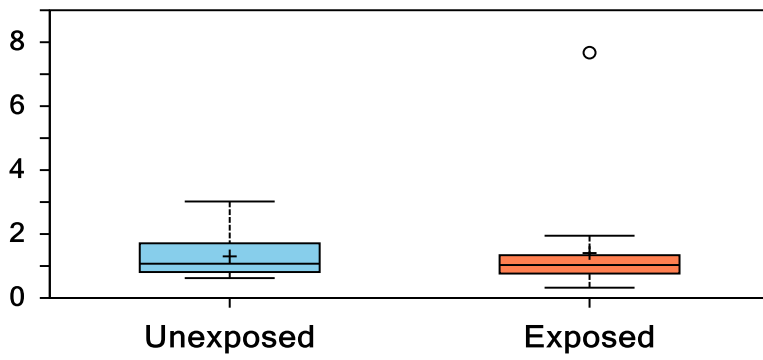

### pregnenediol-3-glucuronide

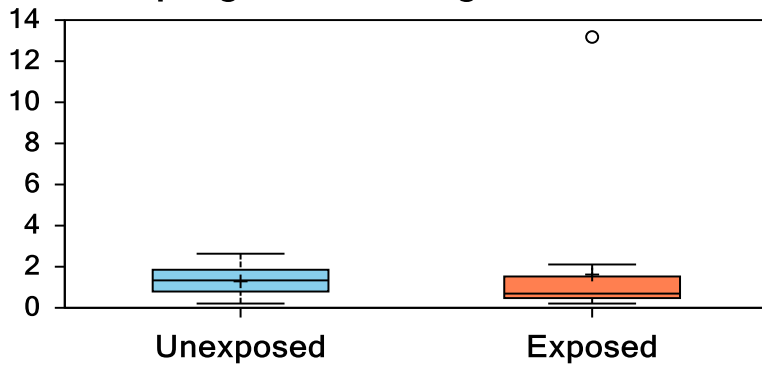

### hypoxanthine

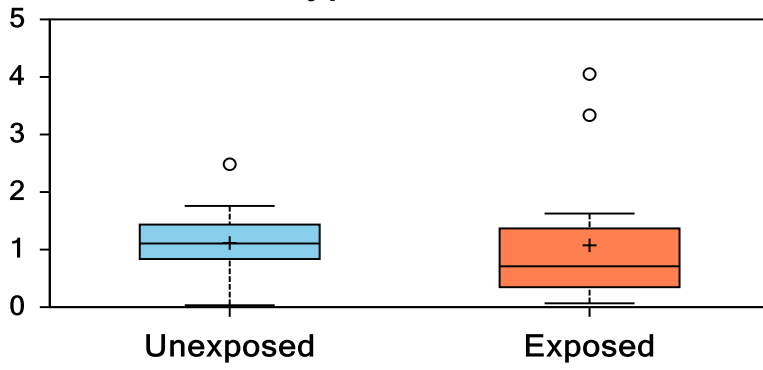

### N1-methyladenosine

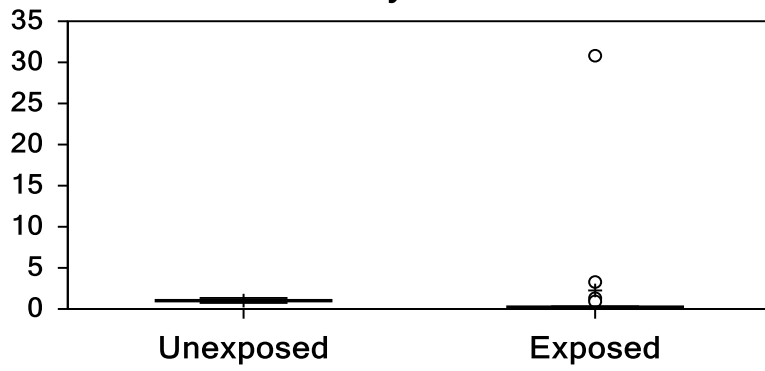

### 7-methylguanine

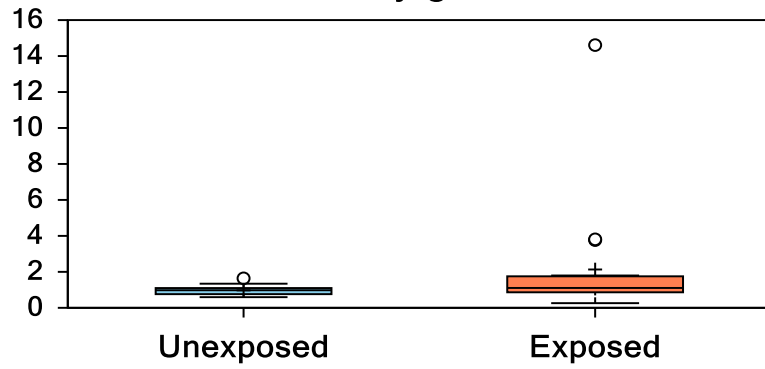

### 2'-O-methylguanosine

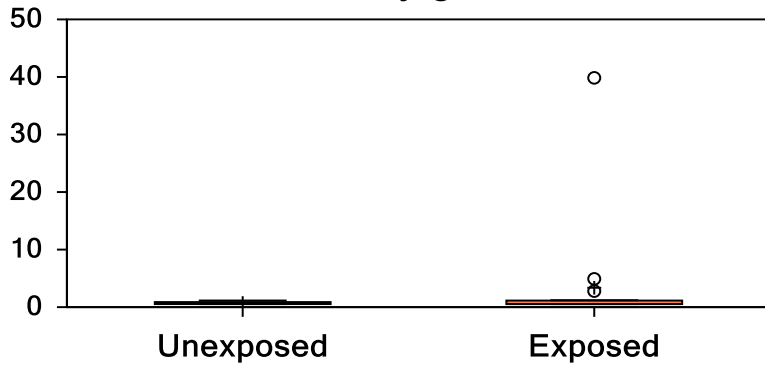

### urate

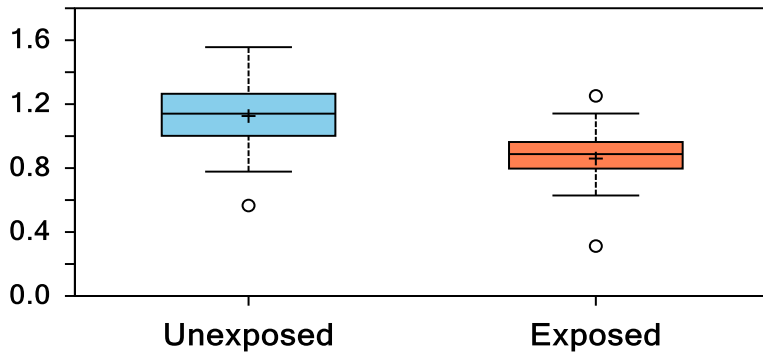

### orotate

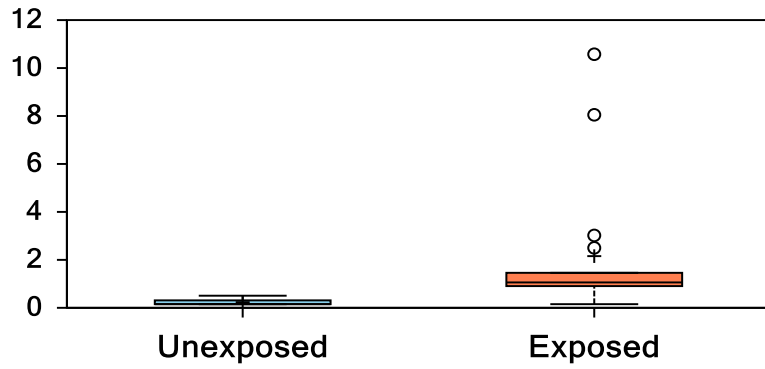



### 3-aminoisobutyrate

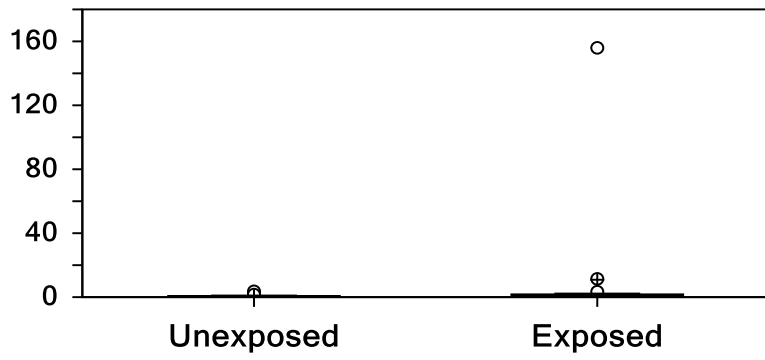

### pseudouridine

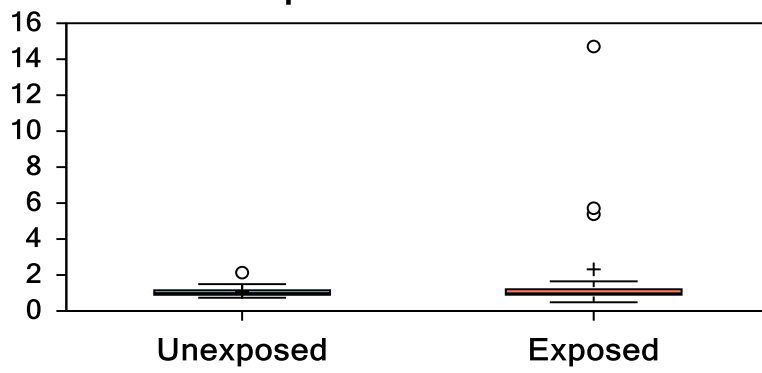

### ascorbate (Vitamin C)

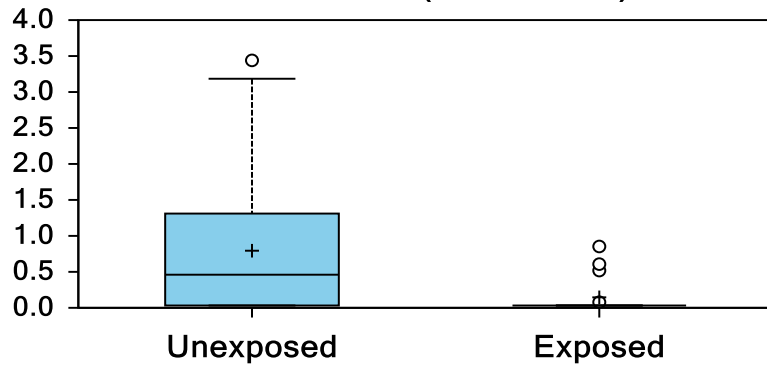

arabonate

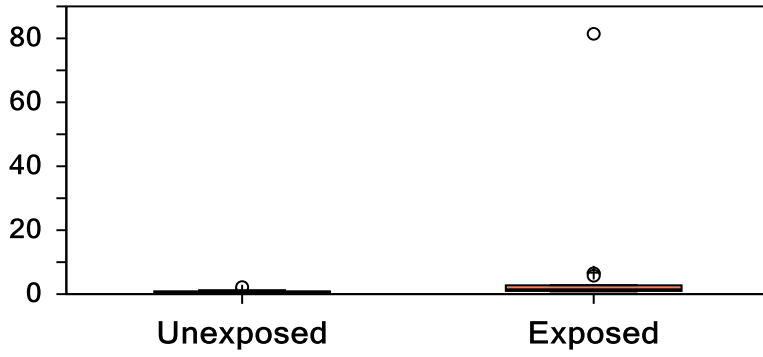

bilirubin (Z,Z)

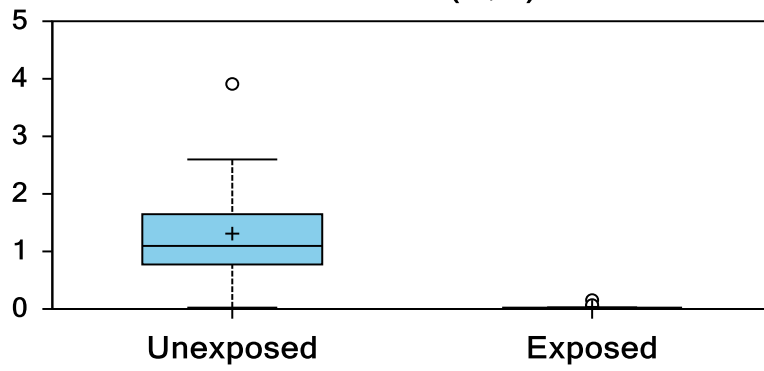

biliverdin

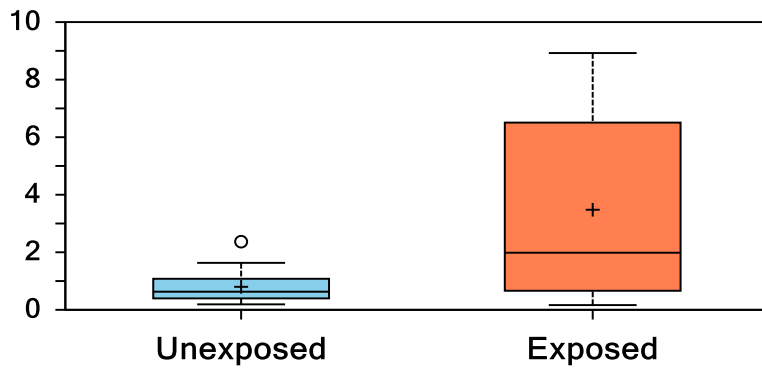

quinolinate

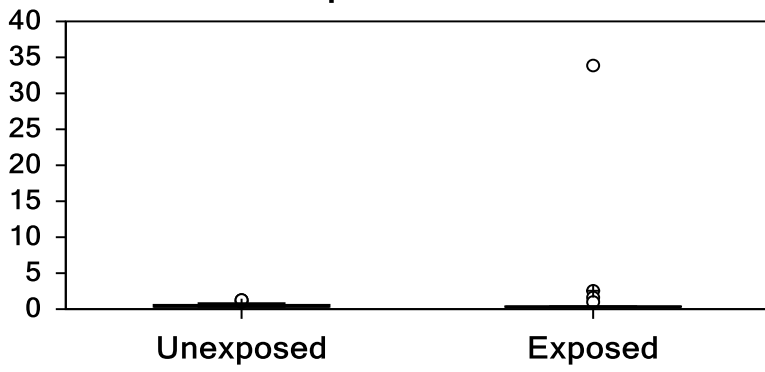

pantothenate

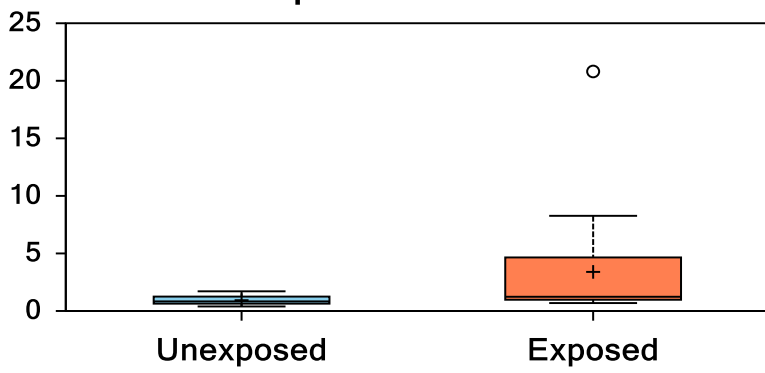

beta-tocopherol

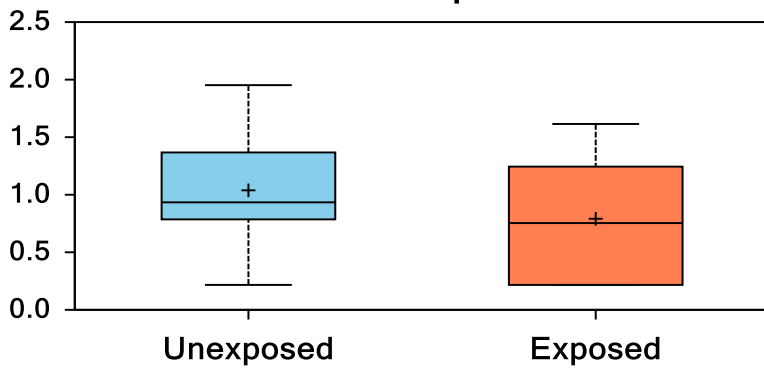

### pyridoxate

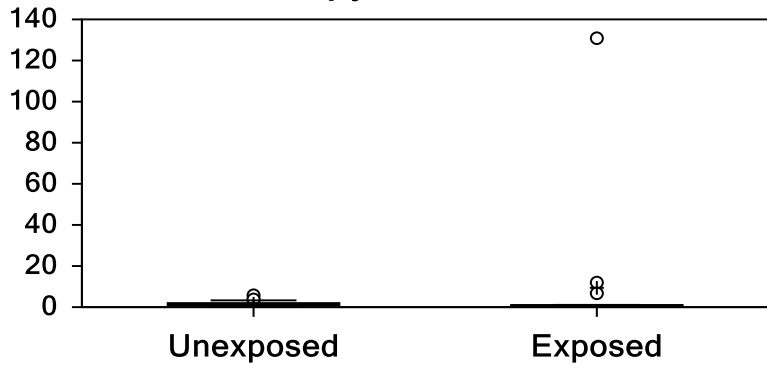

### 2-methylhippurate

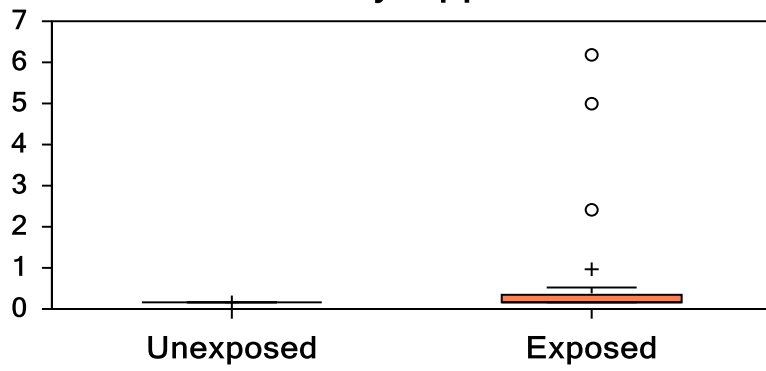

### 4-hydroxyhippurate

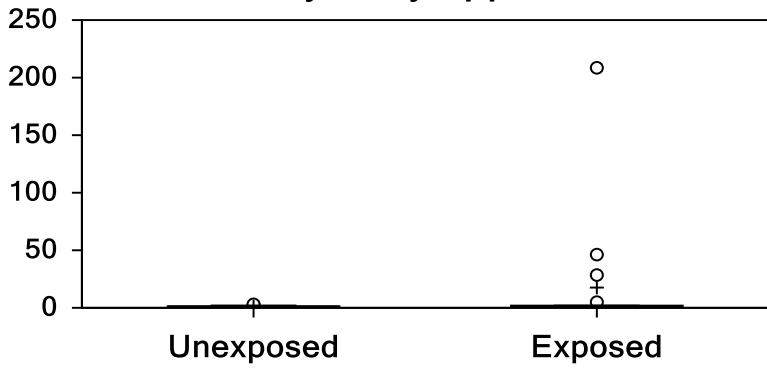

### benzoate

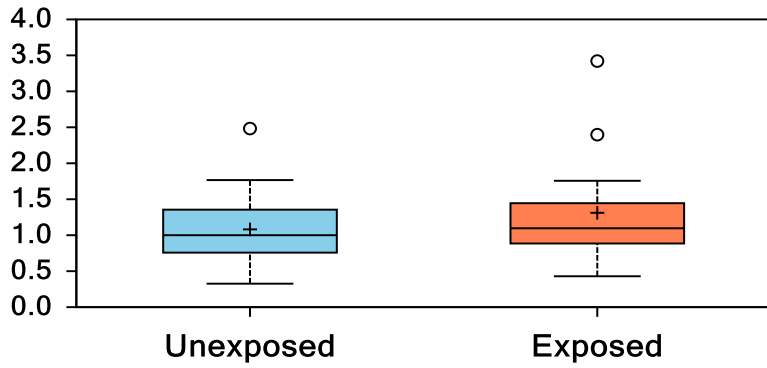

### 3-ethylphenylsulfate\*

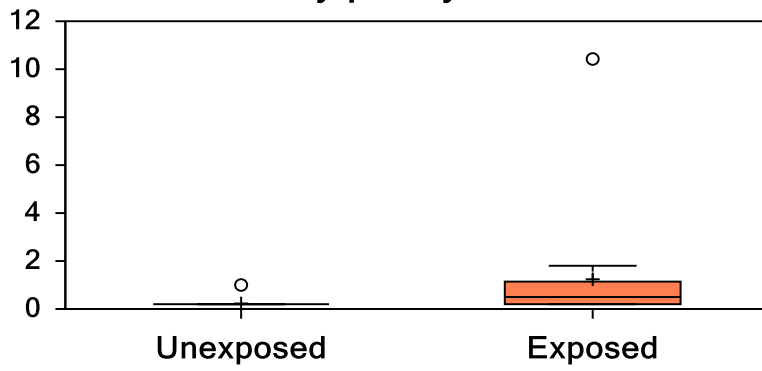

### glycolate (hydroxyacetate)

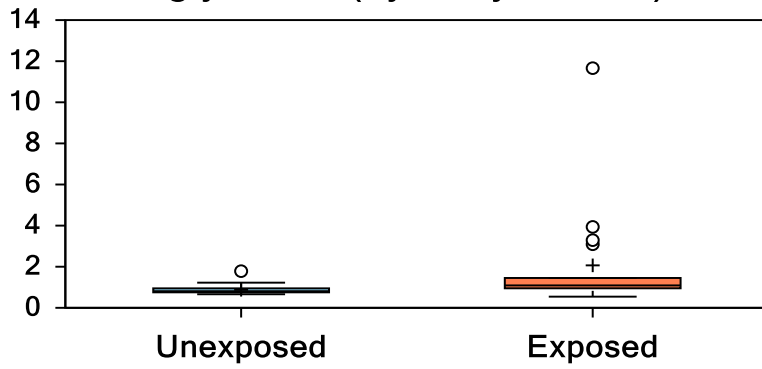

glycerol 2-phosphate

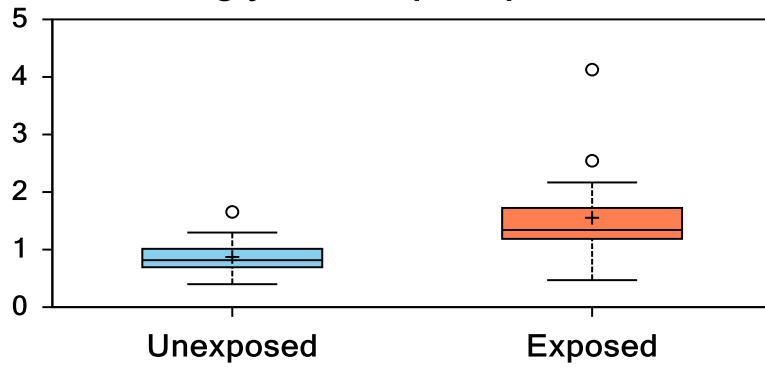

ectoine

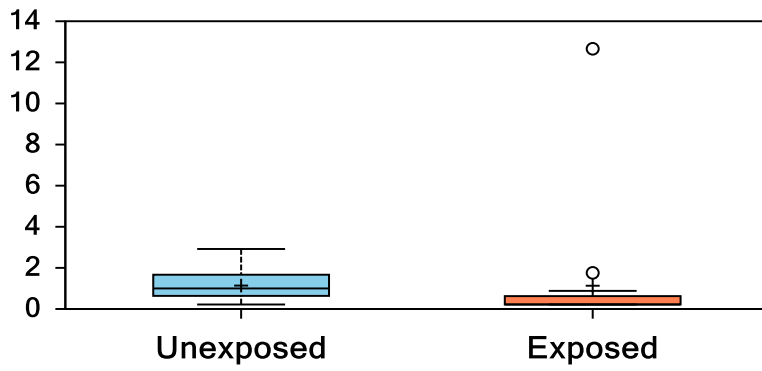

salicylate

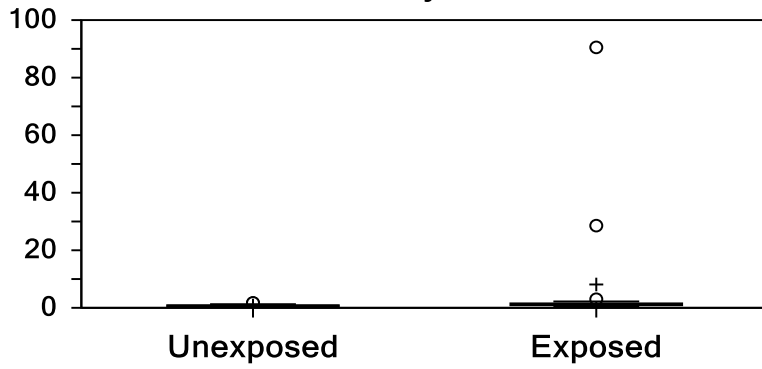

### 4-acetamidophenol

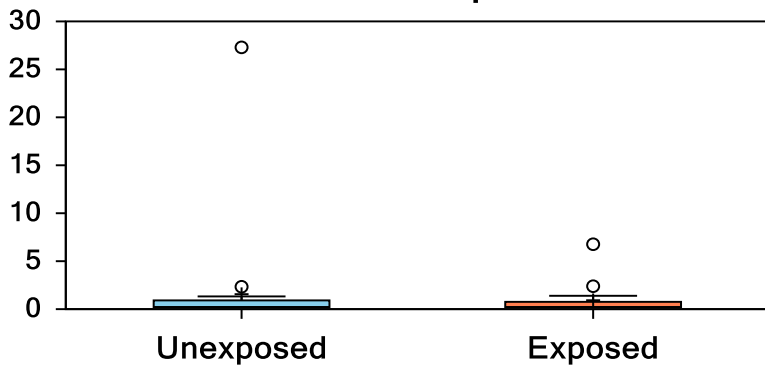

### 2-methoxyacetaminophen sulfate\*

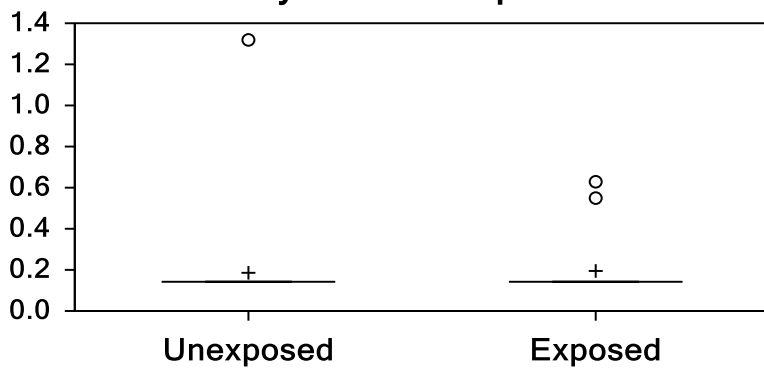

### ibuprofen

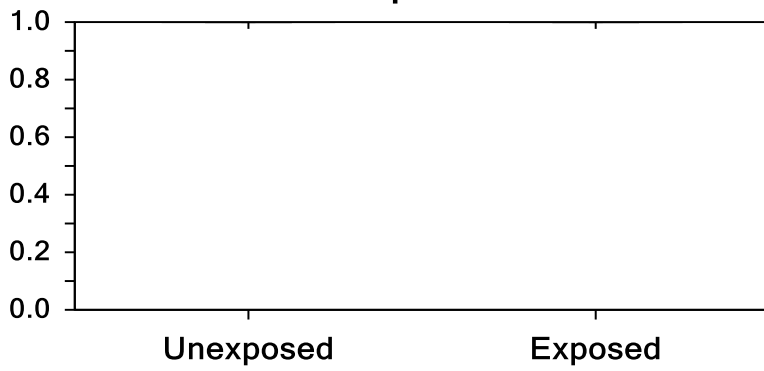

### lidocaine

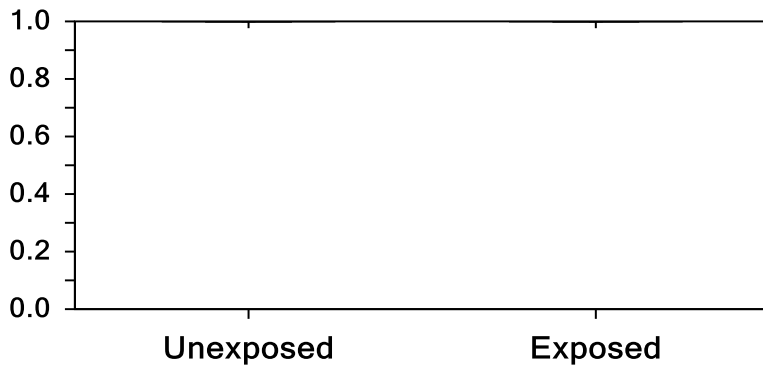

### metoprolol

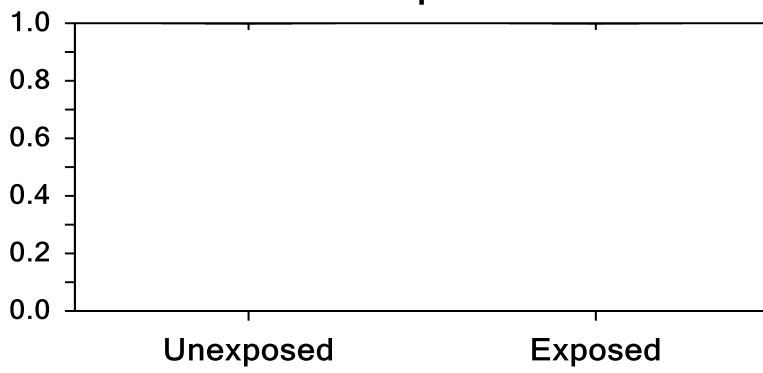

### nifedipine

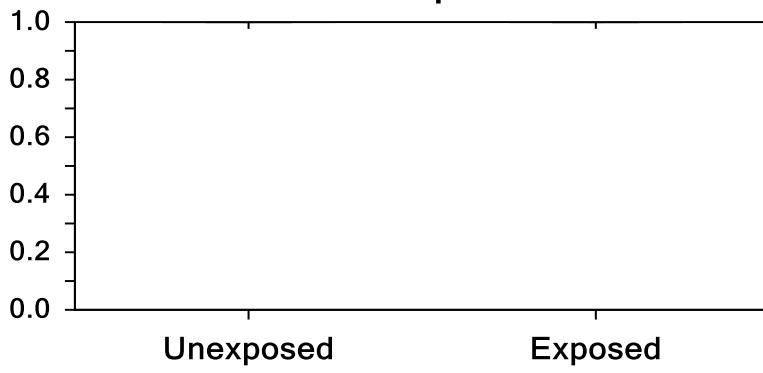



### ranitidine

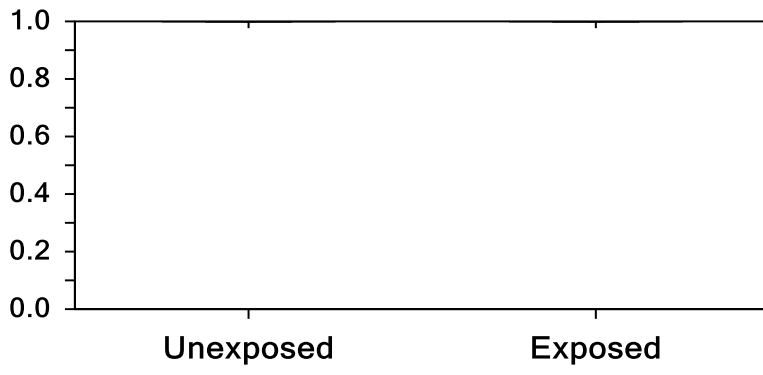

### omeprazole

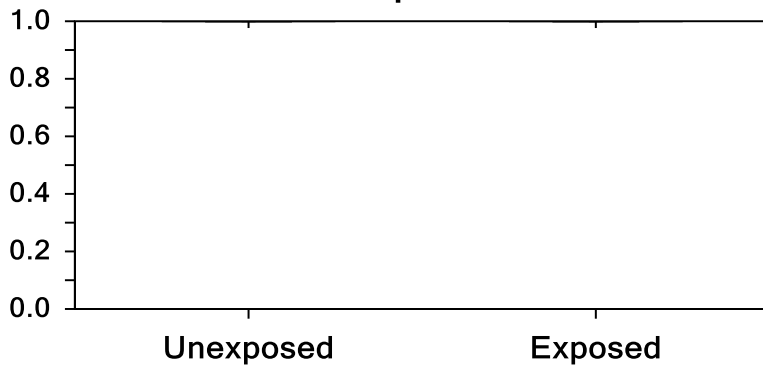

### EDTA

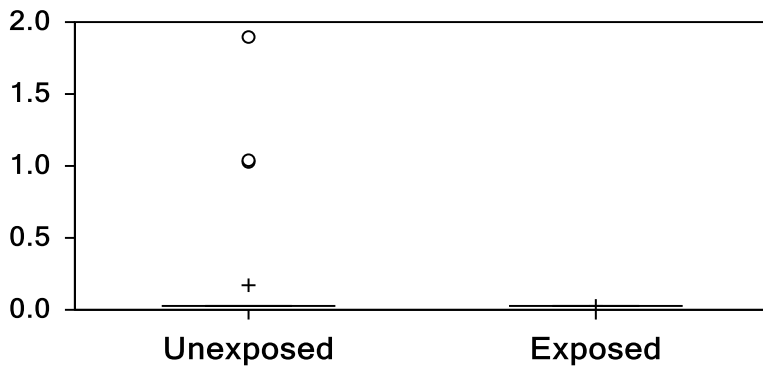

### quinate

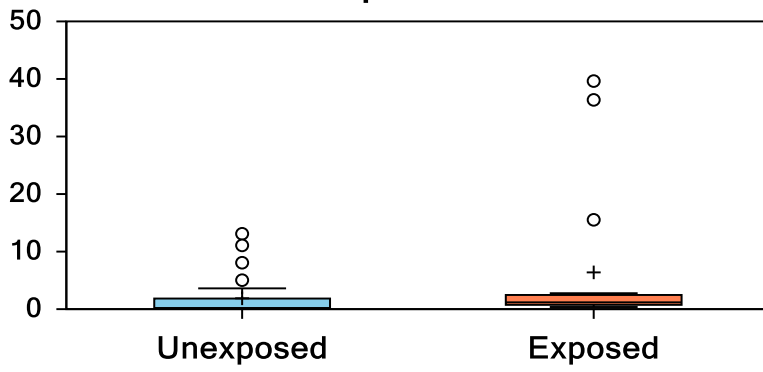

### dihydroferulic acid

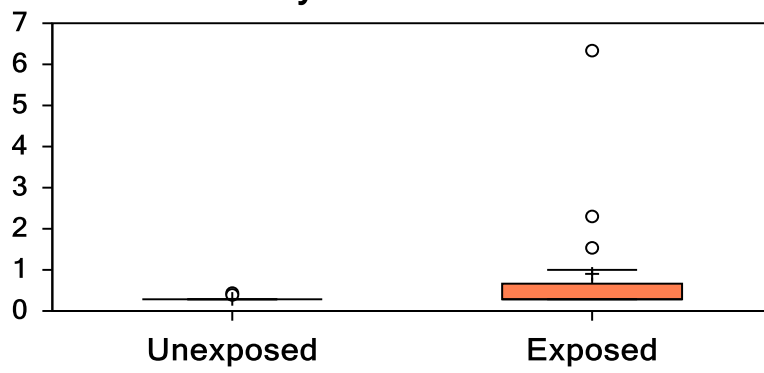

### N-(2-furoyl)glycine

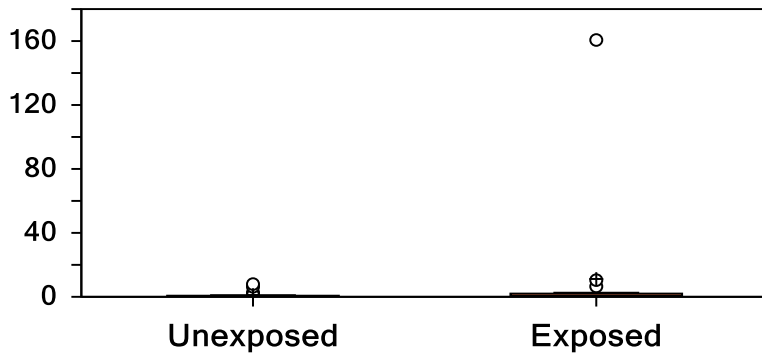

homostachydrine\*

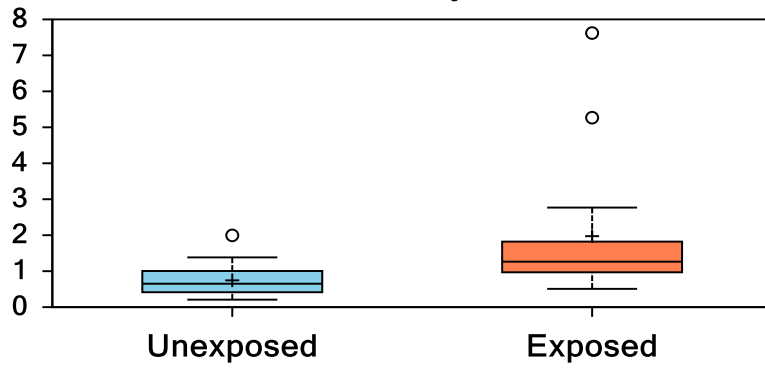

cinnamoylglycine

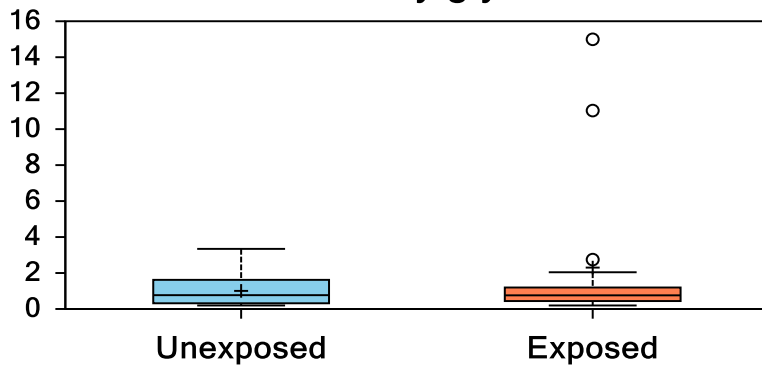

caffeine

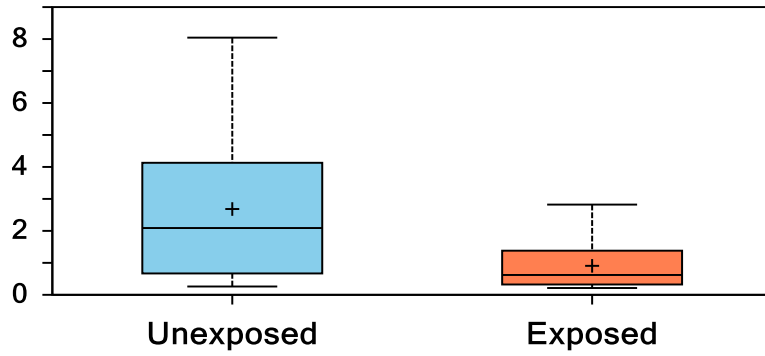

### 1,7-dimethylurate

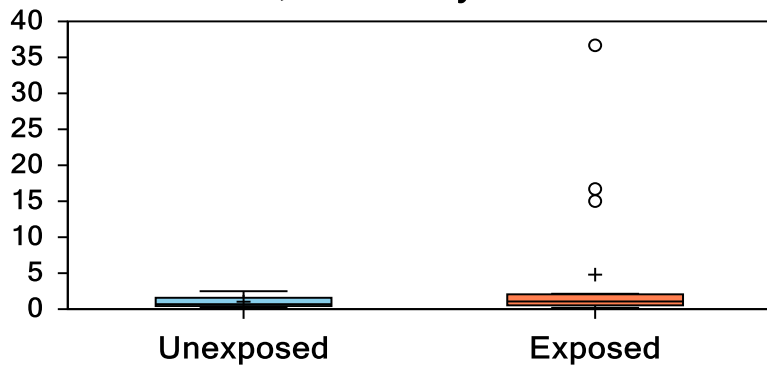

### 5-acetylamino-6-amino-3-methyluracil

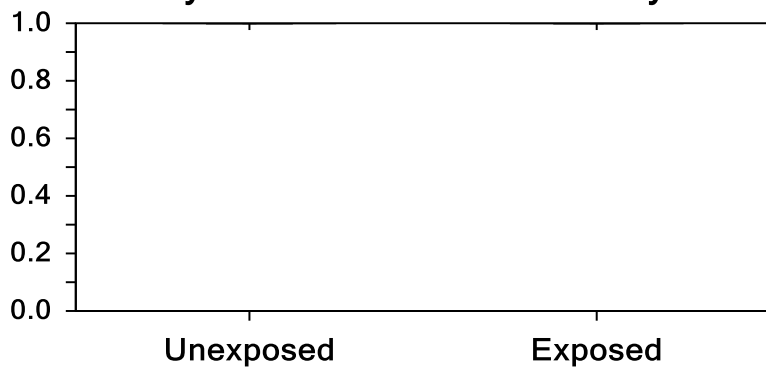

### cotinine N-oxide

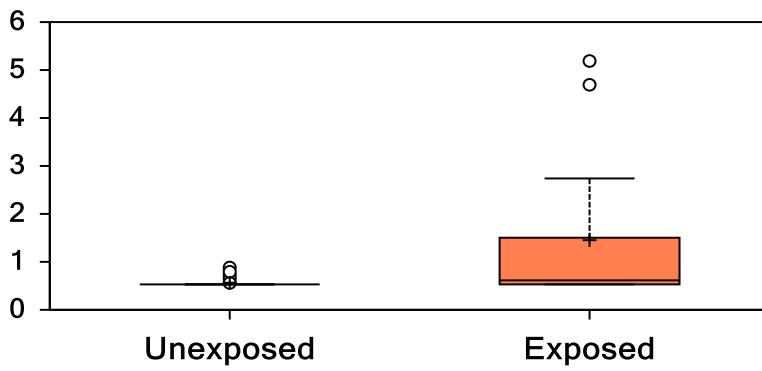

### ethyl glucuronide

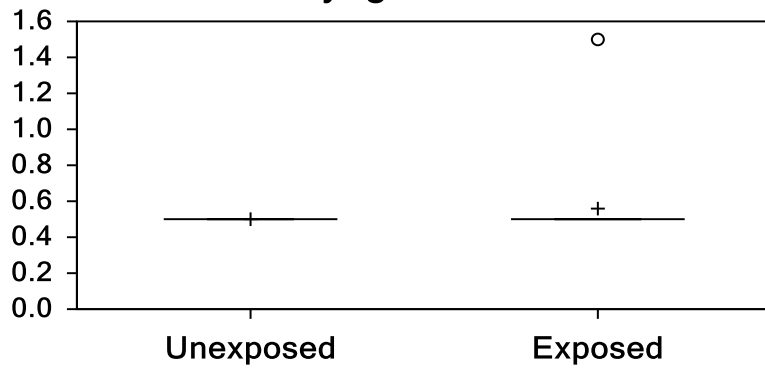

### X - 16121

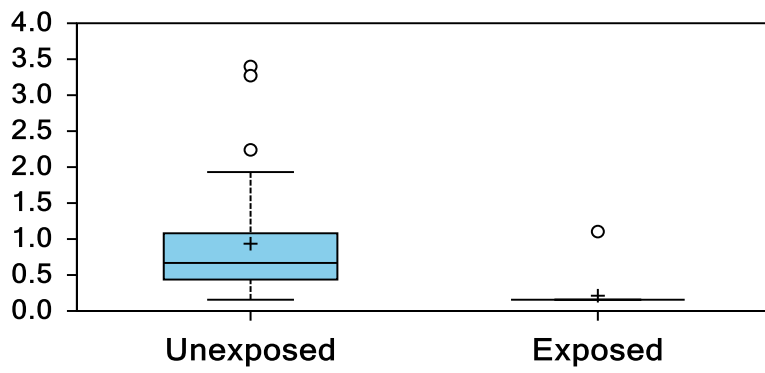

### X - 16087

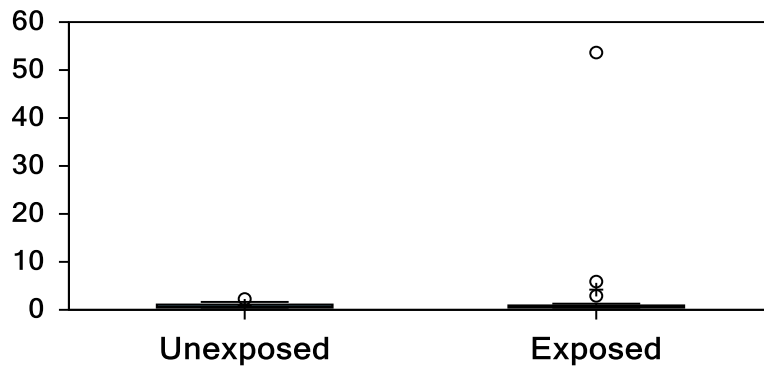

X - 16125

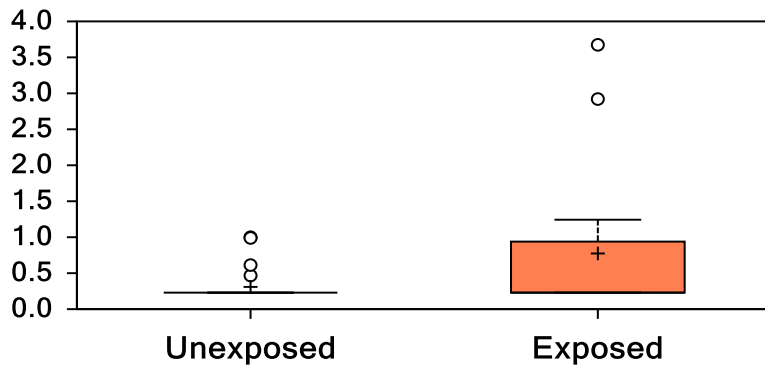

X - 16134

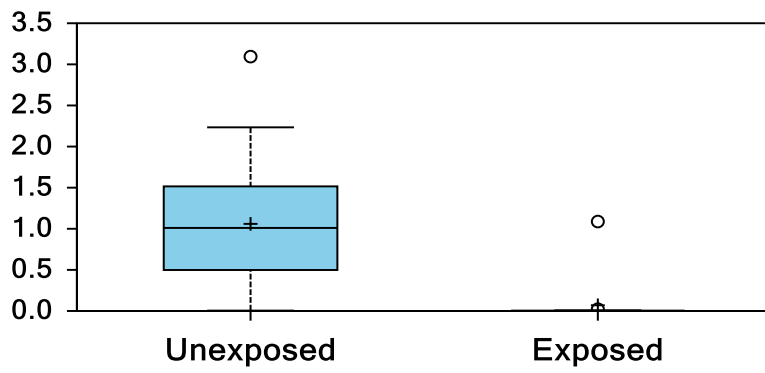

X - 16129

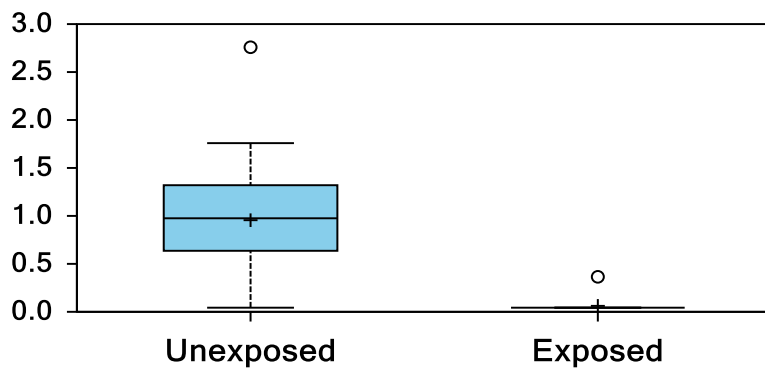

X - 15731

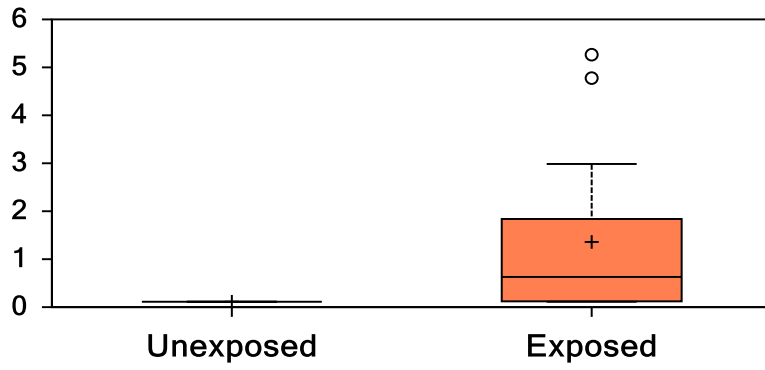

X - 15708

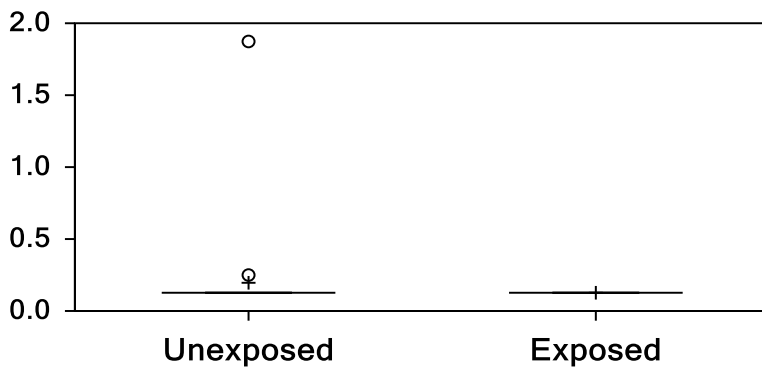

X - 15720

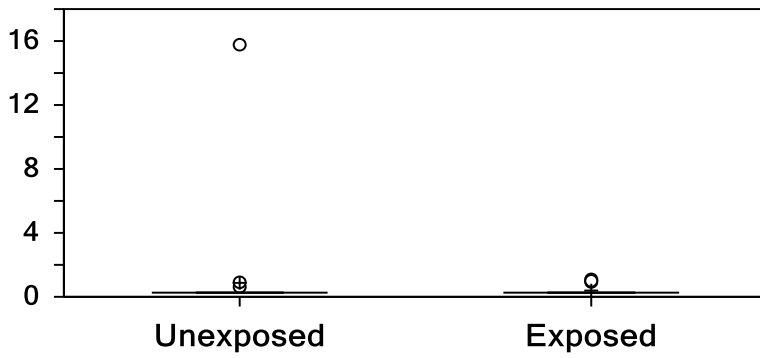

X - 16083

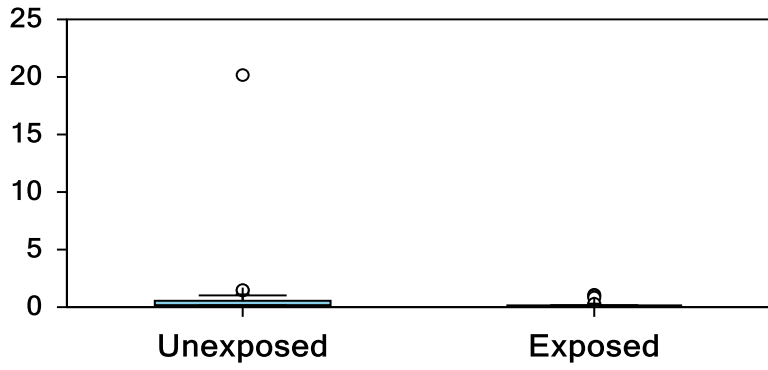

X - 15808

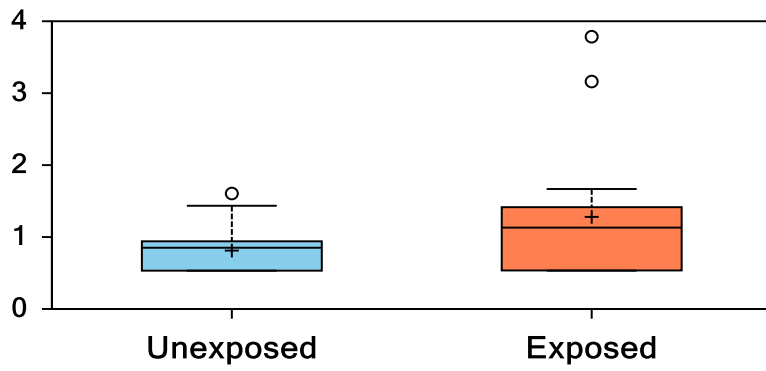

X - 16461

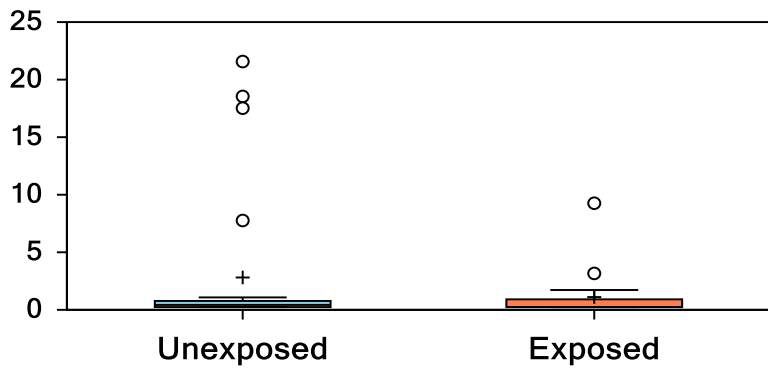



X - 16468

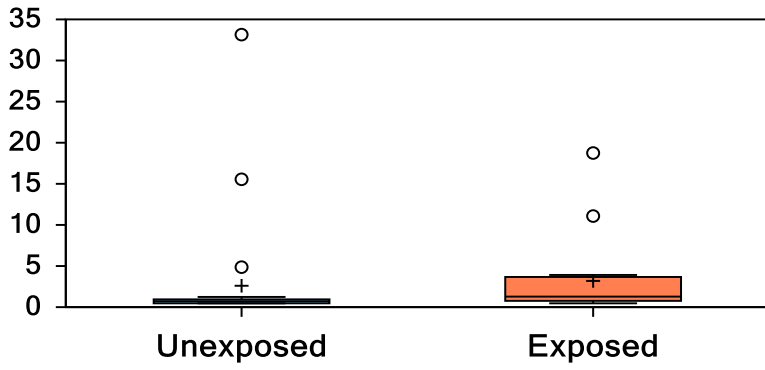

X - 16448

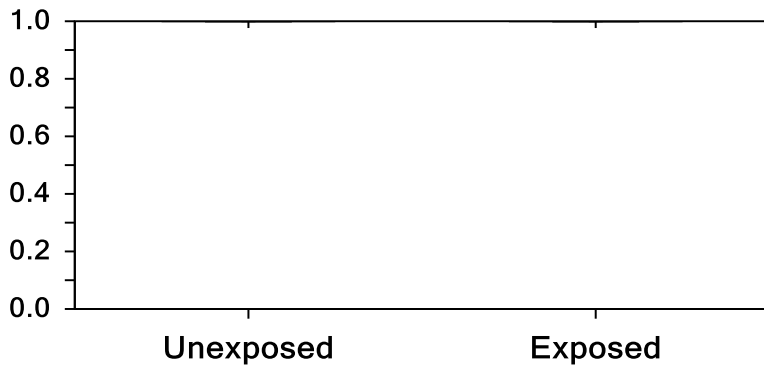

X - 16578

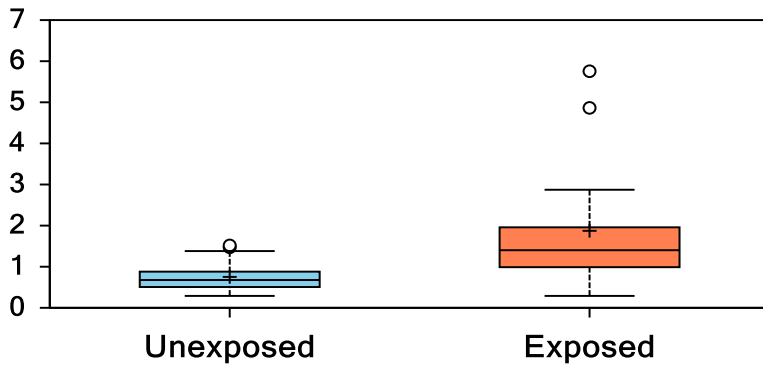

X - 16567

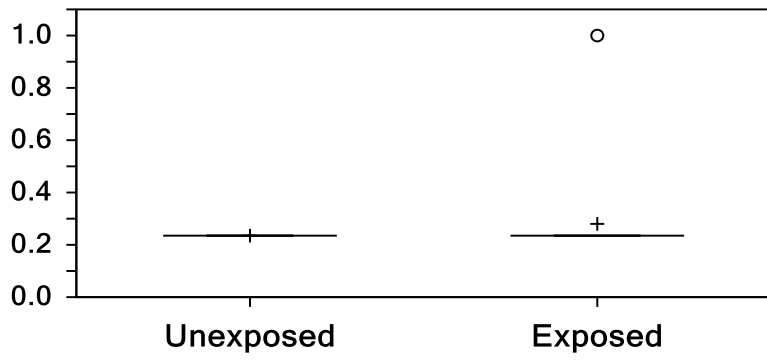

X - 16570

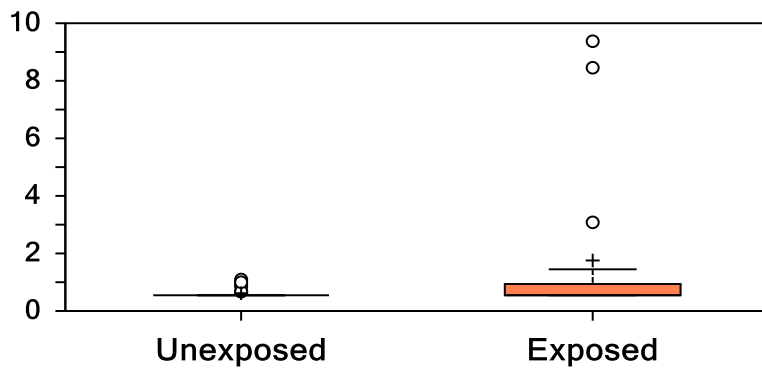

X - 16288

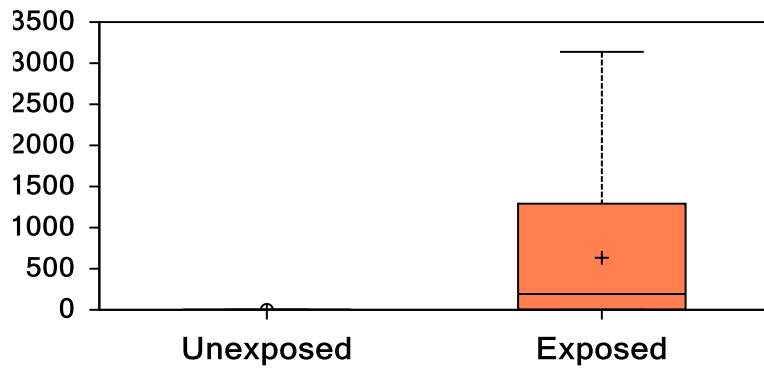

X - 16135

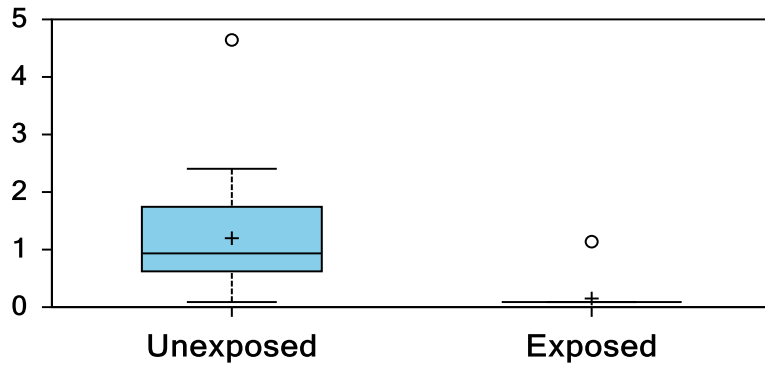

X - 16391



X - 16394

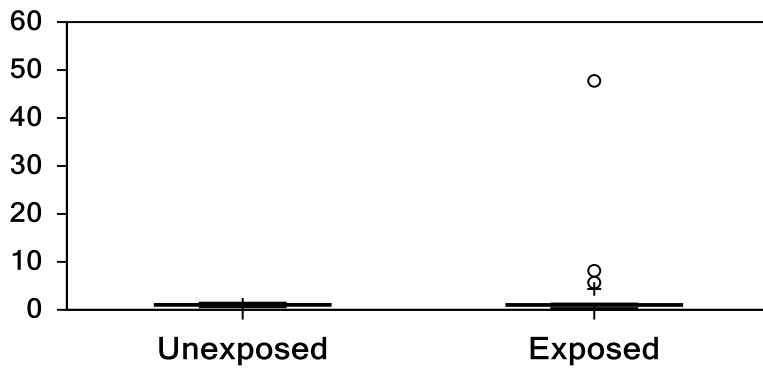

X - 16323

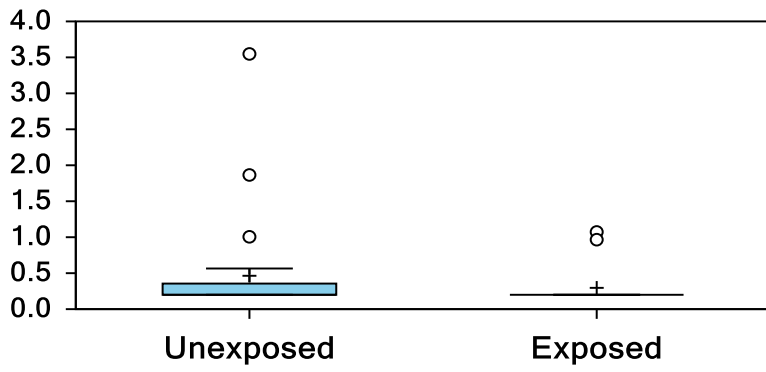

X - 14458

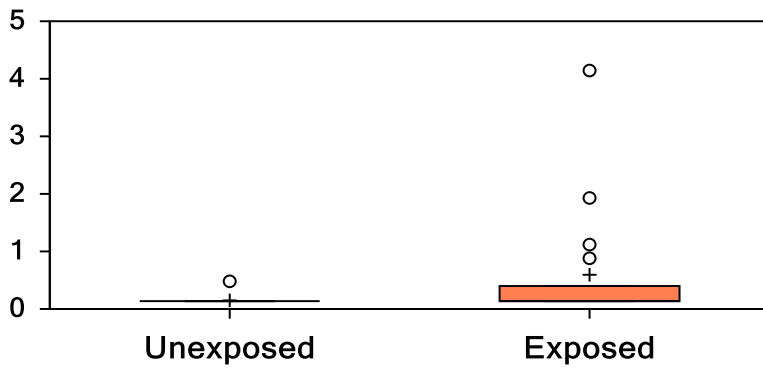

X - 14465

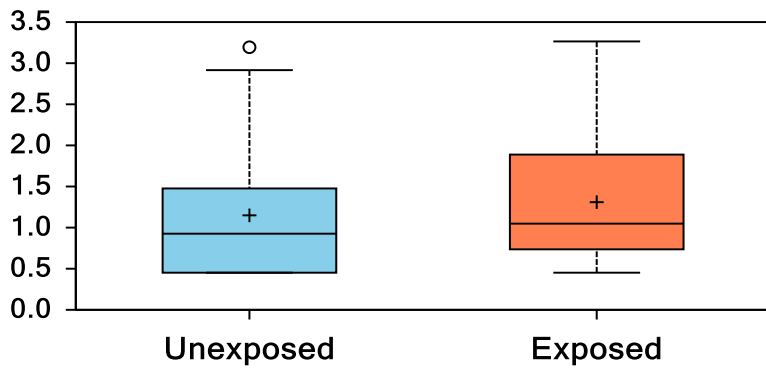

X - 14427

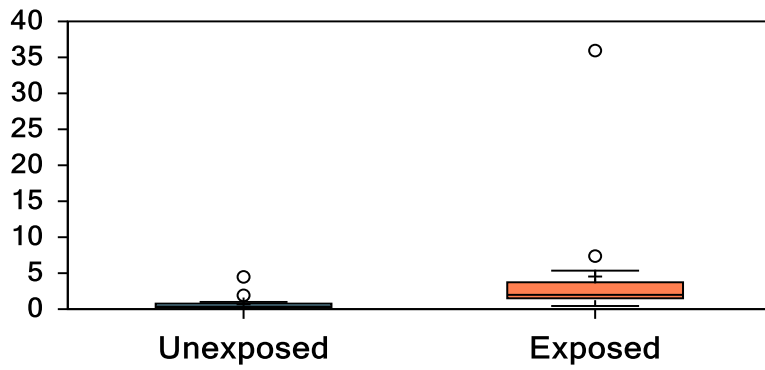

X - 14603

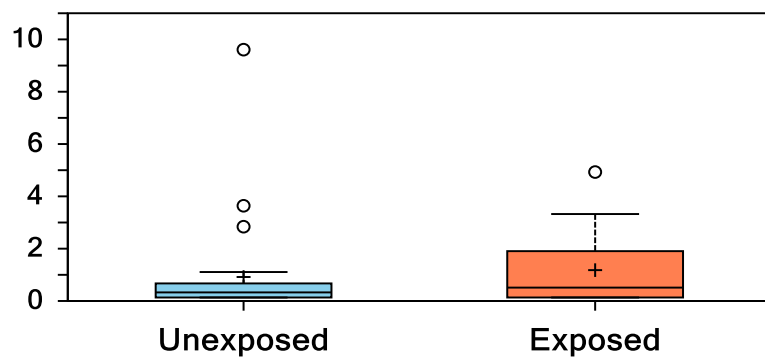

X - 14512

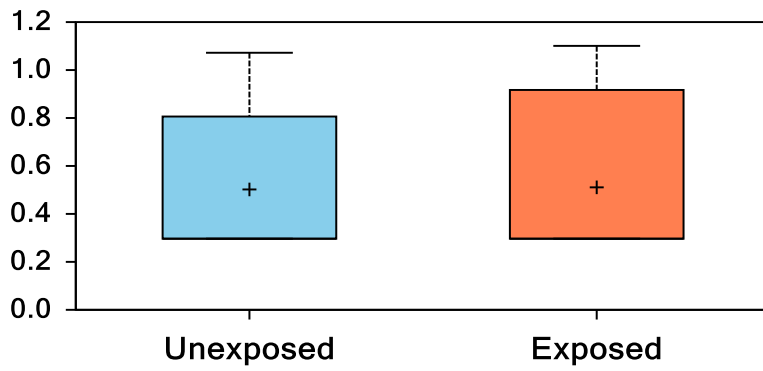

X - 14567

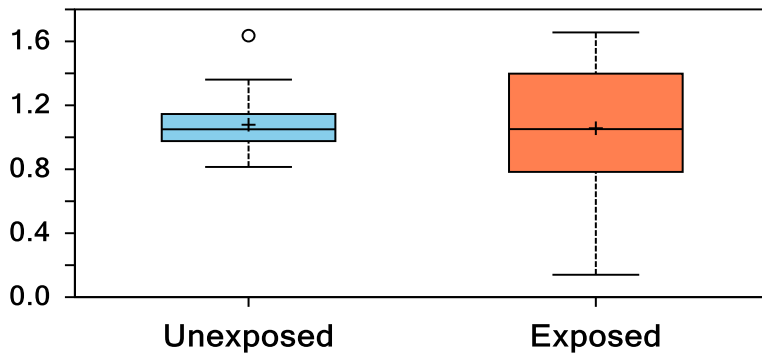

X - 14255

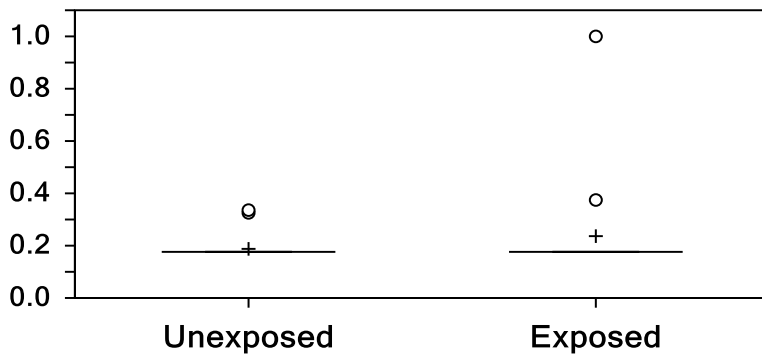

X - 14193

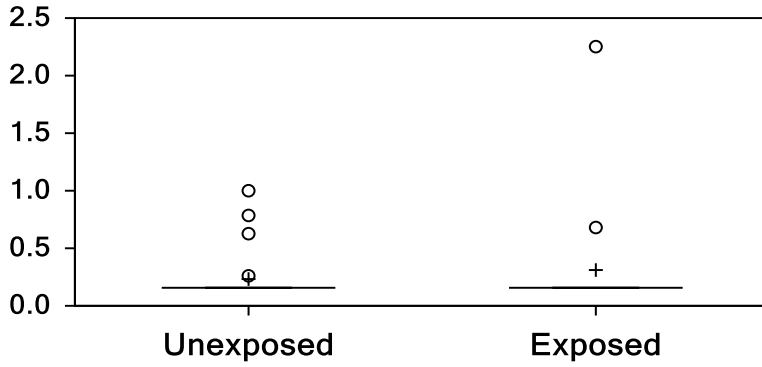

X - 14338

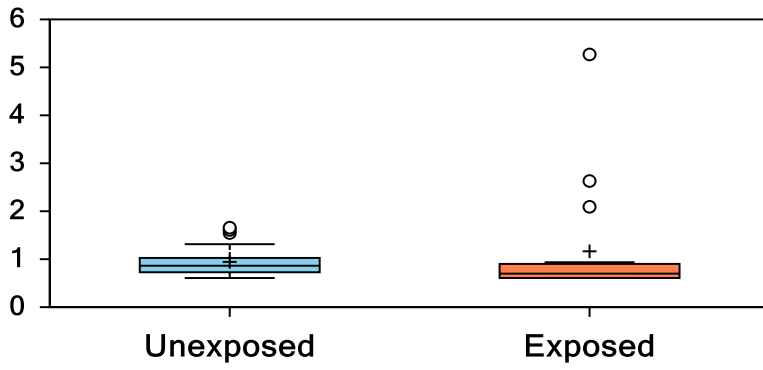

X - 14352

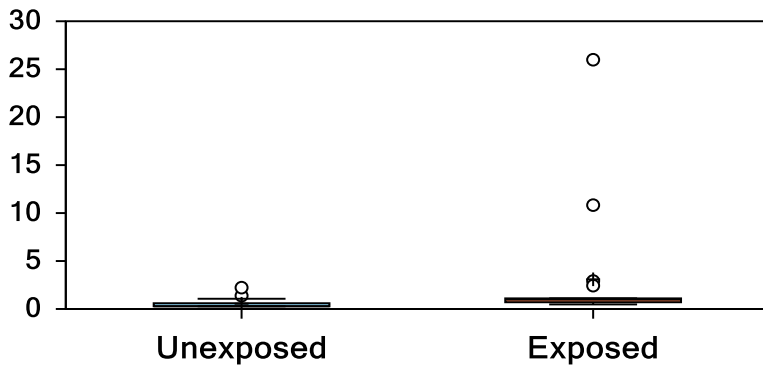

X - 14302

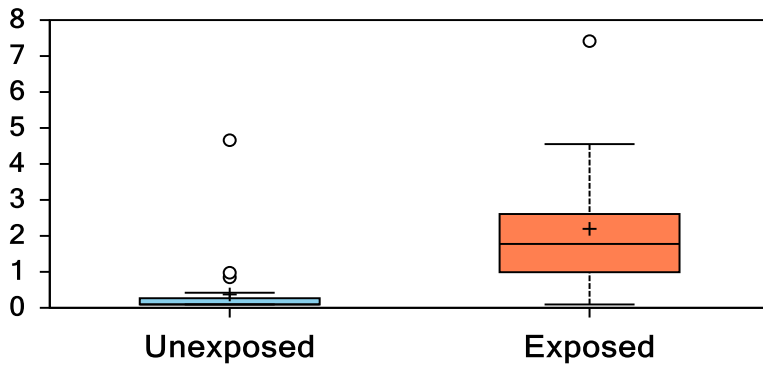

X - 15558

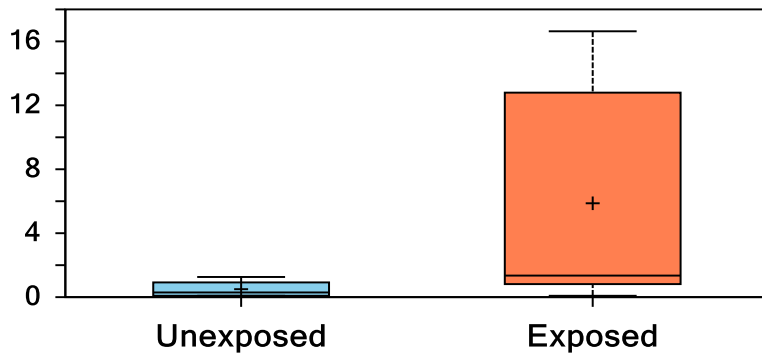

X - 15486

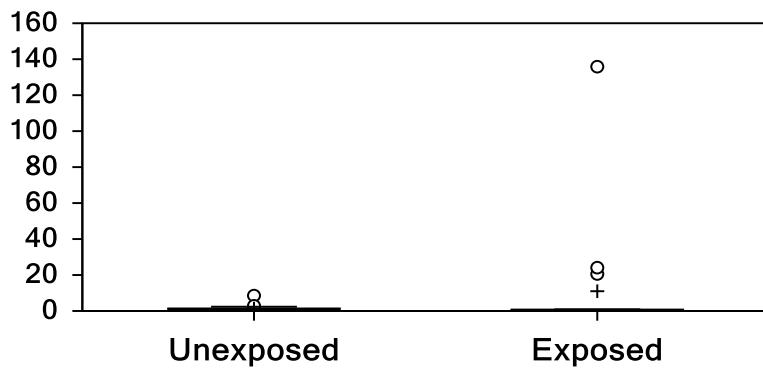

X - 15503

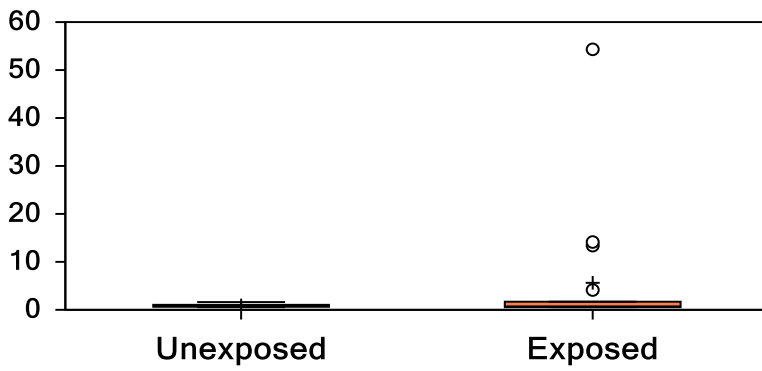



X - 15680

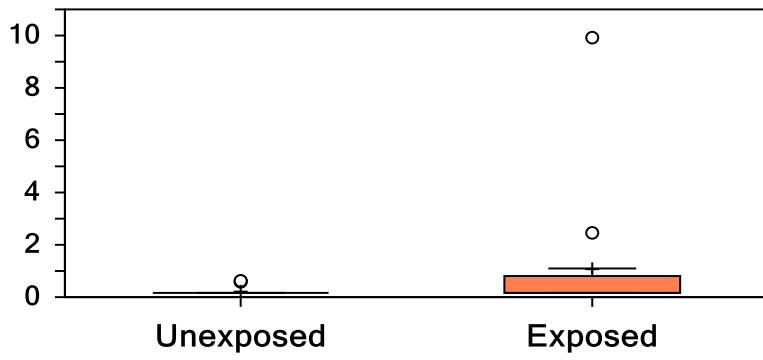

X - 15572

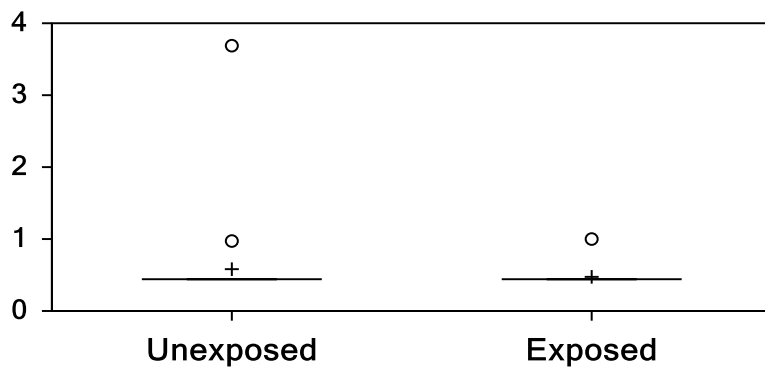

X - 14939

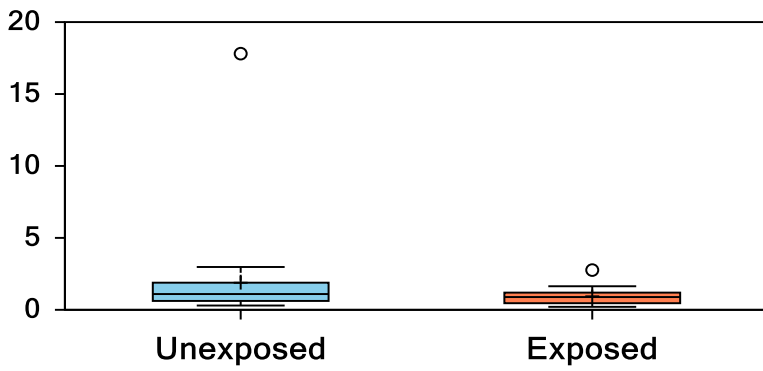

X - 14955

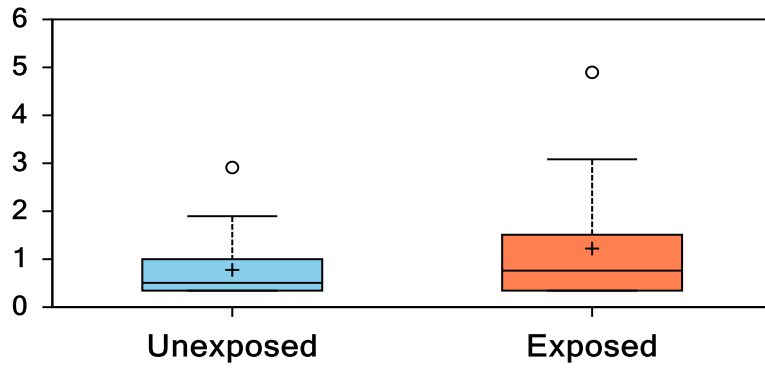

X - 14904

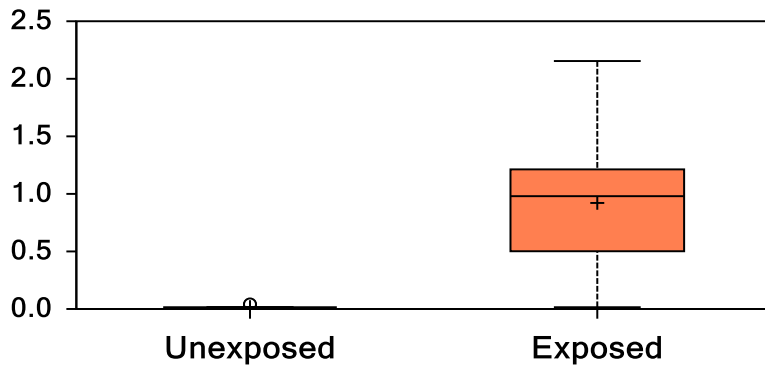

X - 15382

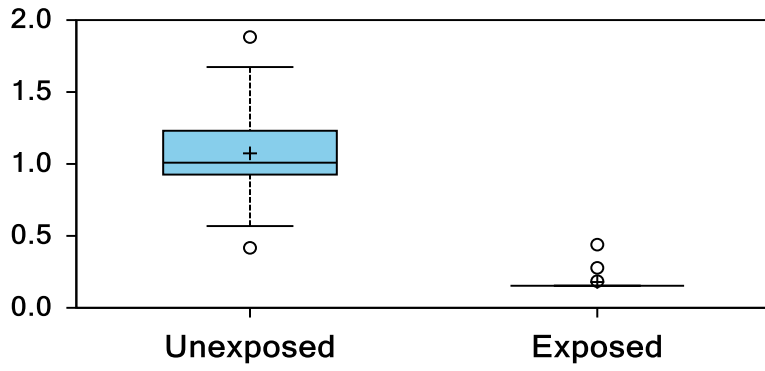

X - 15222

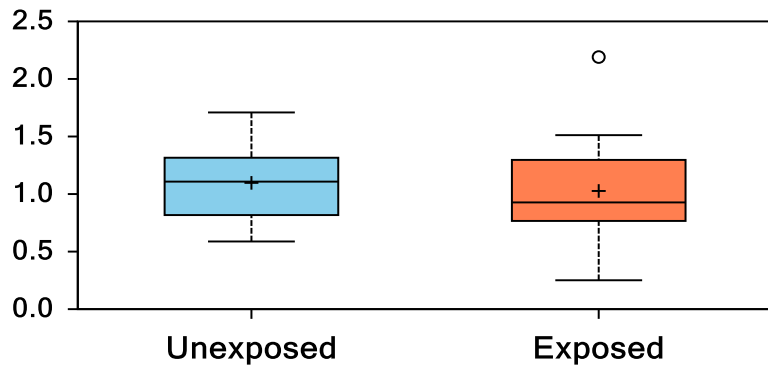

X - 15301

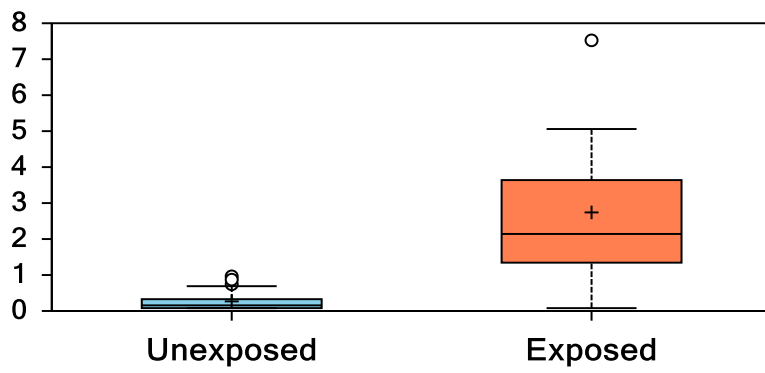

X - 17463

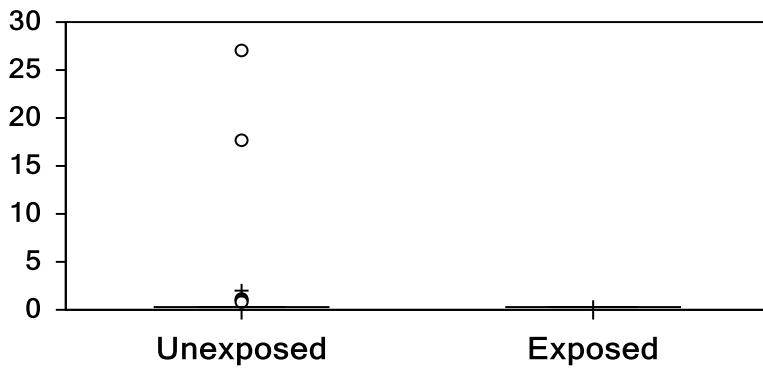

**X - 17441**

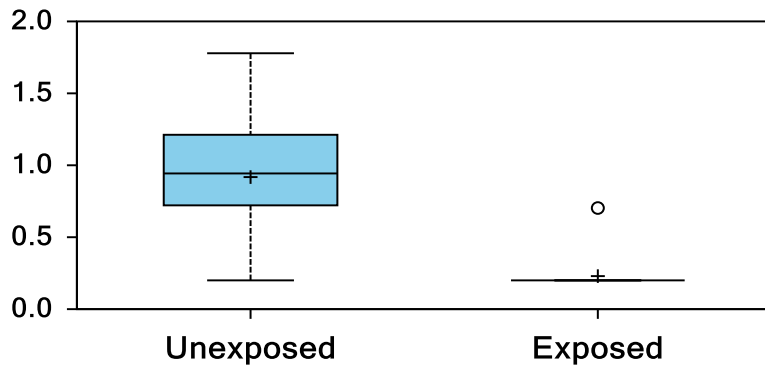

**X - 17651**

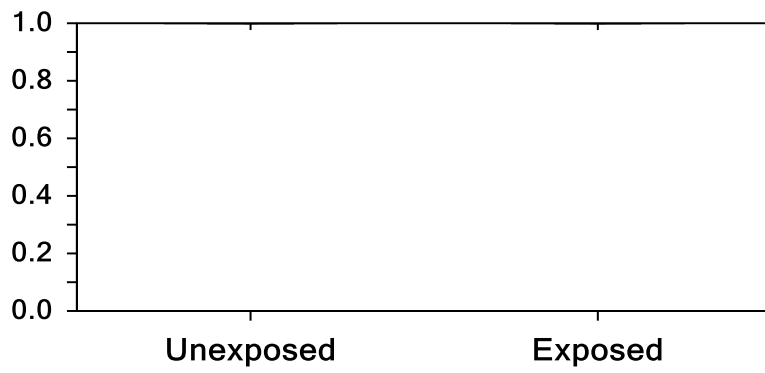

**X - 17653**

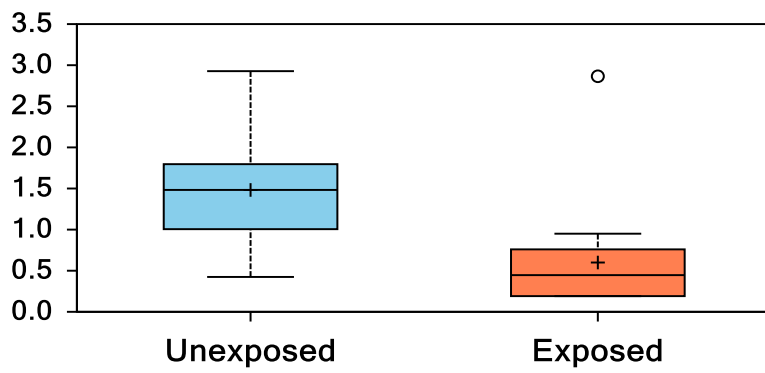

X - 17612

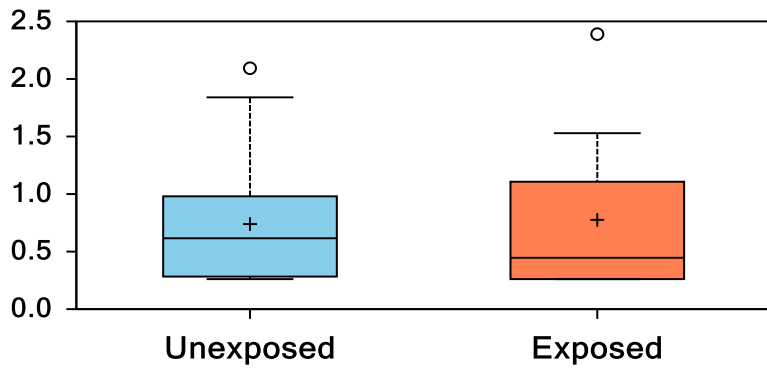

X - 17349

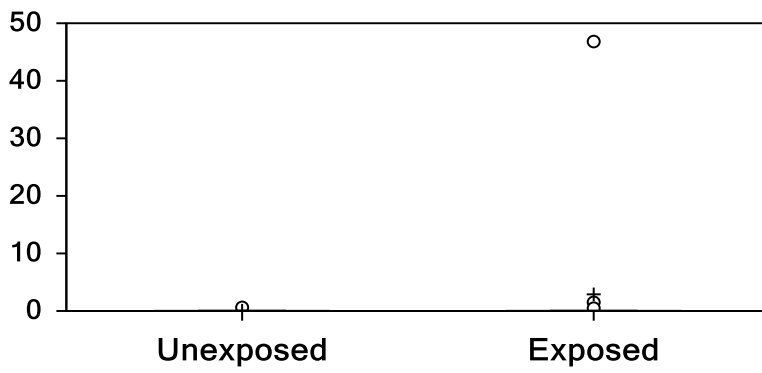

X - 17341

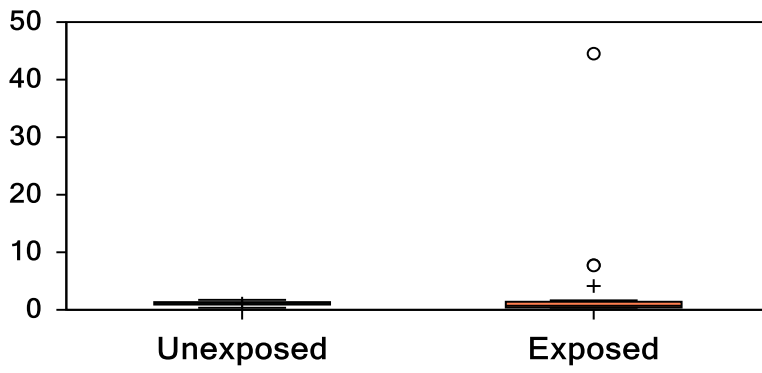

X - 17342

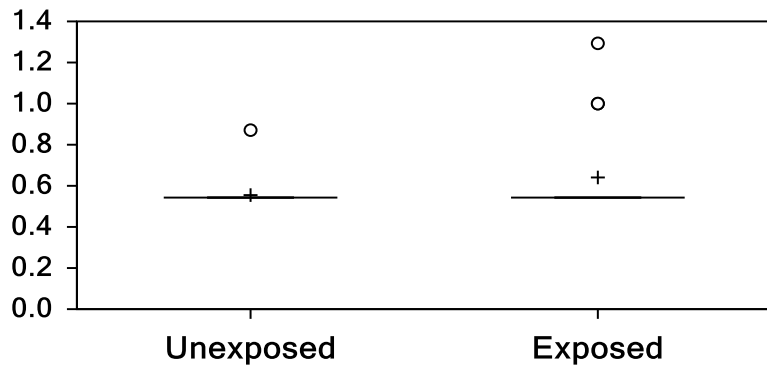

X - 17419

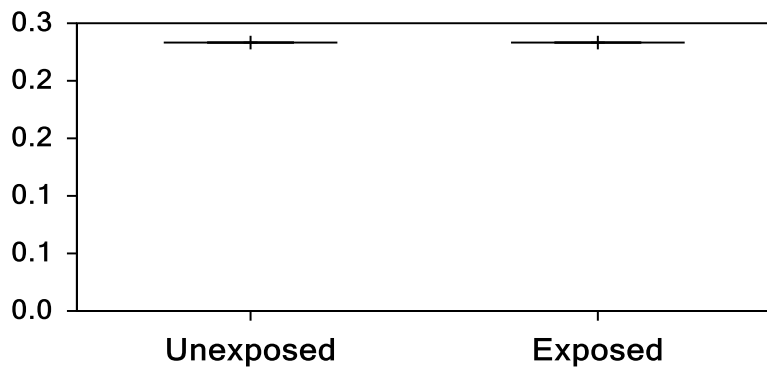

X - 17354

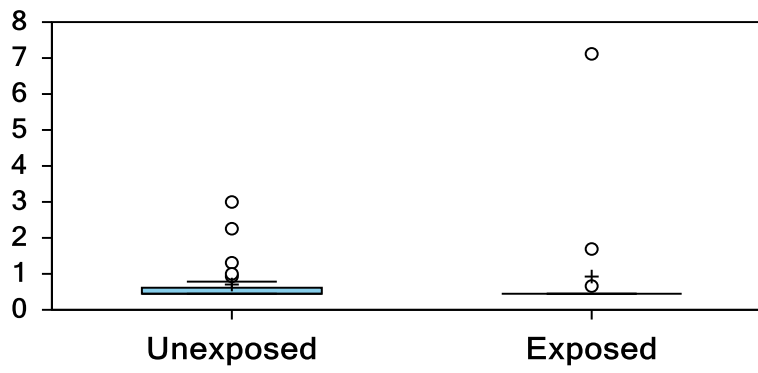

X - 17969

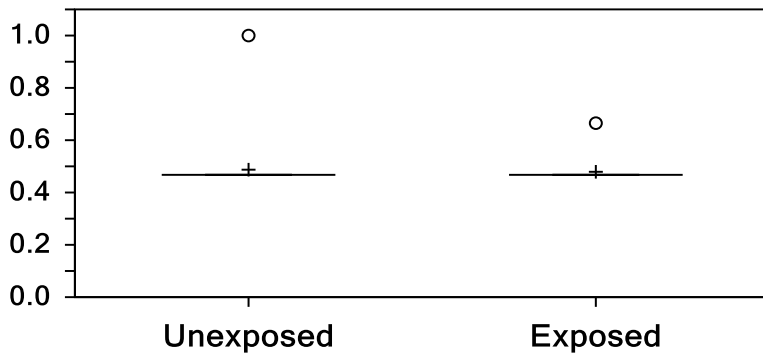

X - 17971

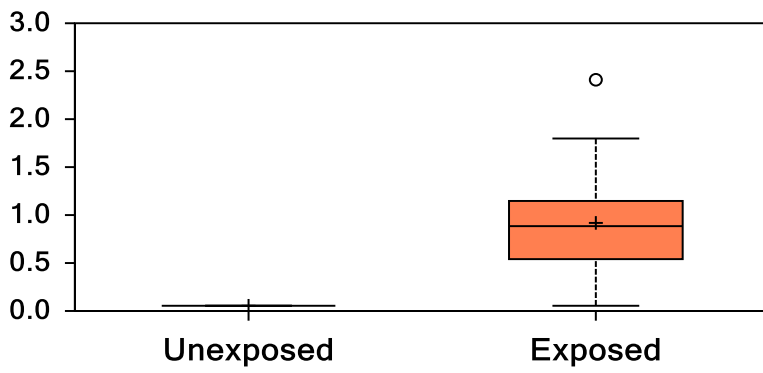

X - 17862

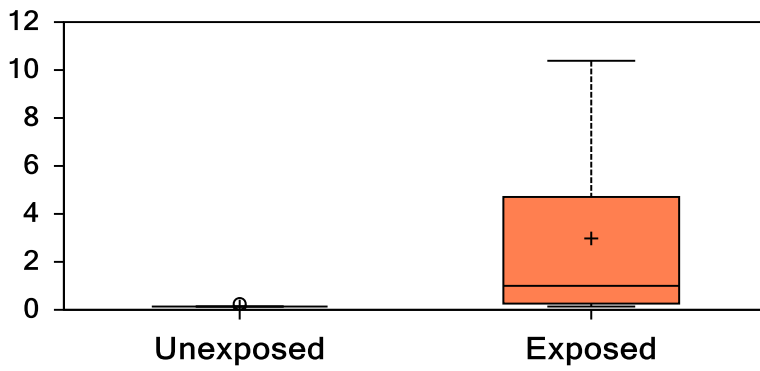

X - 18240

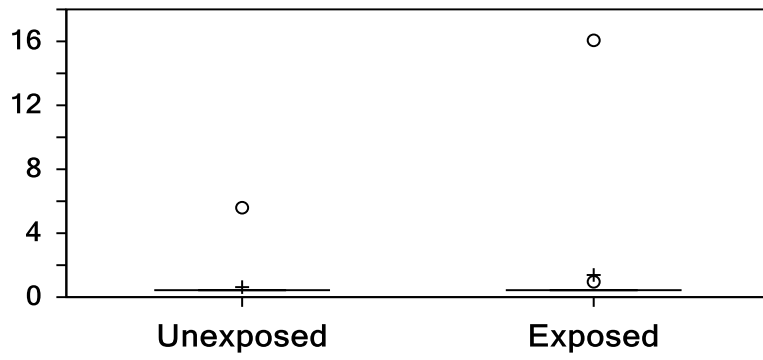

X - 18140

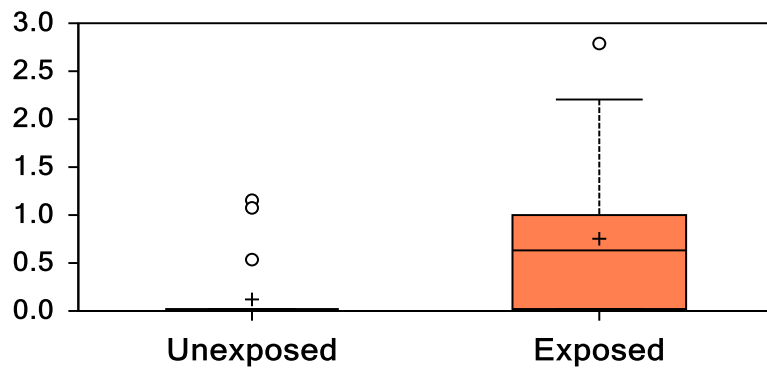

X - 18155

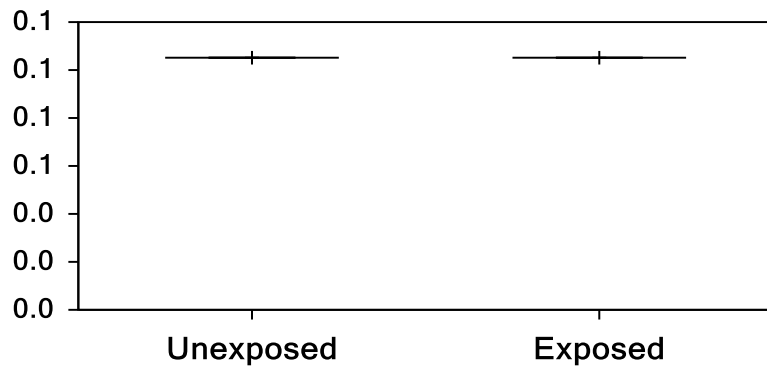



X - 17695

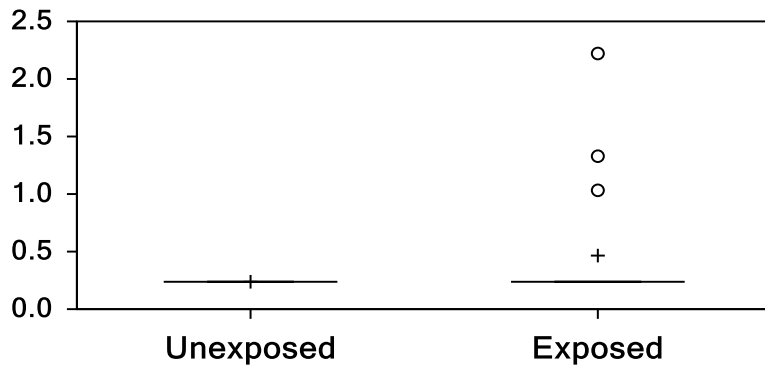

X - 17656

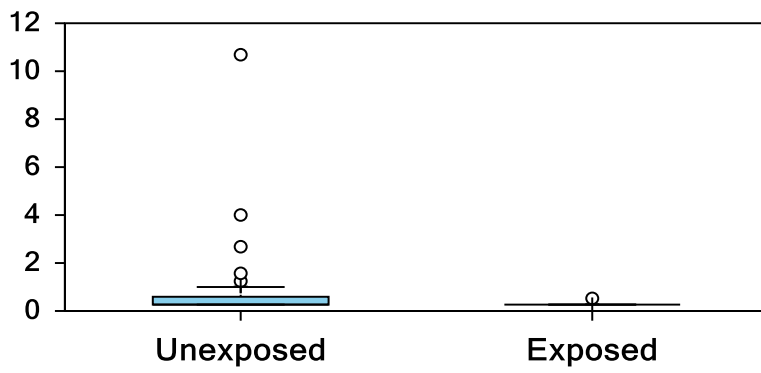

X - 17730

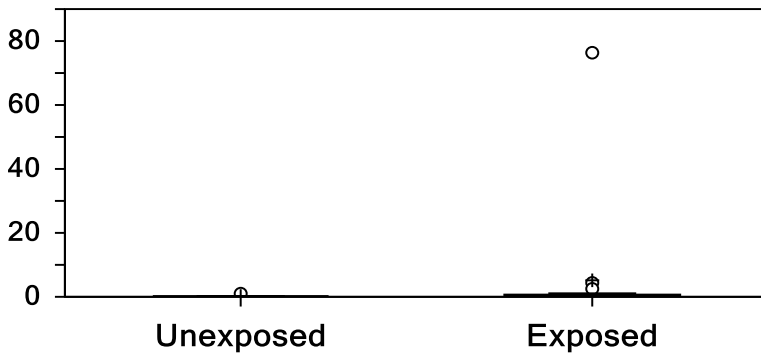

X - 17733

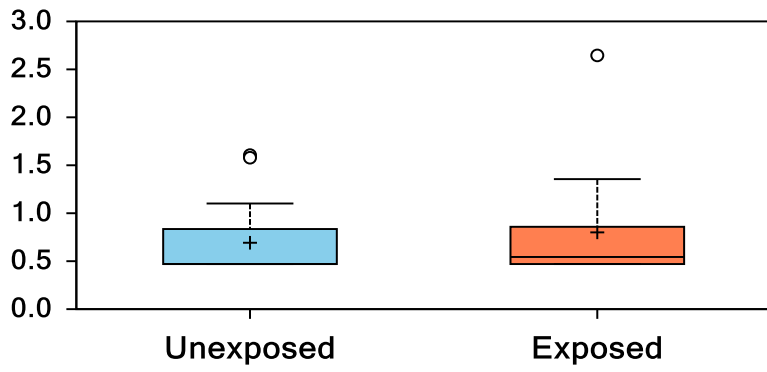

X - 17711

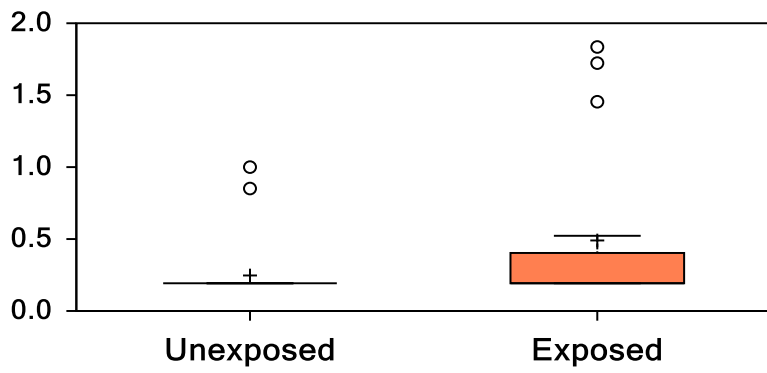

X - 17021

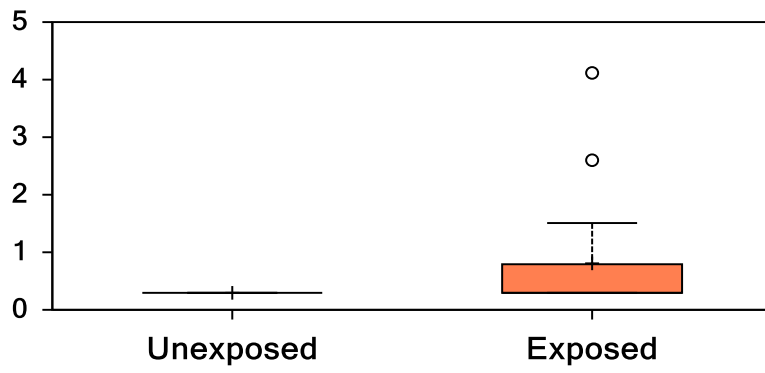

X - 16975

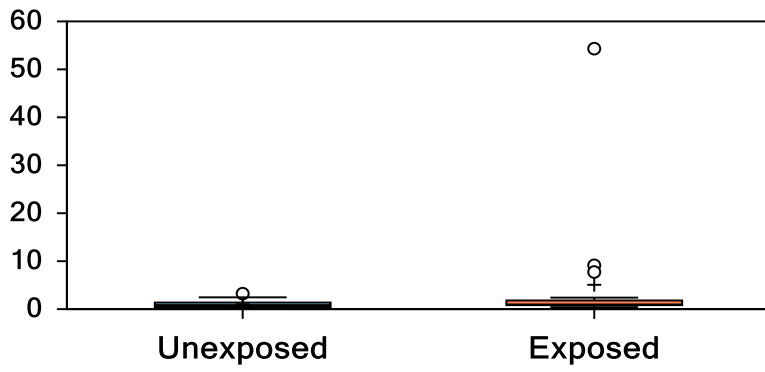

X - 16990

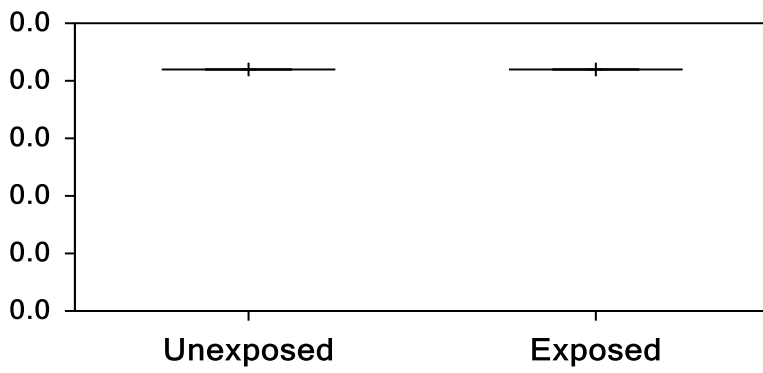

X - 17161

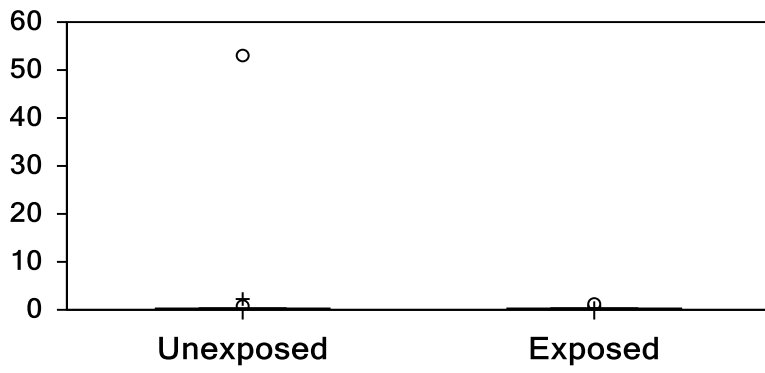

X - 17137

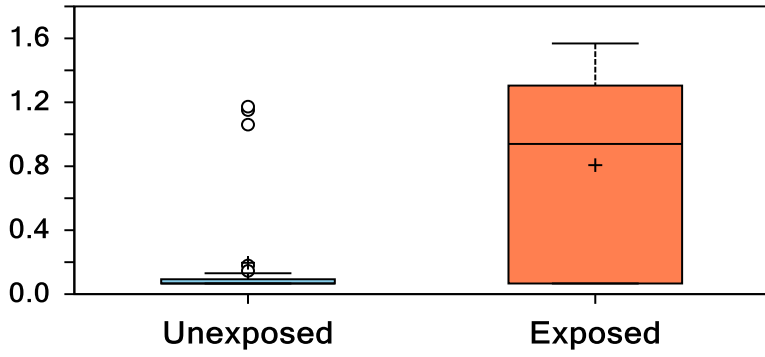

X - 16869

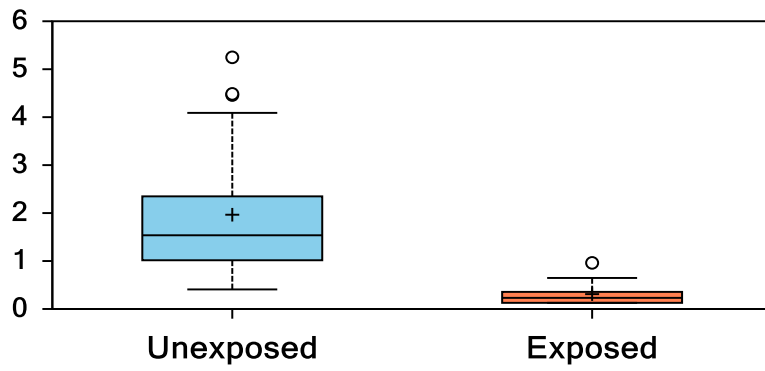

X - 16932

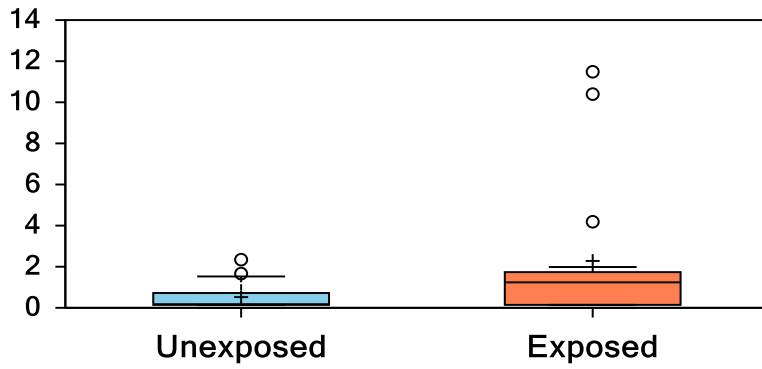

X - 16773

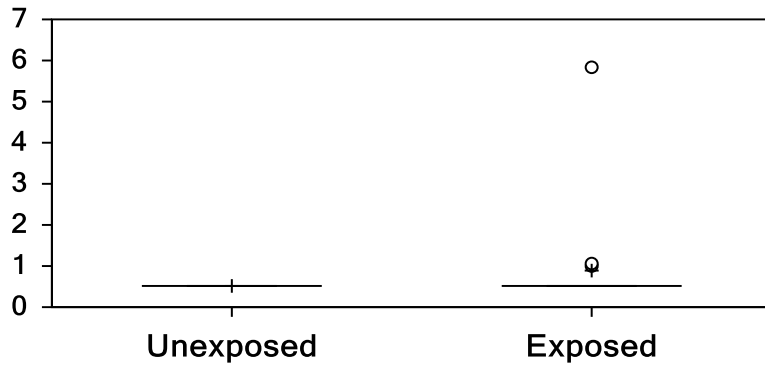

X - 16943

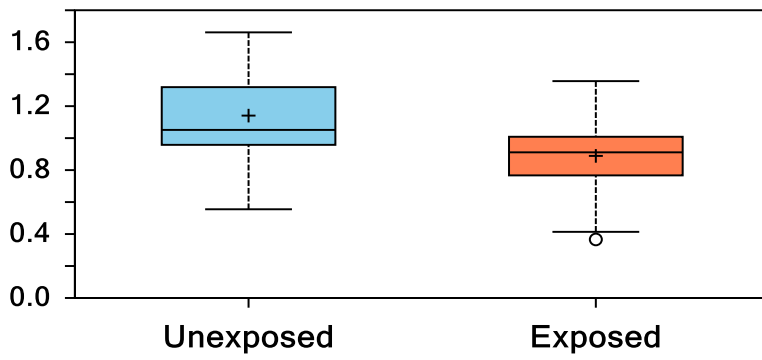

X - 16935

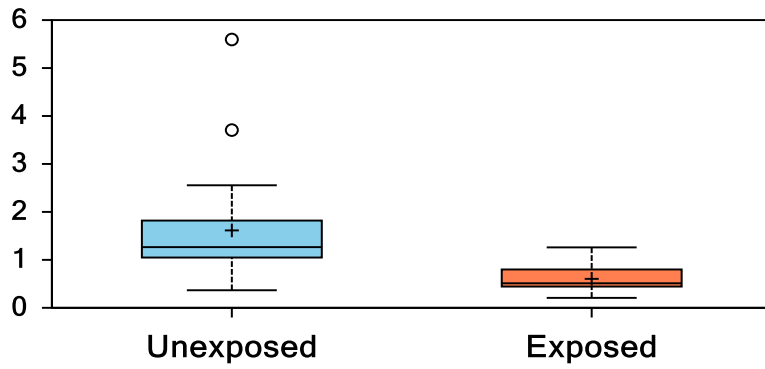

X - 16938

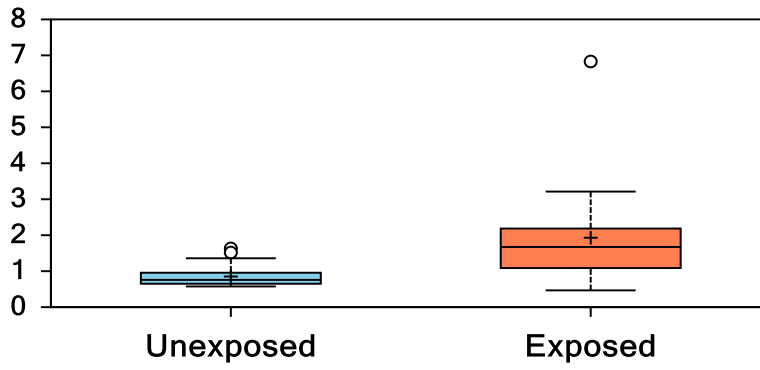

X - 17326

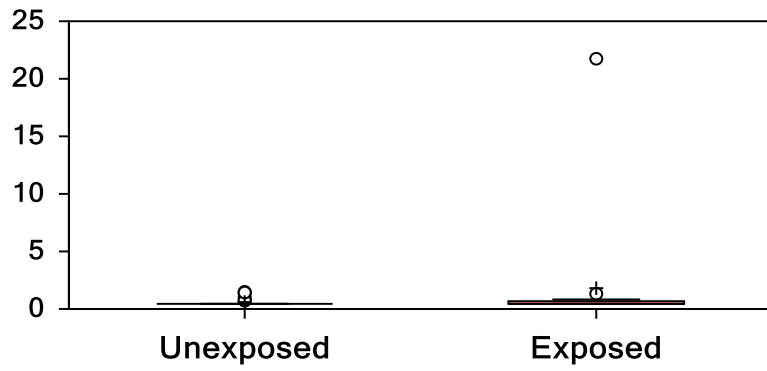

X - 17314

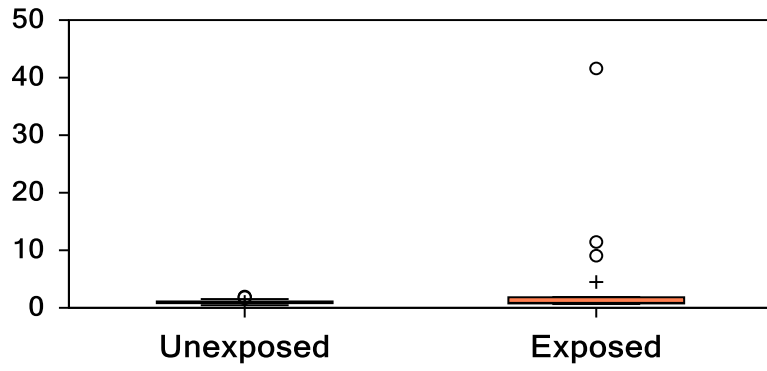

X - 17336

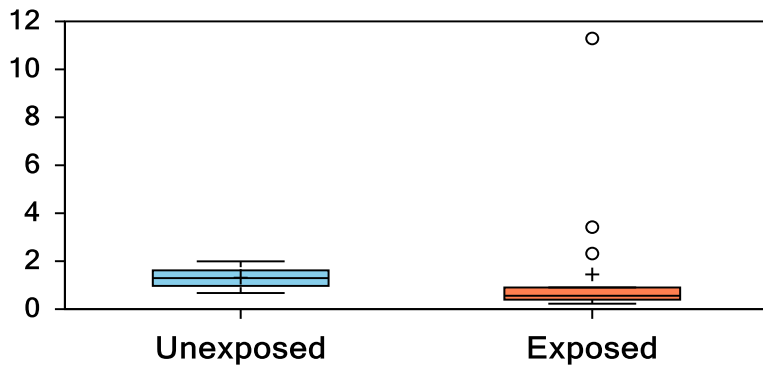

X - 17337

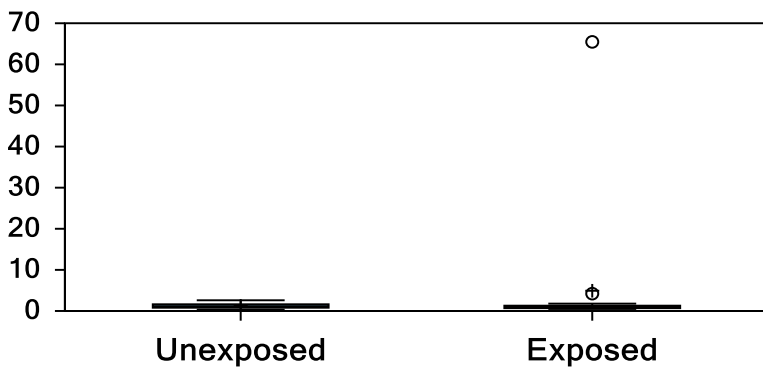

X - 17334

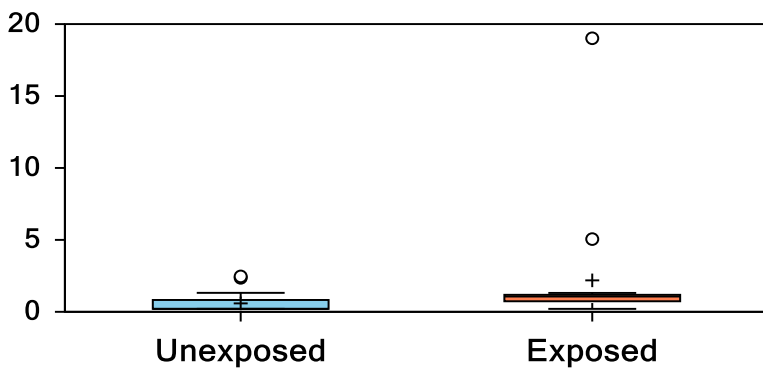

X - 17185

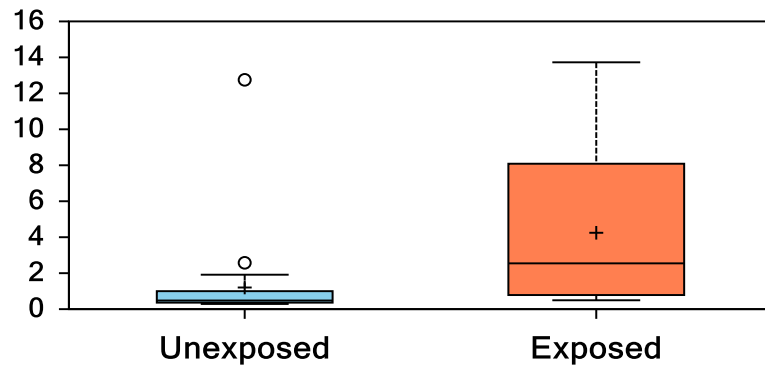

X - 17167

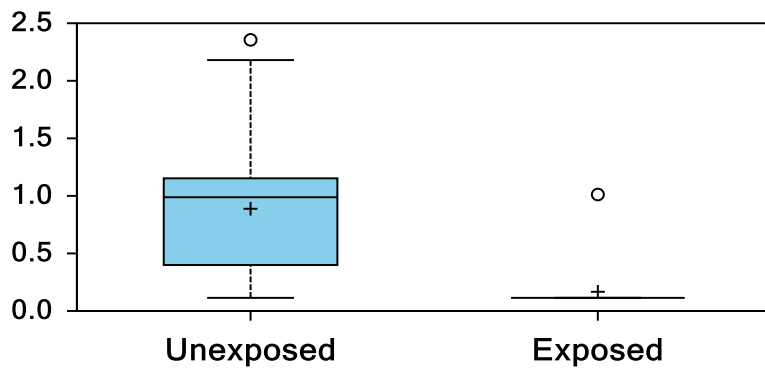

X - 17179

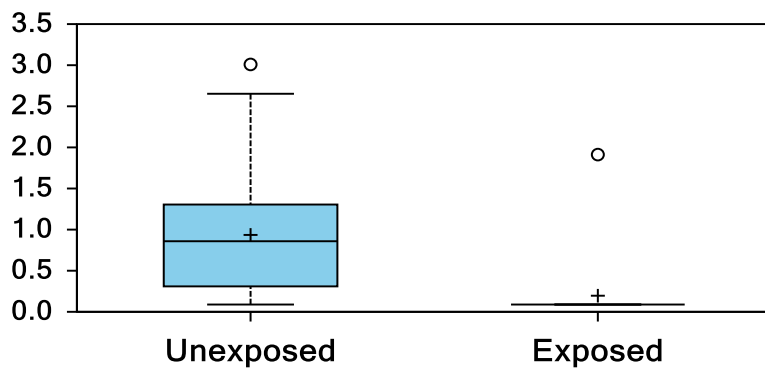



X - 17310

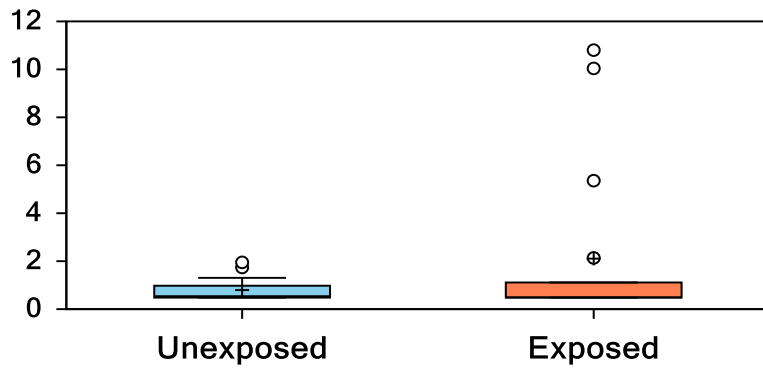

X - 17254

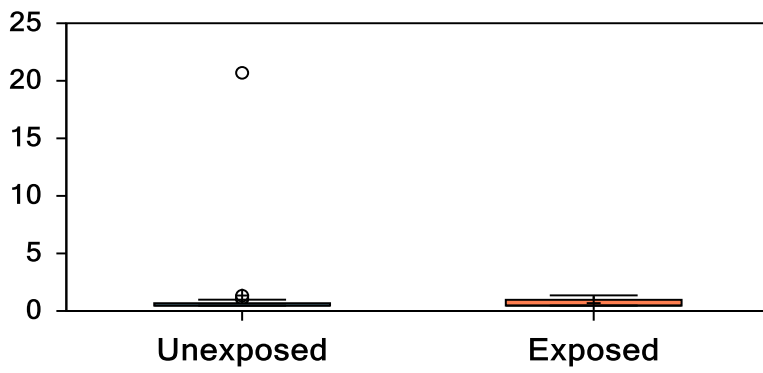

X - 12001

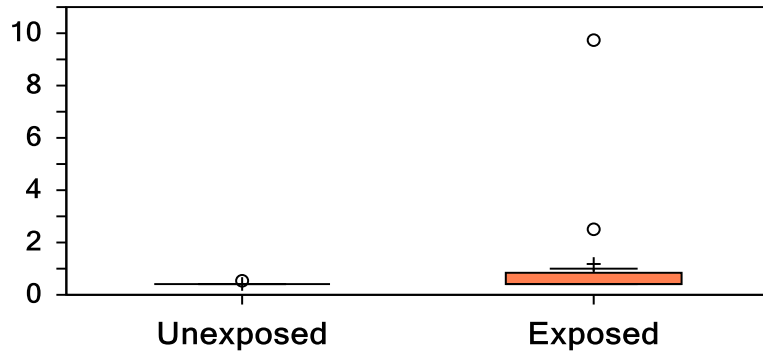

X - 12029

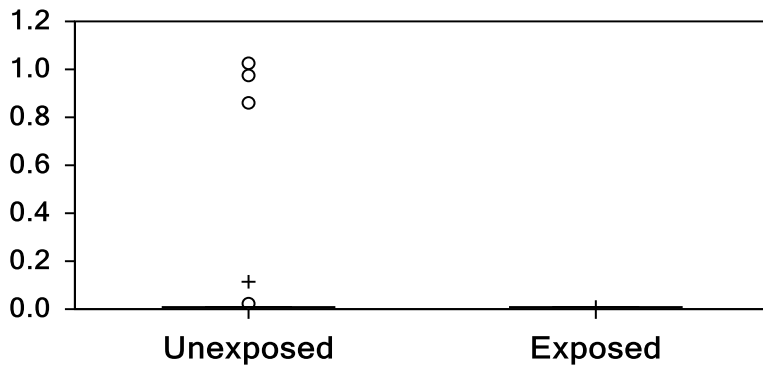

X - 11945

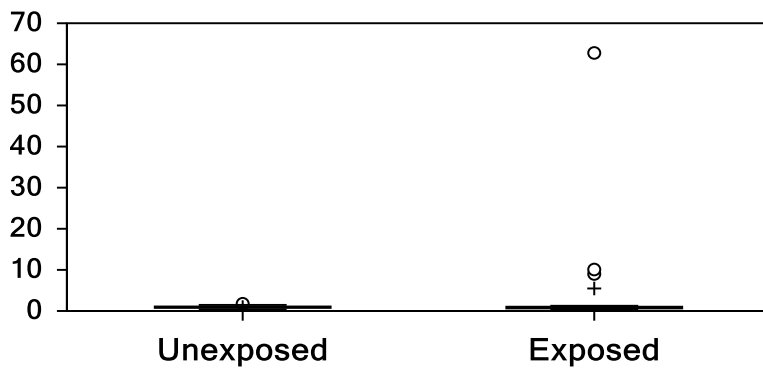

X - 12063

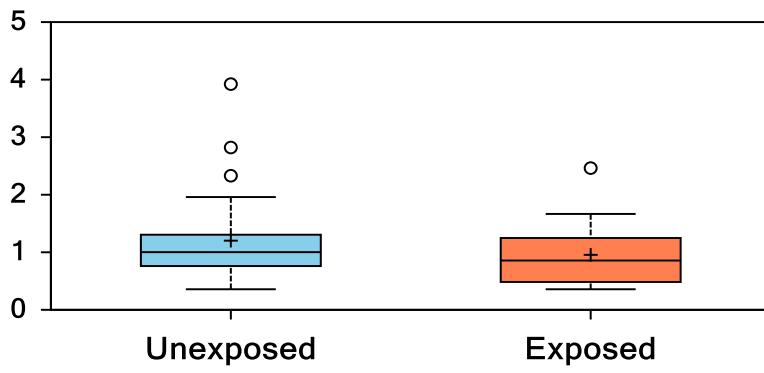

X - 12040

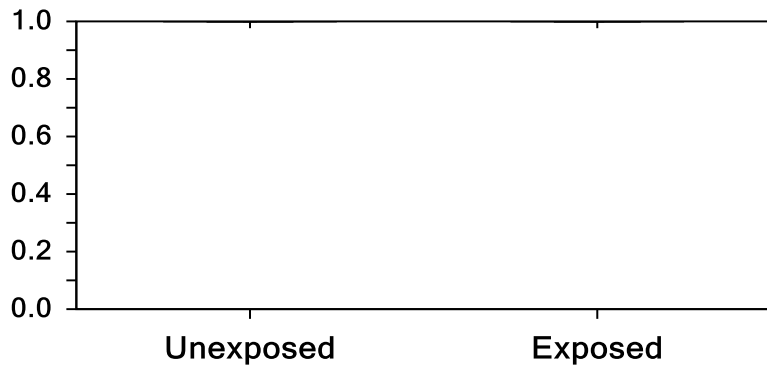

X - 12051

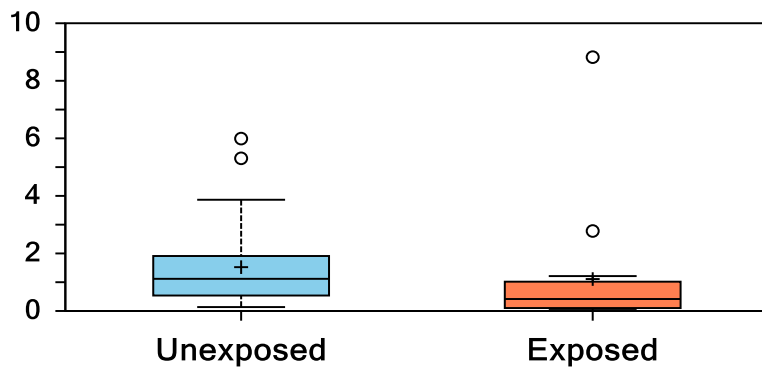

X - 11843

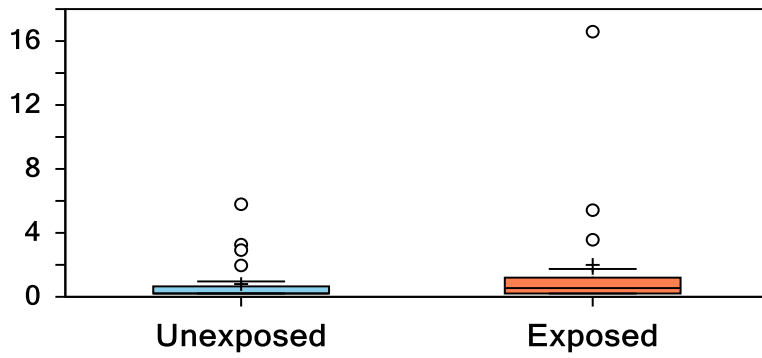

X - 11805

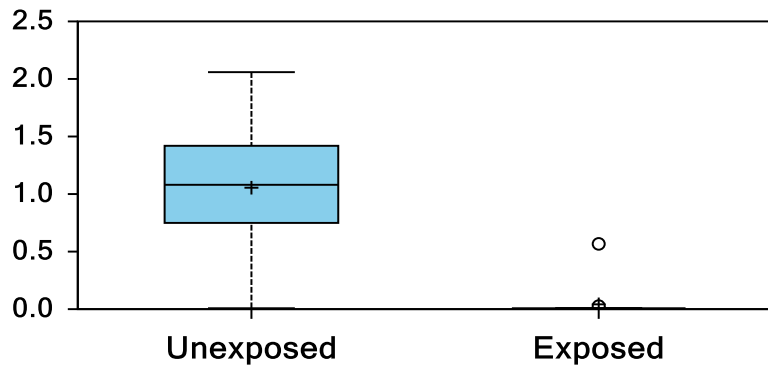

X - 11858

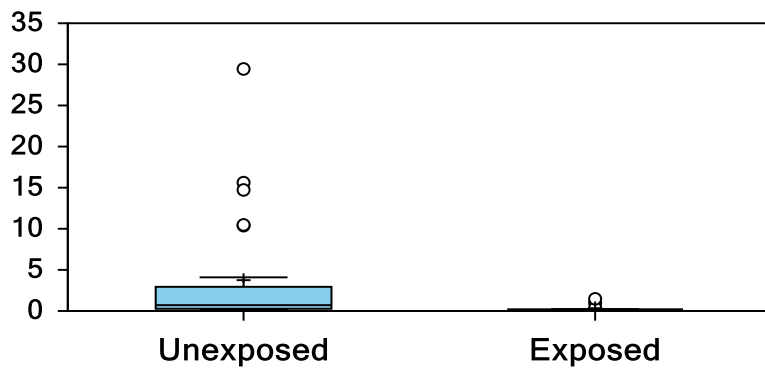

X - 11861

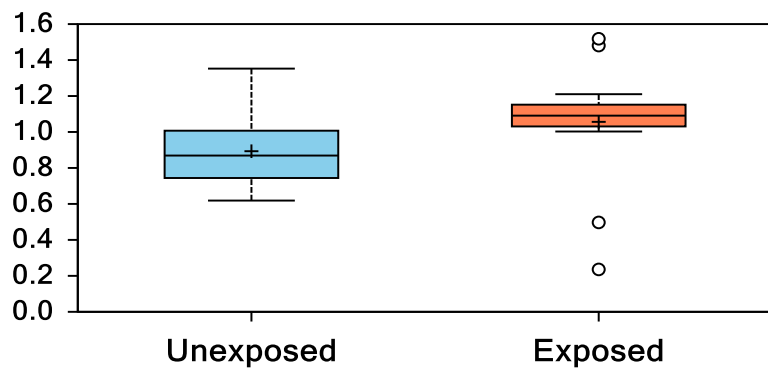

X - 11850

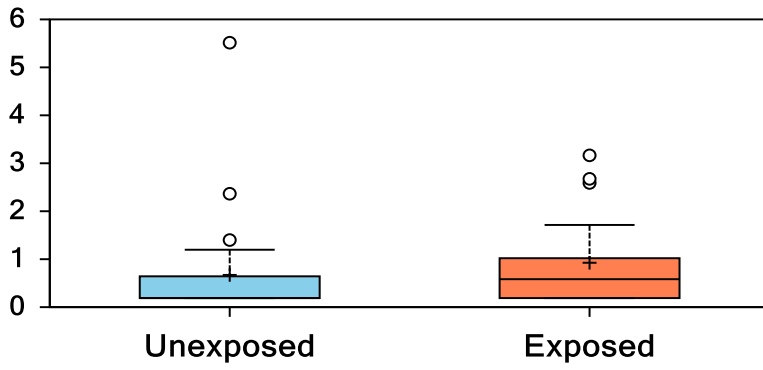

X - 12211

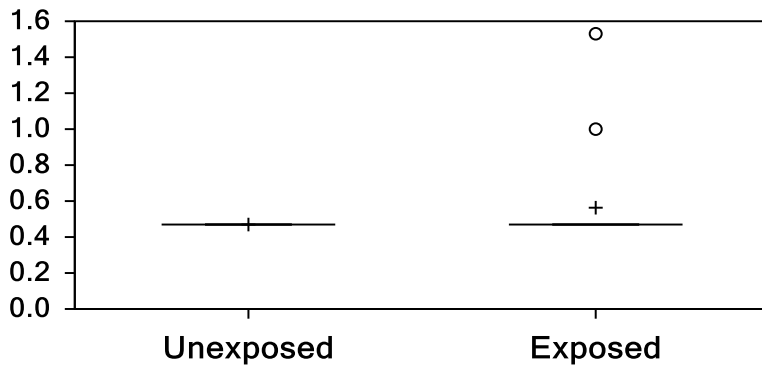

X - 12212

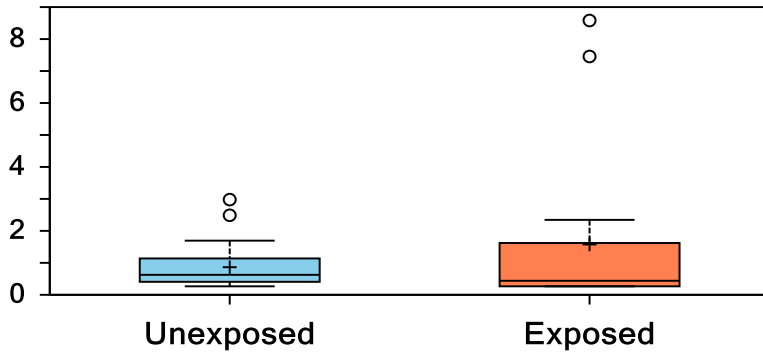

X - 12199

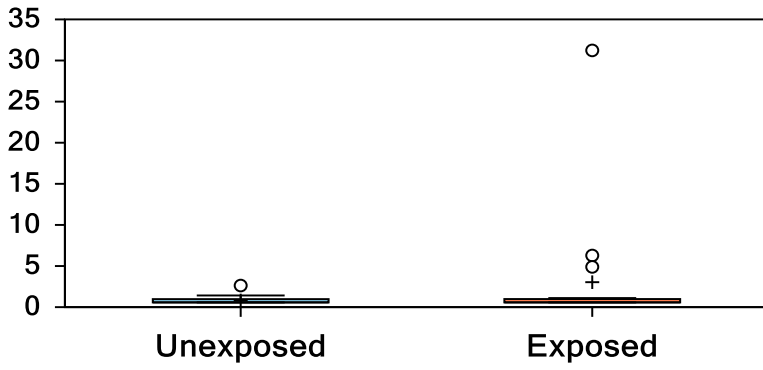

X - 12244

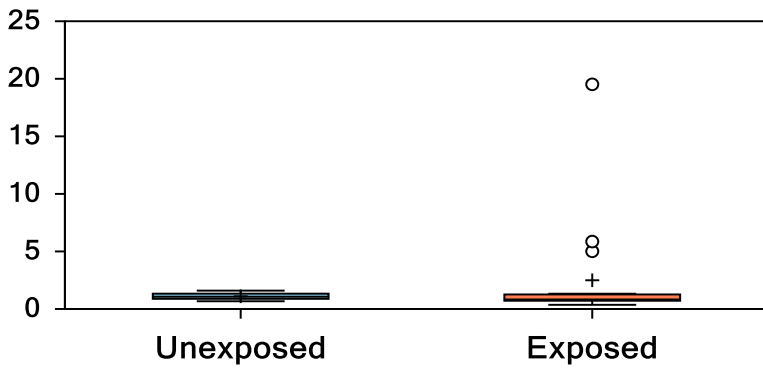

X - 12231

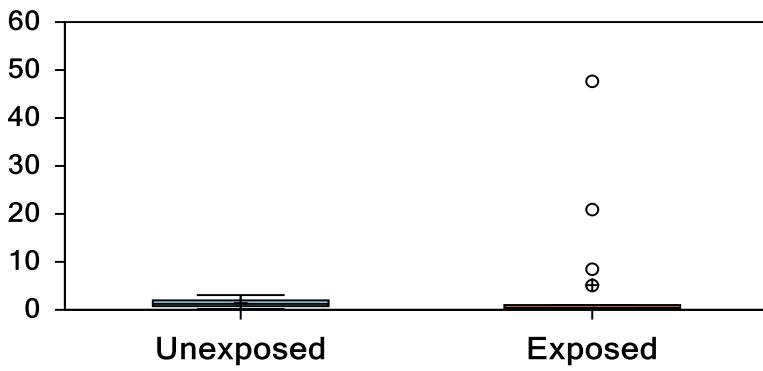

X - 12234

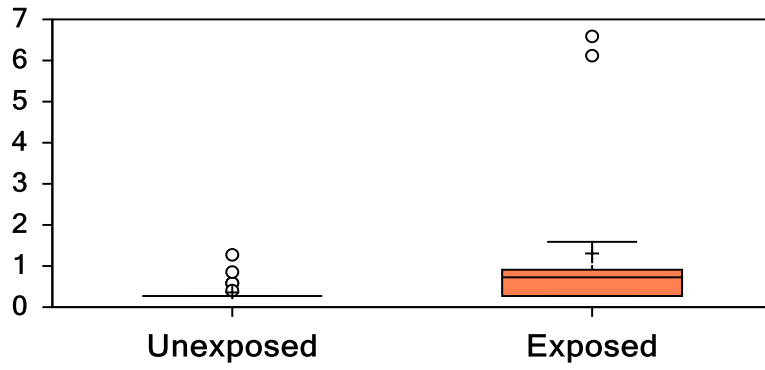

X - 12117

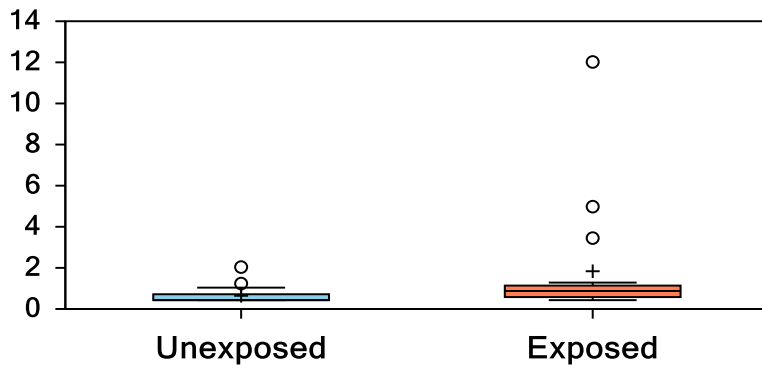

X - 12100

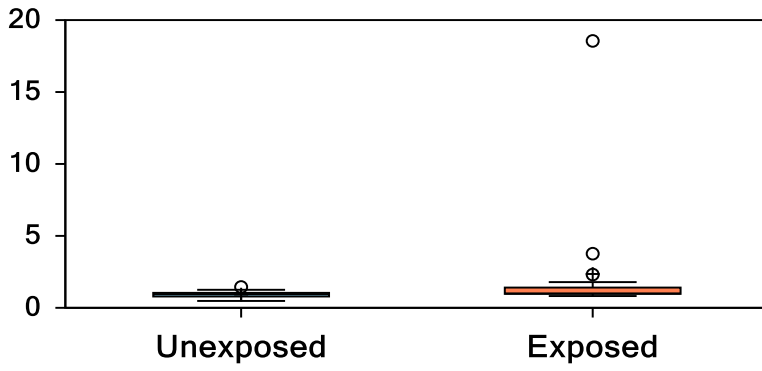

X - 12131

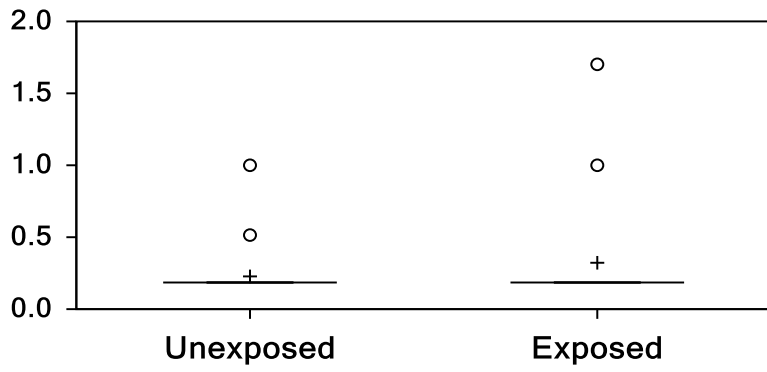

X - 12161

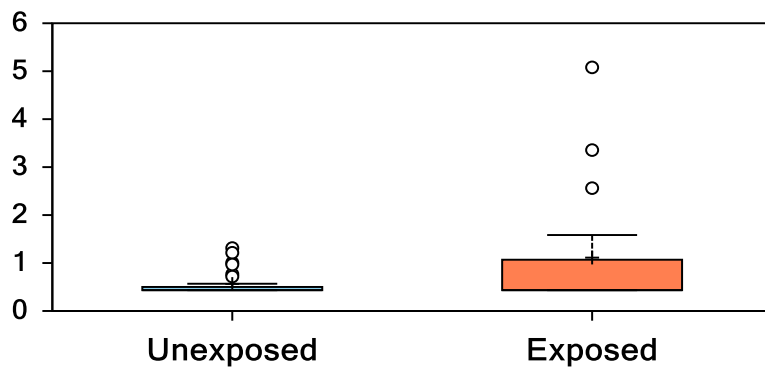

X - 12124

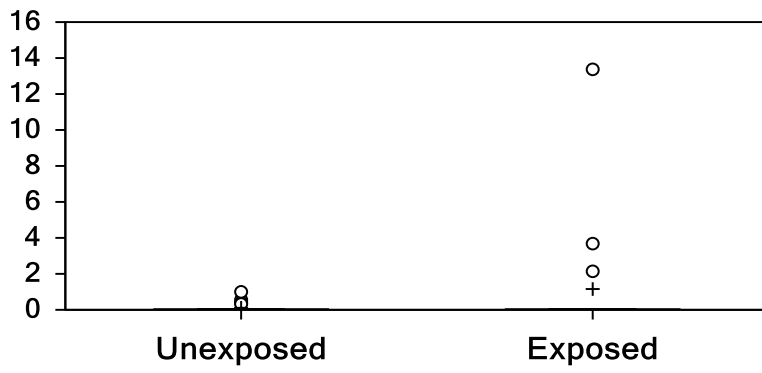



X - 11378

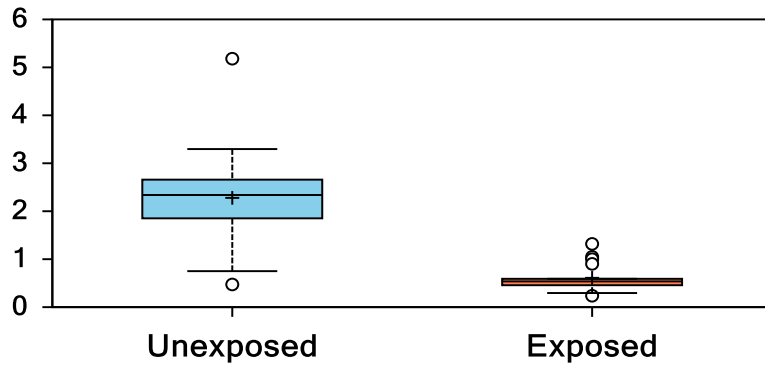

X - 11381

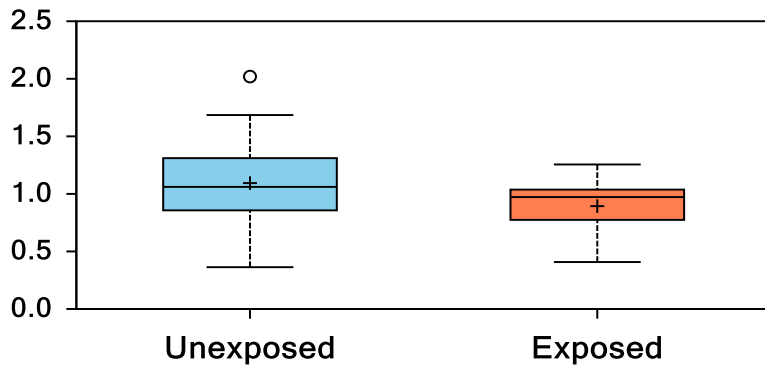

X - 11360

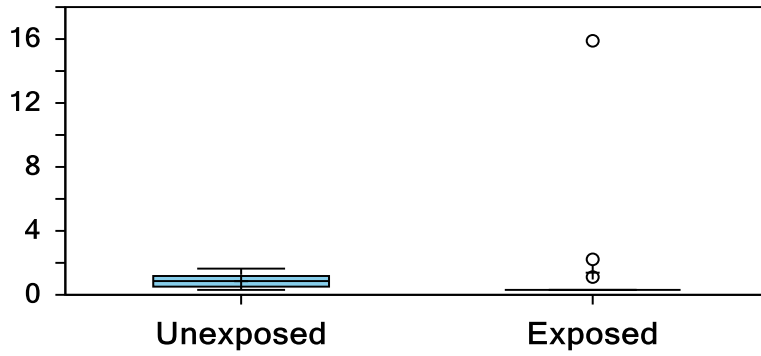

X - 11437

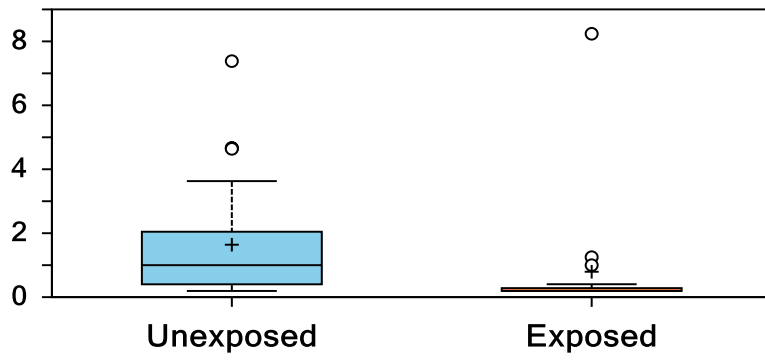

X - 11412

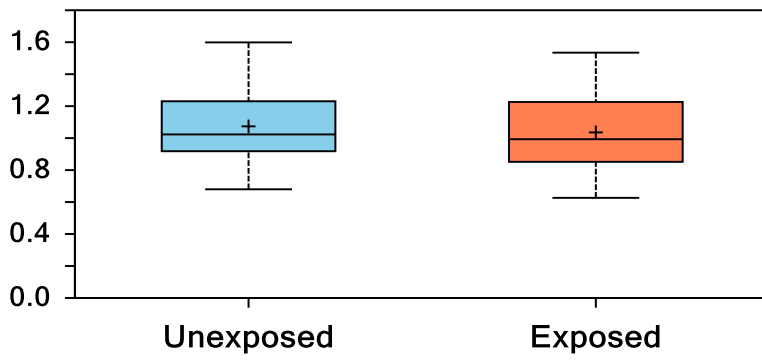

X - 11423

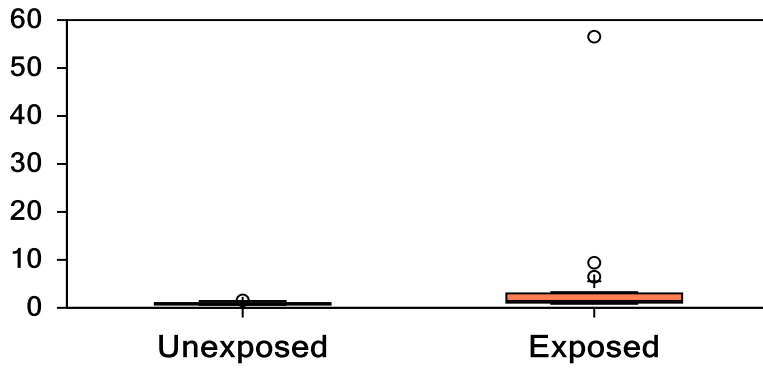

X - 09789

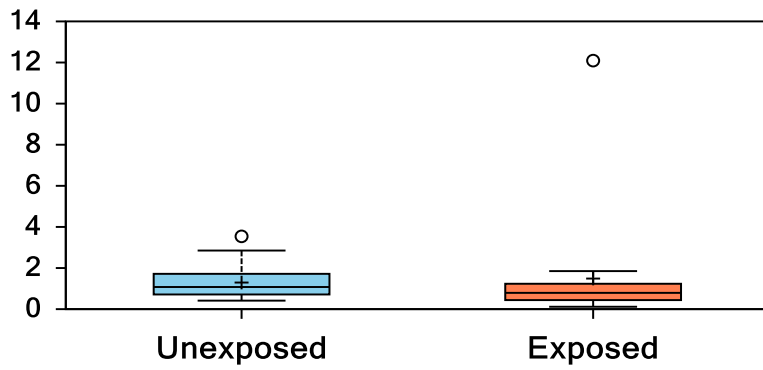

X - 01911

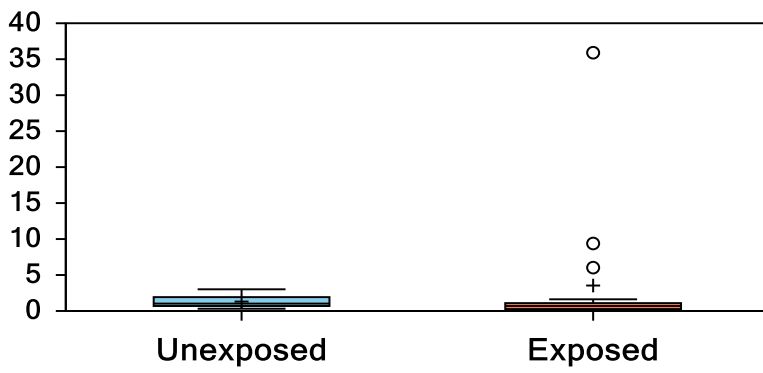

X - 11308

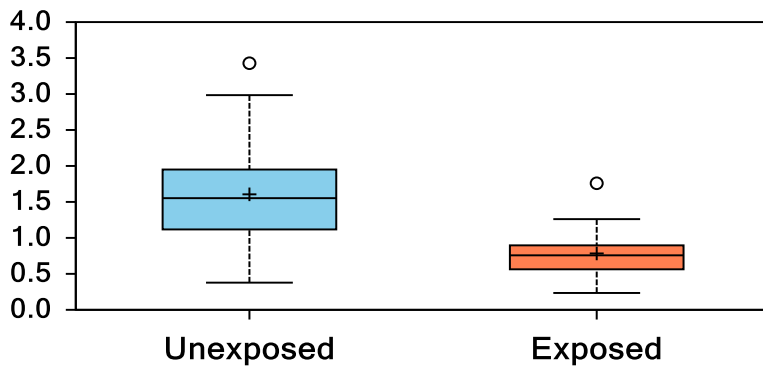

X - 11315

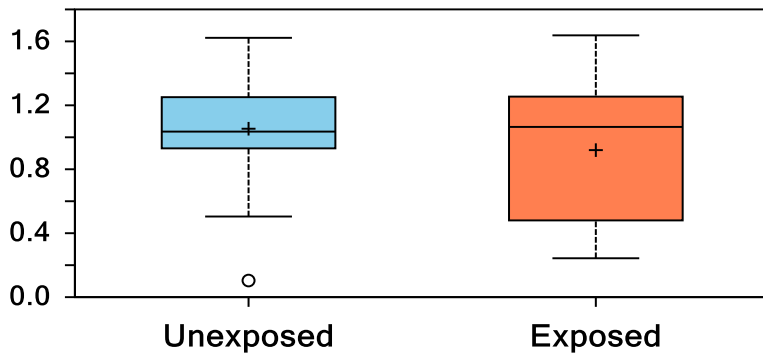

X - 11299

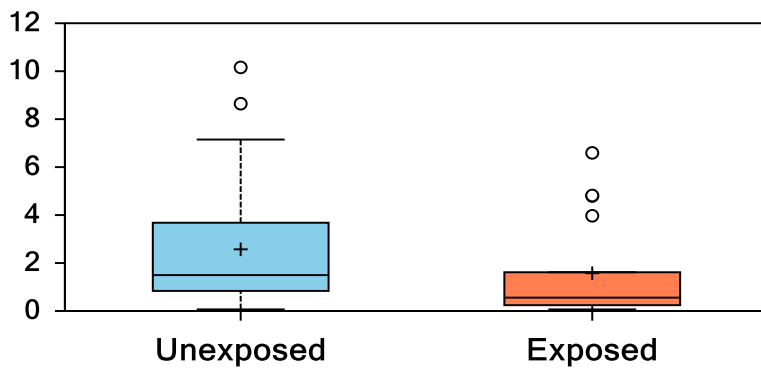

X - 11550

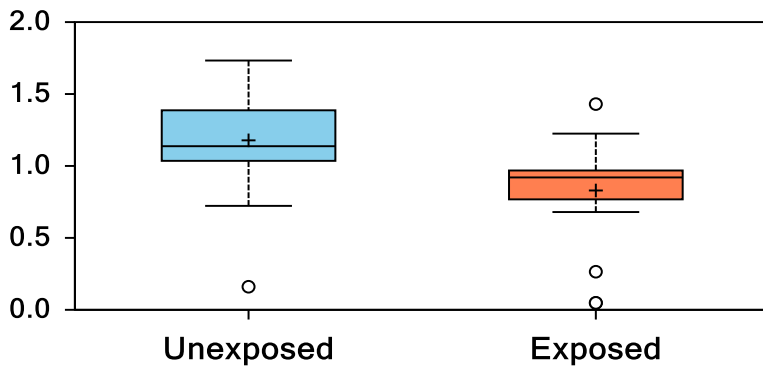

X - 11561

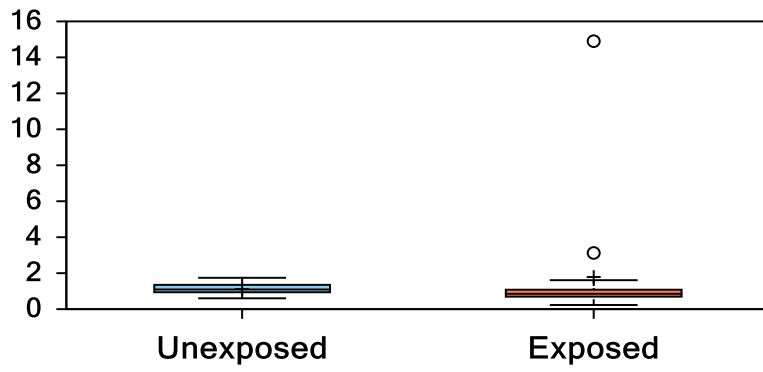

X - 11542

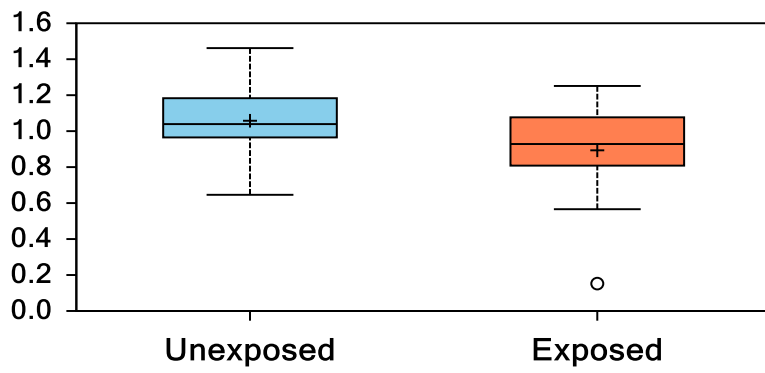

X - 11736

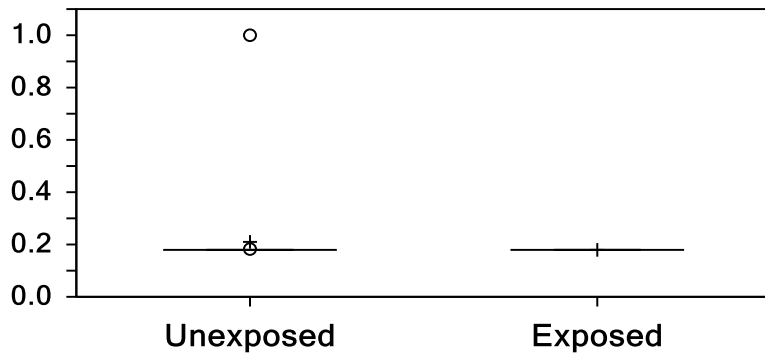

X - 11662

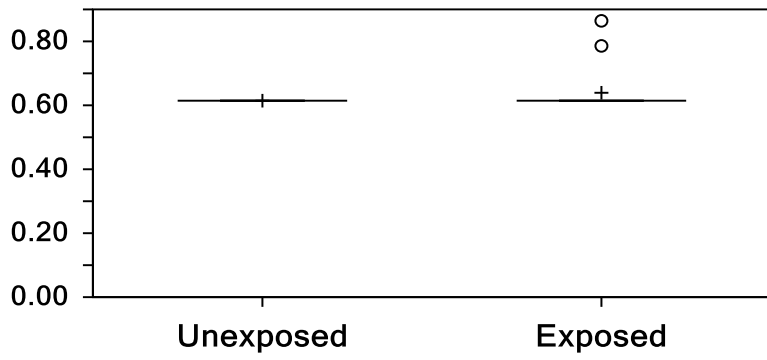

X - 11668

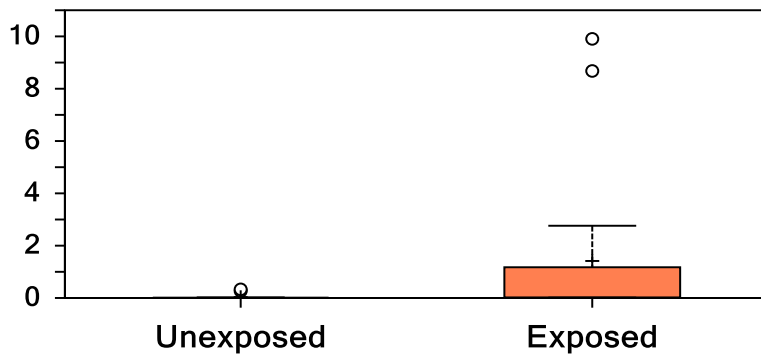

X - 11485

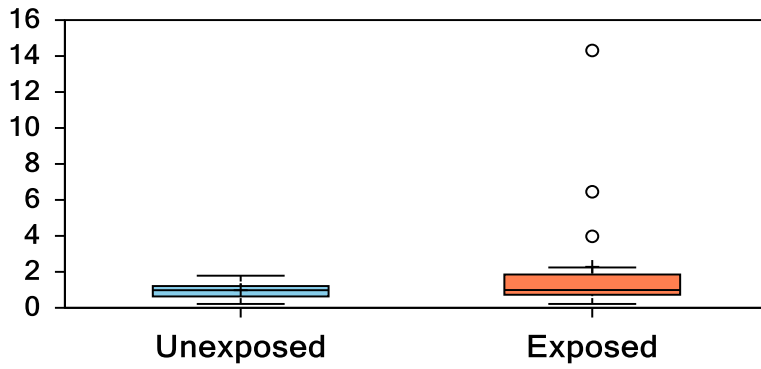

X - 11444

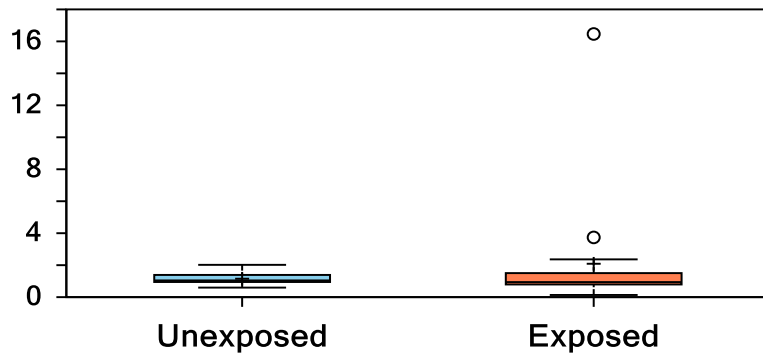

X - 11530

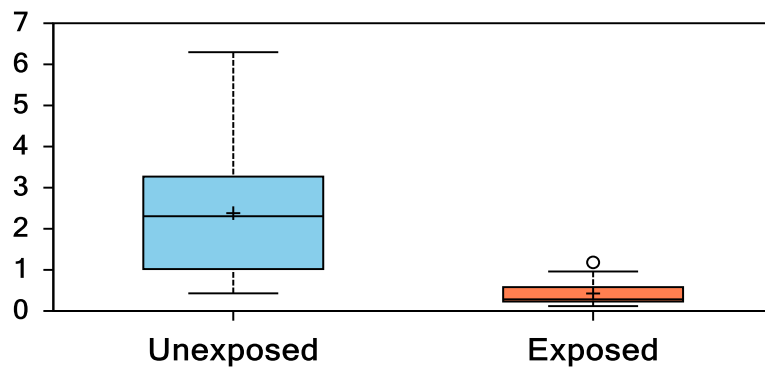

X - 11533

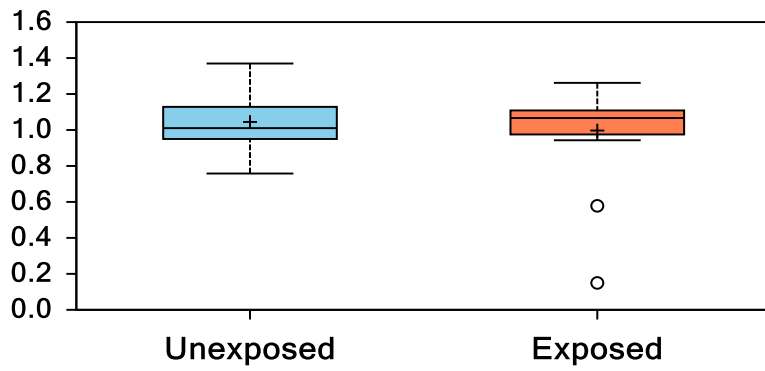

X - 11522

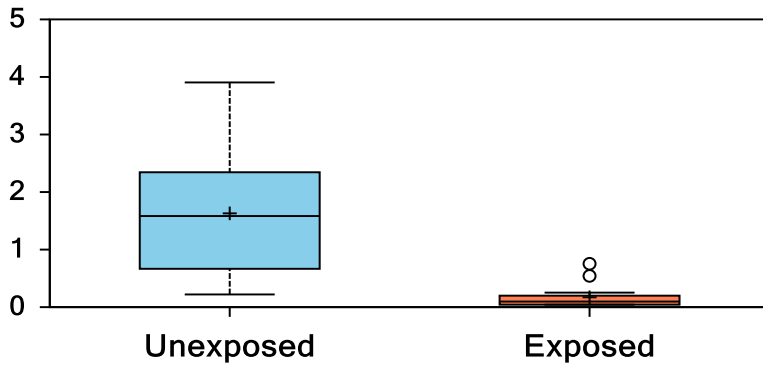

X - 13658

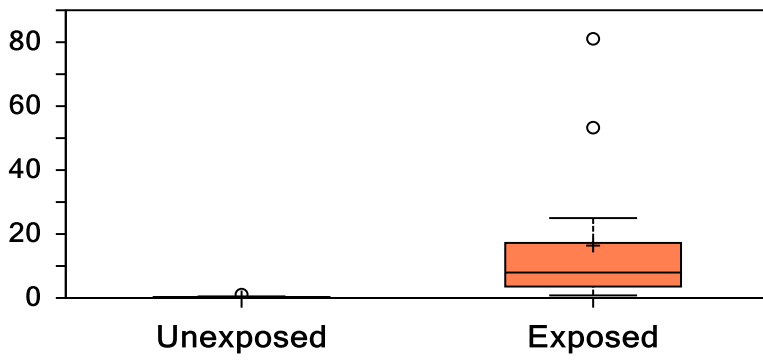

X - 13529

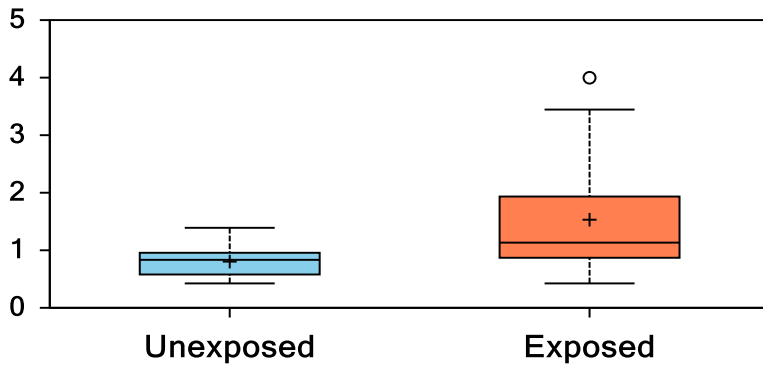



X - 13543

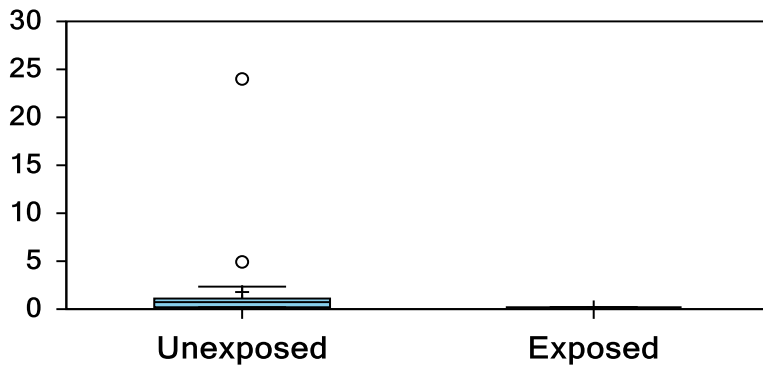

X - 13734

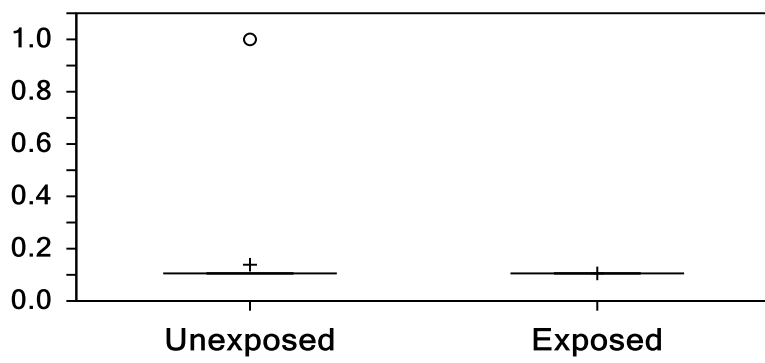

X - 13699

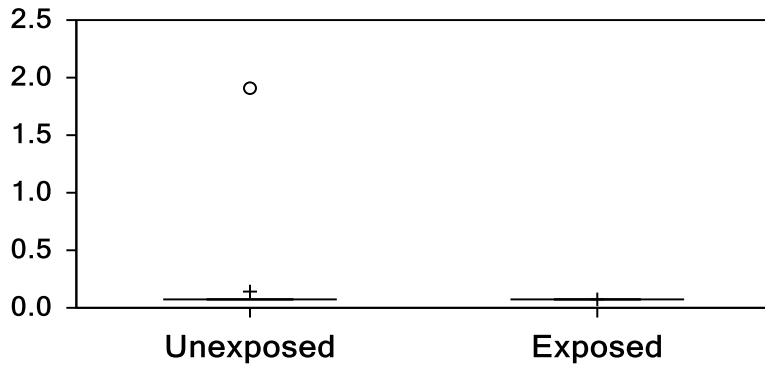

X - 13007

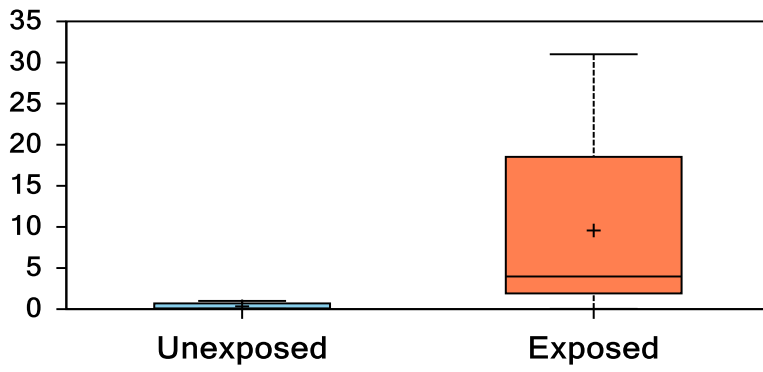

X - 13069

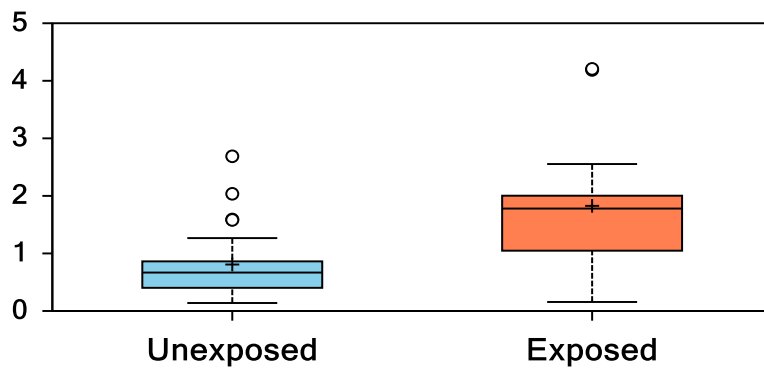

X - 12889

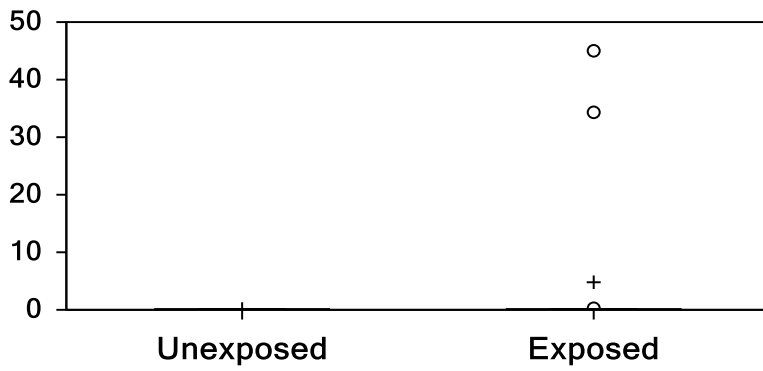

X - 13429

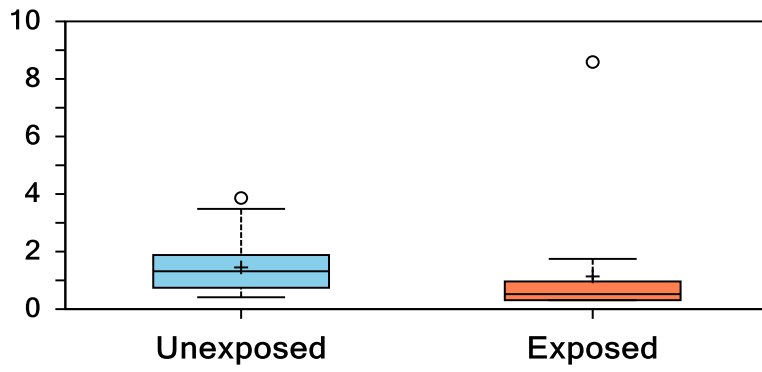

X - 13255

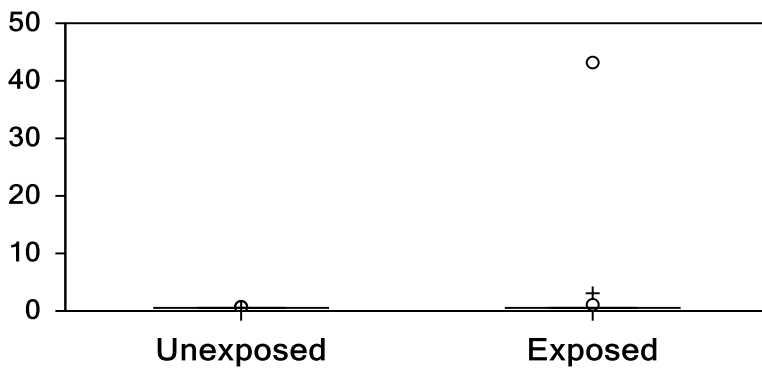

X - 13371

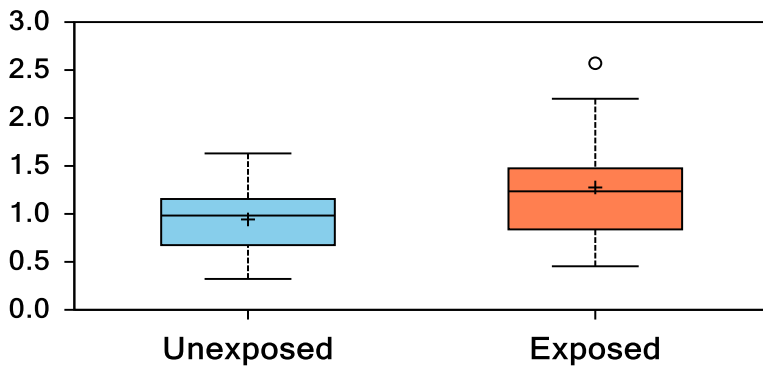

X - 14099

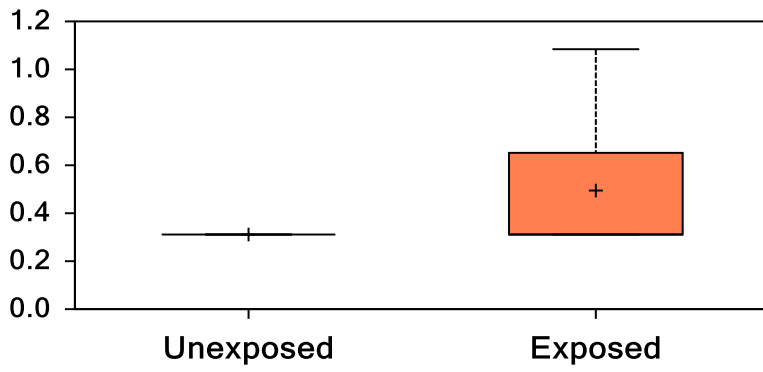

X - 14095

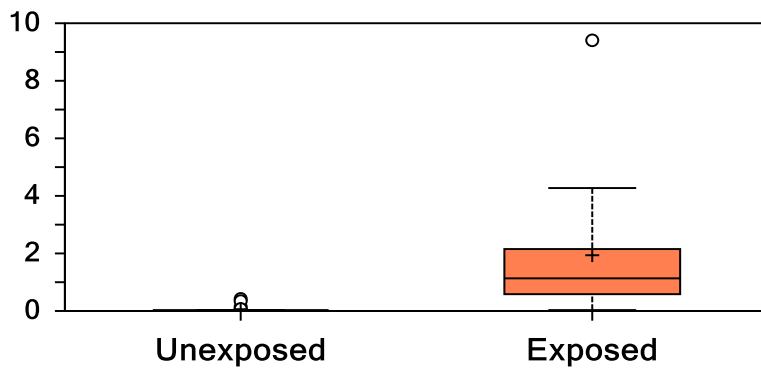

X - 14096

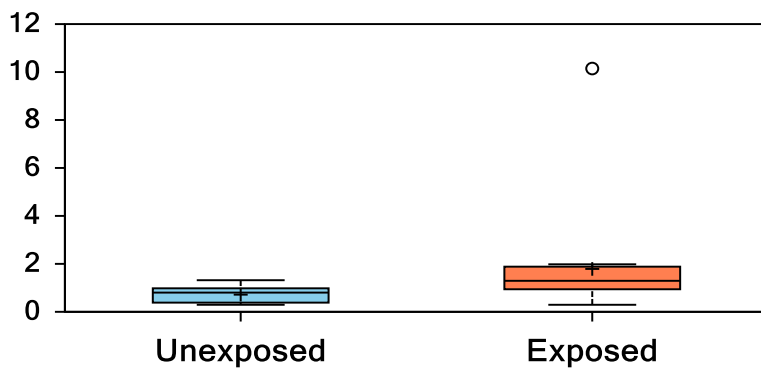

X - 14192

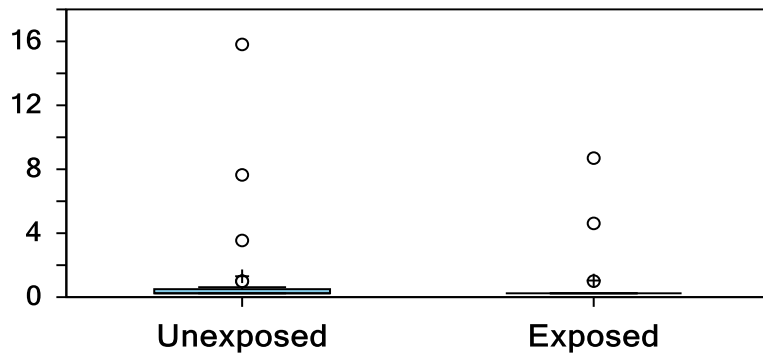

X - 14141

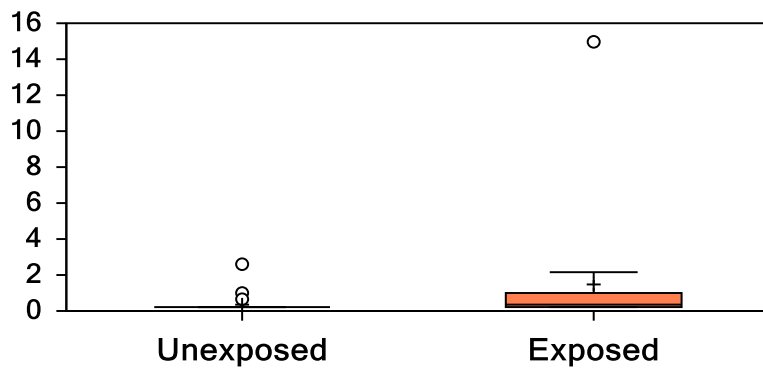

X - 13848

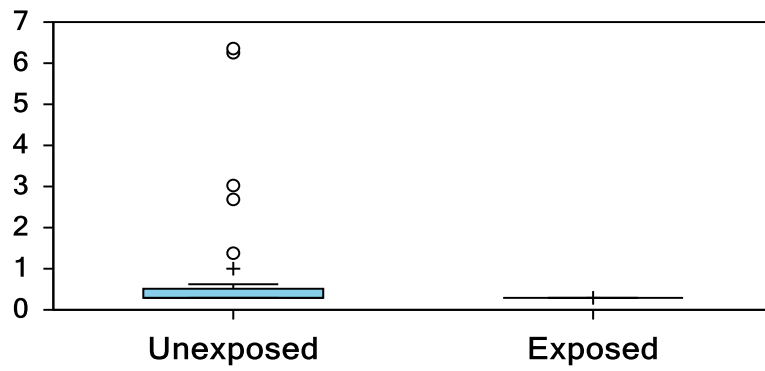

X - 13864

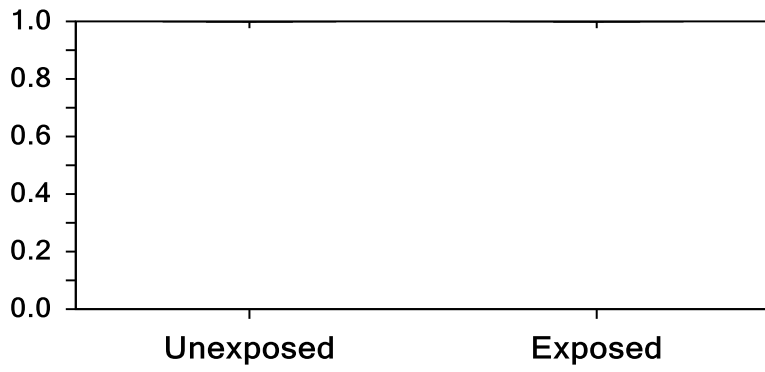

X - 13844

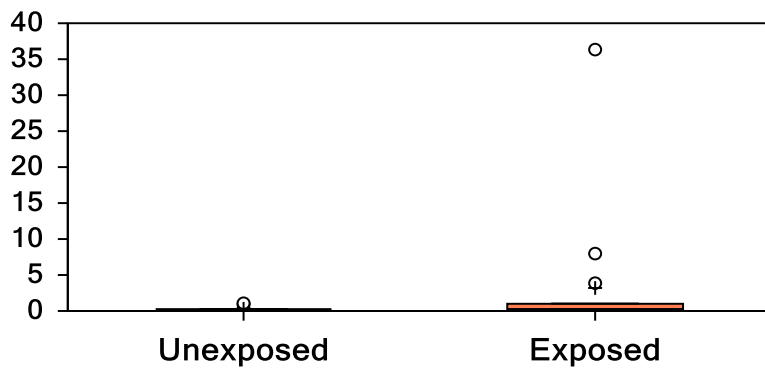

X - 14062

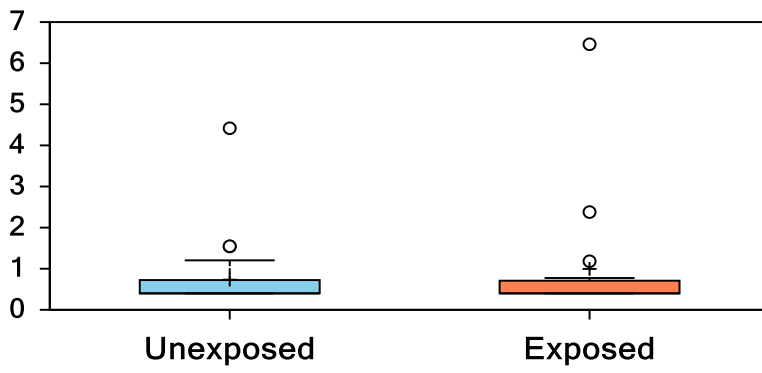

X - 13928

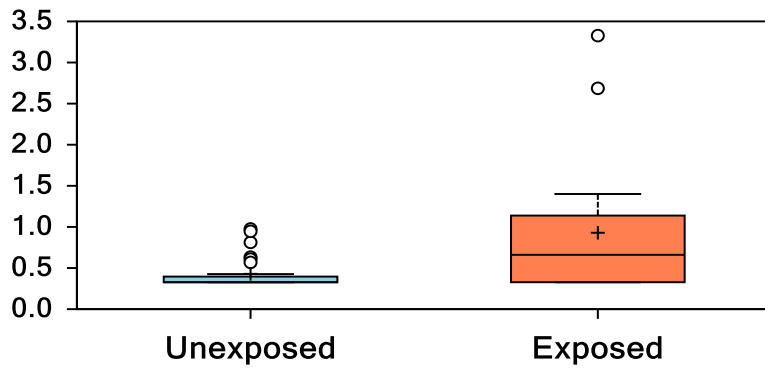

X - 14056

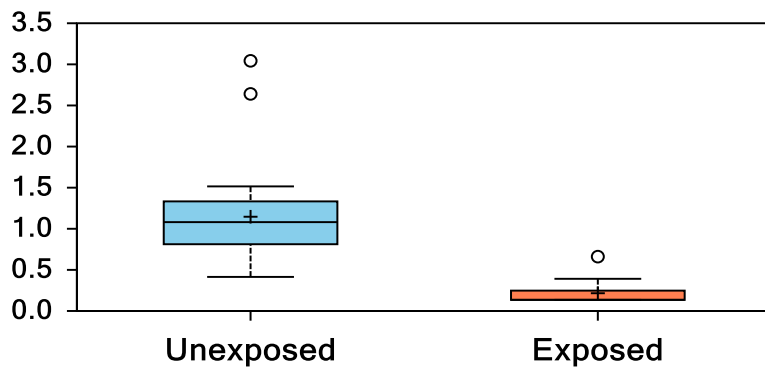

X - 12627

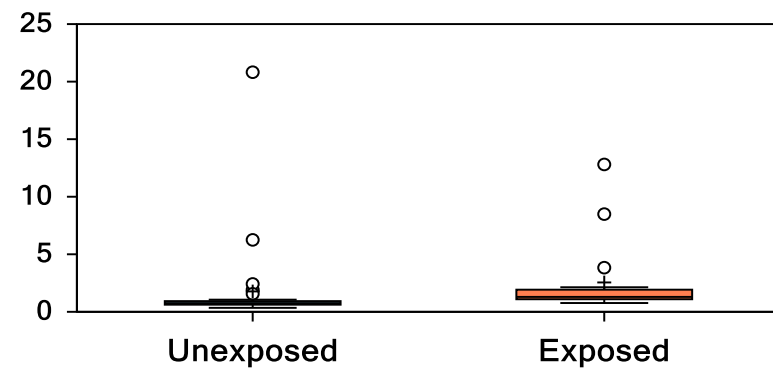

X - 12565

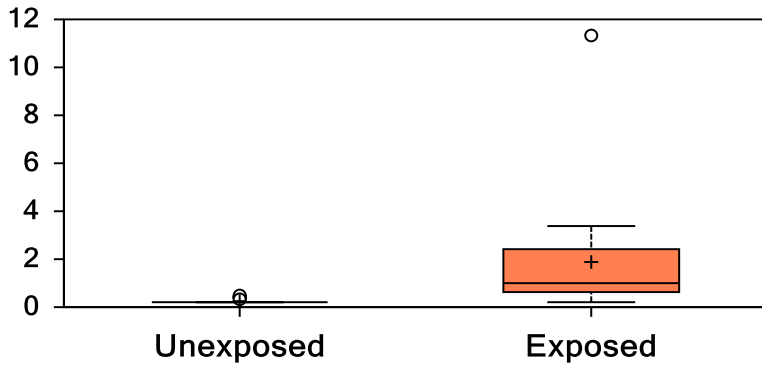

X - 12602

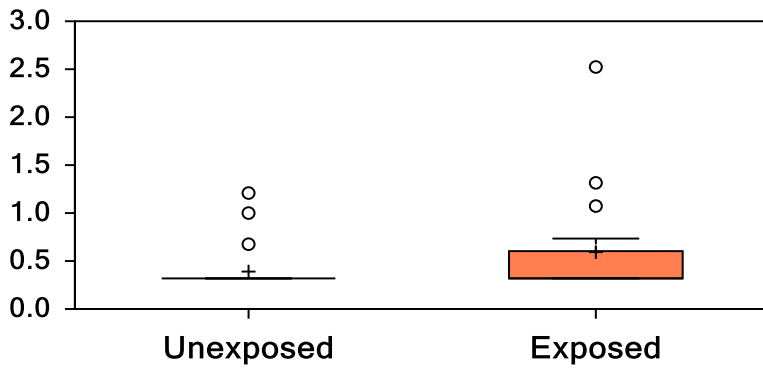

X - 12715

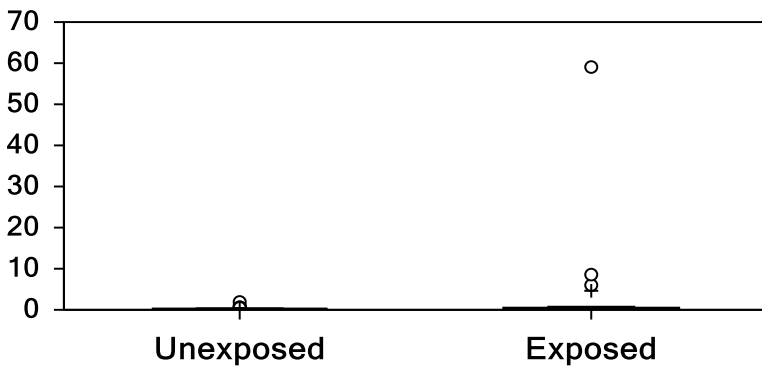



X - 12660

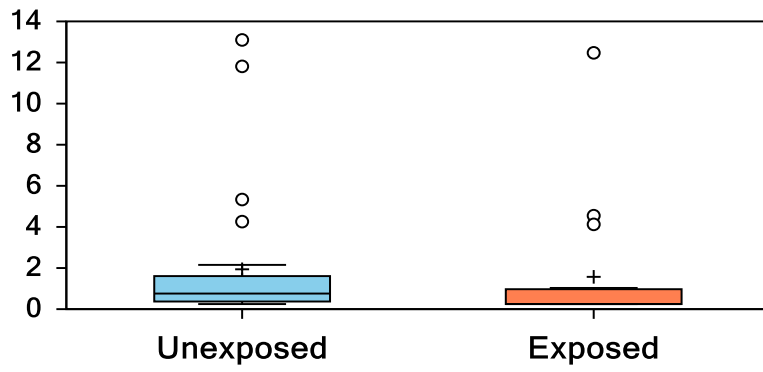

X - 12358

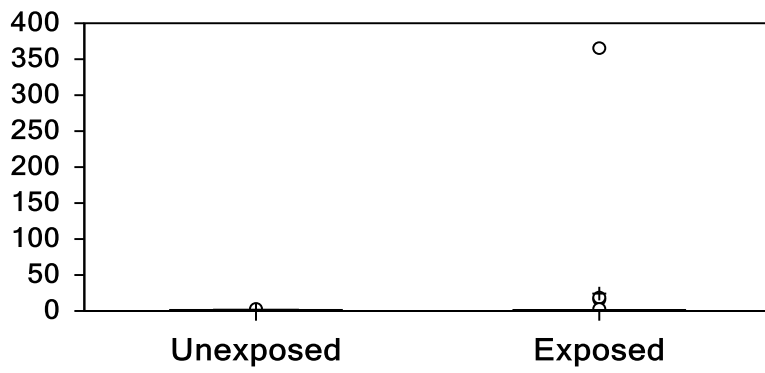

X - 12407

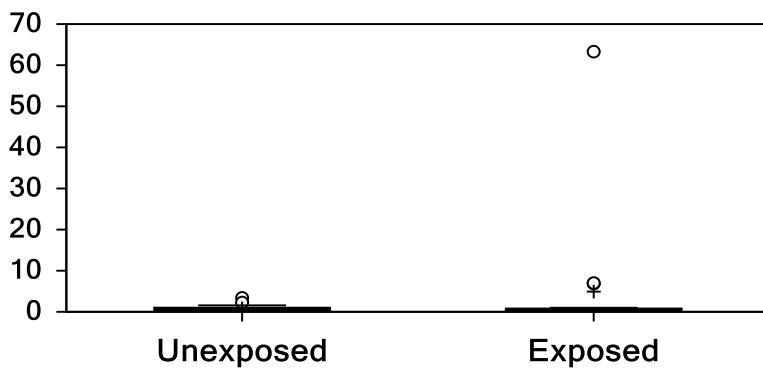

X - 12335

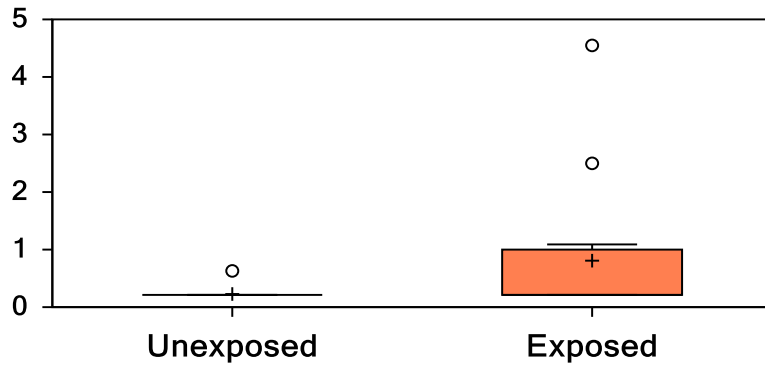

X - 12465

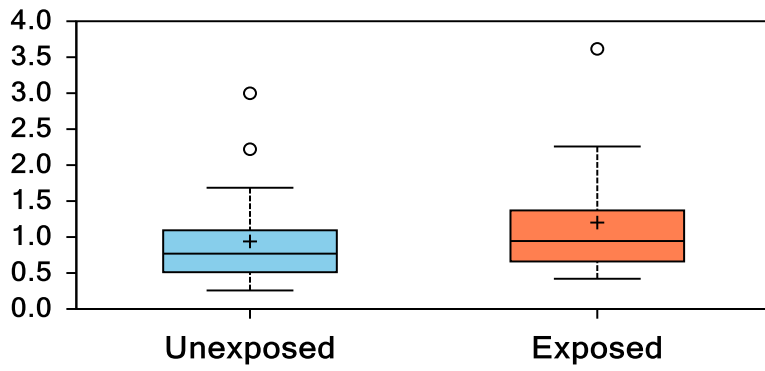

X - 12422

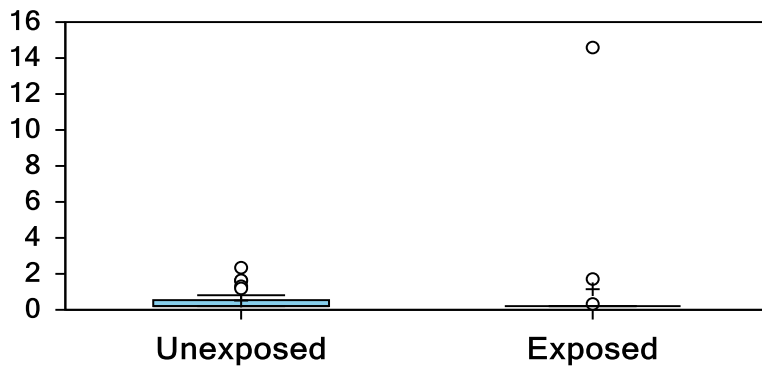

X - 12443

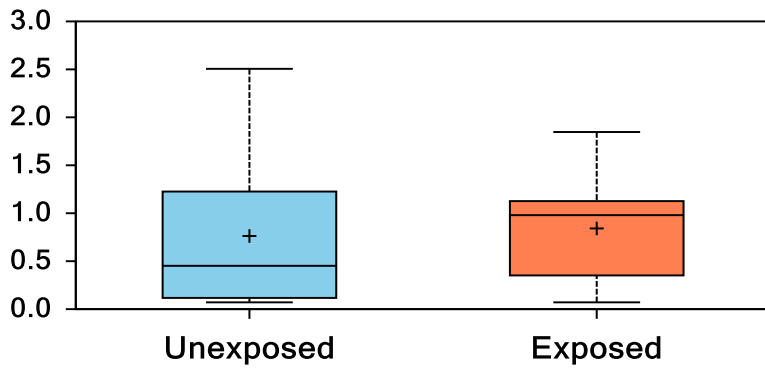

X - 12822

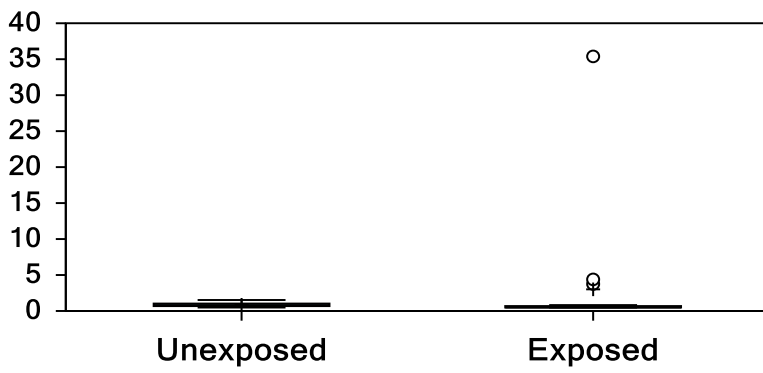

X - 12814

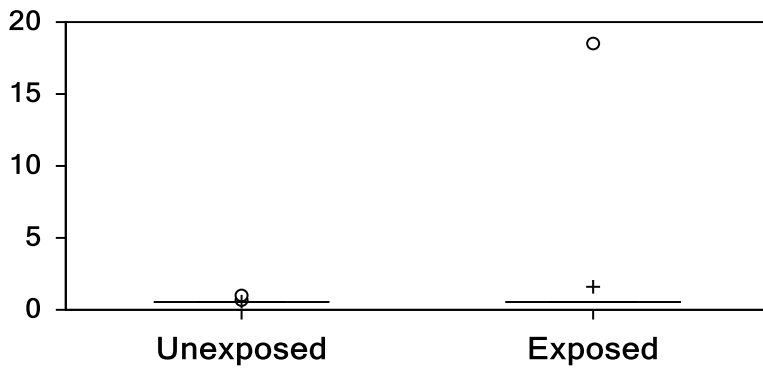

X - 12816

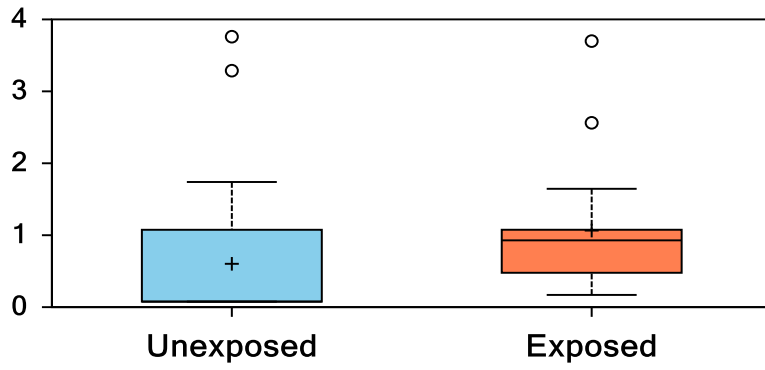

X - 12850

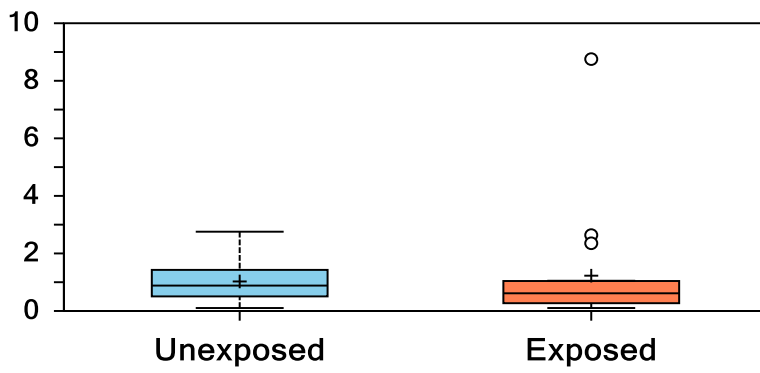

X - 12831

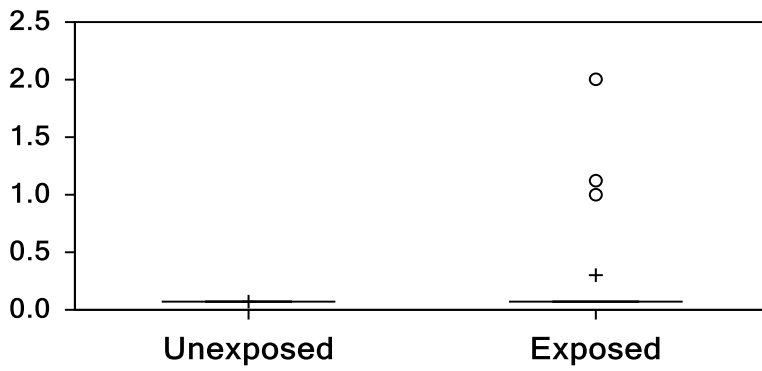

X - 12742

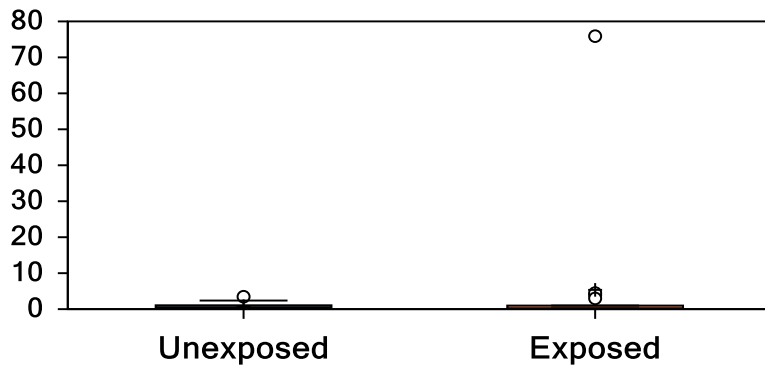

X - 12743

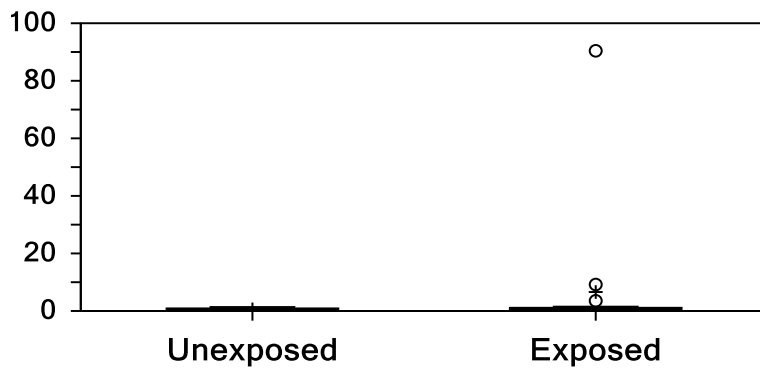

X - 12739

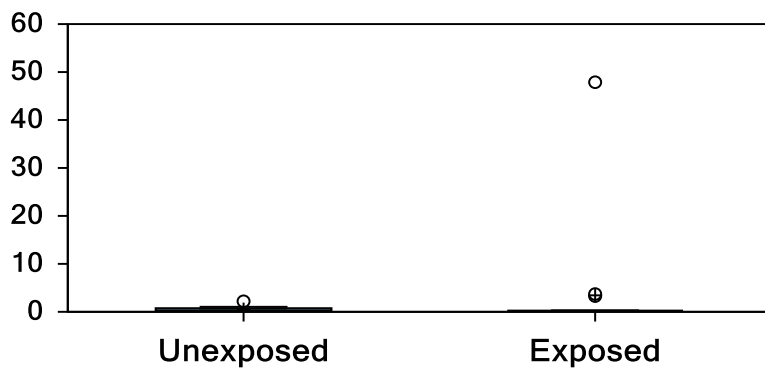

X - 12776

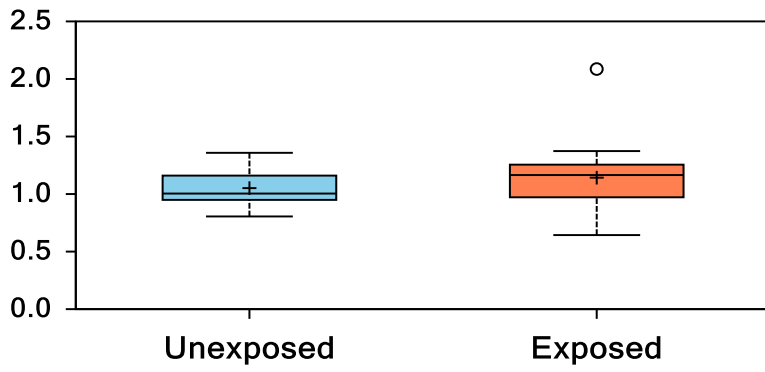

X - 12749

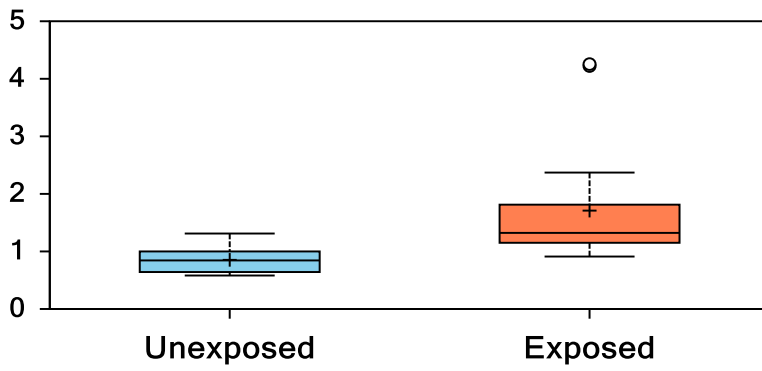

X - 12760

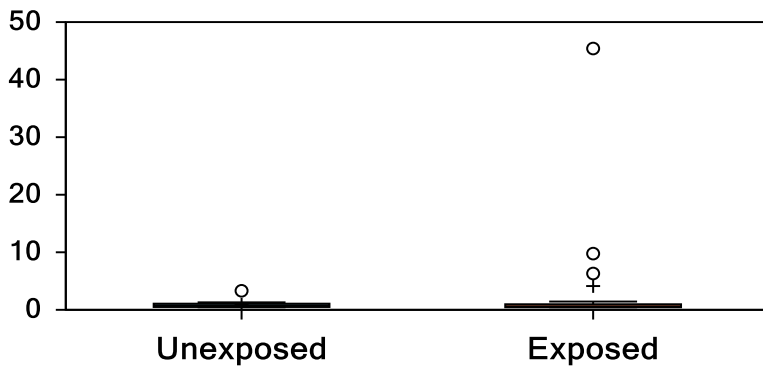

dimethylglycine

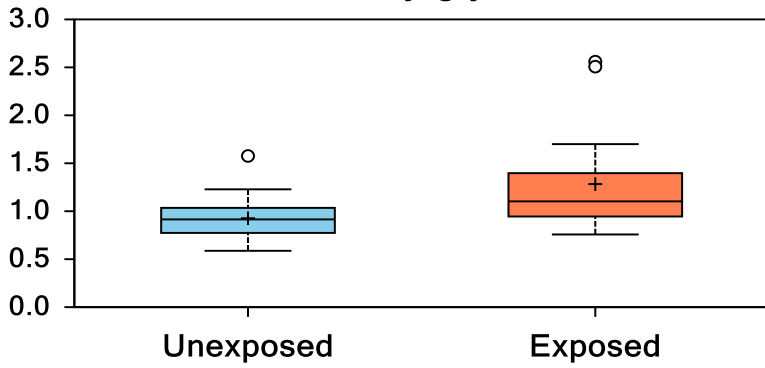

serine

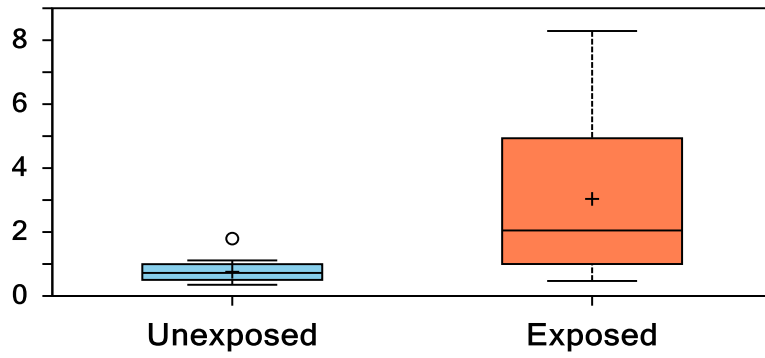

threonine

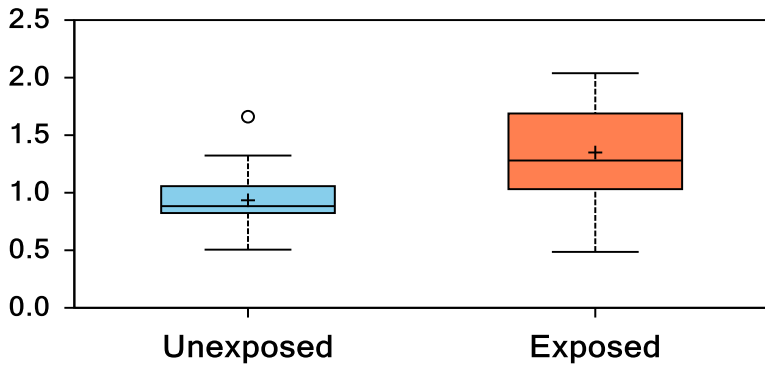

**Box and Whiskers Legend**

- + Mean Value
- Median Value
- Extreme Data Points
- Upper Whisker Upper Quartile
- Lower Whisker Lower Quartile
- Upper Whisker "Max" of distribution
- Lower Whisker "Min" of distribution
- Unexposed
- Exposed

aspartate

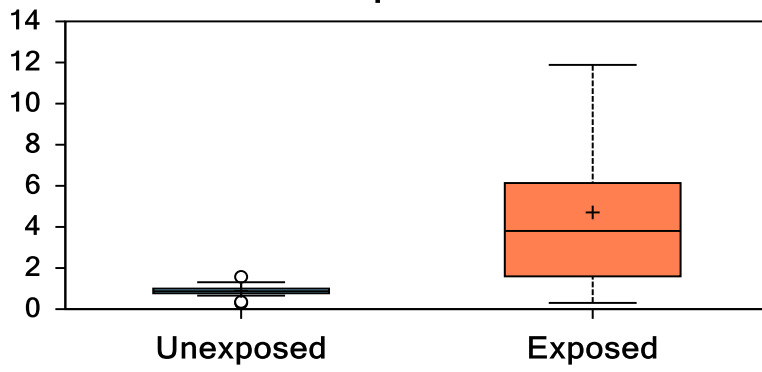

beta-alanine

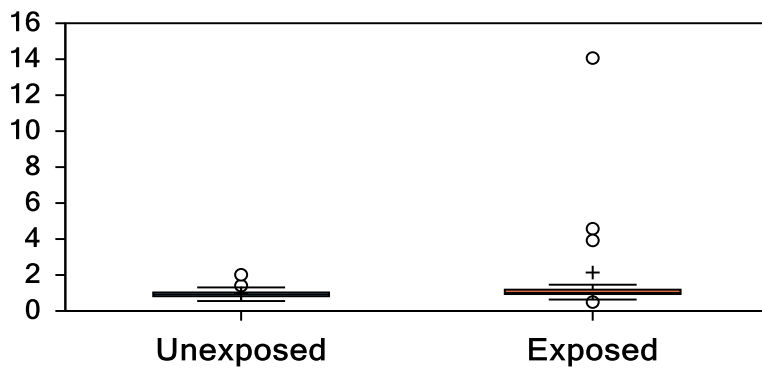

alanine

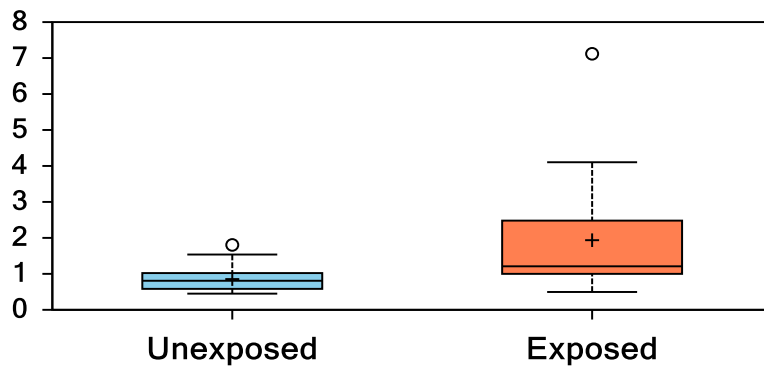



### glutamate

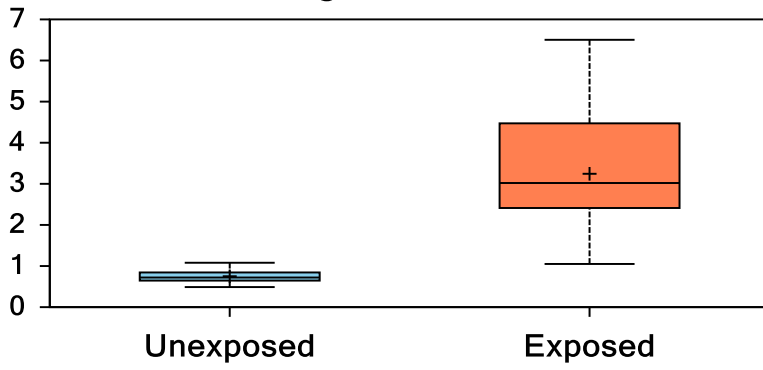

### pyroglutamine\*

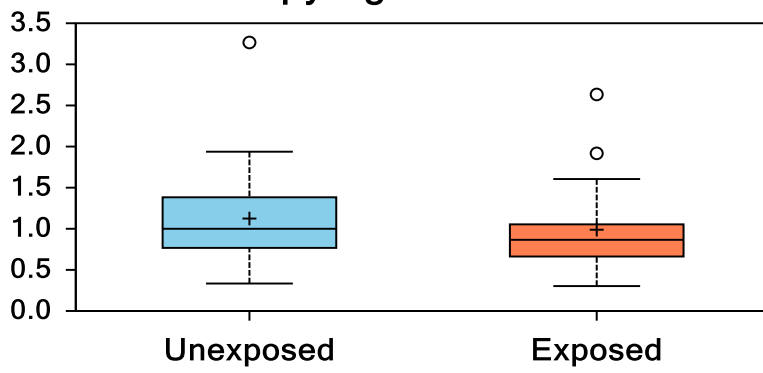

### N-acetylglutamine

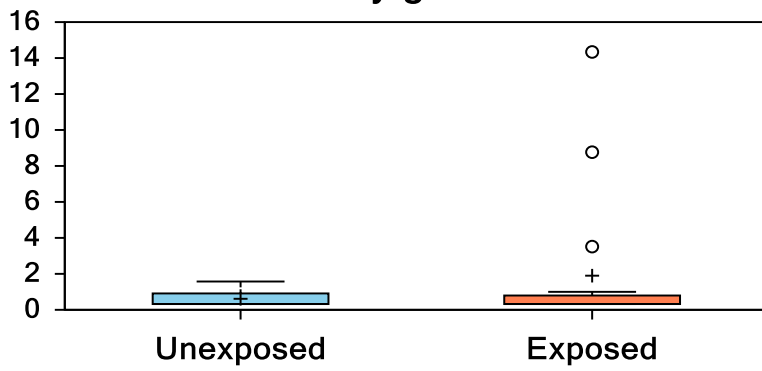

### 3-methylhistidine

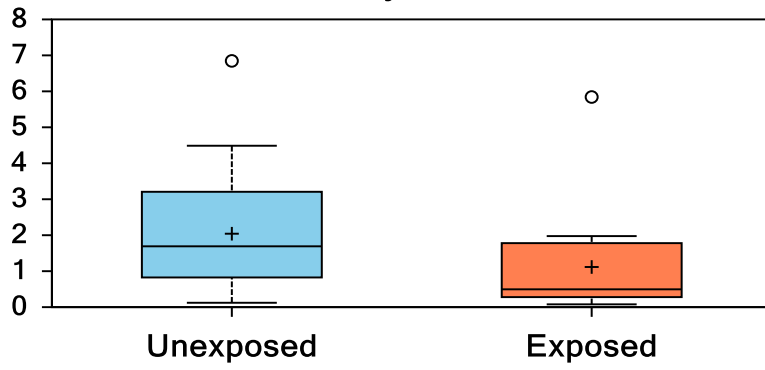

### 1-methylimidazoleacetate

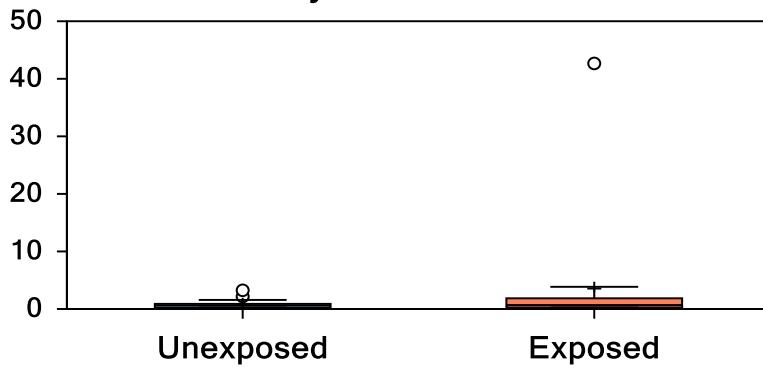

### cis-urocanate

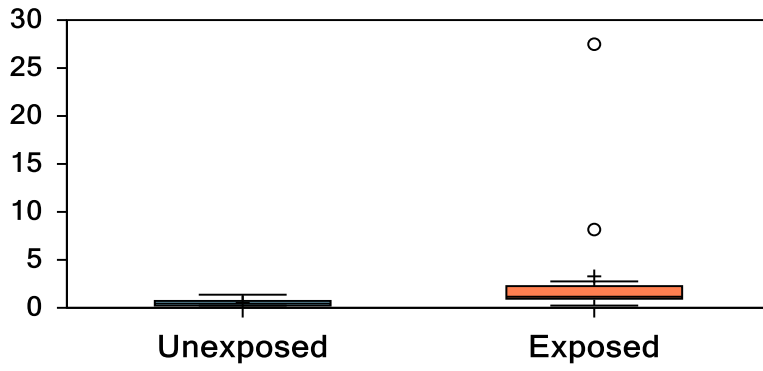

### lysine

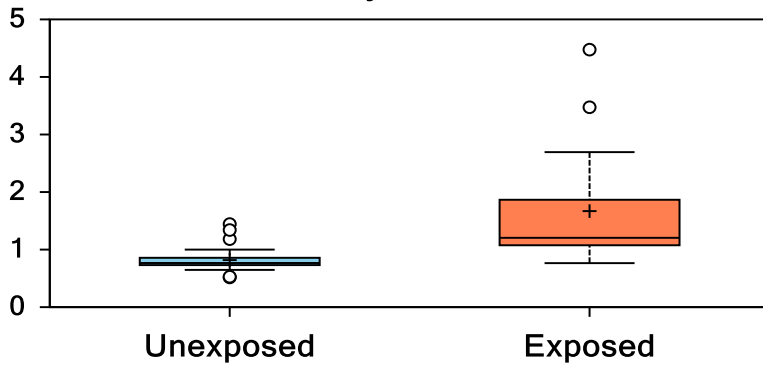

### N-6-trimethyllysine

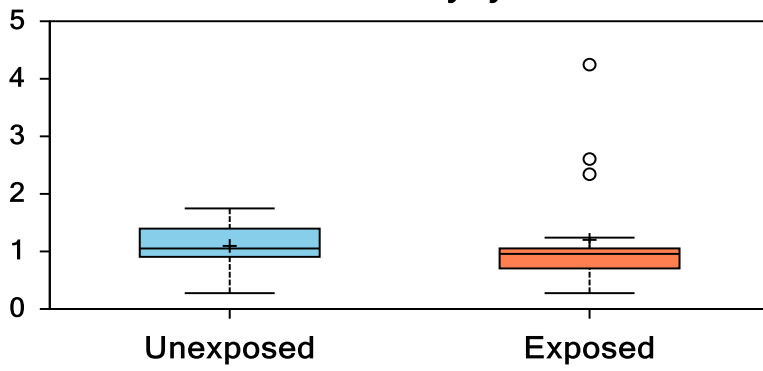

### glutaroyl carnitine

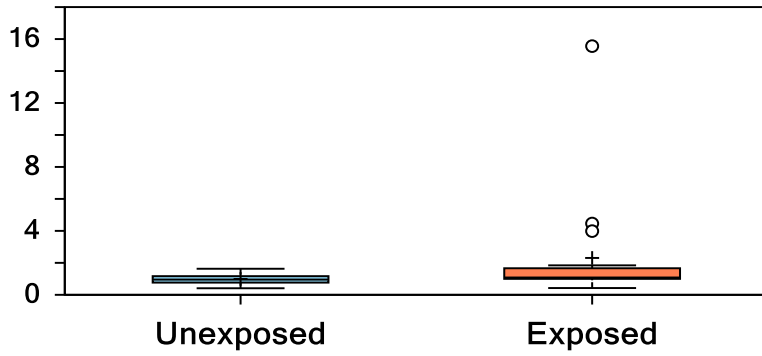

### methamphetamine (isobar with 1-phenylethanolamine)

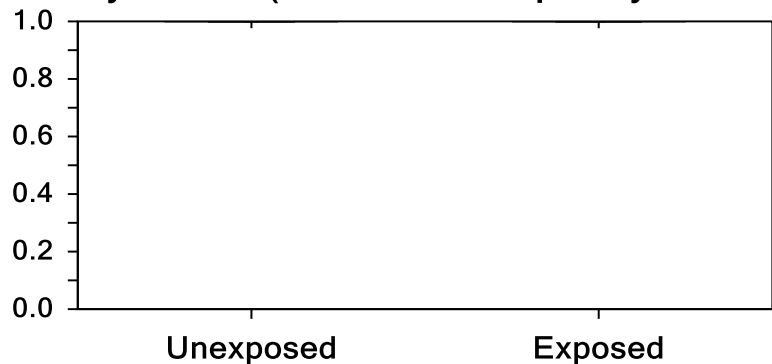

### o-cresol sulfate

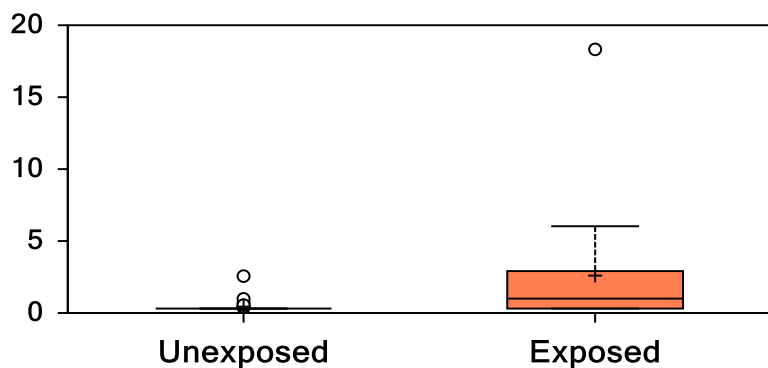

### tyrosine

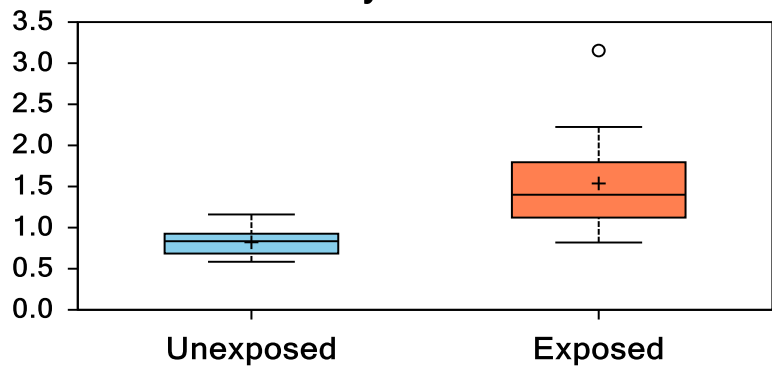

### tyramine

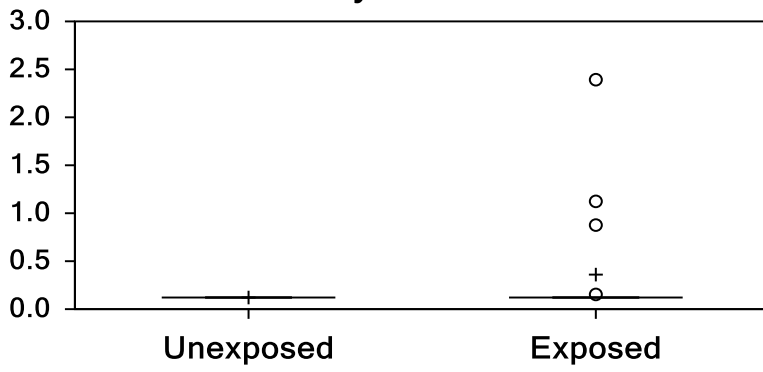

### 4-hydroxyphenylacetate

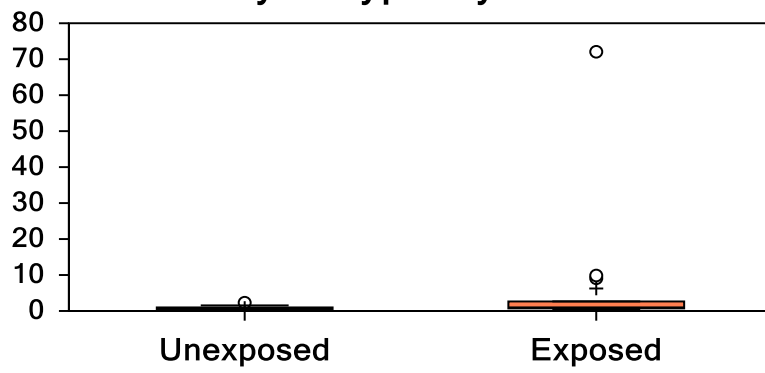

### phenylacetylglutamine

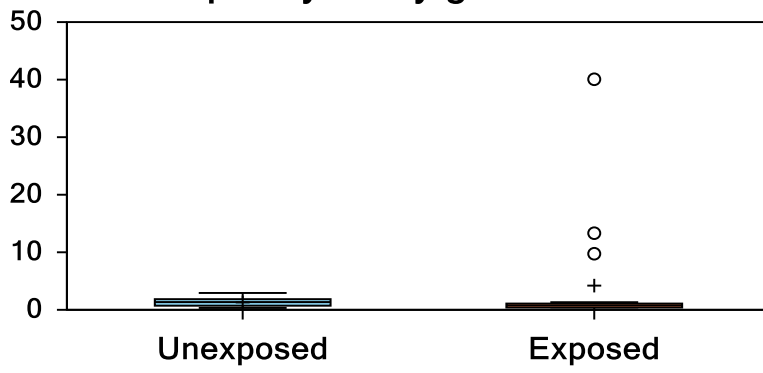

### phenol sulfate

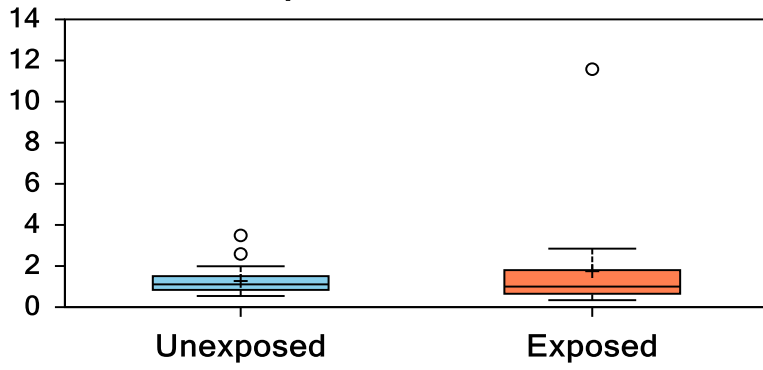

### kynurenine

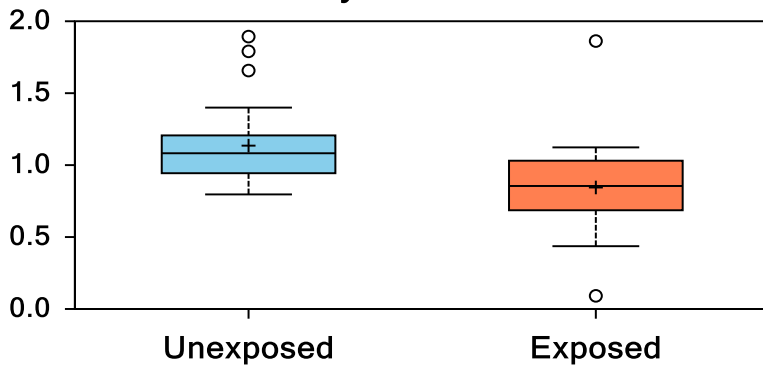

### indolepyruvate

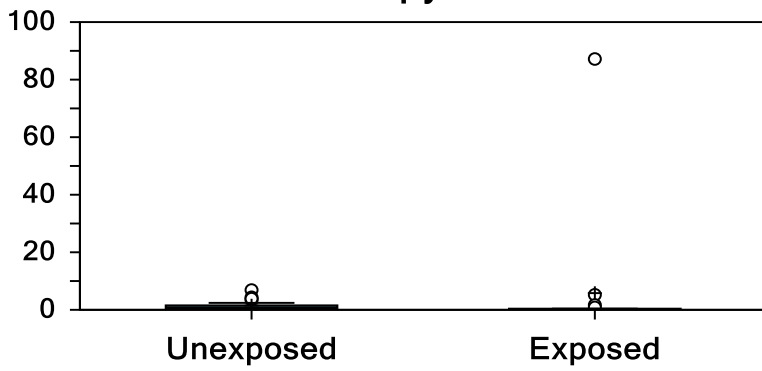

tryptophan betaine

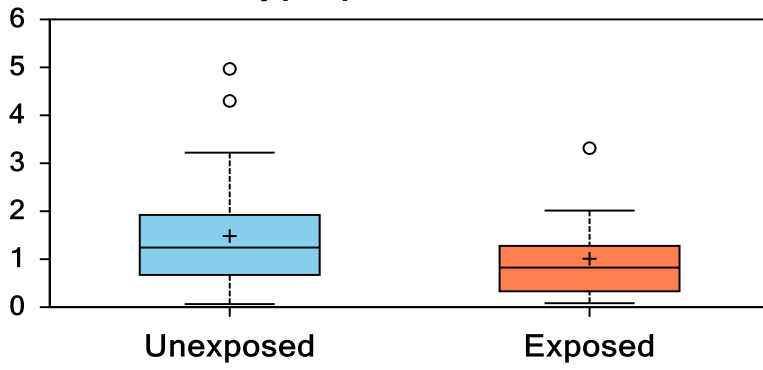

tryptamine

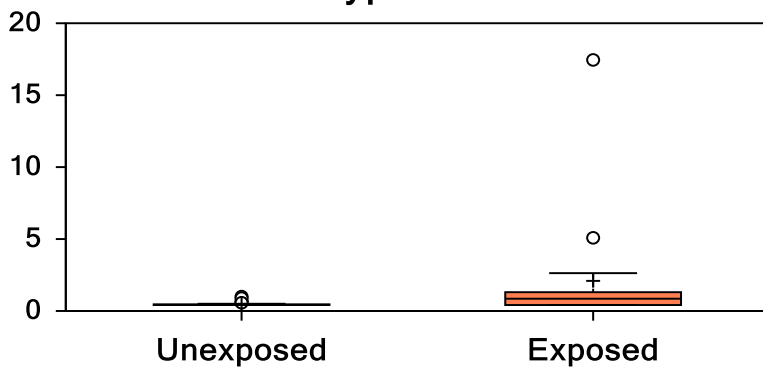

C-glycosyltryptophan\*

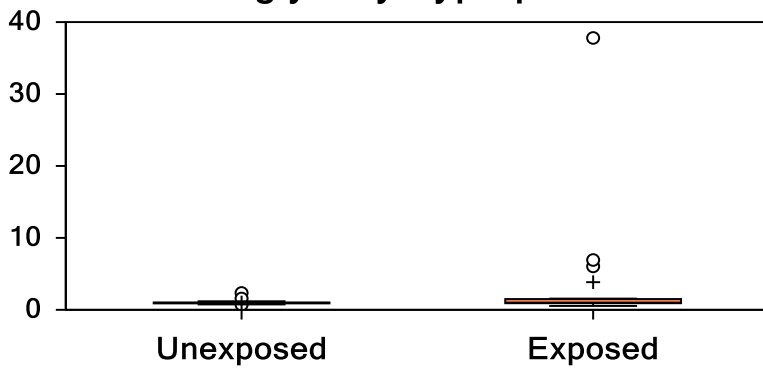

### indolepropionate

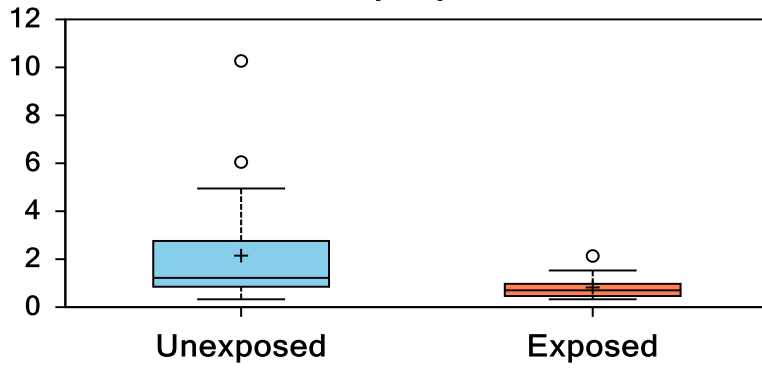

### levulinate (4-oxovalerate)

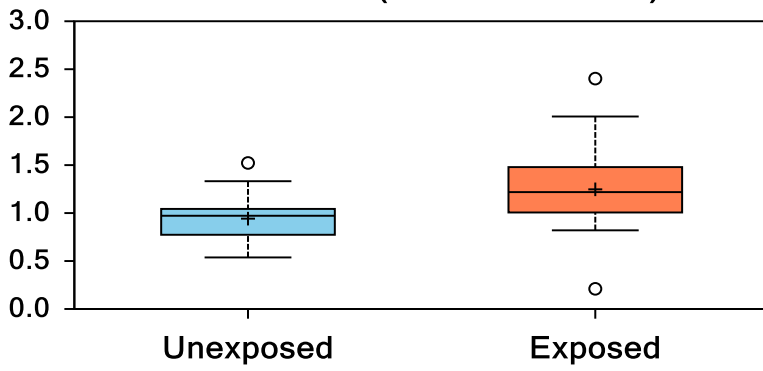

### isoleucine

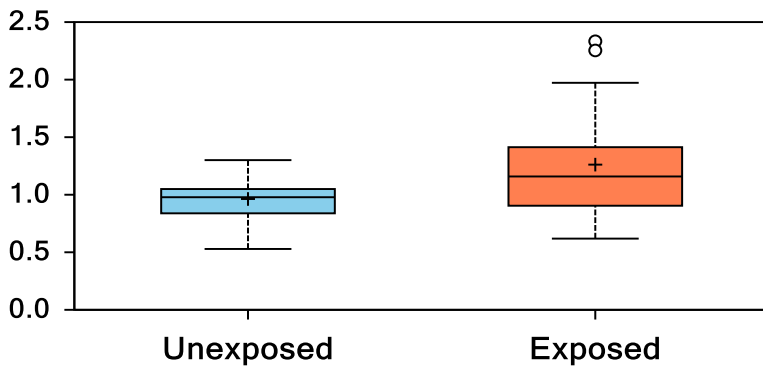



### N-acetylvaline

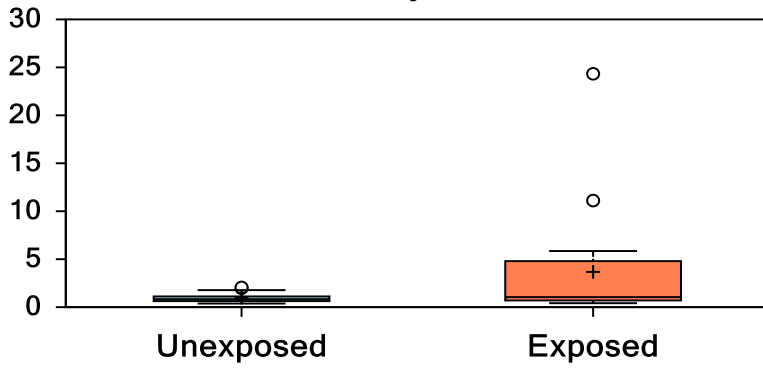

### valine

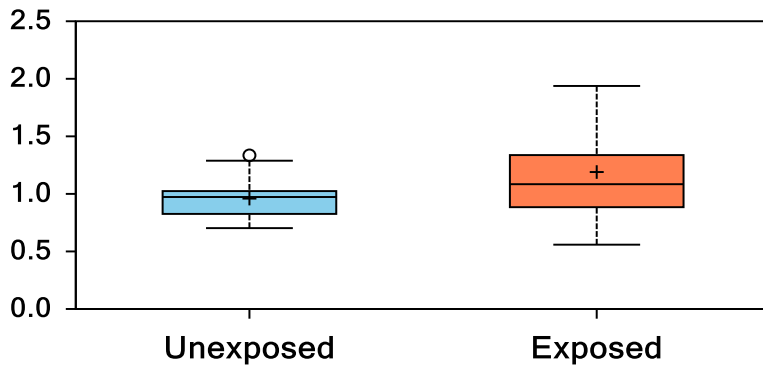

### 4-methyl-2-oxopentanoate

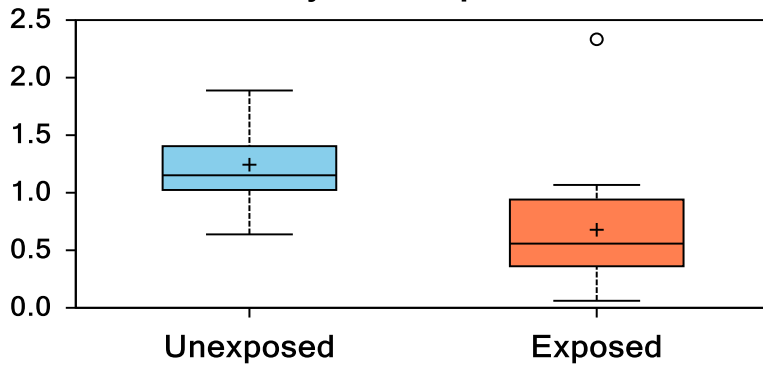

### isovalerylglycine

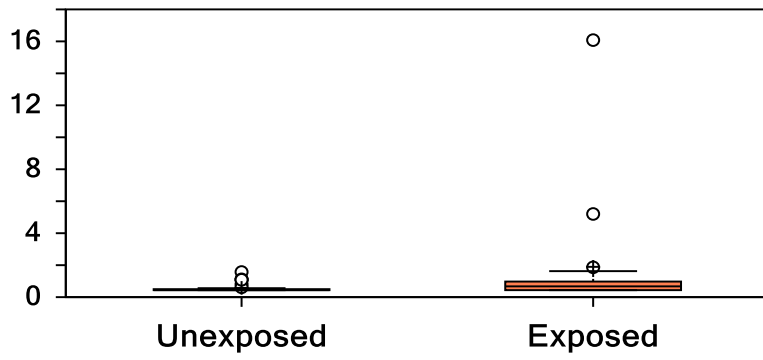

### 2-methylbutyrylcarnitine

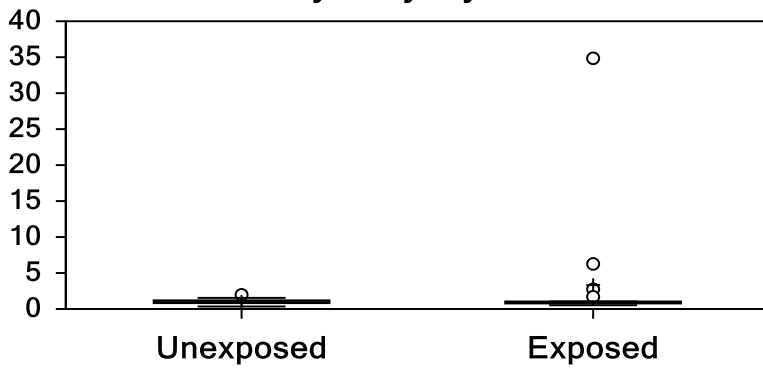

### tiglyl carnitine

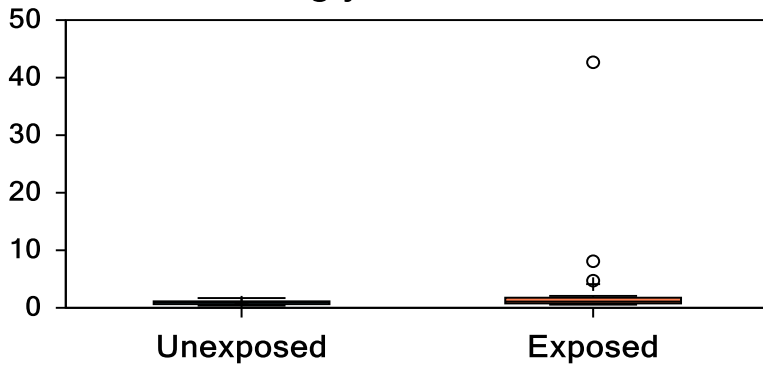

### cysteine

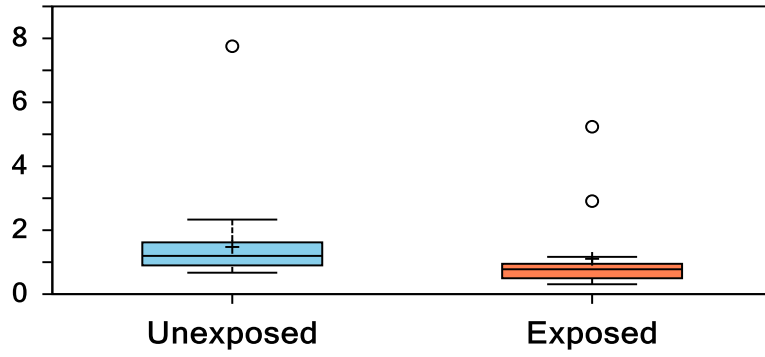

### methionine sulfoxide

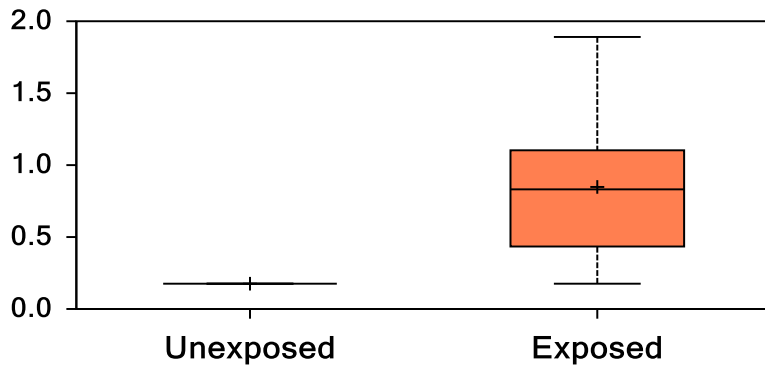

### N-acetylmethionine

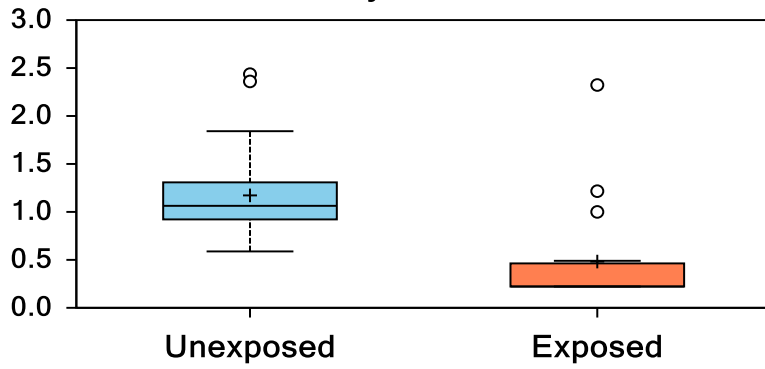

### homocysteine

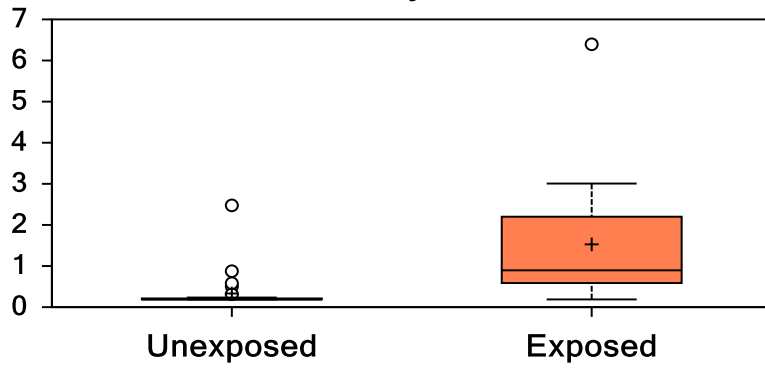

### 4-methylthio-2-oxobutanoate

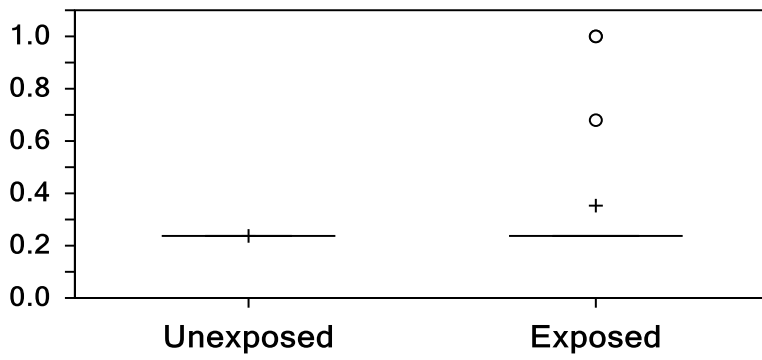

### ornithine

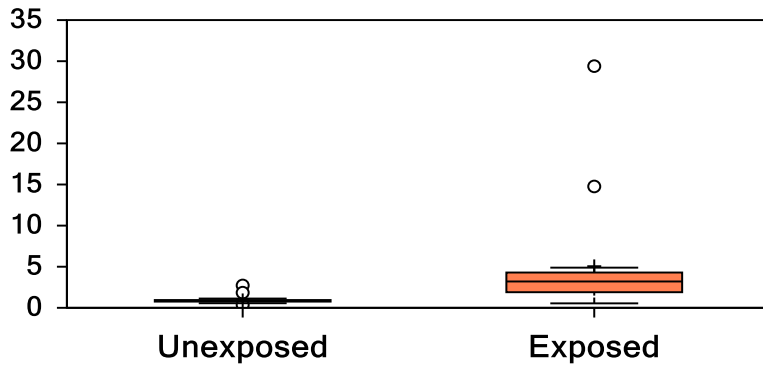

### 5-aminovalerate

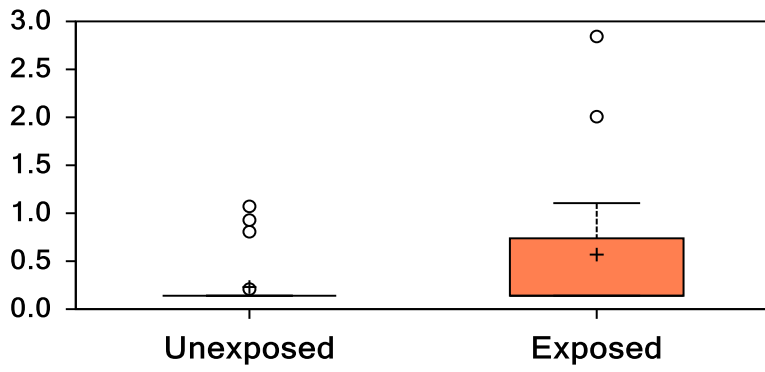

### N-methyl proline

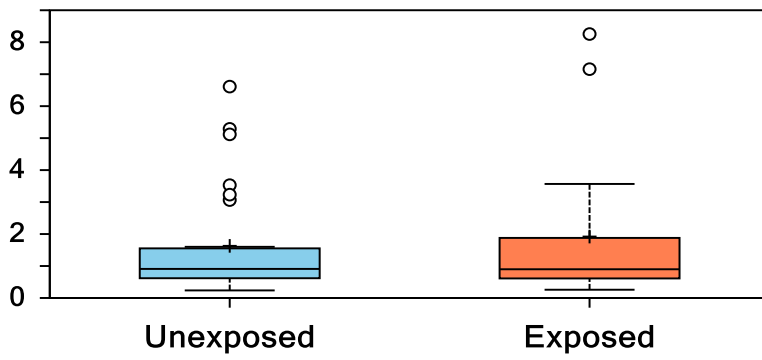

### creatinine

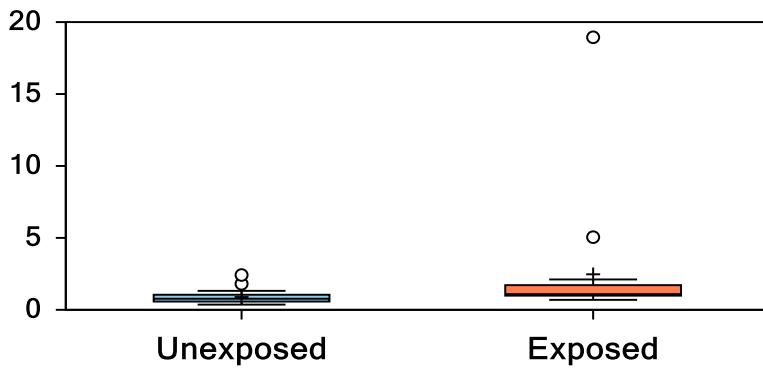

### 5-methylthioadenosine (MTA)

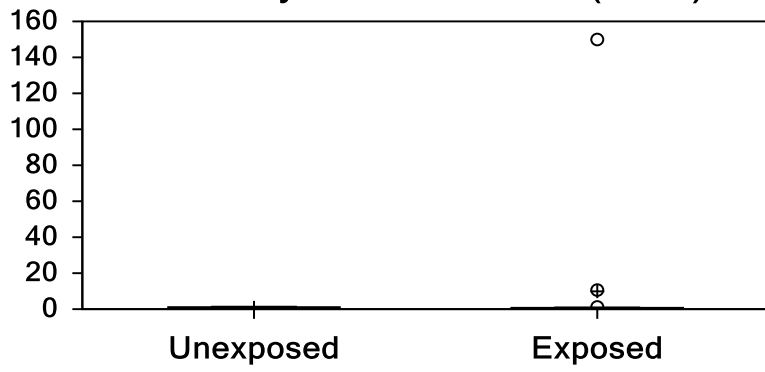

### 4-acetamidobutanoate

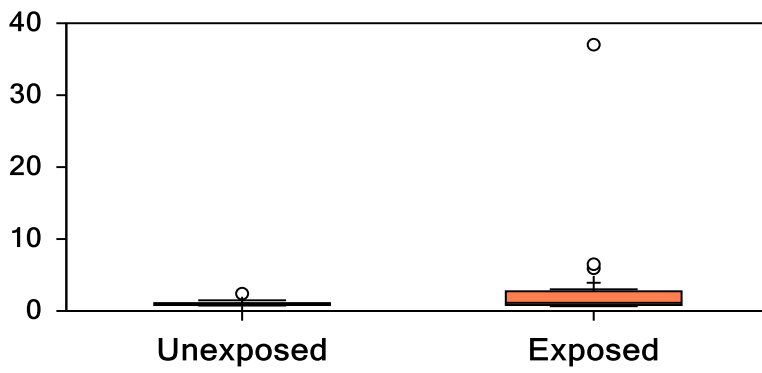

### glycylvaline

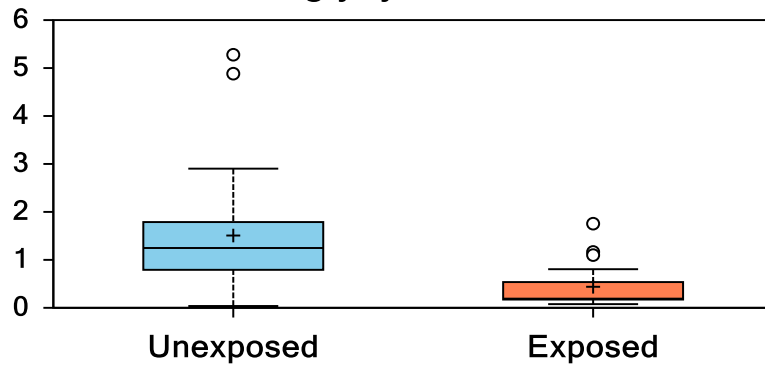

### glycylphenylalanine

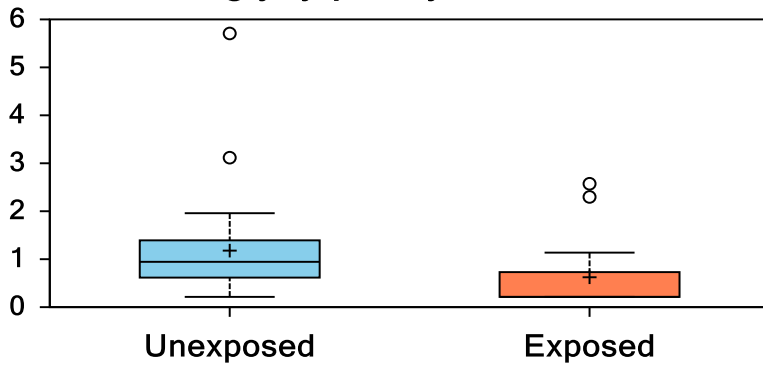

### alanylalanine

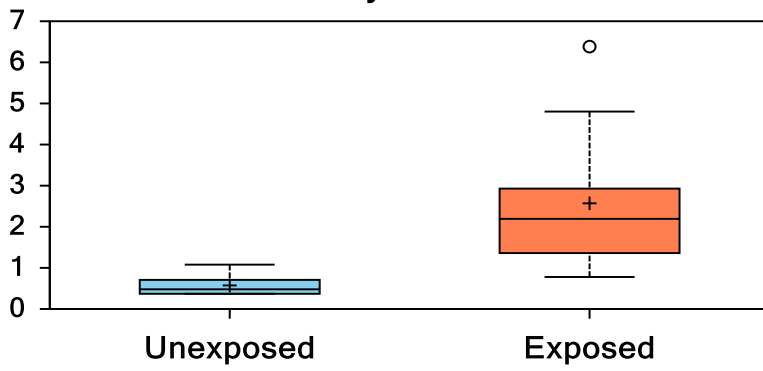

### aspartylphenylalanine

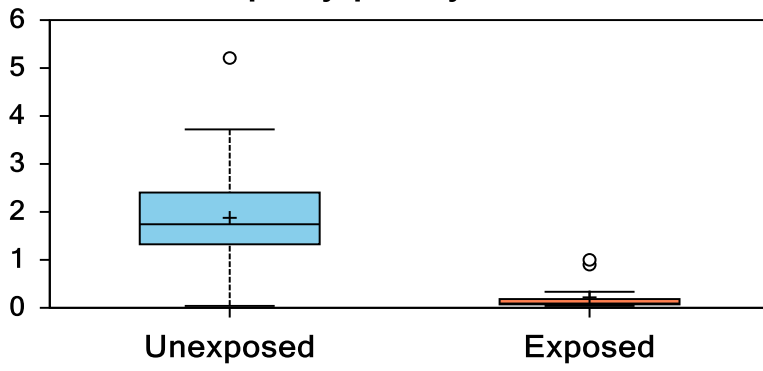

### prolylglycine

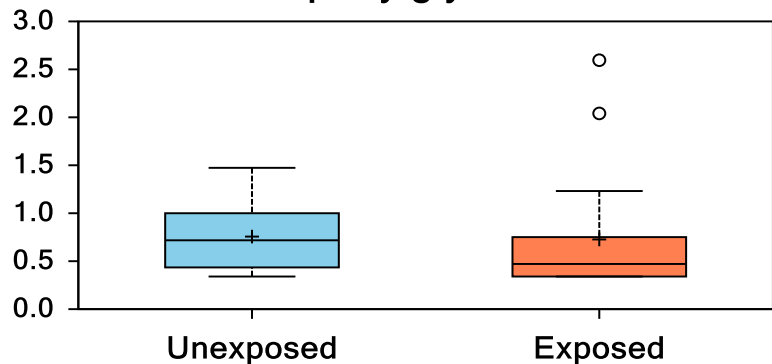

### isoleucylhistidine

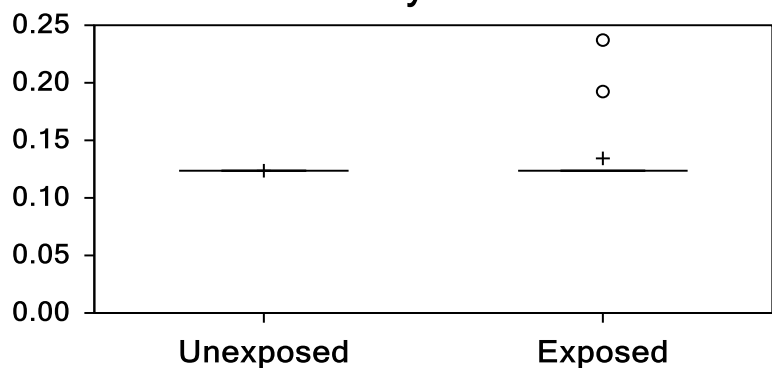

### Isobar: leucylisoleucine, isoleucylleucine

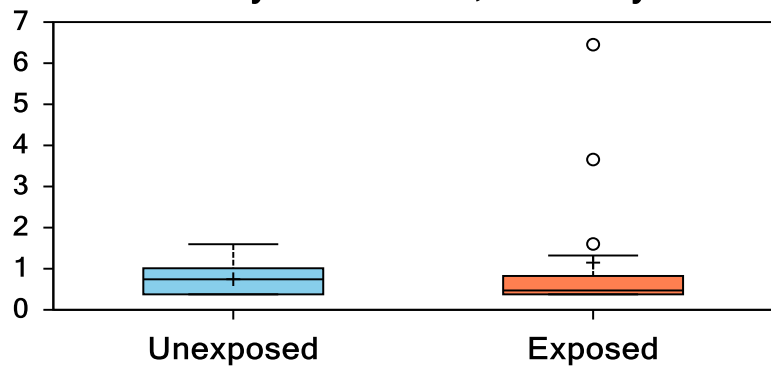



phenylalanylphenylalanine

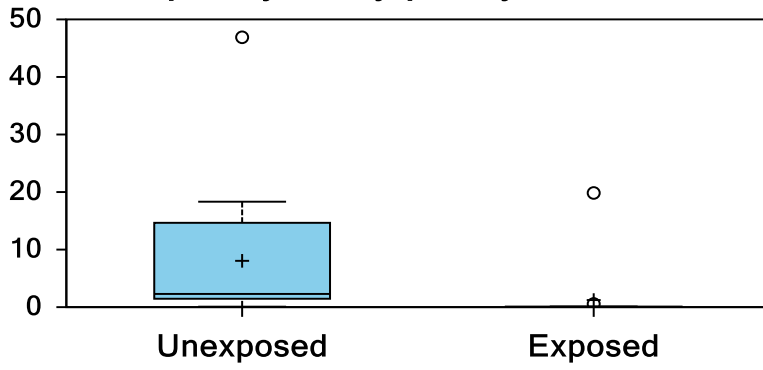

pyroglutamyvaline

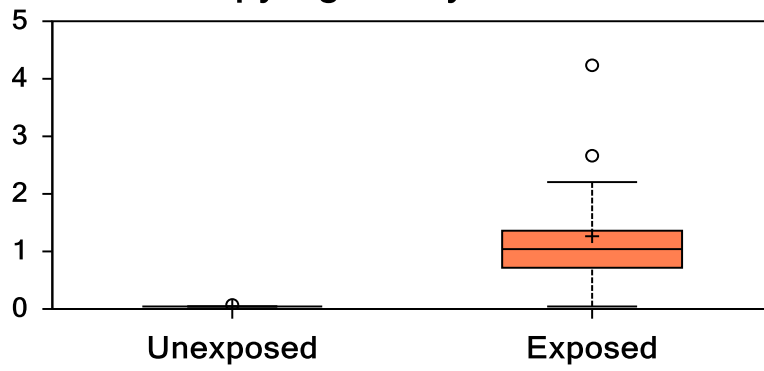

valylmethionine

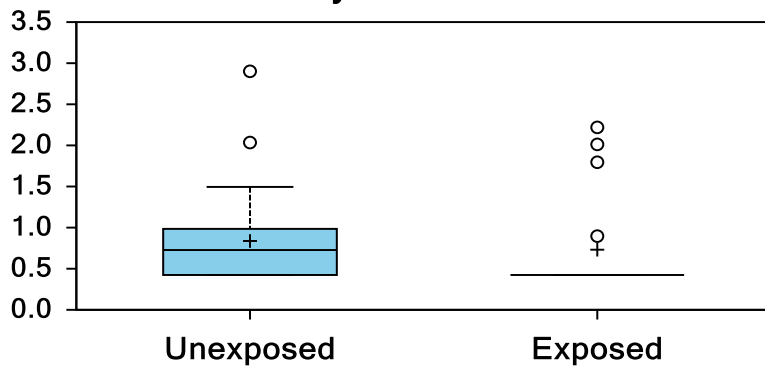

valylvaline

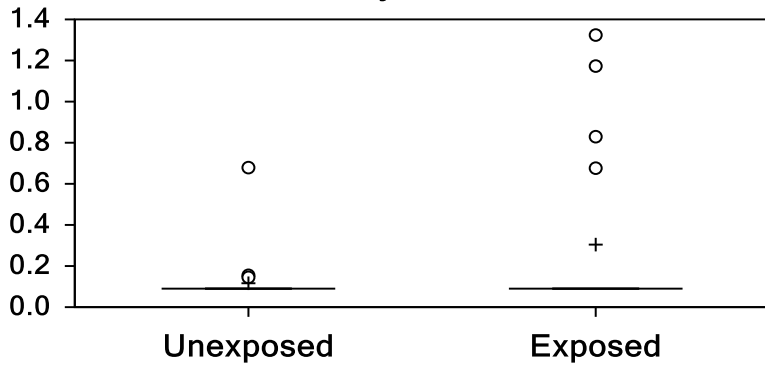

cyclo(glu-glu)

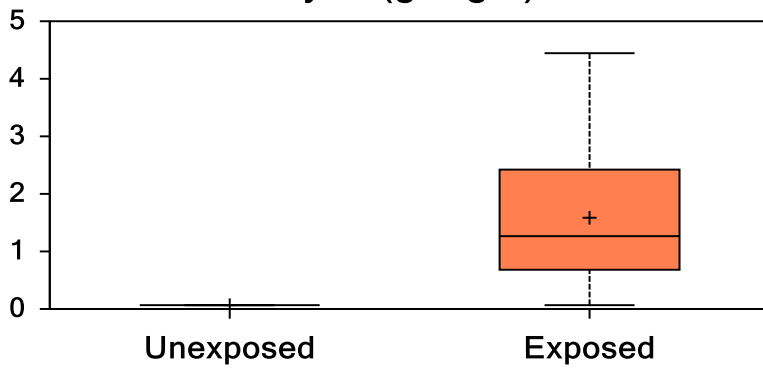

aspartylleucine

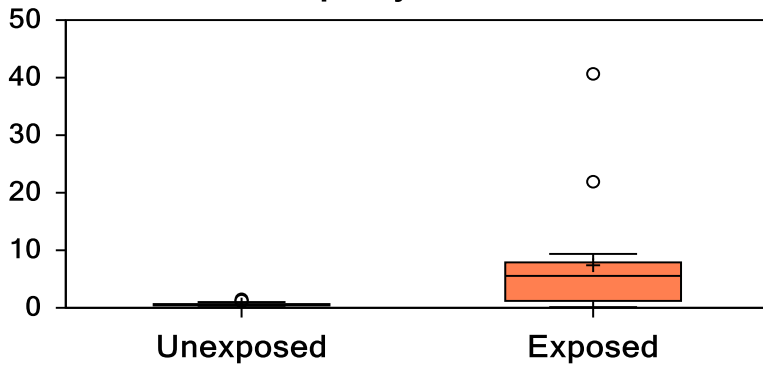

### methionylalanine

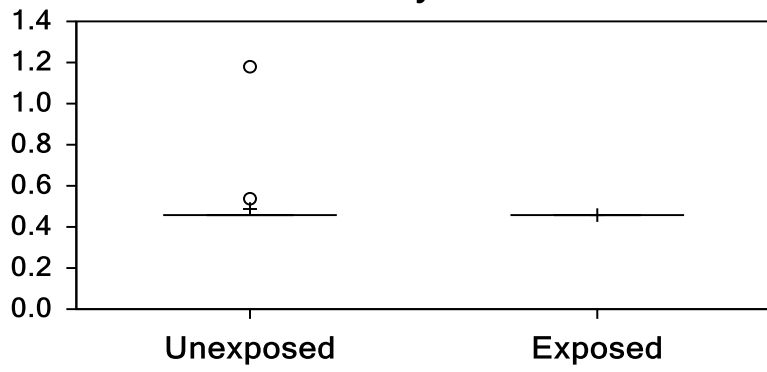

### isoleucylglutamine

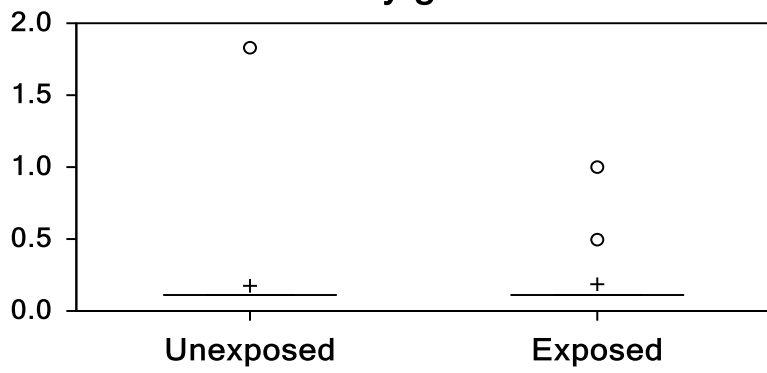

### isoleucylphenylalanine

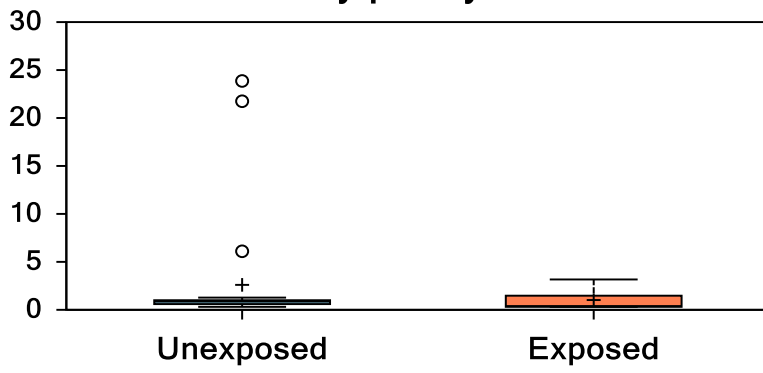

### leucylalanine

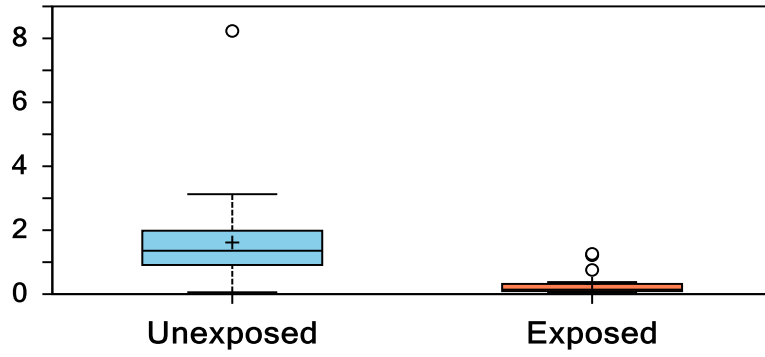

### leucylaspartate

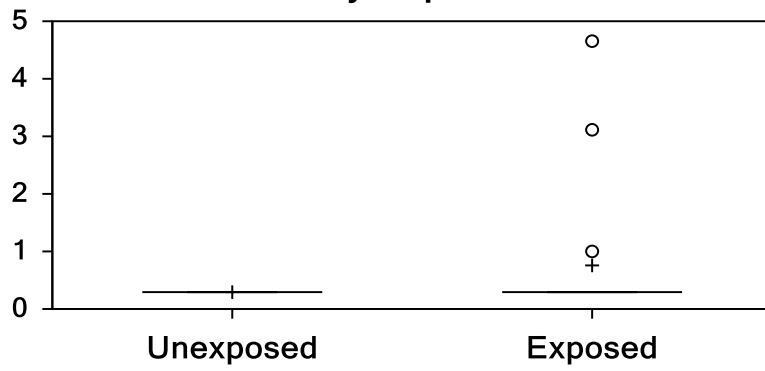

### leucylphenylalanine

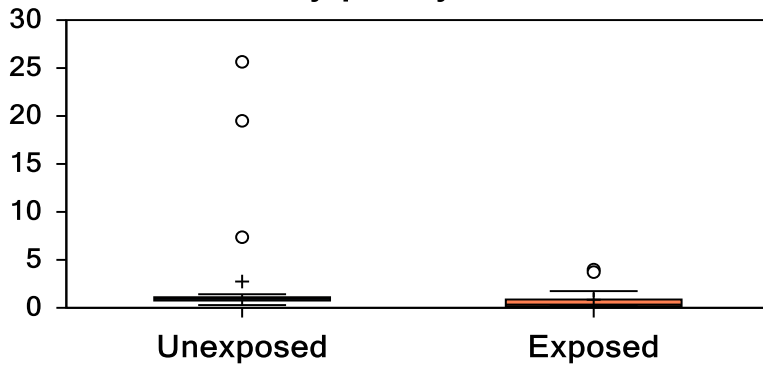

### leucyltyrosine

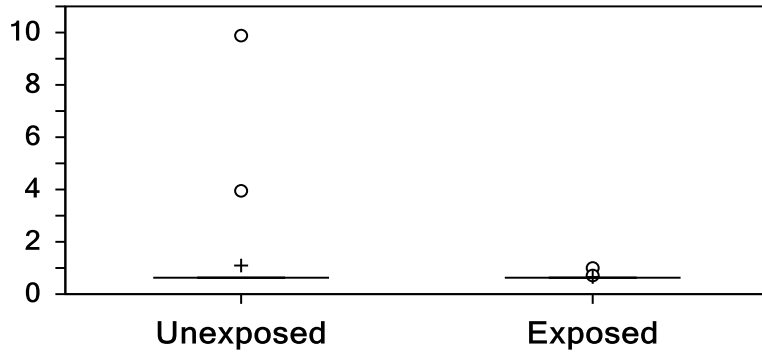

### phenylalanylisoleucine

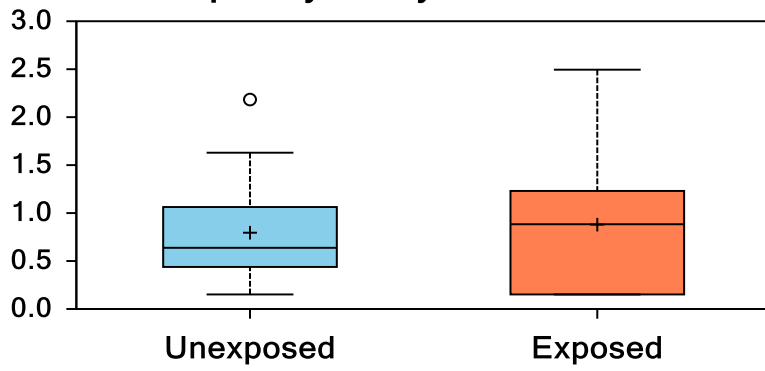

### serylphenyalanine

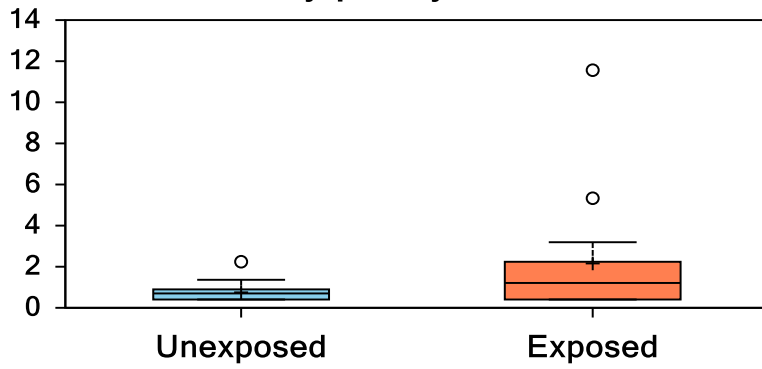

### tyrosylalanine

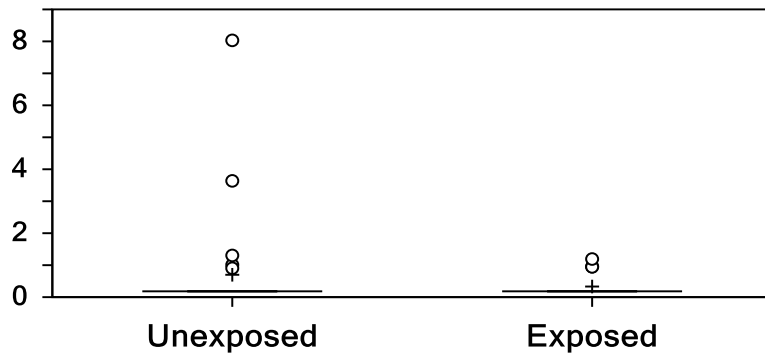

### valylaspartate

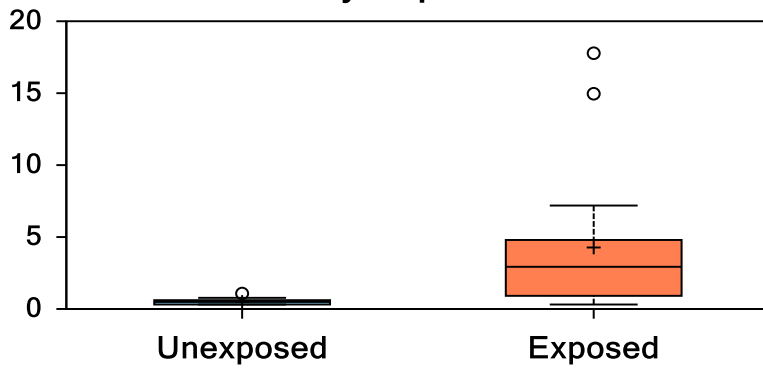

### valylglycine

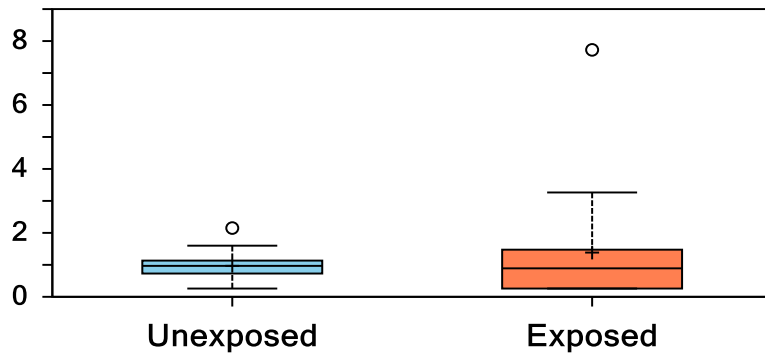

### valylhistidine

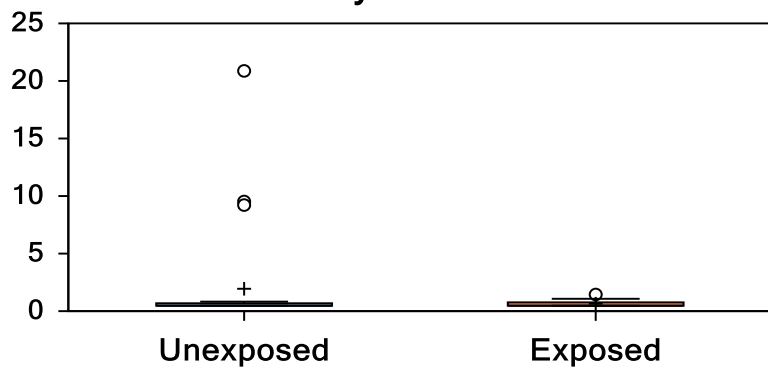

### gamma-glutamylleucine

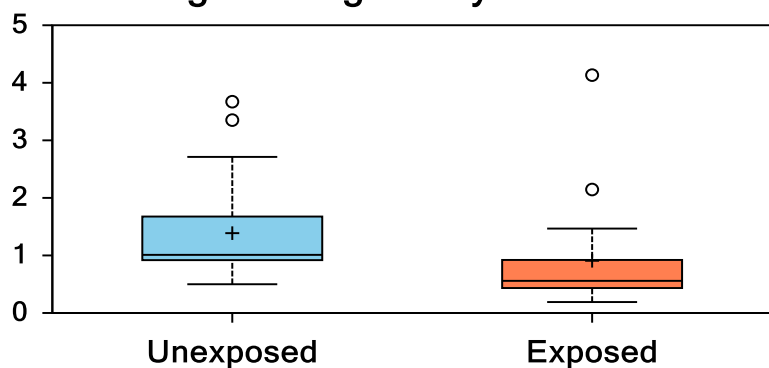

### gamma-glutamylglutamate

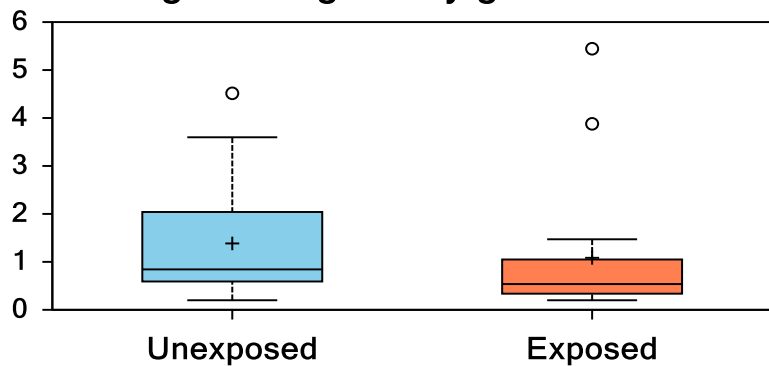

**gamma-glutamyltyrosine**

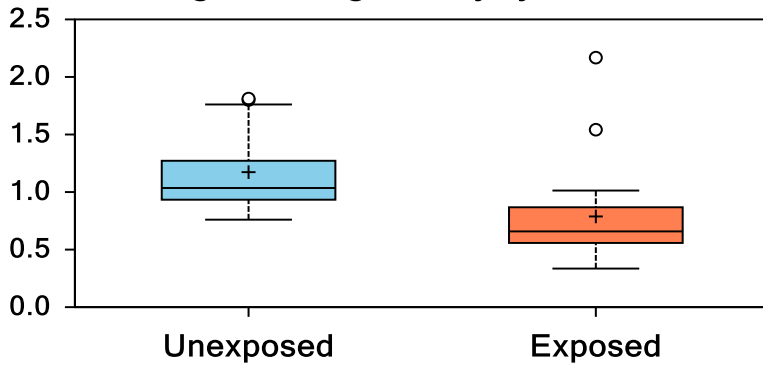

**gamma-glutamylalanine**

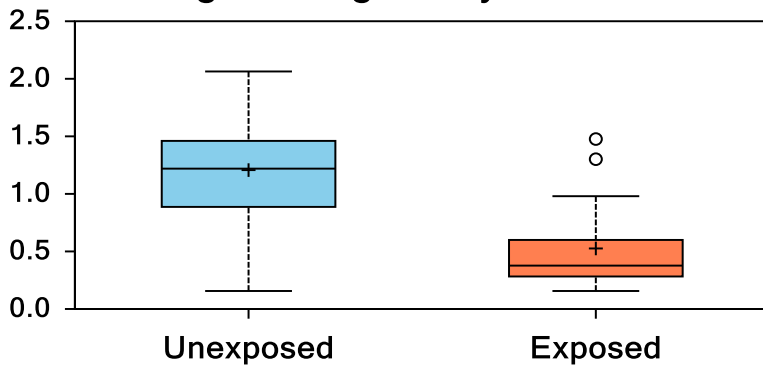

**bradykinin, des-arg(9)**

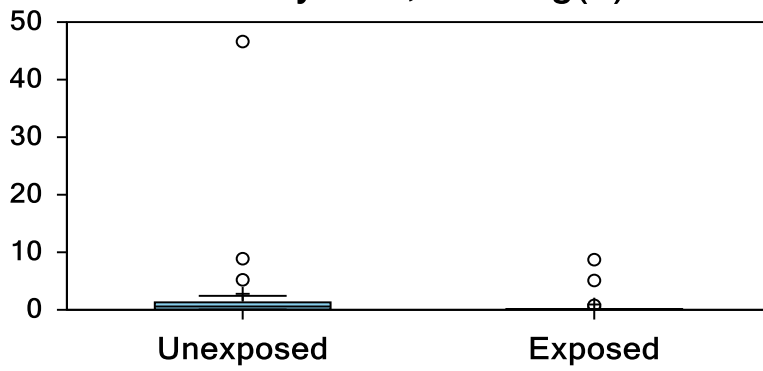



### XHWESASXXR\*

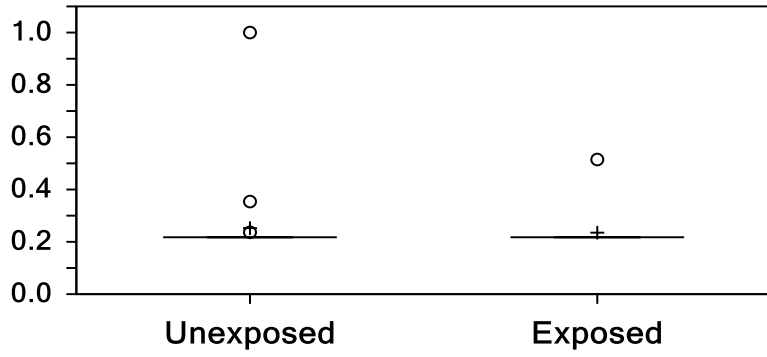

### DSGEGDFXAEGGGVR\*

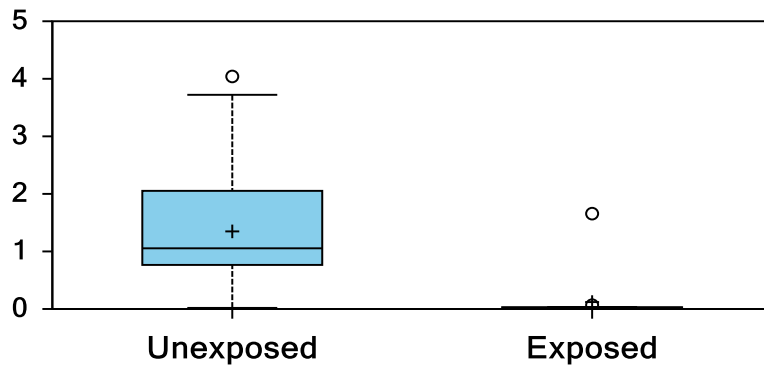

### N-acetylglucosamine

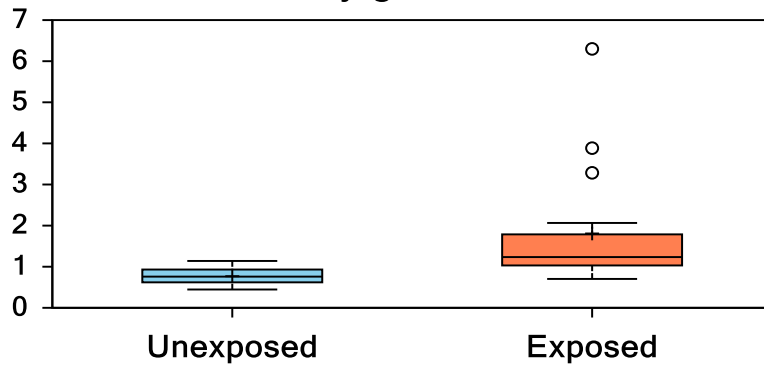

### fuco

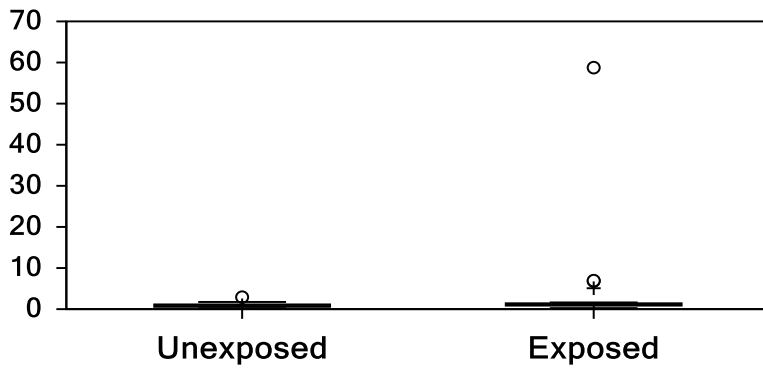

### 6'-sialyllactose

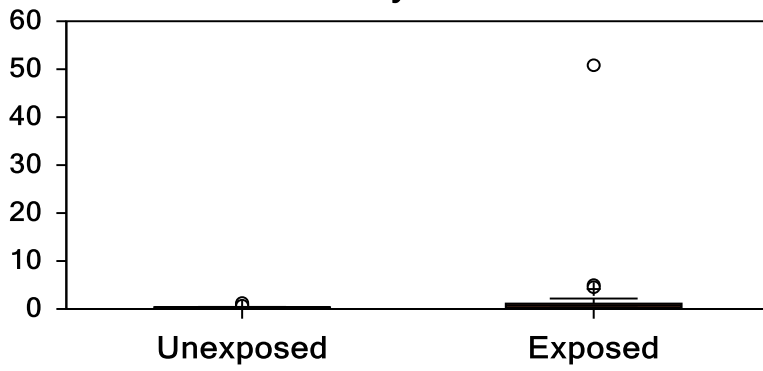

### sorbitol

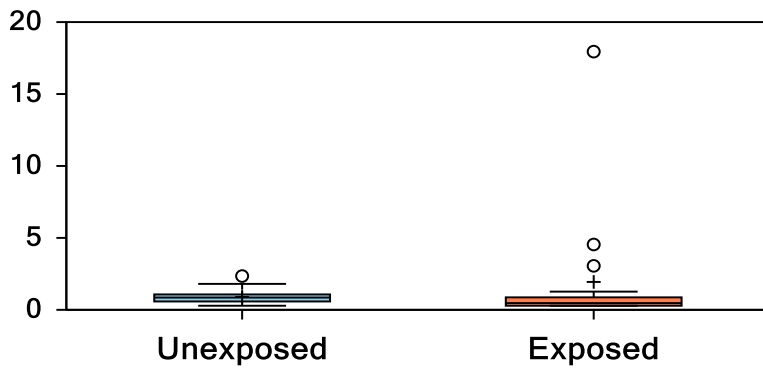

methyl-beta-glucopyranoside

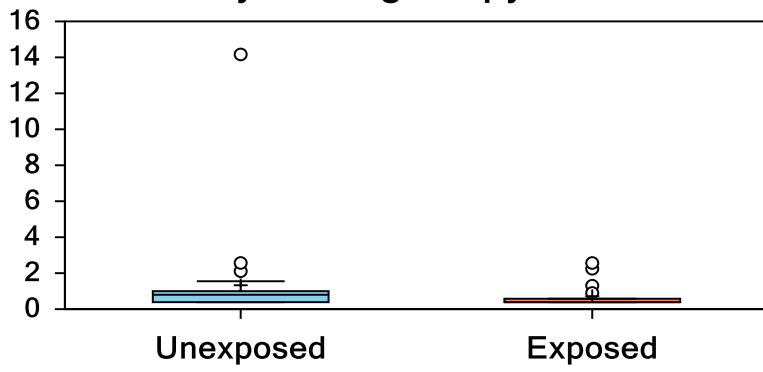

glucose

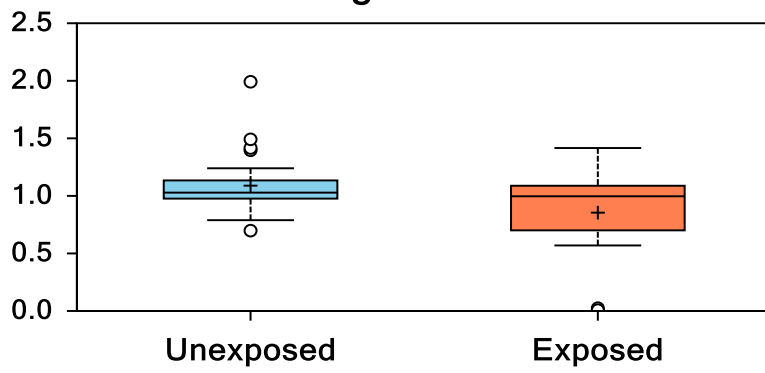

pyruvate

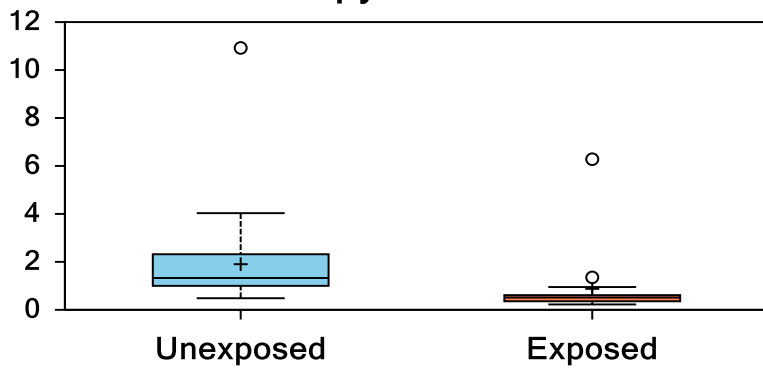

### 2,3-butanediol

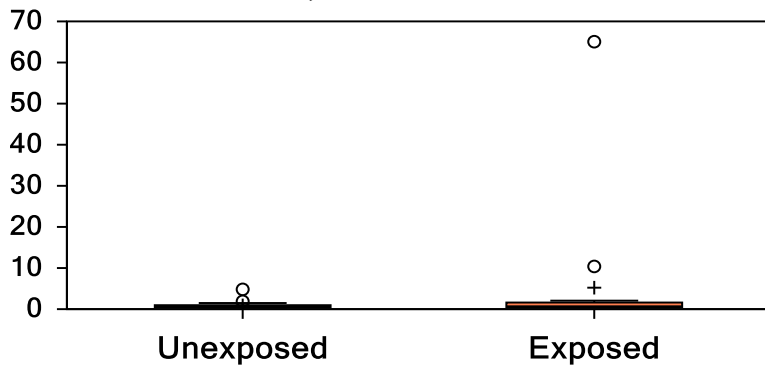

### threitol

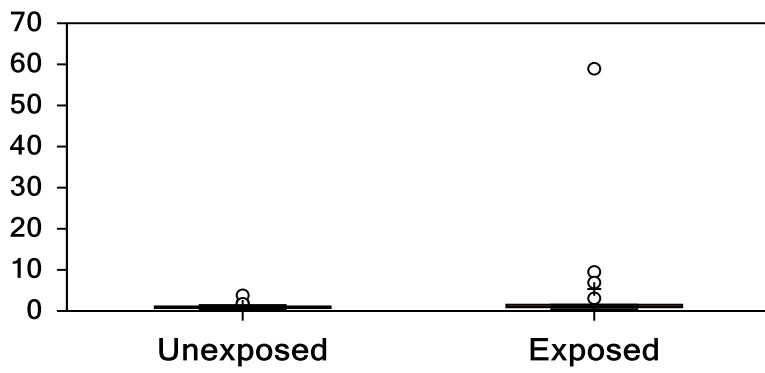

### xylitol

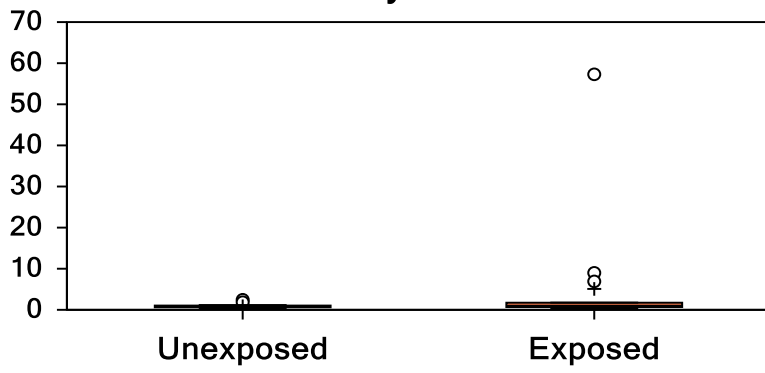

### xylonate

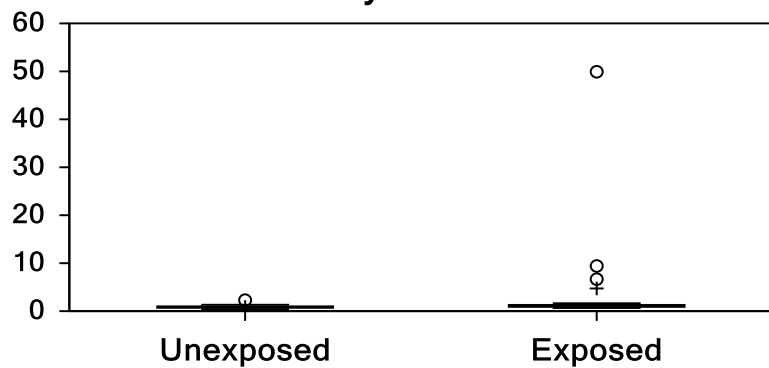

### isocitrate

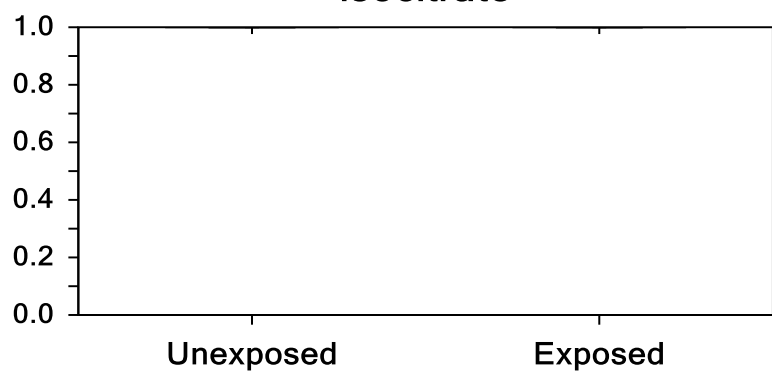

### succinylcarnitine

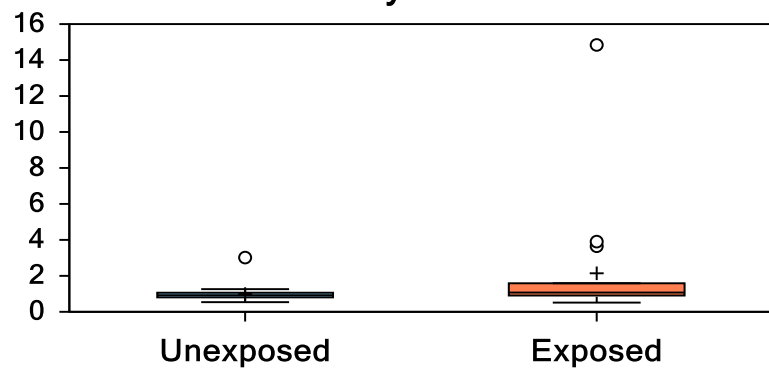

### acetylphosphate

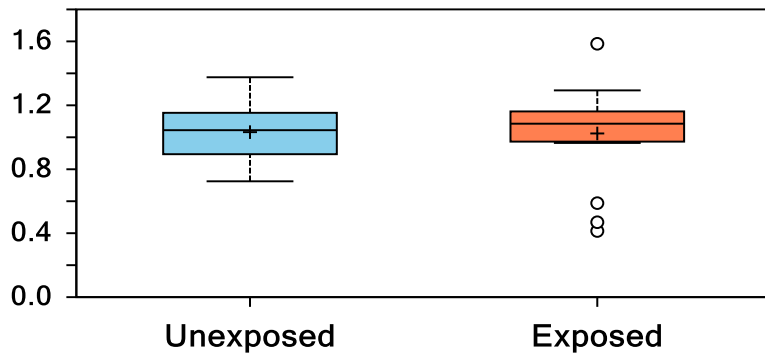

### linolenate [alpha or gamma; (18:3n3 or 6)]

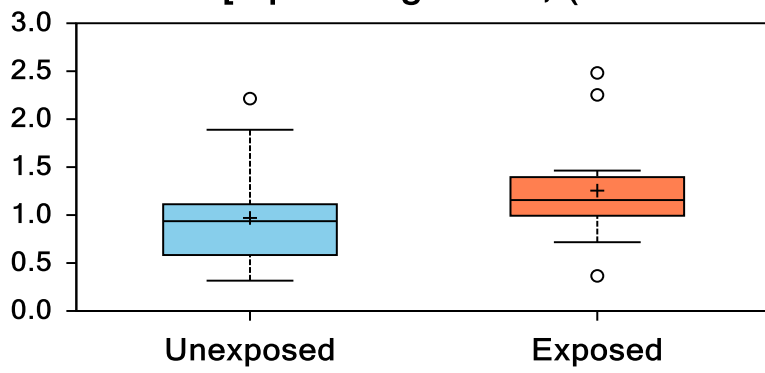

### docosapentaenoate (n3 DPA; 22:5n3)

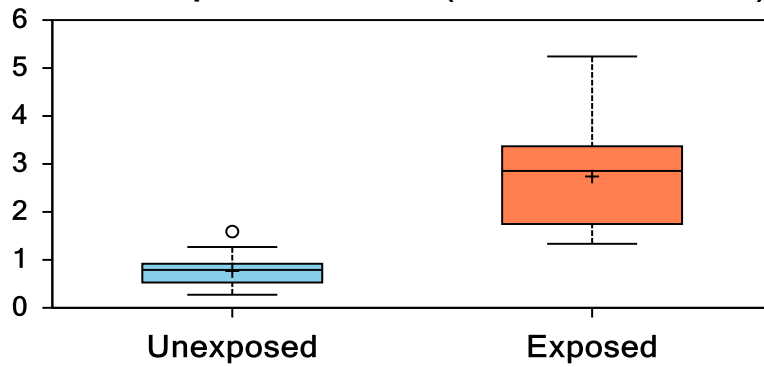

### valerate

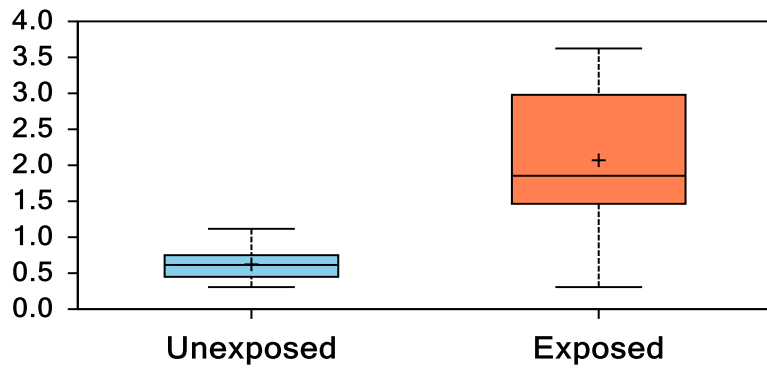

### caprylate (8:0)

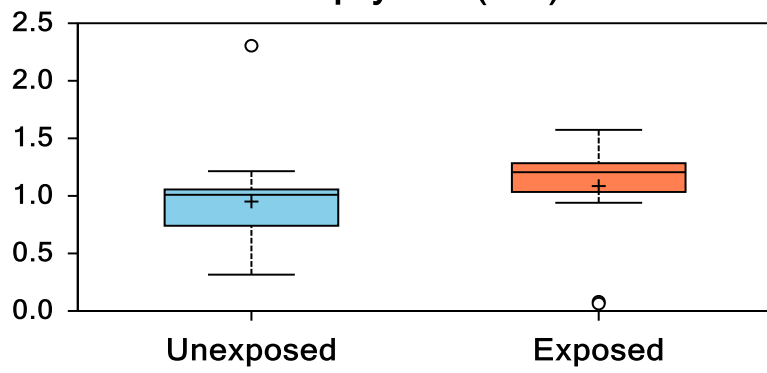

### undecanoate (11:0)

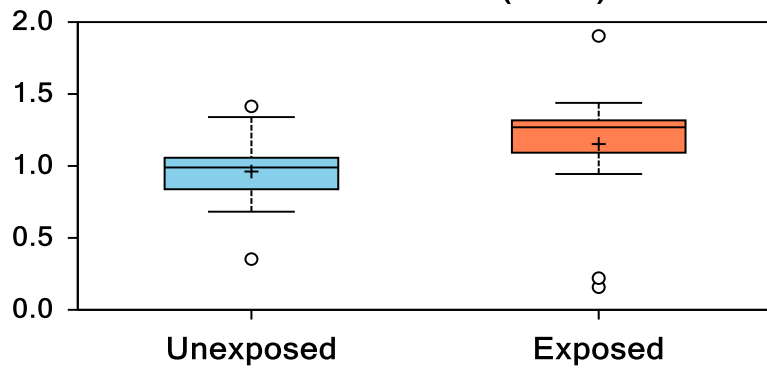

5-dodecenoate (12:1n7)

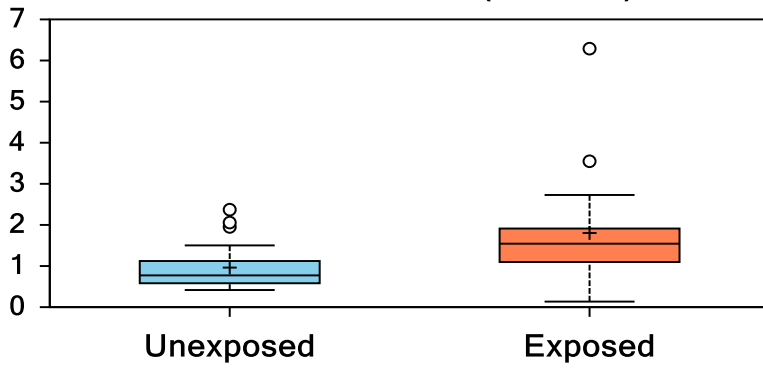

pentadecanoate (15:0)

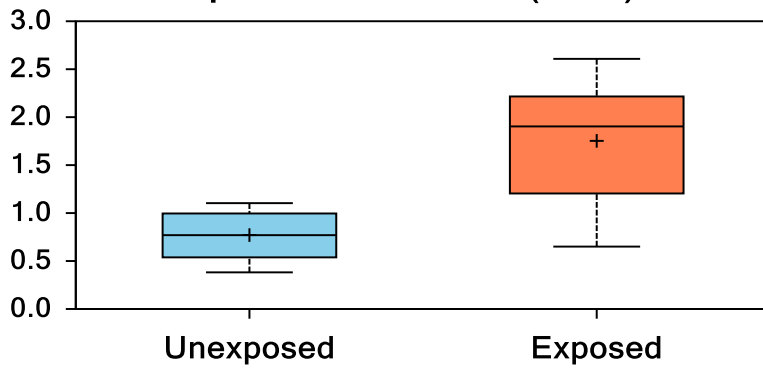

margarate (17:0)

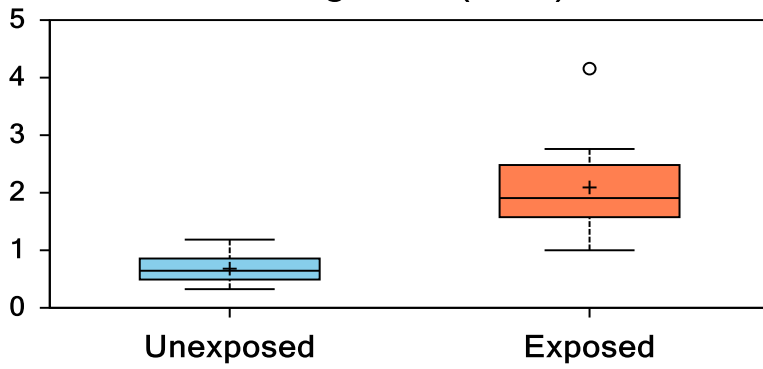



oleate (18:1n9)

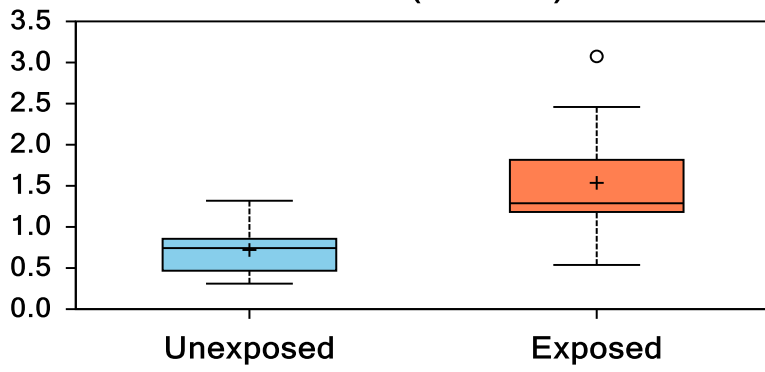

nonadecanoate (19:0)

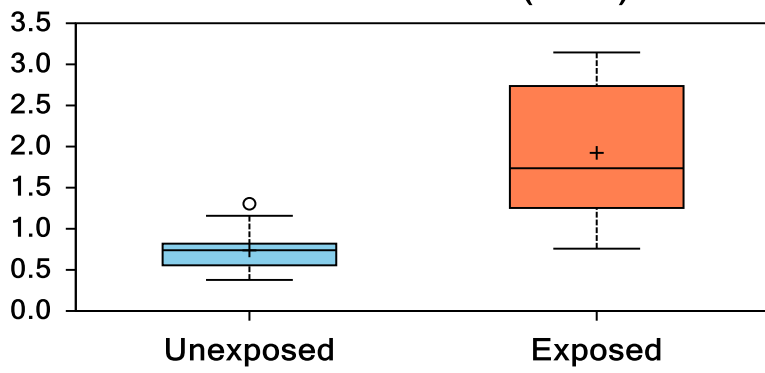

dihomo-linoleate (20:2n6)

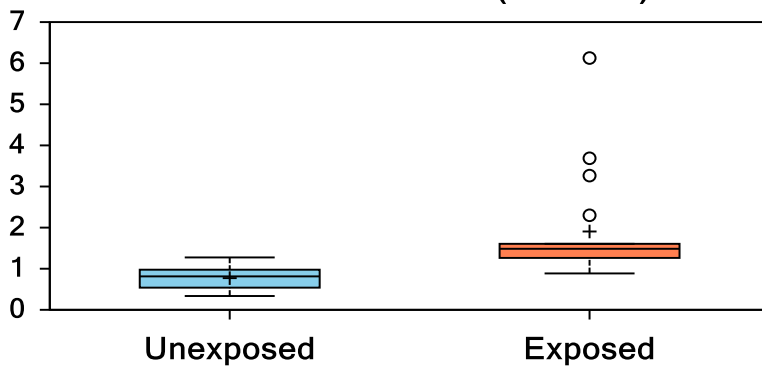

**adrenate (22:4n6)**

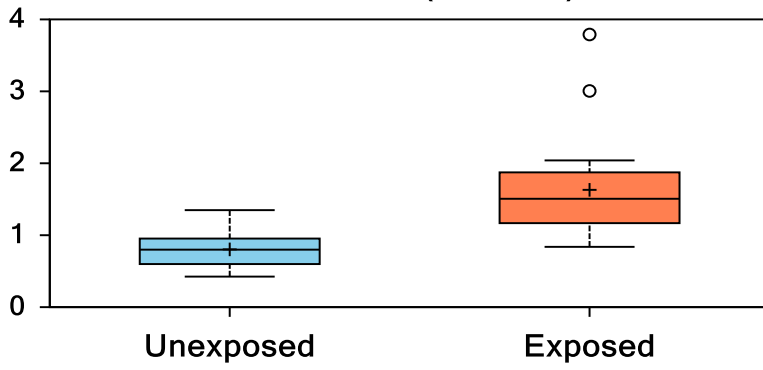

**palmitate, methyl ester**

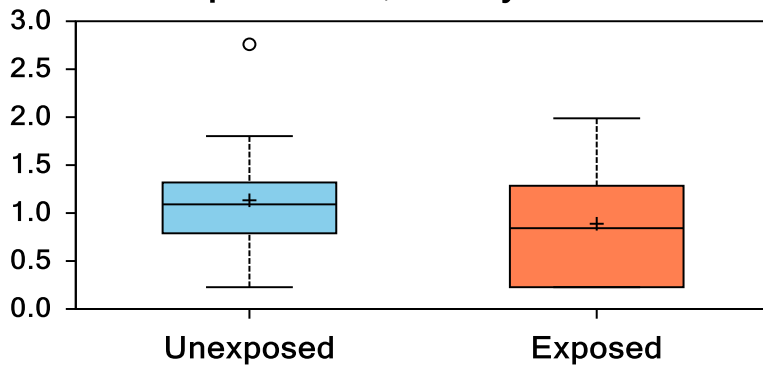

**2-hydroxyoctanoate**

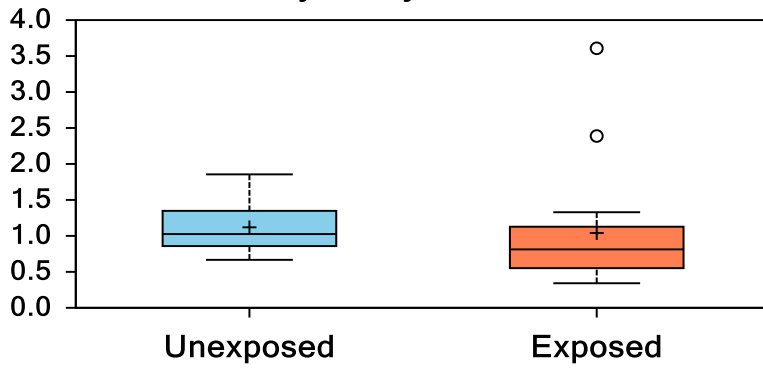

**2-hydroxymyristate**

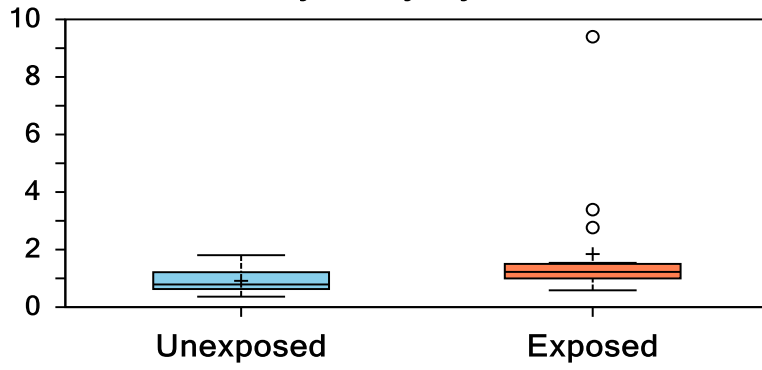

**2-hydroxypalmitate**

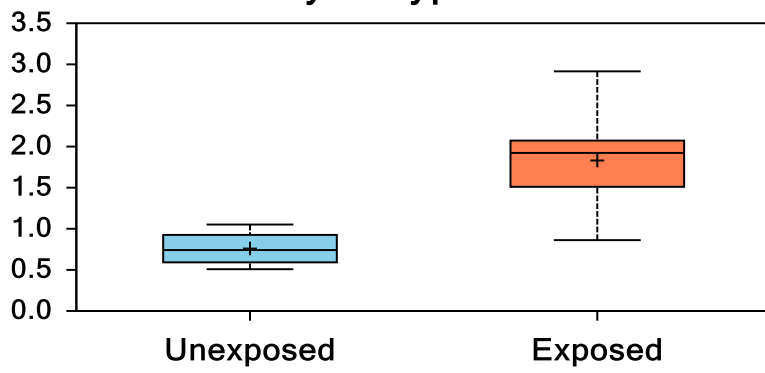

**2-hydroxyglutarate**

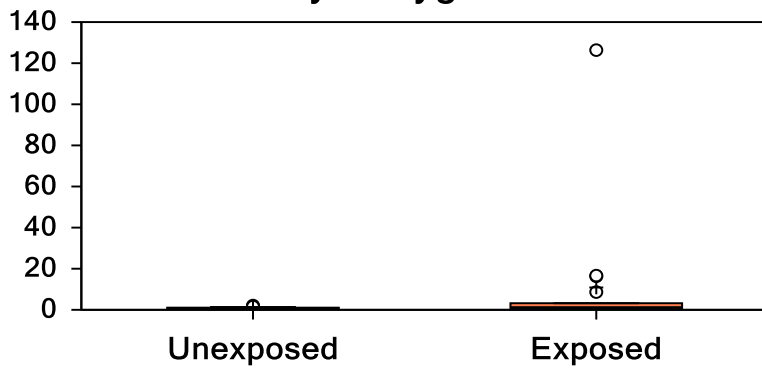

**sebacate (decanedioate)**

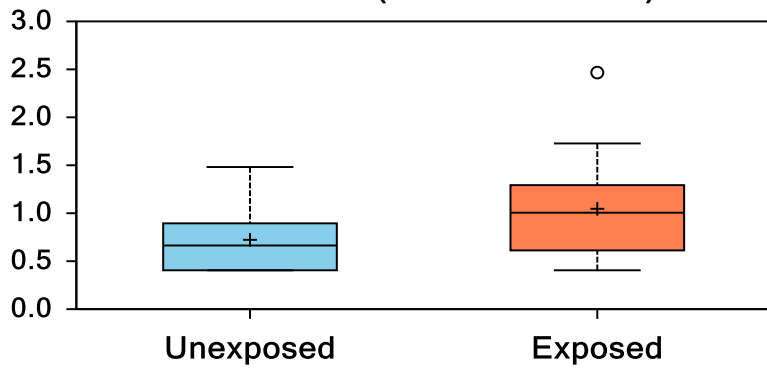

**tetradecanedioate**

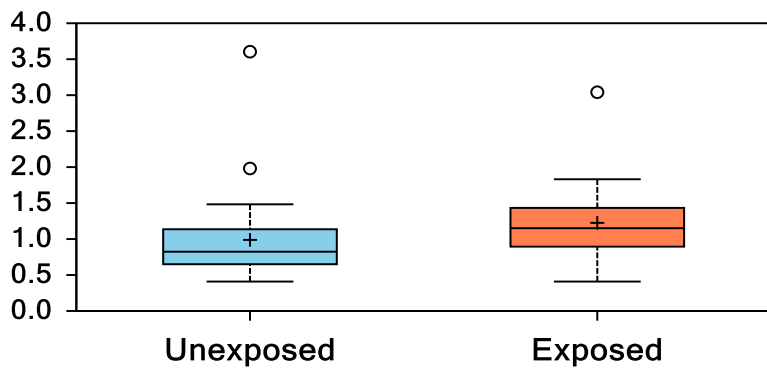

**undecanedioate**

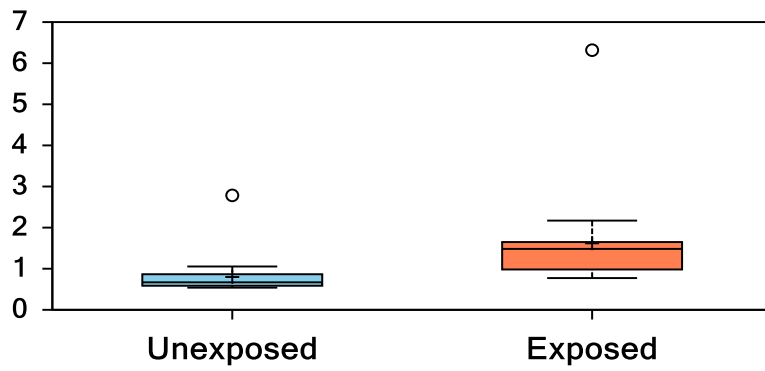

### stearamide

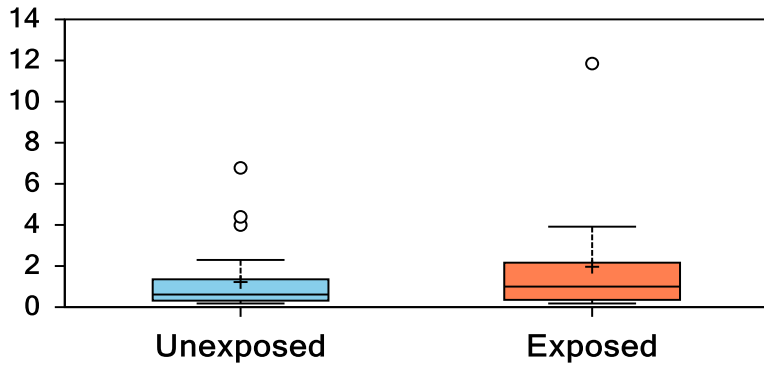

### isopalmitic acid

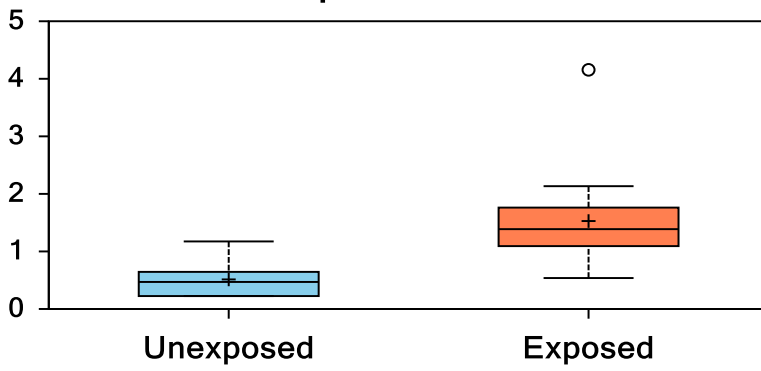

### prostaglandin A2, B2 and 13,14-dihydro-15-keto-p

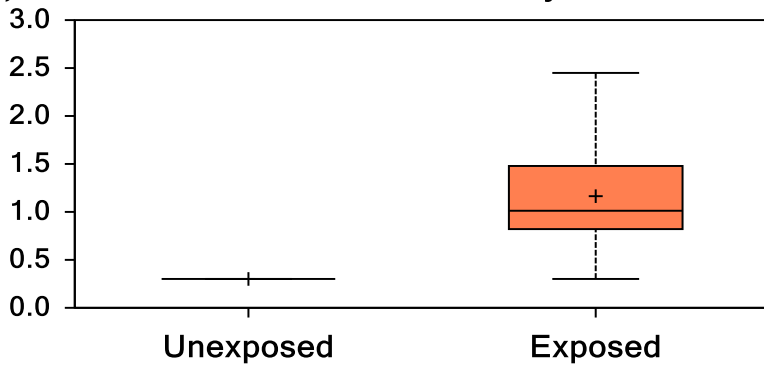

### 18-HEPE

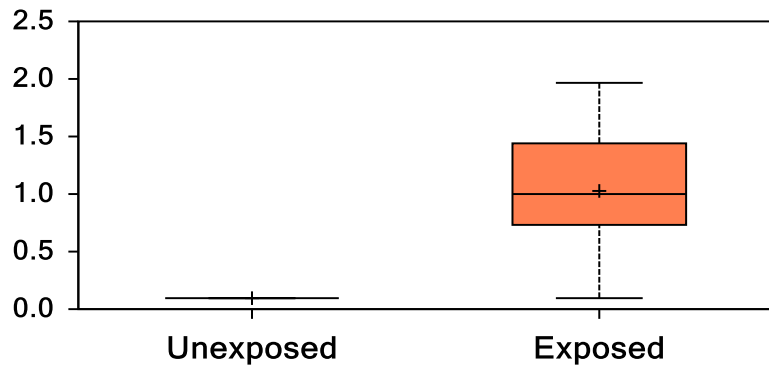

### 12-HETE

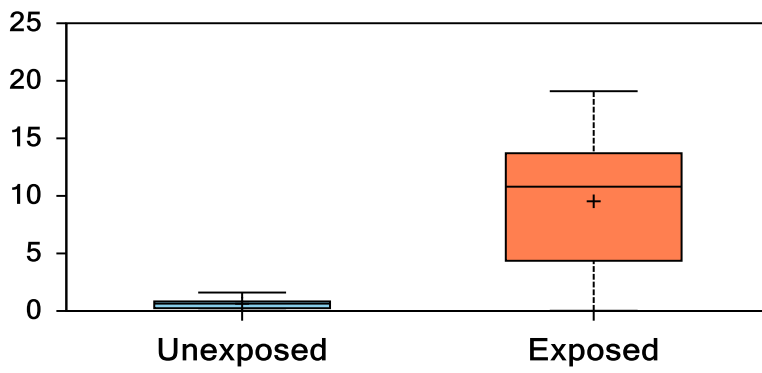

### propionylcarnitine

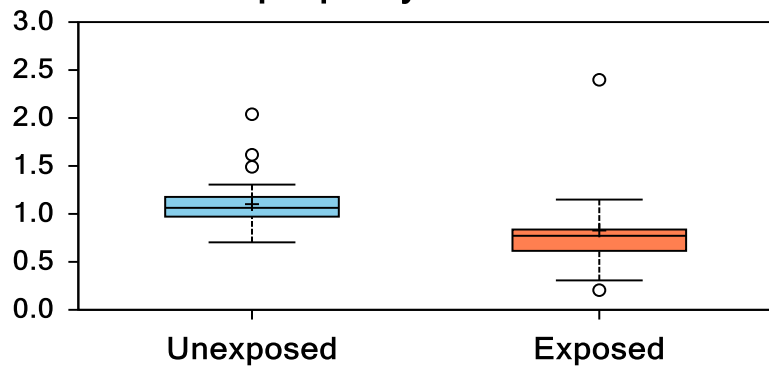

hexanoylglycine

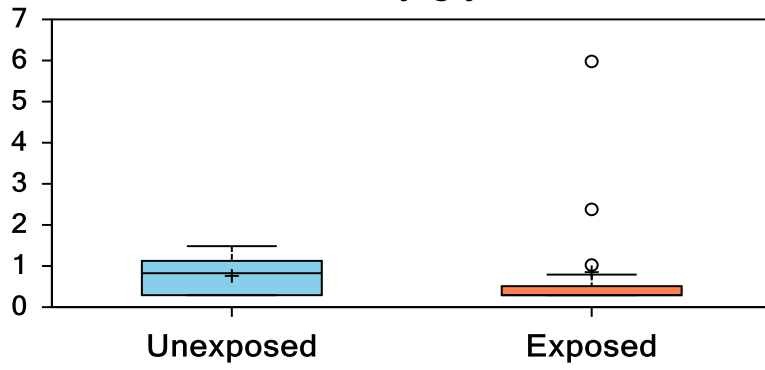

3-dehydrocarnitine\*

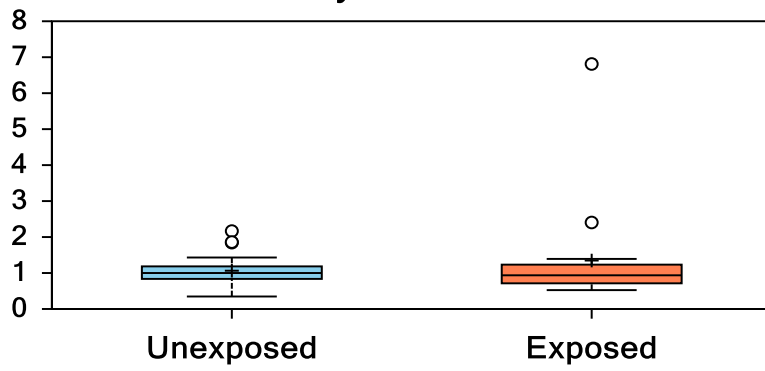

octanoylcarnitine

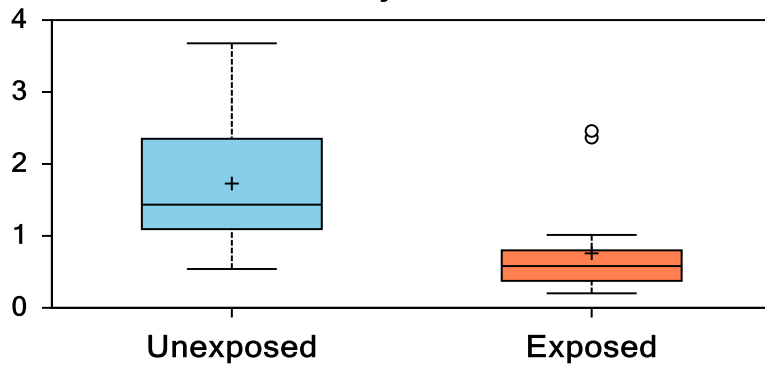

### laurylcarnitine

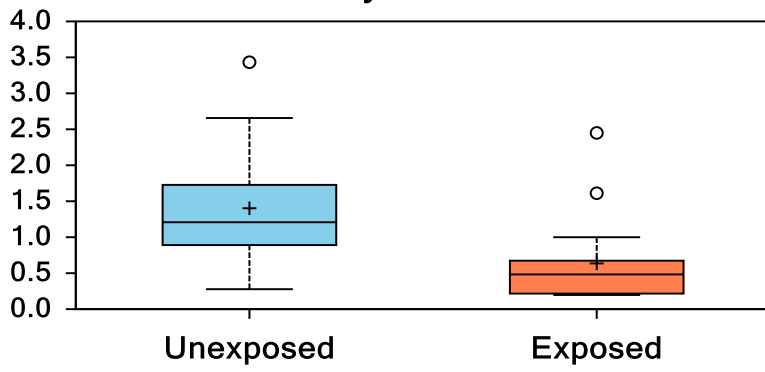

### stearoylcarnitine

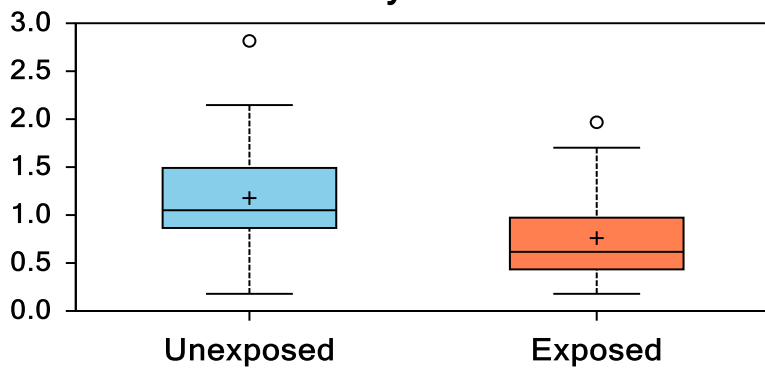

### glycocholate

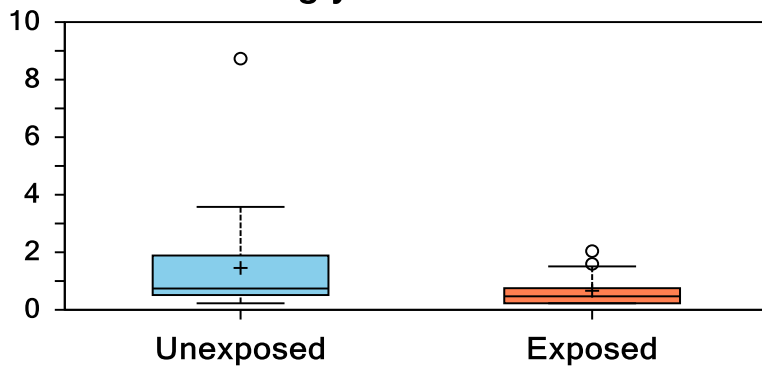



### deoxycholate

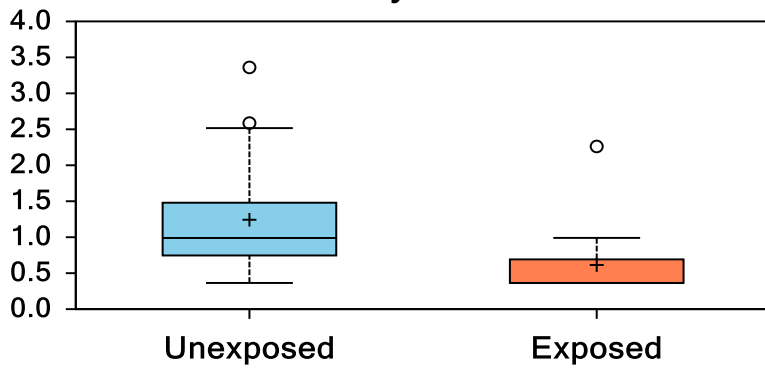

### 7-ketodeoxycholate

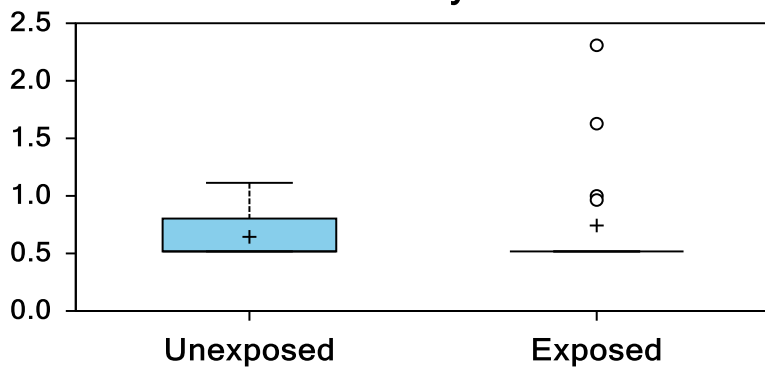

### tauro lithocholate 3-sulfate

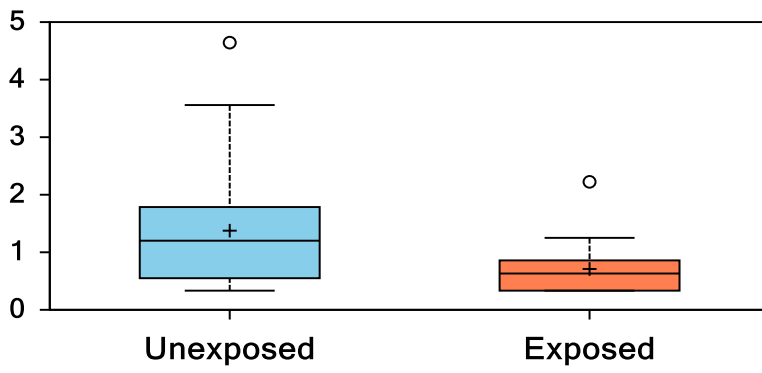

glycoursodeoxycholate

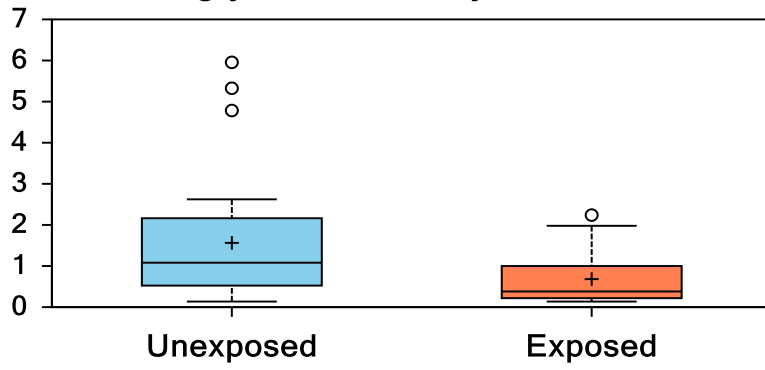

glycerol

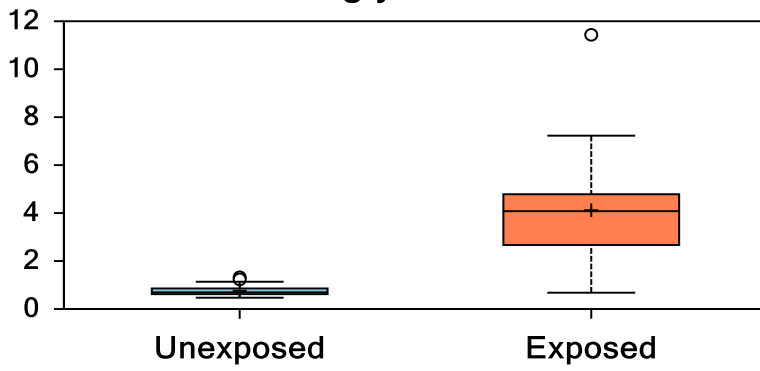

glycerophosphorylcholine (GPC)

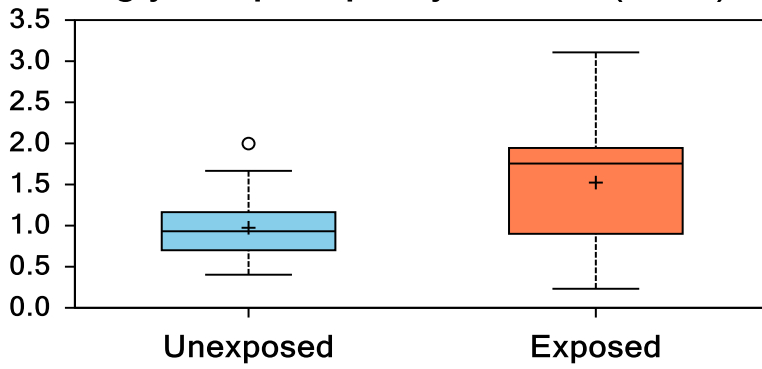

### pinitol

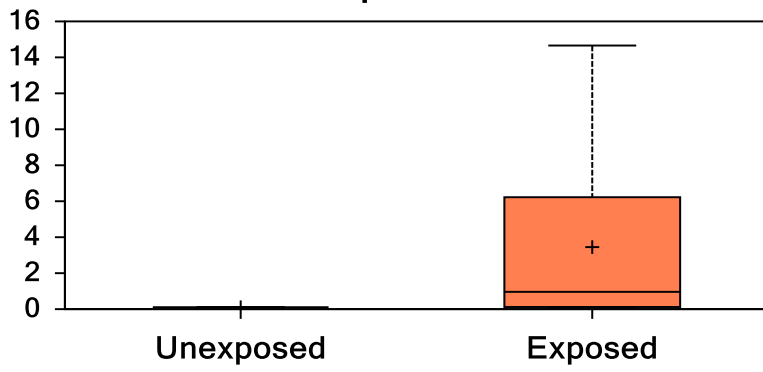

### 1,2-propanediol

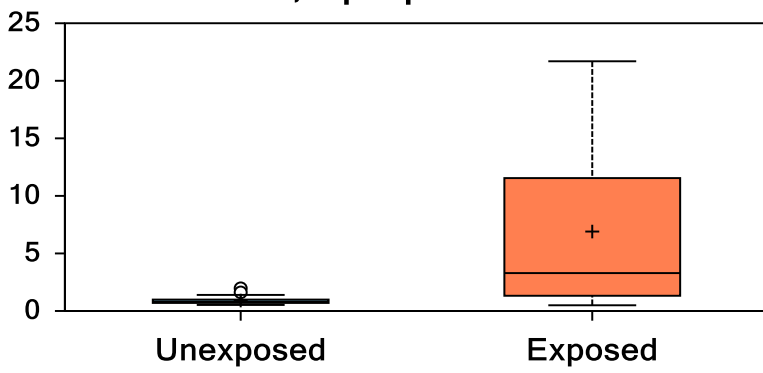

### 1-stearoylglycerophosphoethanolamine

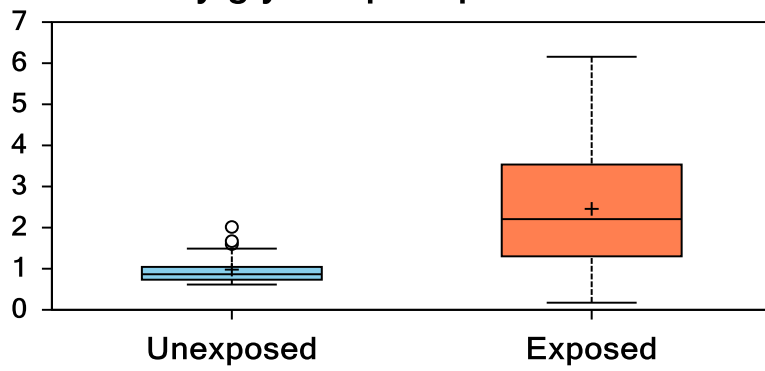

### 1-linoleoylglycerophosphoethanolamine'

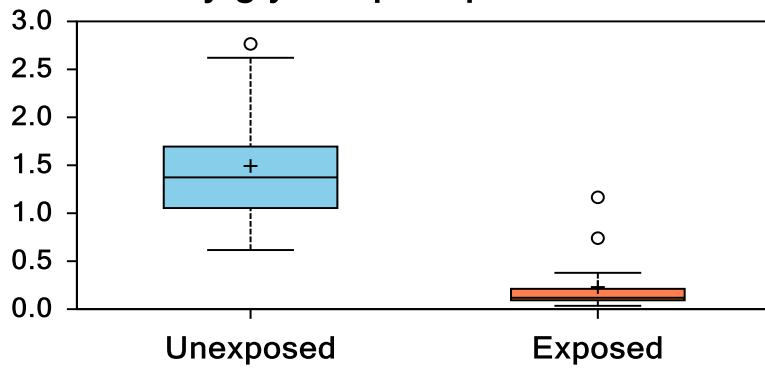

### 2-arachidonoylglycerophosphoethanolamir

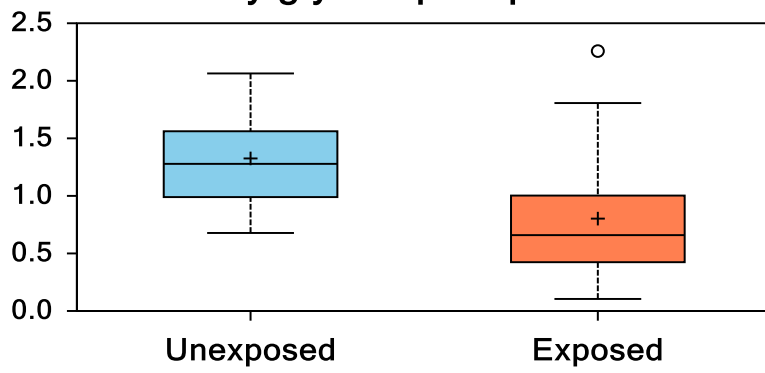

### 2-myristoylglycerophosphocholine\*

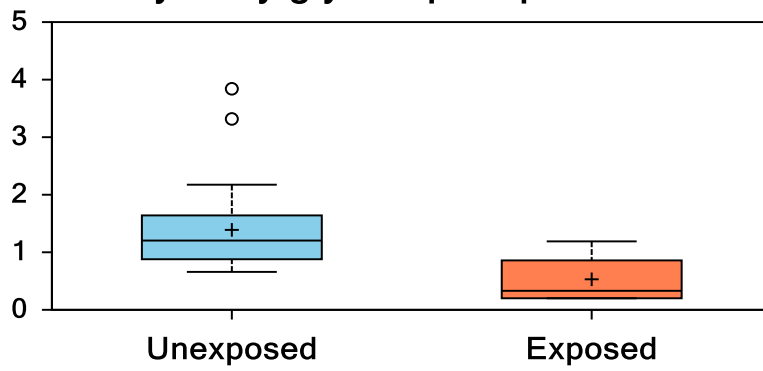

### 2-palmitoylglycerophosphocholine\*

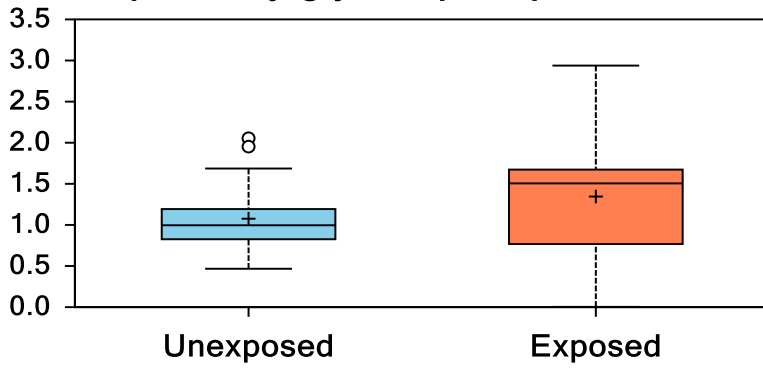

### 1-heptadecanoylglycerophosphocholine

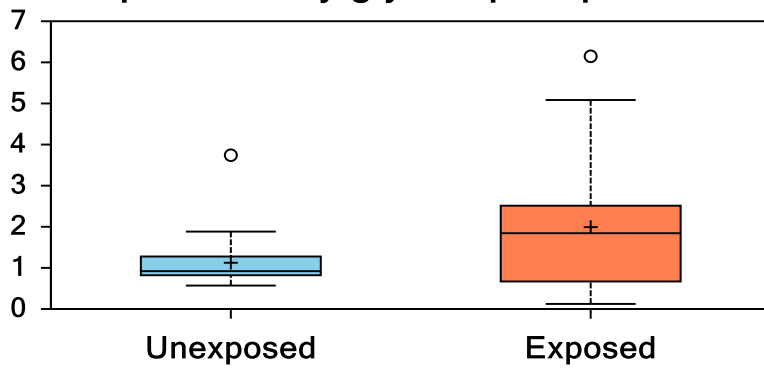

### 1-oleoylglycerophosphocholine

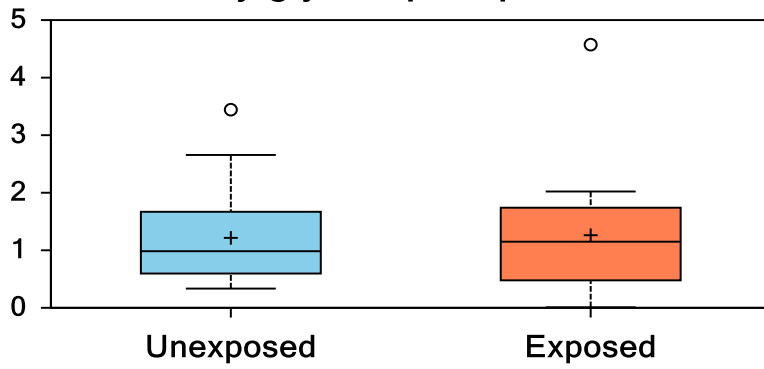

### 2-linoleoylglycerophosphocholine\*

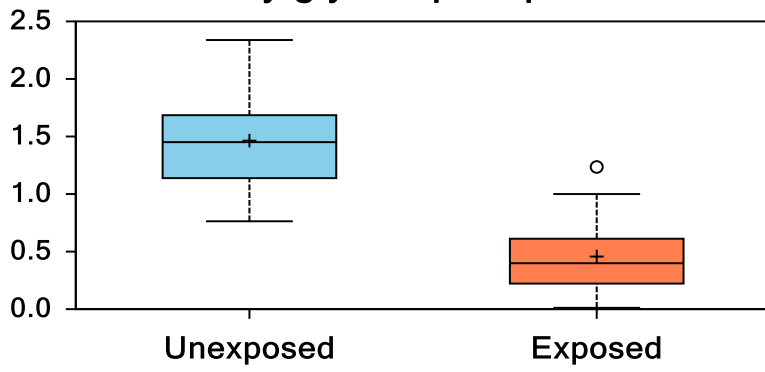

### 1-eicosatrienoylglycerophosphocholine\*

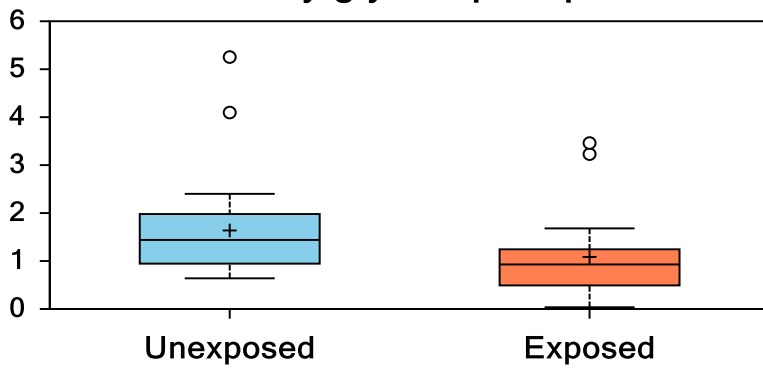

### 2-arachidonoylglycerophosphocholine\*

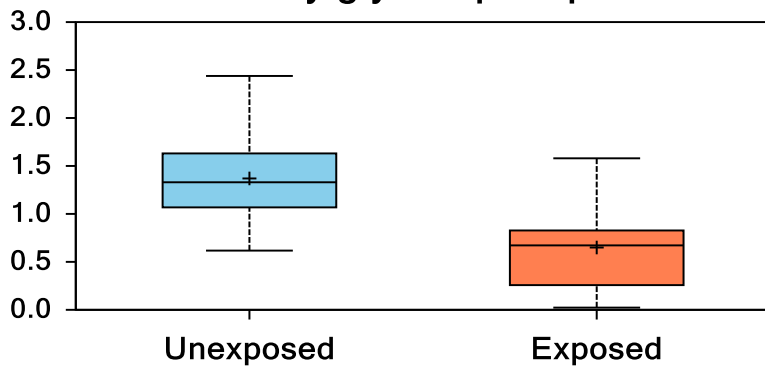

### 1-palmitoylglycerophosphoinositol\*

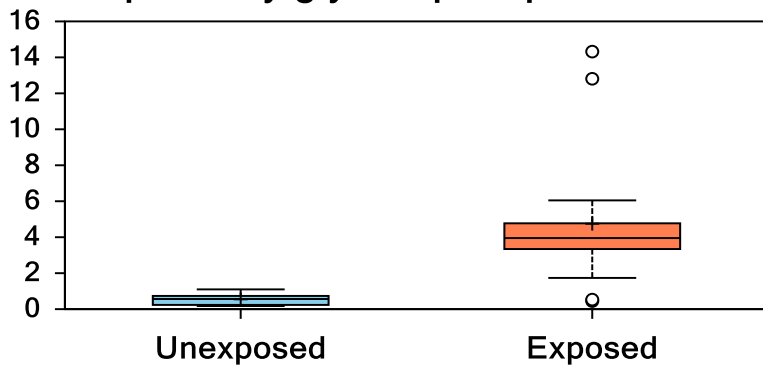

### 1-palmitoylplasmenylethanolamine\*

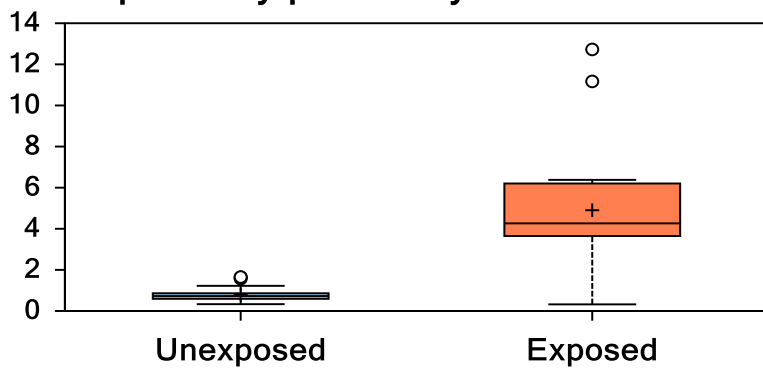

### 1-linoleoylglycerol (1-monolinolein)

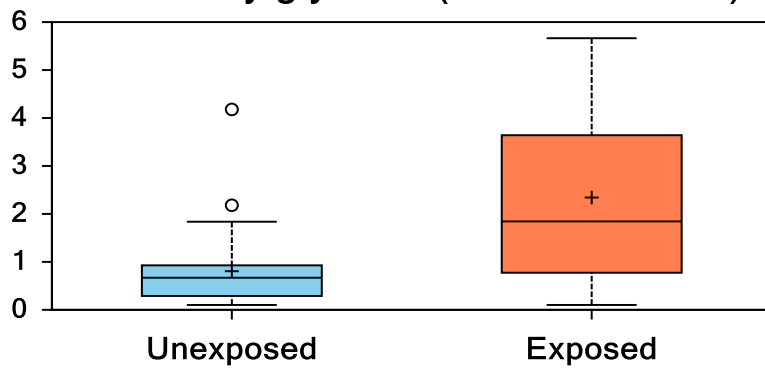

### sphingosine

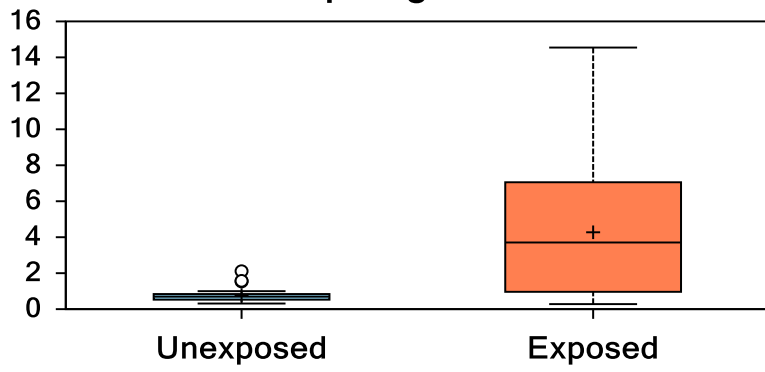

### palmitoyl sphingomyelin

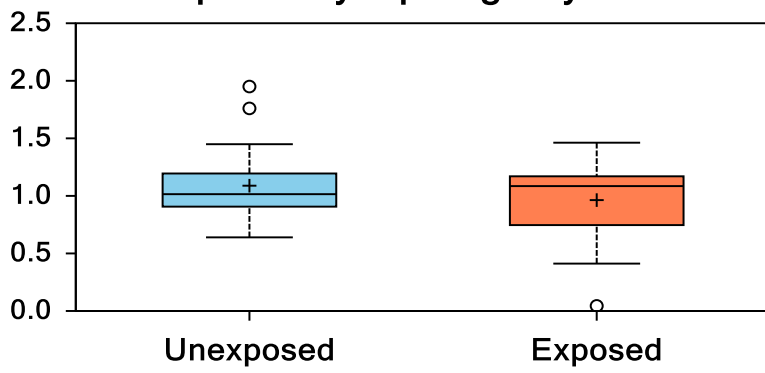

### lathosterol

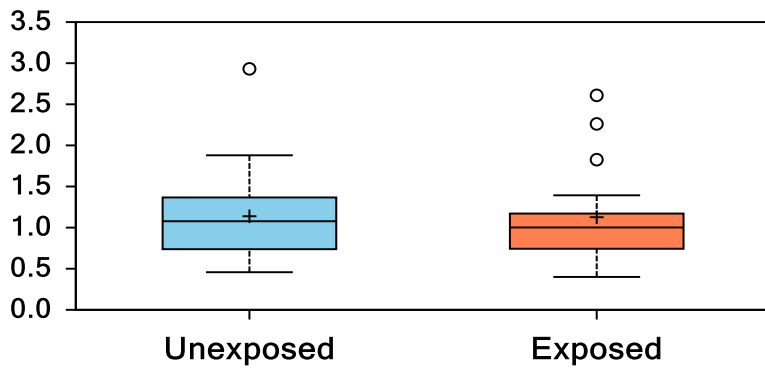



### 7-alpha-hydroxycholesterol

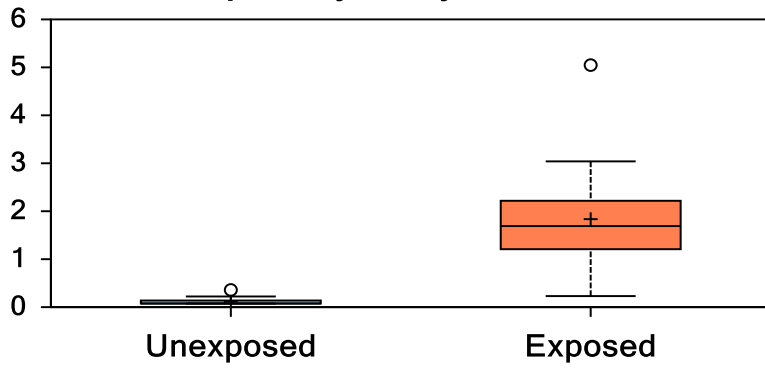

### dehydroisoandrosterone sulfate (DHEA-S)

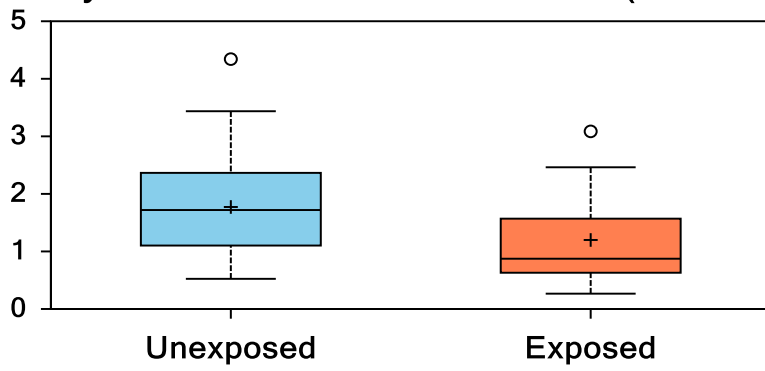

### cortisol

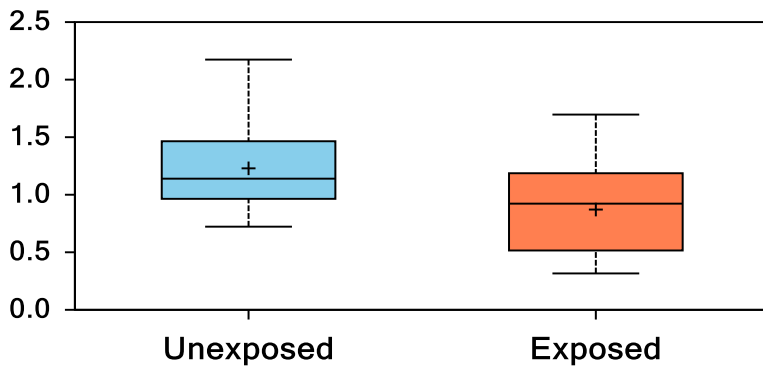

### campesterol

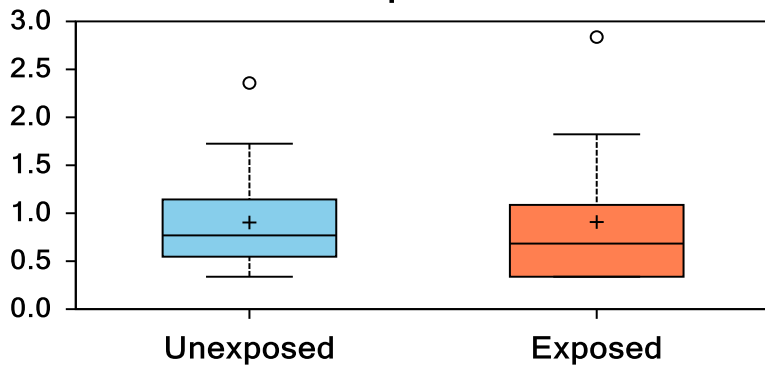

### 4-androsten-3beta,17beta-diol disulfate 2\*

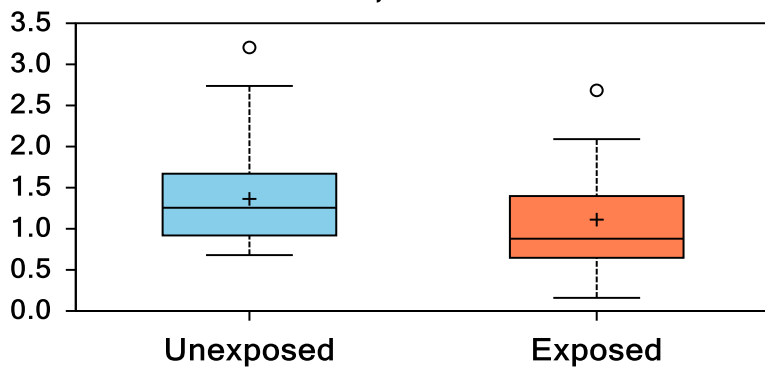

### 5alpha-androstan-3beta,17beta-diol disulfa

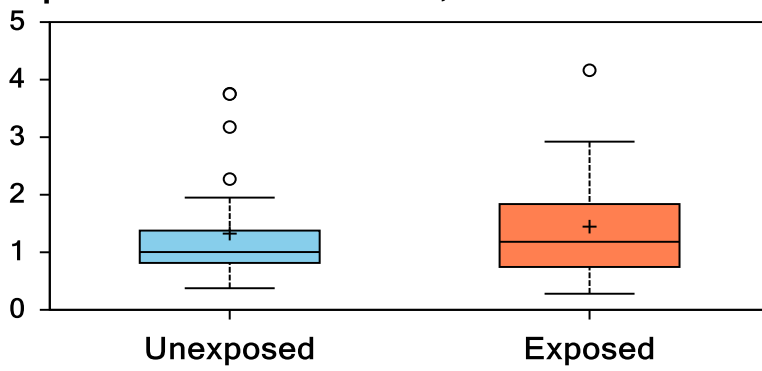

pregnen-diol disulfate\*

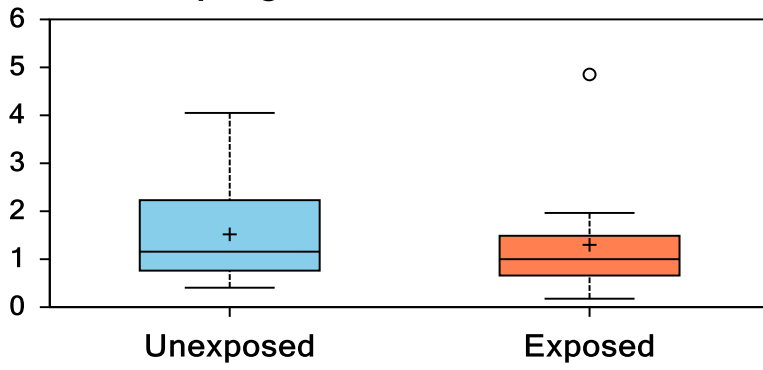

alpha-androstan-3beta,17alpha-diol disulfa

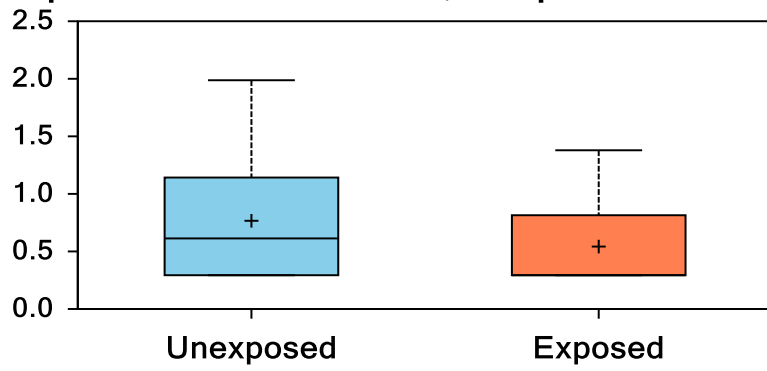

xanthine

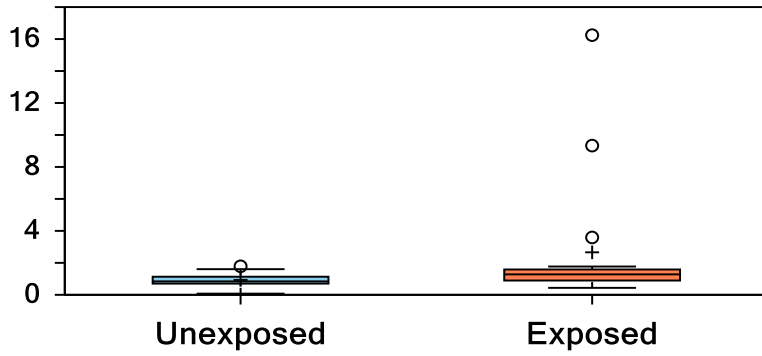

### inosine

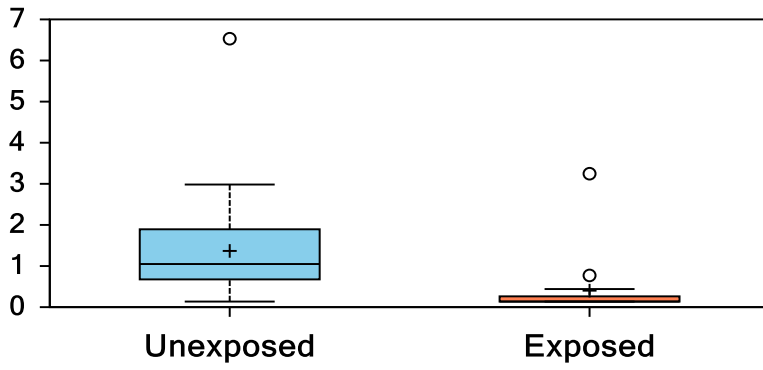

### N6-methyladenosine

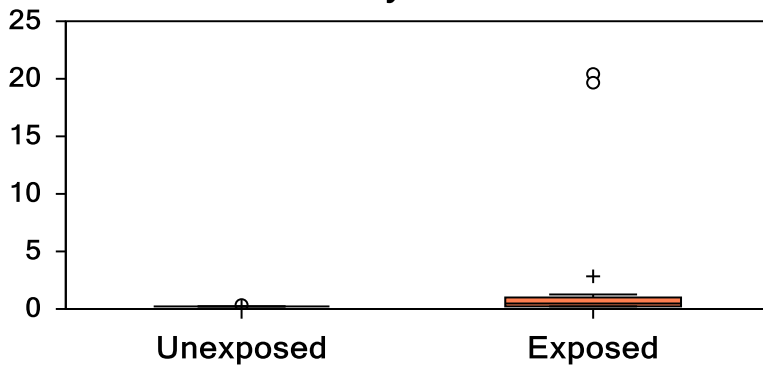

### N1-methylguanosine

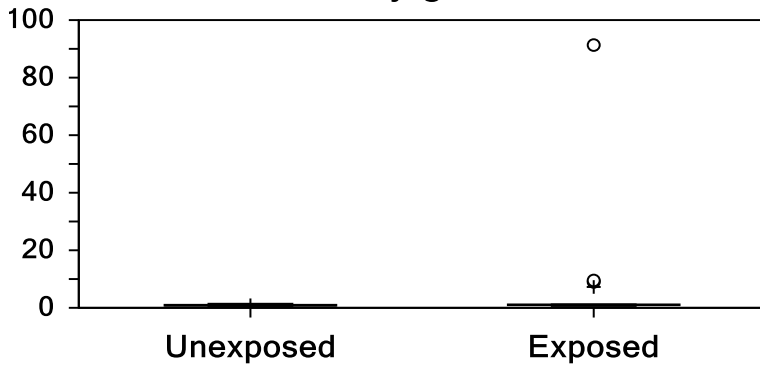

### N2,N2-dimethylguanosine

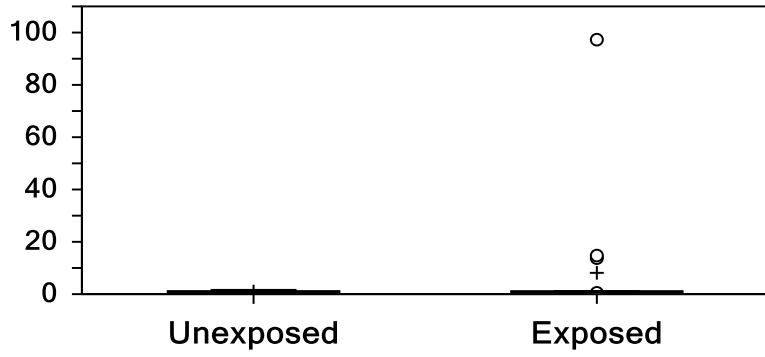

### allantoin

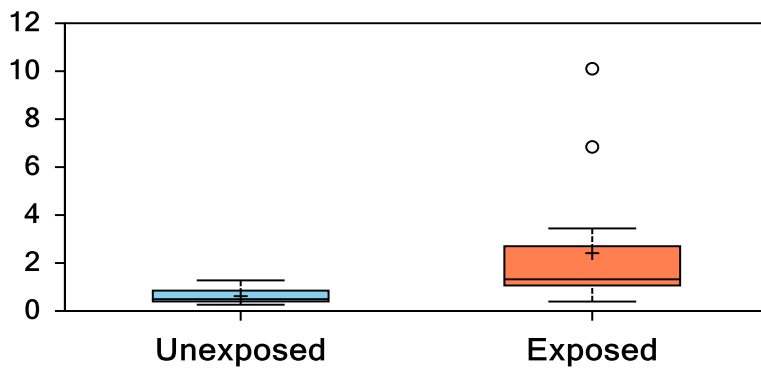

### thymine

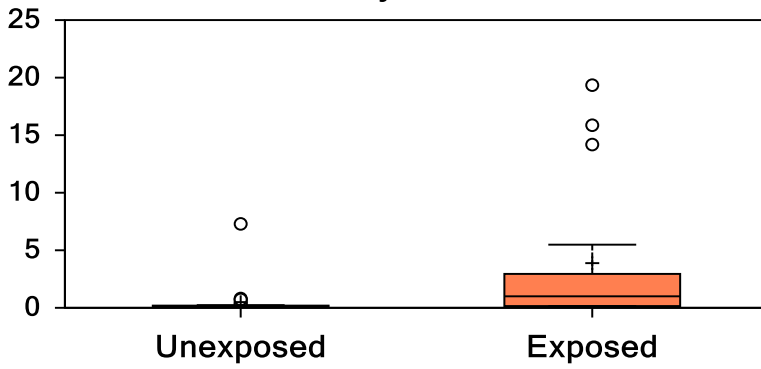

### uracil

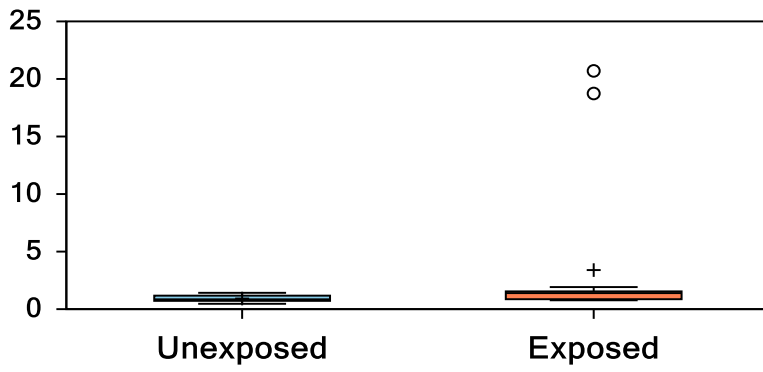

### 5-methyluridine (ribothymidine)

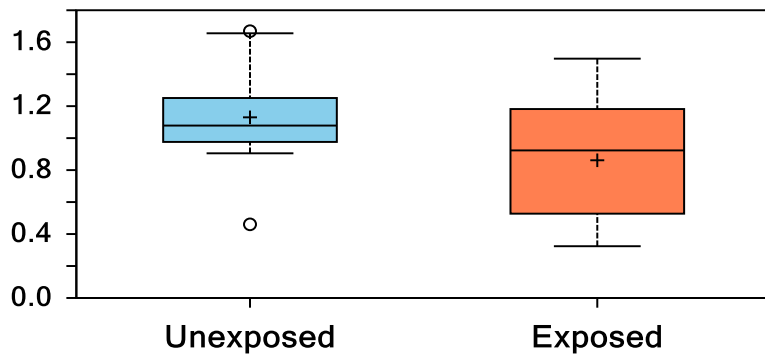

### threonate

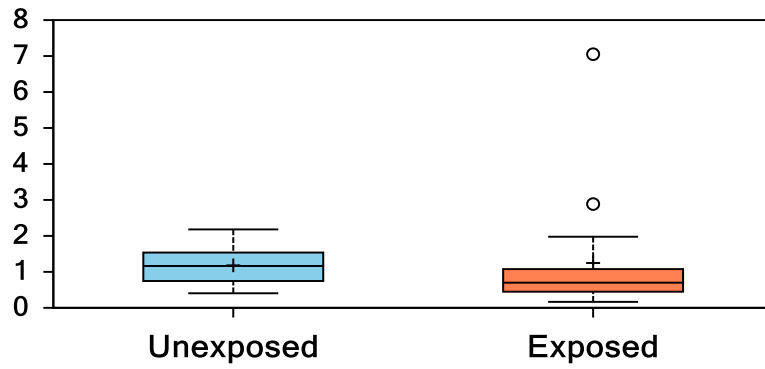

**heme\***

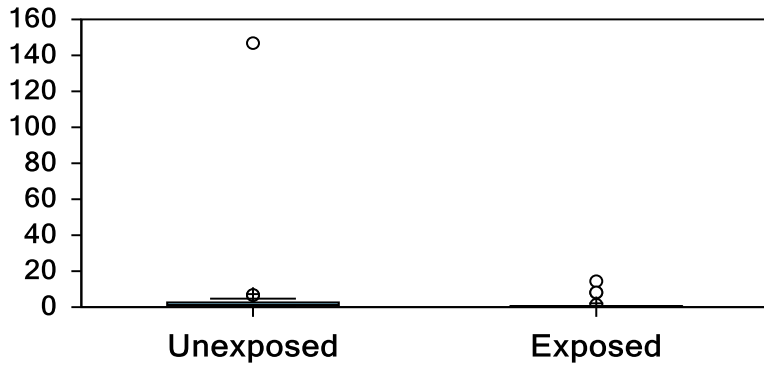

**bilirubin (E,E)\***

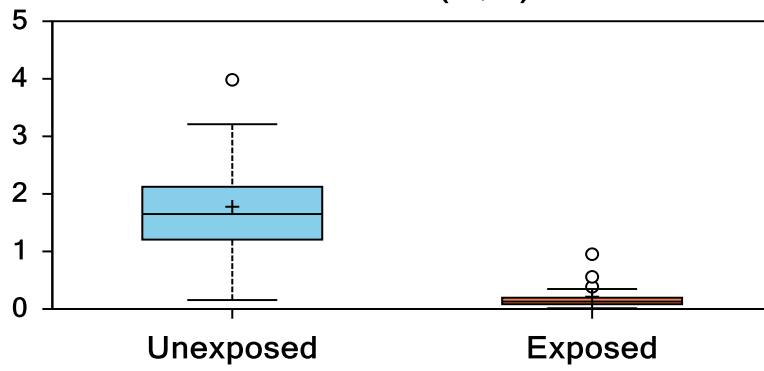

**nicotinamide**

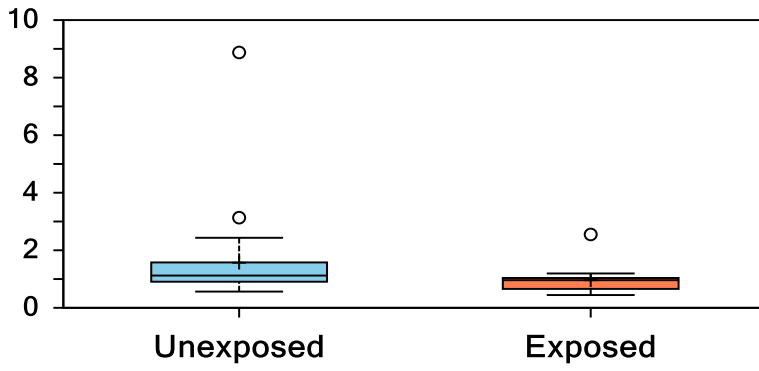

### nicotinate

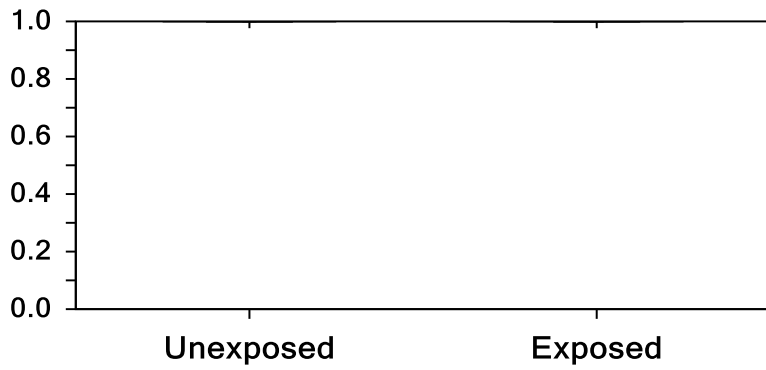

### 2,3-dihydroxyisovalerate

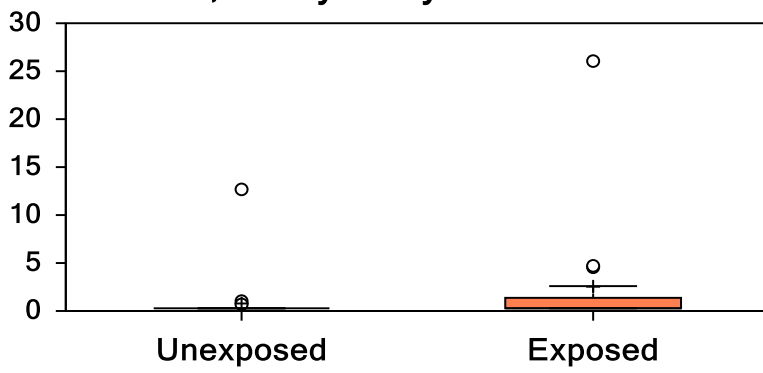

### gamma-tocopherol

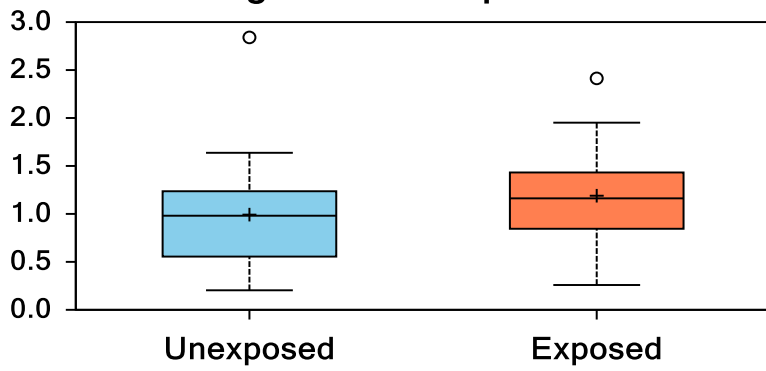



### pyridoxine (Vitamin B6)

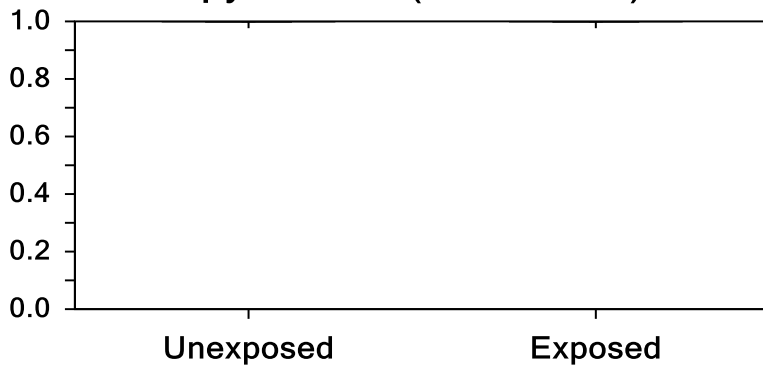

### 2-hydroxyhippurate (salicylurate)

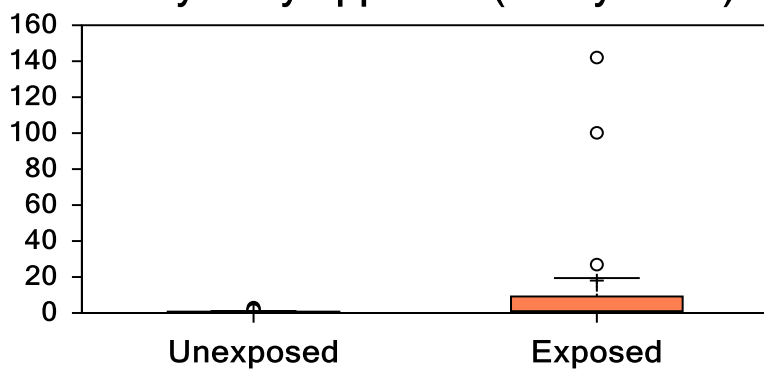

### mandelate

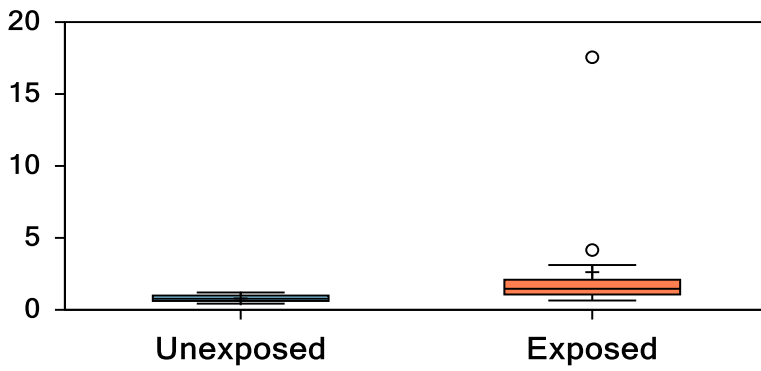

### methyl-4-hydroxybenzoate

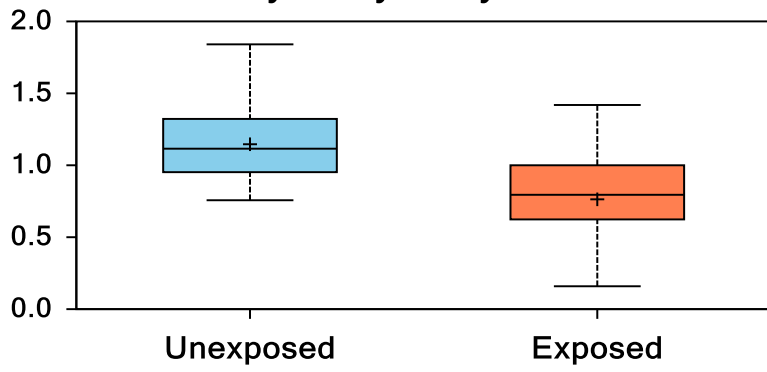

### 4-ethylphenylsulfate

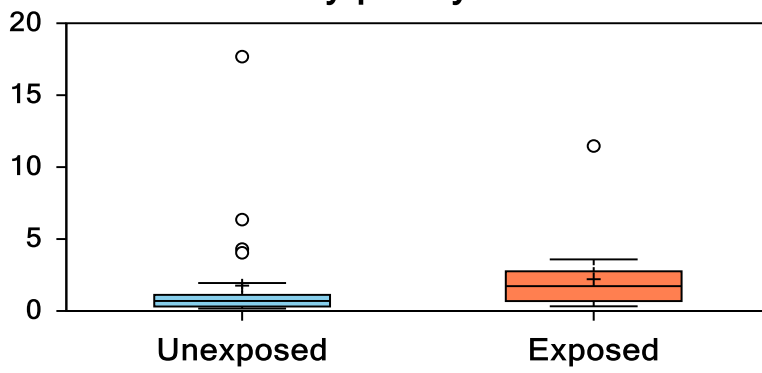

### iminodiacetate (IDA)

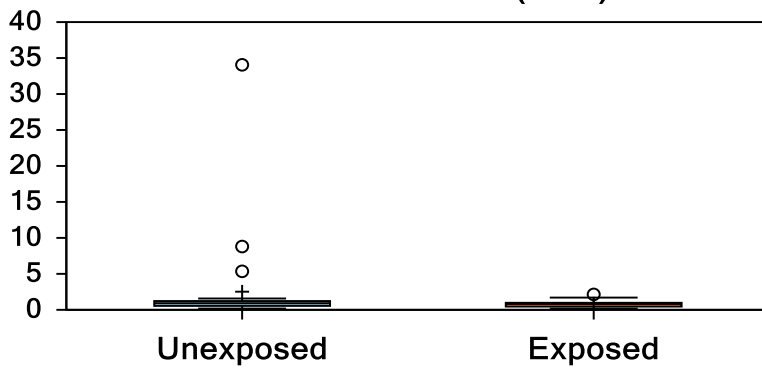

**cyclo(gly-glu)**

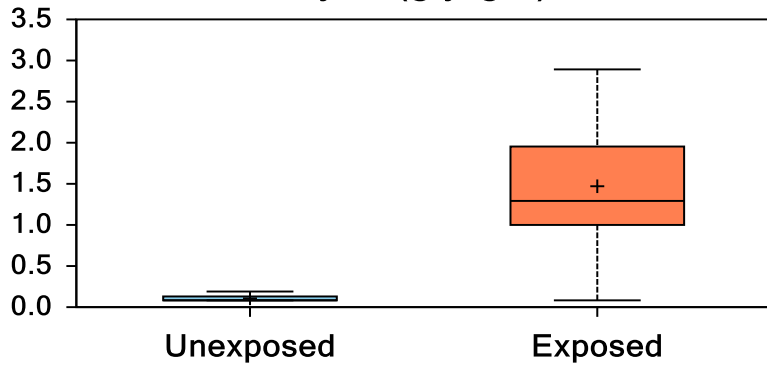

**nicotine**

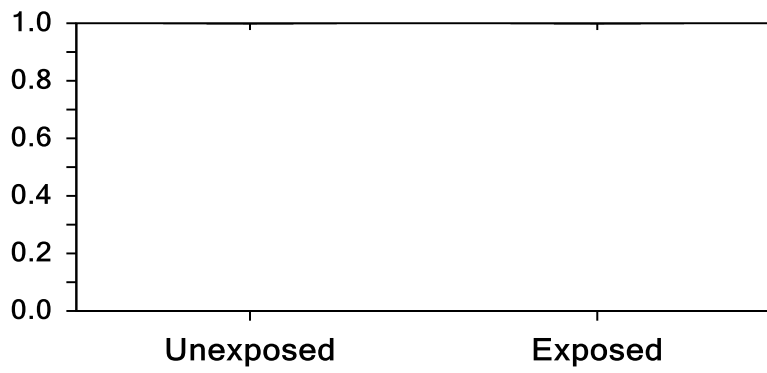

**salicyluric glucuronide\***

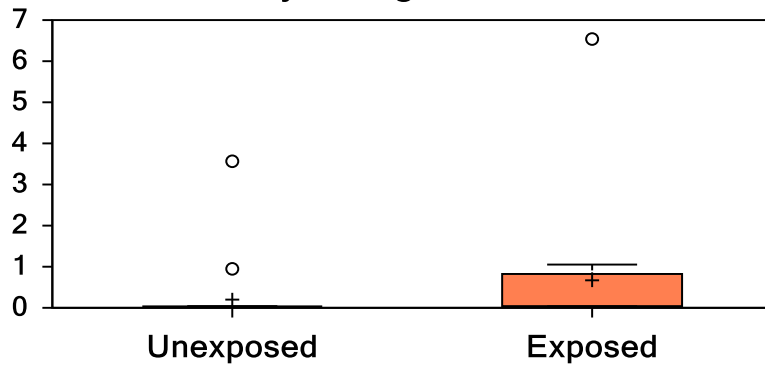

### p-acetamidophenylglucuronide

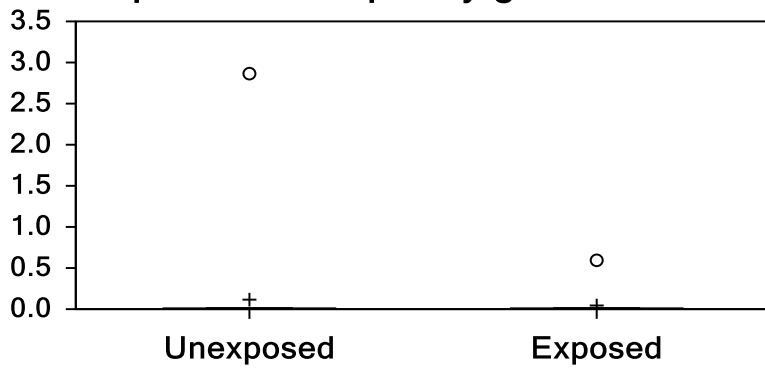

### 3-(cystein-S-yl)acetaminophen\*

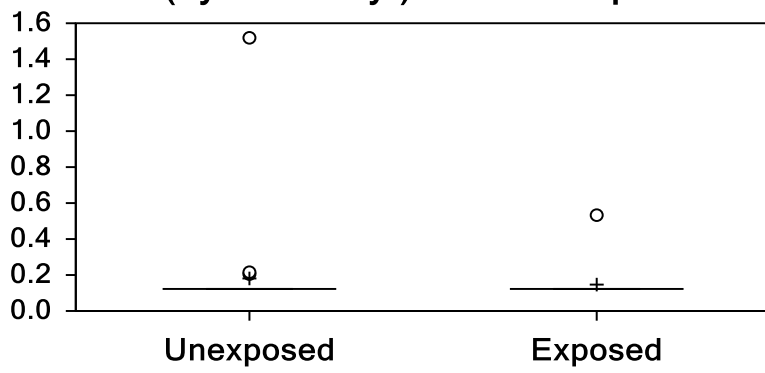

### naproxen

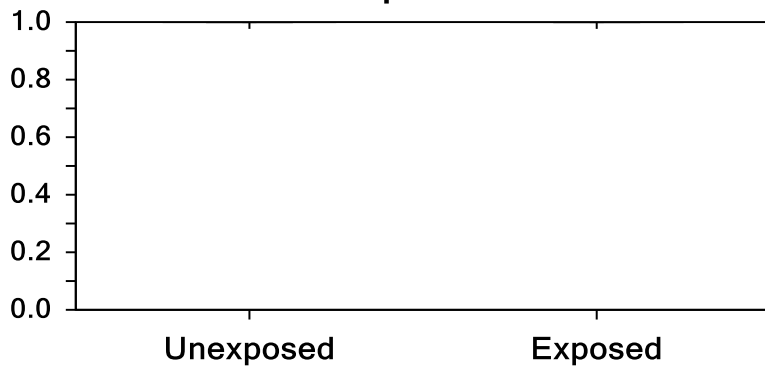

### ketamine



### metoprolol acid metabolite\*

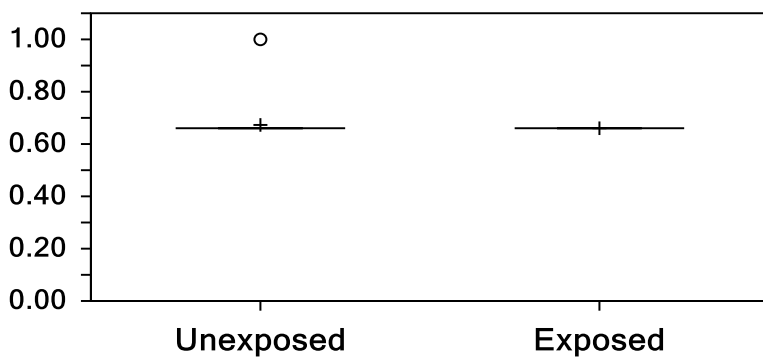

### citalopram

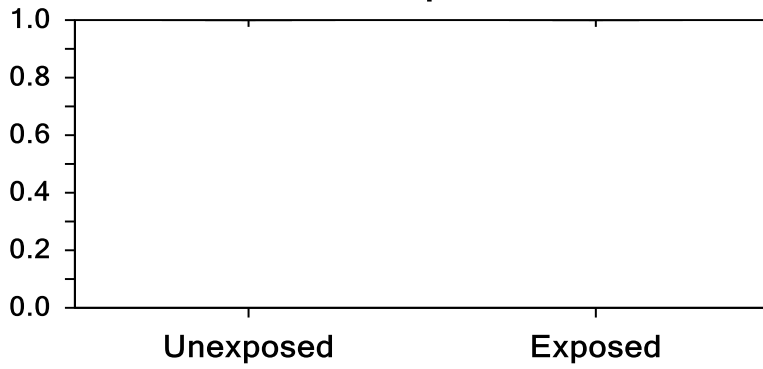

### venlafaxine

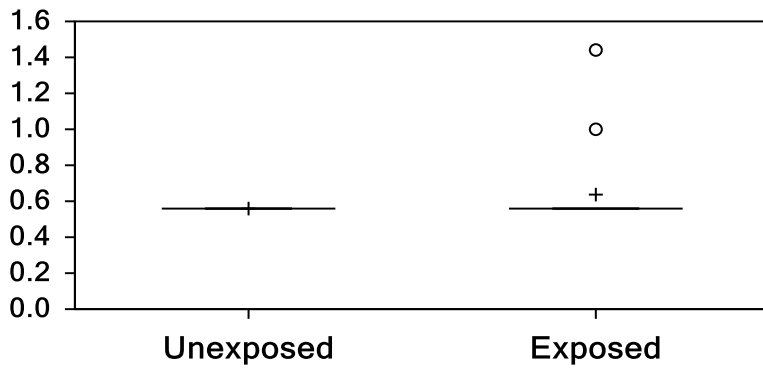

### phenylpropanolamine

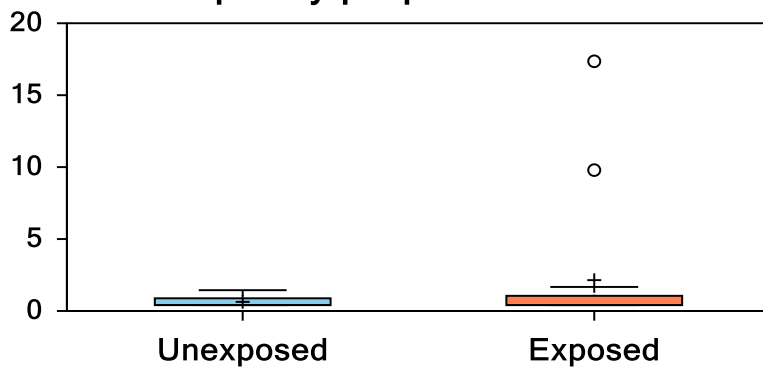

### aspartame

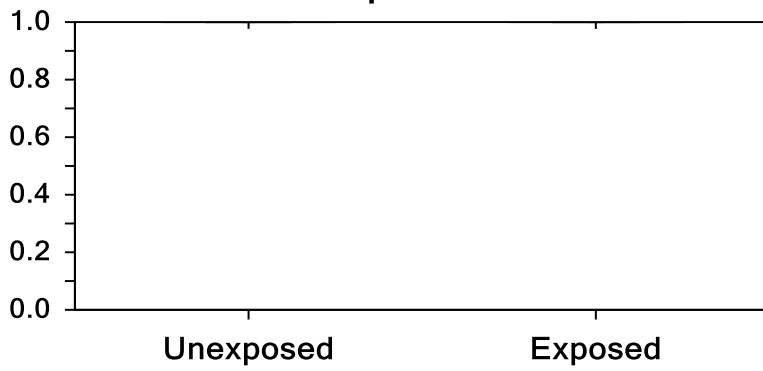

### 4-hydroxybenzyl alcohol

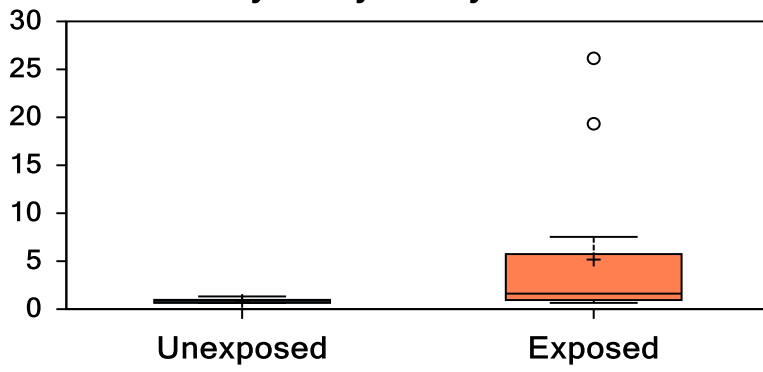

### thymol sulfate

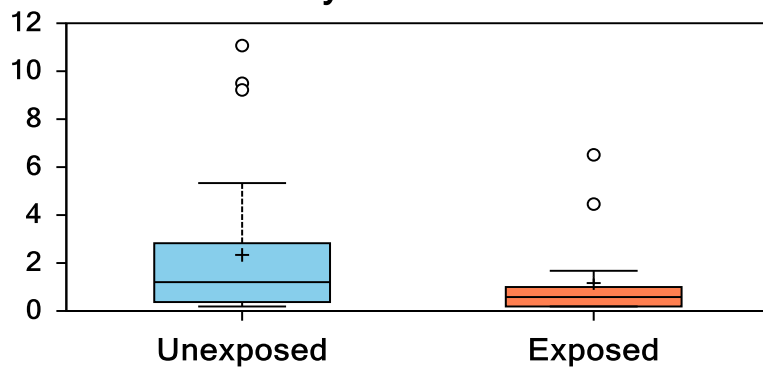

### cinnamate

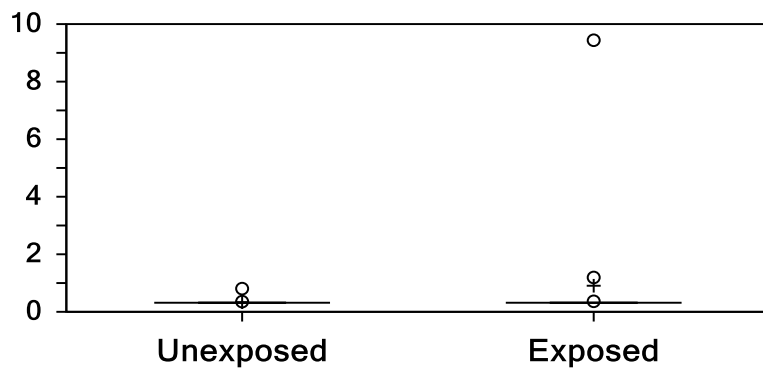

### 2-oxindole-3-acetate

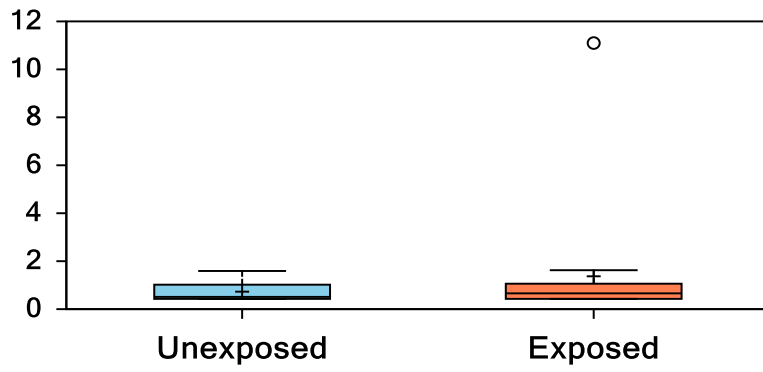

### 1H-quinolin-2-one

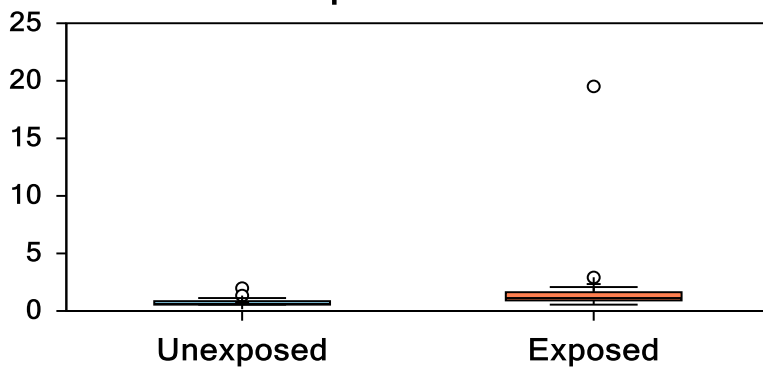

### paraxanthine

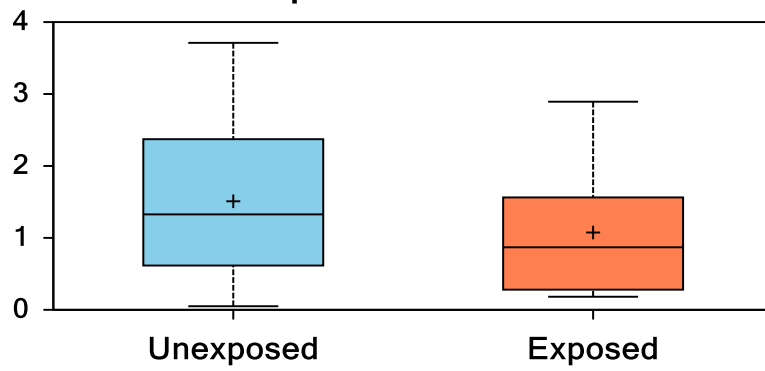



### 1-methylxanthine

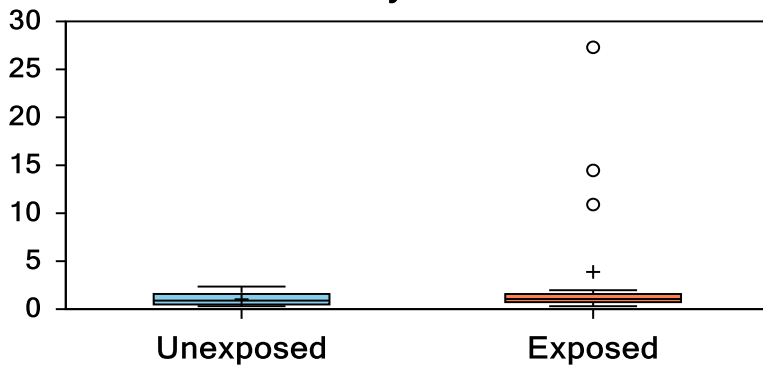

### cotinine

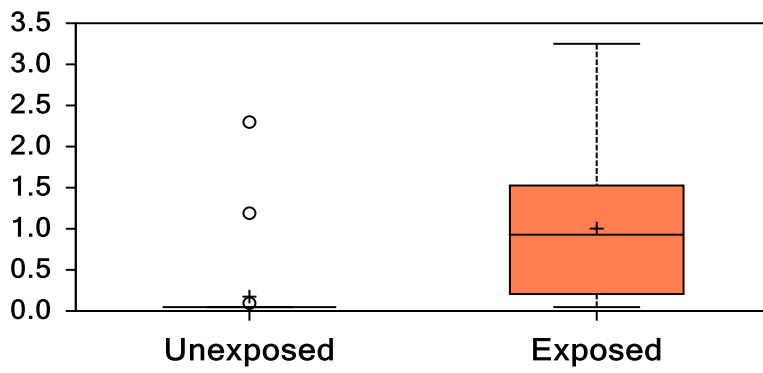

### erythritol

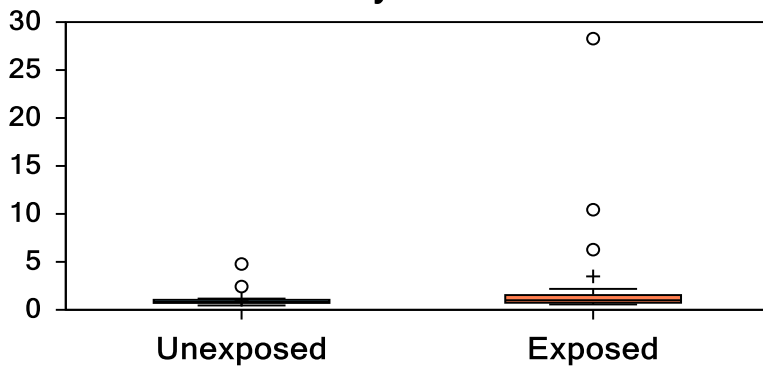

### phenolphthalein beta-D-glucuronide

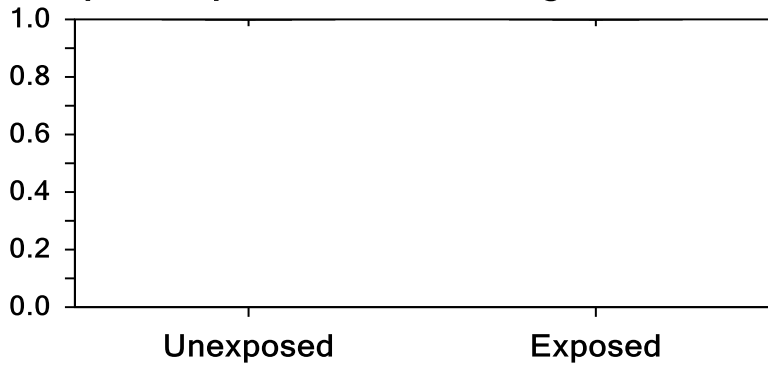

### X - 16123

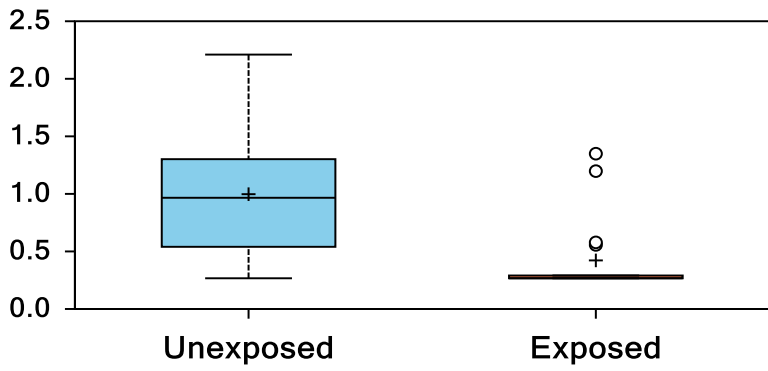

### X - 16117

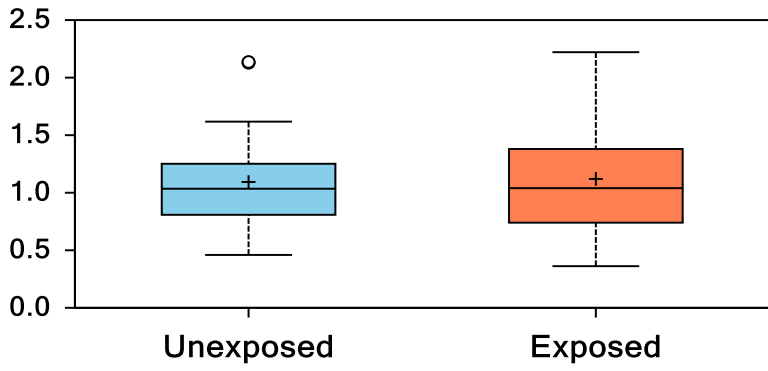

X - 16132

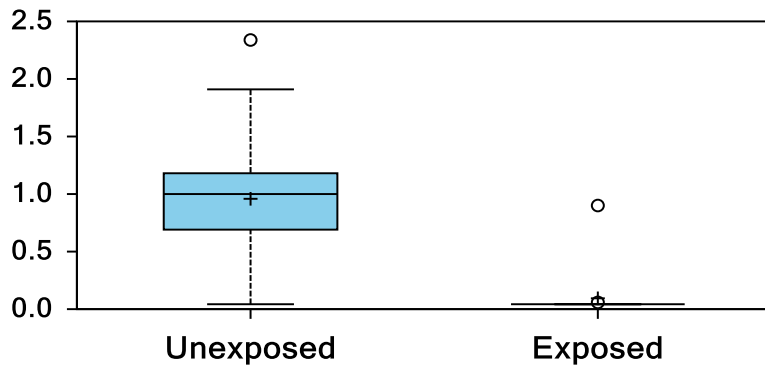

X - 16131

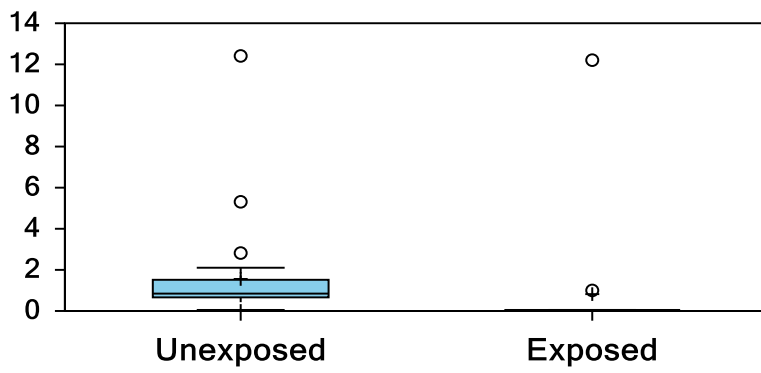

X - 16130

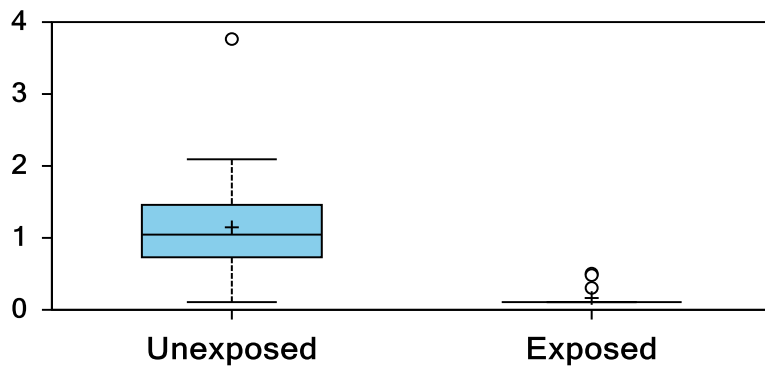

X - 15754

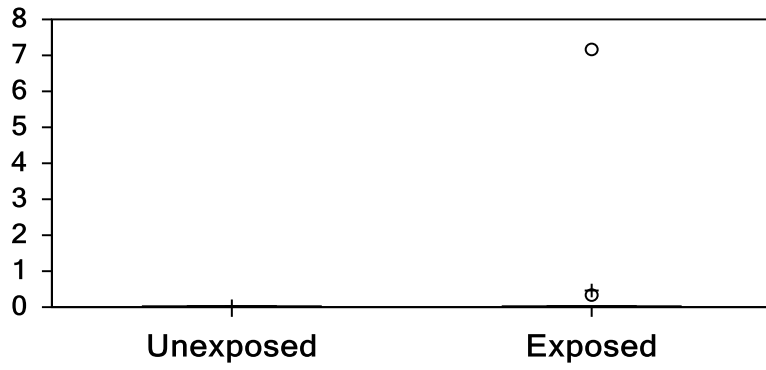

X - 15707



X - 16063

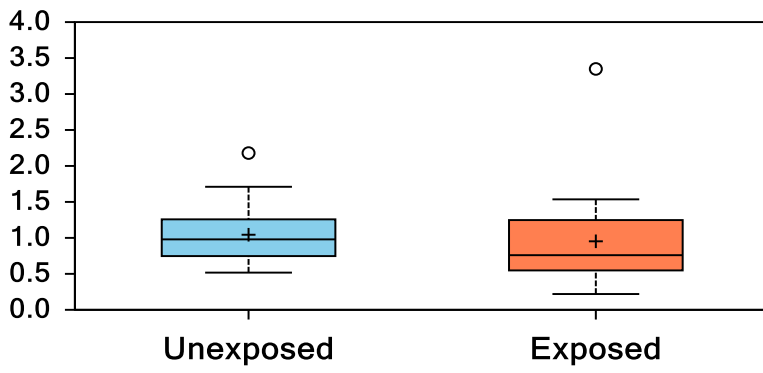

X - 16071

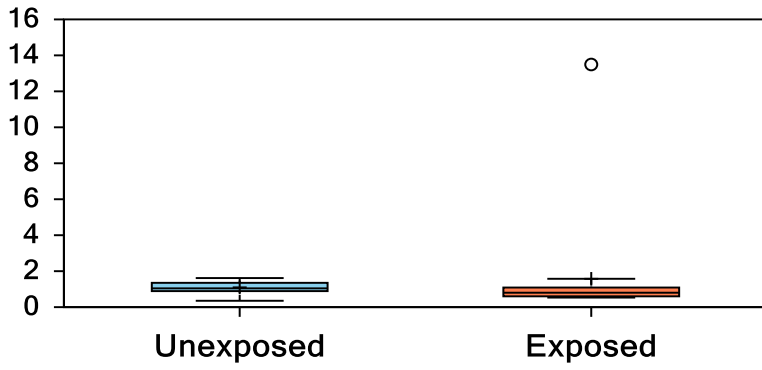

X - 15863

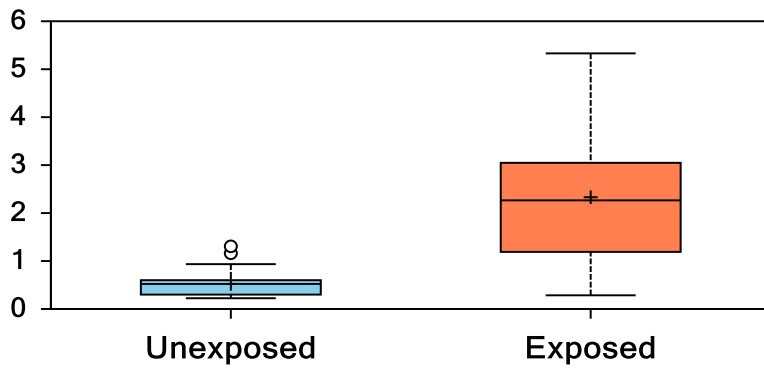

X - 16458

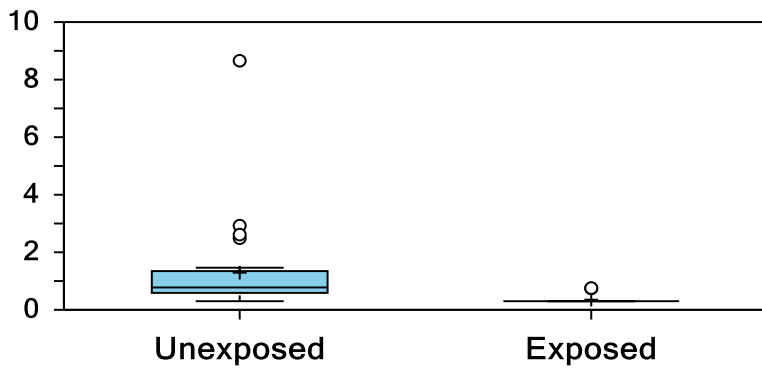

X - 16444

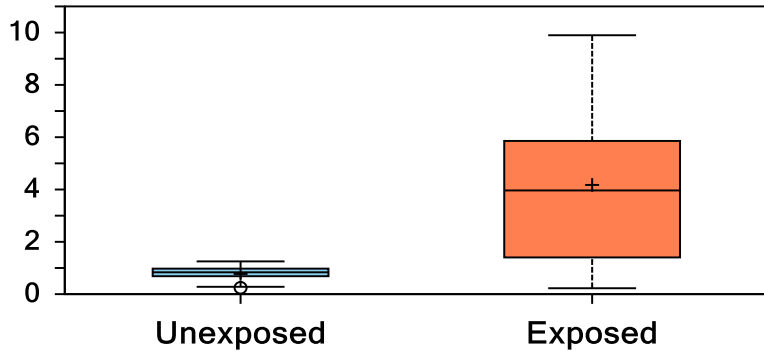

X - 16447

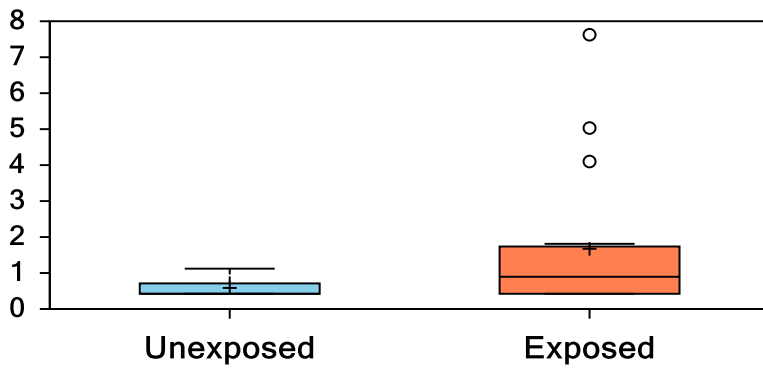

X - 16649

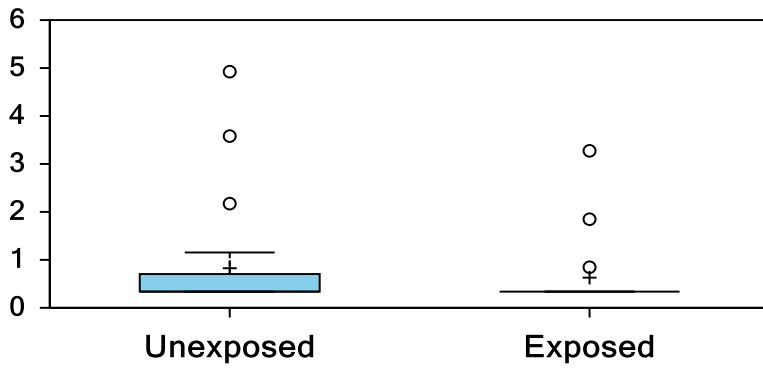

X - 16480

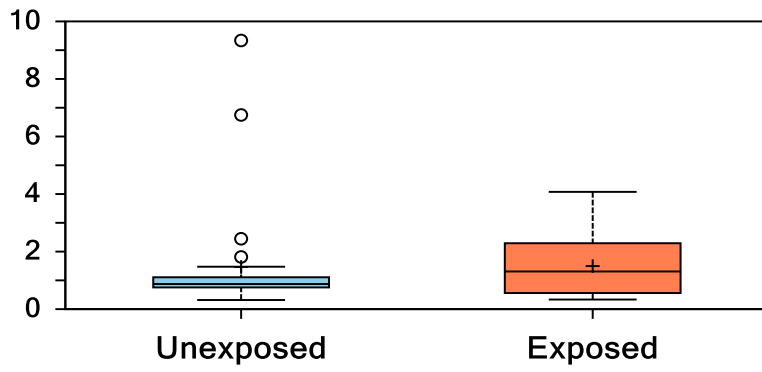

X - 16209

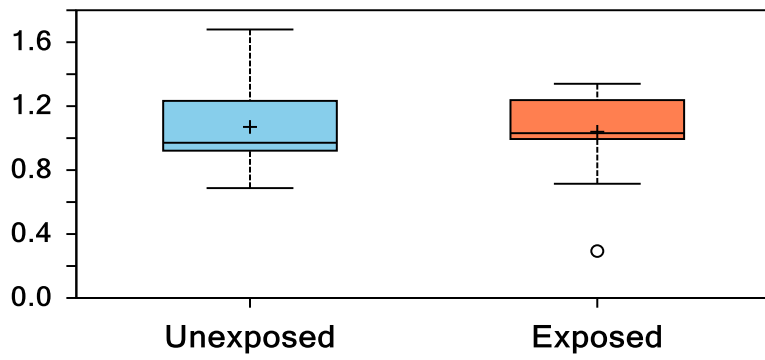

X - 16249

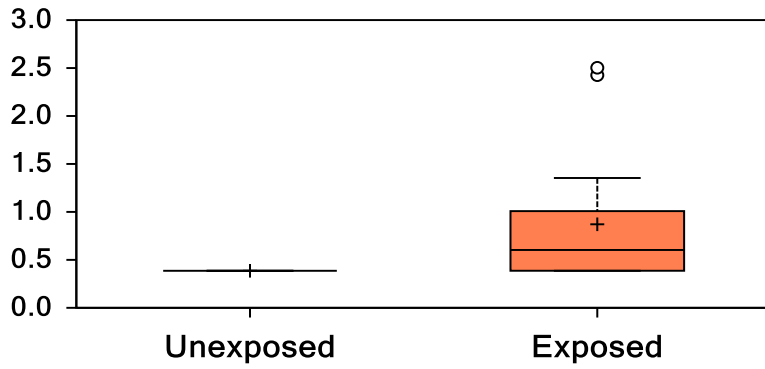

X - 16206

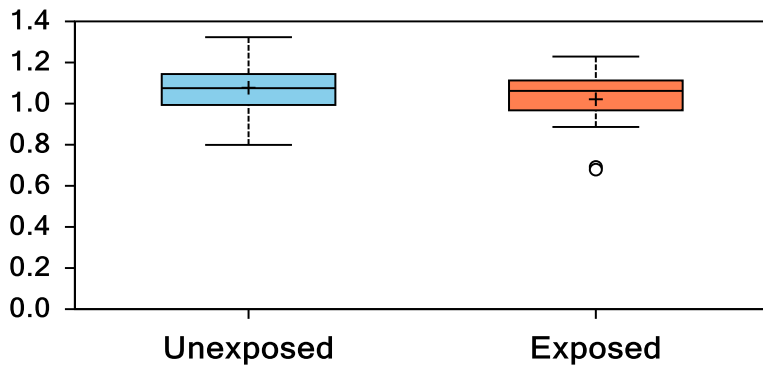

X - 16336

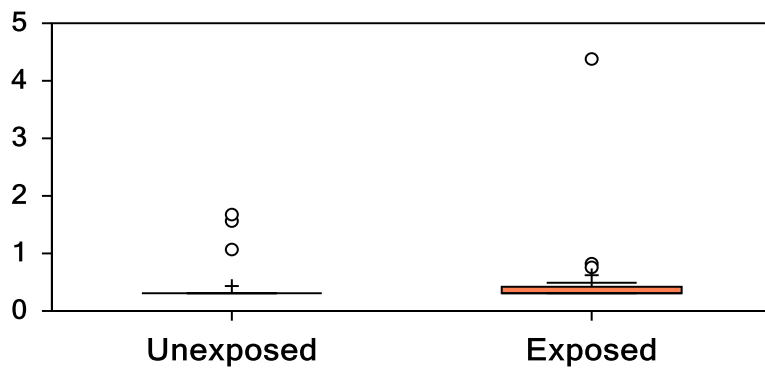

X - 16299

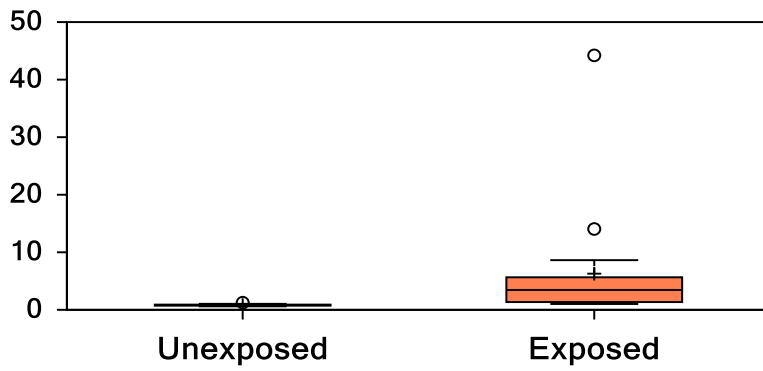



X - 16300

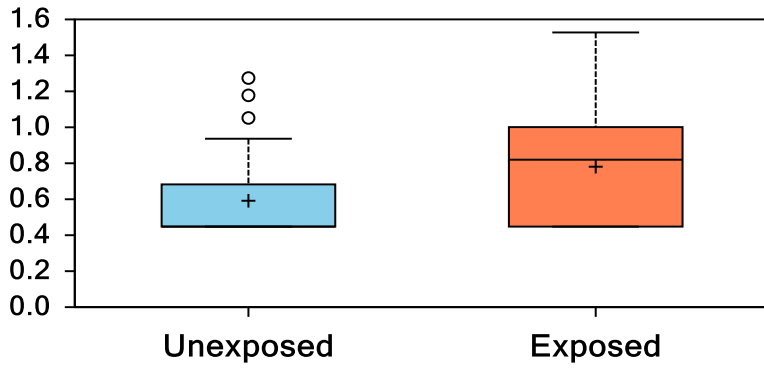

X - 14445

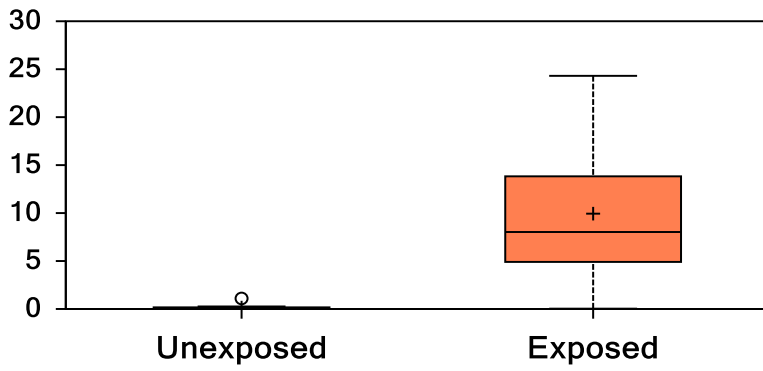

X - 14374

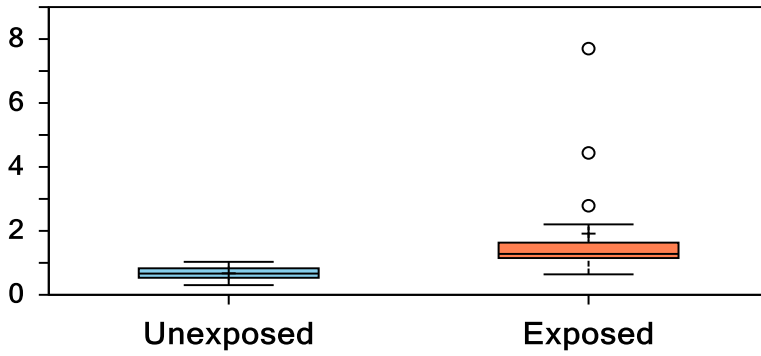

X - 14411

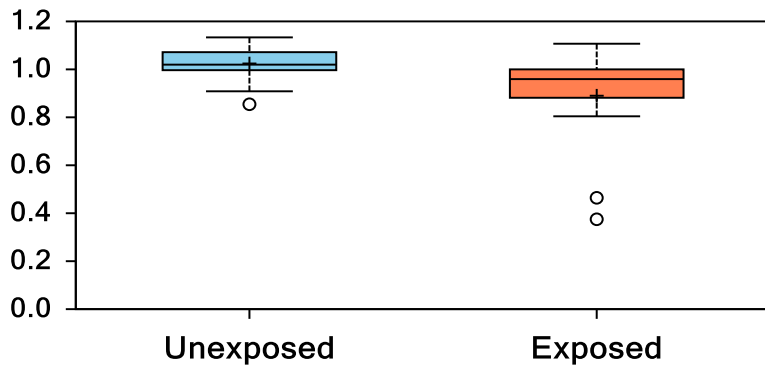

X - 14658

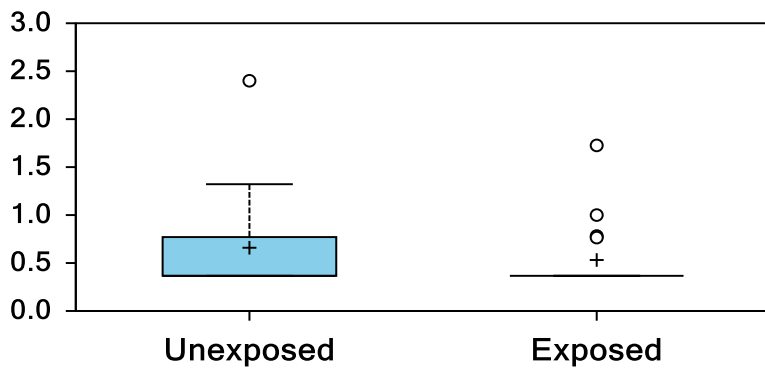

X - 14497

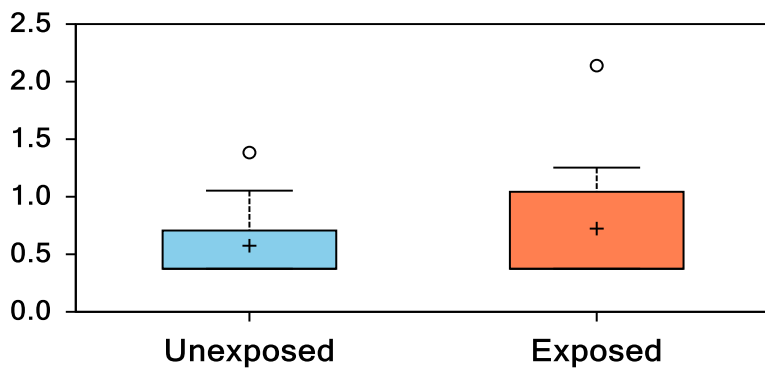

X - 14216

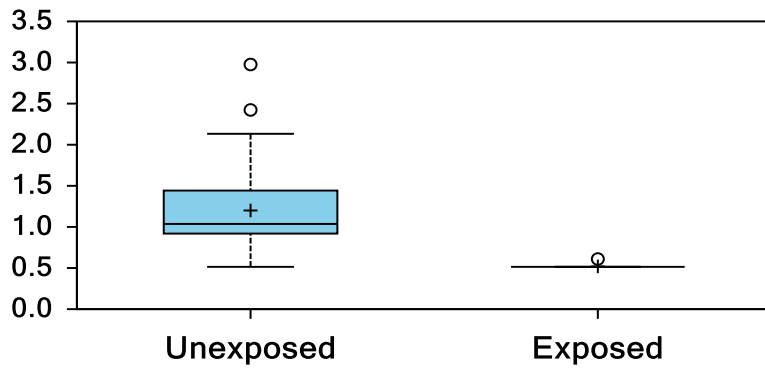

X - 14234

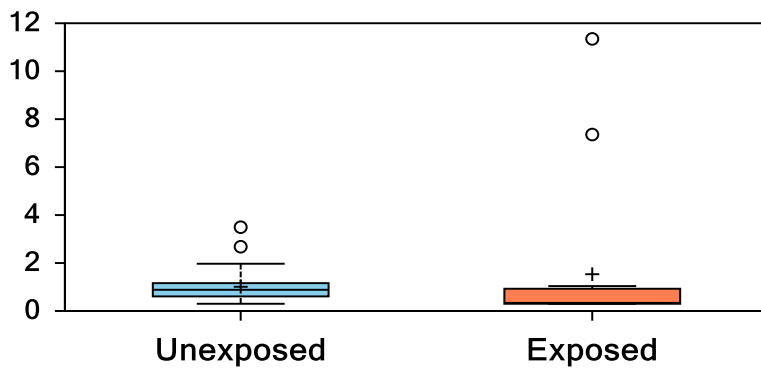

X - 14203

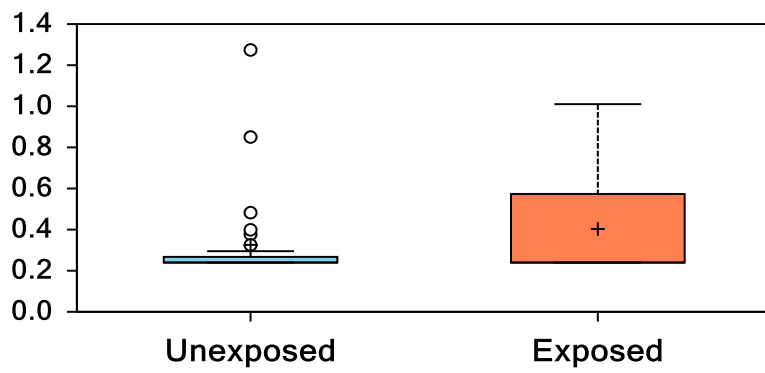

X - 14314

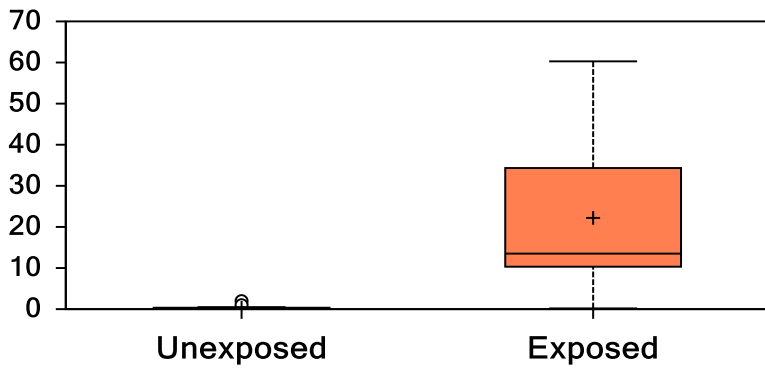

X - 14272

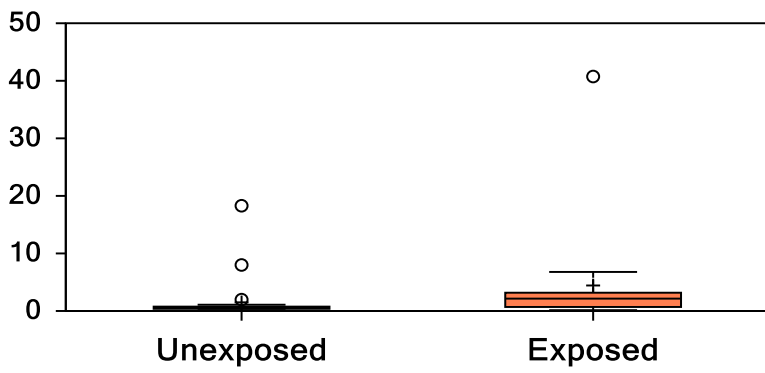

X - 14277

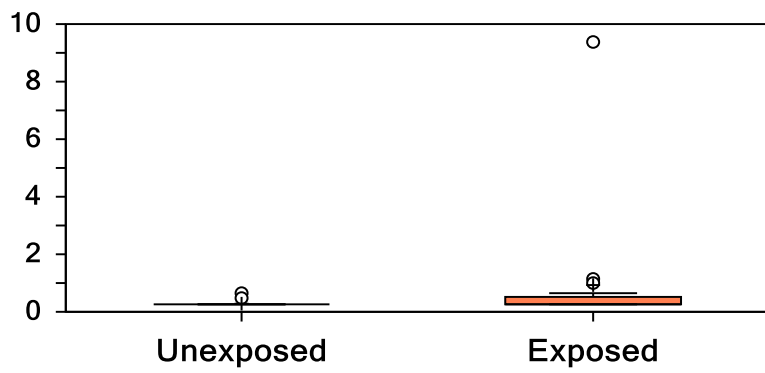

X - 15563

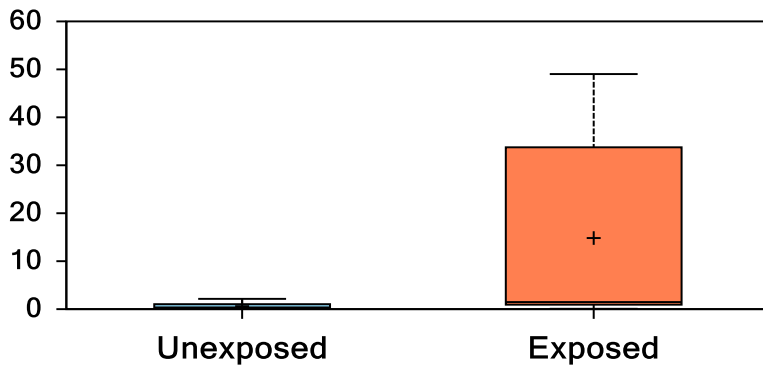

X - 15484

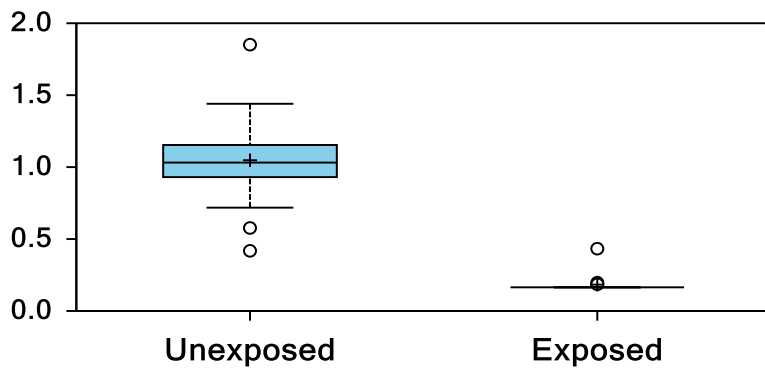

X - 15667

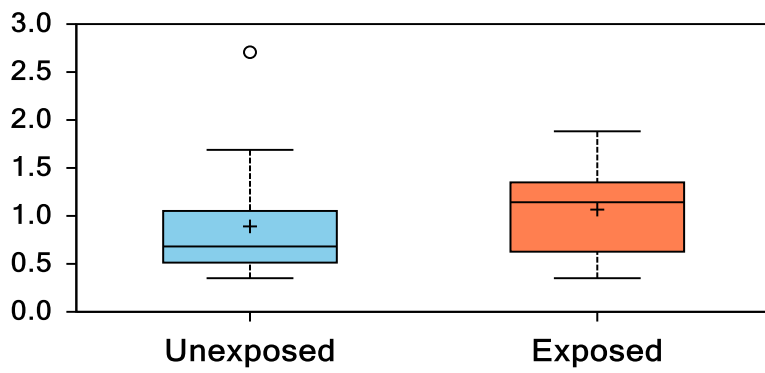

X - 15678

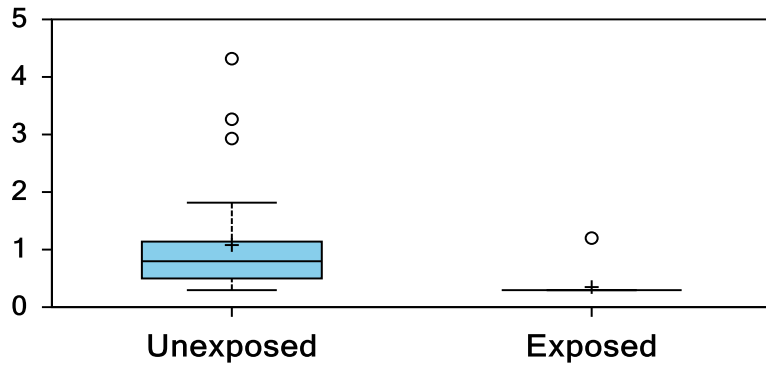

X - 15650

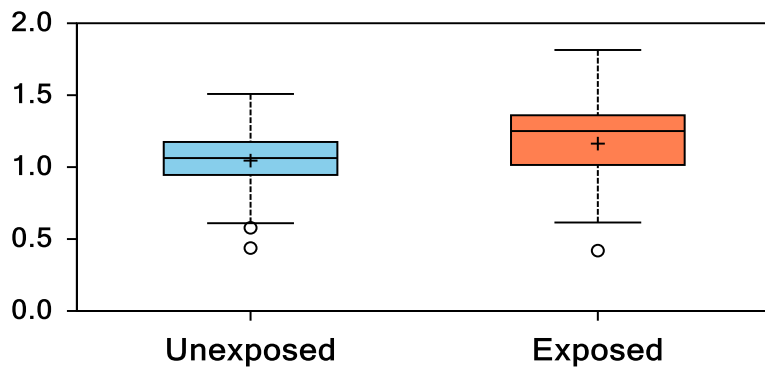

X - 14908

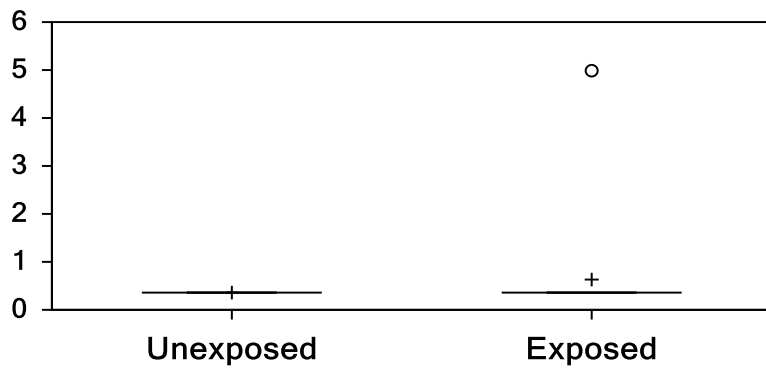

X - 14663

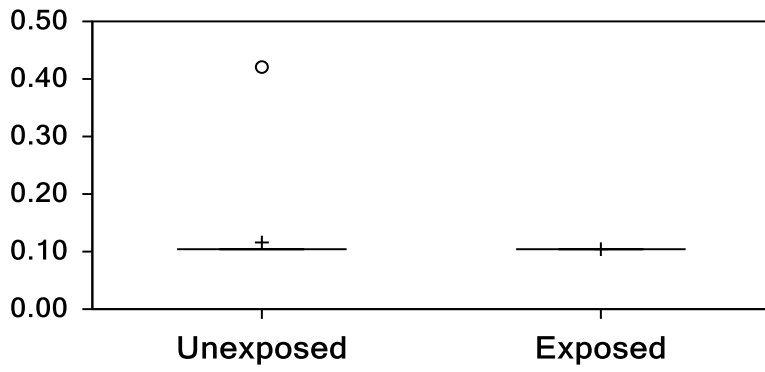

X - 14808

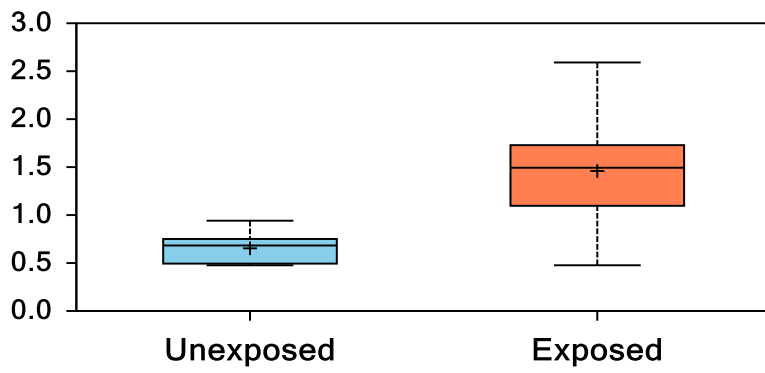

X - 15483

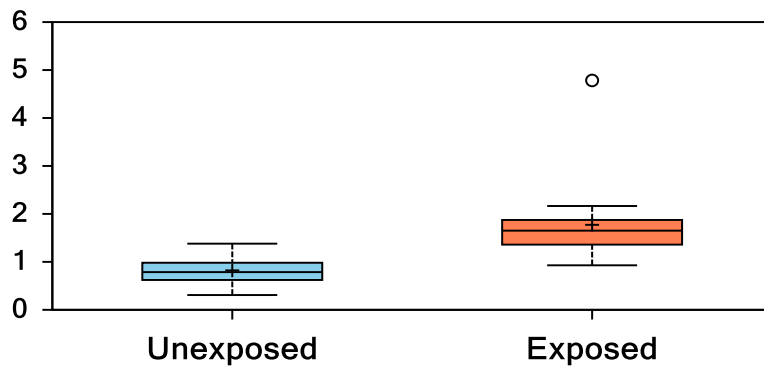

X - 15169

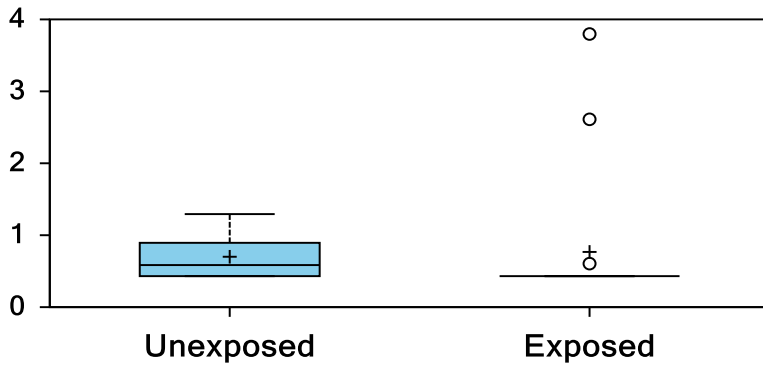

X - 17459

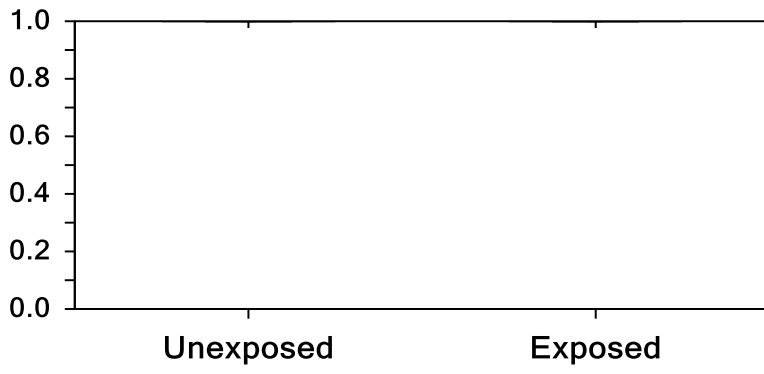

X - 17462

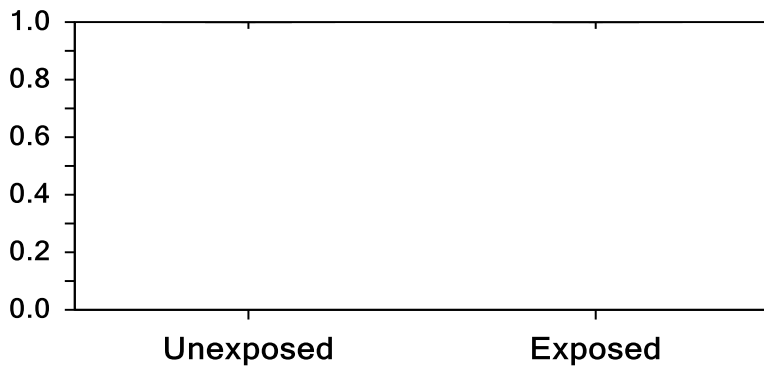



X - 17453

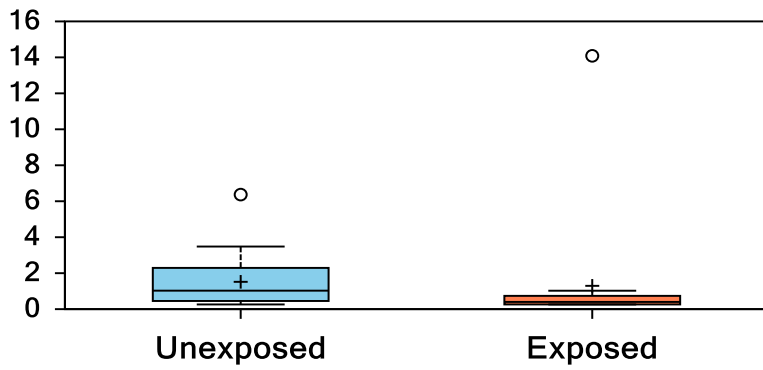

X - 17629

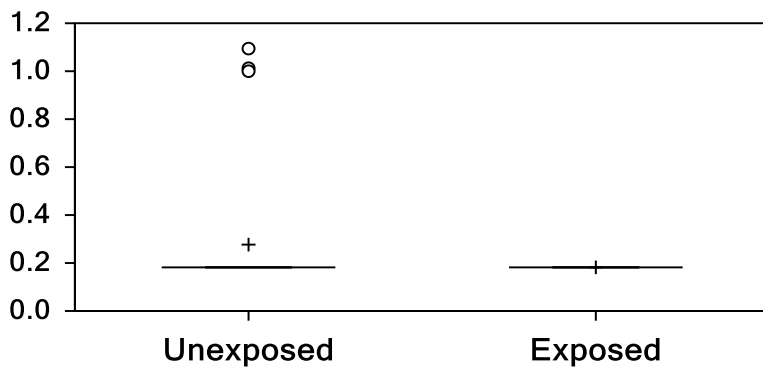

X - 17531

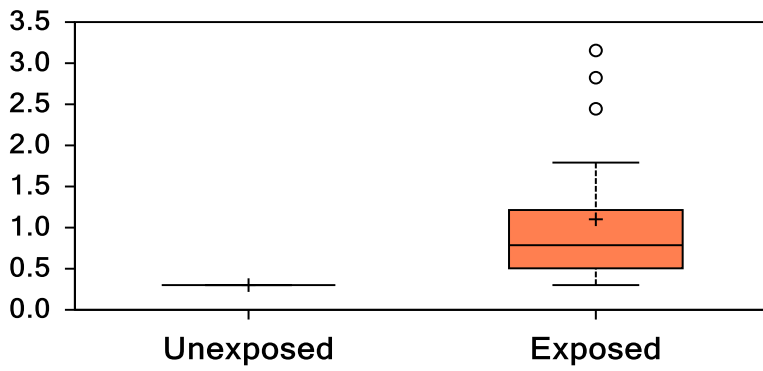

X - 17543

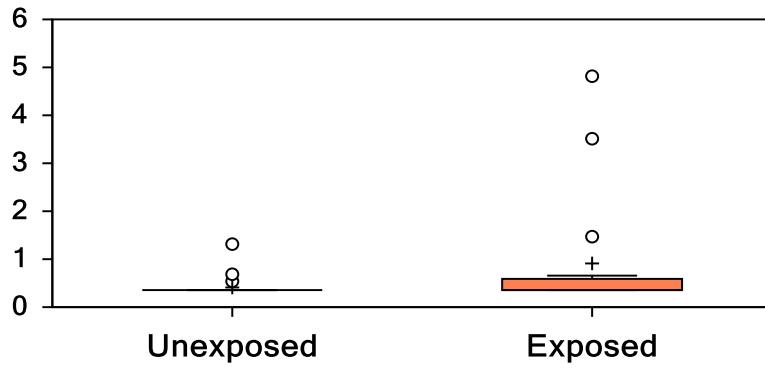

X - 17352

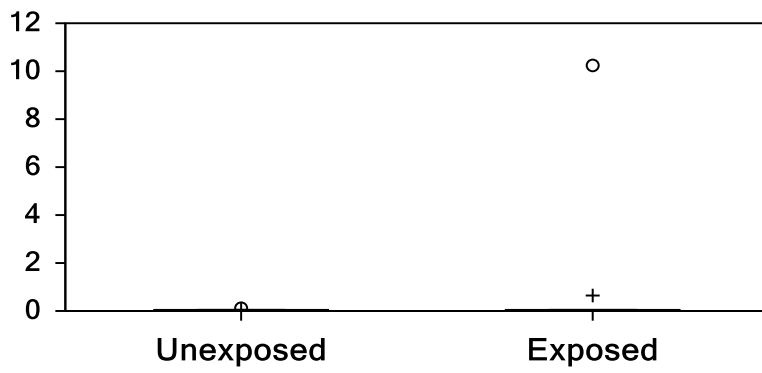

X - 17340

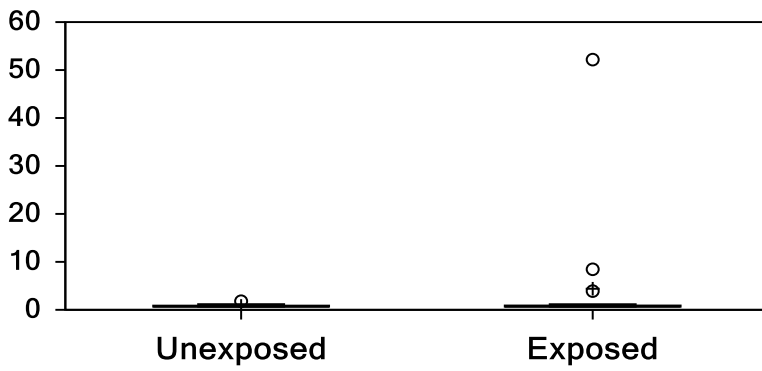

X - 17367

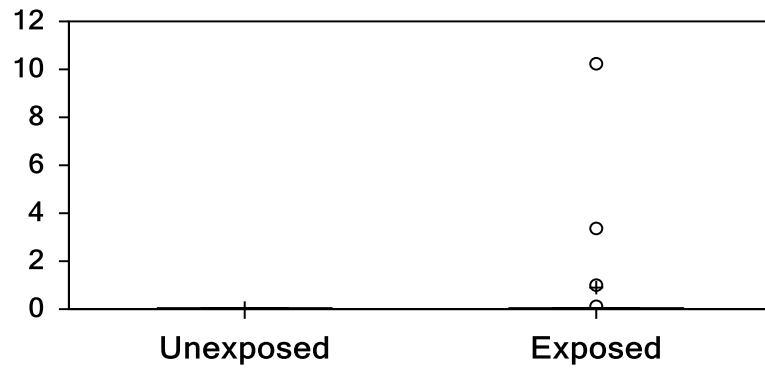

X - 17368

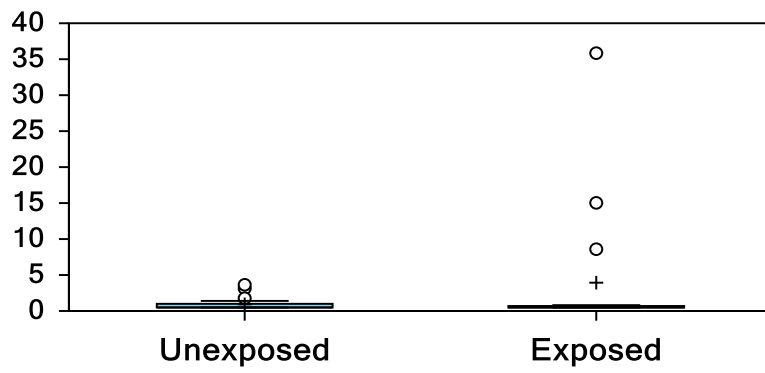

X - 17359

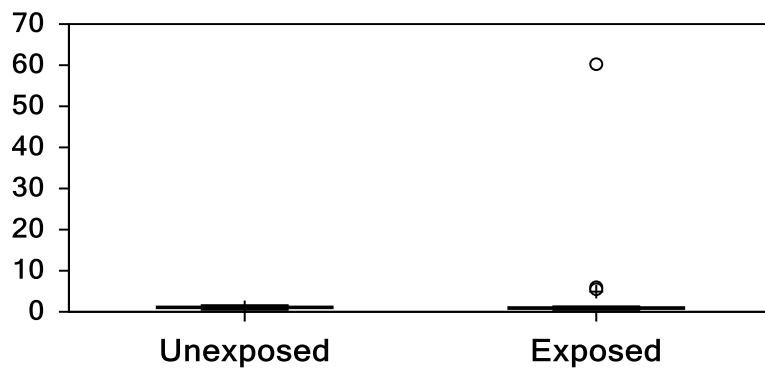

X - 17869

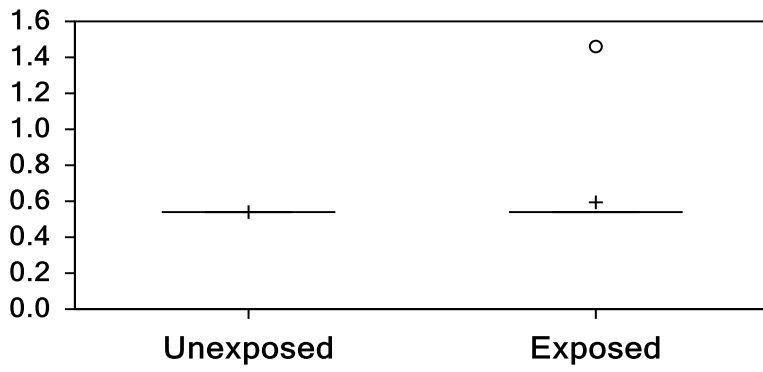

X - 17801

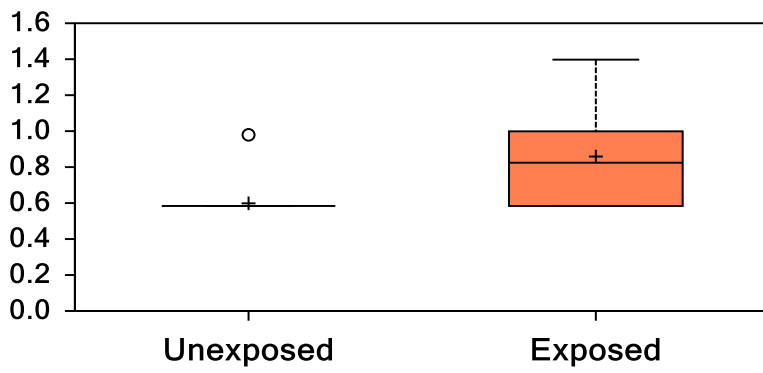

X - 17825

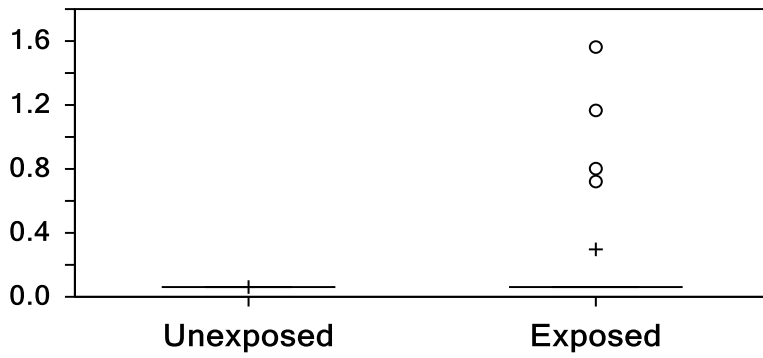

X - 12096

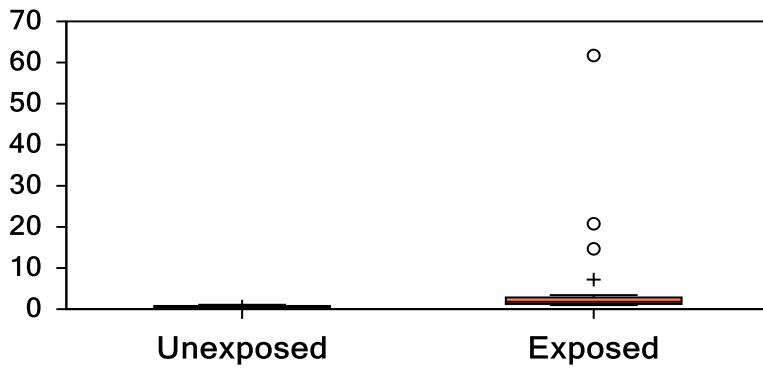

X - 18059

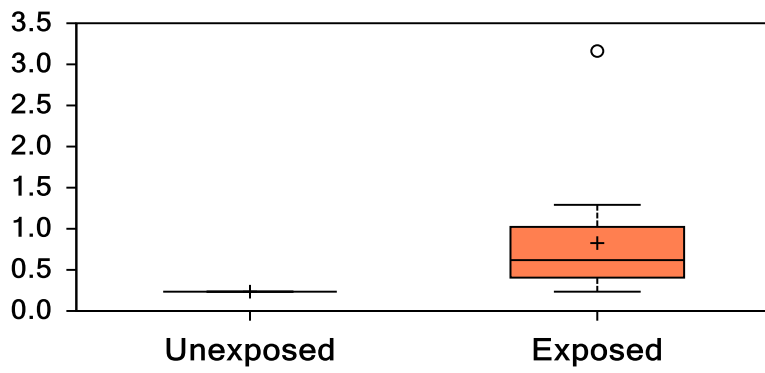

X - 17690

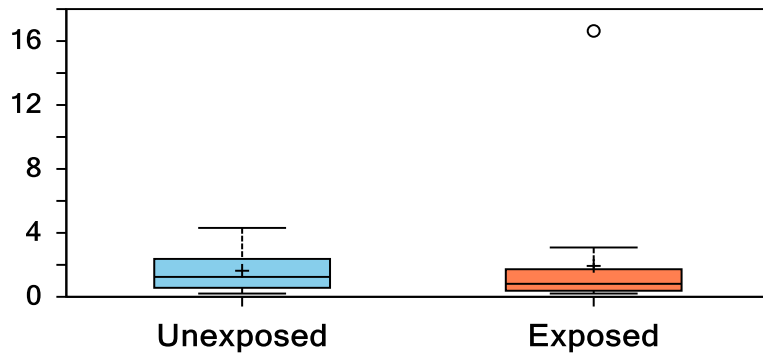

X - 17692

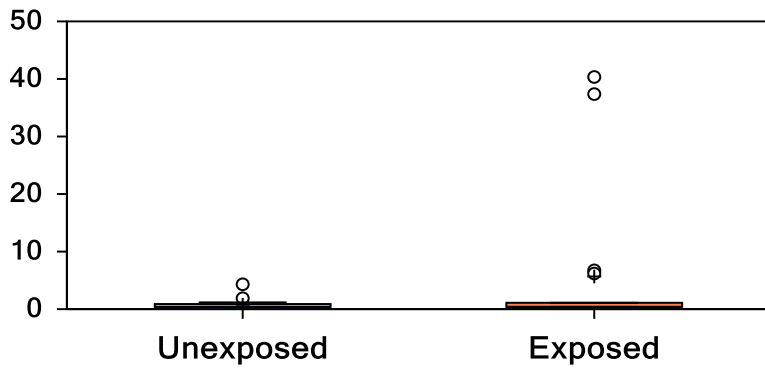

X - 17686

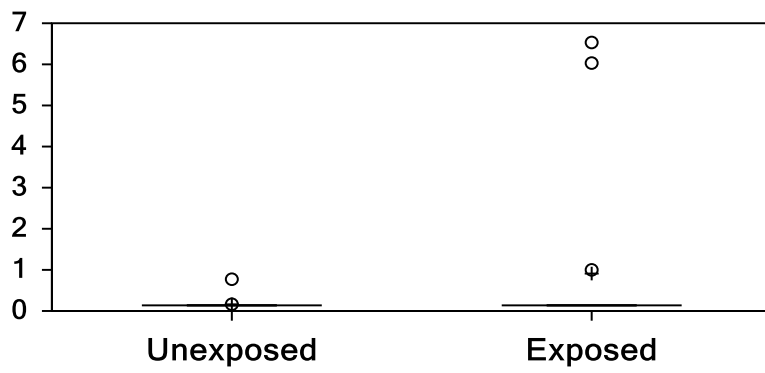

X - 17717

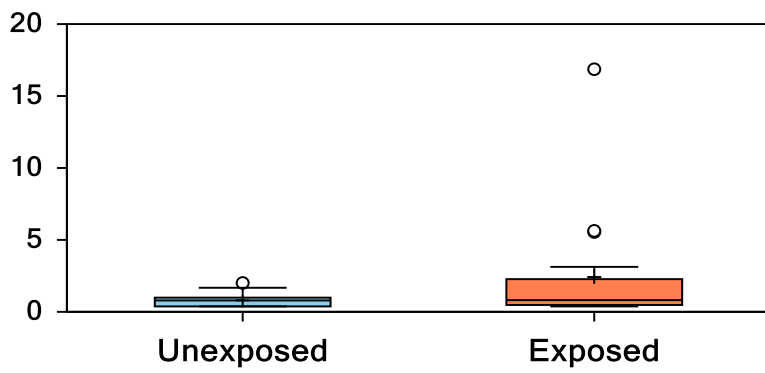

X - 17705

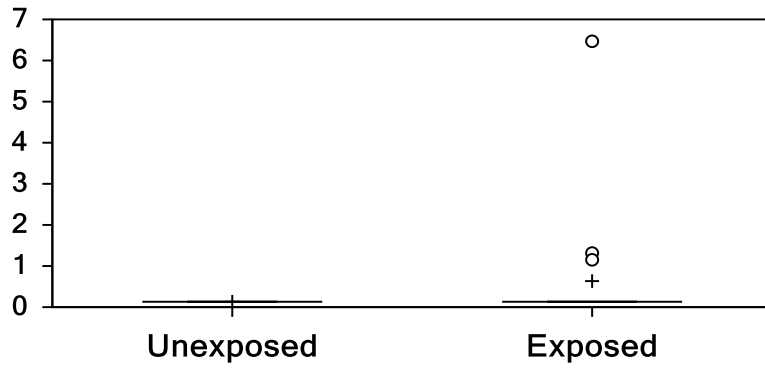

X - 17706

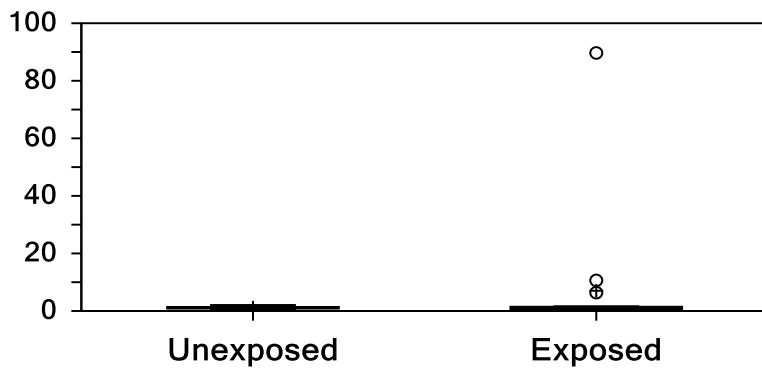

X - 17115

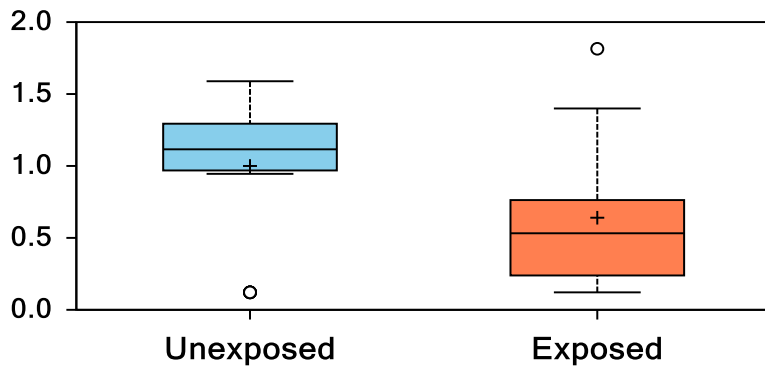

X - 16947

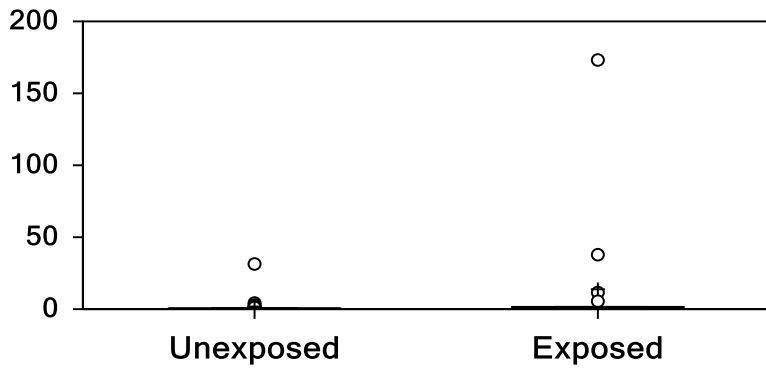

X - 17150

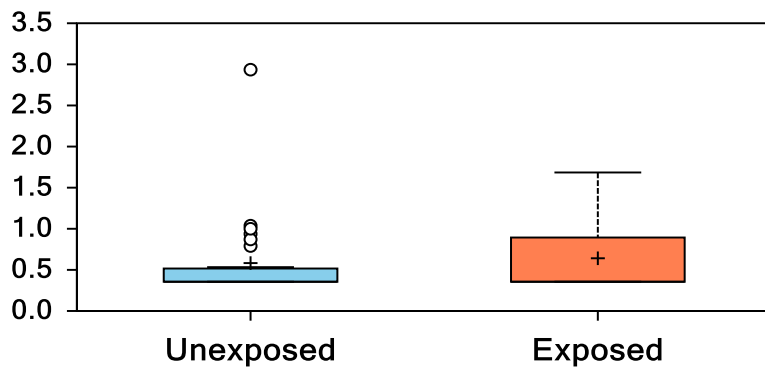

X - 17151

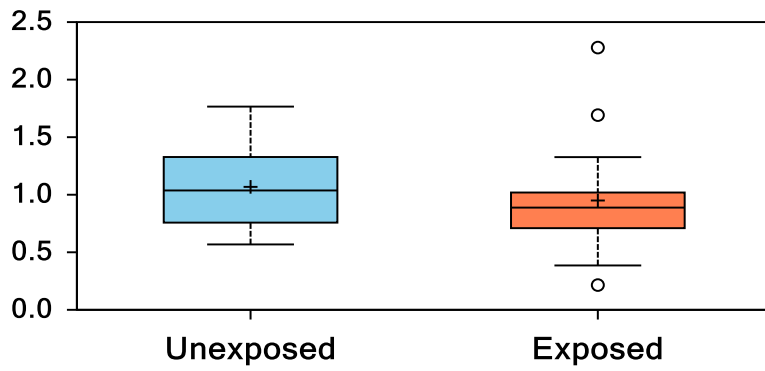



X - 17146

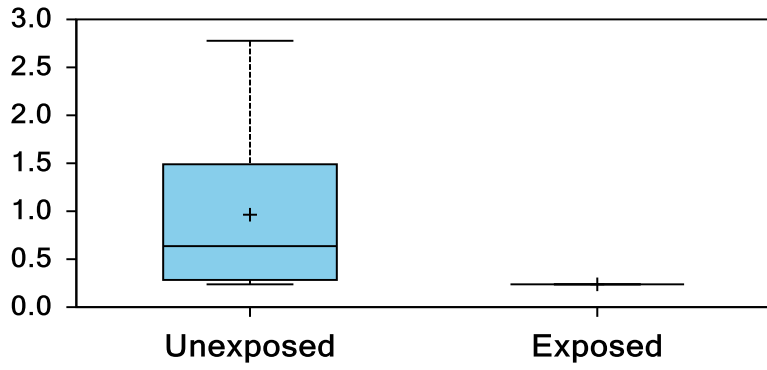

X - 16786

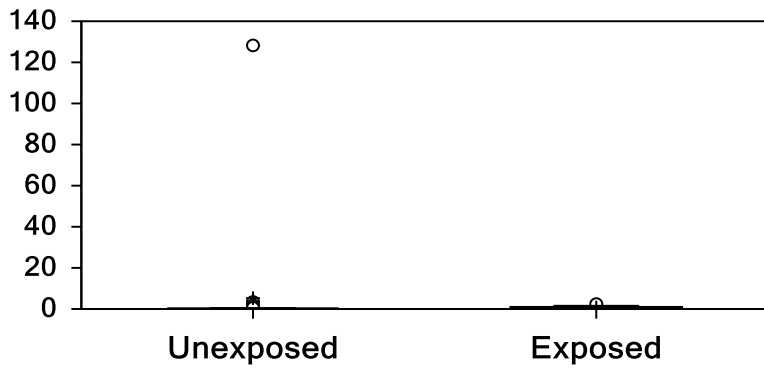

X - 16653

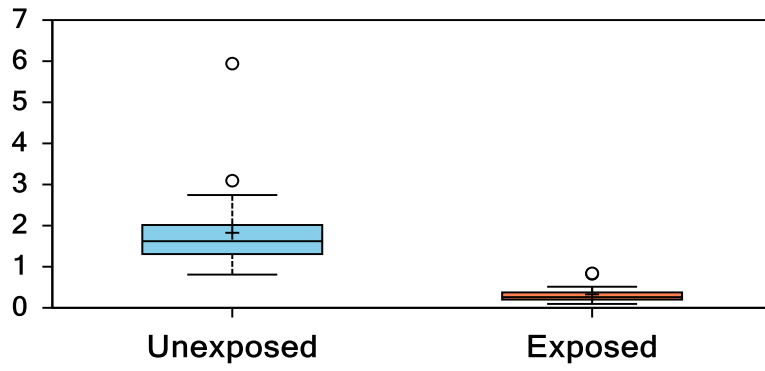

X - 16654

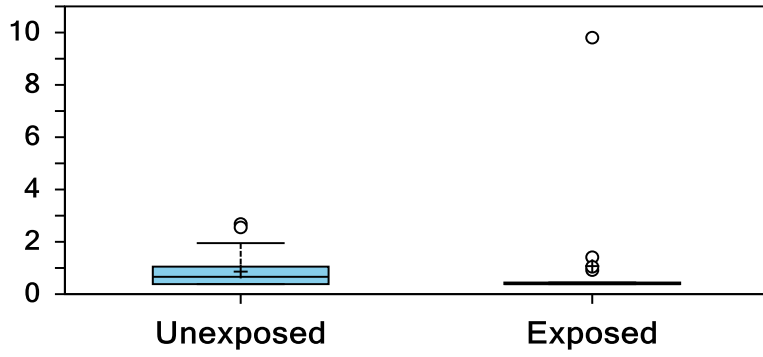

X - 16946

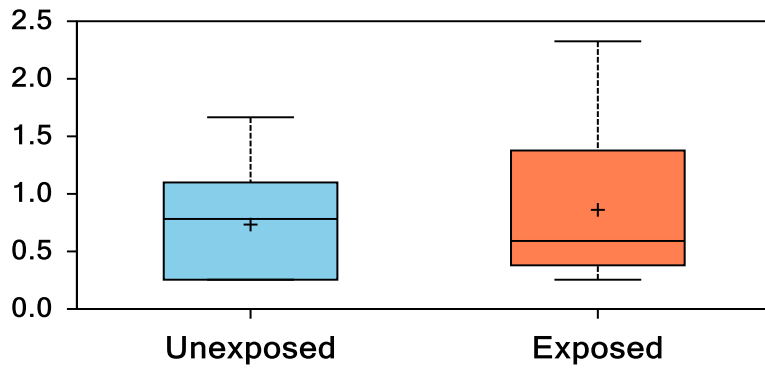

X - 16934

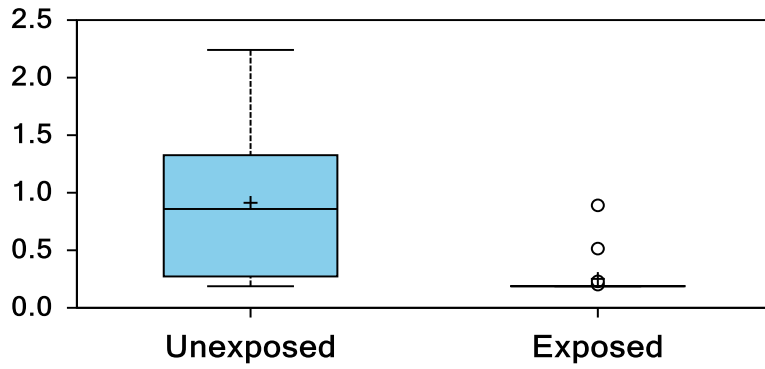

X - 17324

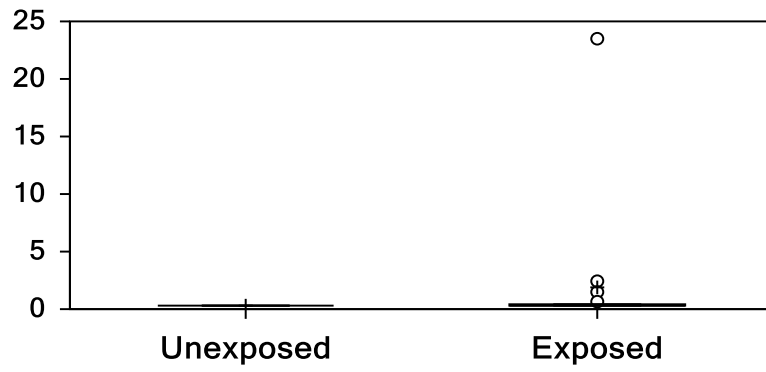

X - 17325

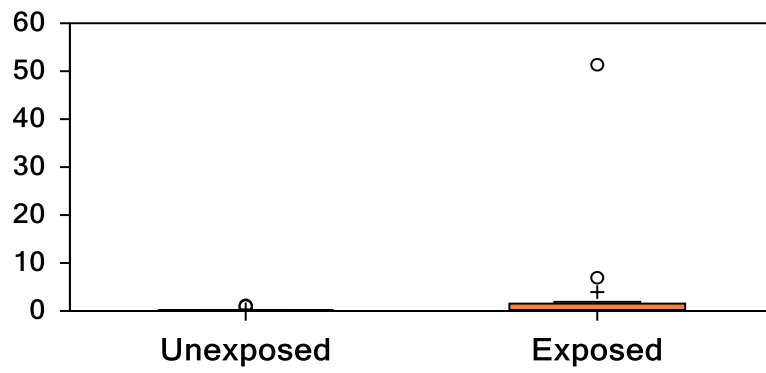

X - 17320

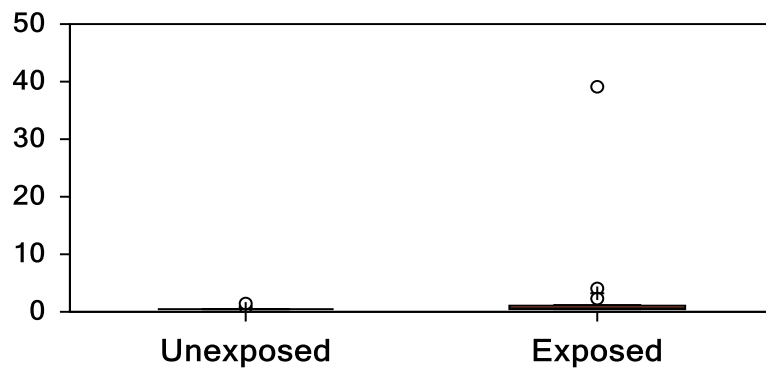

X - 17335

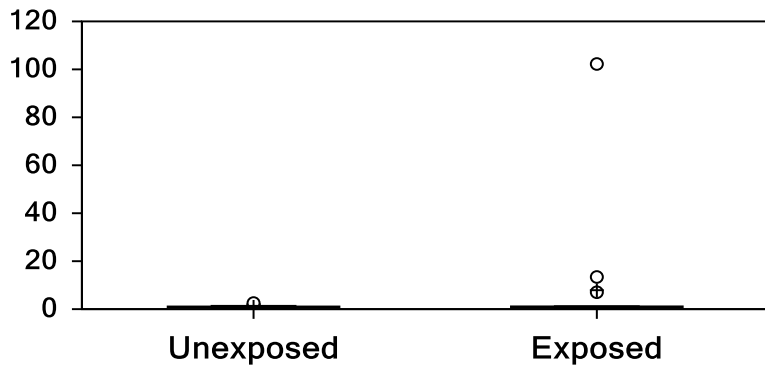

X - 17328

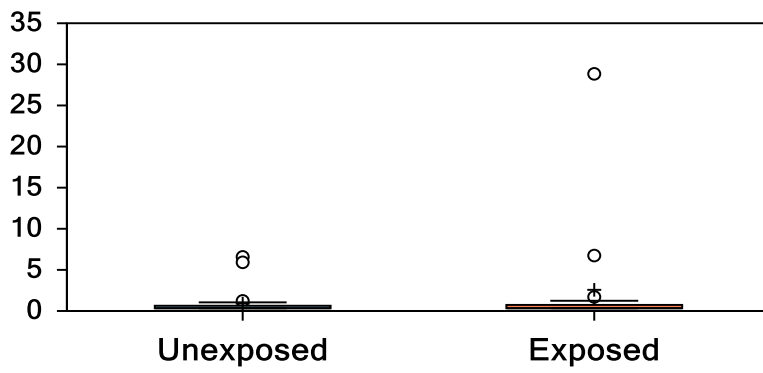

X - 17330

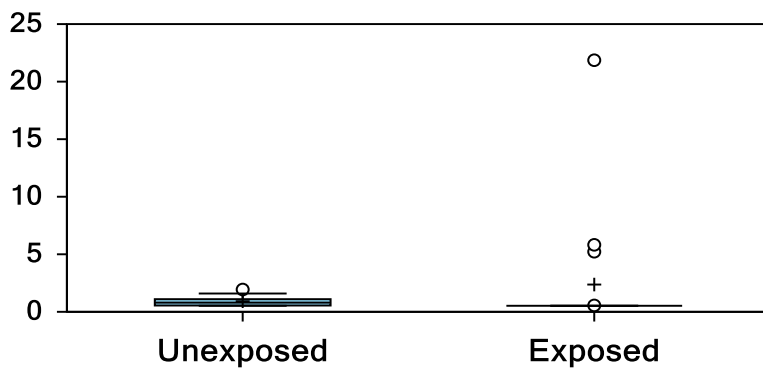

X - 17193

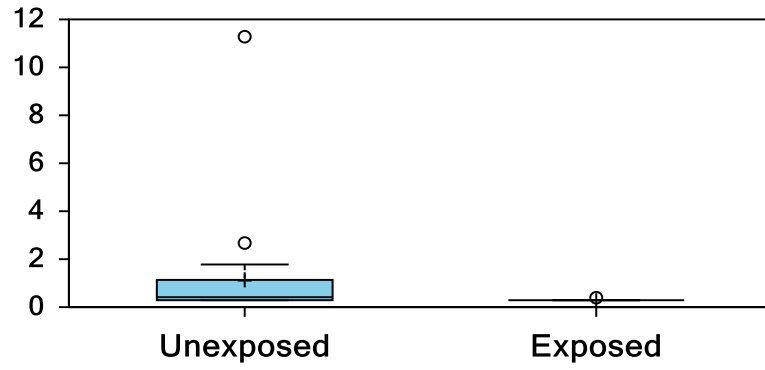

X - 17162

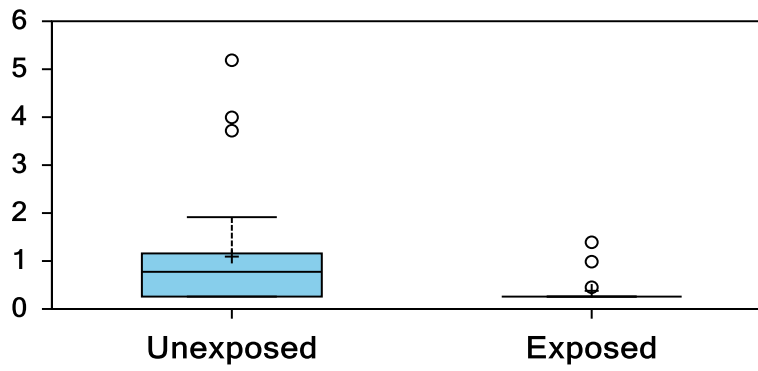

X - 17305

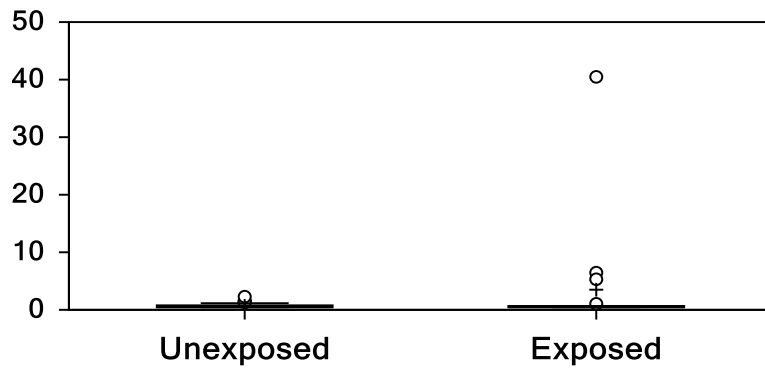

X - 17306

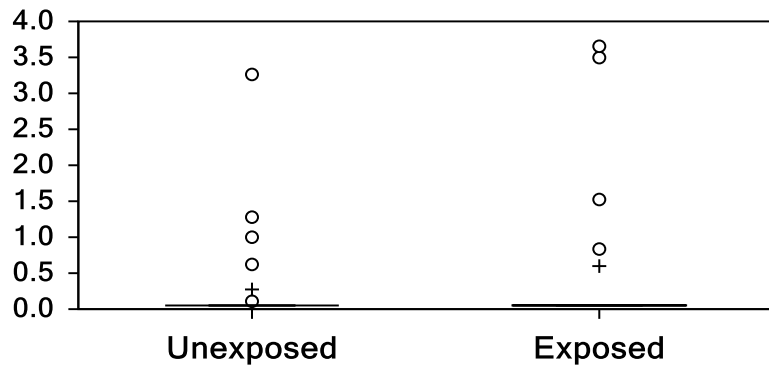

X - 17301

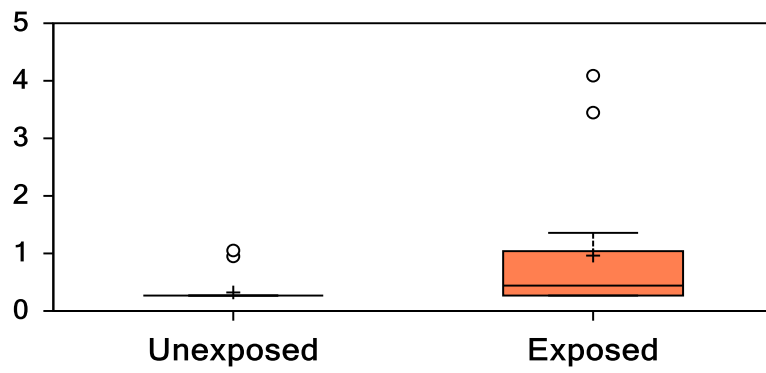

X - 11949

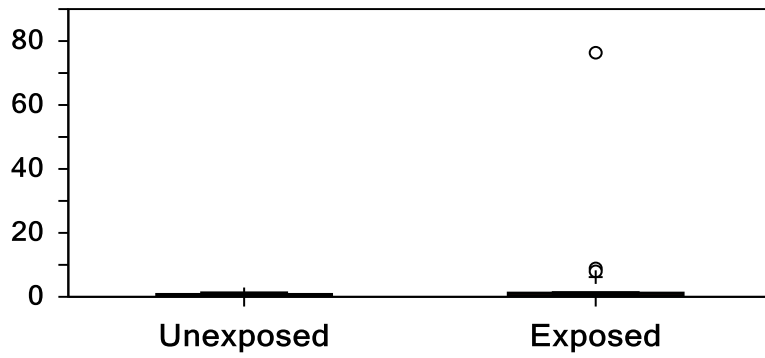

X - 11880

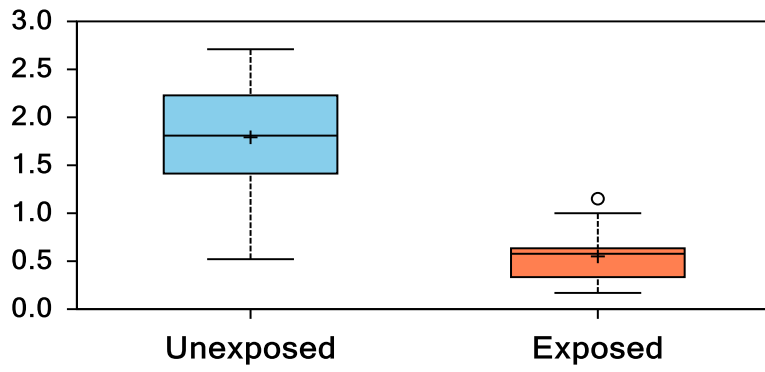

X - 11905

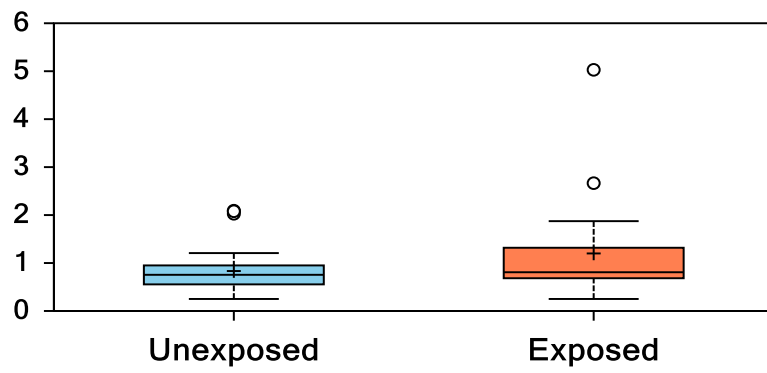

X - 12095

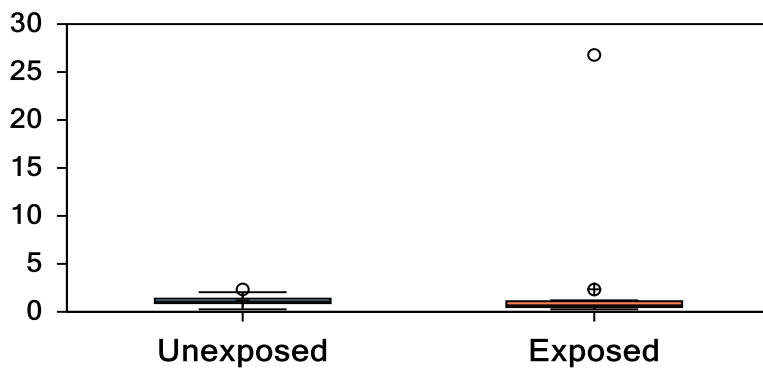

X - 12039

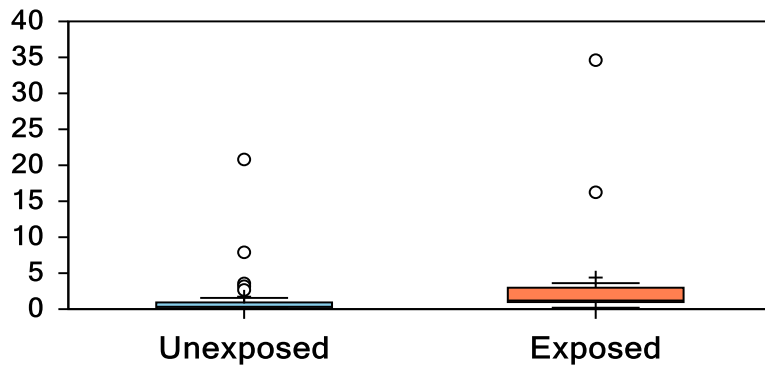

X - 11837

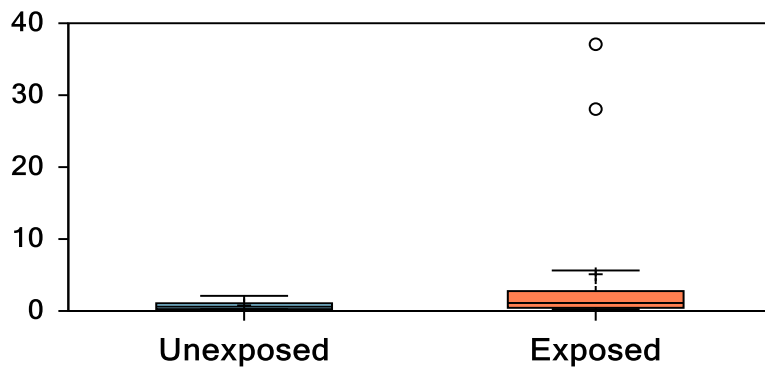

X - 11838

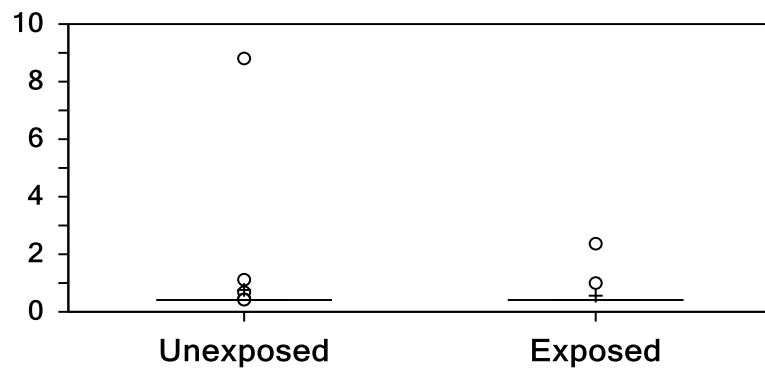



X - 11820

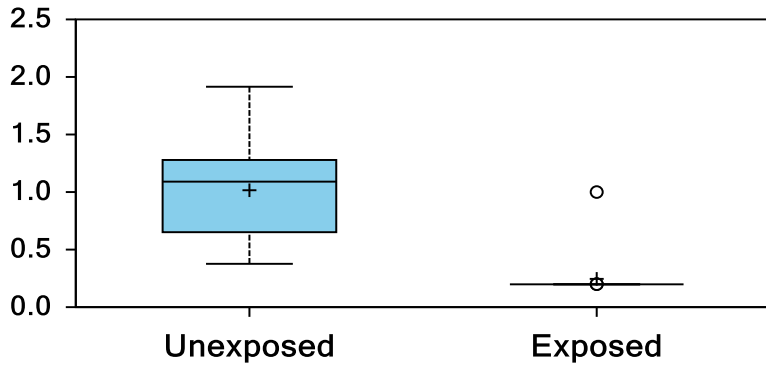

X - 11852

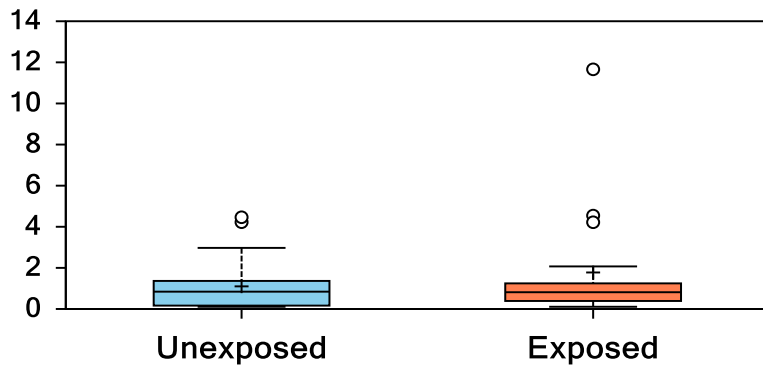

X - 11847

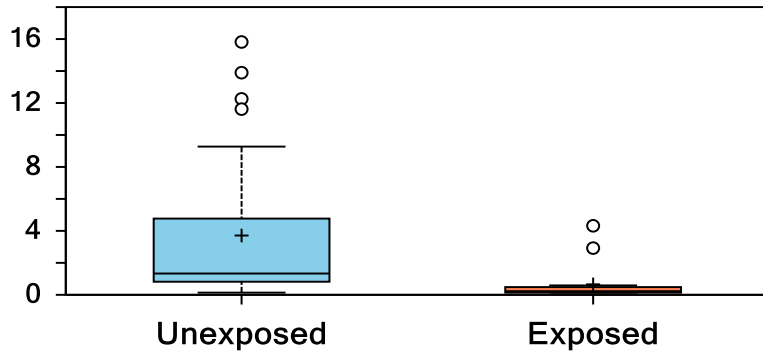

X - 11849

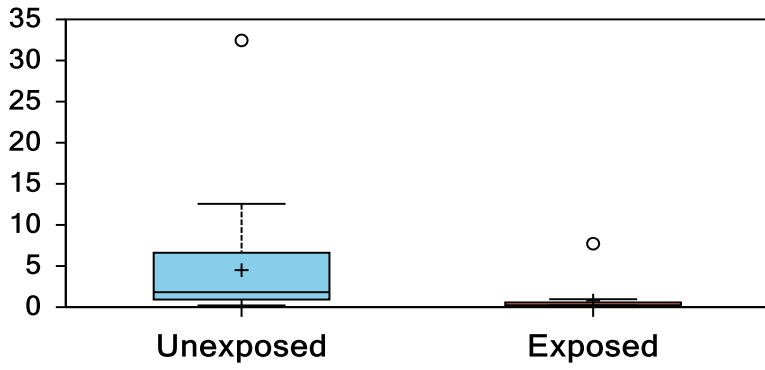

X - 12205

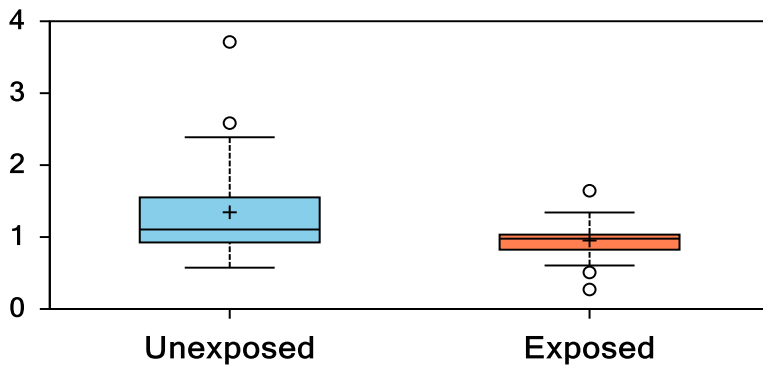

X - 12189

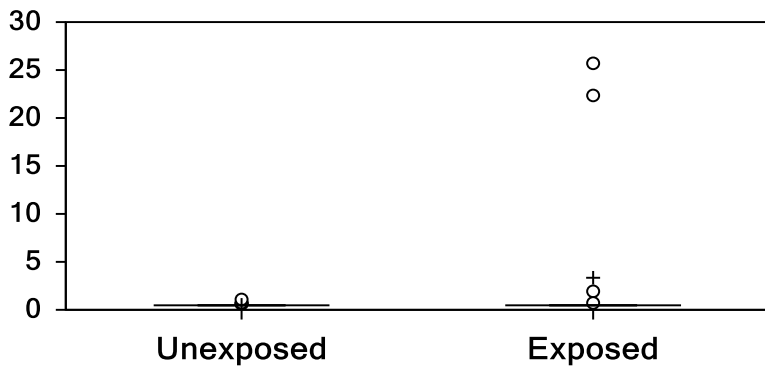

X - 12193

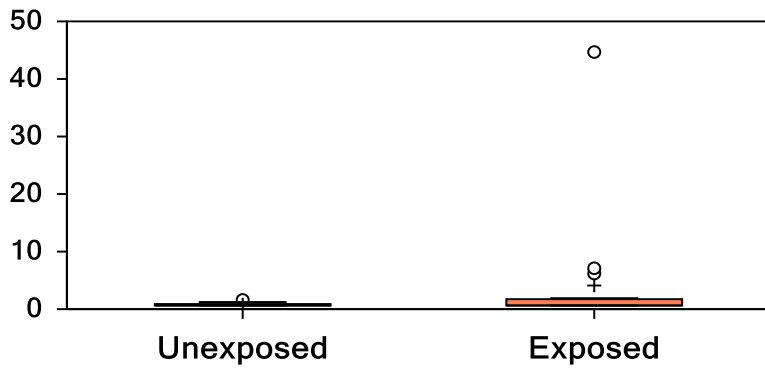

X - 12267

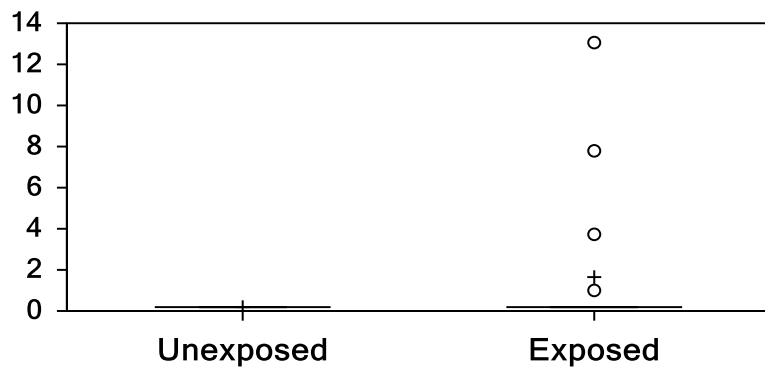

X - 12230

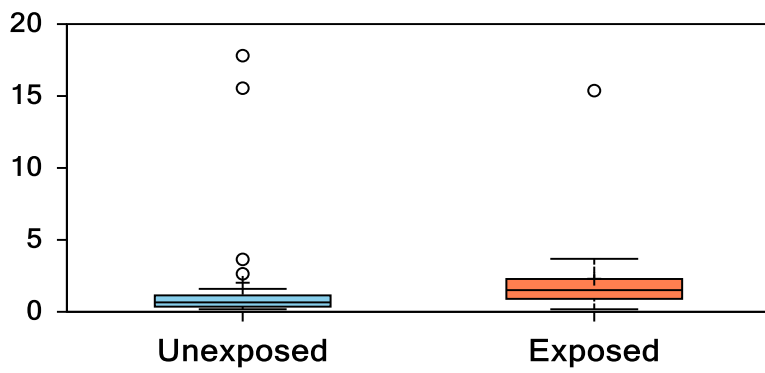

X - 12115

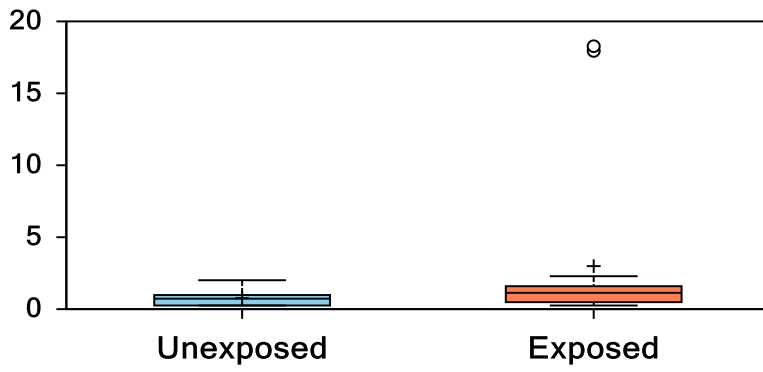

X - 12116

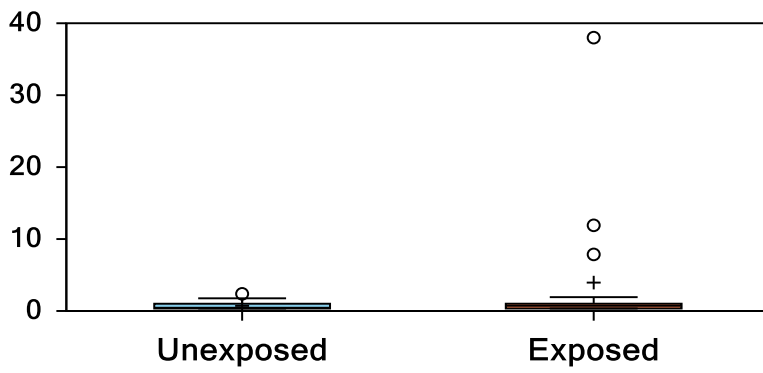

X - 12107

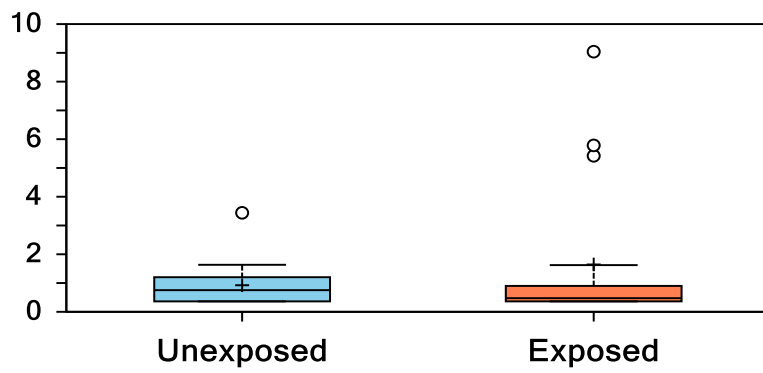

X - 12128

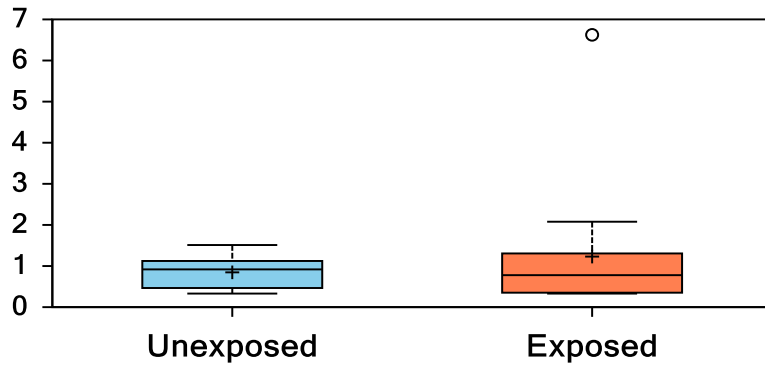

X - 12122

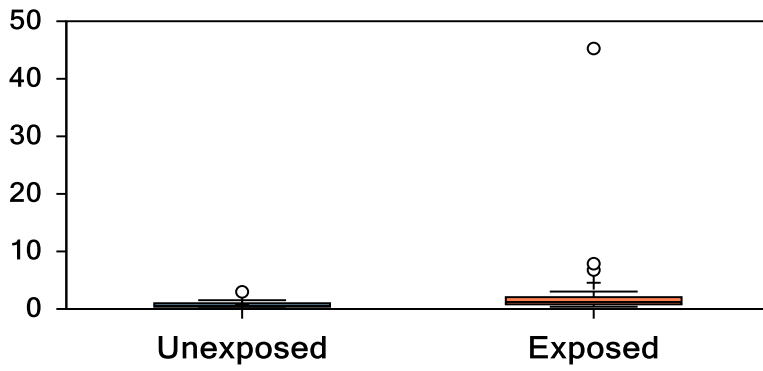

X - 12123

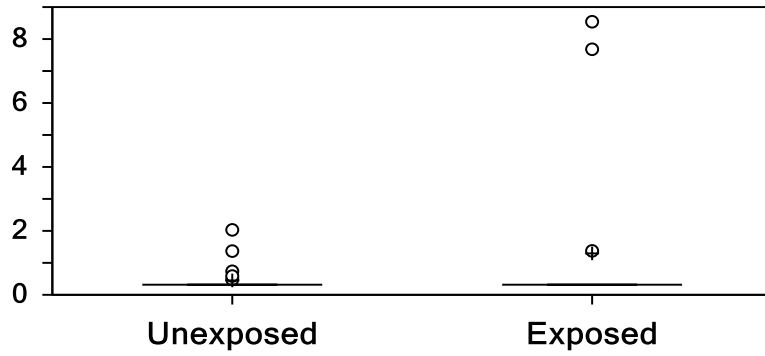

X - 11372

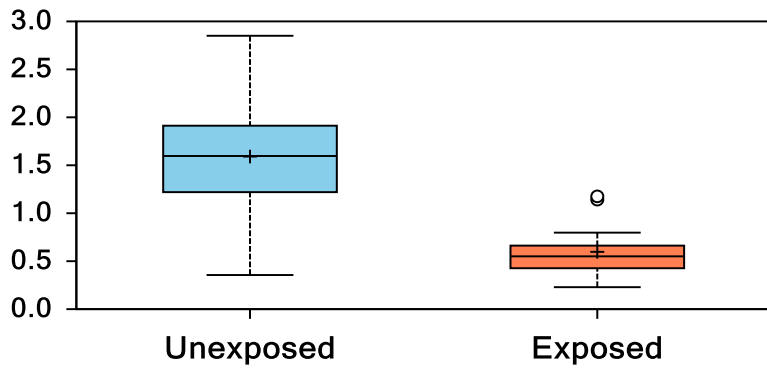

X - 11334

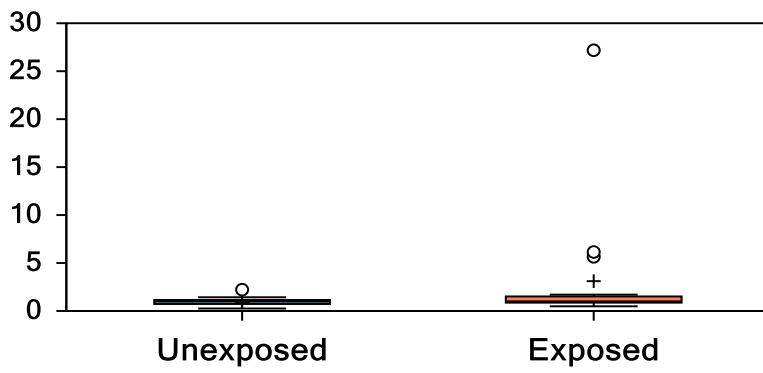

X - 11357

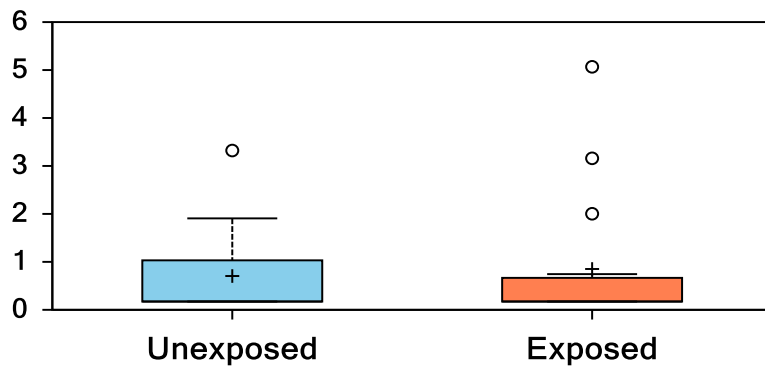

**X - 11441**

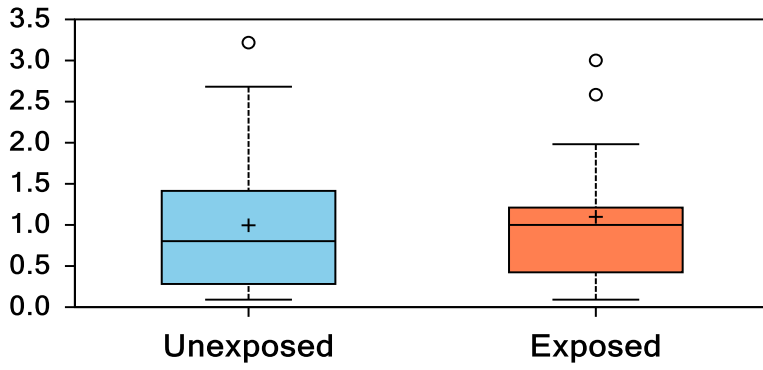

**X - 11396**

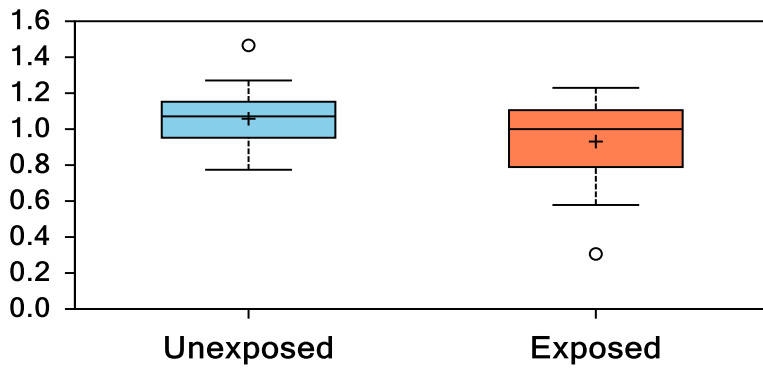

**X - 07765**

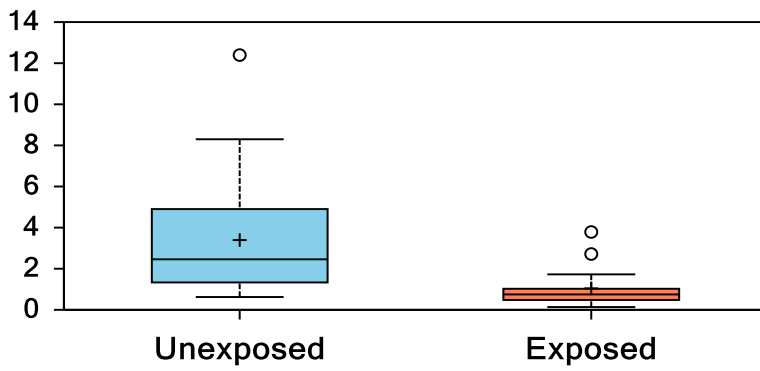

X - 08893

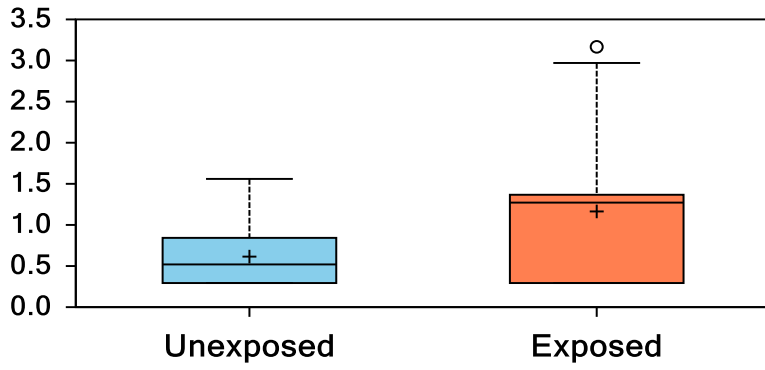

X - 03056

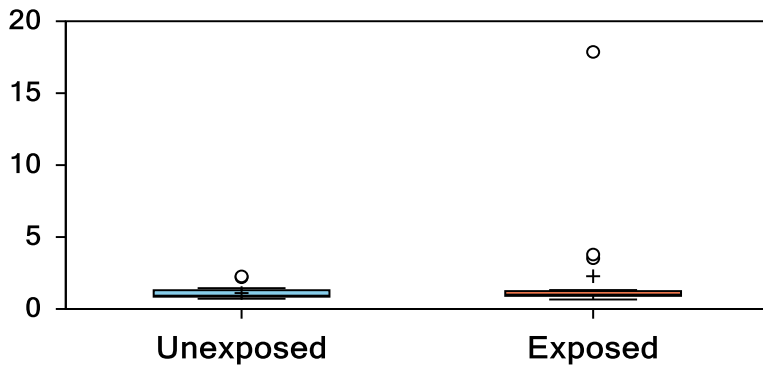

X - 11305

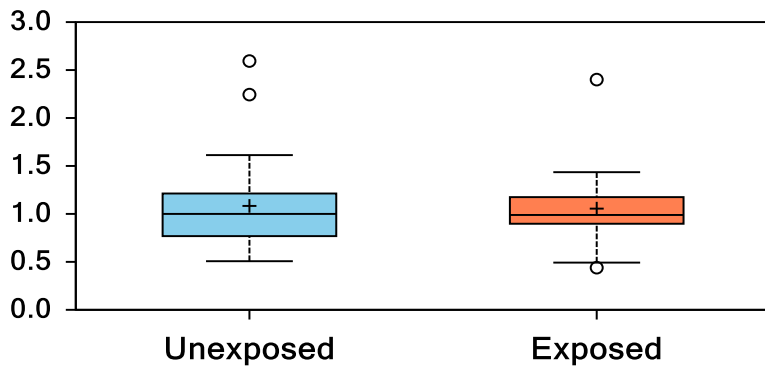



X - 11247

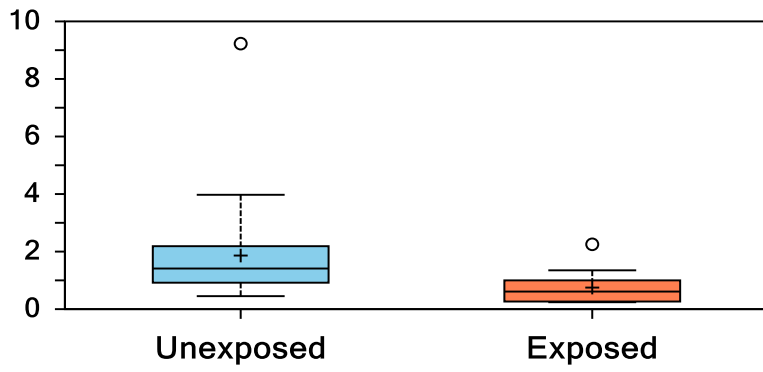

X - 11261

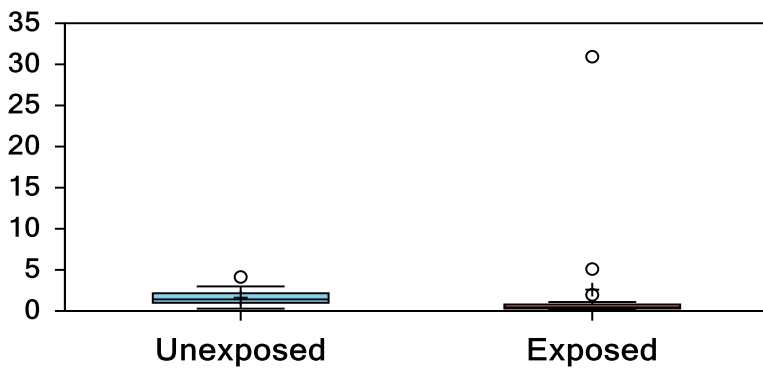

X - 11549

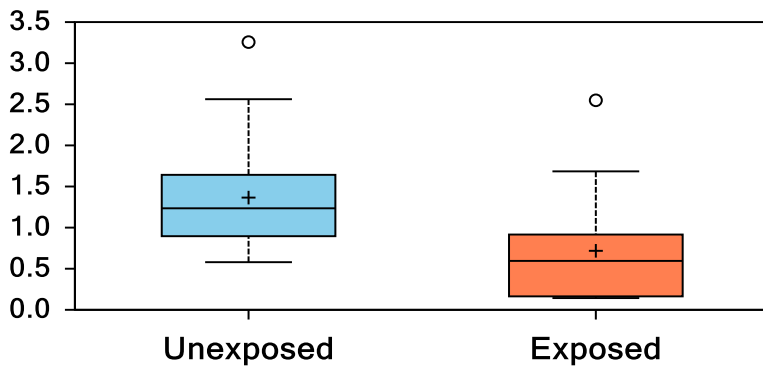

X - 11540

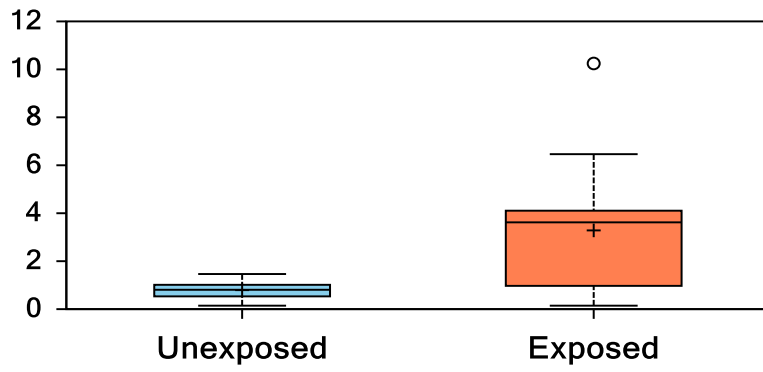

X - 11541

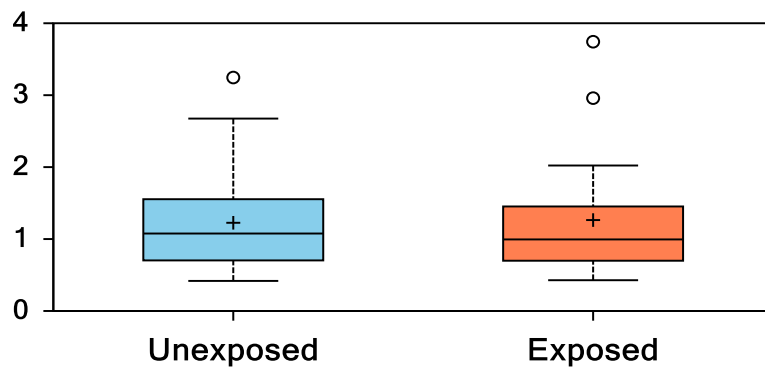

X - 11795

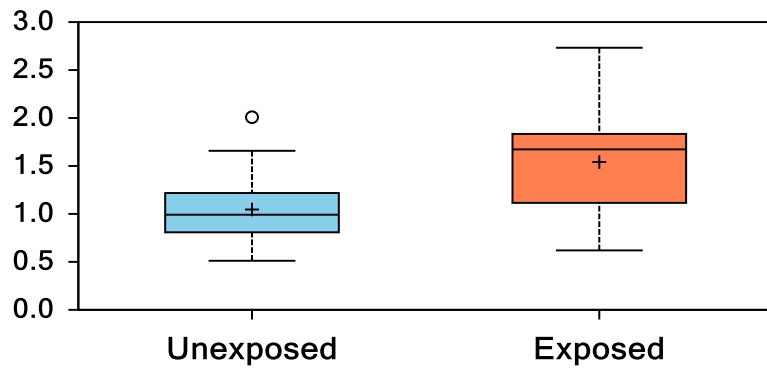

X - 11641

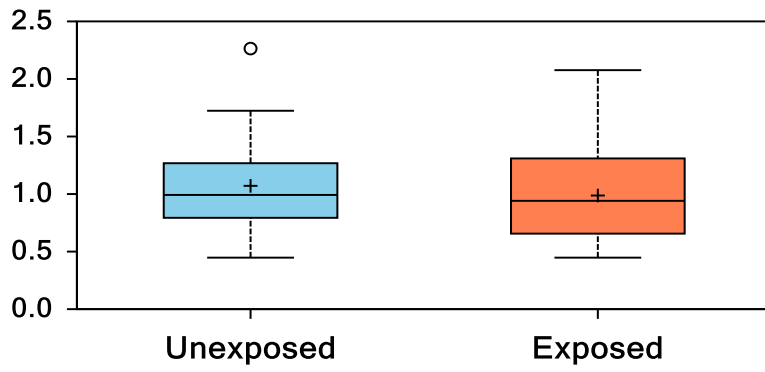

X - 11478

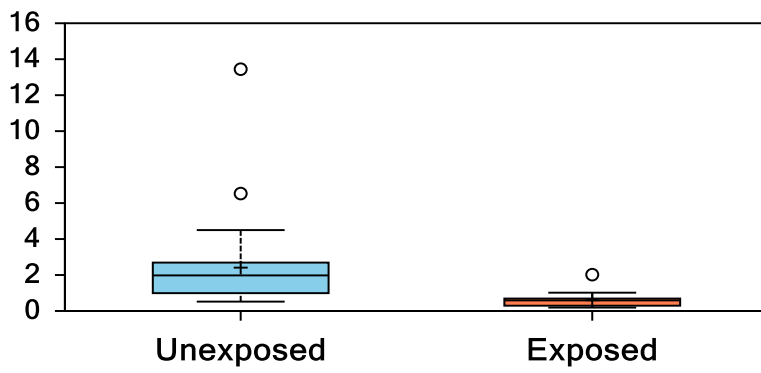

X - 11483

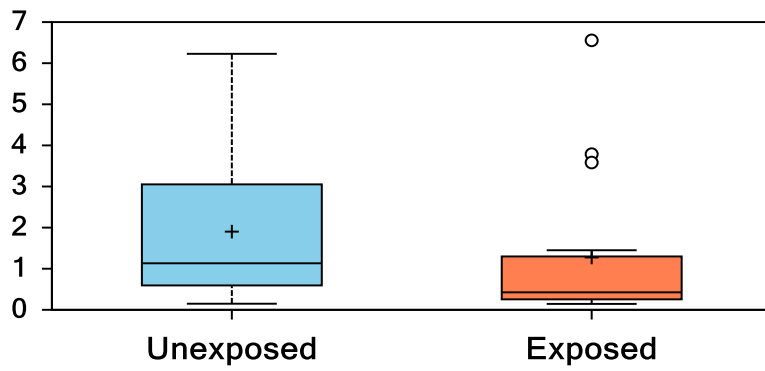

X - 11470

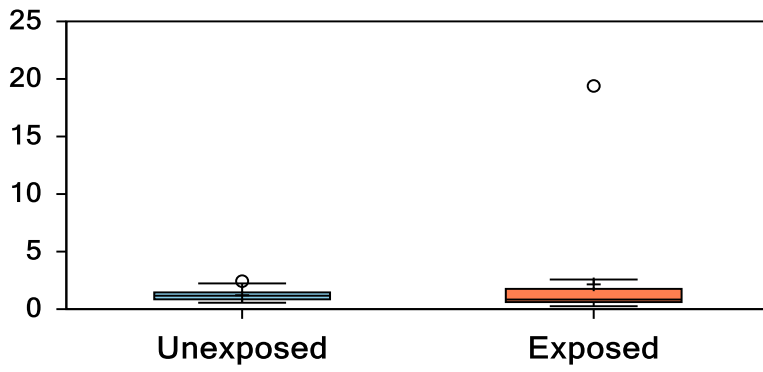

X - 11529

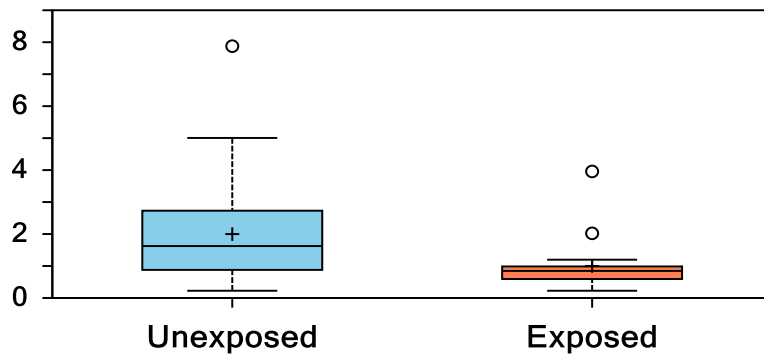

X - 11497

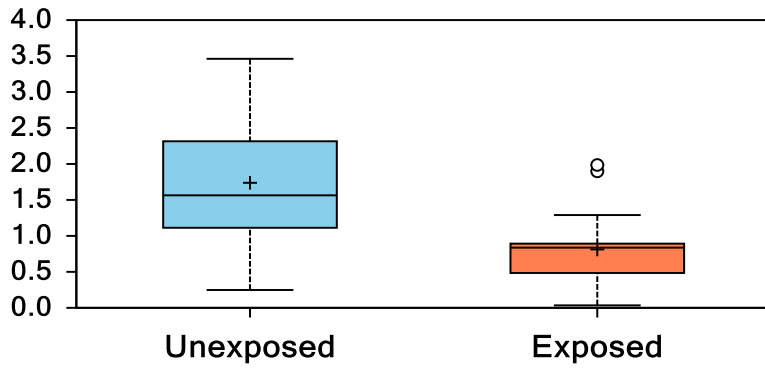

X - 11521

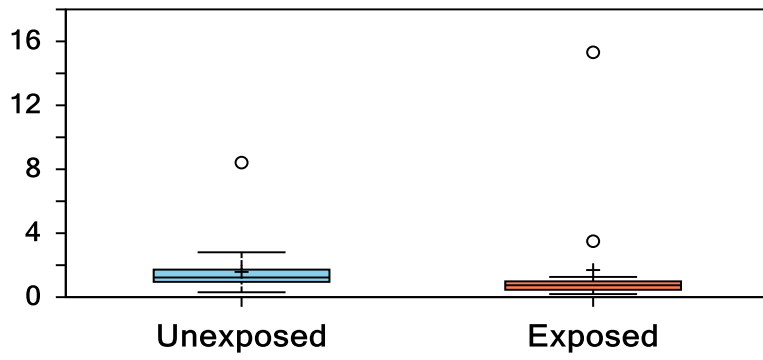

X - 13688

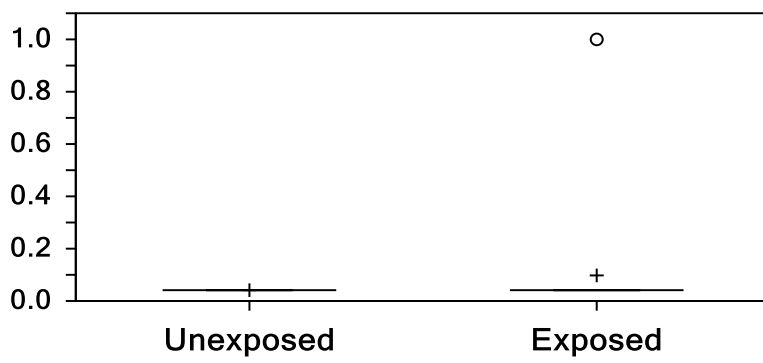

X - 13512

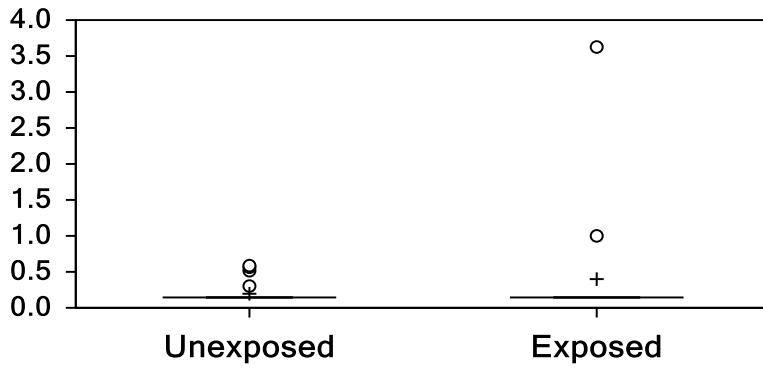

X - 13727

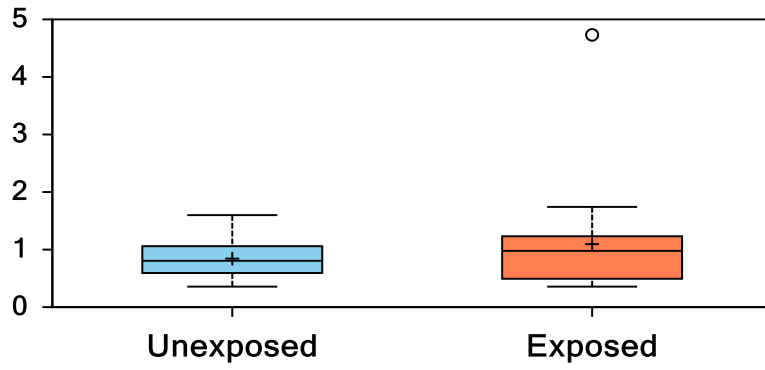

X - 13730

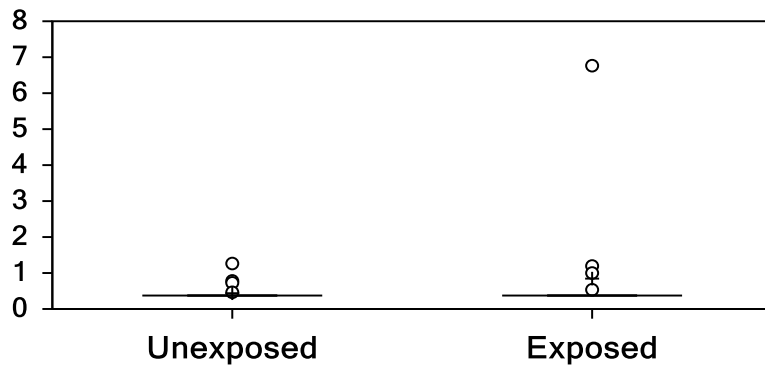

X - 13709

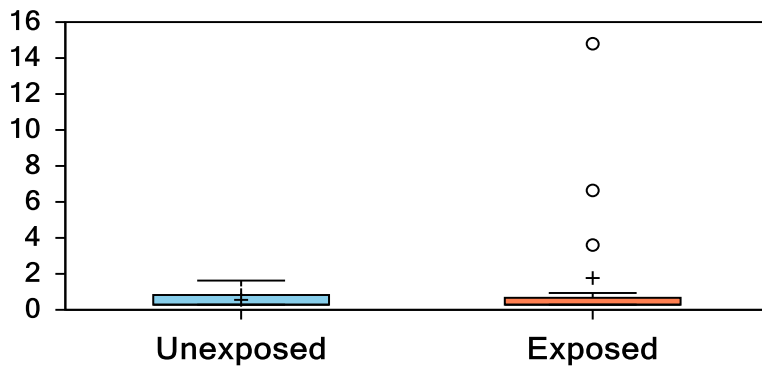

X - 12909

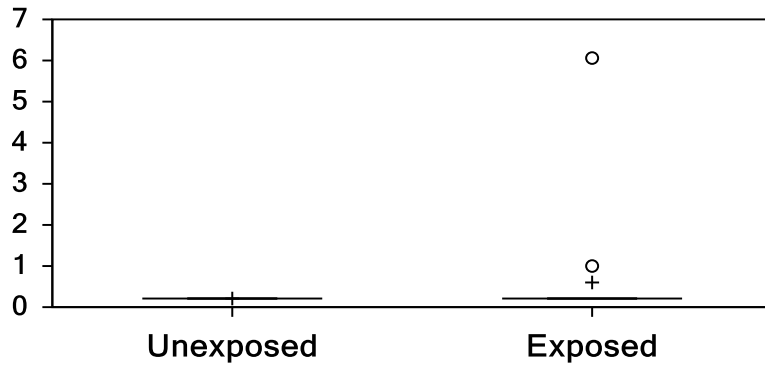

X - 12874

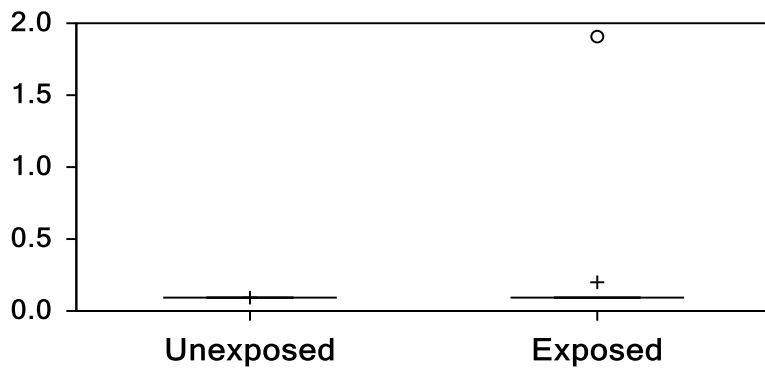

X - 12878

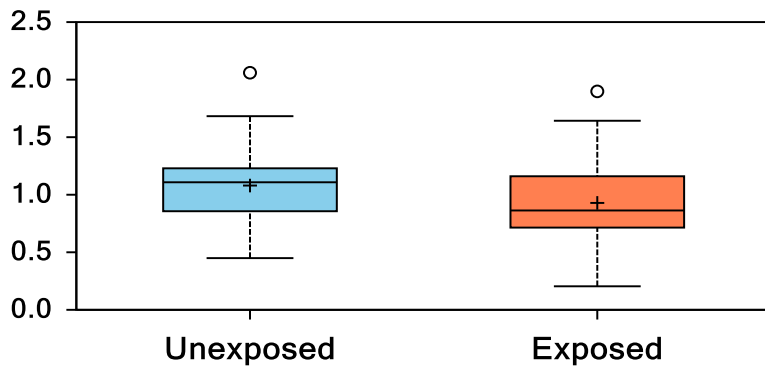

X - 13462

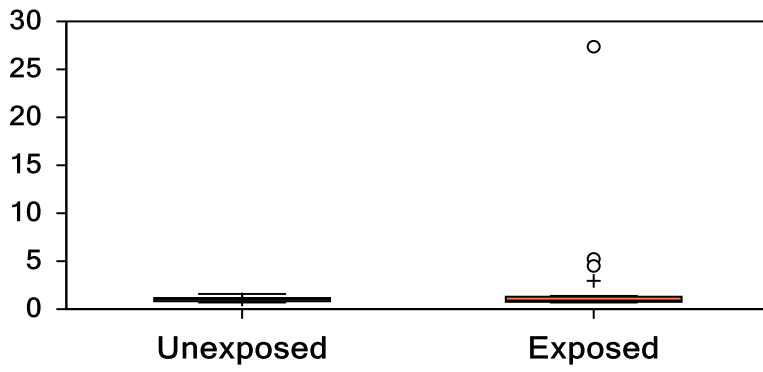

X - 13215

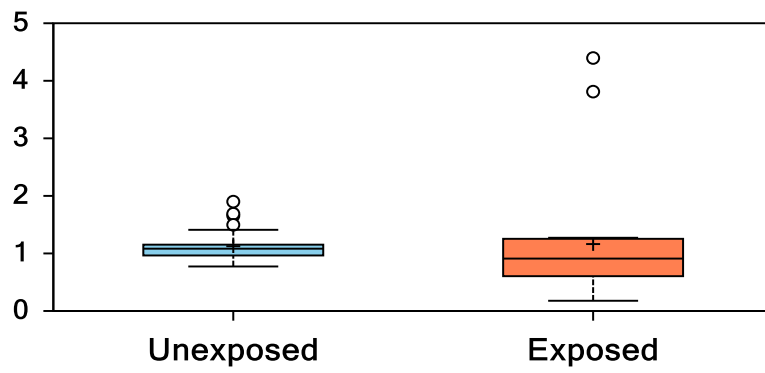

X - 13737

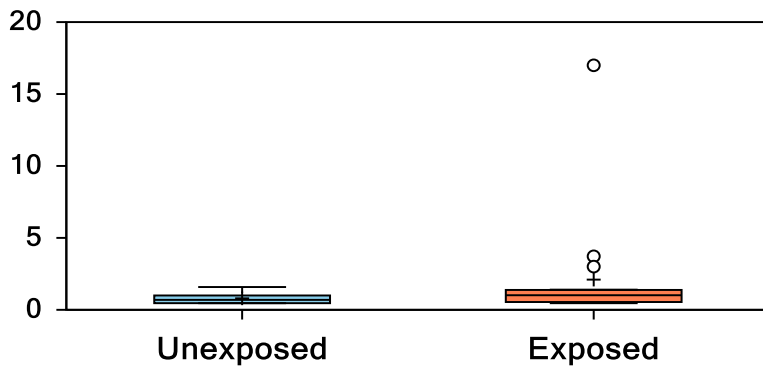



X - 14132

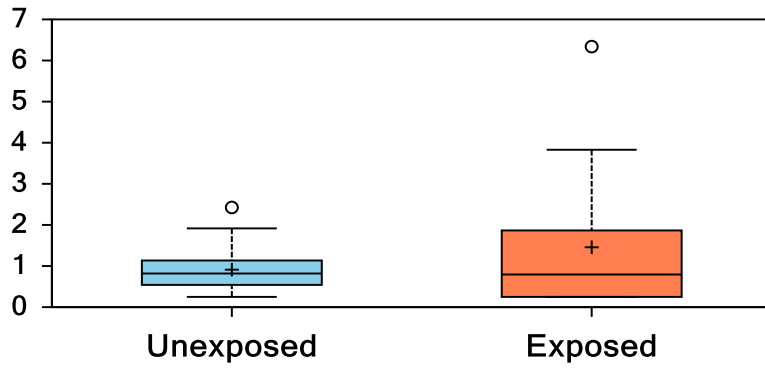

X - 14092

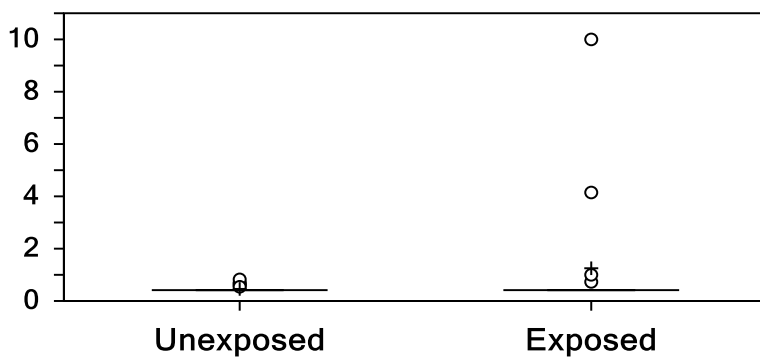

X - 14161

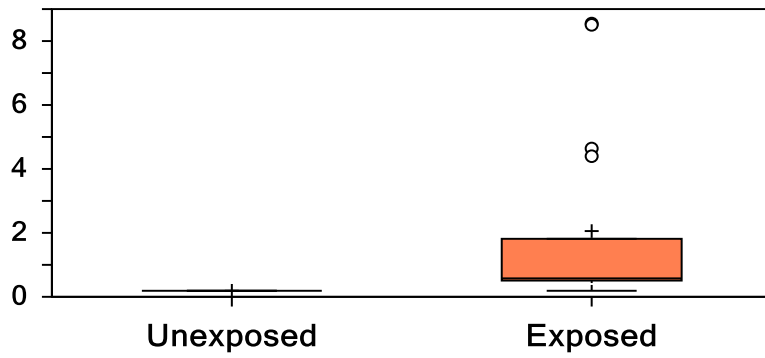

X - 14162

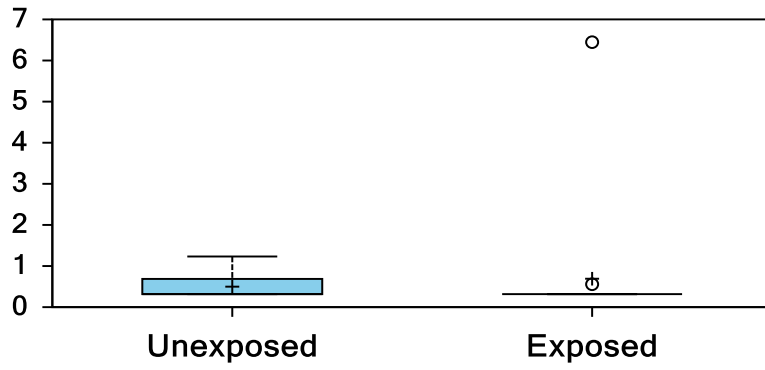

X - 14150

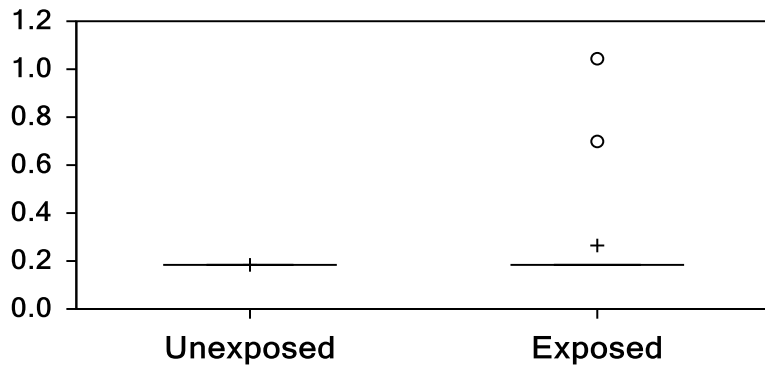

X - 13847

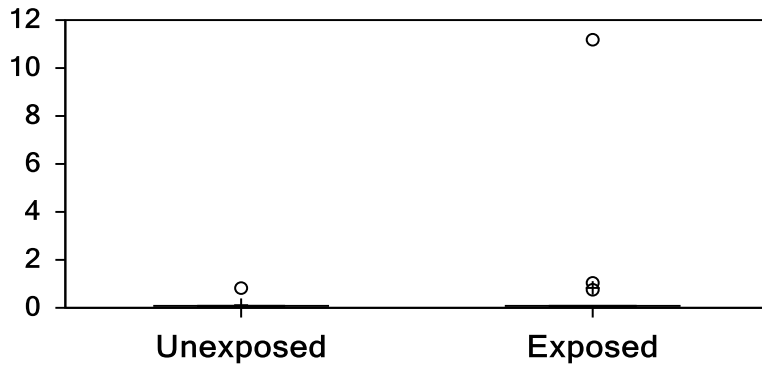

X - 13743

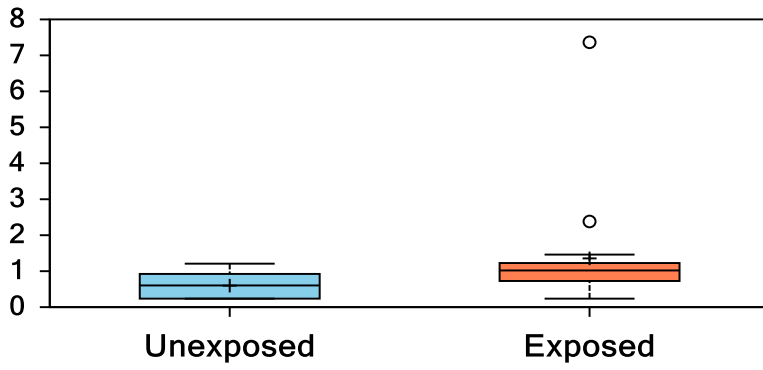

X - 13837

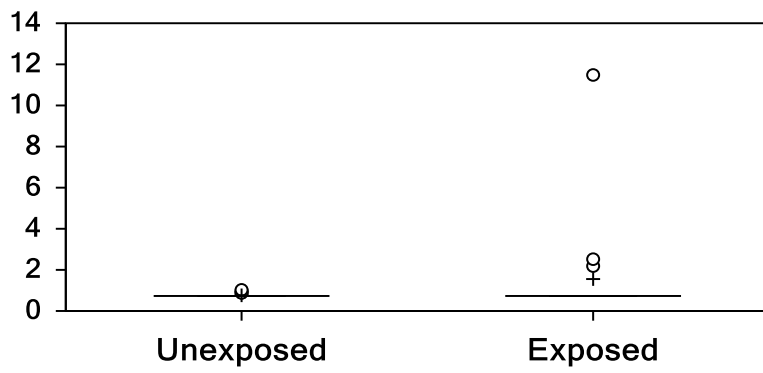

X - 14087

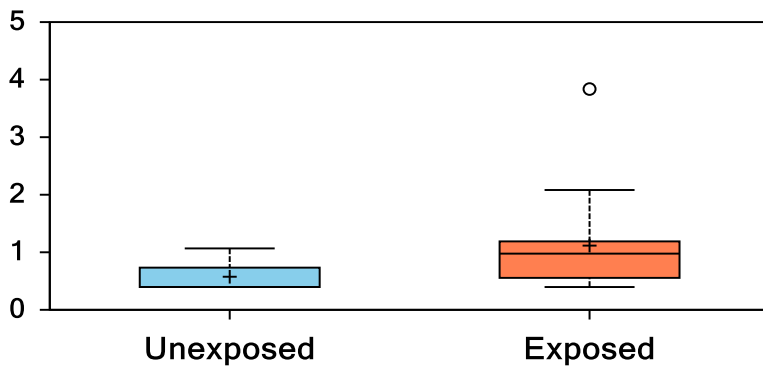

X - 13871

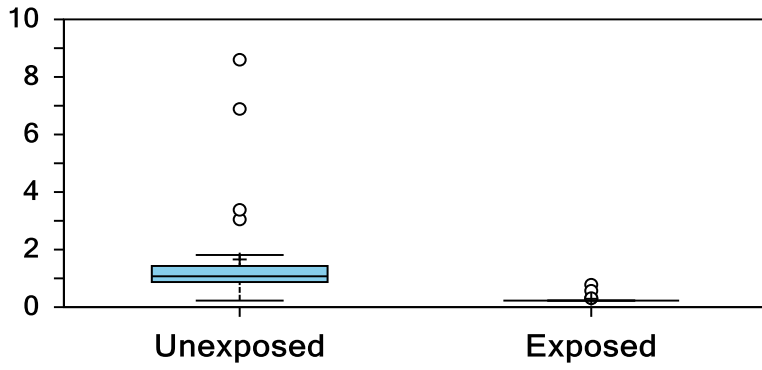

X - 12851

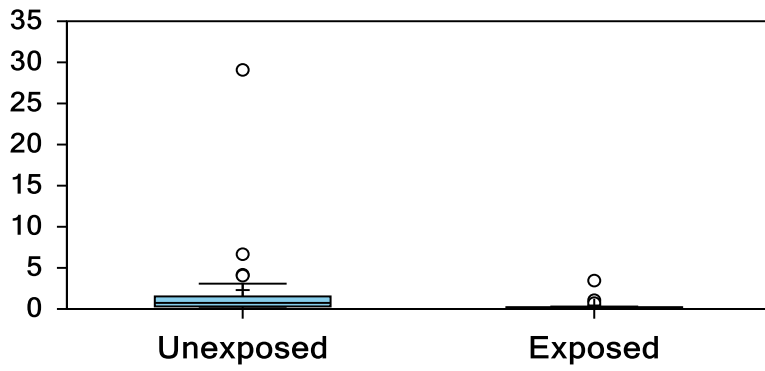

X - 12645

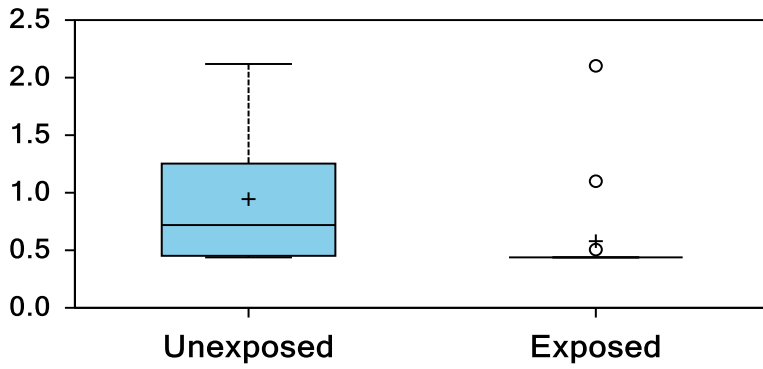

X - 12543

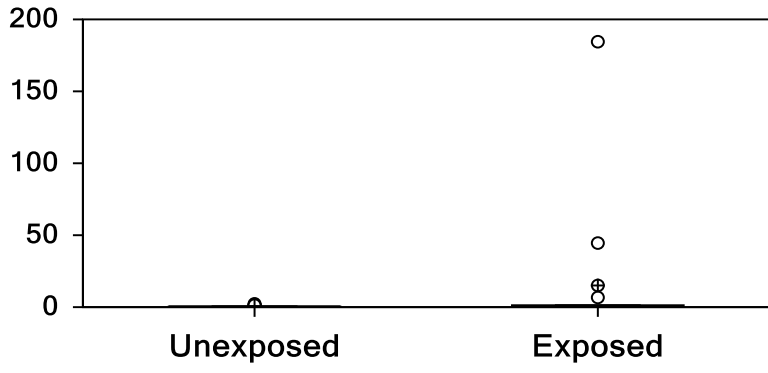

X - 12705

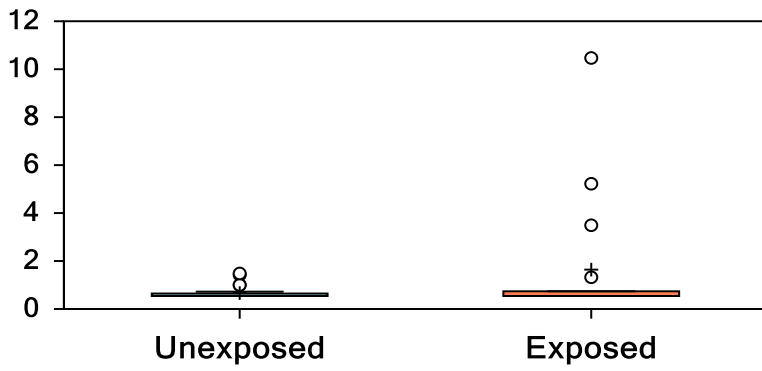

X - 12714

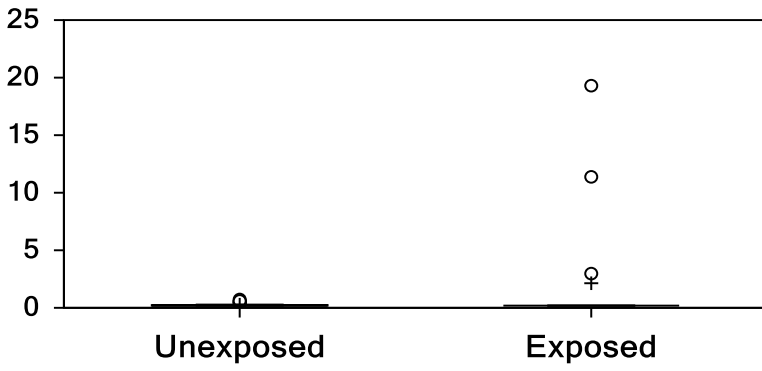

X - 12695

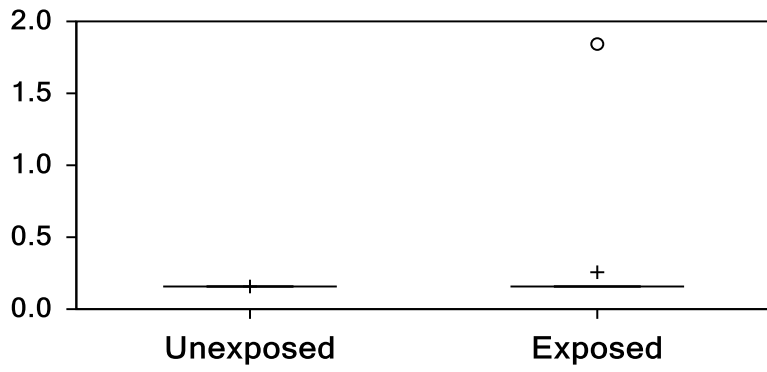

X - 12339

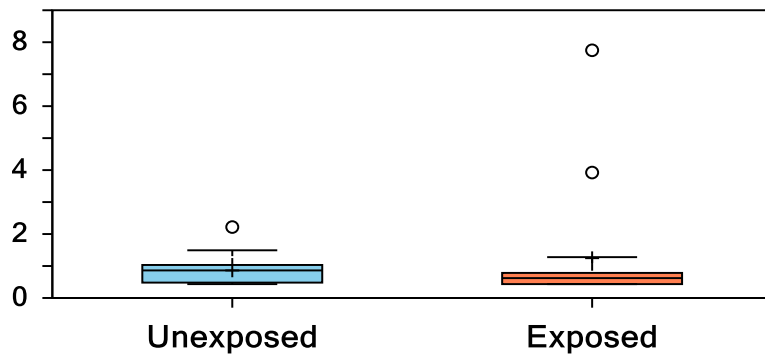

X - 12329

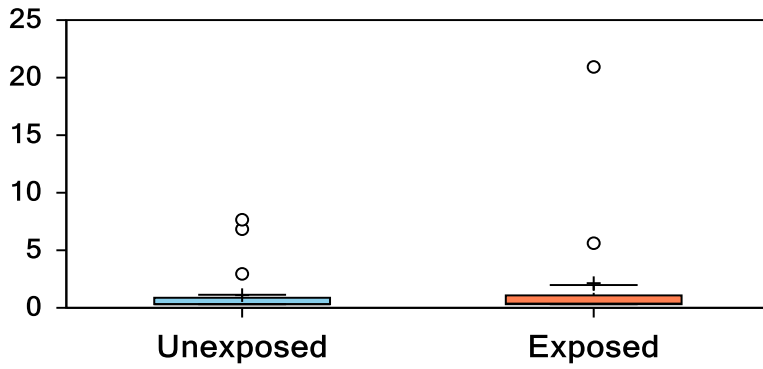

X - 12331

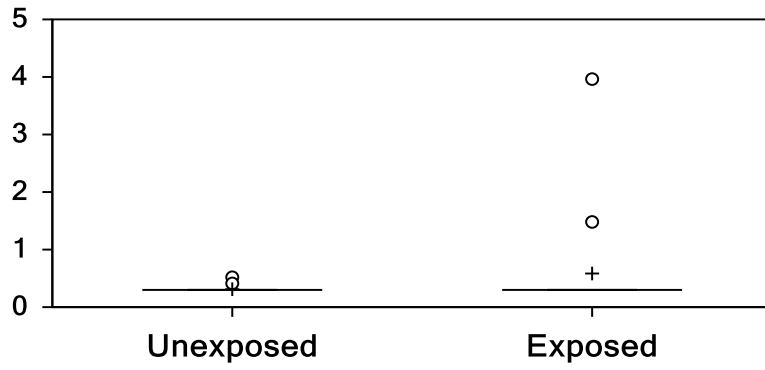

X - 12525

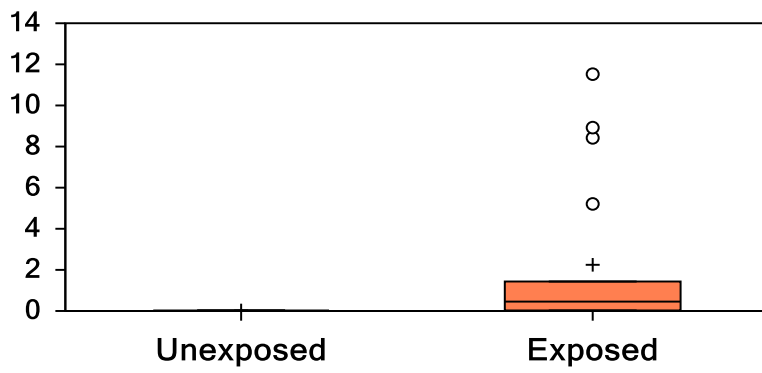

X - 12411

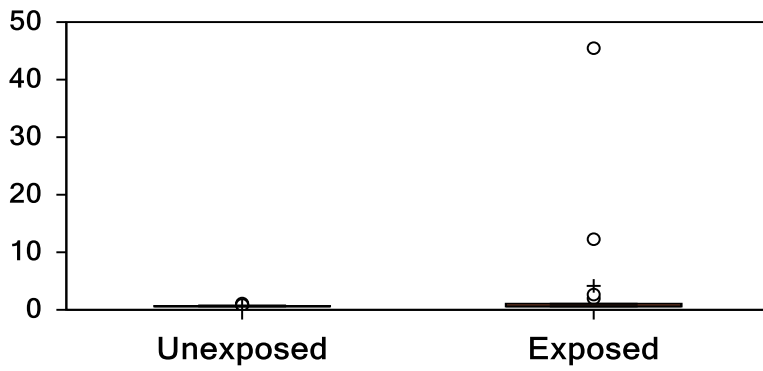

X - 12718

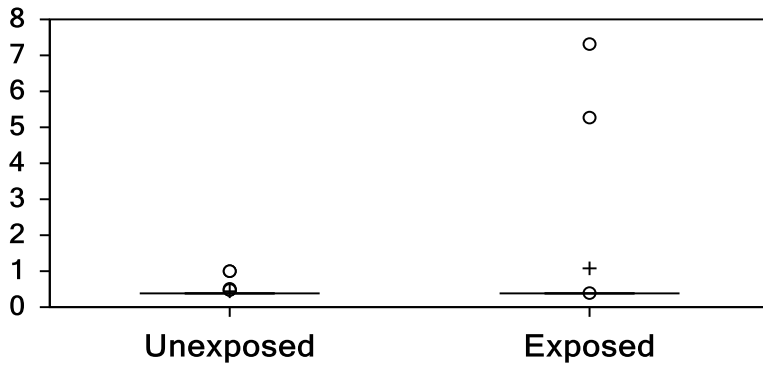

X - 12830

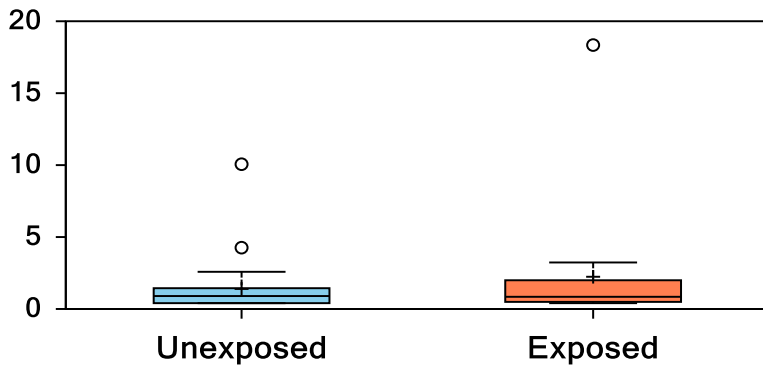

X - 12812

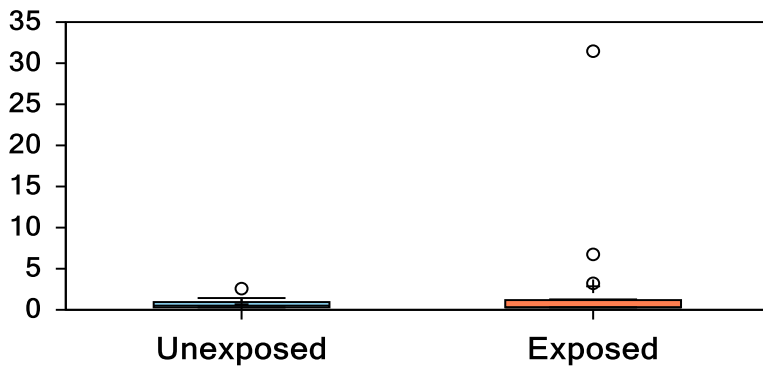



X - 12847

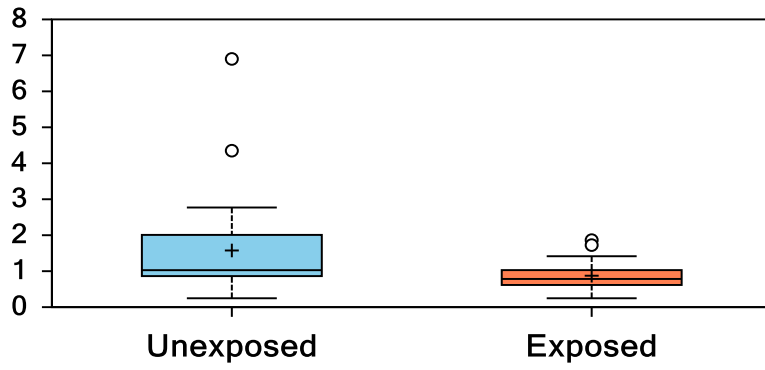

X - 12849

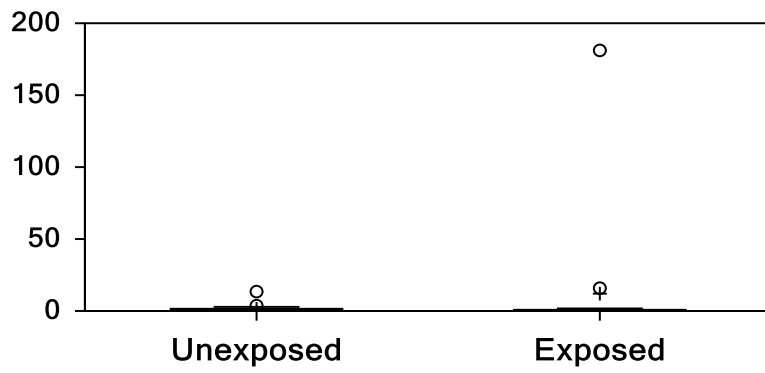

X - 12844

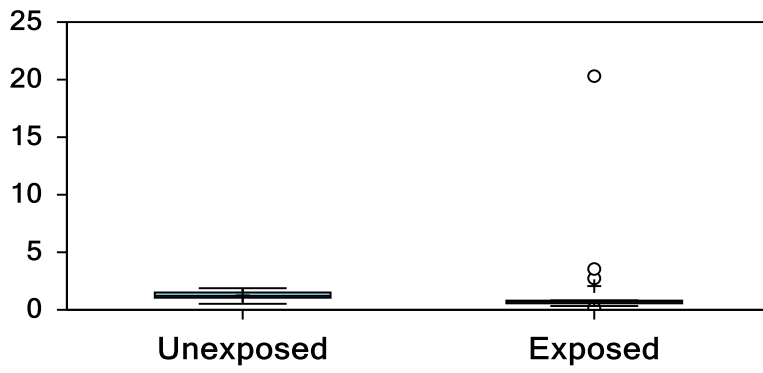

X - 12740

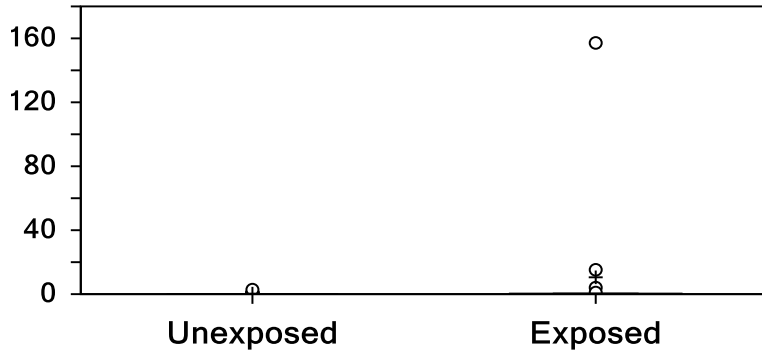

X - 12734

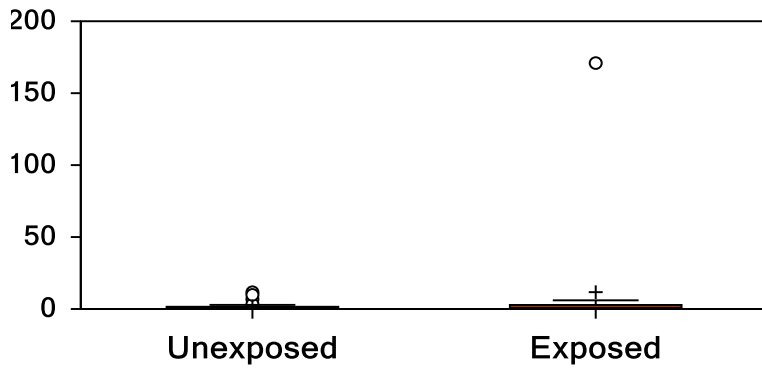

X - 12738

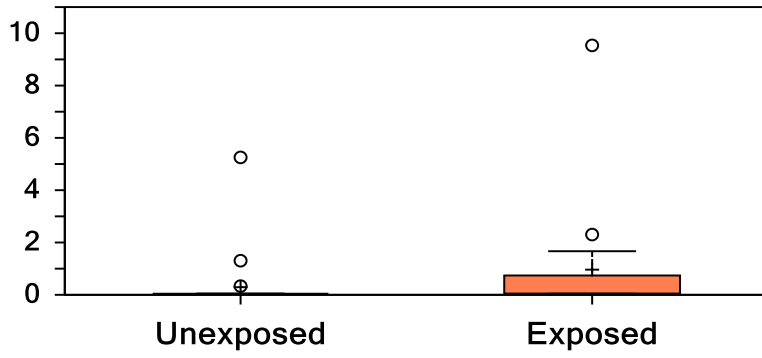

X - 12805

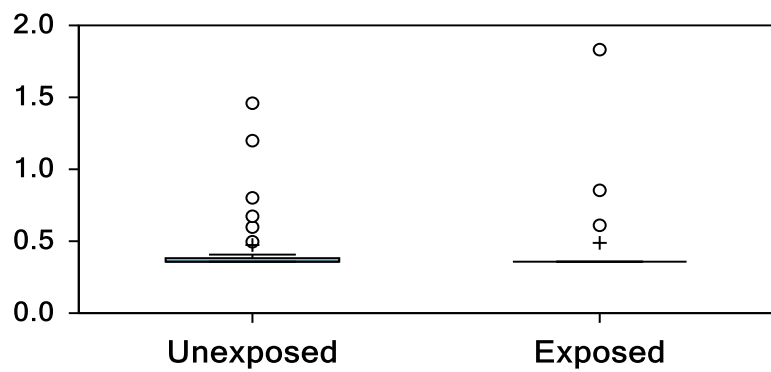

X - 12748

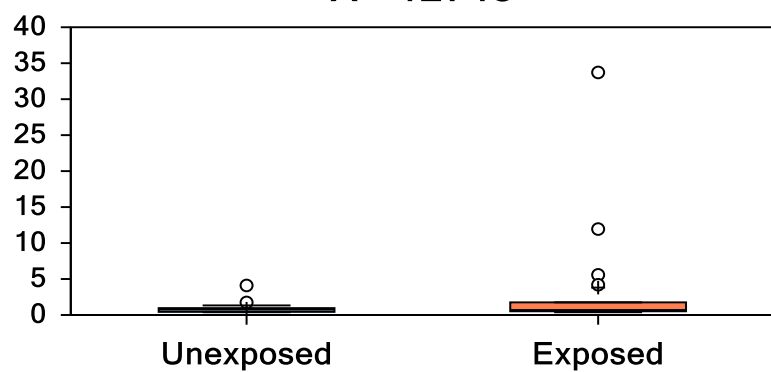

Supplement: NIHMS921606-supplement-SupplementalFigure2.pdf [file NIHMS921606-supplement-SupplementalFigure2.pdf]
