# Supplementary material
Source: PubMed Central journal article supplement (PMC5712227)

### [H]HWESASLLR[OH]

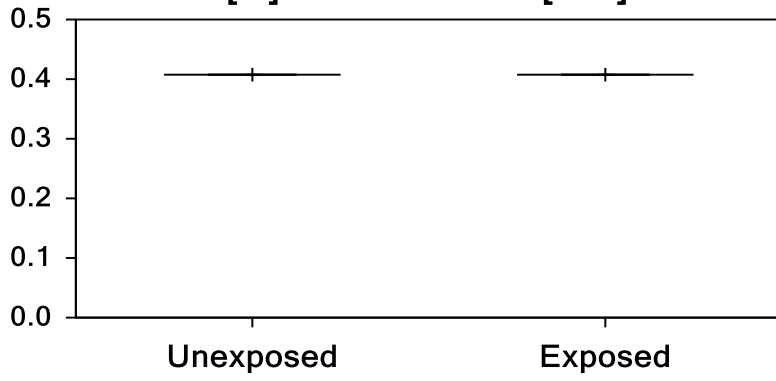

### 1,6-anhydroglucose

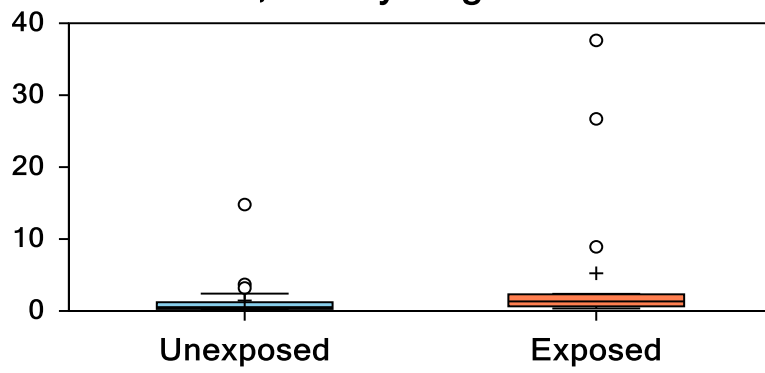

### 10-nonadecenoate (19:1n9)

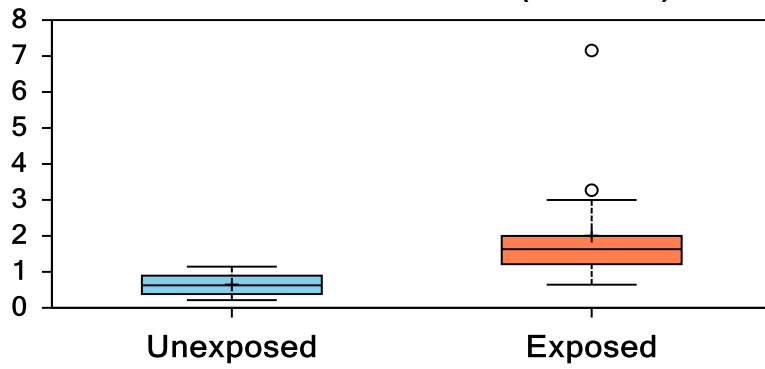

### 13-HODE

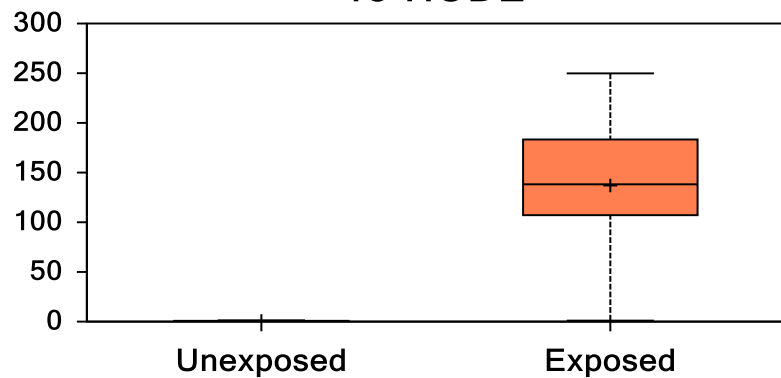

### 5-methylpalmitate (isobar with 2-methylpaln)

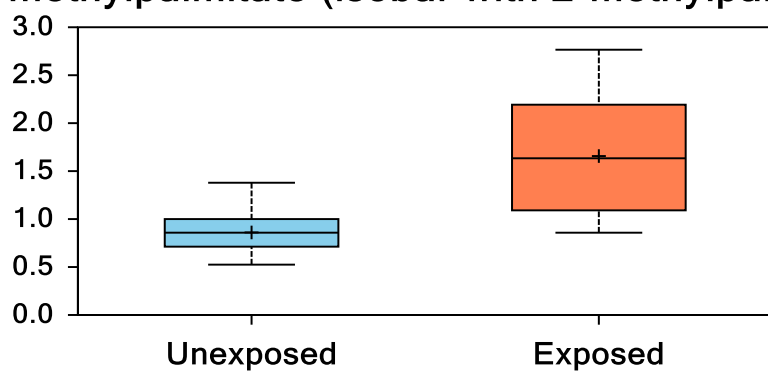

### 18-HEPE

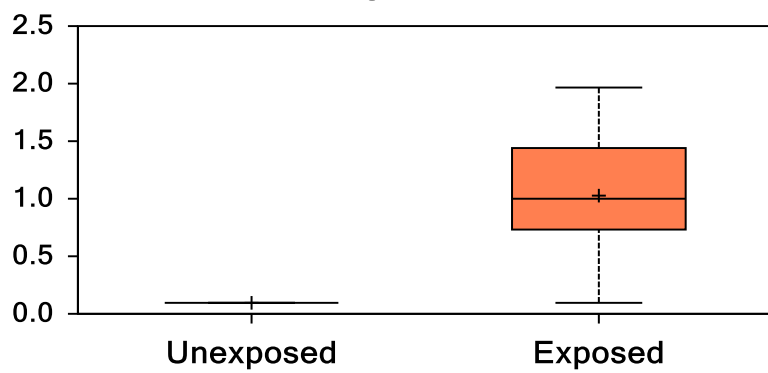

### 1-arachidonoylglycerophosphoinositol\*

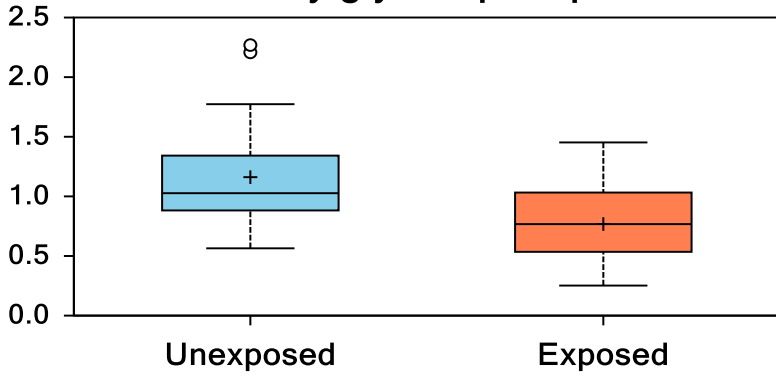

### 1-docosaehaenoylglycerophosphocholin

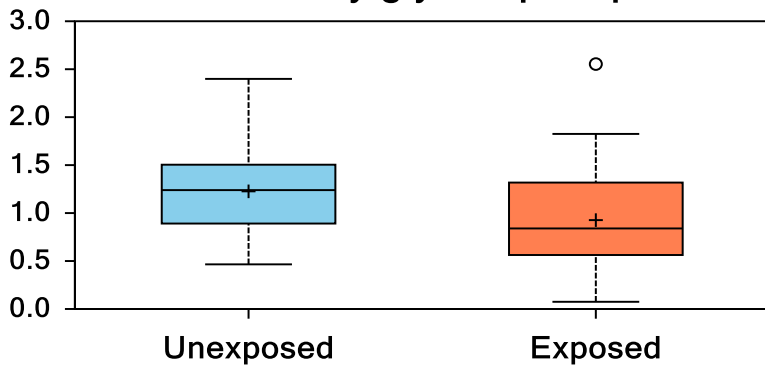

### 1-eicosatrienoylglycerophosphocholine

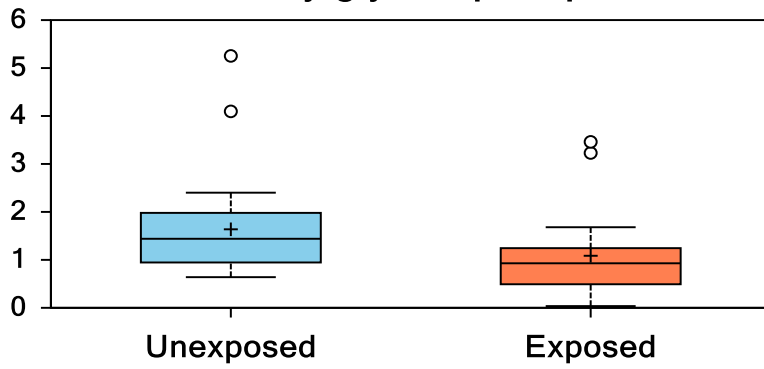

1-linoleoylglycerol (1-monolinolein)

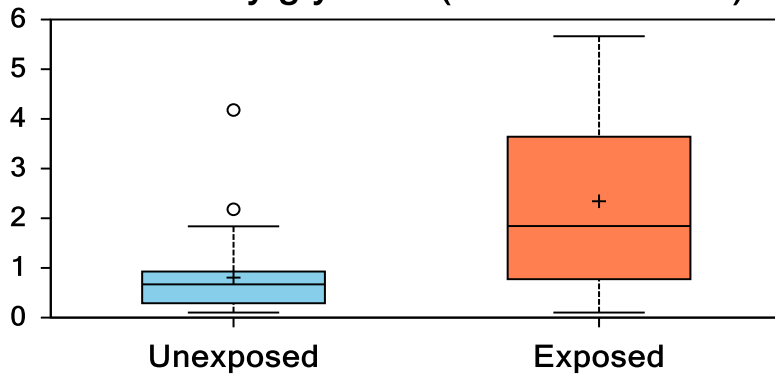

1-methylimidazoleacetate

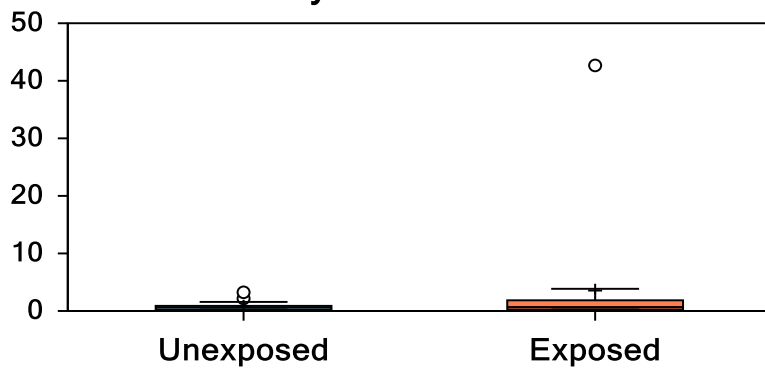

1-octadecanol

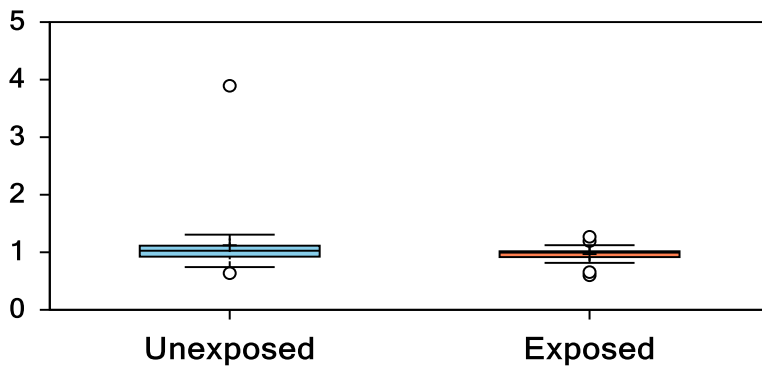



### 1-oleoylglycerophosphoethanolamine

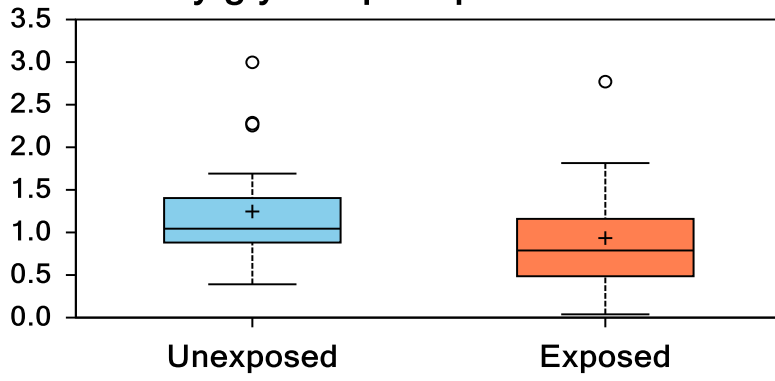

### 1-palmitoylglycerophosphocholine

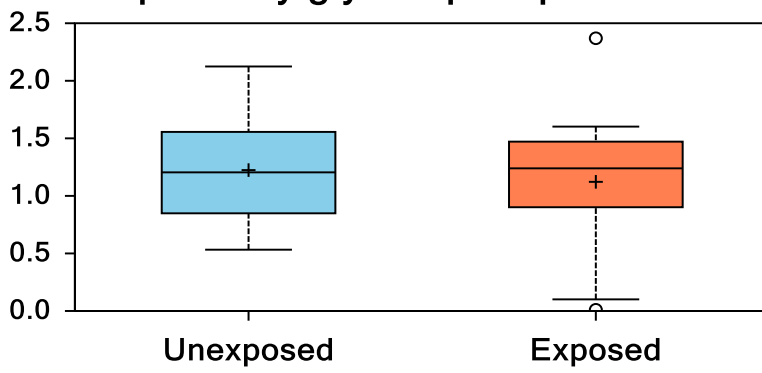

### 1-palmitoylplasménylethanolamine\*

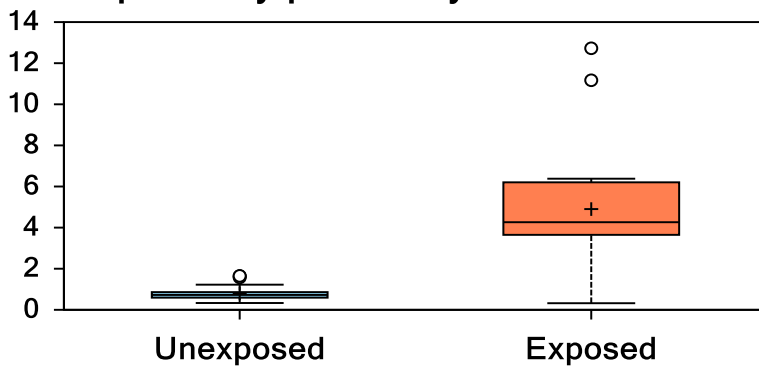

### 1-stearoylglycerophosphocholine

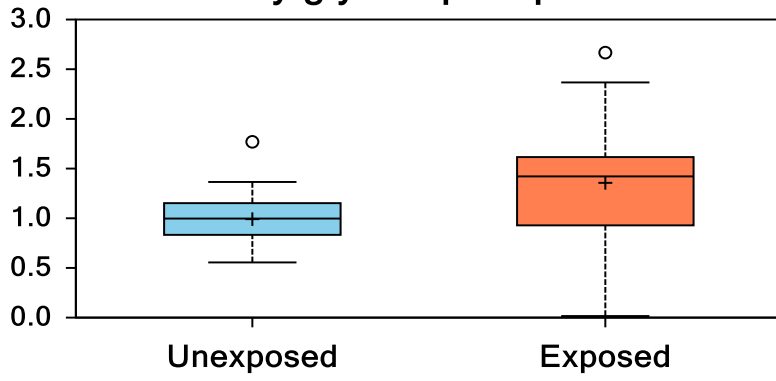

### 2,3-butanediol

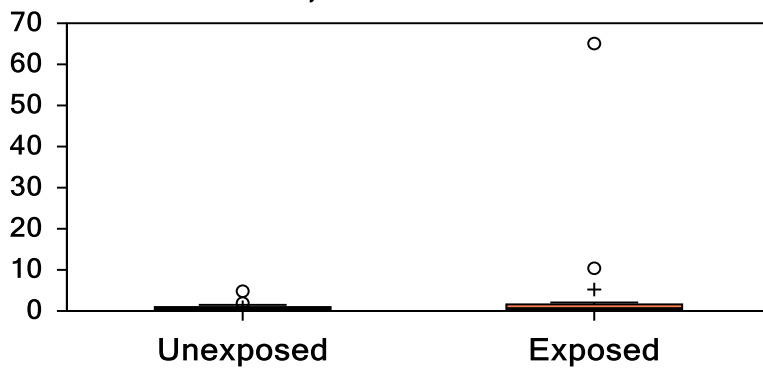

### 21-hydroxypregnenolone disulfate

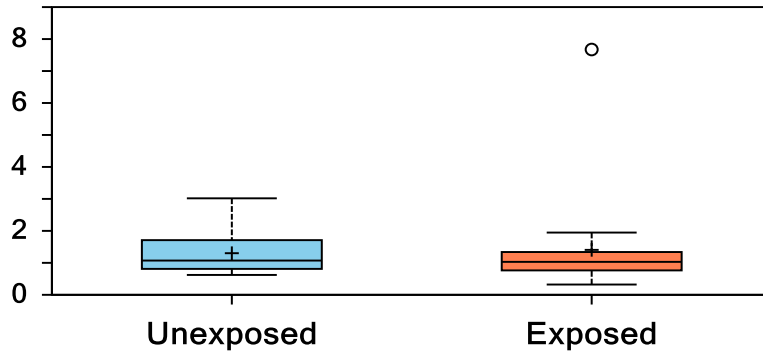

### 2-arachidonoylglycerophosphocholine\*

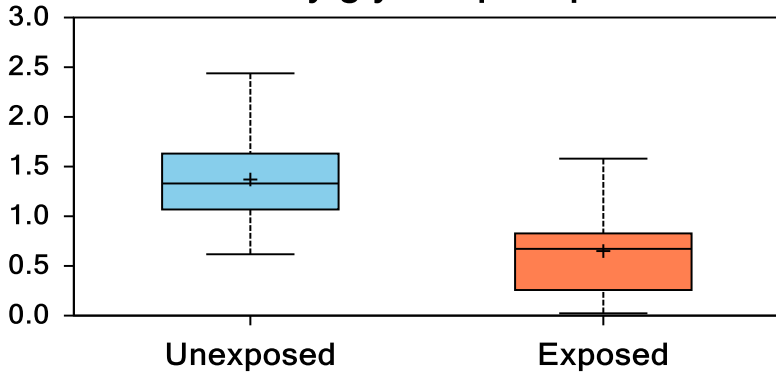

### 2-ethylhexanoate

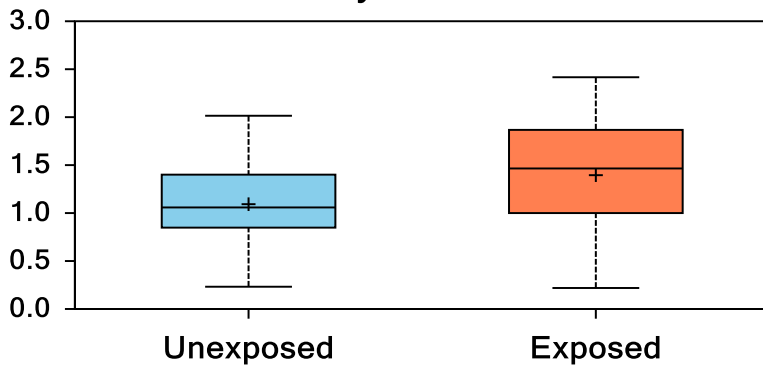

### 2-hydroxyadipate

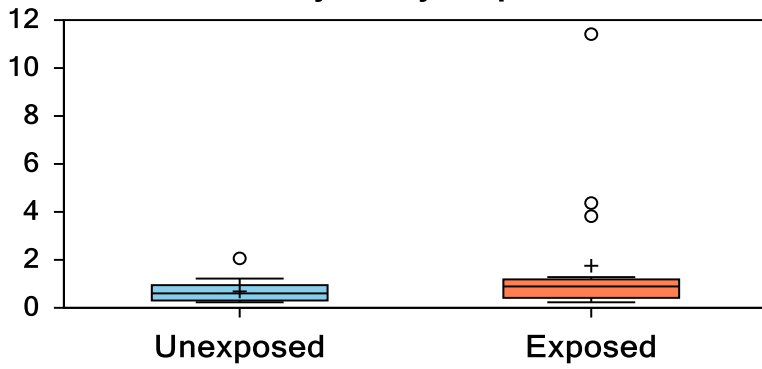

2-hydroxyhippurate (salicylurate)

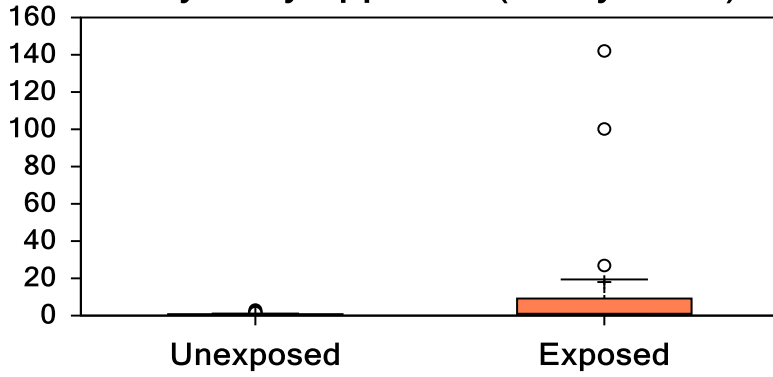

2-hydroxyoctanoate

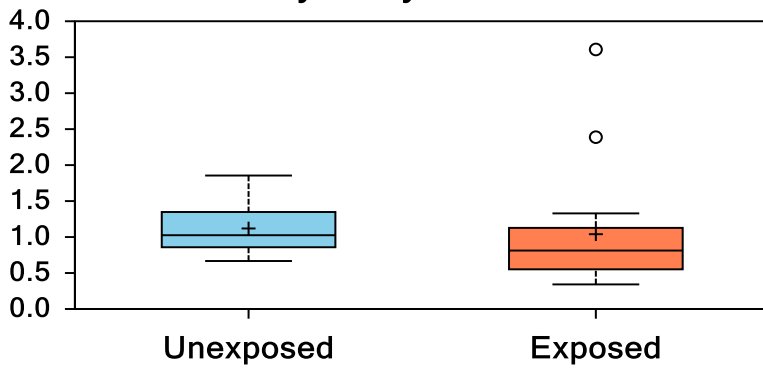

2-linoleoylglycerophosphocholine\*

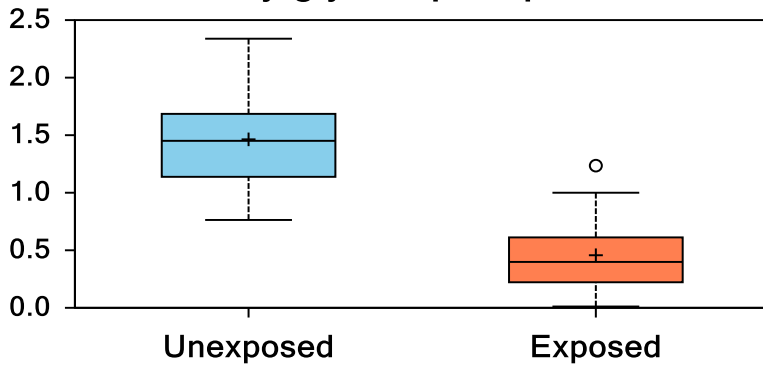

### 2-methylbutyroylcarnitine

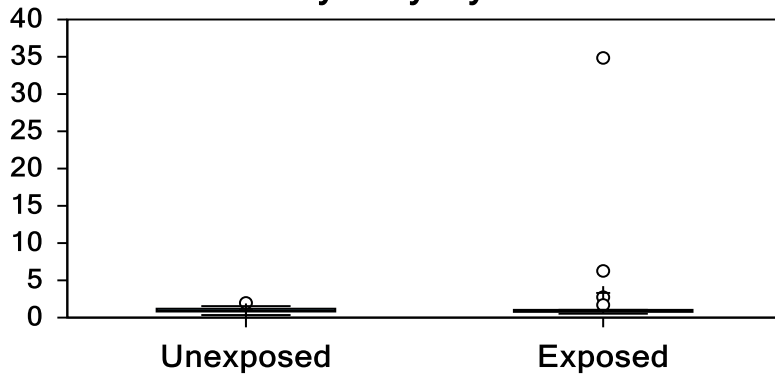

### 2-myristoylglycerophosphocholine\*

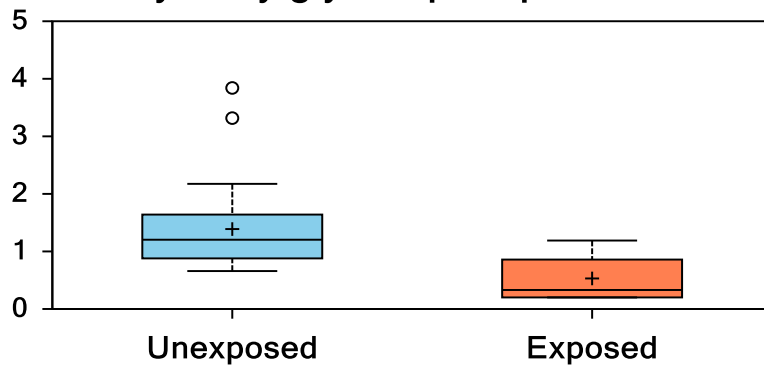

### 2'-O-methylguanosine

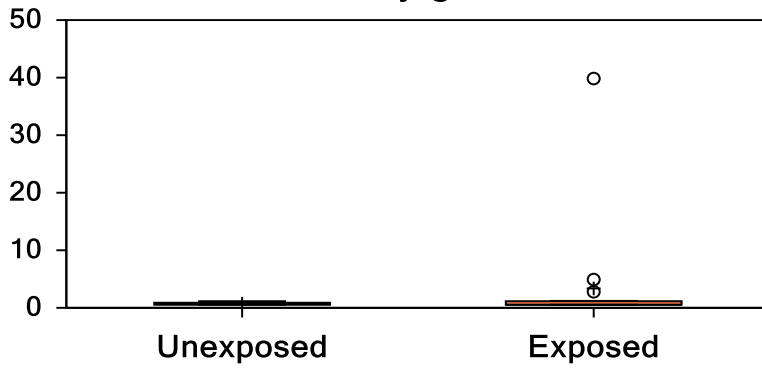

### 2-palmitoylglycerophosphocholine\*

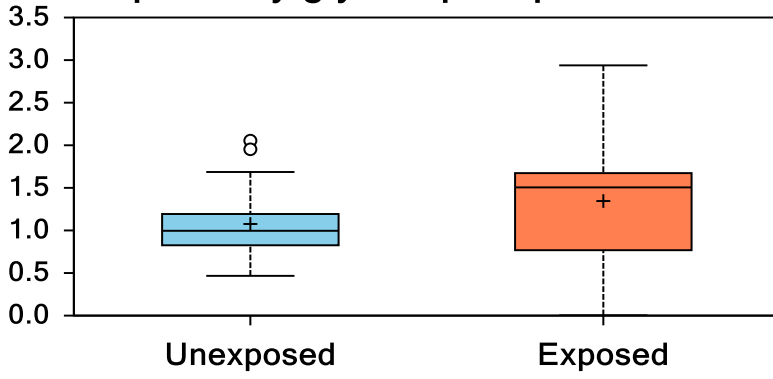

### 3-(3-hydroxyphenyl)propionate

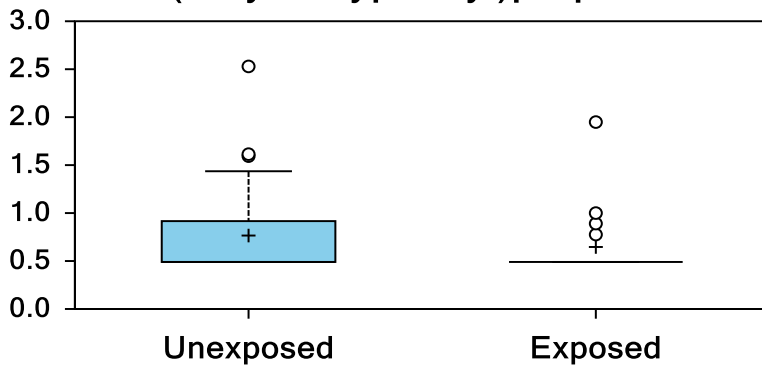

### 3-aminoisobutyrate

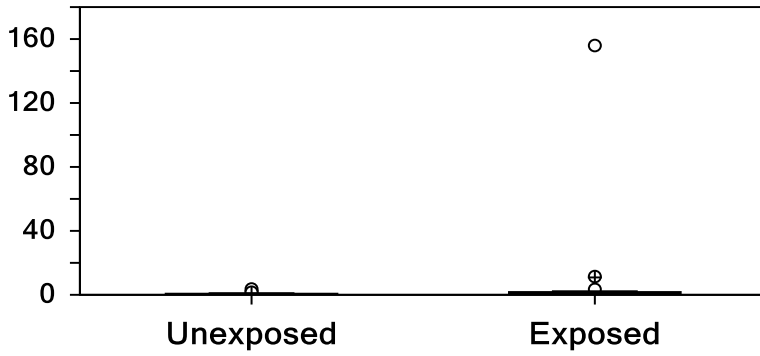

### 3-ethylphenylsulfate\*

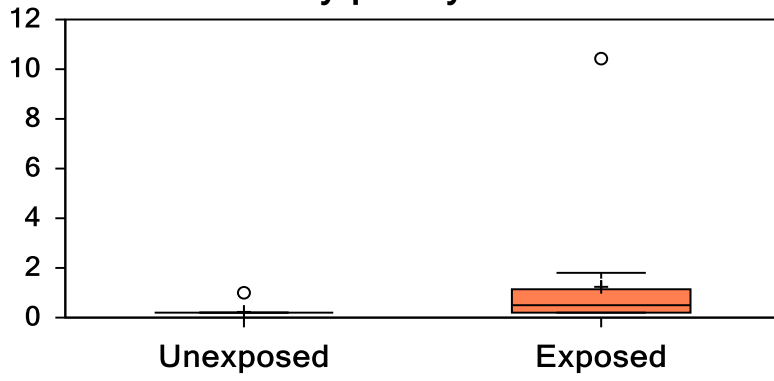

### 3-hydroxybutyrate (BHBA)

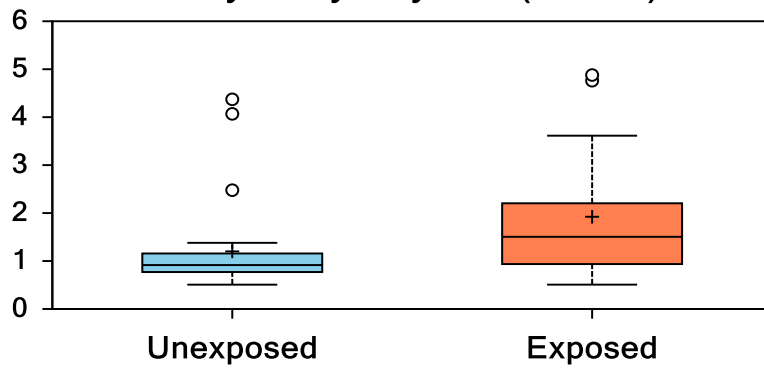

### 3-hydroxyisobutyrate

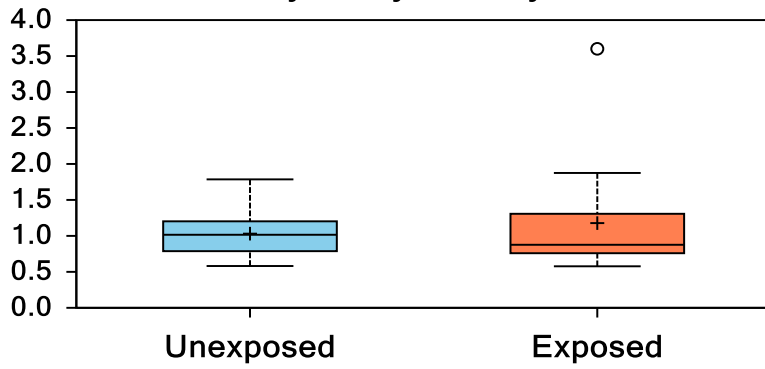

### 3-hydroxysebacate

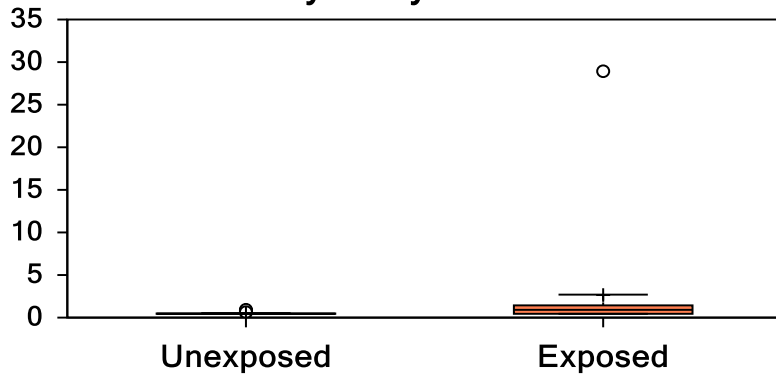

### 3-methyl-2-oxobutyrate

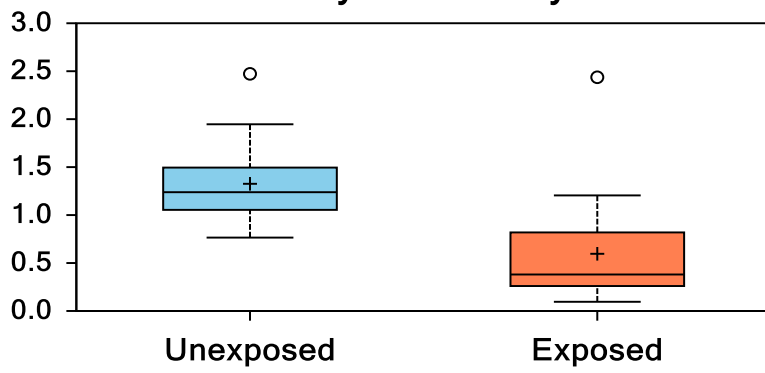

### 3-methylhistidine

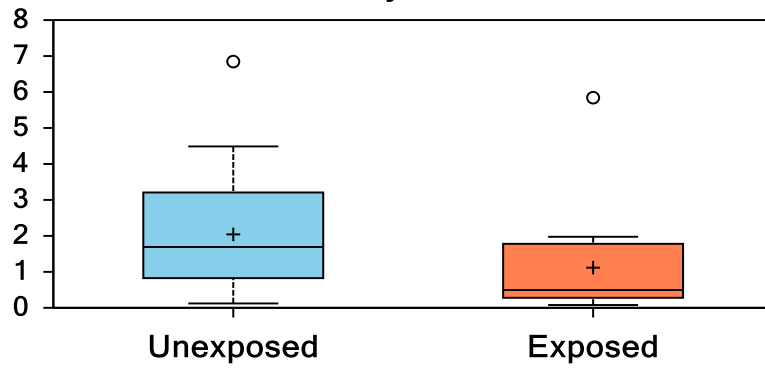



### 3-ureidopropionate

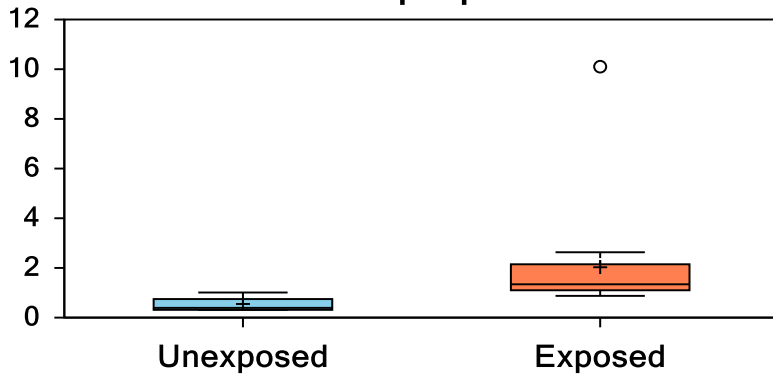

### 4-acetaminophen sulfate

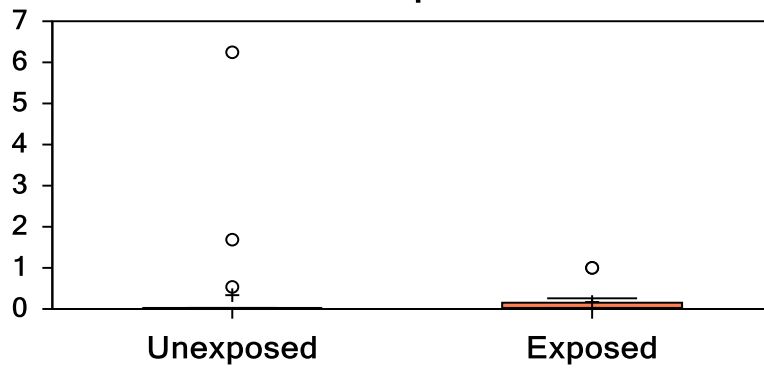

### 4-androsten-3beta,17beta-diol disulfate 2

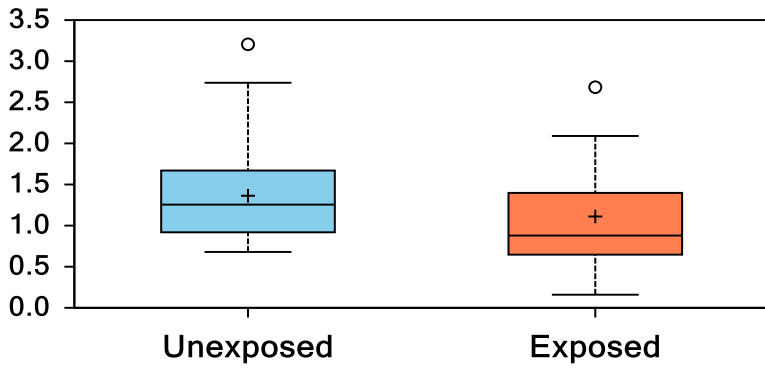

### 4-hydroxybenzyl alcohol

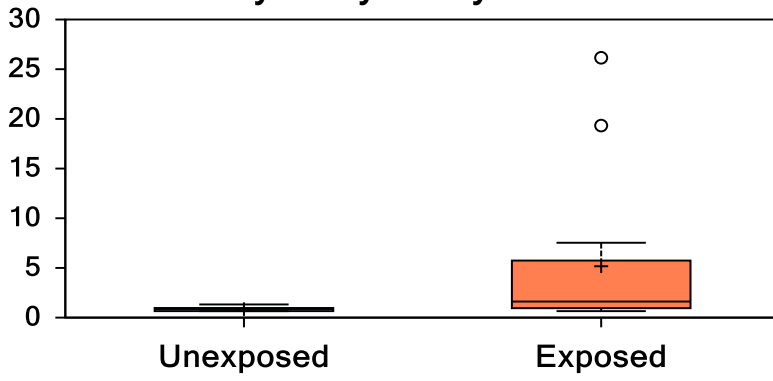

### 4-hydroxyhippurate

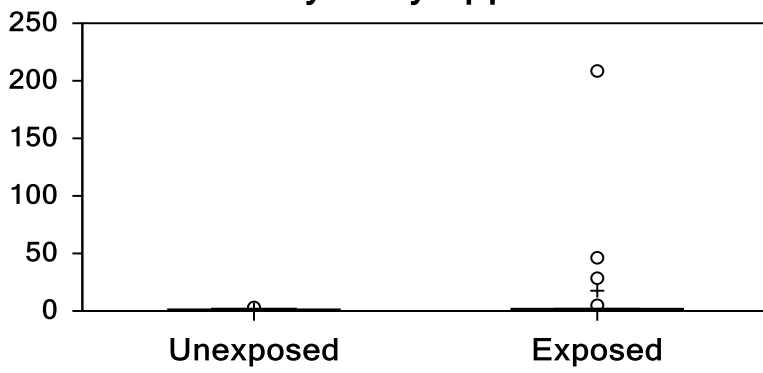

### 4-imidazoleacetate

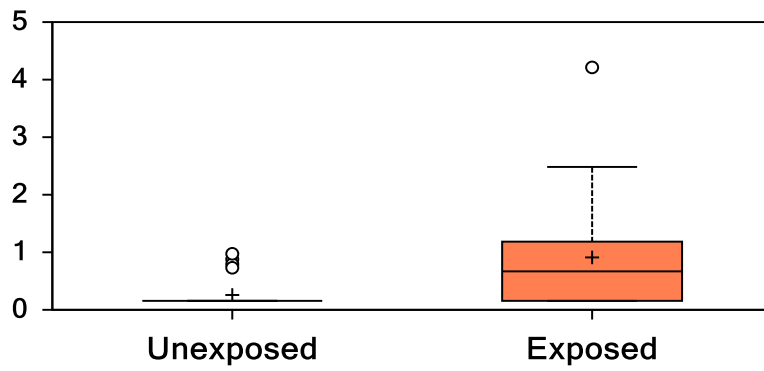

### 4-vinylphenol sulfate

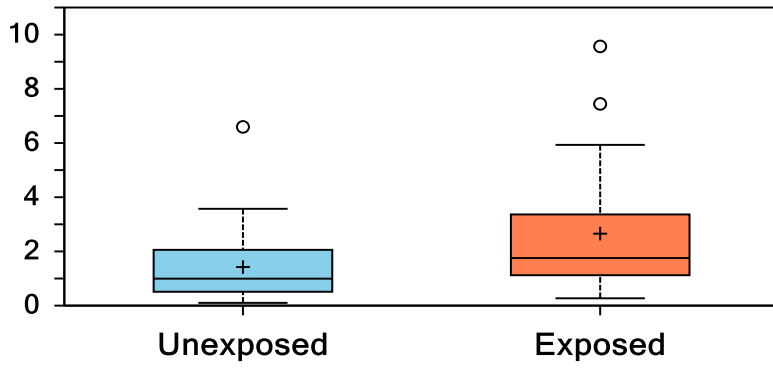

### 17beta-estradiol-17beta-O-sulfate

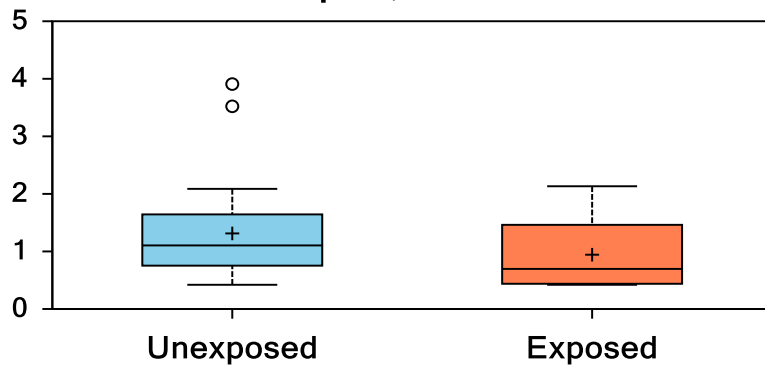

### 17beta-estradiol-17beta-O-sulfate

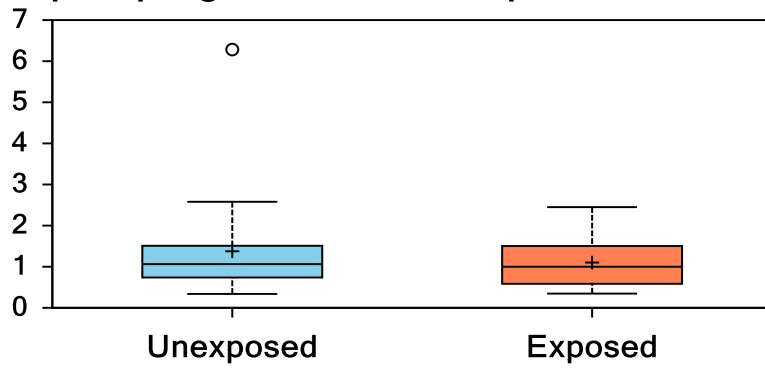

5-dodecenoate (12:1n7)

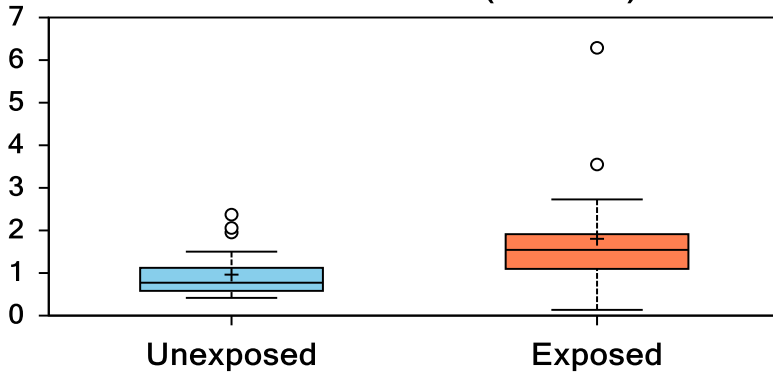

5-hydroxyindoleacetate

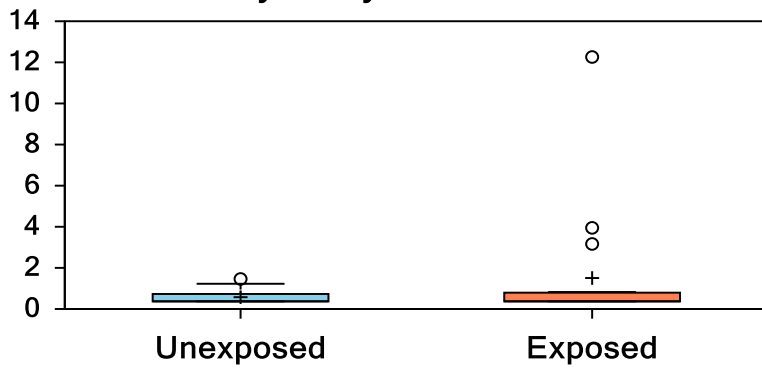

5-oxoproline

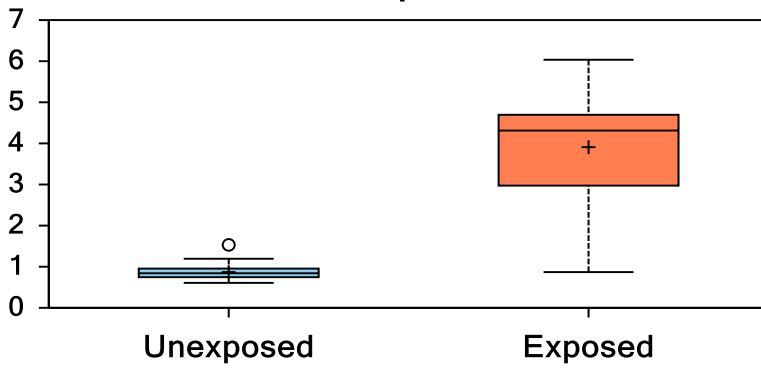

7-alpha-hydroxycholesterol

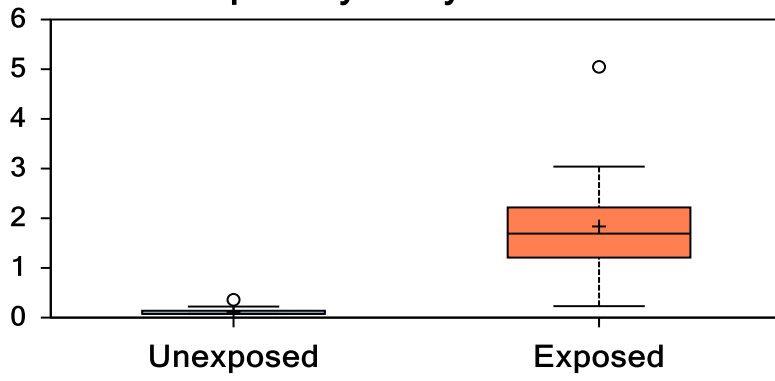

7-ketodeoxycholate

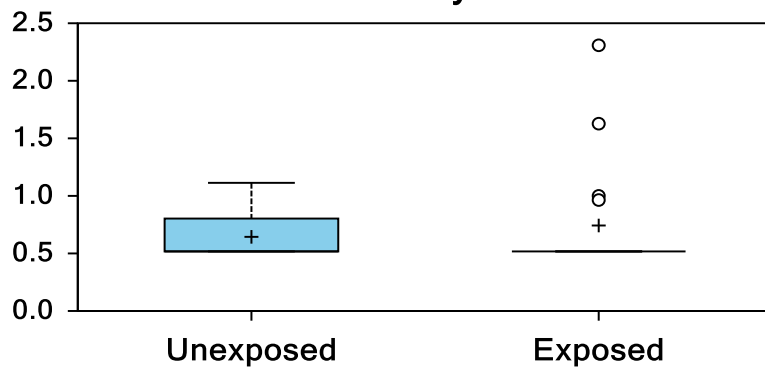

9,10-epoxystearate

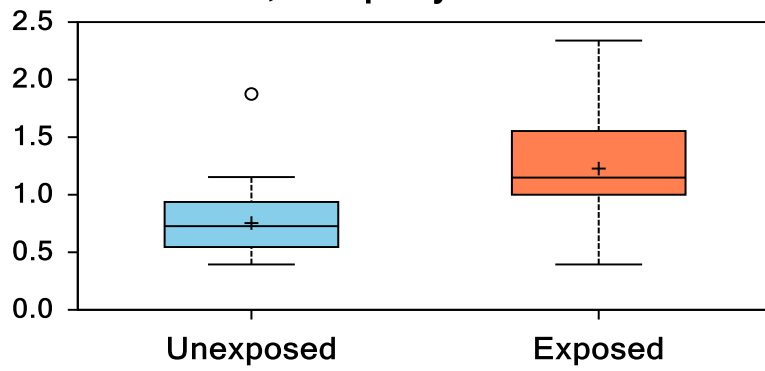

### acetylphosphate

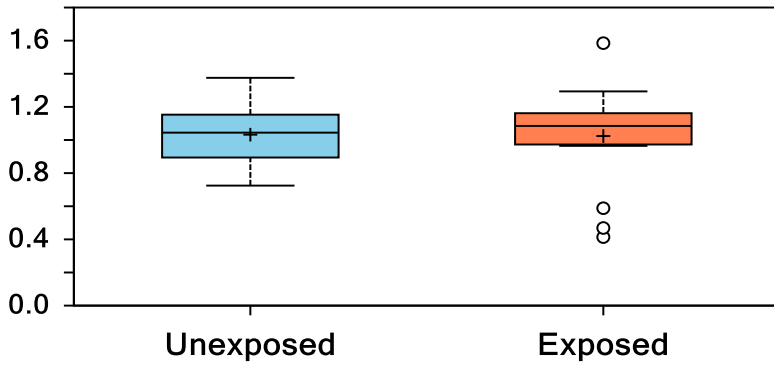

### adenosine 5'-monophosphate (AMP)

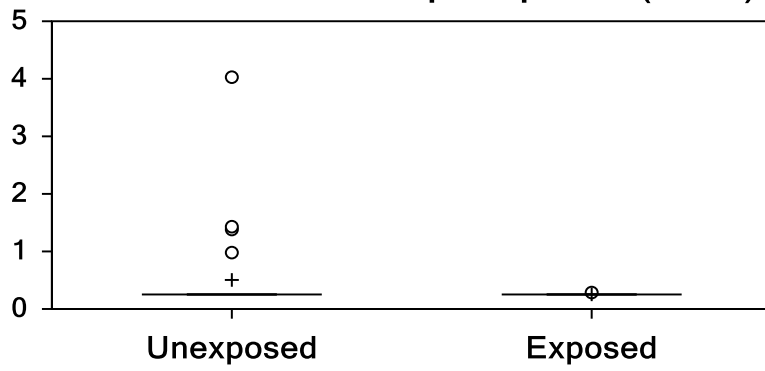

### adrenate (22:4n6)

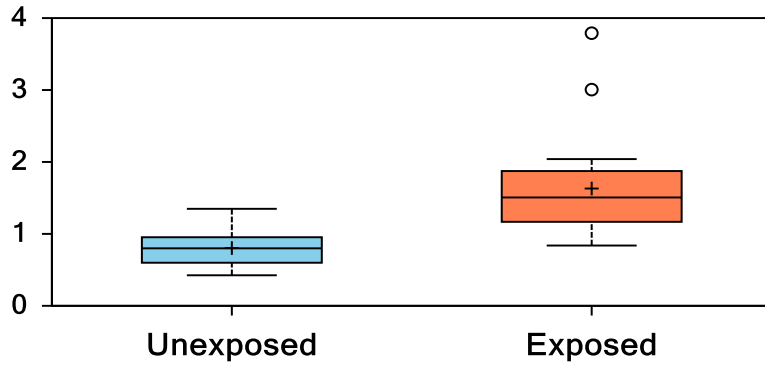

alanylalanine

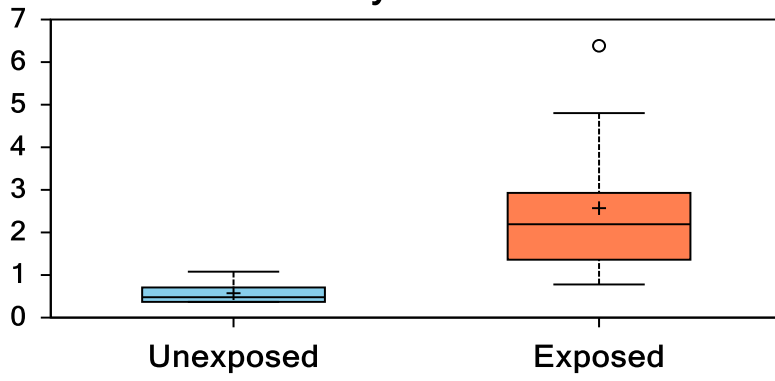

allantoin

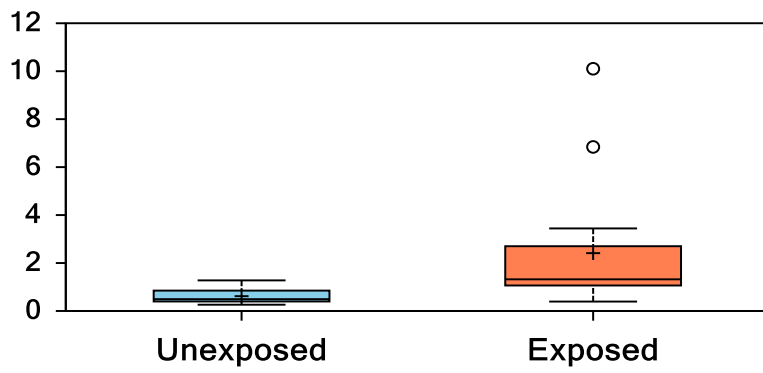

alpha-glutamylvaline

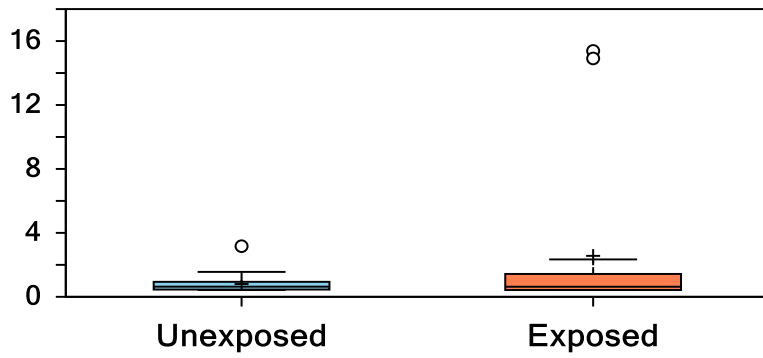

### alpha-ketobutyrate

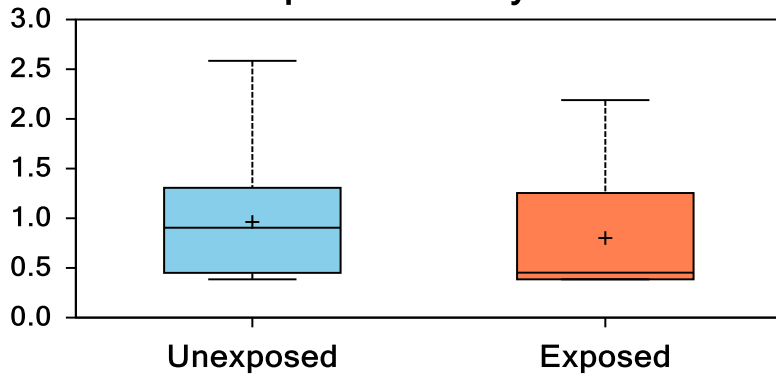

### anthranilate

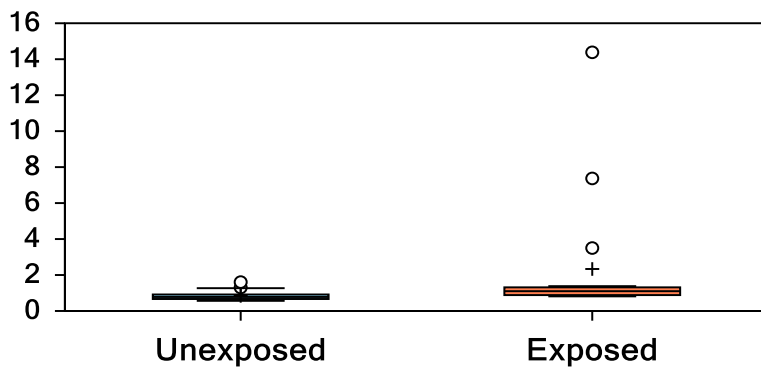

### arabonate

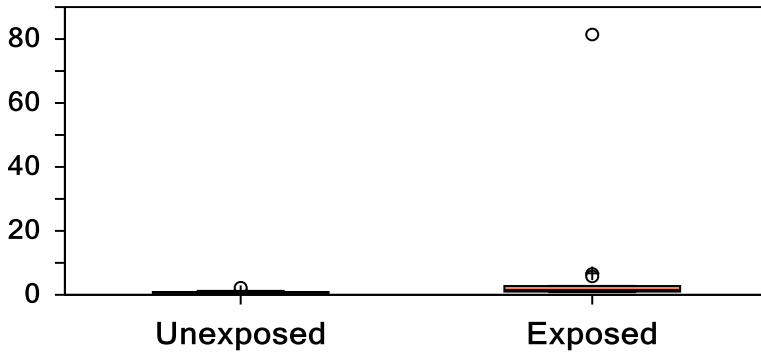



### arginylisoleucine

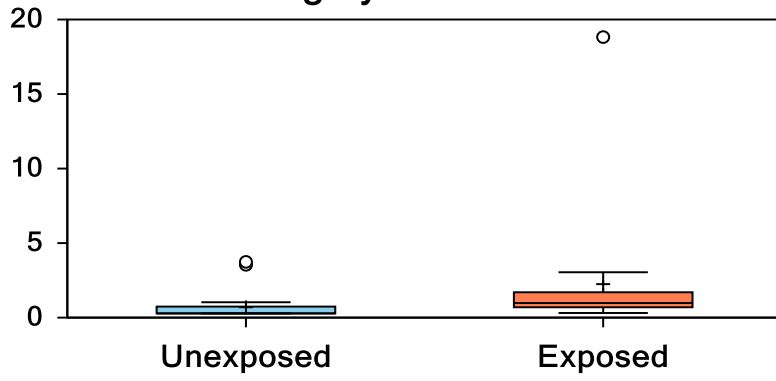

### aspartame

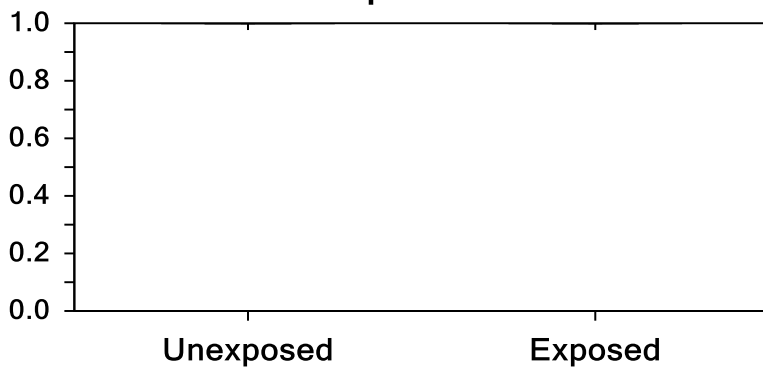

### aspartylphenylalanine

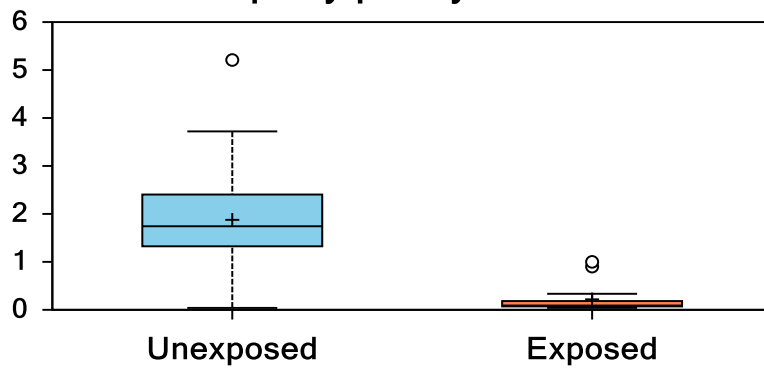

### benzoate

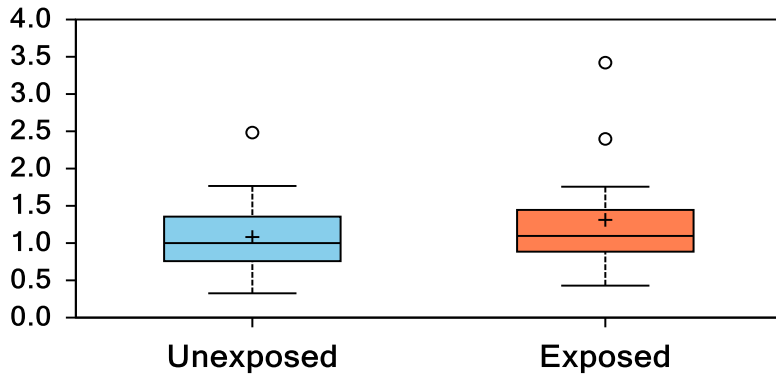

### beta-hydroxypyruvate

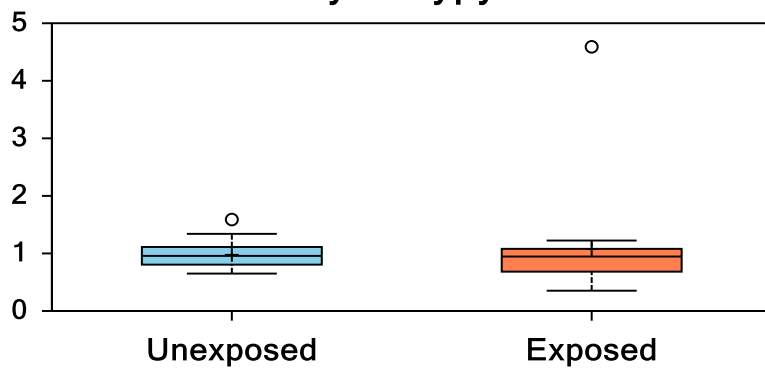

### bilirubin (E,E)\*

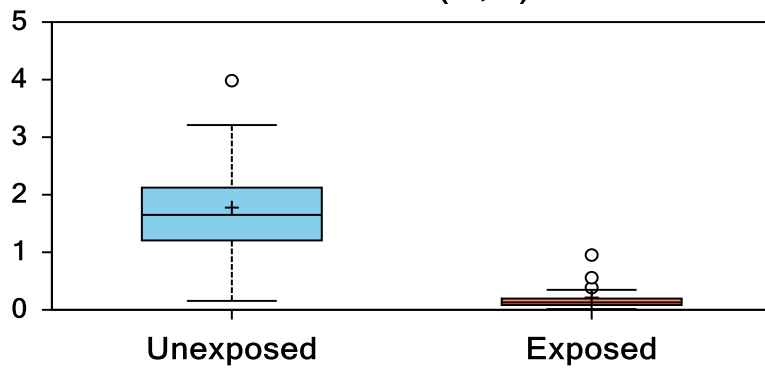

### biliverdin

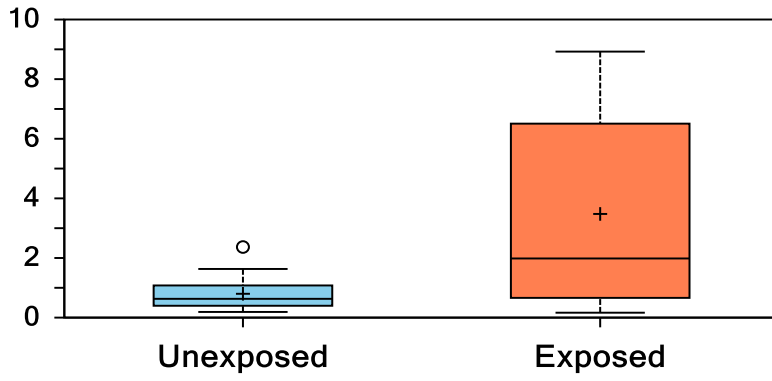

### bradykinin, hydroxy-pro(3)

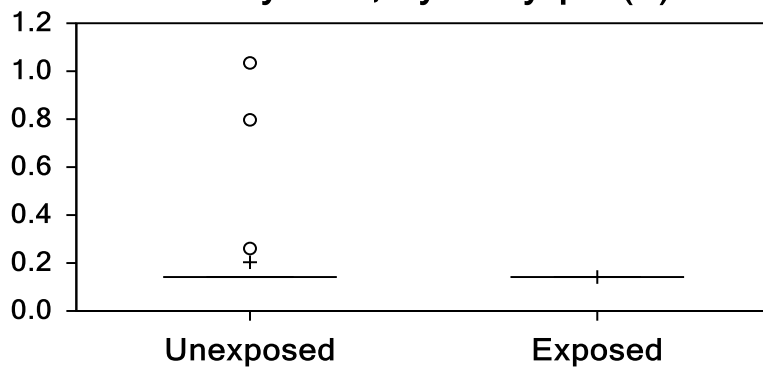

### campesterol

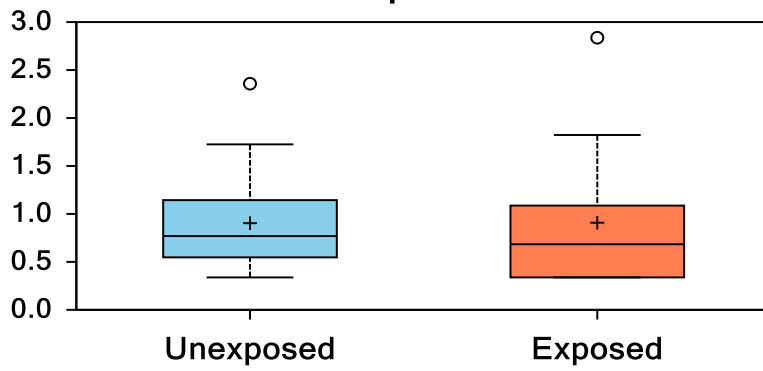

caprylate (8:0)

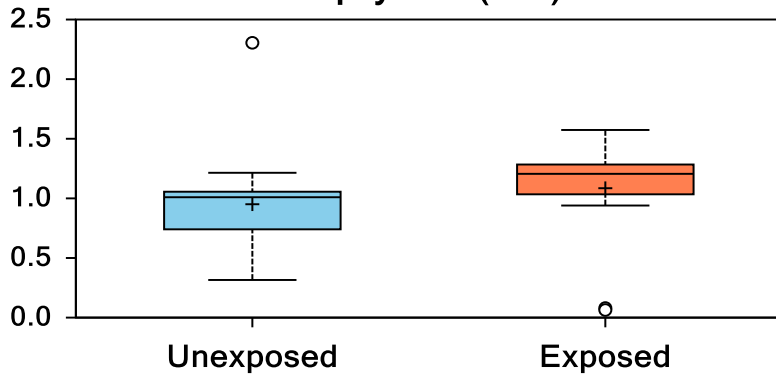

C-glycosyltryptophan\*

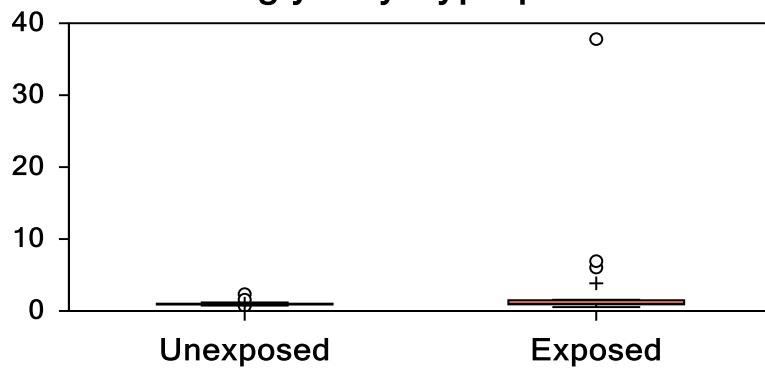

cholesterol

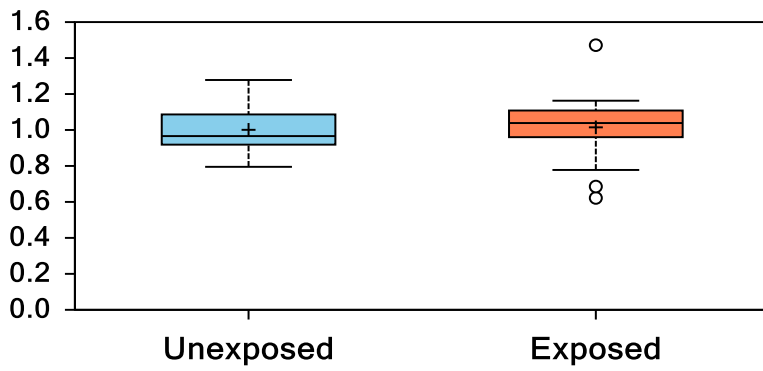

### cinnamoylglycine

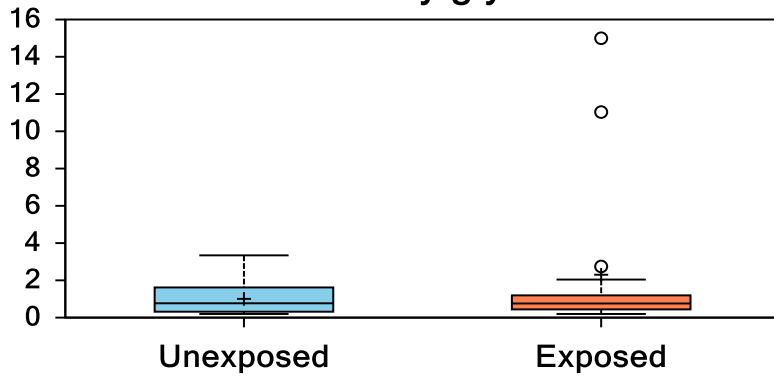

### cis-vaccenate (18:1n7)

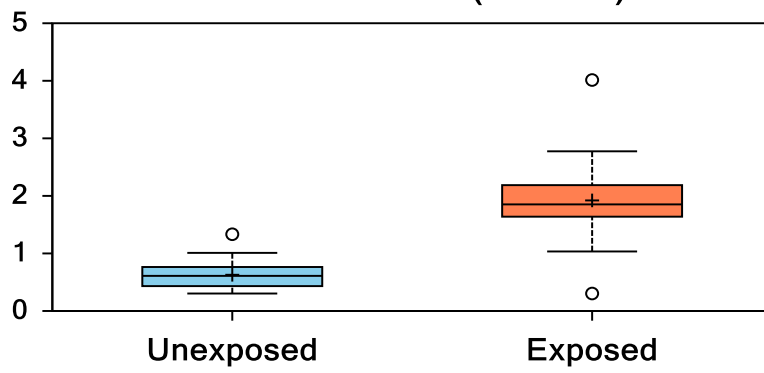

### citrate

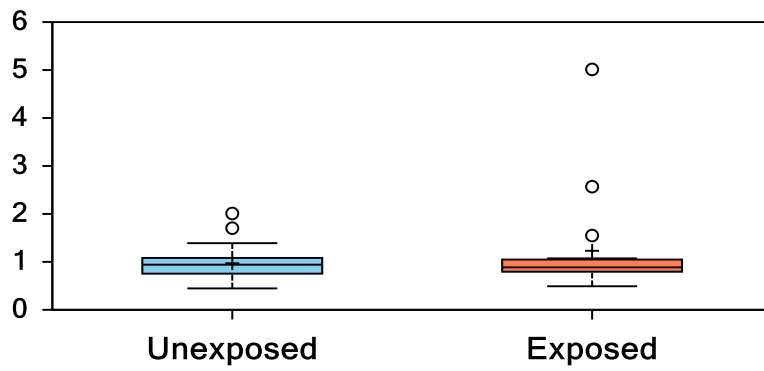

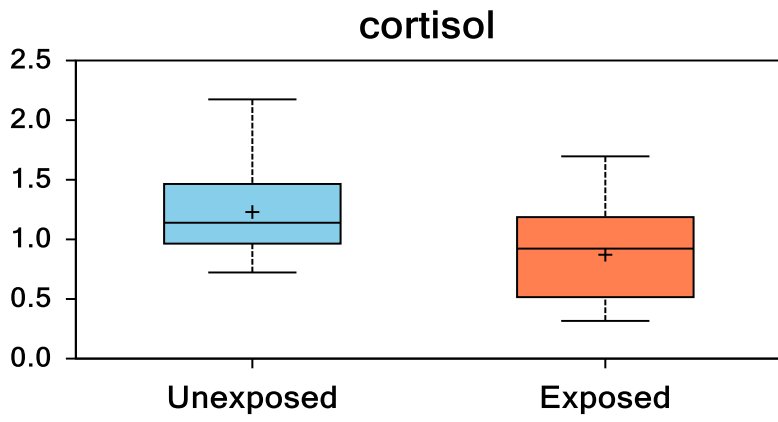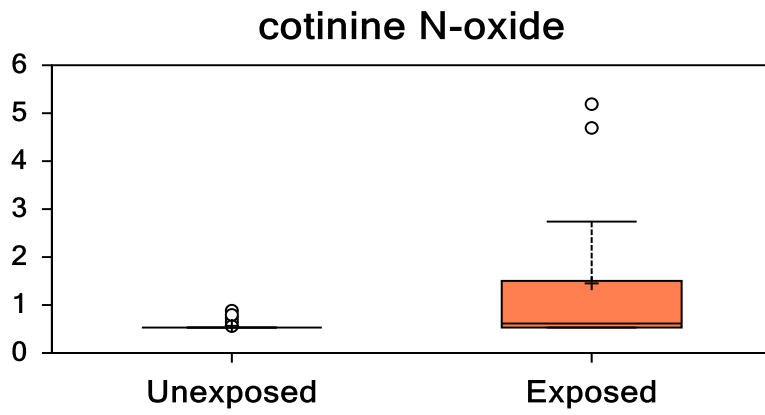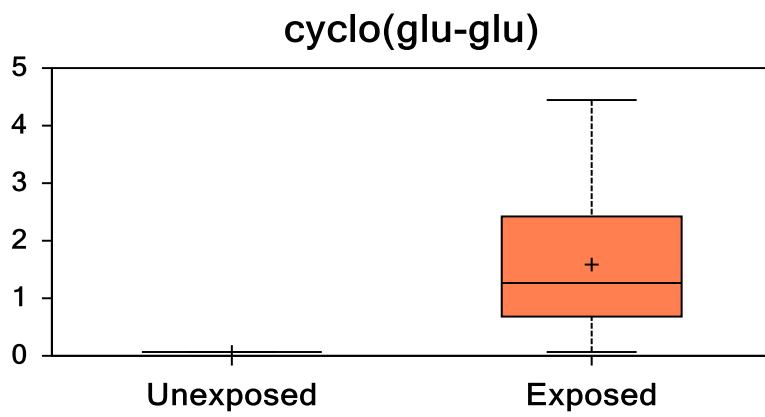

**cyclo(phe-pro)**

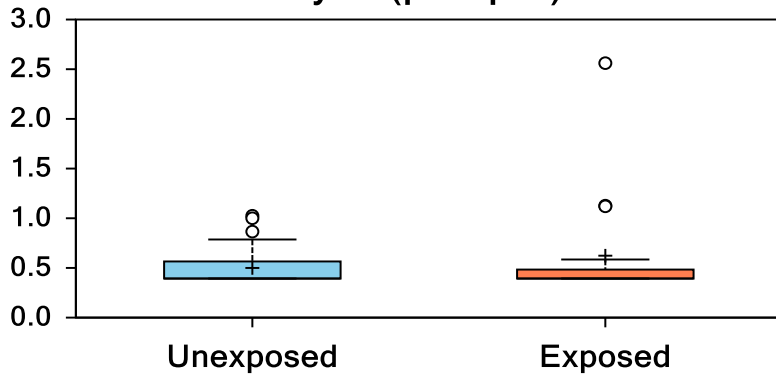

**decanoylcarnitine**

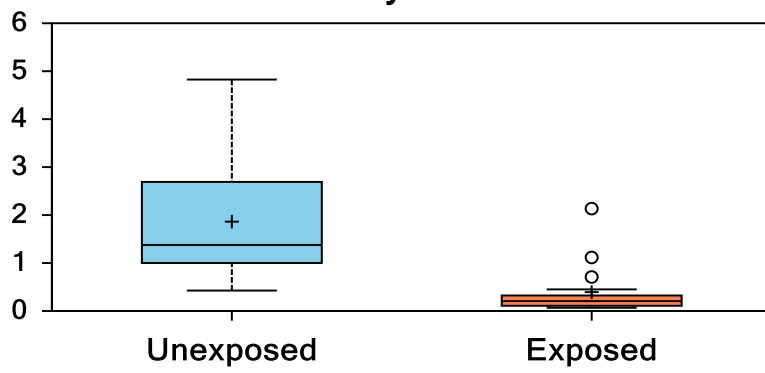

**deoxycholate**

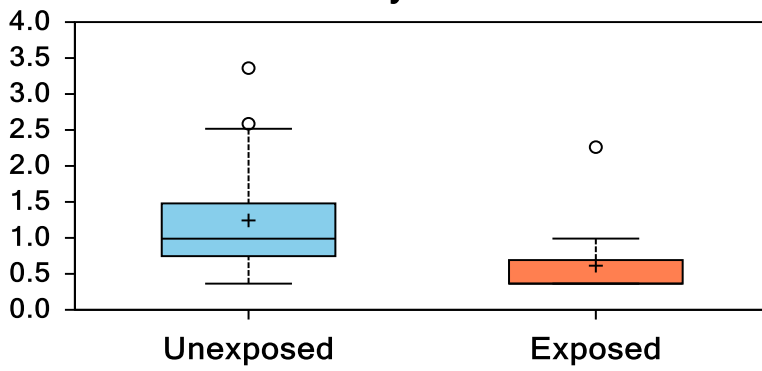

dihomo-linoleate (20:2n6)

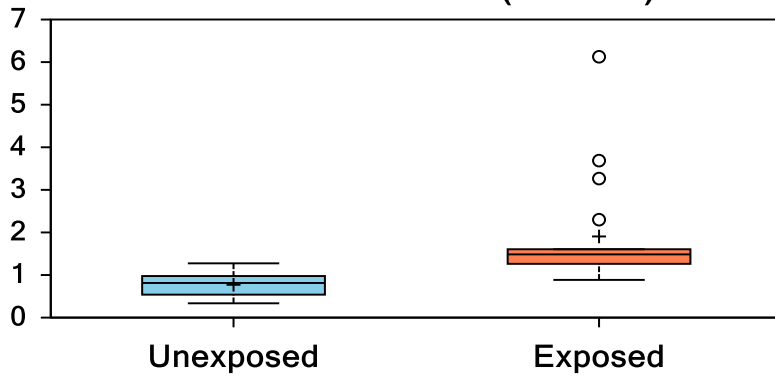

dimethylarginine (SDMA + ADMA)

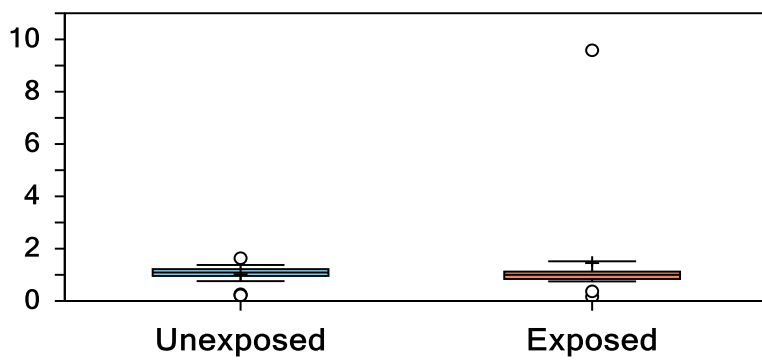

docosadienoate (22:2n6)

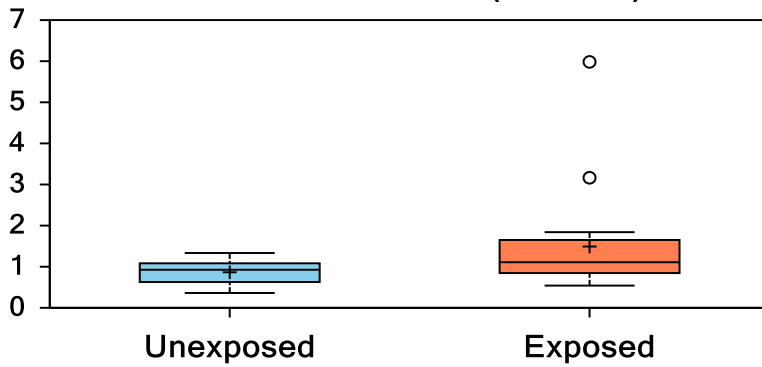



docosapentaenoate (n6 DPA; 22:5n6)

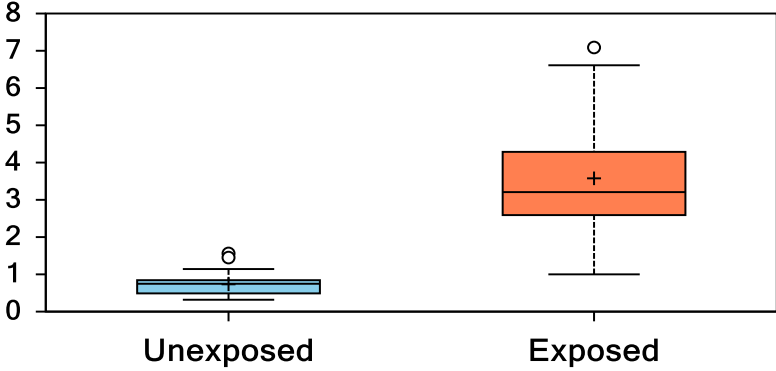

ectoine

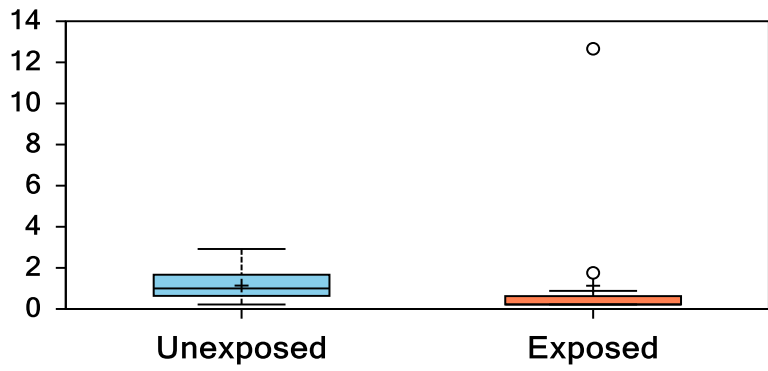

eicosenoate (20:1n9 or 11)

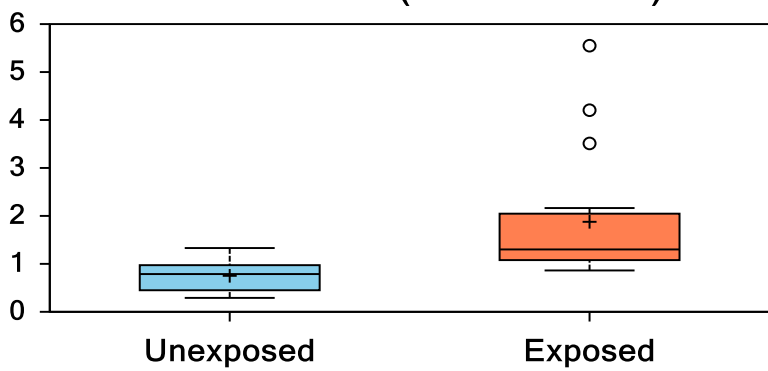

### erythritol

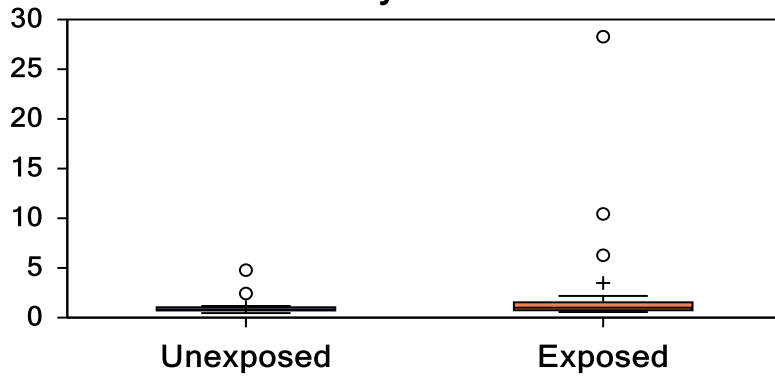

### ethyl glucuronide

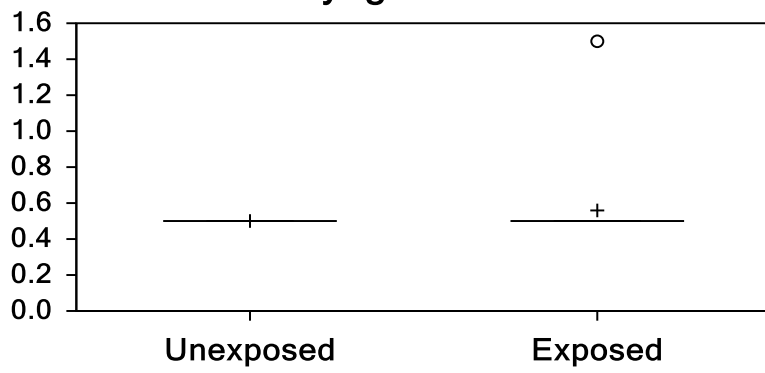

### fumarate

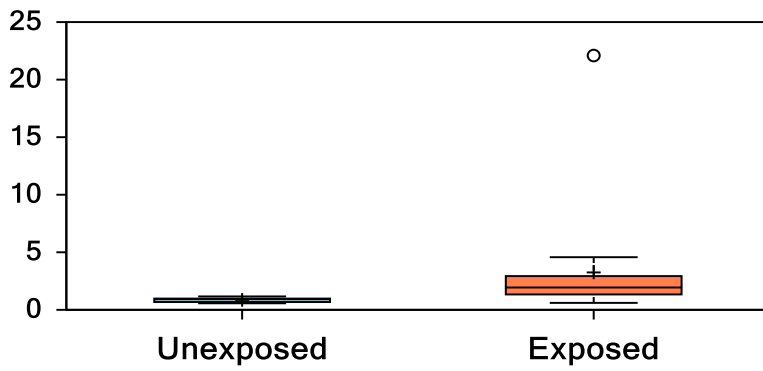

**gamma-glutamylalanine**

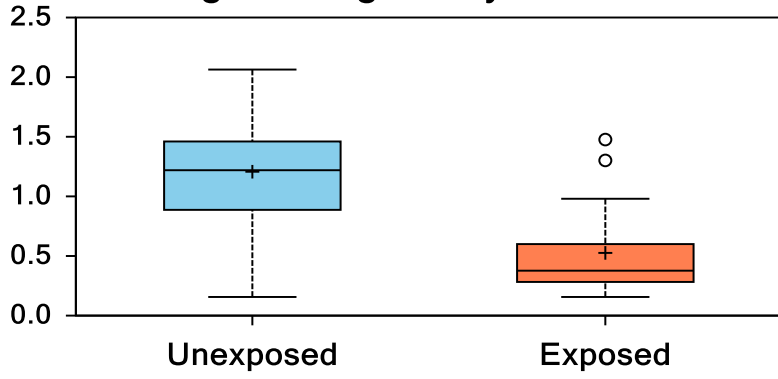

**gamma-glutamylisoleucine\***

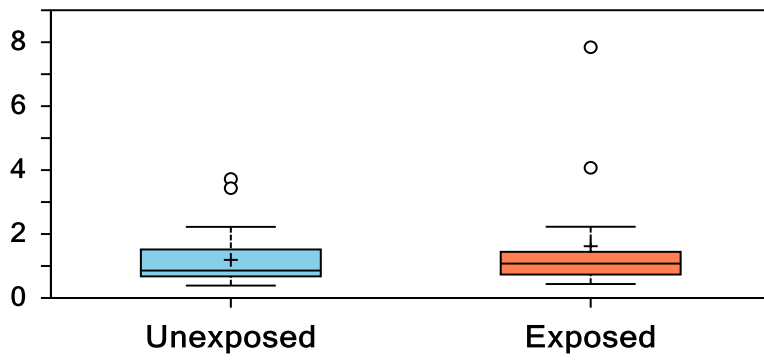

**gamma-glutamylphenylalanine**

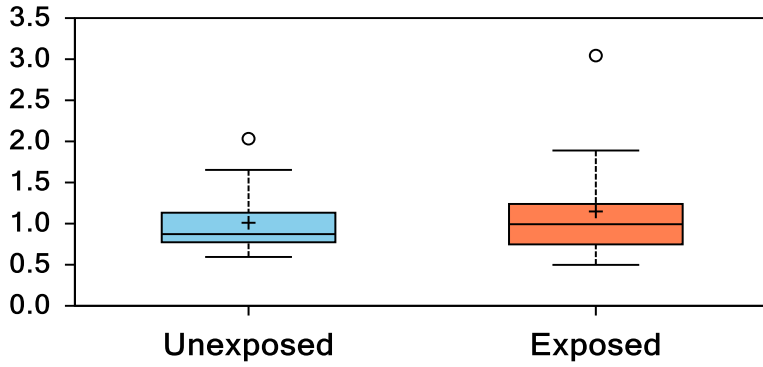

**gamma-glutamyltyrosine**

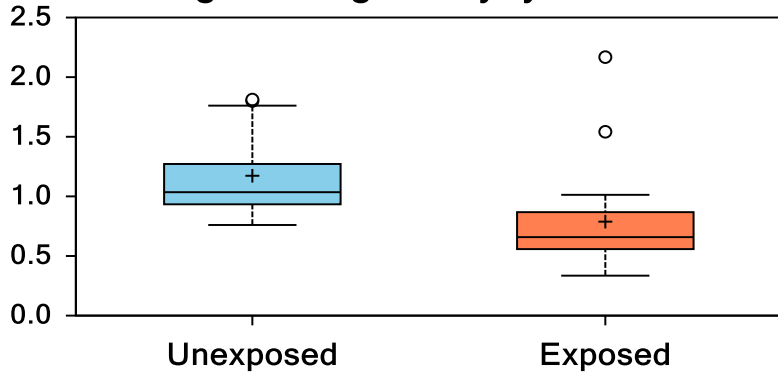

**gentisate**

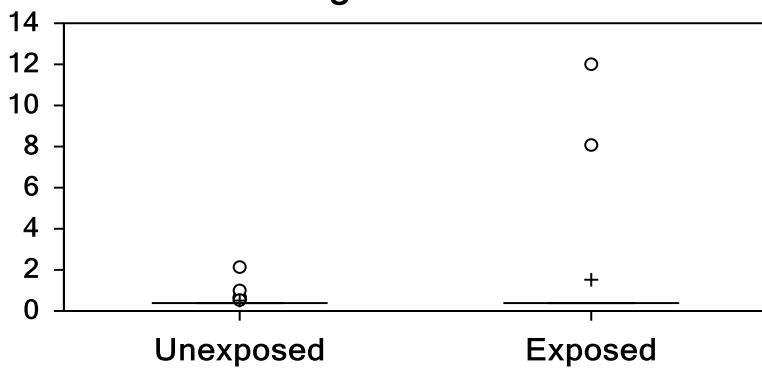

**glucose**

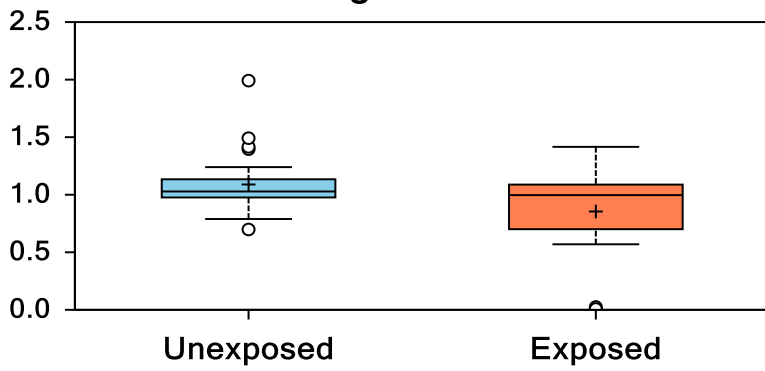

### glutamine

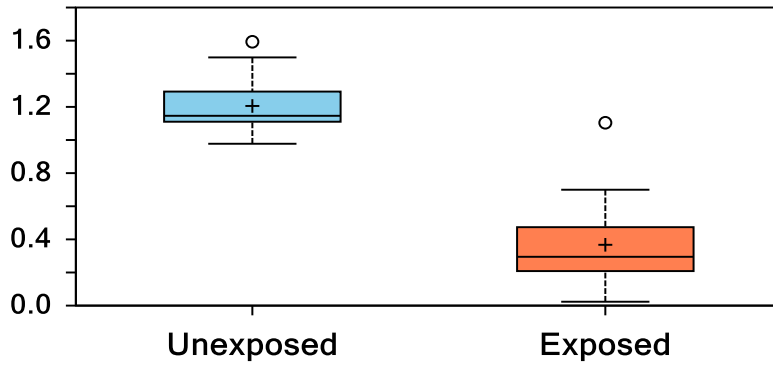

### glycerate

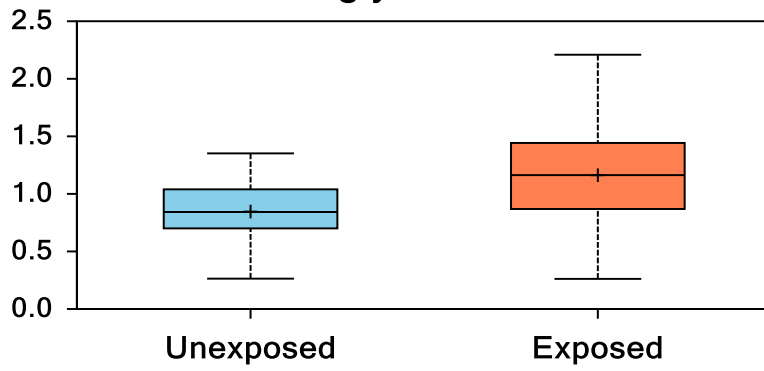

### glycerol 3-phosphate (G3P)

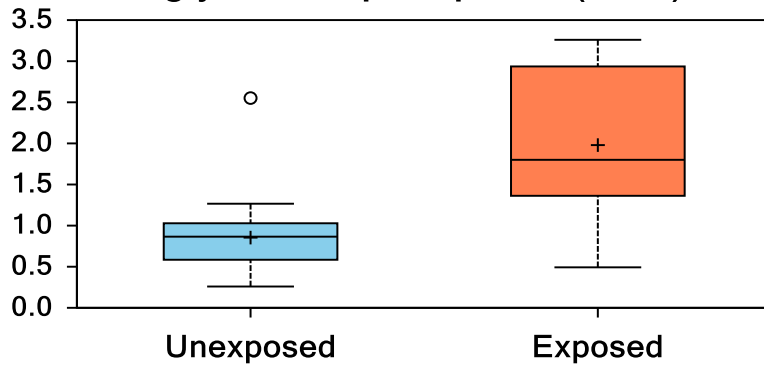

glycochenodeoxycholate

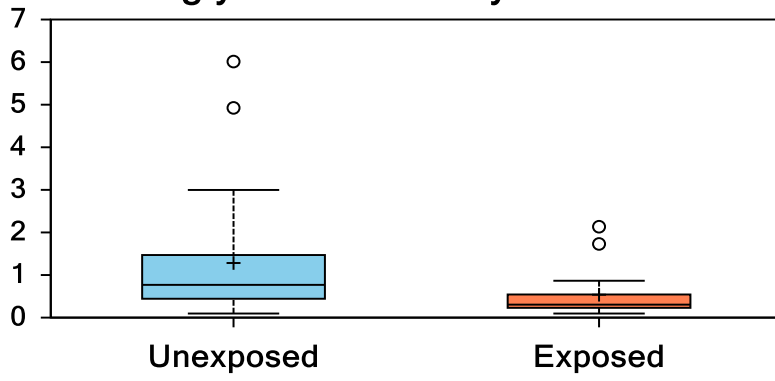

glycodeoxycholate

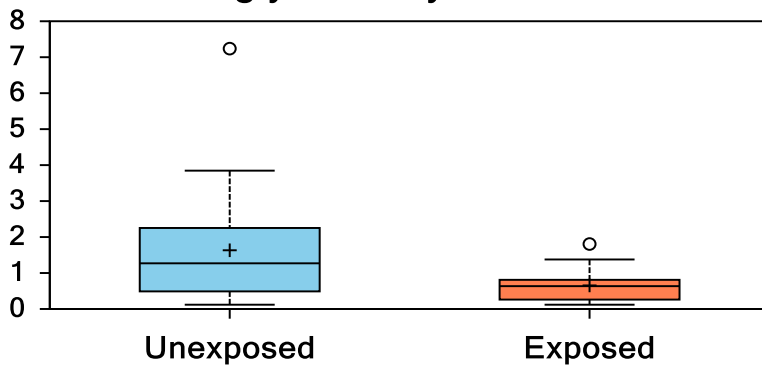

glycoursodeoxycholate

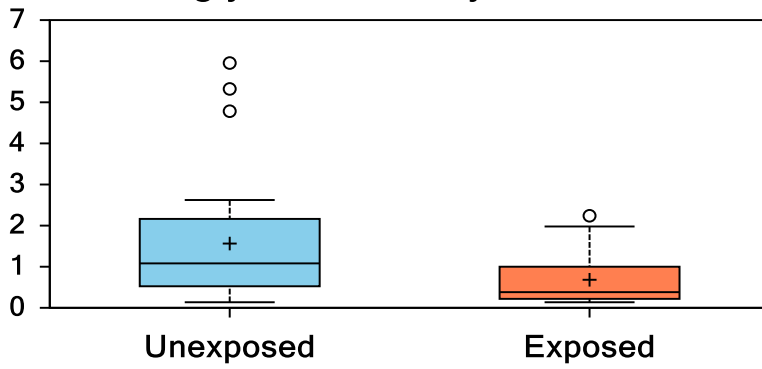

glycylproline

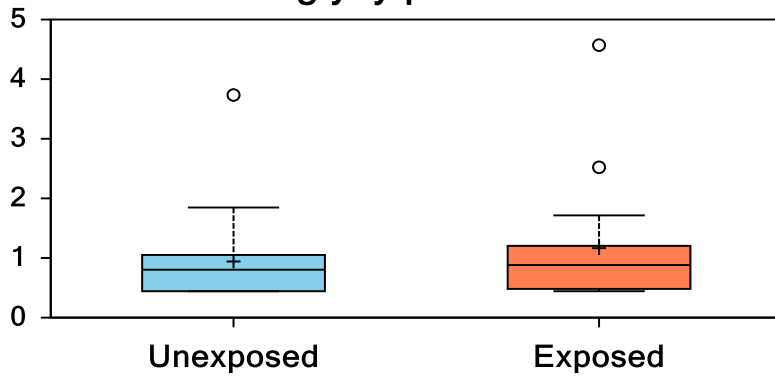

glycylvaline

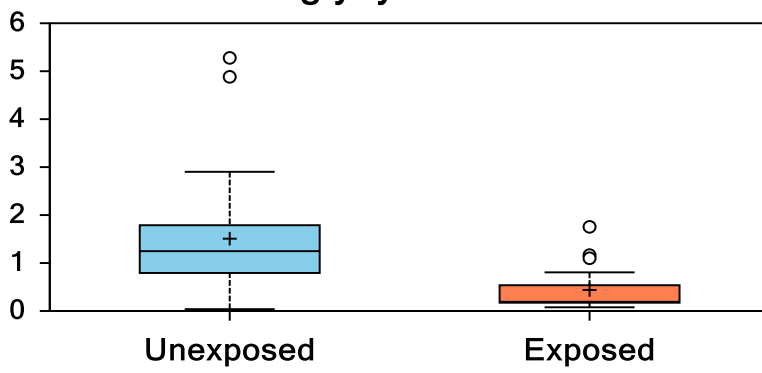

heptanoate (7:0)

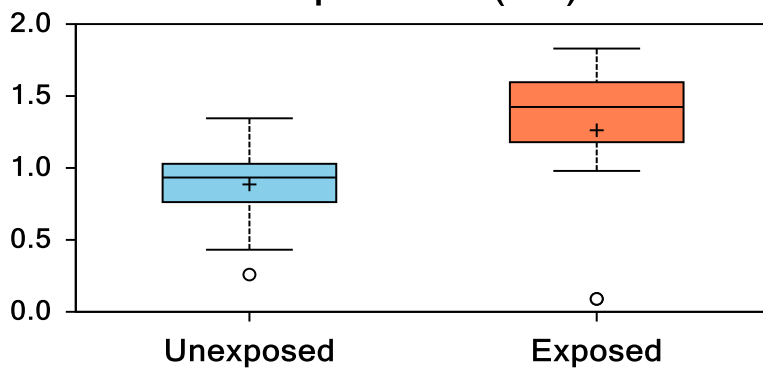

hexanoylglycine

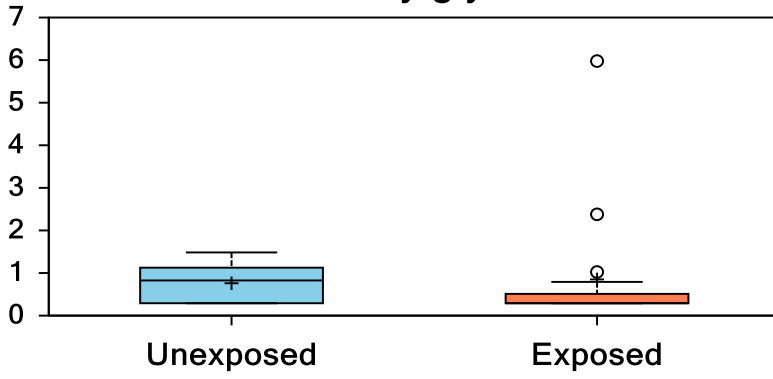

histidylleucine

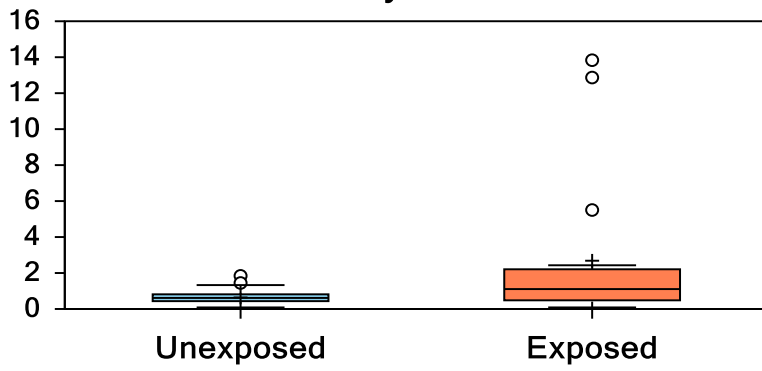

homocystine

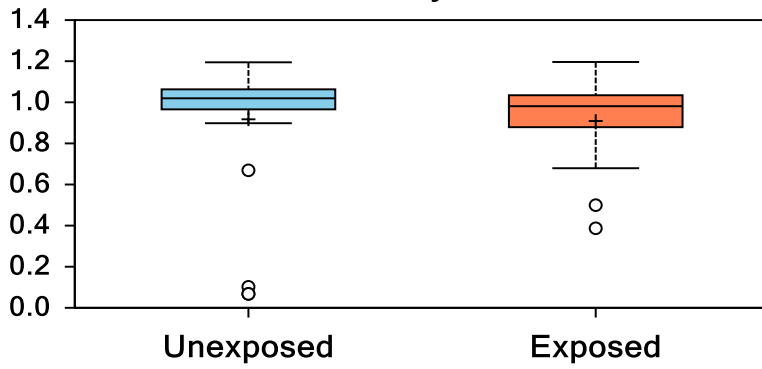



### homovanillate (HVA)

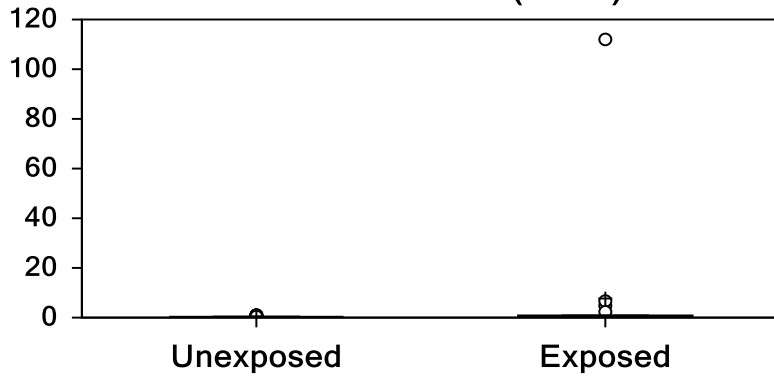

### hydantoin-5-propionic acid

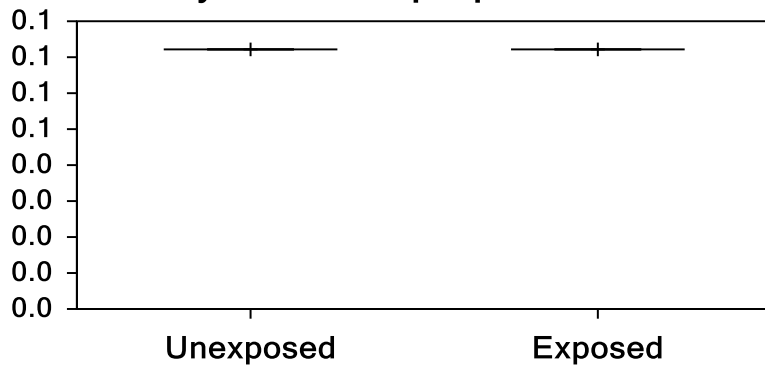

### hydroxycotinine

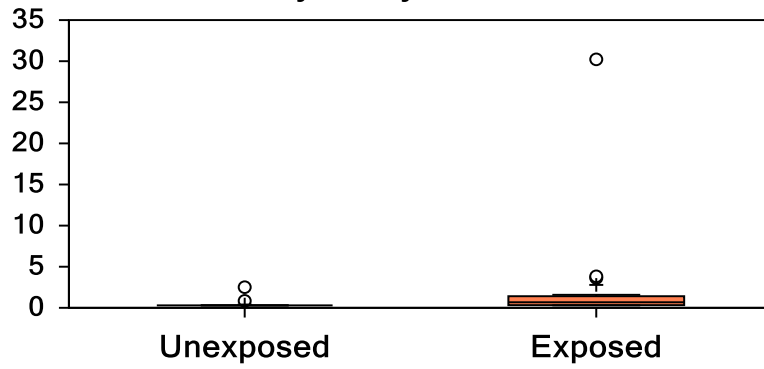

### ibuprofen

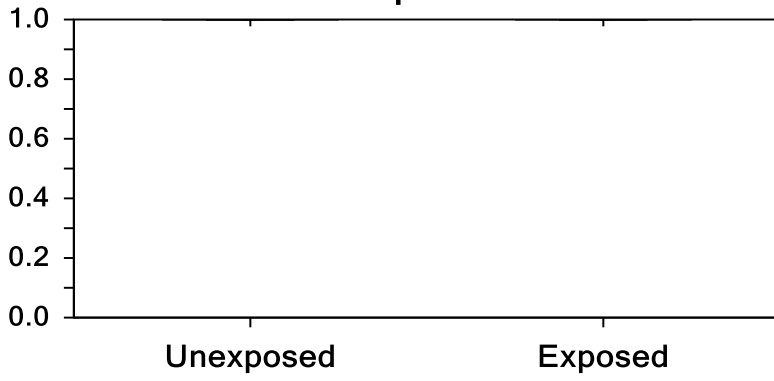

### iminodiacetate (IDA)

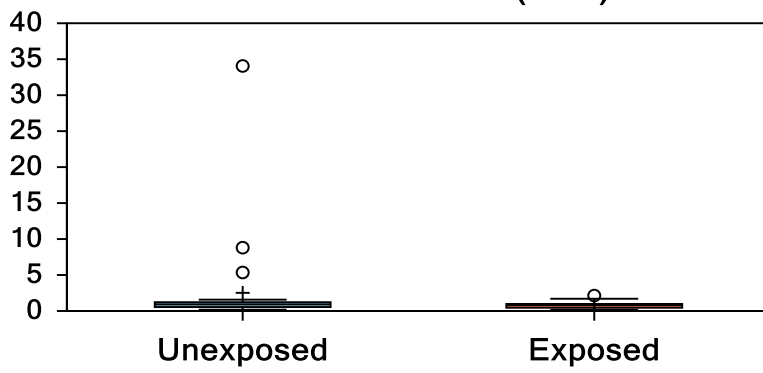

### indolelactate

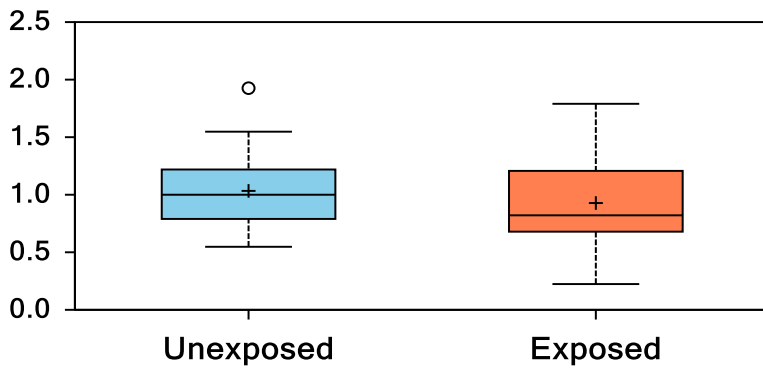

### inosine

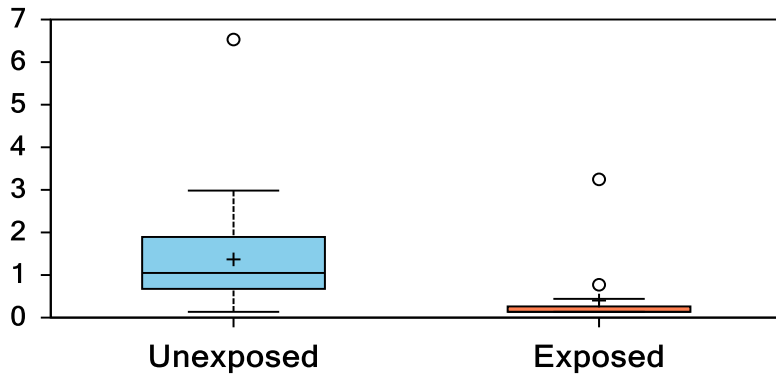

### prostaglandin A2, B2 and 13,14-dihydro-15-keto-p

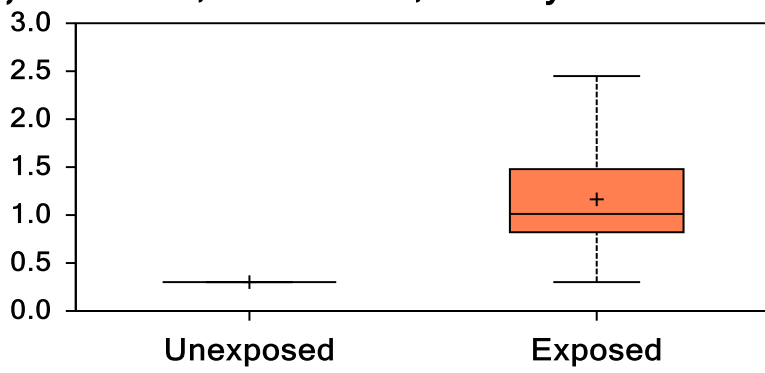

### isoleucine

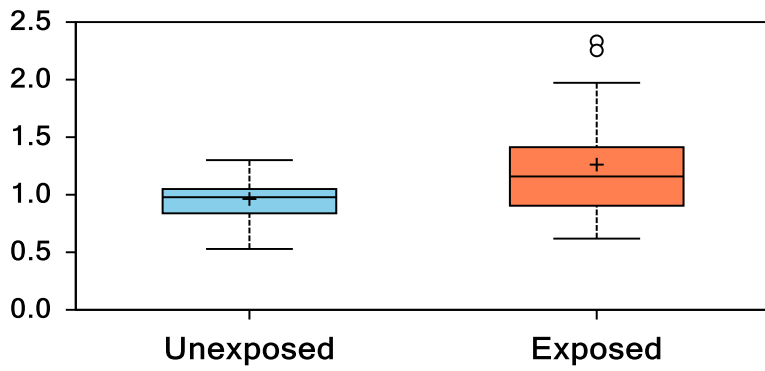

### isoleucylglutamine

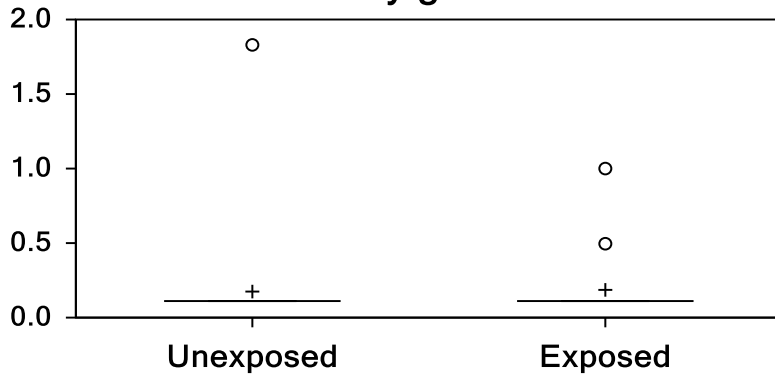

### isoleucylisoleucine

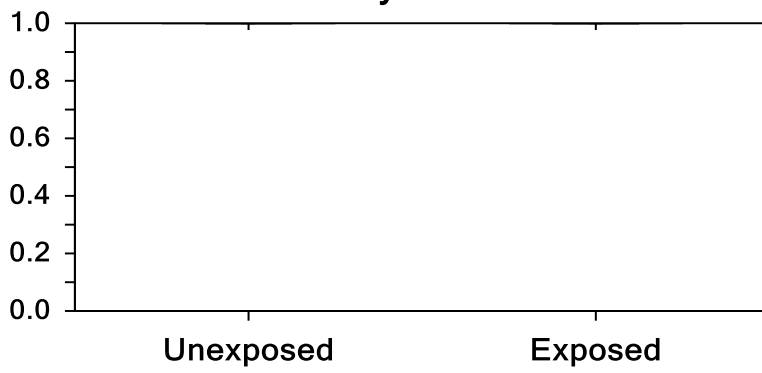

### isoleucylproline

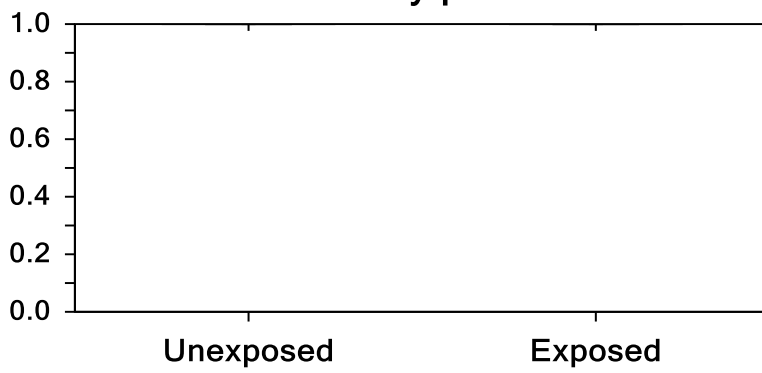

### isopalmitic acid

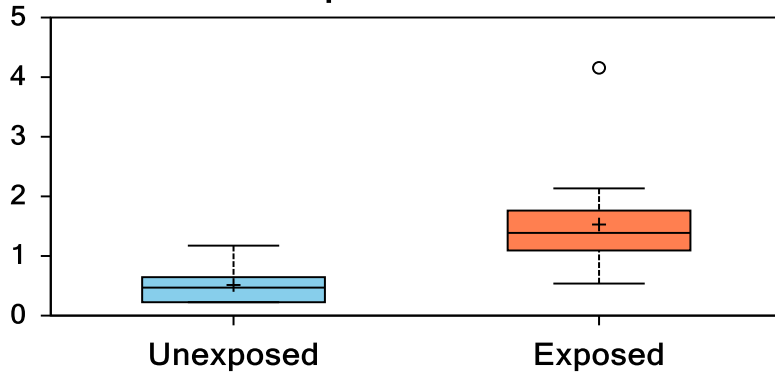

### isovalerylglycine

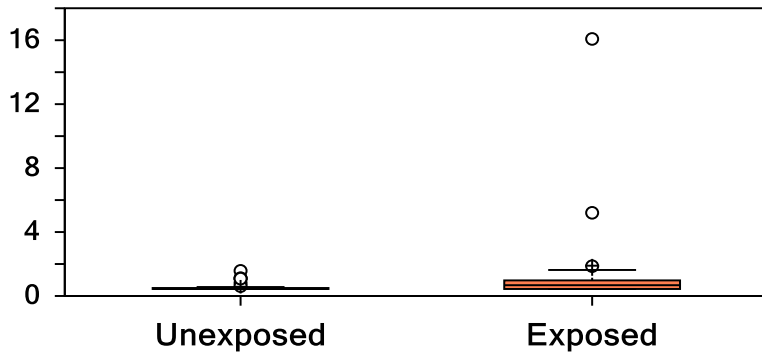

### kynurenine

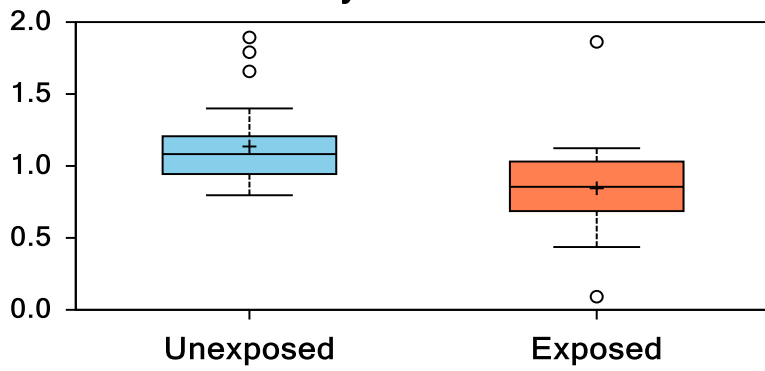

### lathosterol

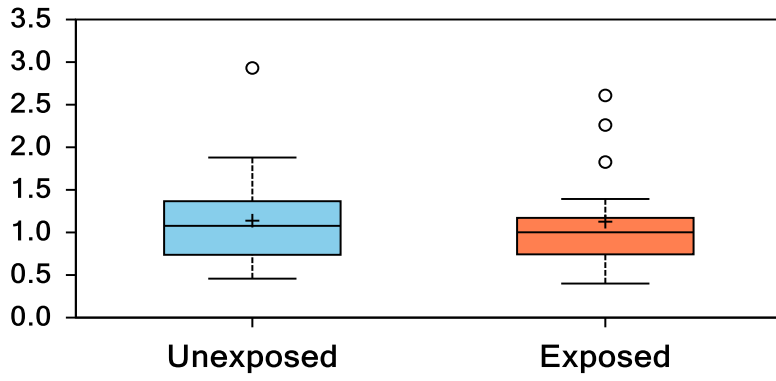

### leucine

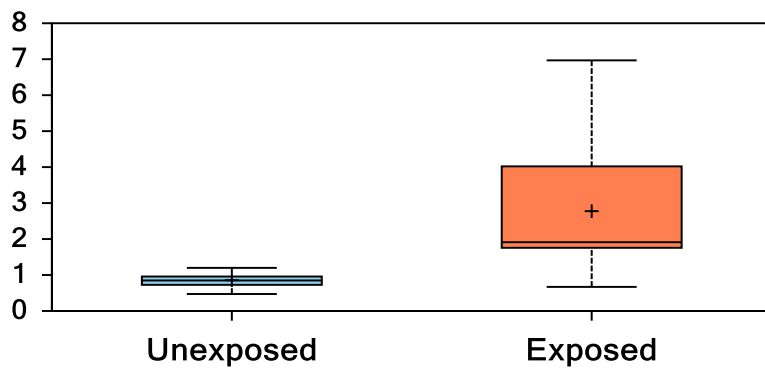

### leucylasparagine

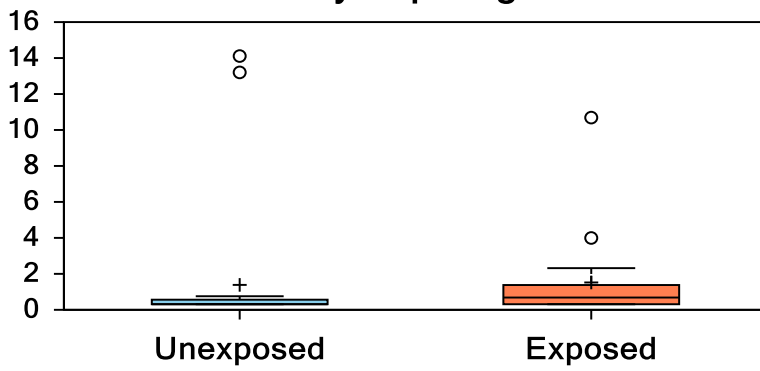

### leucylglycine

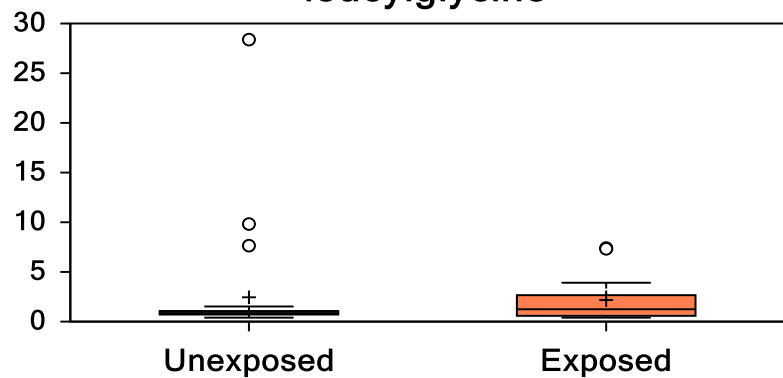

### leucylproline

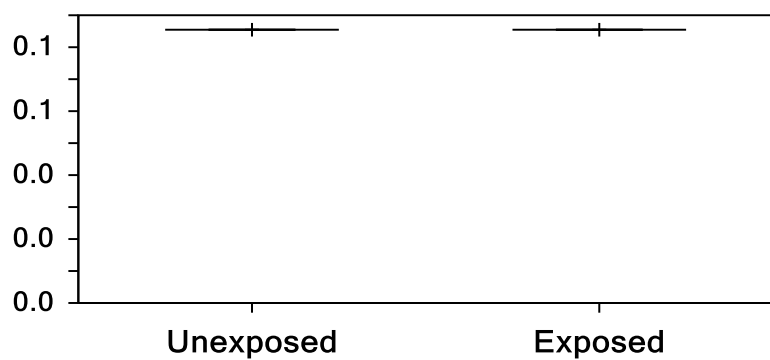

### leucyltyrosine

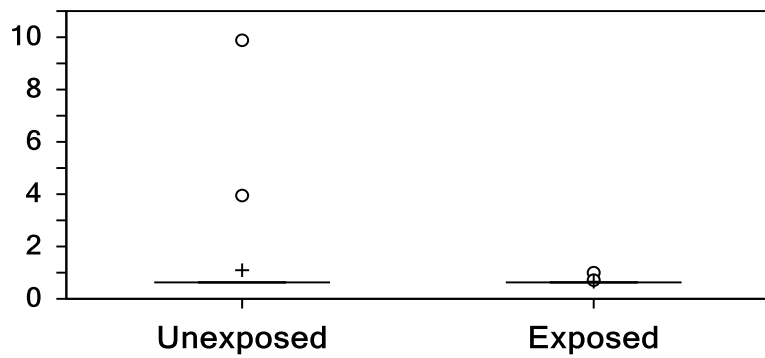

### lidocaine

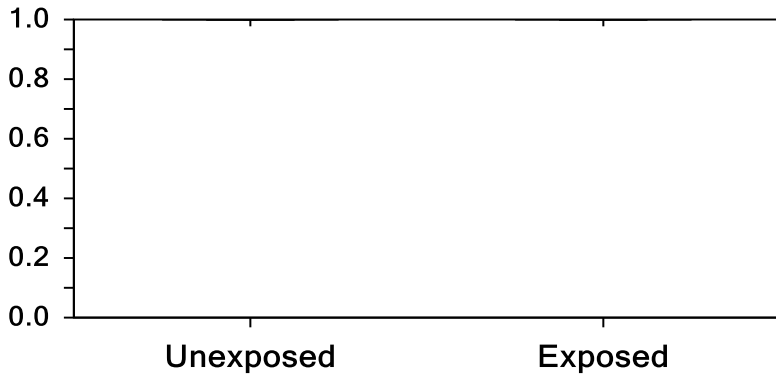

### linoleate (18:2n6)

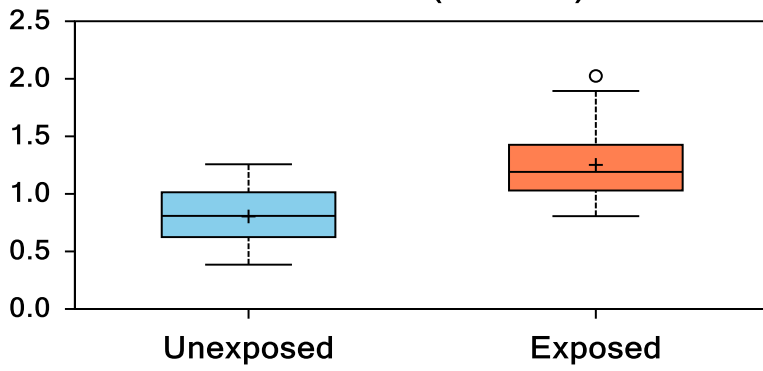

### lysine

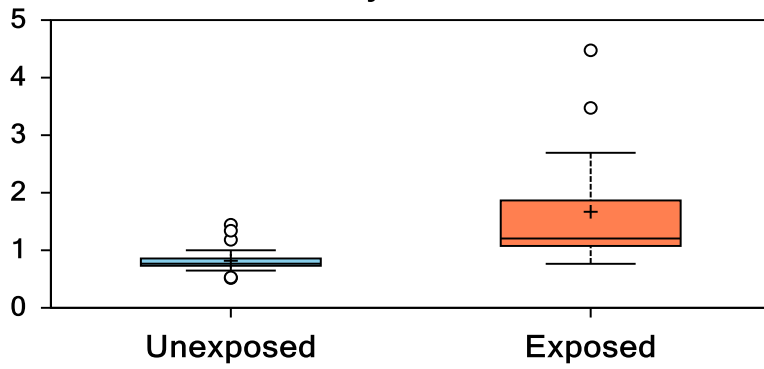



**maltotriose**

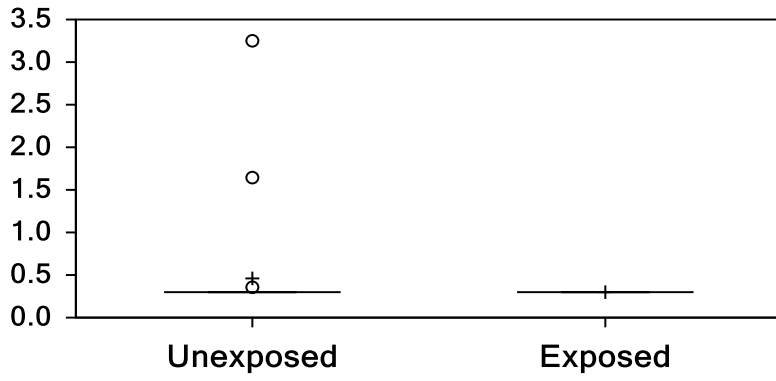

**mannose**

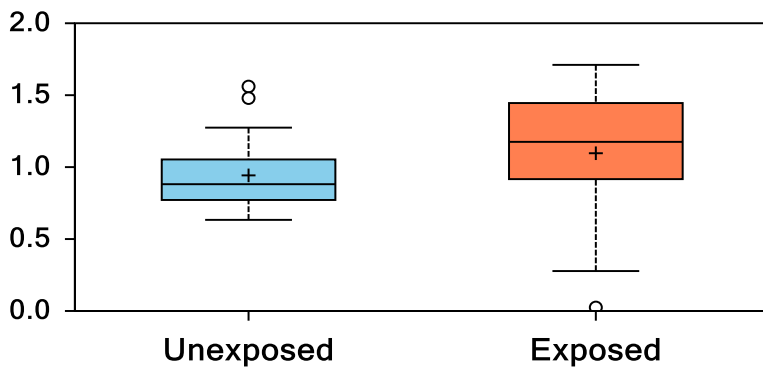

**methionine**

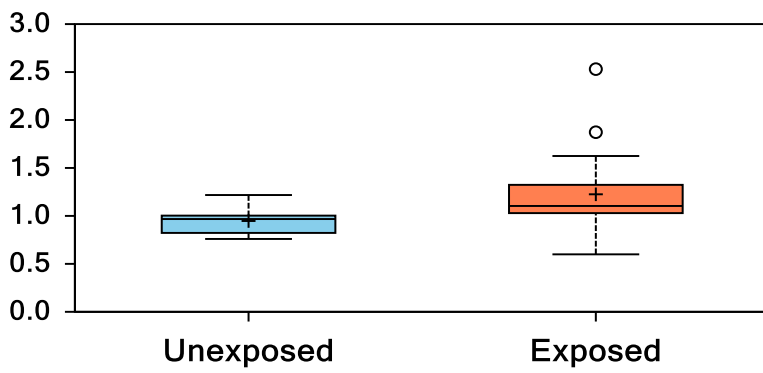

methionylleucine

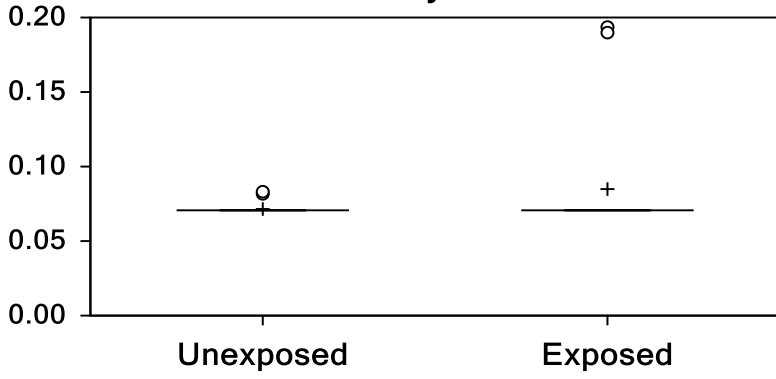

methylglutaroylcarnitine

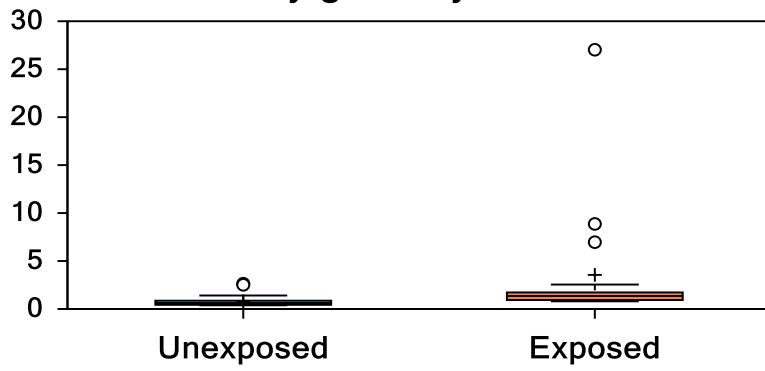

myo-inositol

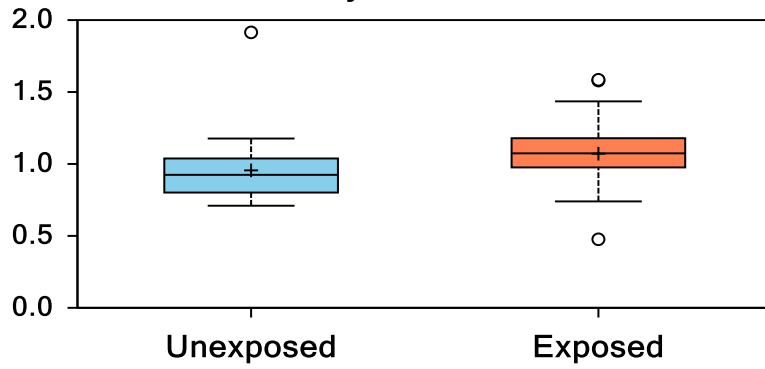

### myristoylcarnitine

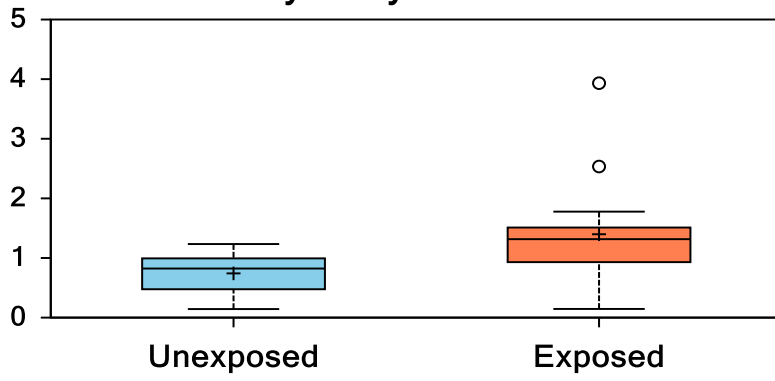

### N1-methyladenosine

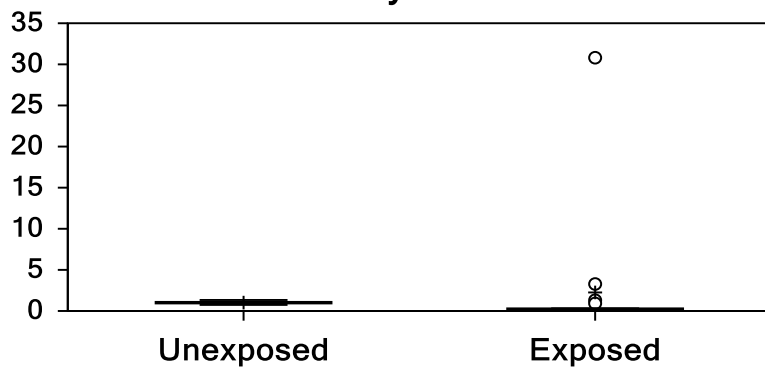

### N2-acetyllysine

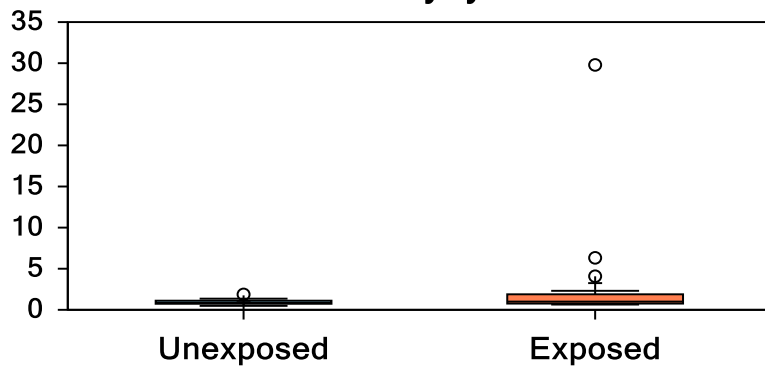

### N6-acetyllysine

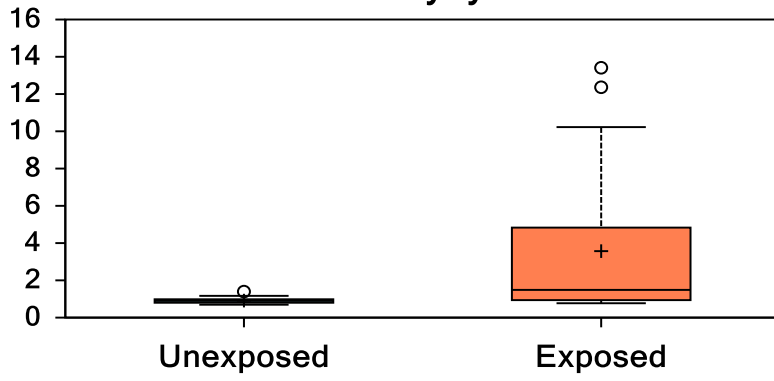

### N-6-trimethyllysine

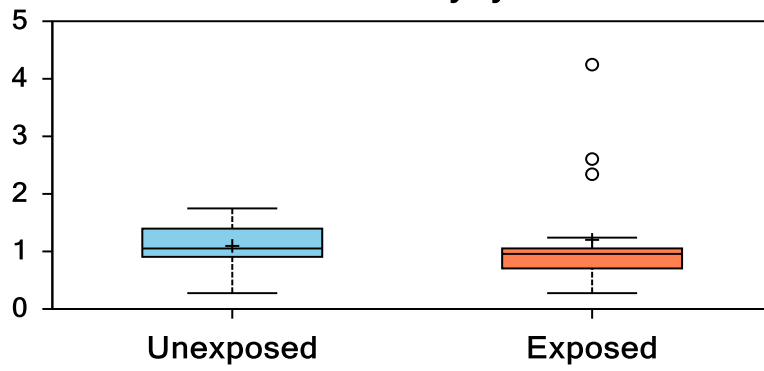

### N-acetyl-aspartyl-glutamate (NAAG)

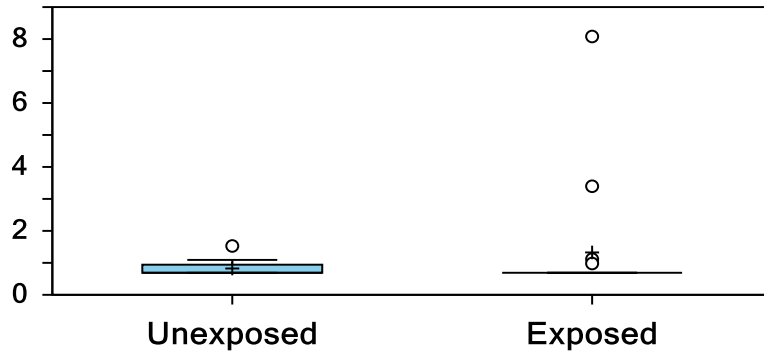

N-acetylglucosamine

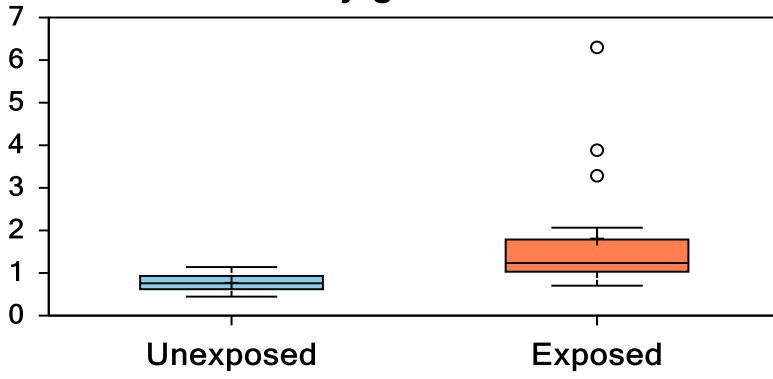

N-acetylisooleucine

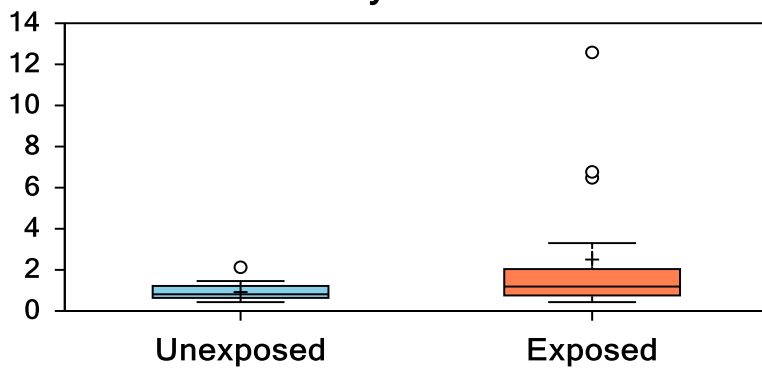

N-acetylneuraminic acid

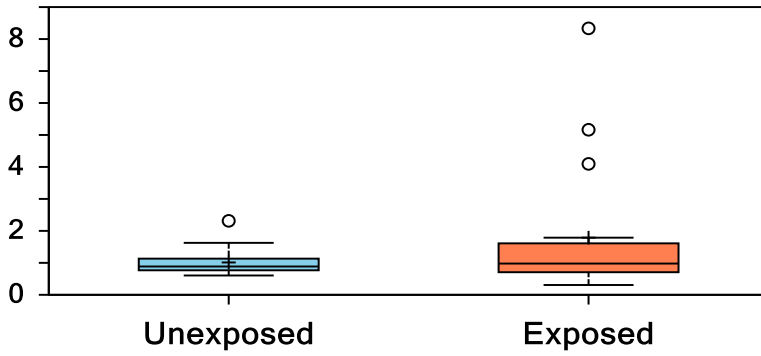

### N-acetylputrescine

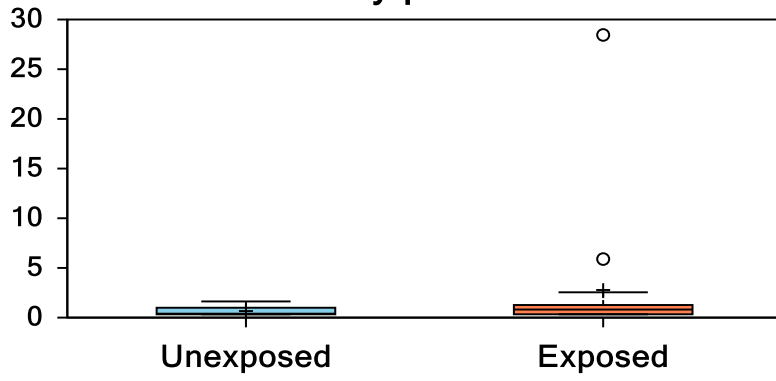

### N-acetyltryptophan

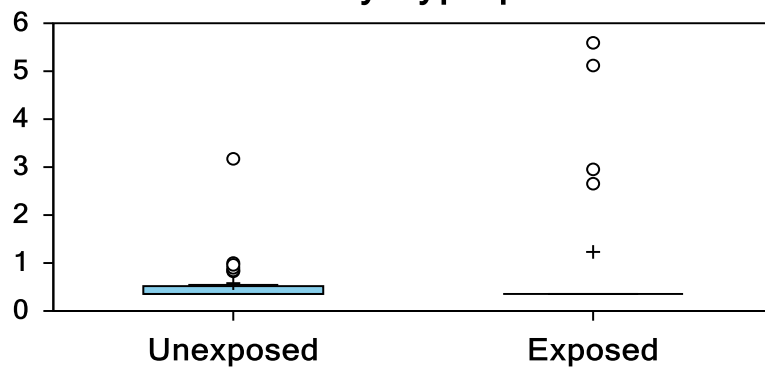

### n-Butyl Oleate

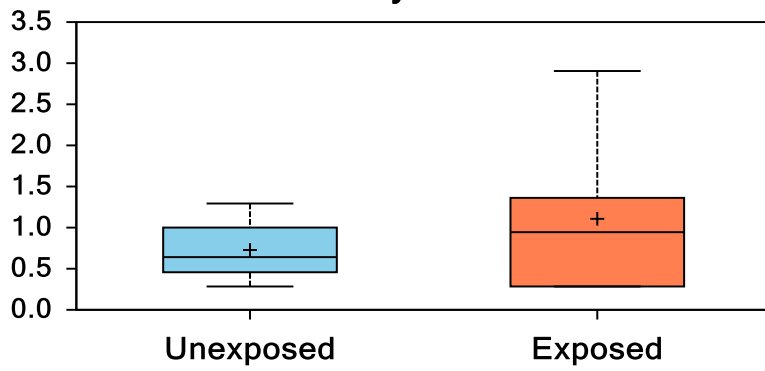

### nicotinamide

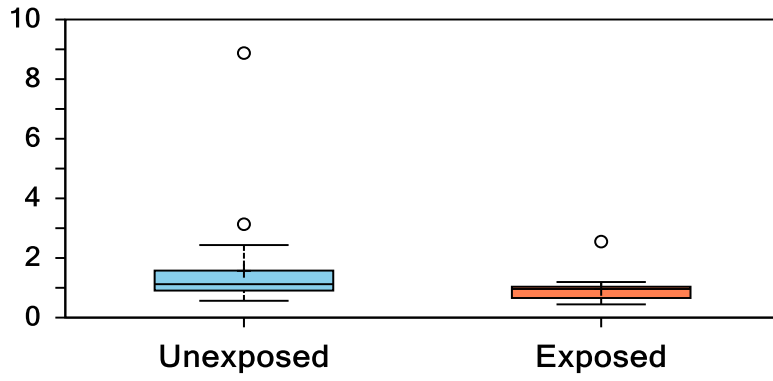

### nifedipine

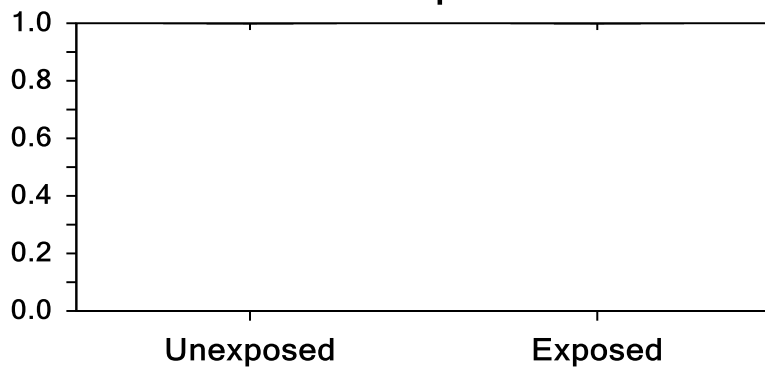

### o-cresol sulfate

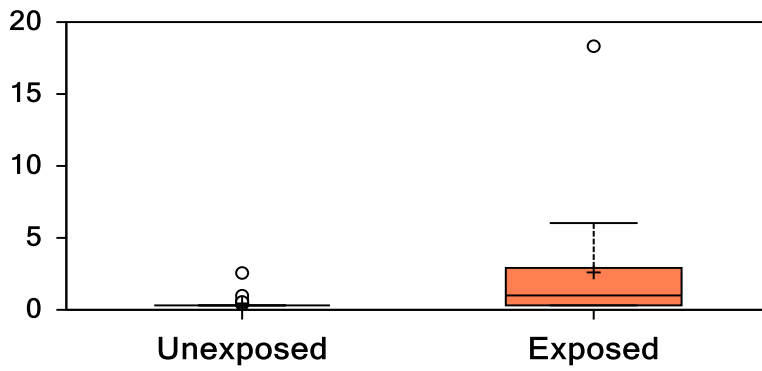

**oleate (18:1n9)**

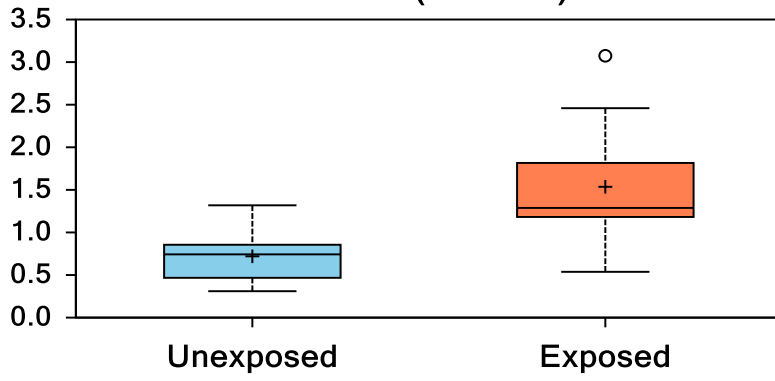

**omeprazole**

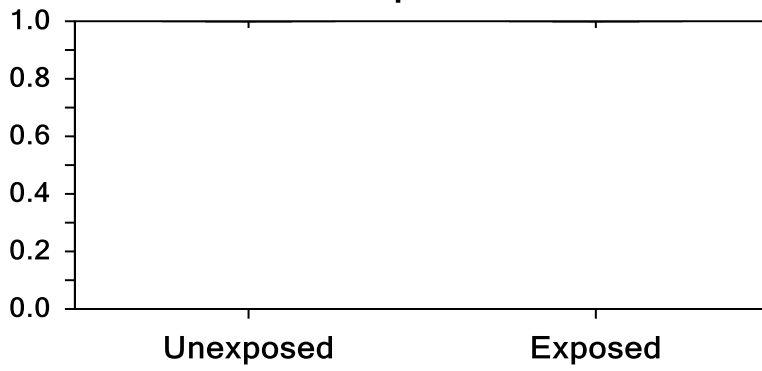

**p-acetamidophenylglucuronide**

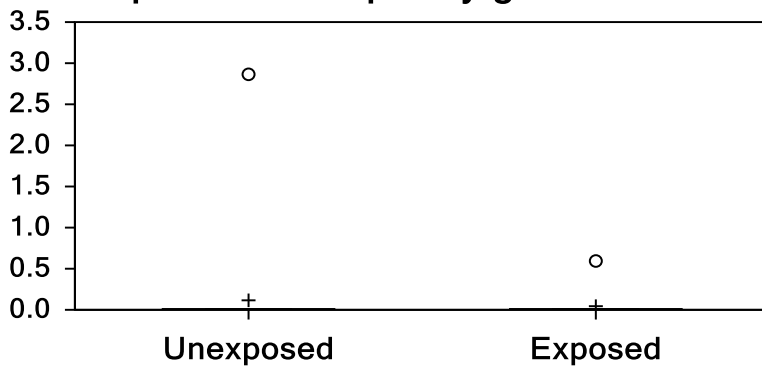



palmitoleate (16:1n7)

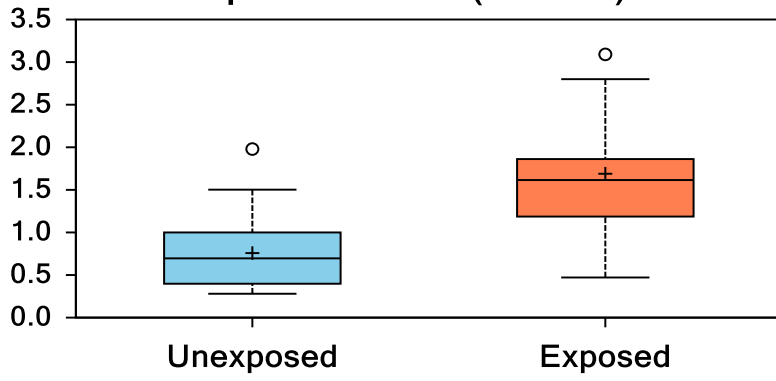

pantothenate

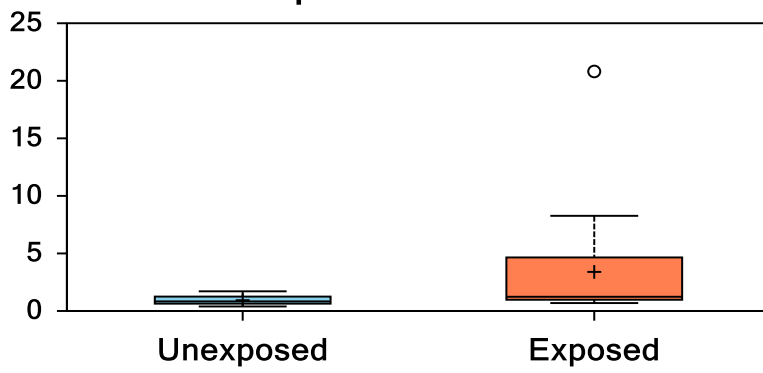

pelargonate (9:0)

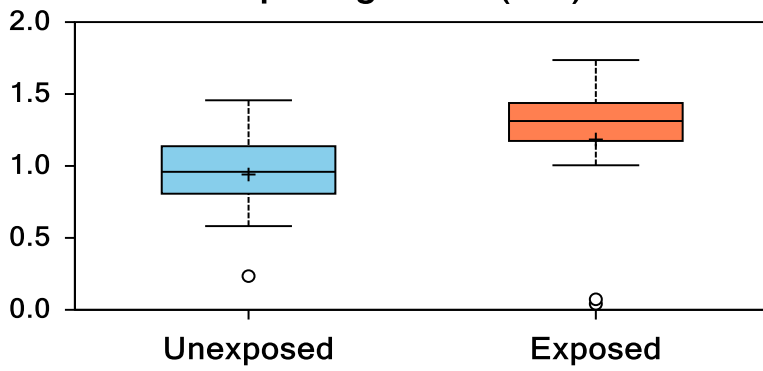

phenol sulfate

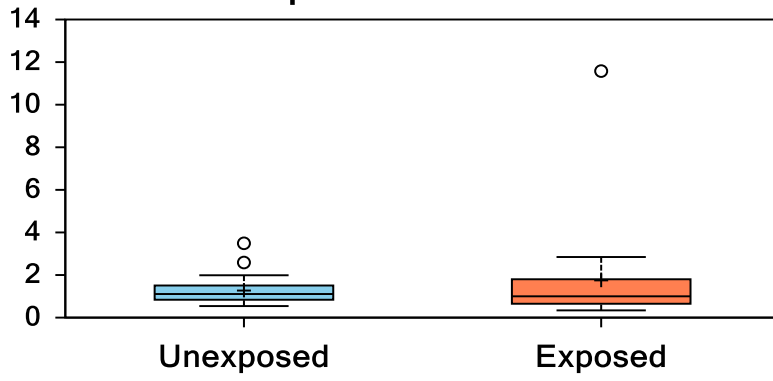

phenylacetylglutamine

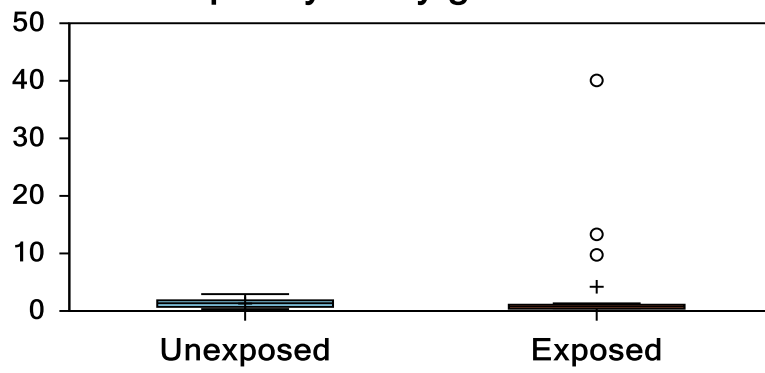

phenylalanylisoleucine

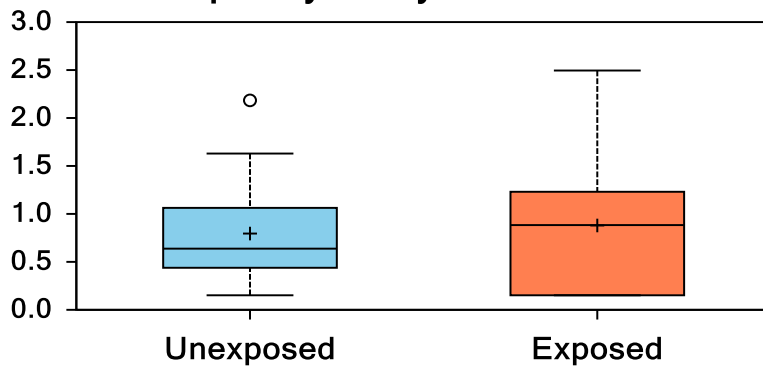

### phenylalanylserine

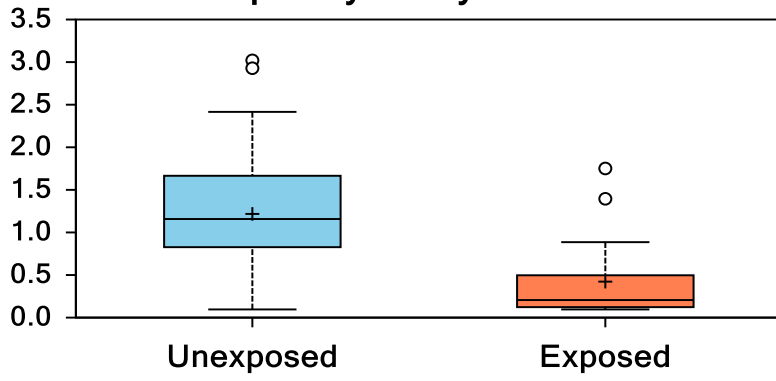

### phenylpyruvate

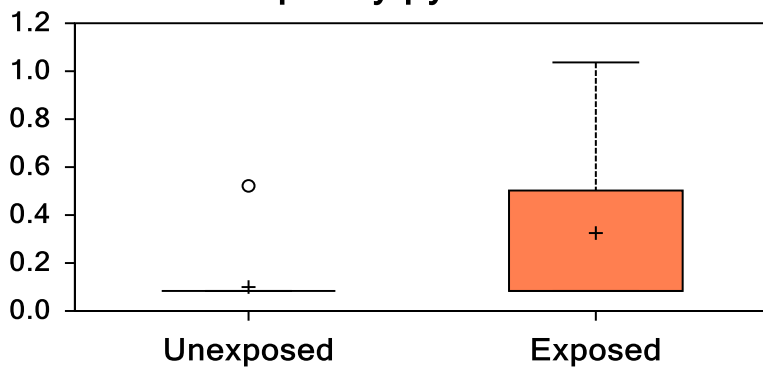

### phytosphingosine

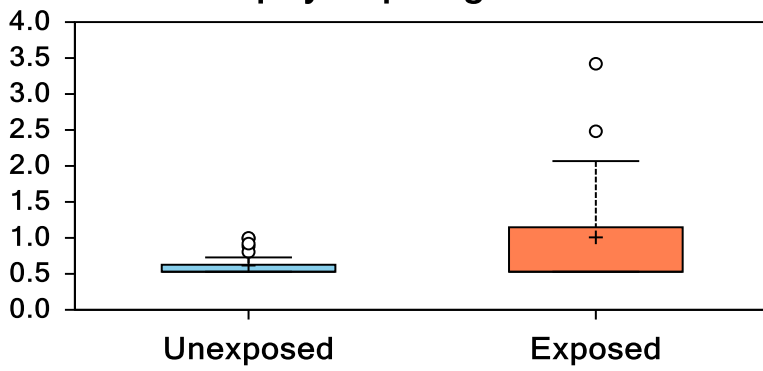

### pipерine

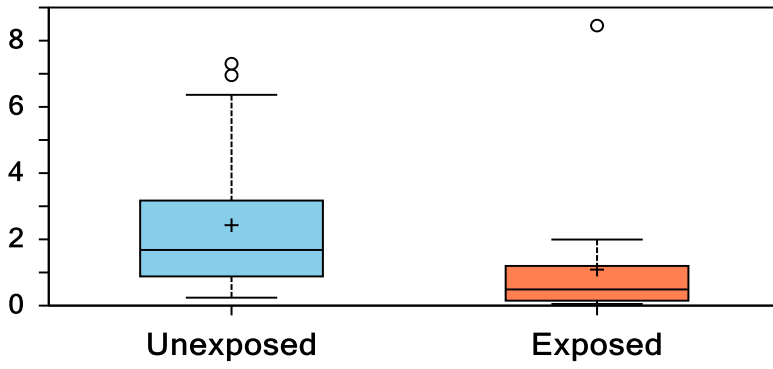

### pregnen-diol disulfate\*

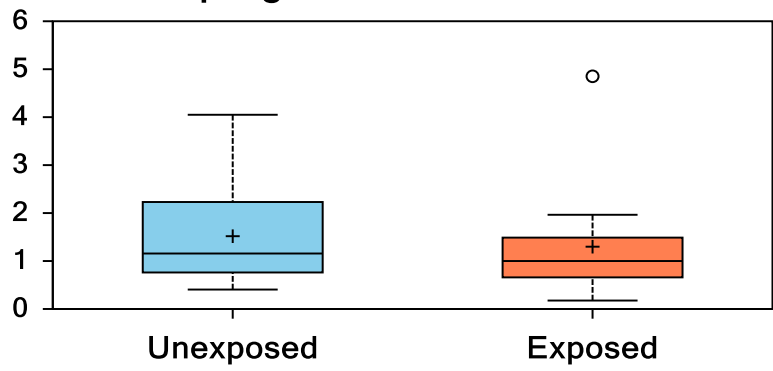

### proline

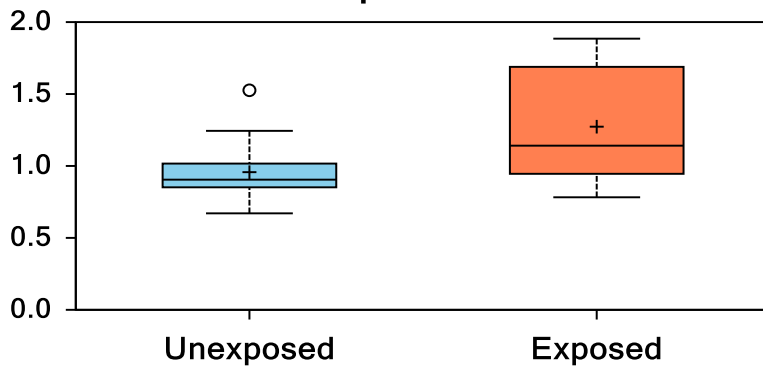

prolylproline

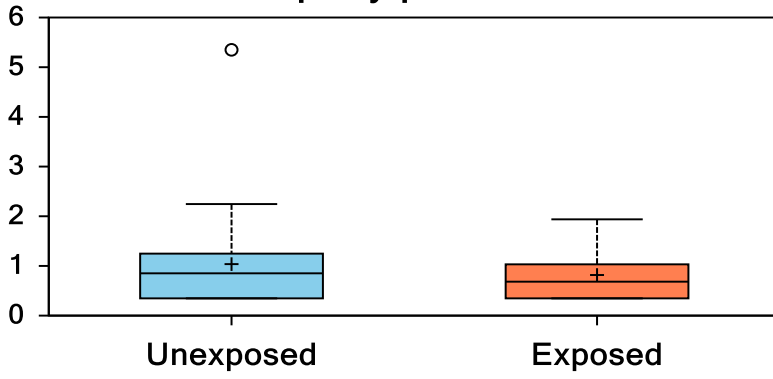

pyridoxate

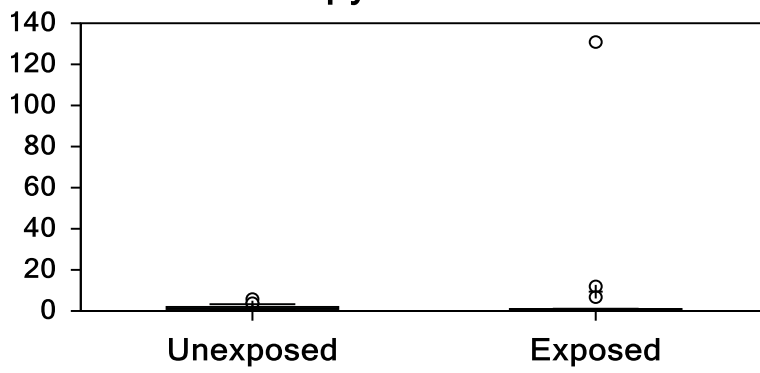

pyroglutamylglutamine

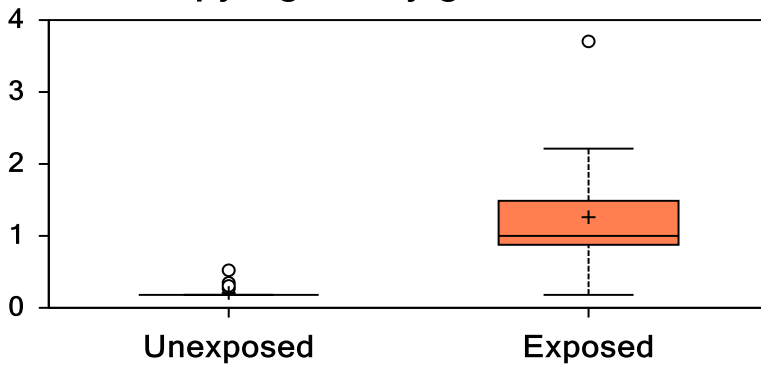

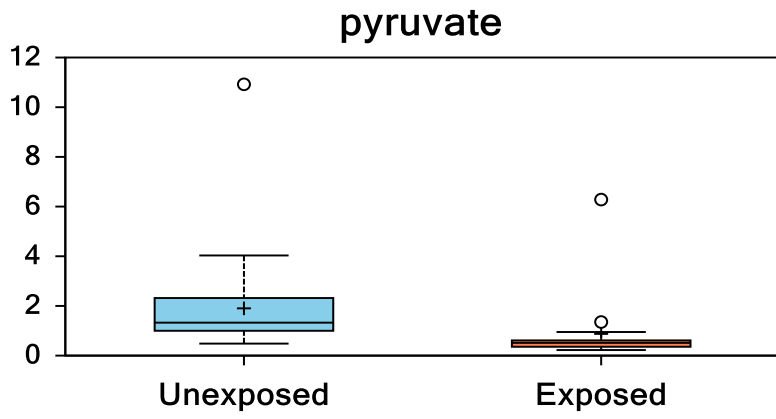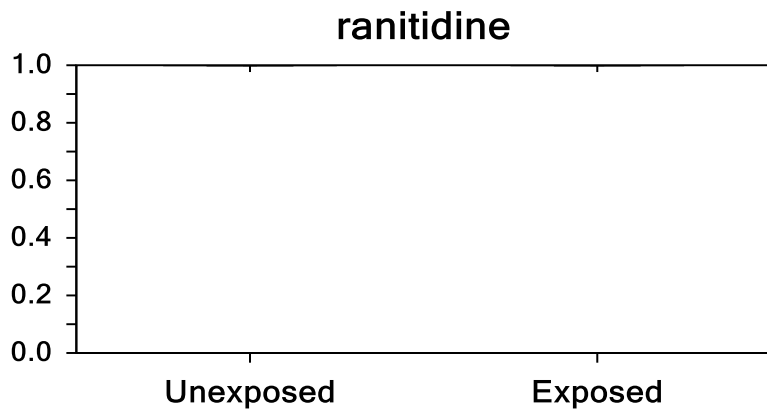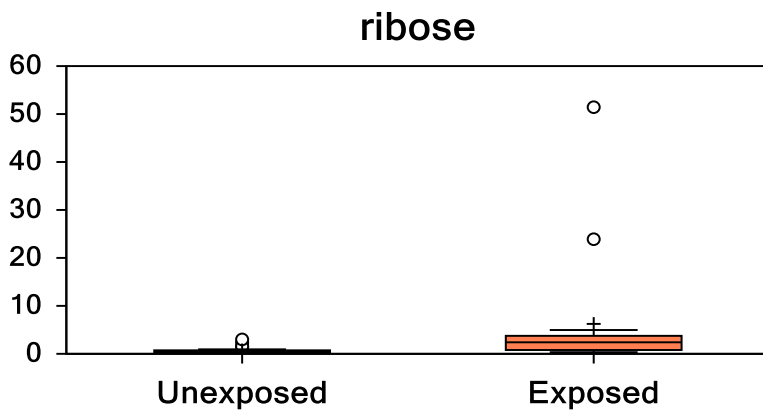

salicyluric glucuronide\*

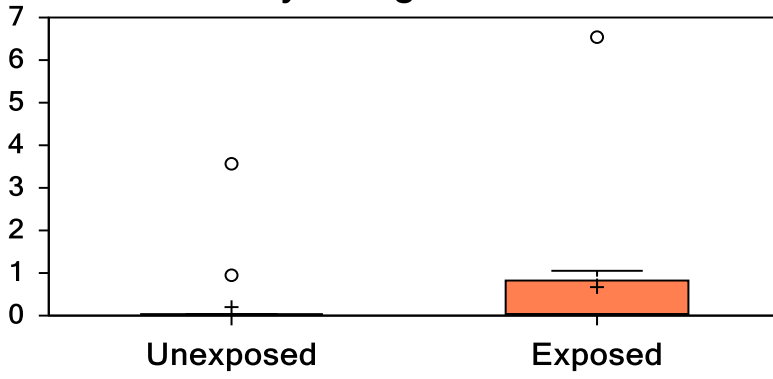

sebacate (decanedioate)

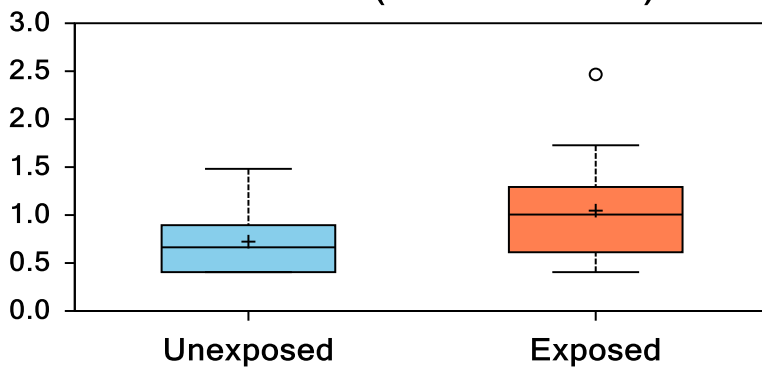

serylisoleucine\*

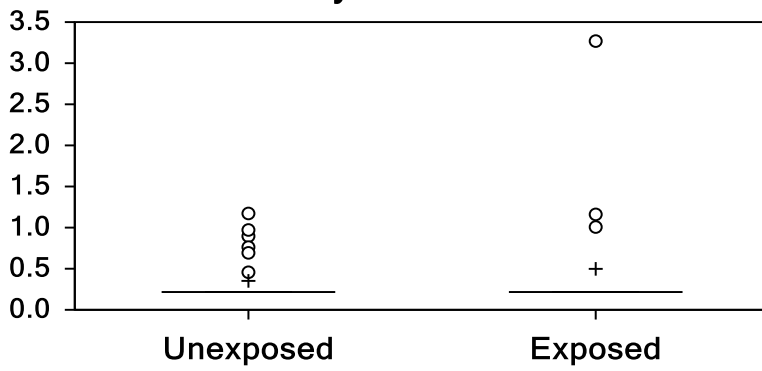

### S-methylcysteine

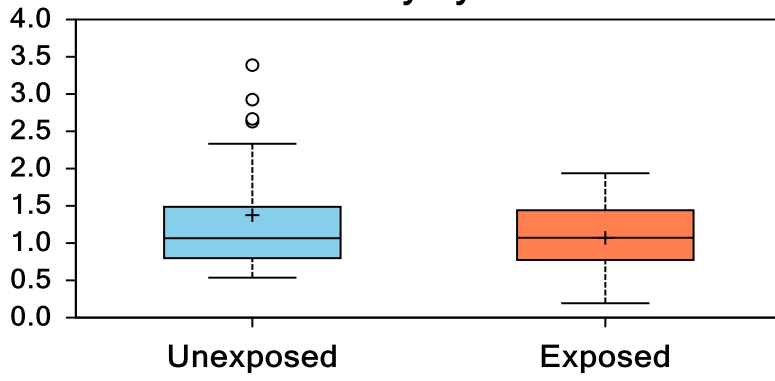

### sphingosine

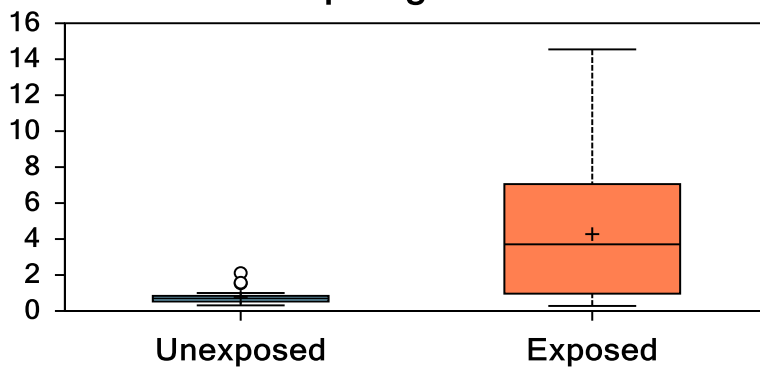

### stearamide

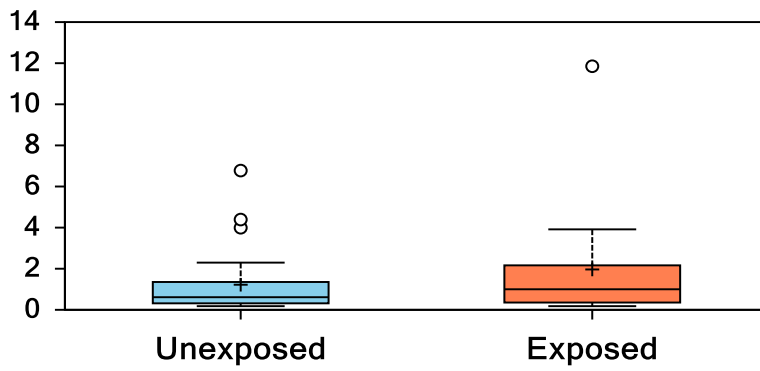



**stearoyl sphingomyelin**

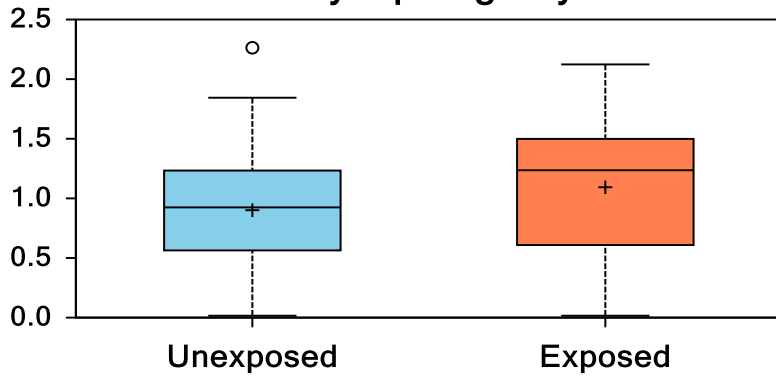

**succinate**

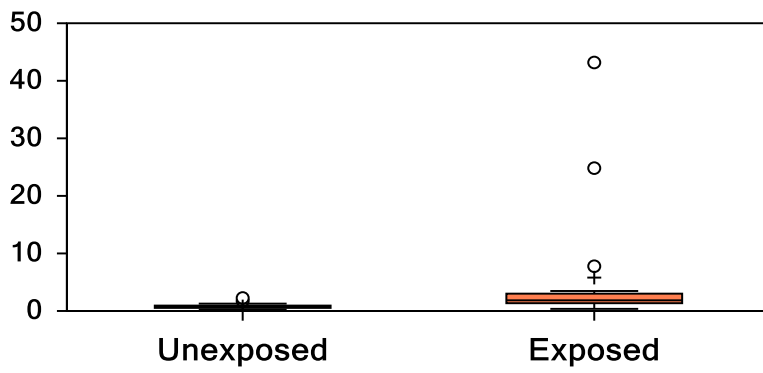

**taurochenodeoxycholate**

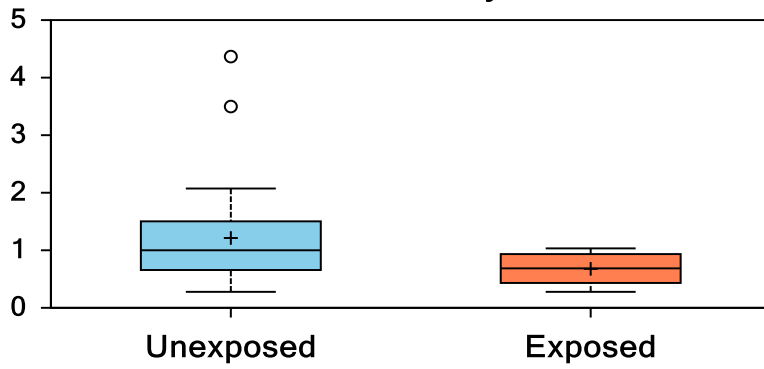

### taurodeoxycholate

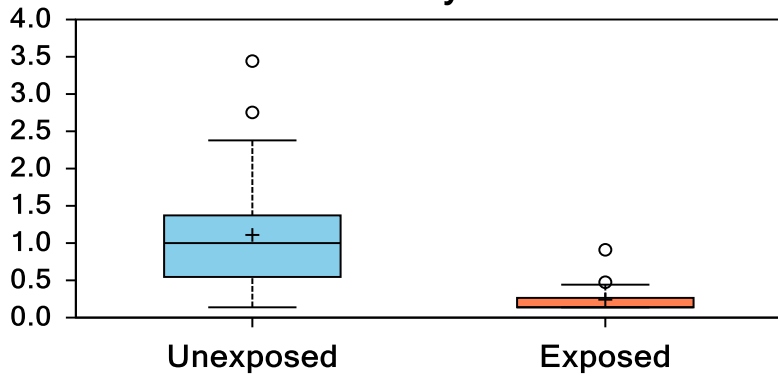

### Tetracycline\*

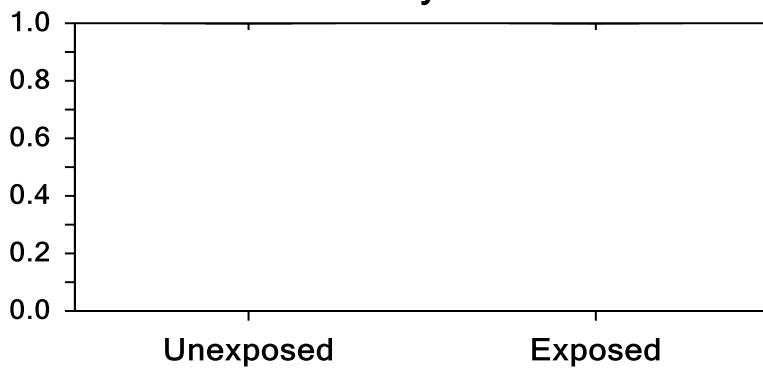

### threitol

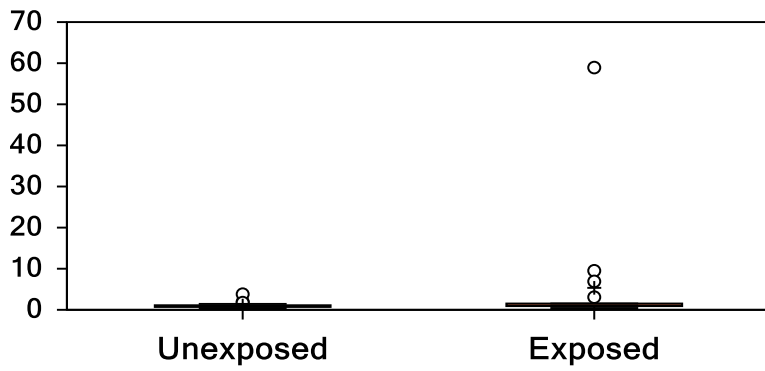

### threonylleucine

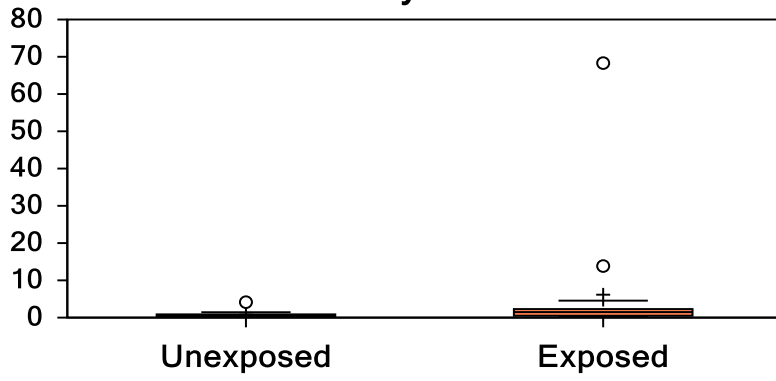

### thymine

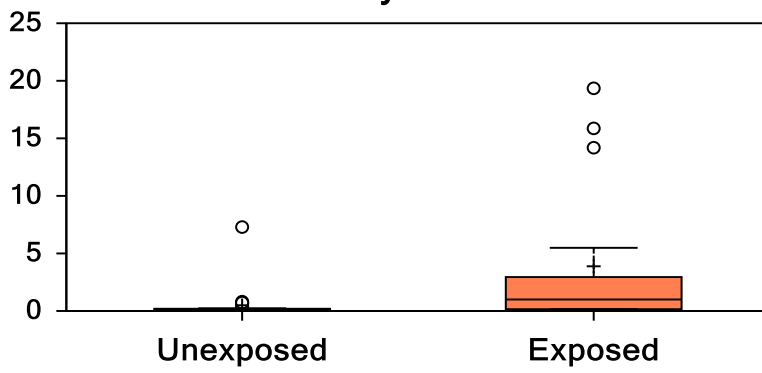

### tiglyl carnitine

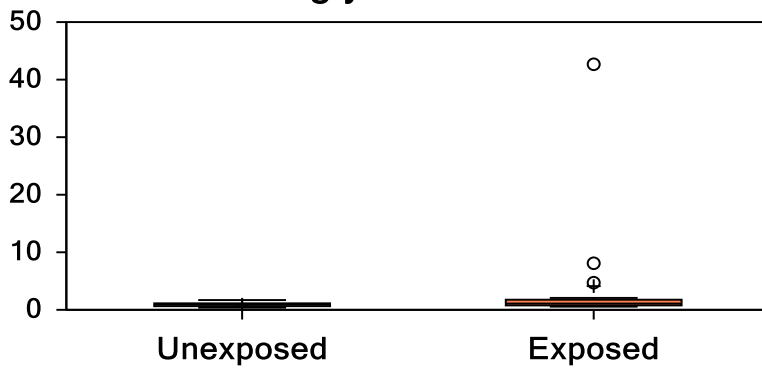

triethanolamine

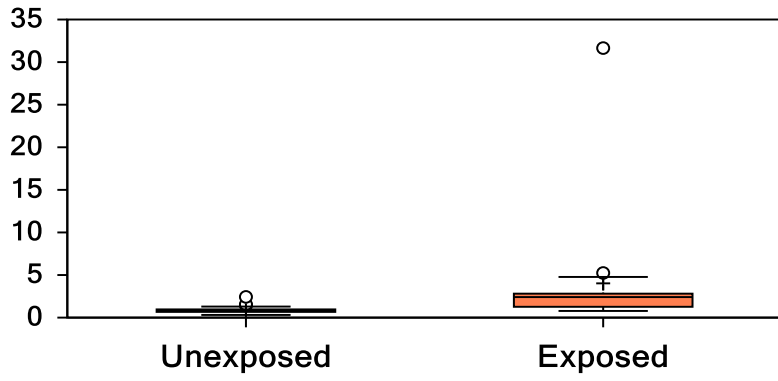

tryptophan betaine

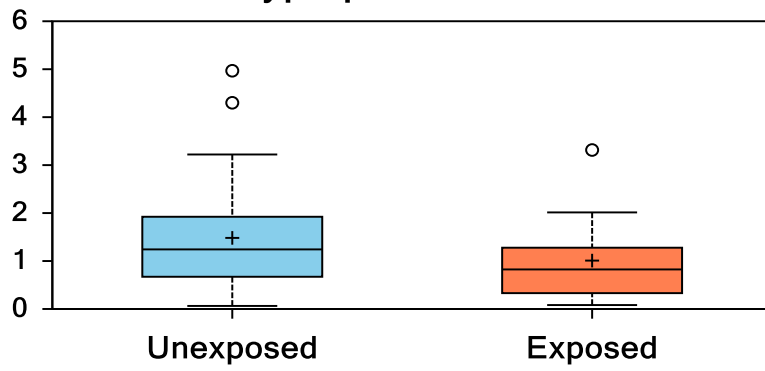

tyramine

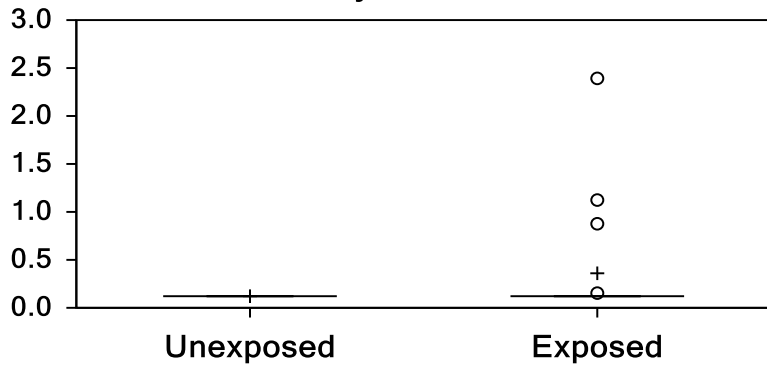

tyrosylleucine

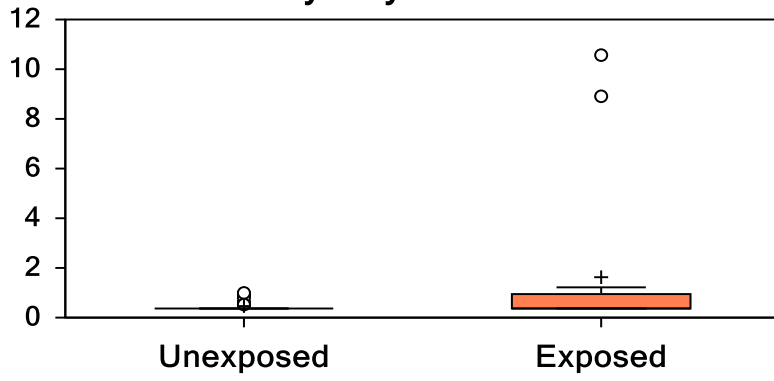

uracil

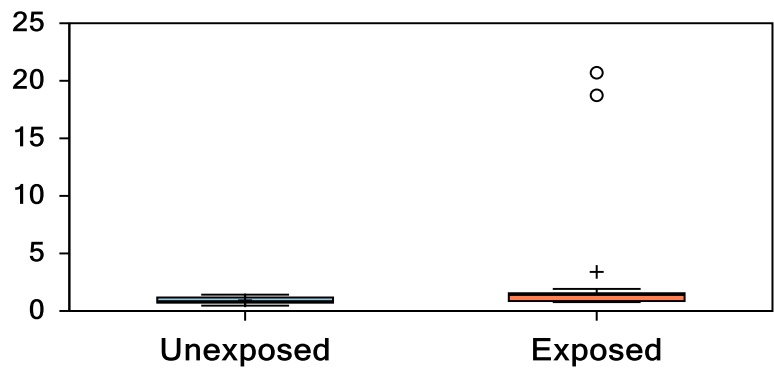

uridine

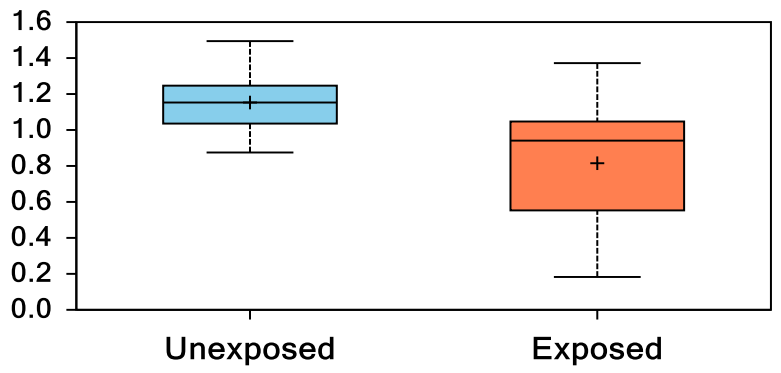

valylaspartate

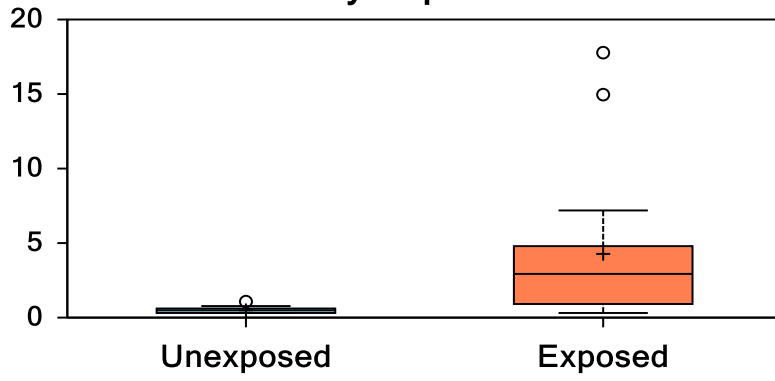

valylhistidine

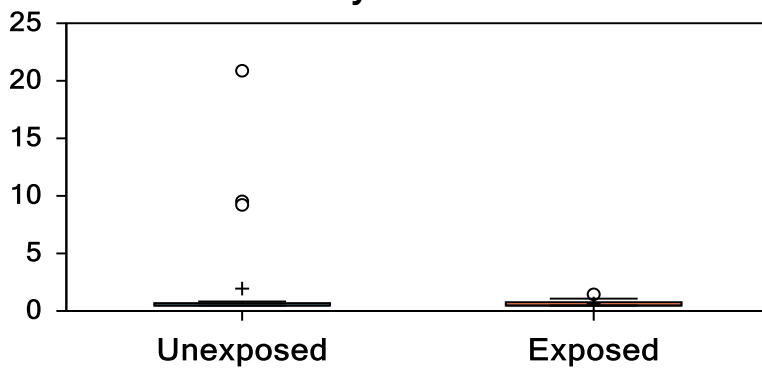

valylphenylalanine

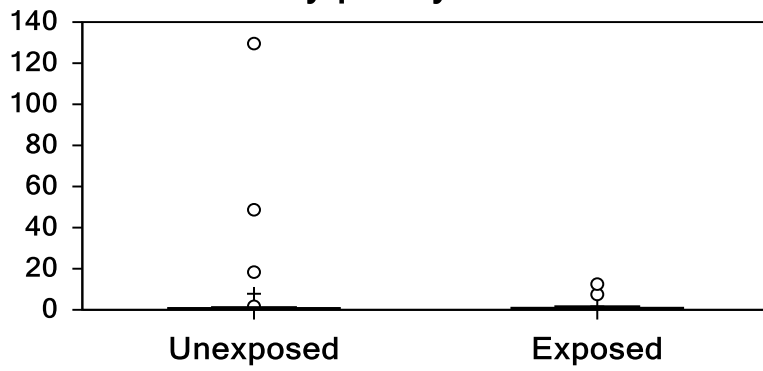

valylvaline

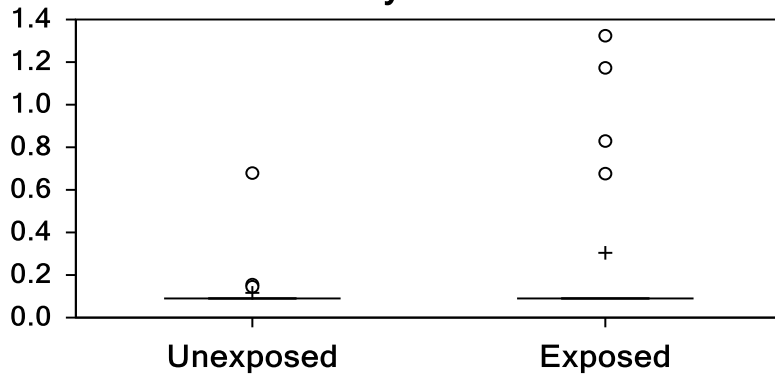

vanillylmandelate (VMA)

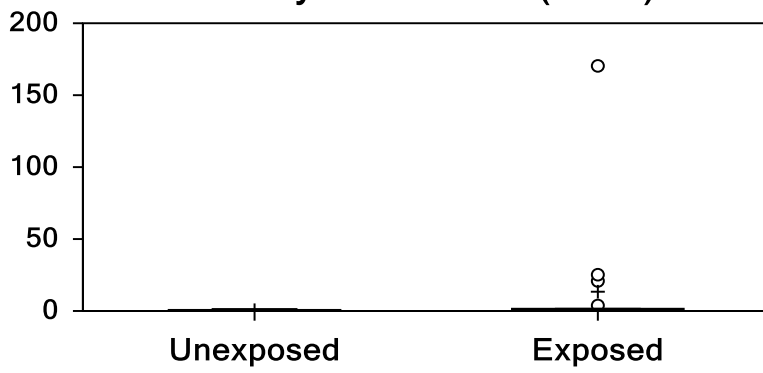

X - 02249

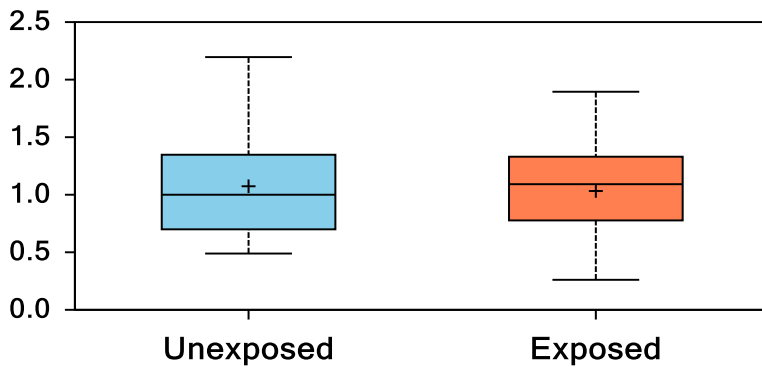

X - 06126

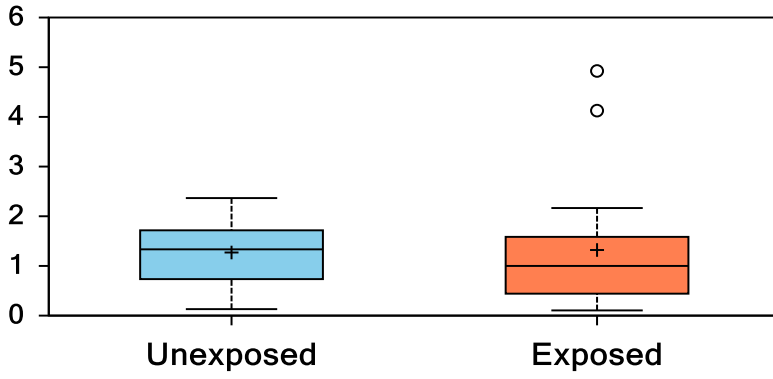

X - 09789

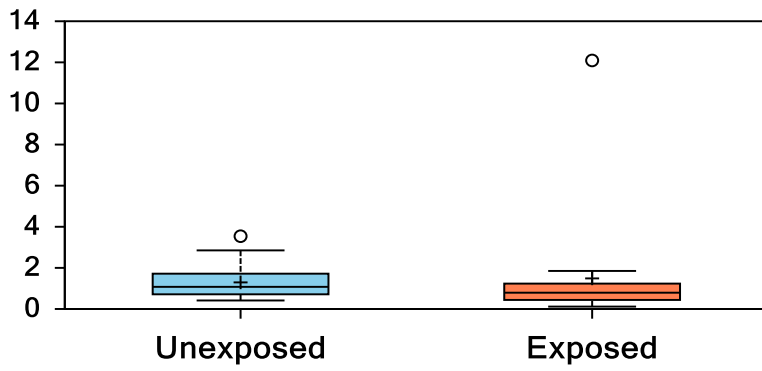

X - 11261

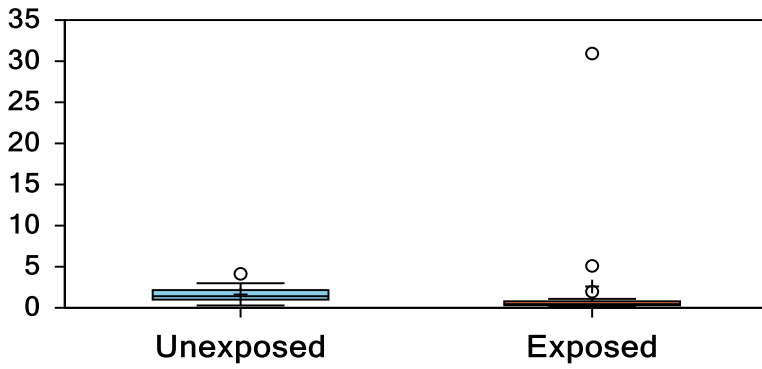



X - 11308

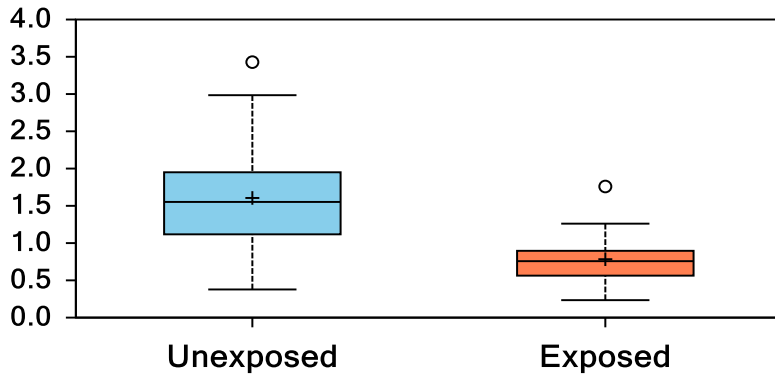

X - 11333

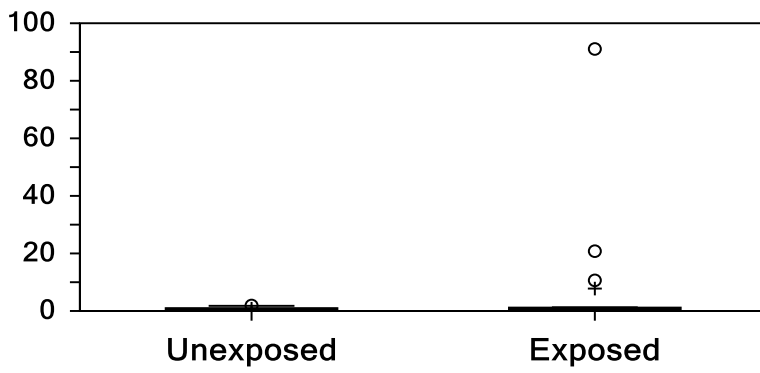

X - 11360

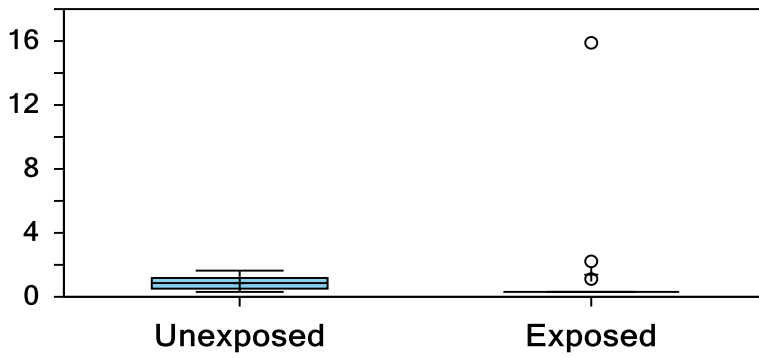

X - 11381

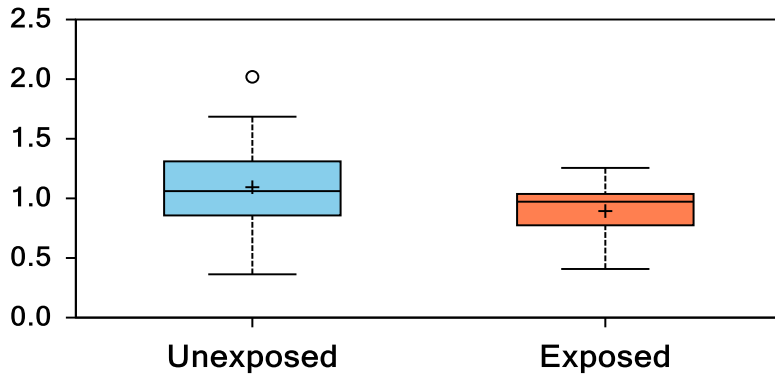

X - 11412

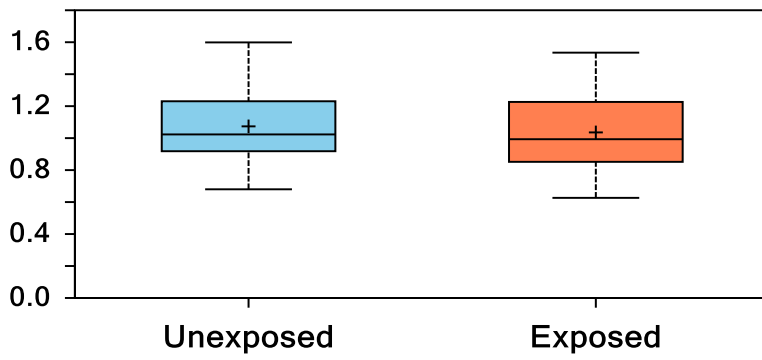

X - 11437

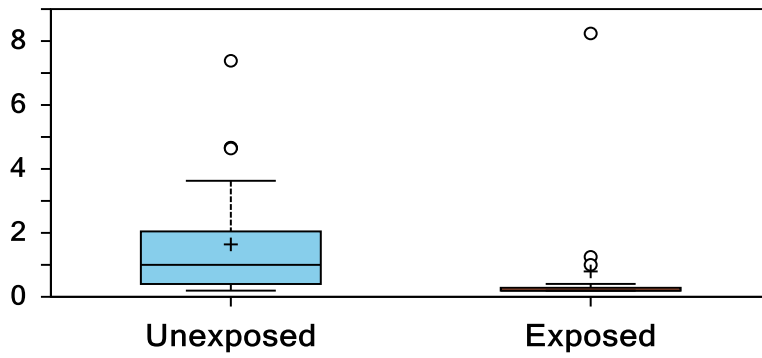

X - 11441

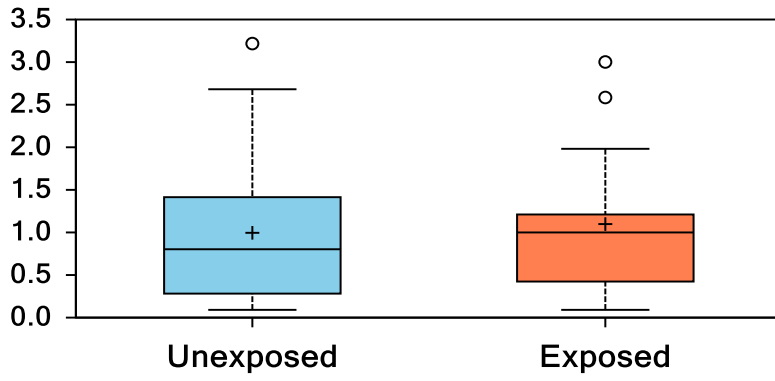

X - 11452

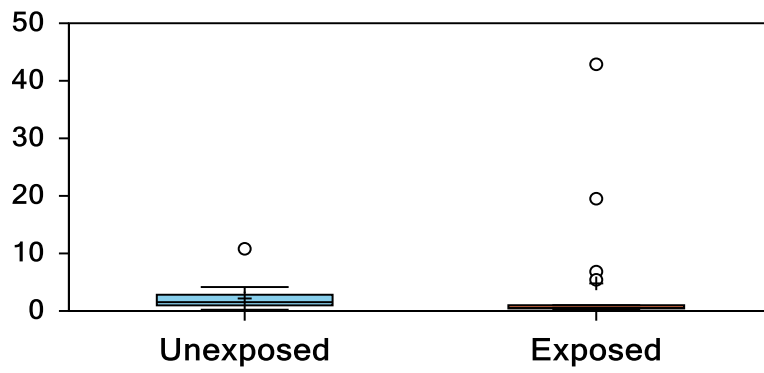

X - 11476

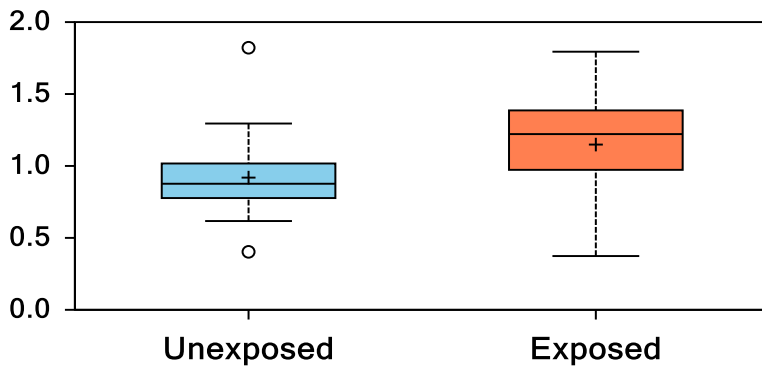

X - 11485

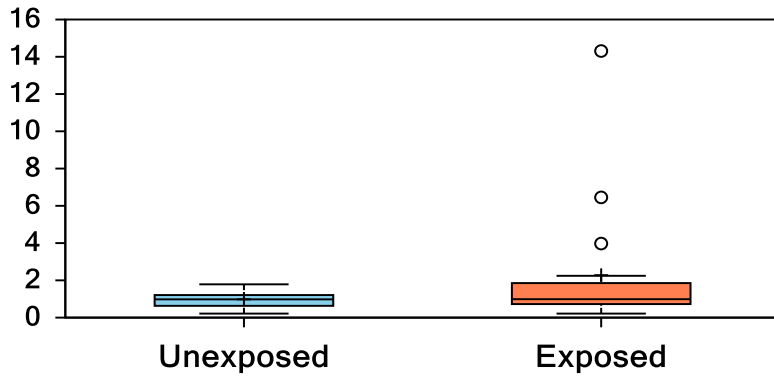

X - 11521

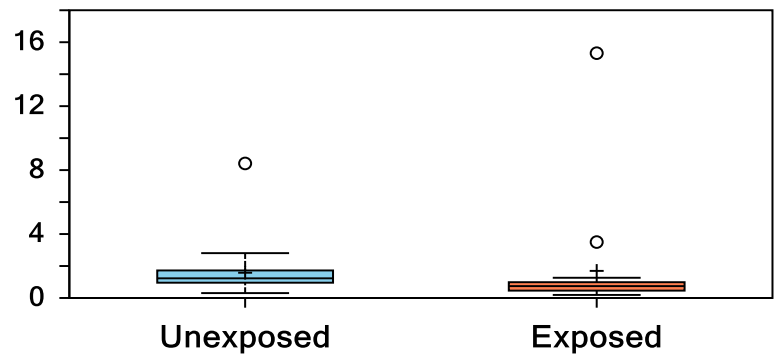

X - 11530

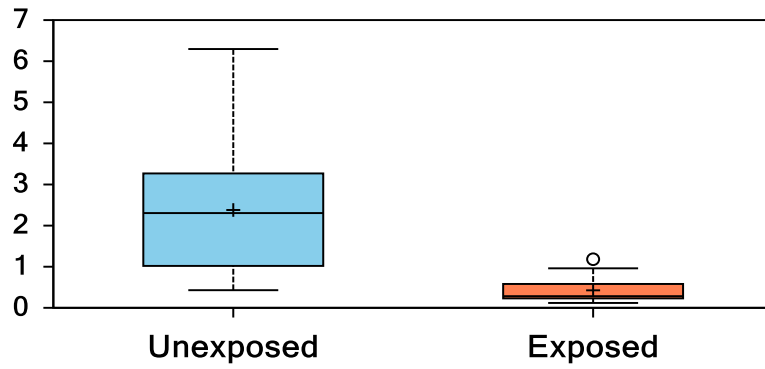

X - 11538

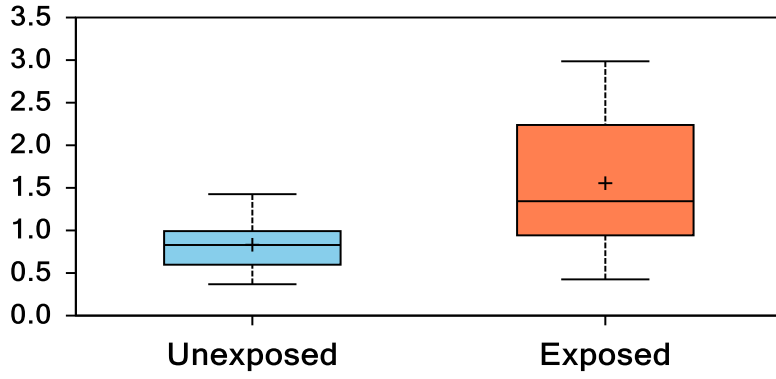

X - 11542

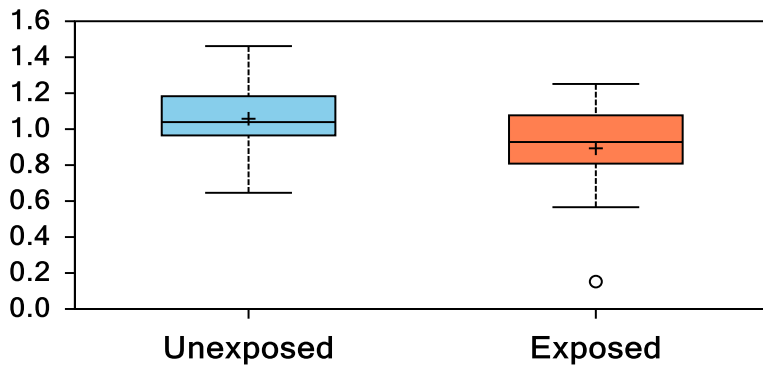

X - 11561

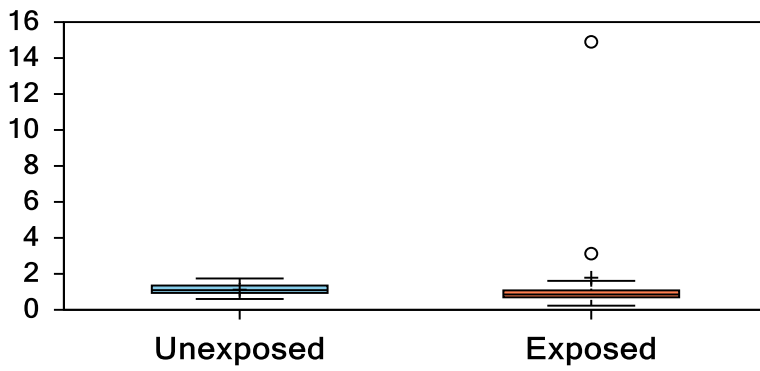

X - 11662

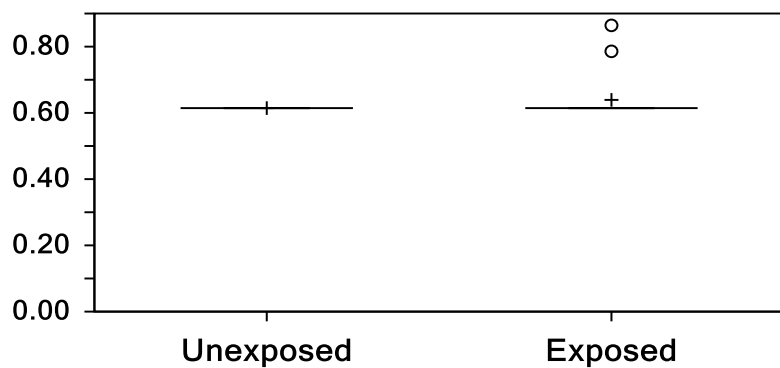

X - 11736

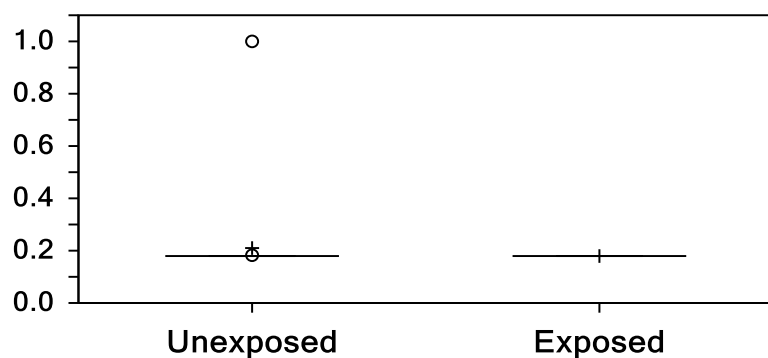

X - 11795

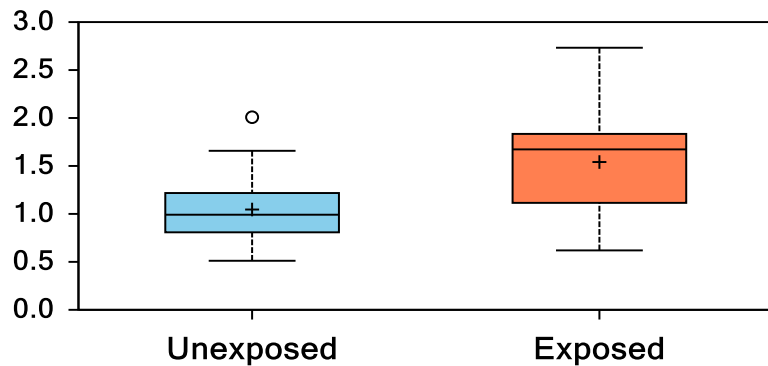

X - 11814

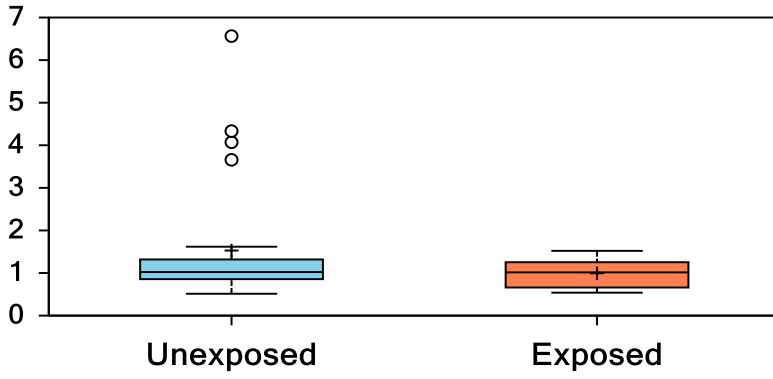

X - 11835

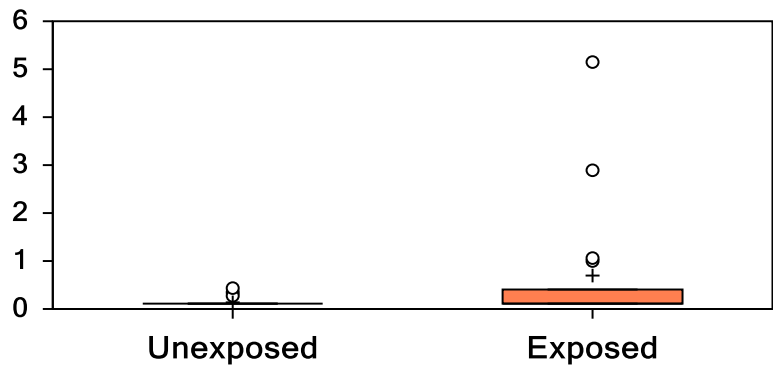

X - 11843

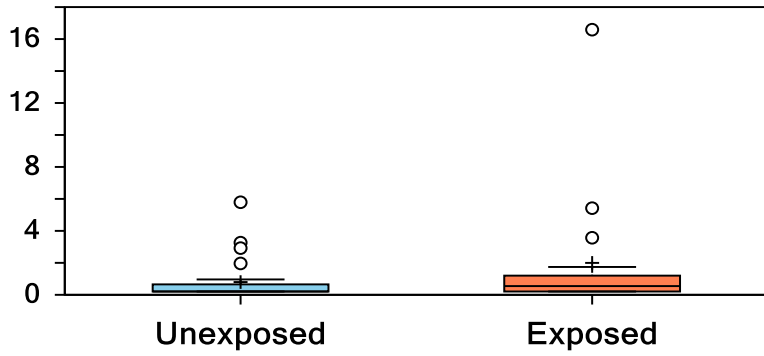

X - 11849

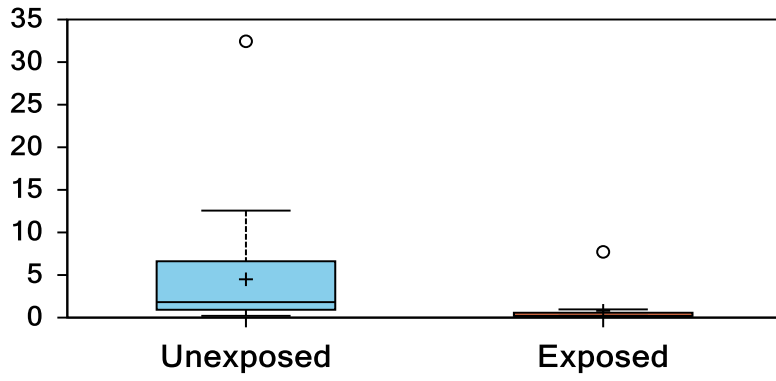

X - 11858

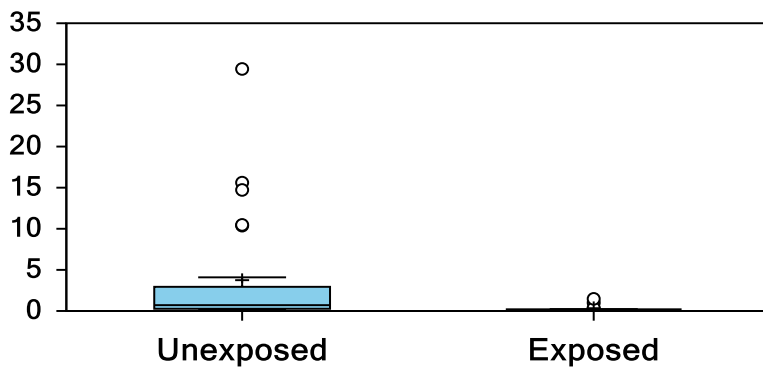

X - 11875

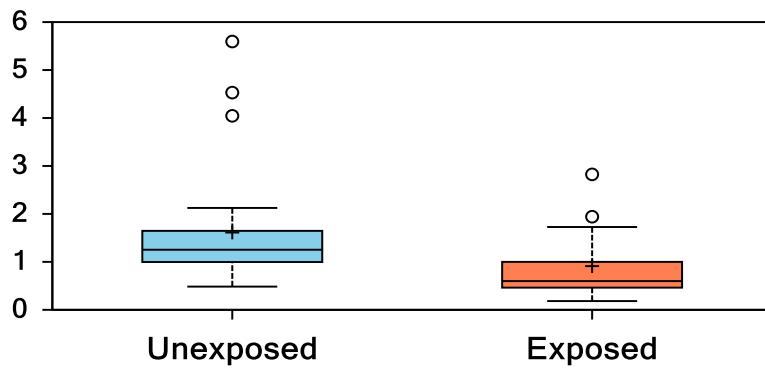



X - 11945

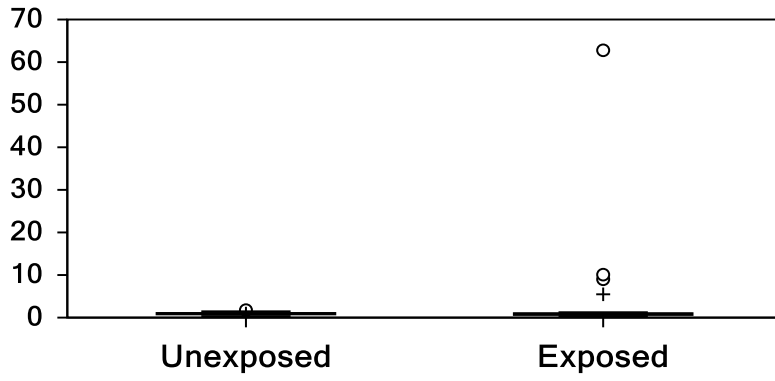

X - 12029

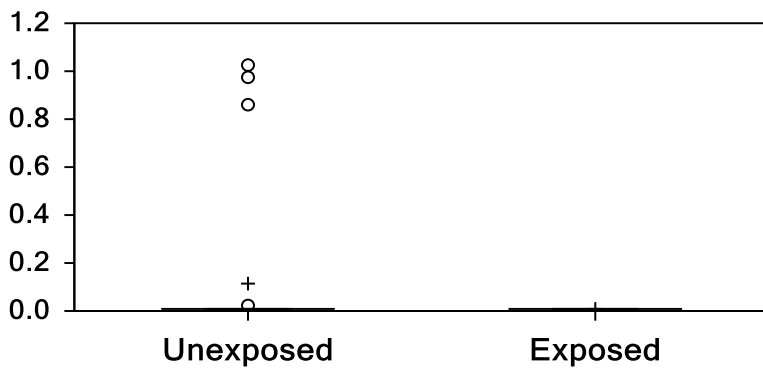

X - 12040

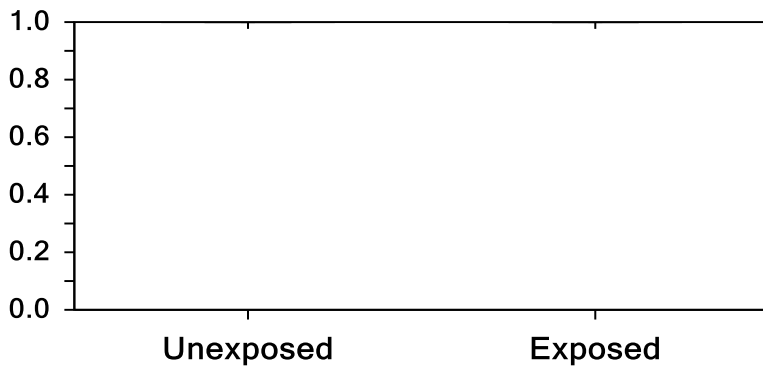

X - 12063

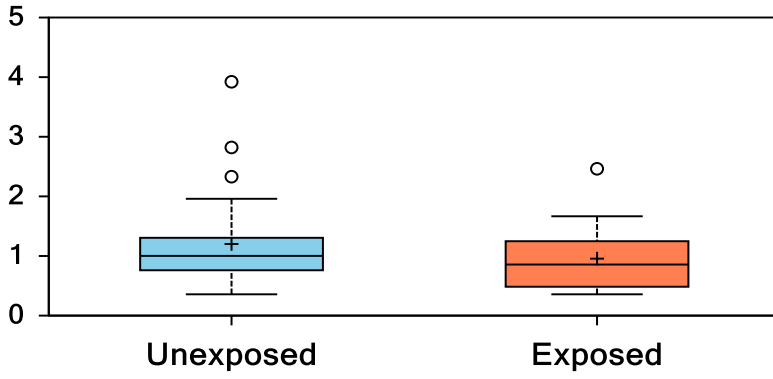

X - 12095

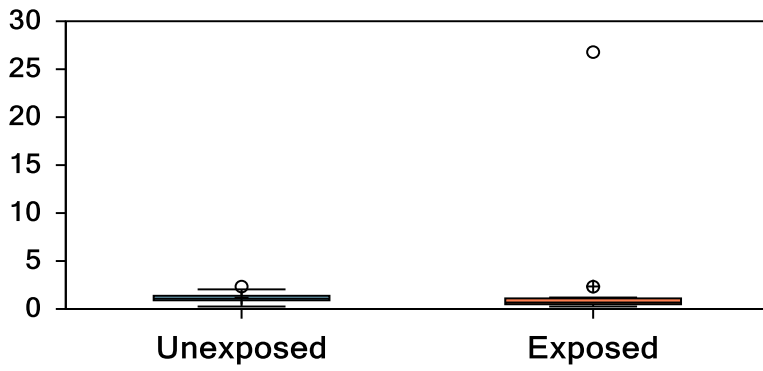

X - 12100

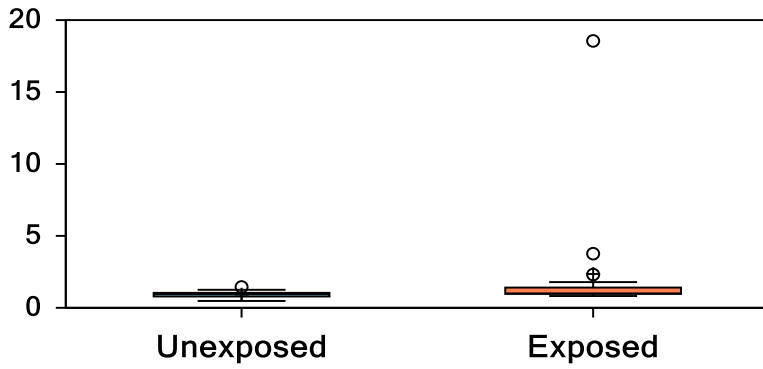

X - 12107

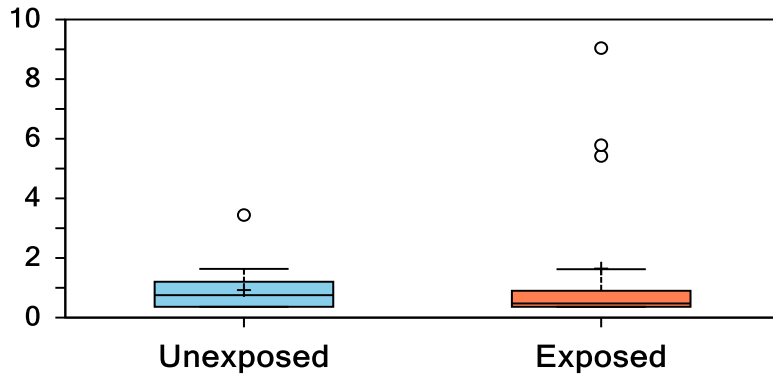

X - 12116

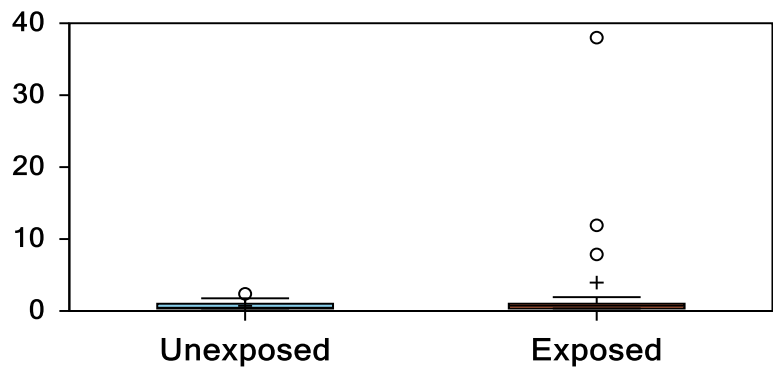

X - 12122

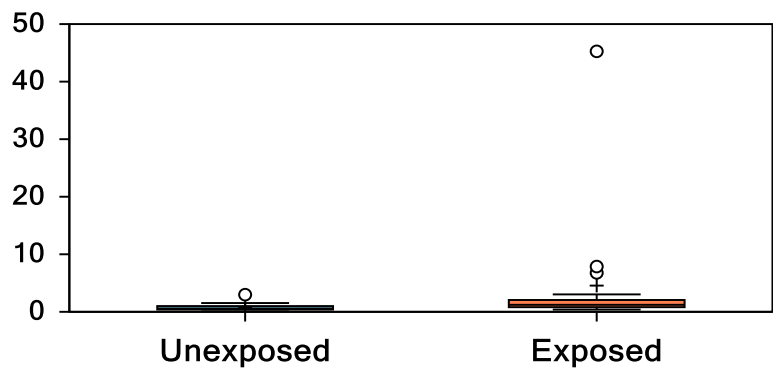

X - 12128

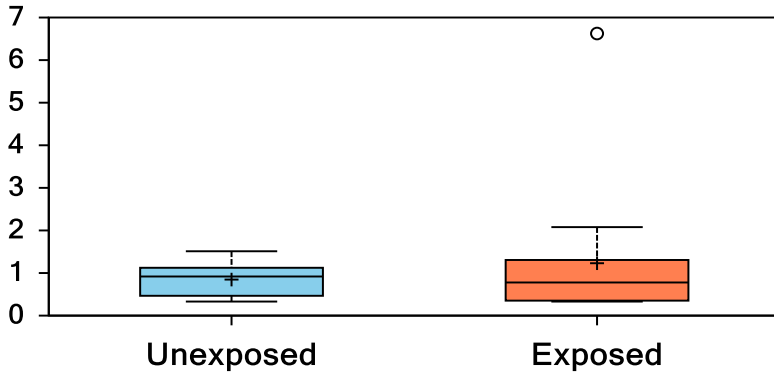

X - 12170

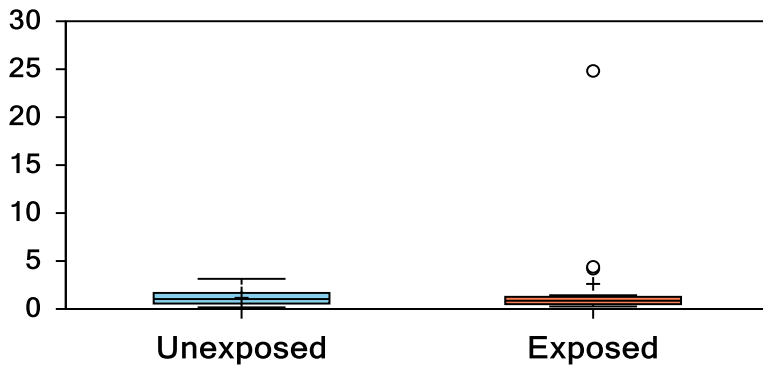

X - 12193

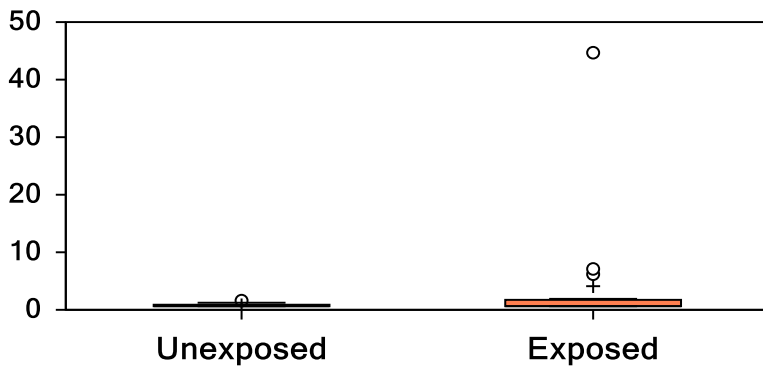

X - 12211

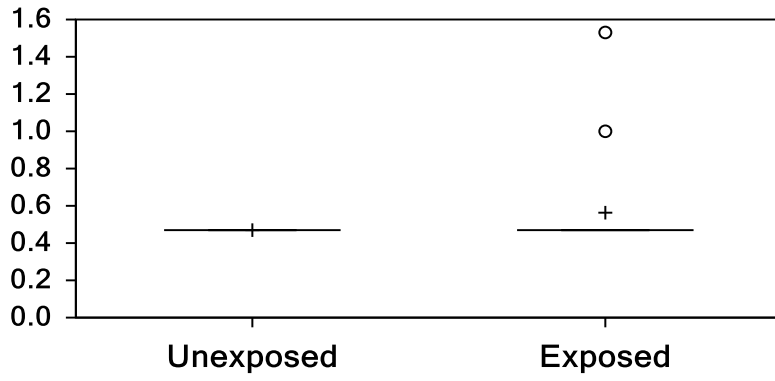

X - 12230

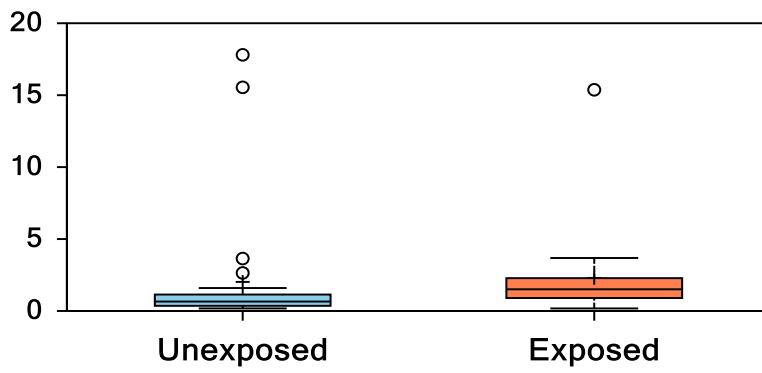

X - 12236

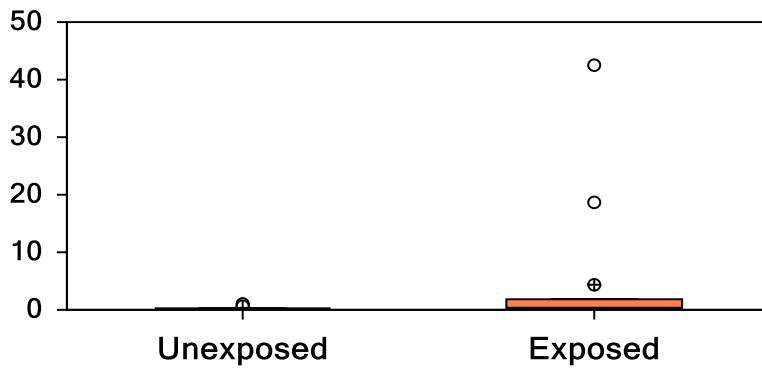

X - 12261

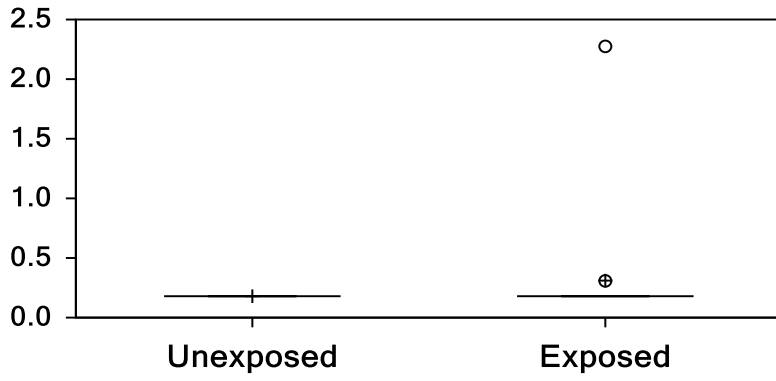

X - 12329

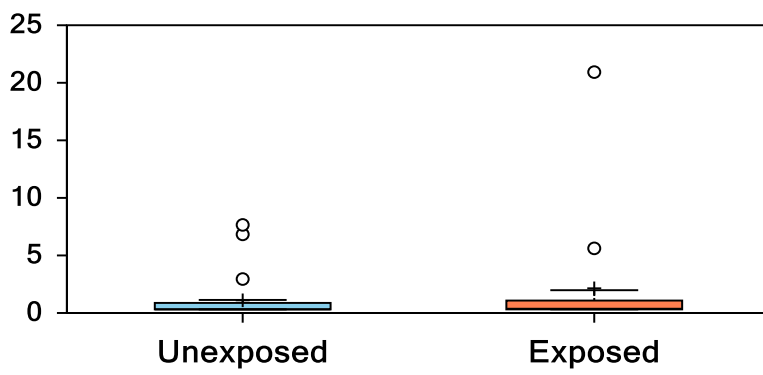

X - 12339

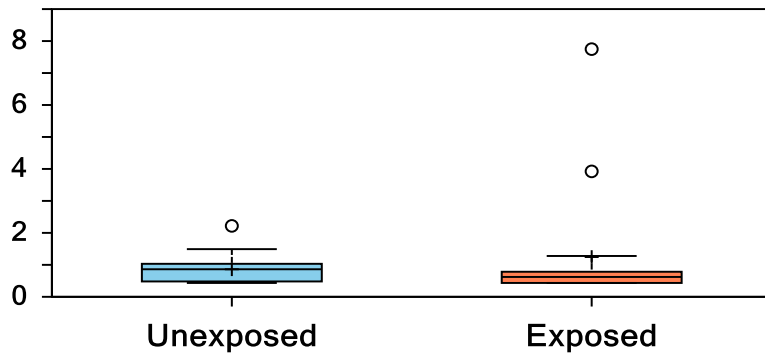

X - 12410

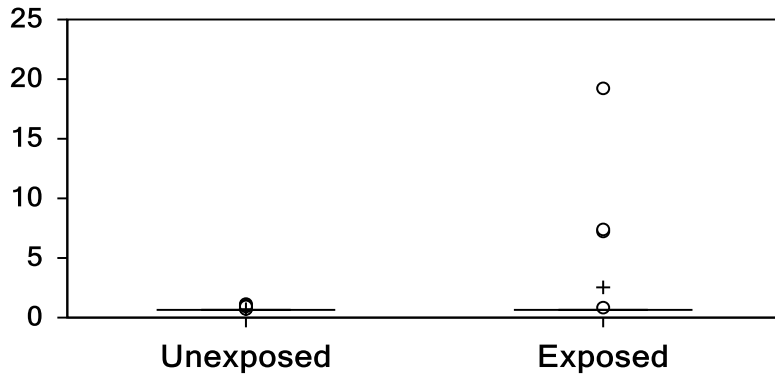

X - 12443

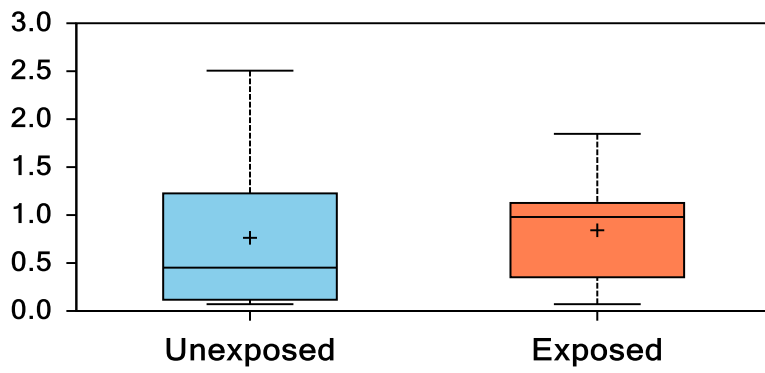

X - 12510

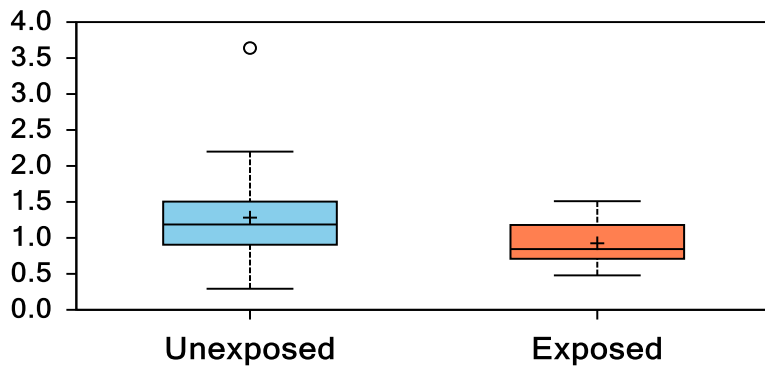

X - 12543

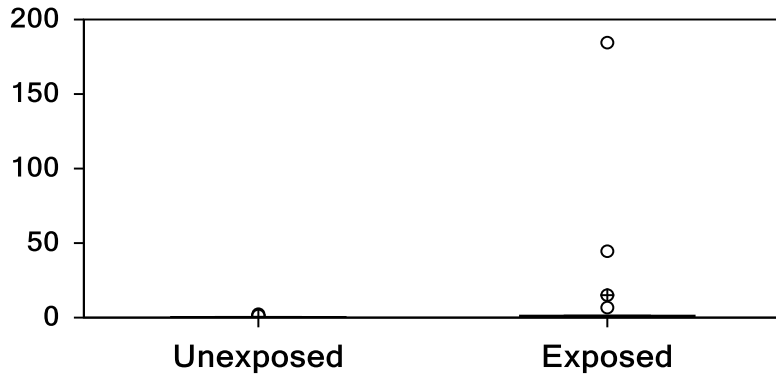

X - 12609

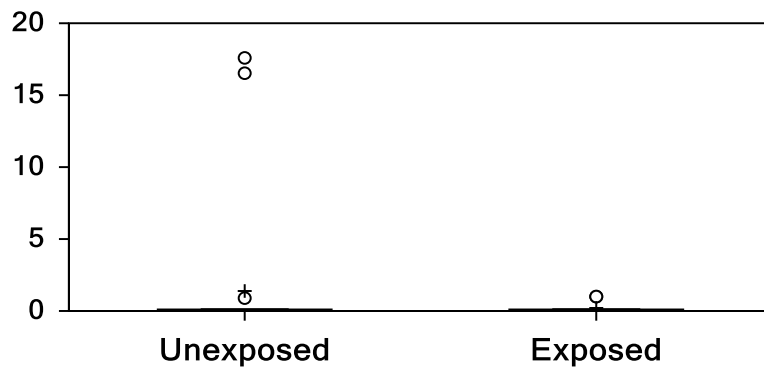

X - 12644

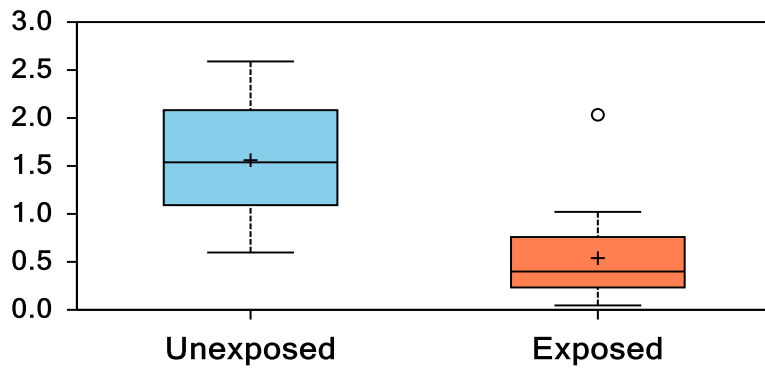



X - 12686

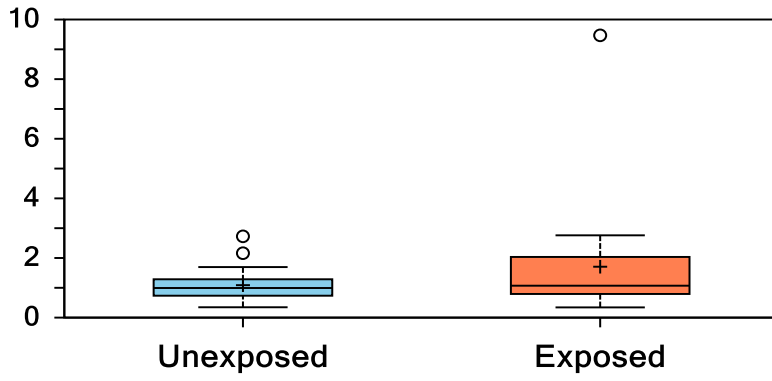

X - 12704

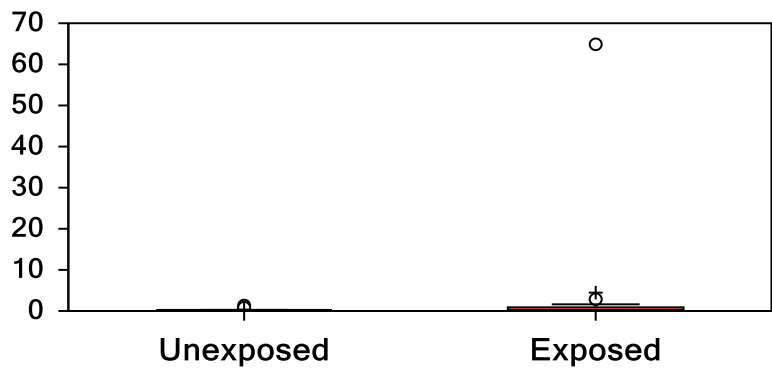

X - 12715

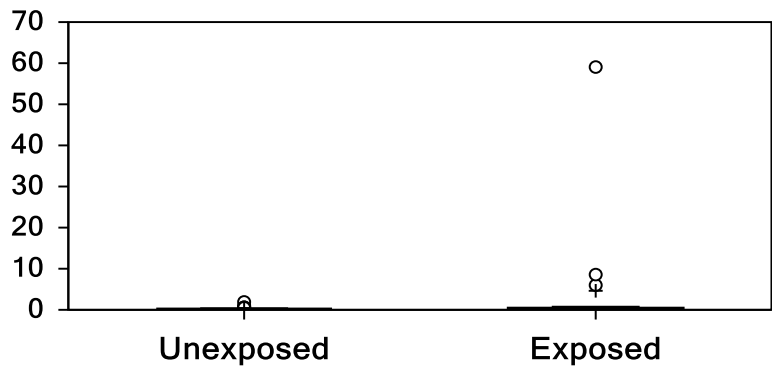

X - 12734

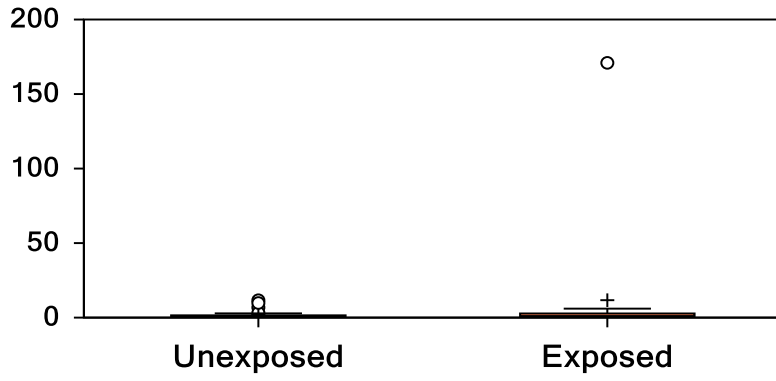

X - 12740

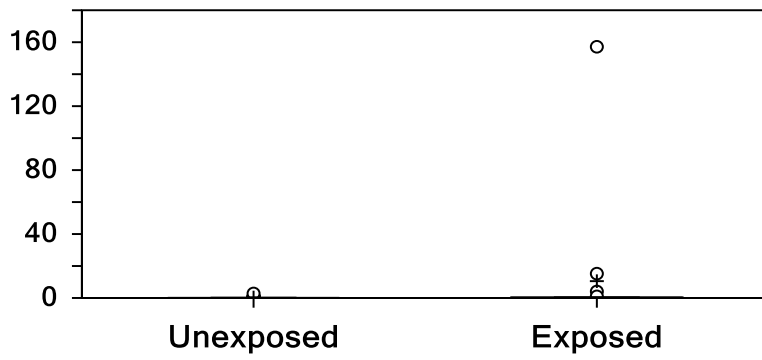

X - 12746

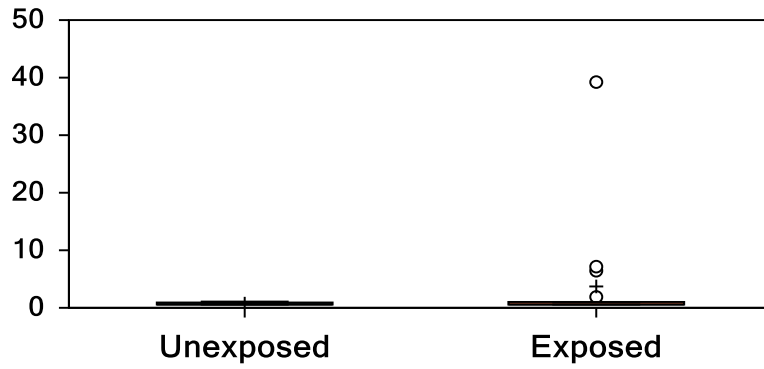

X - 12760

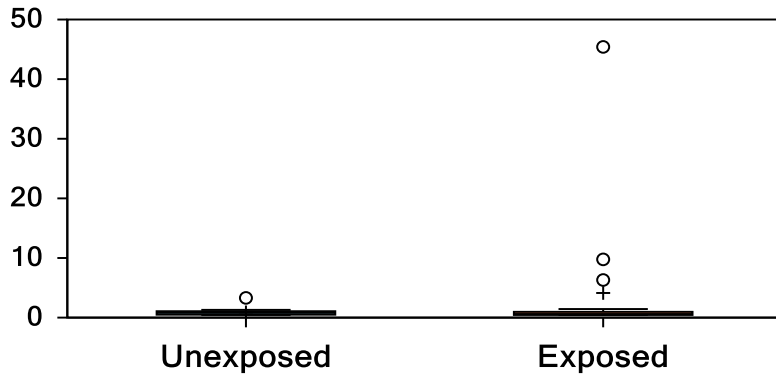

X - 12780

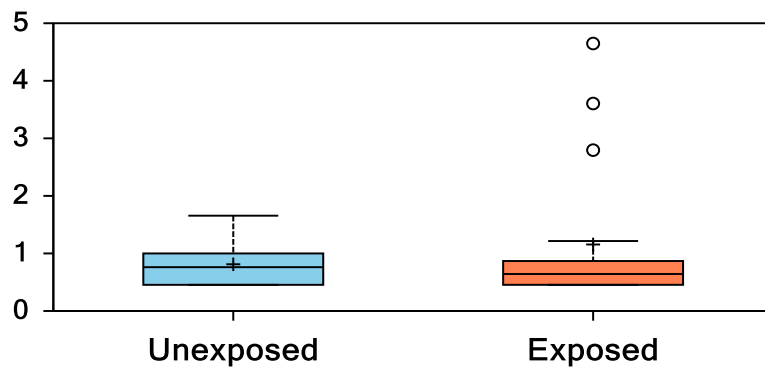

X - 12812

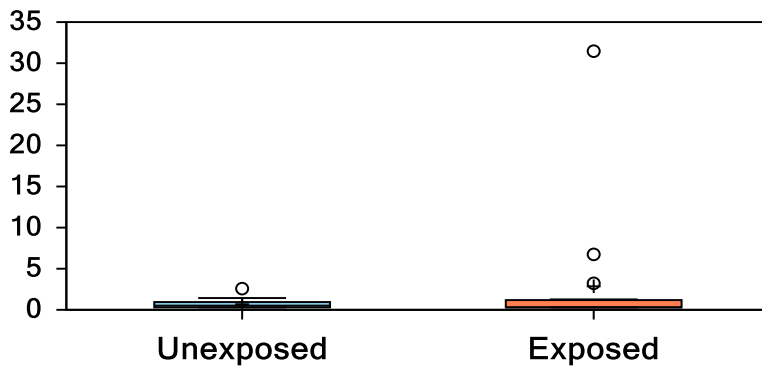

X - 12819

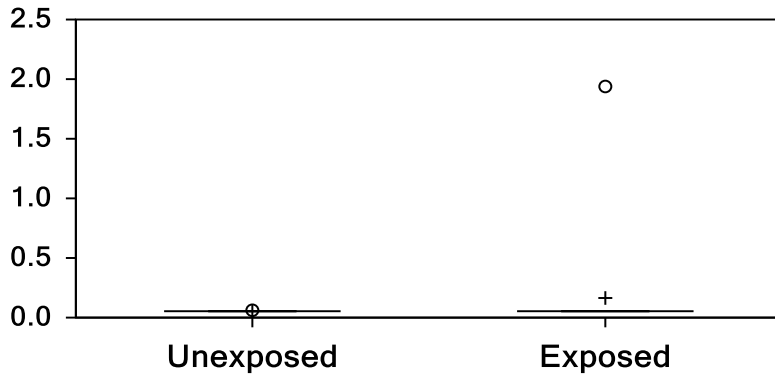

X - 12828

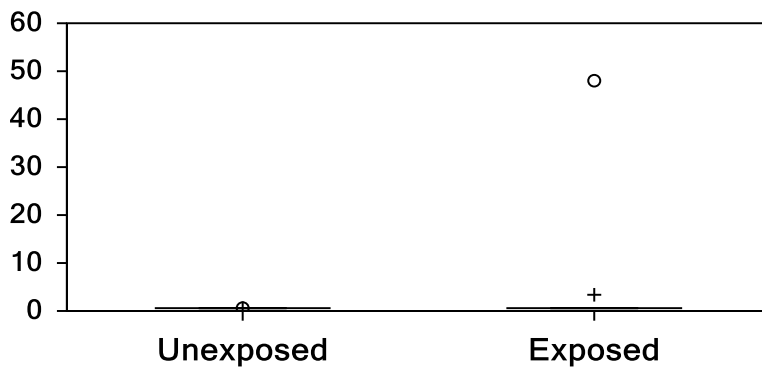

X - 12832

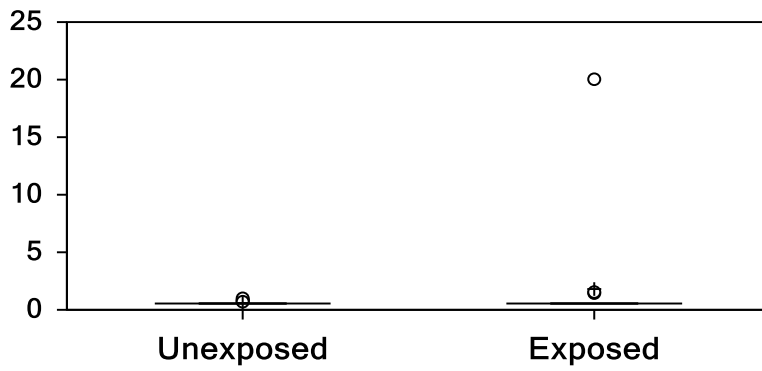

X - 12846

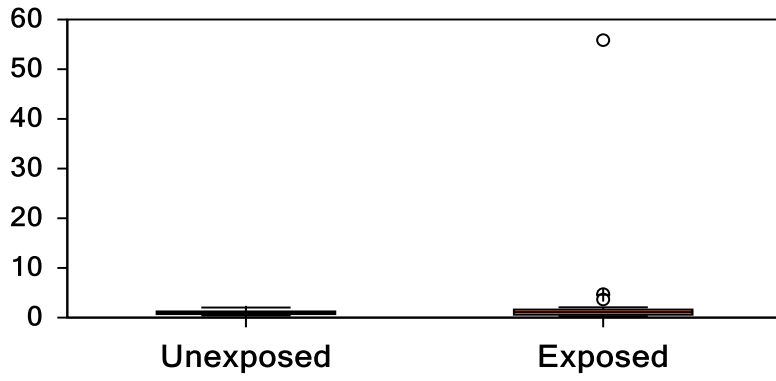

X - 12850

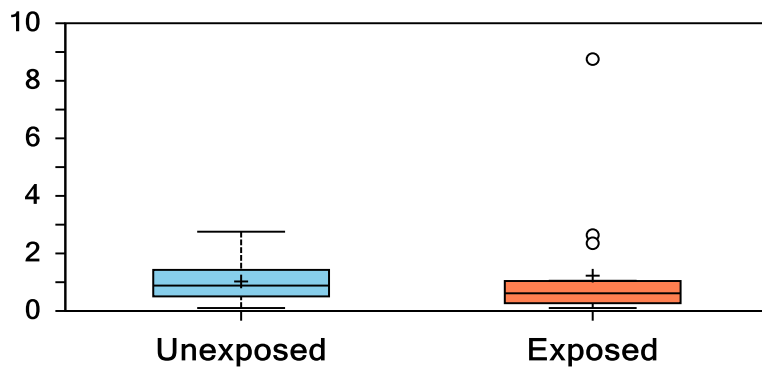

X - 12874

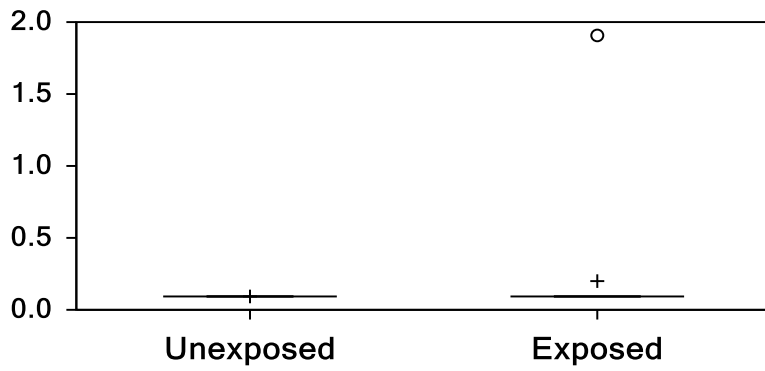

X - 12909

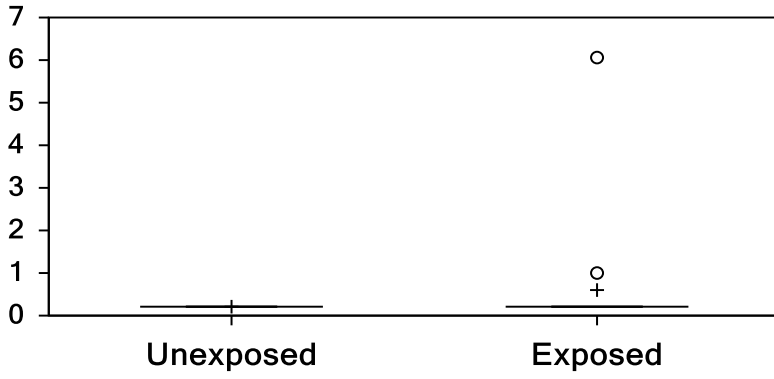

X - 13152

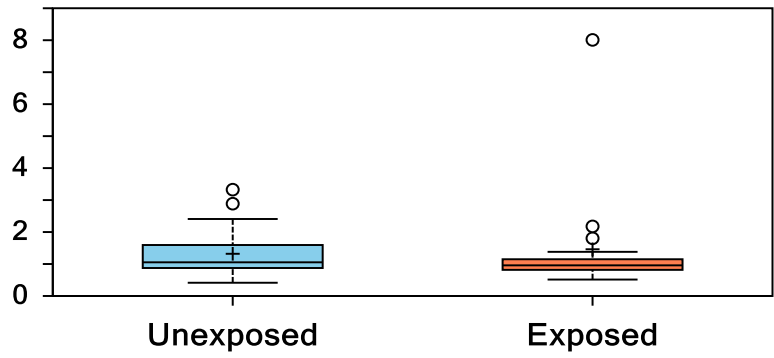

X - 13371

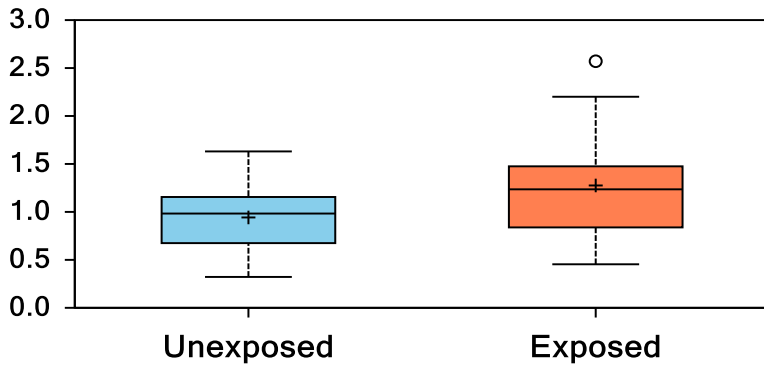

X - 13431

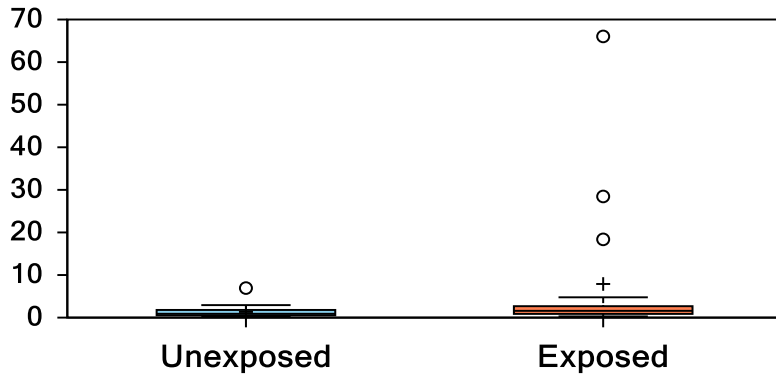

X - 13512

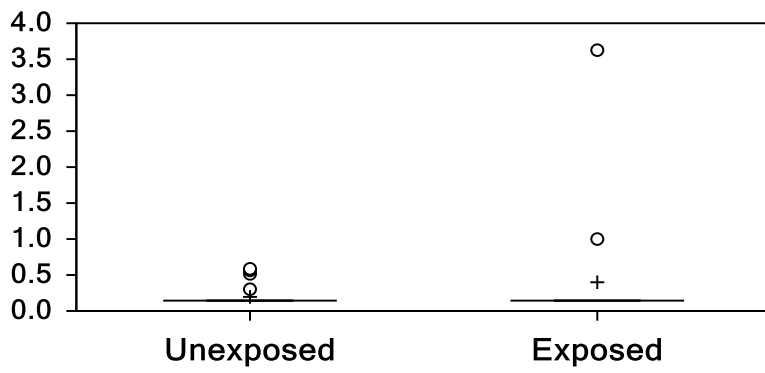

X - 13581

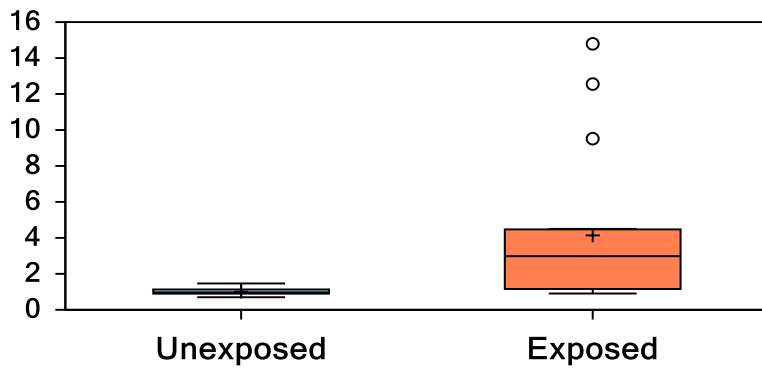

X - 13687

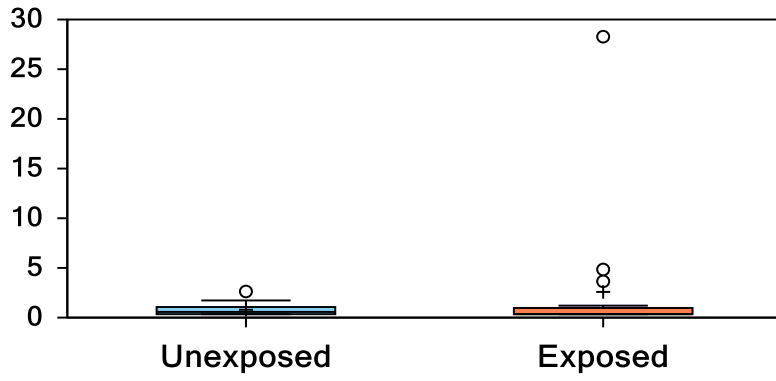

X - 13703

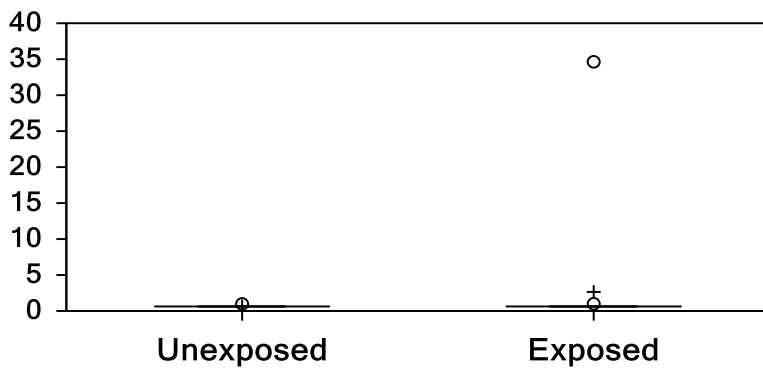

X - 13726

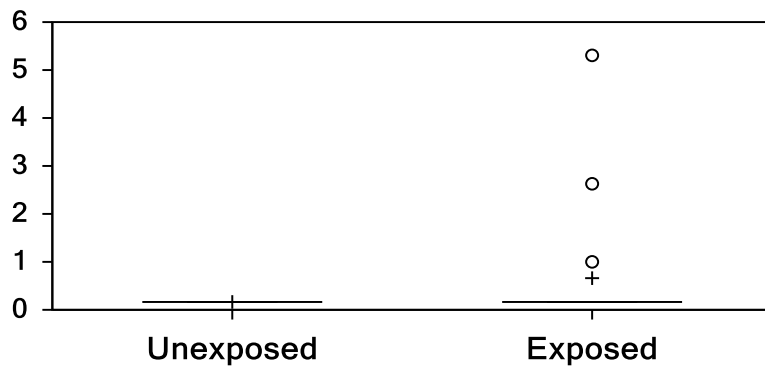



X - 13734

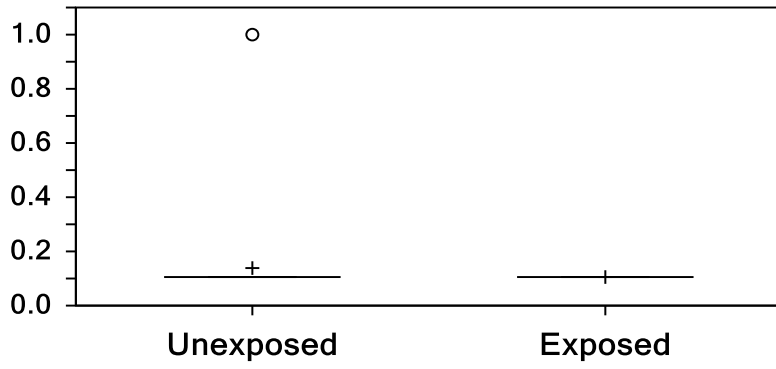

X - 13743

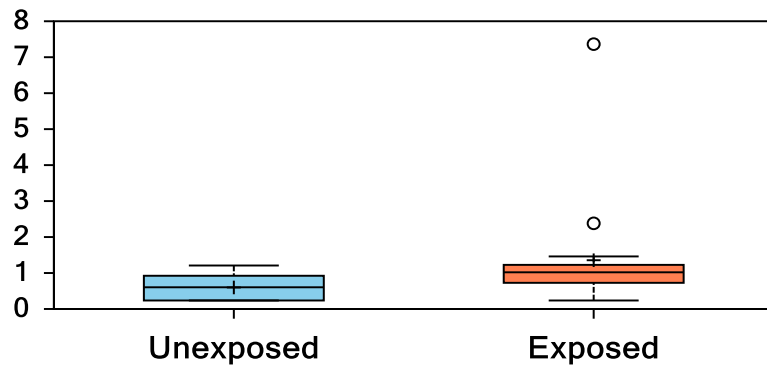

X - 13847

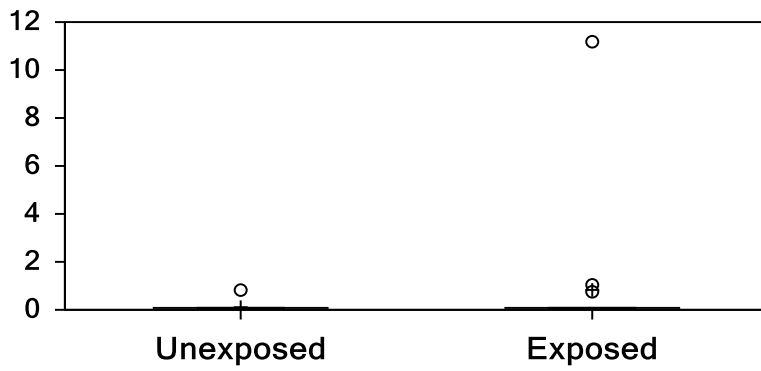

X - 13866

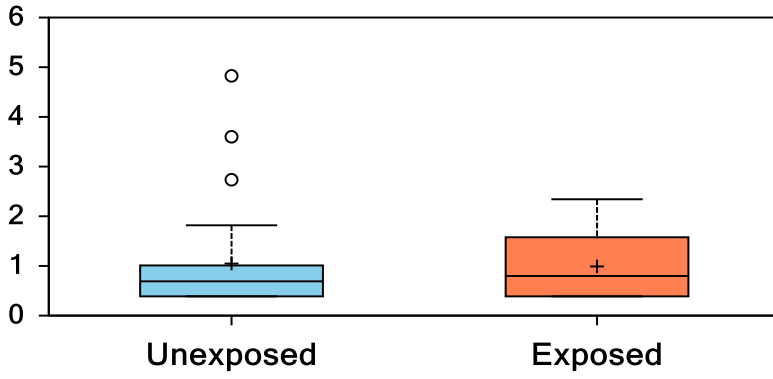

X - 14056

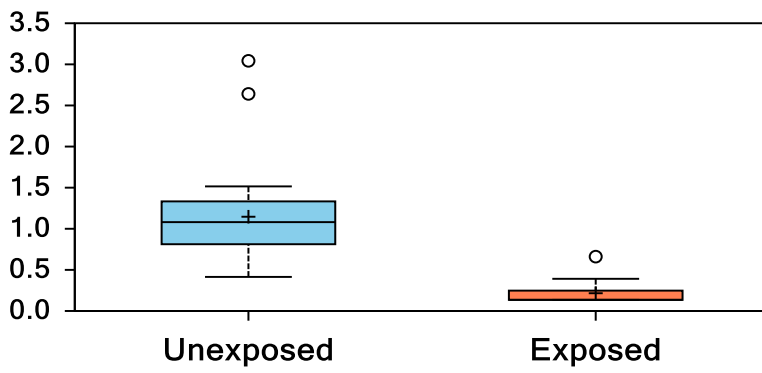

X - 14082

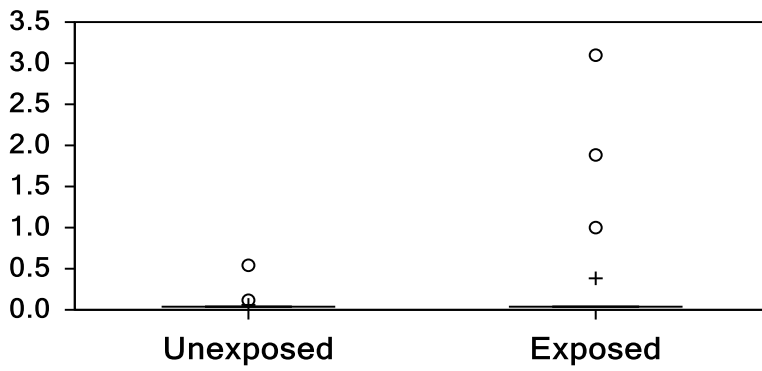

X - 14092

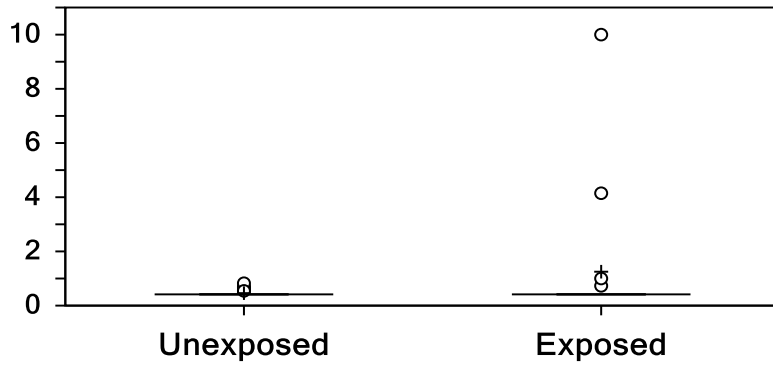

X - 14097

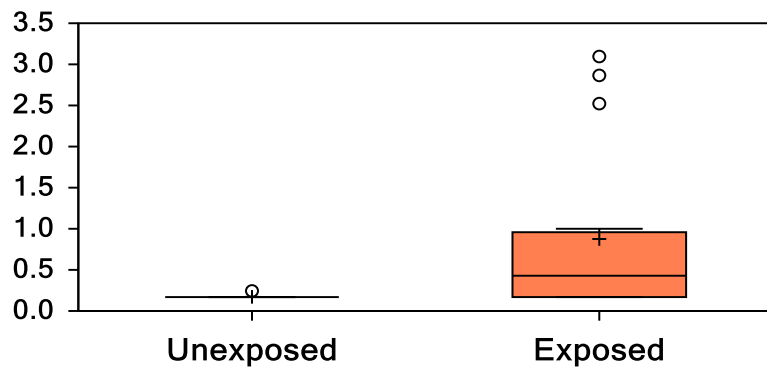

X - 14105

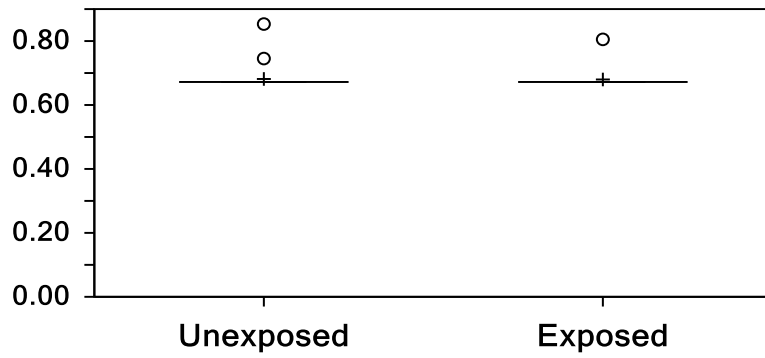

X - 14145

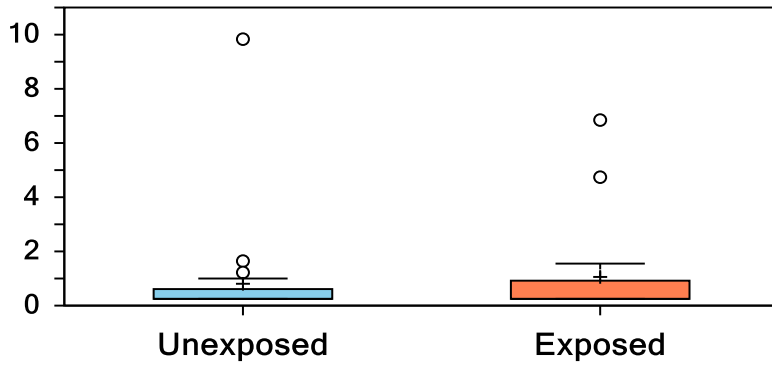

X - 14153

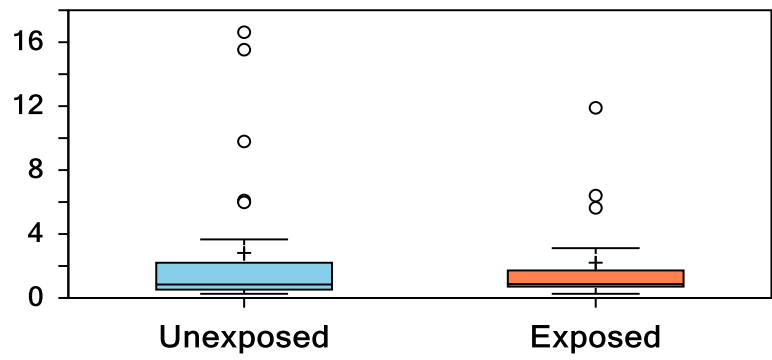

X - 14192

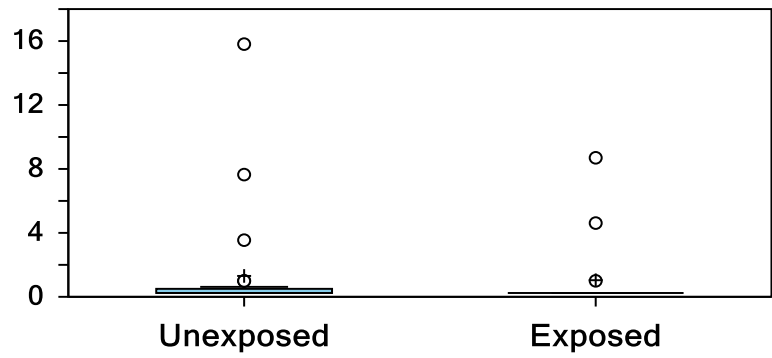

X - 14196

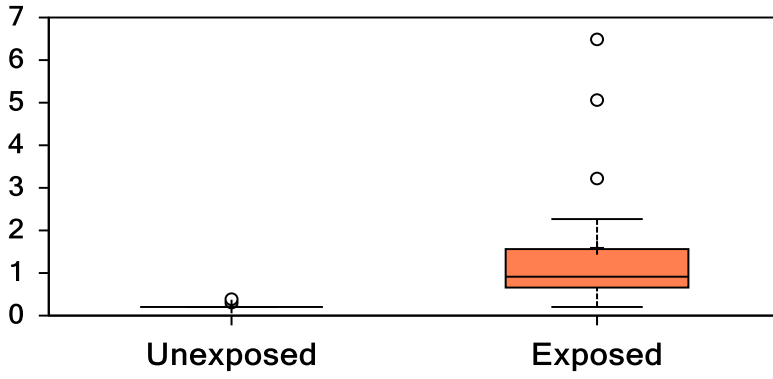

X - 14216

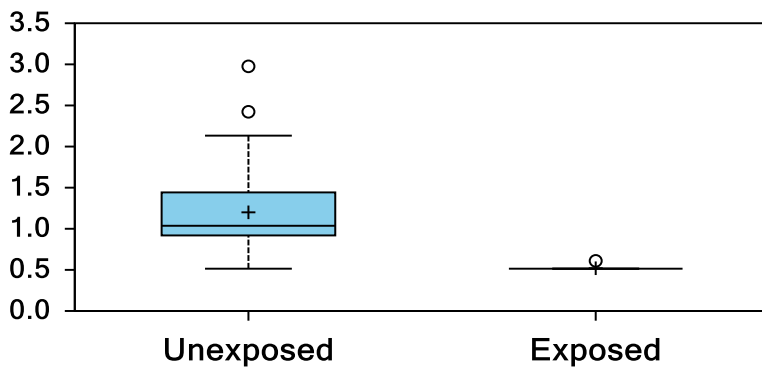

X - 14256

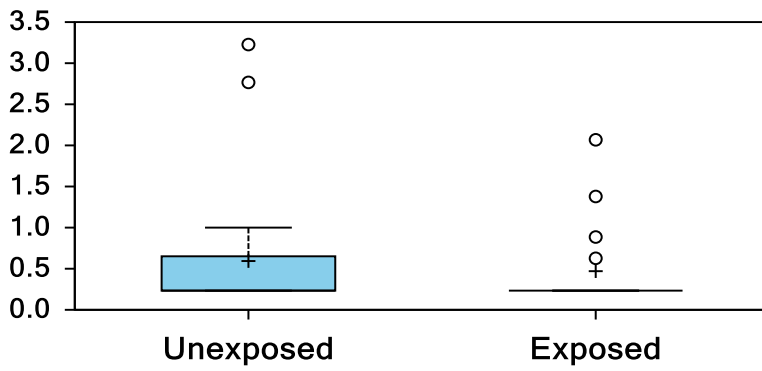

X - 14302

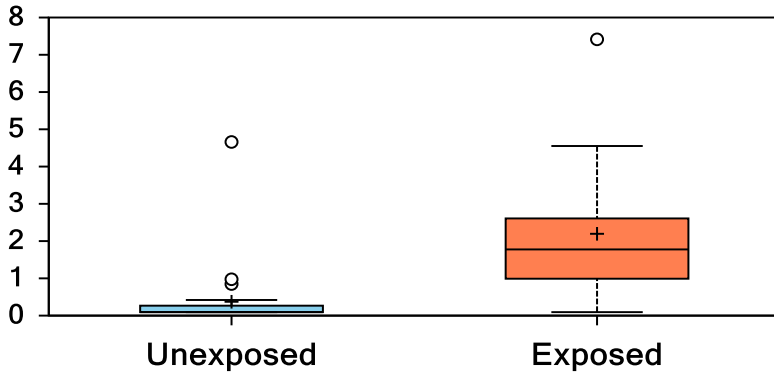

X - 14352

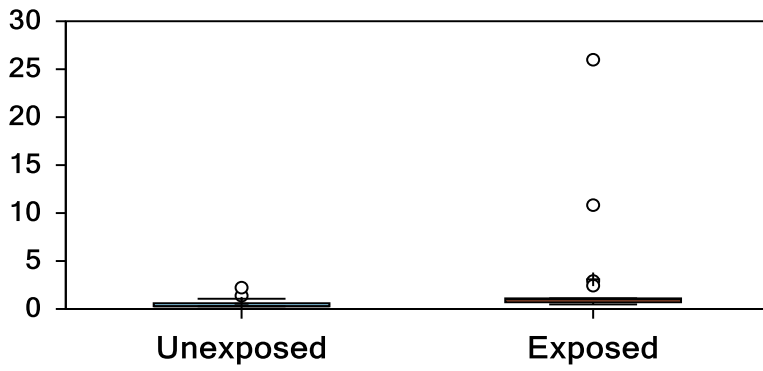

X - 14374

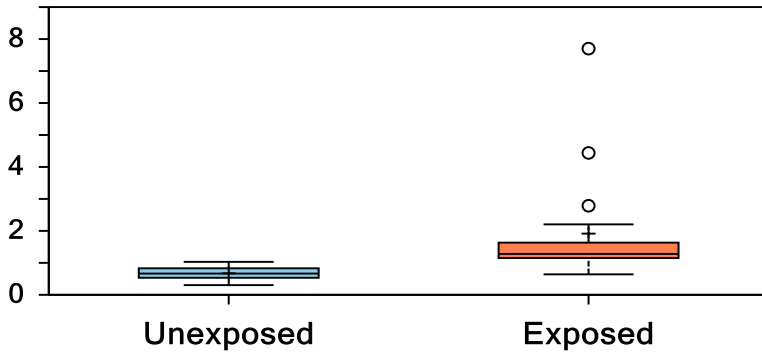

X - 14445

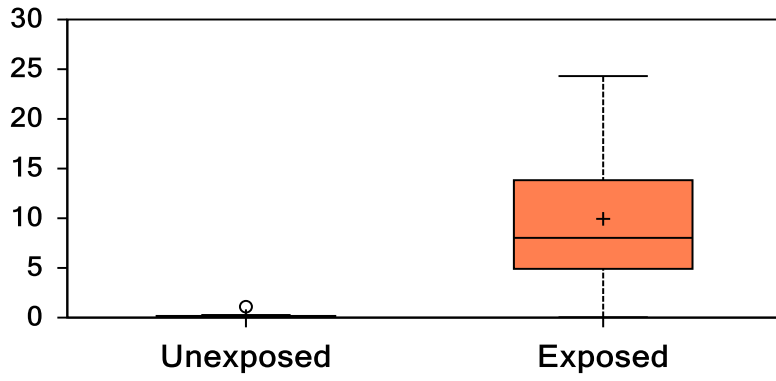

X - 14473

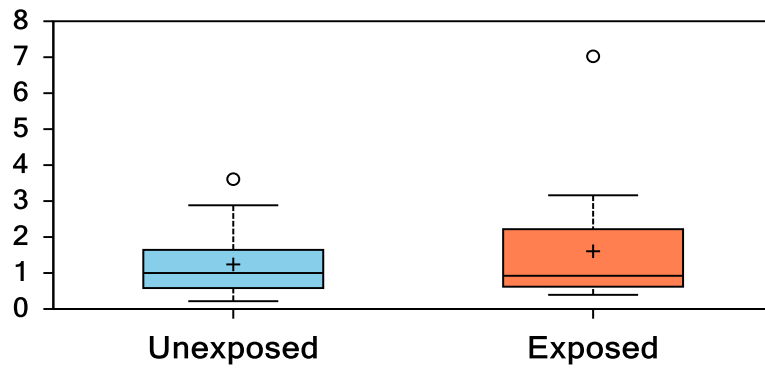

X - 14567

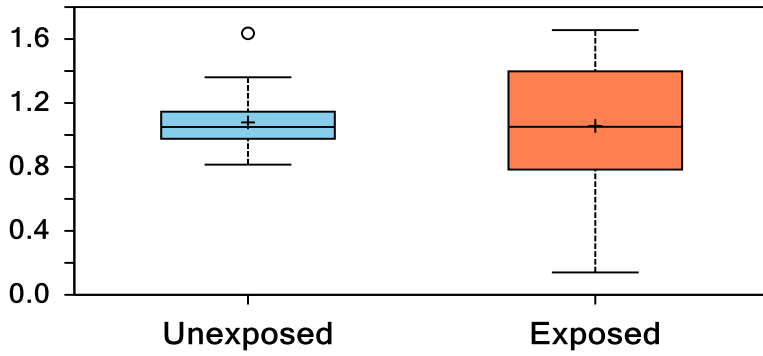

X - 14620

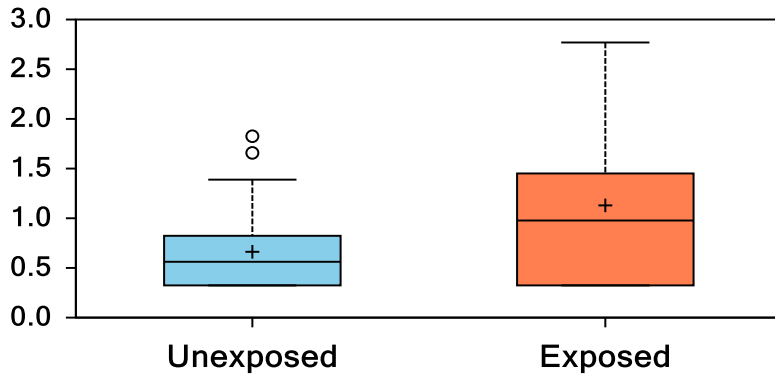

X - 14662

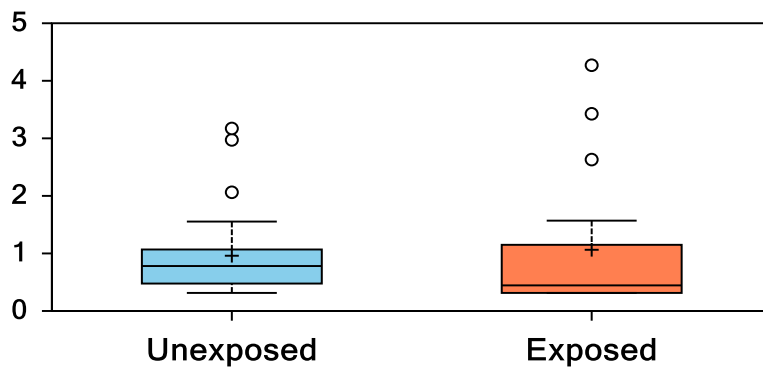

X - 14904

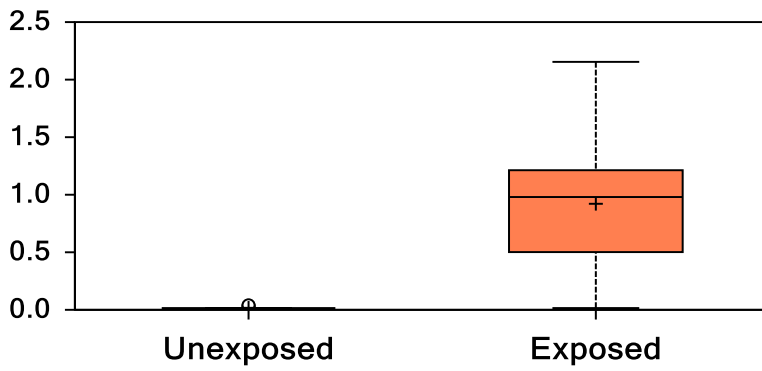



X - 14955

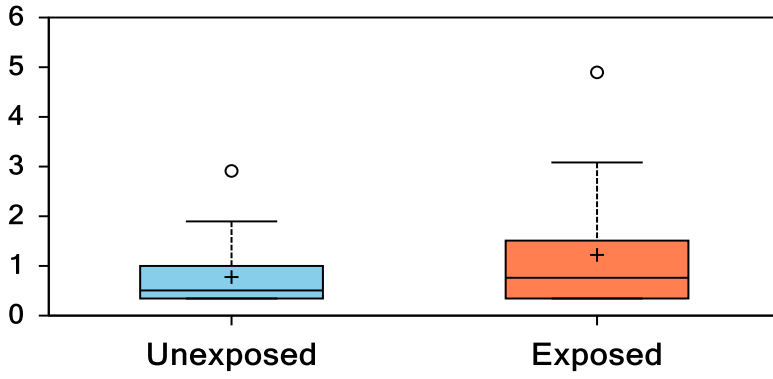

X - 15222

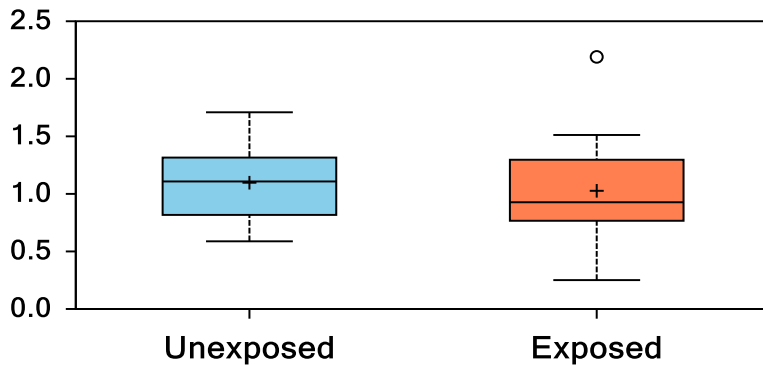

X - 15382

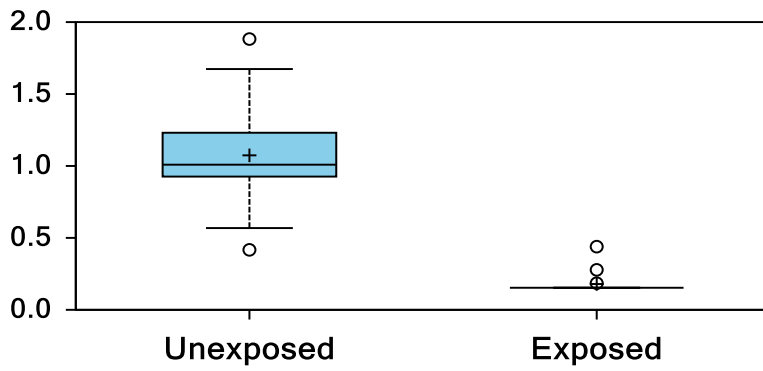

X - 15483

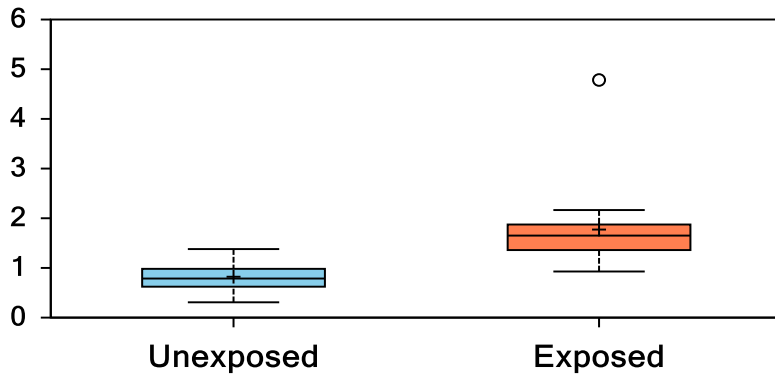

X - 15503

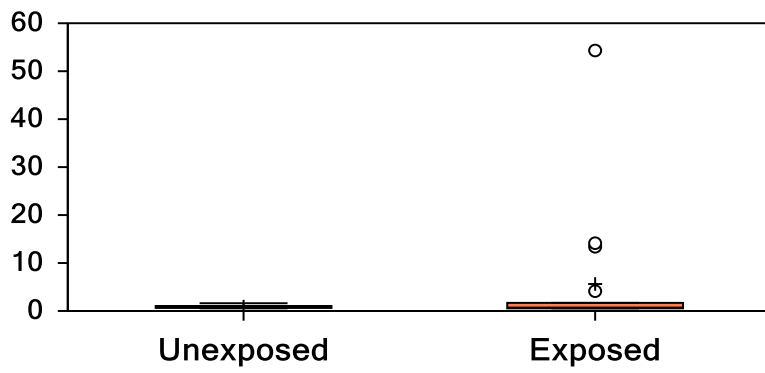

X - 15559

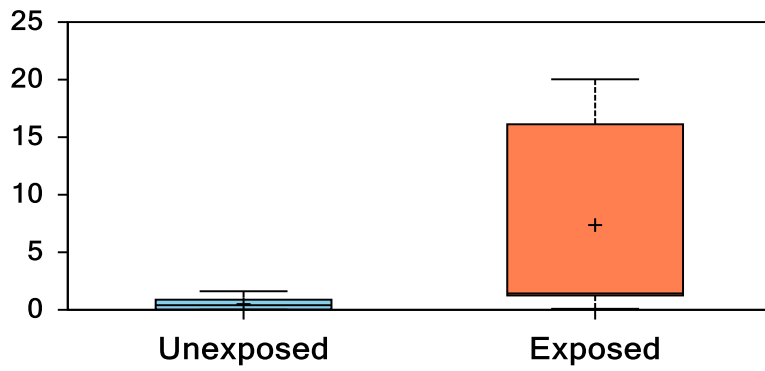

X - 15572

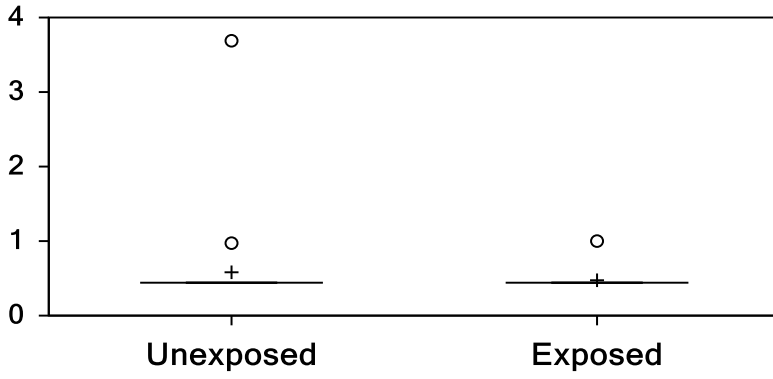

X - 15650

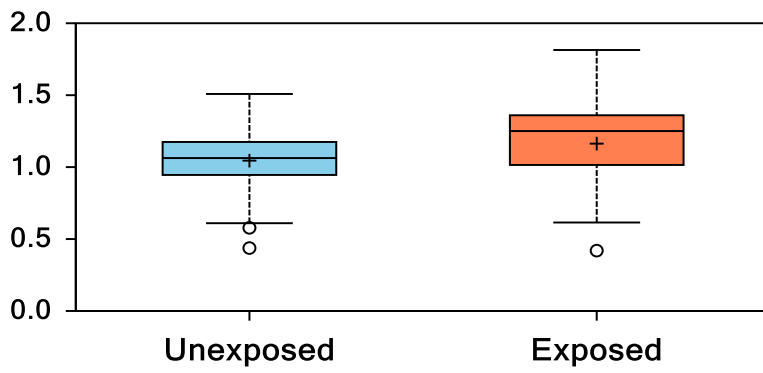

X - 15678

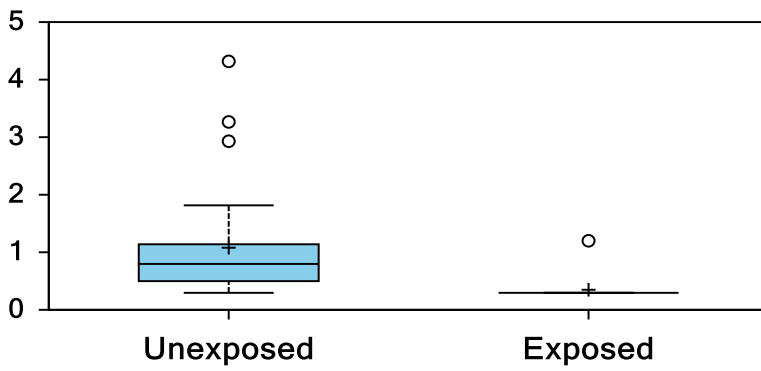

X - 15707

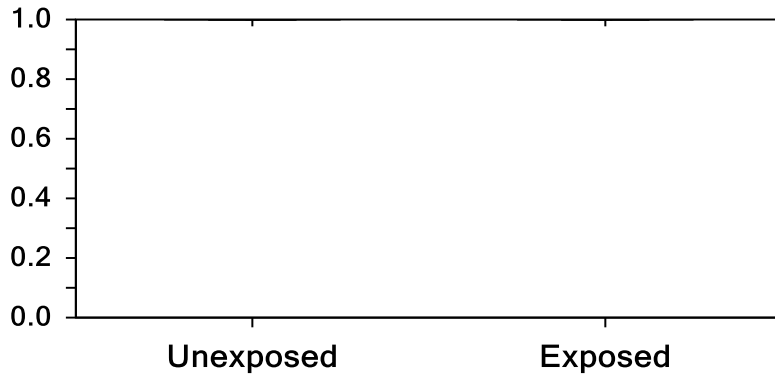

X - 15728

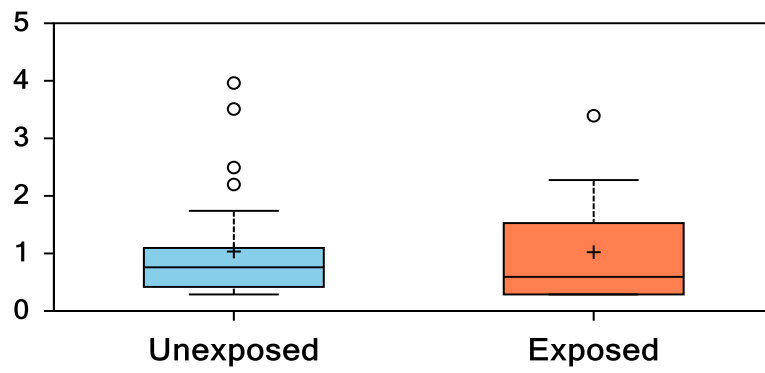

X - 15737

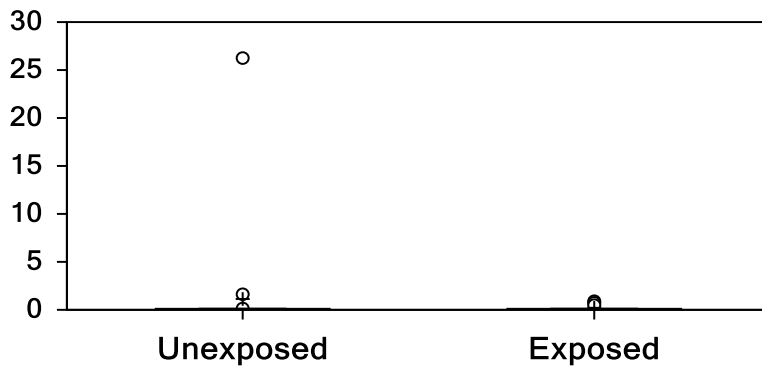

X - 15845

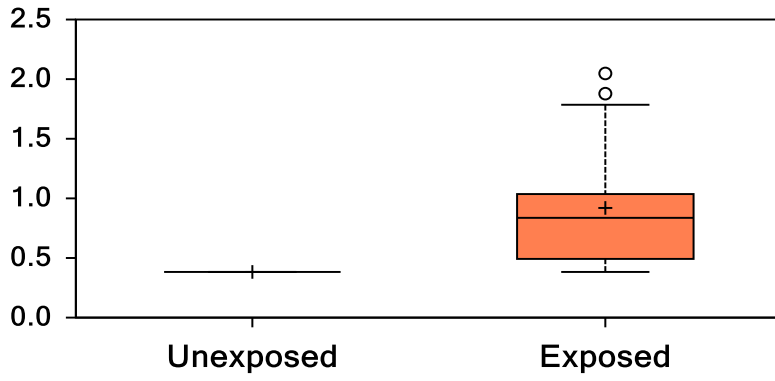

X - 16033

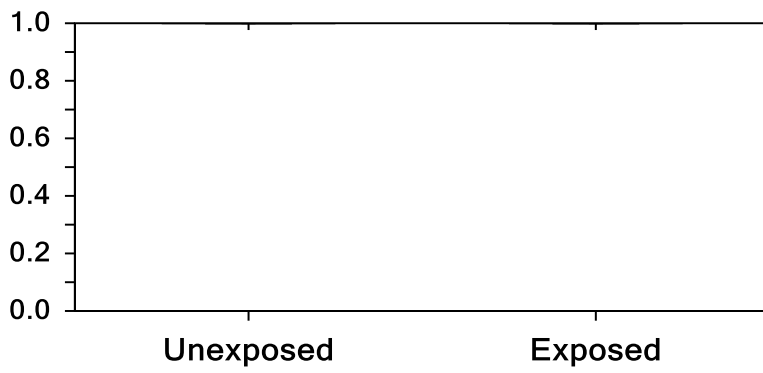

X - 16083

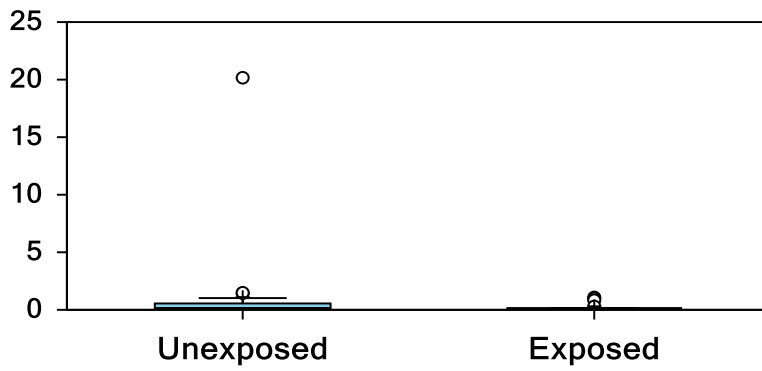

X - 16103

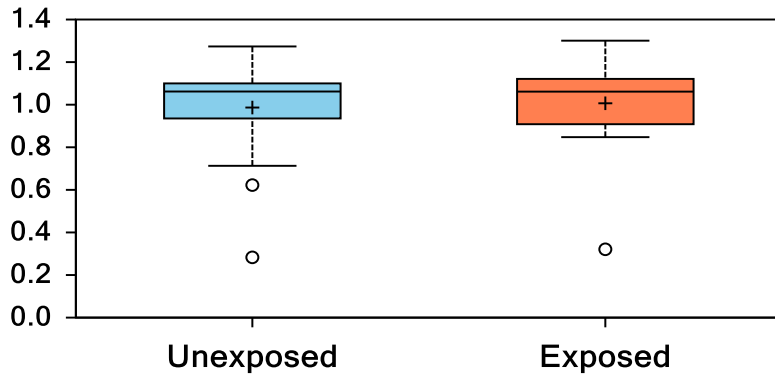

X - 16123

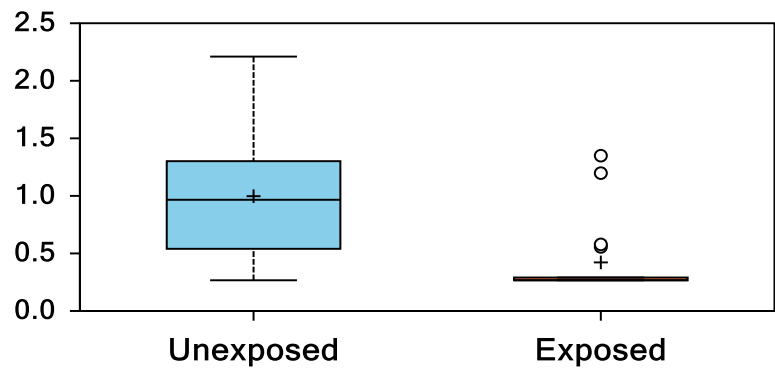

X - 16128

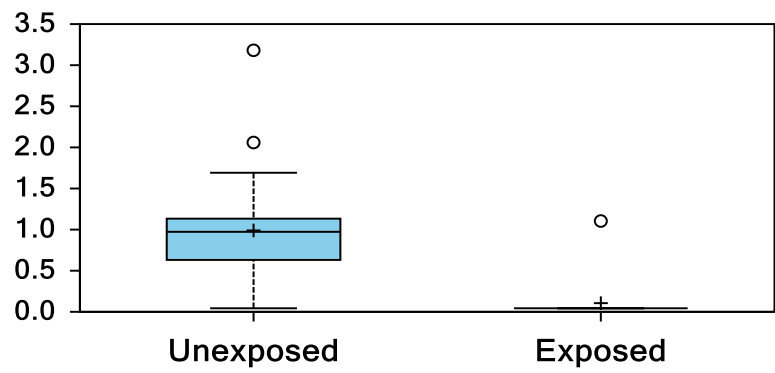

X - 16131

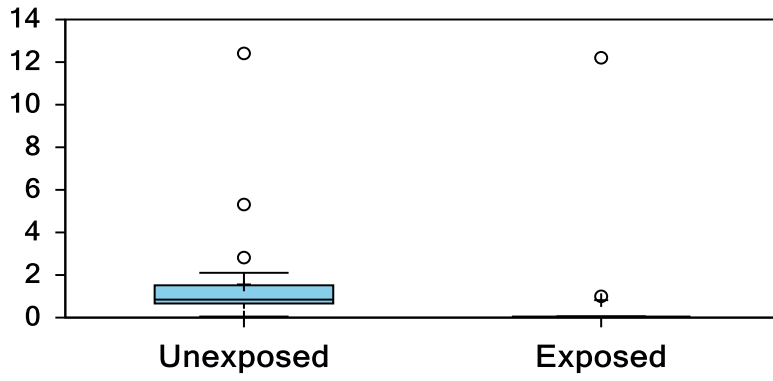

X - 16134

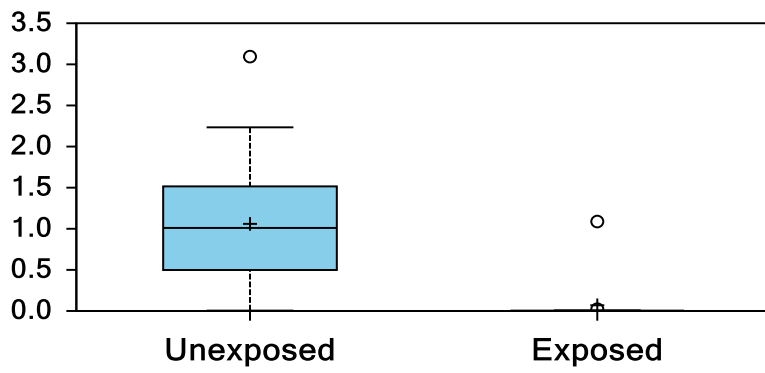

X - 16137

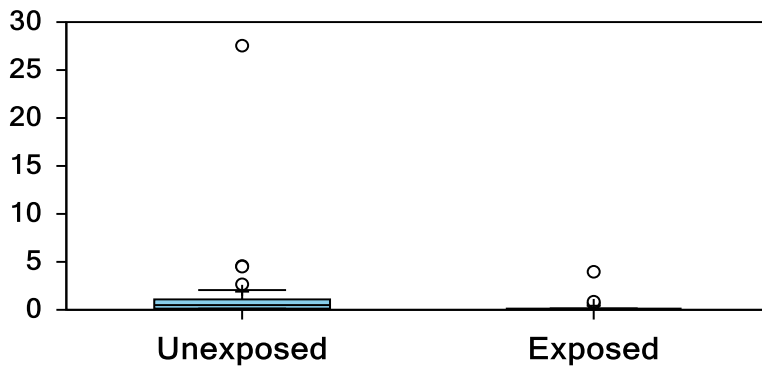

X - 16209

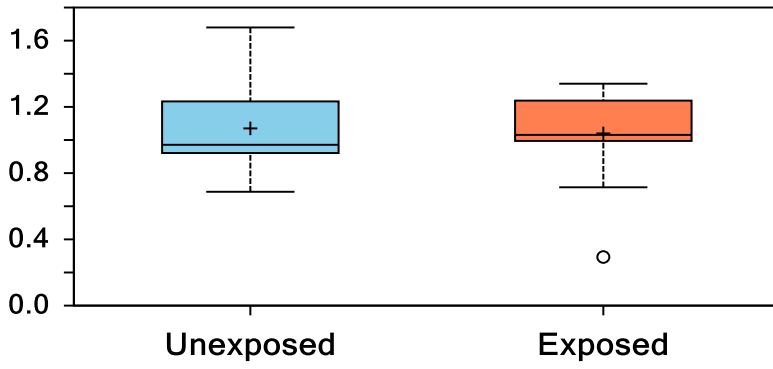

X - 16296

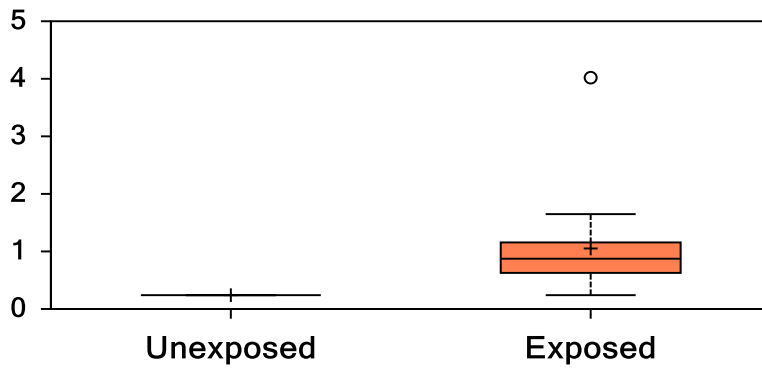

X - 16323

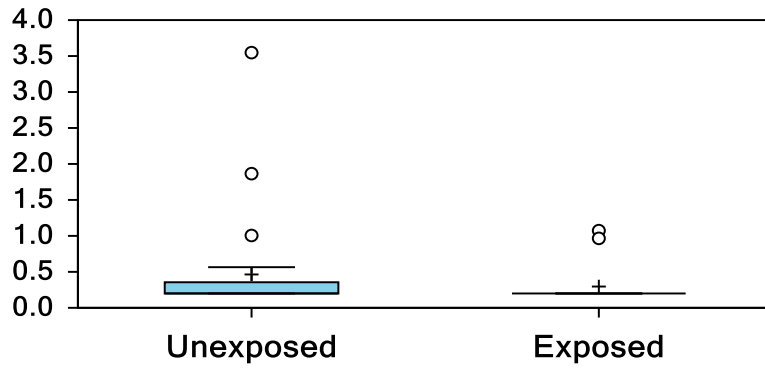



X - 16394

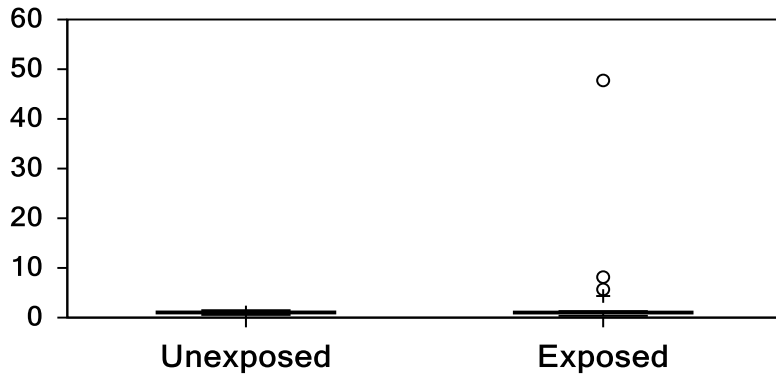

X - 16444

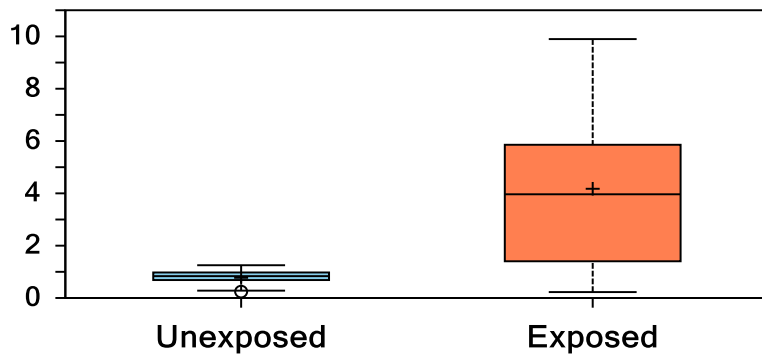

X - 16458

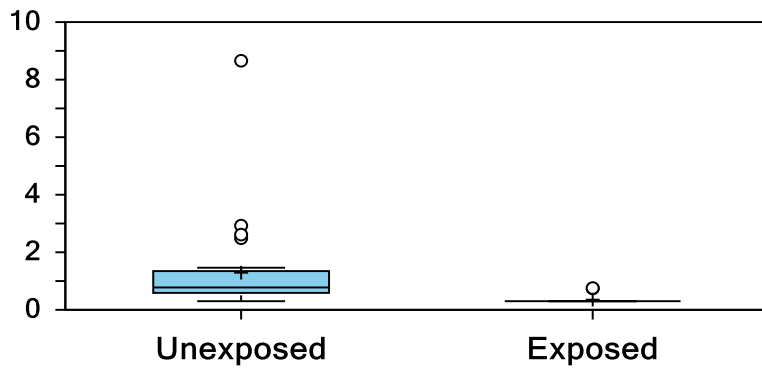

X - 16475

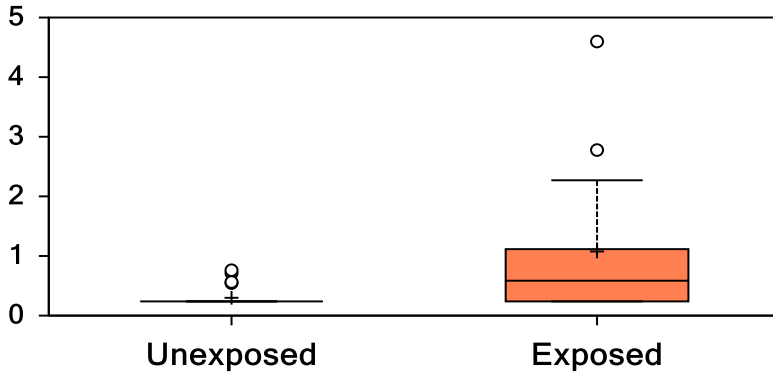

X - 16570

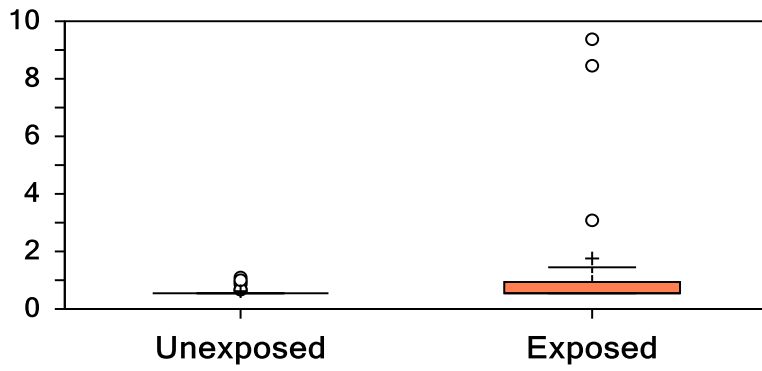

X - 16581

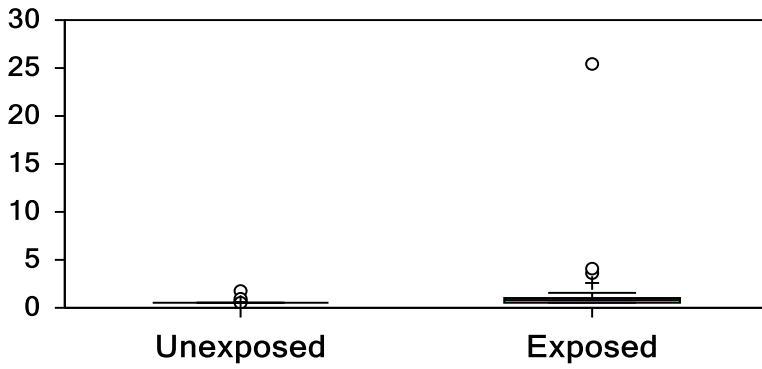

X - 16651

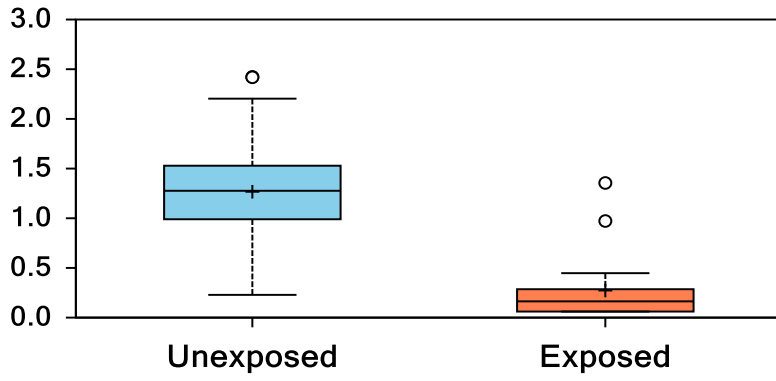

X - 16773

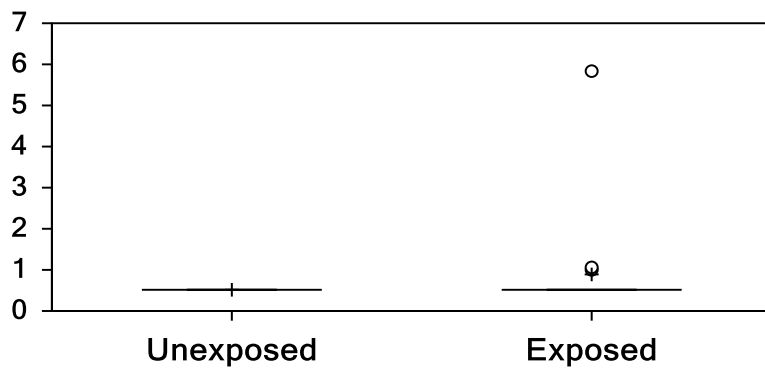

X - 16932

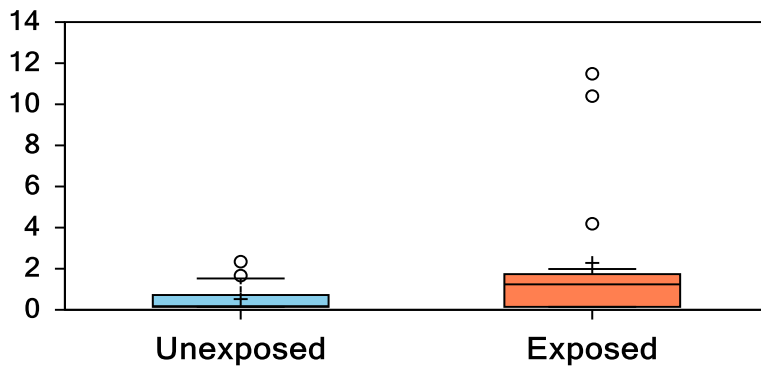

X - 16935

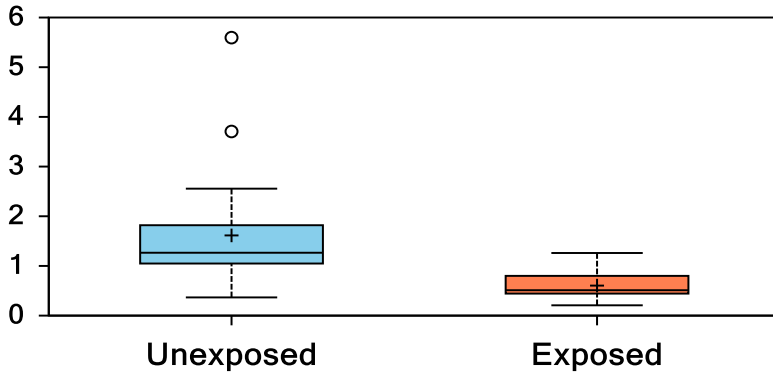

X - 16943

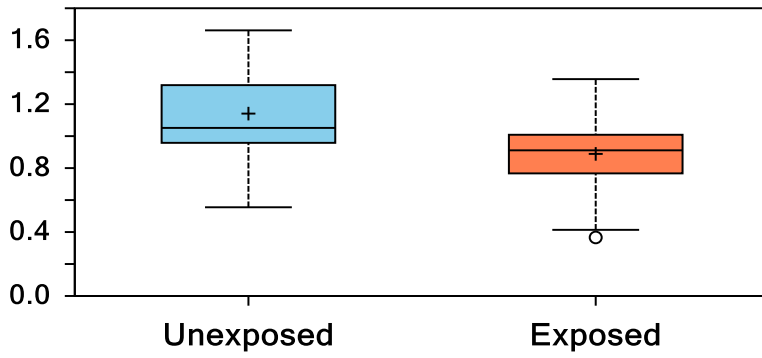

X - 16946

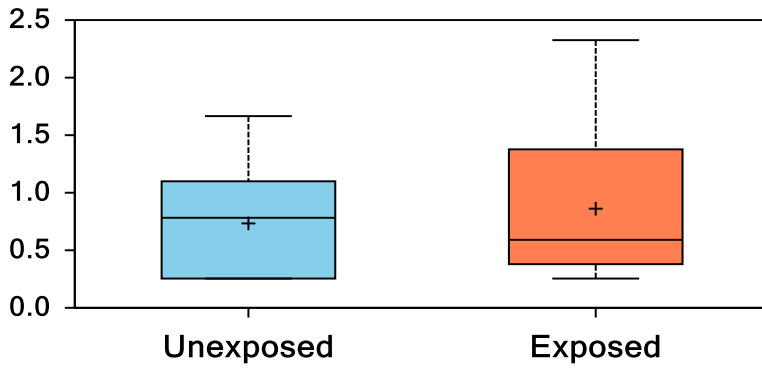

X - 16990

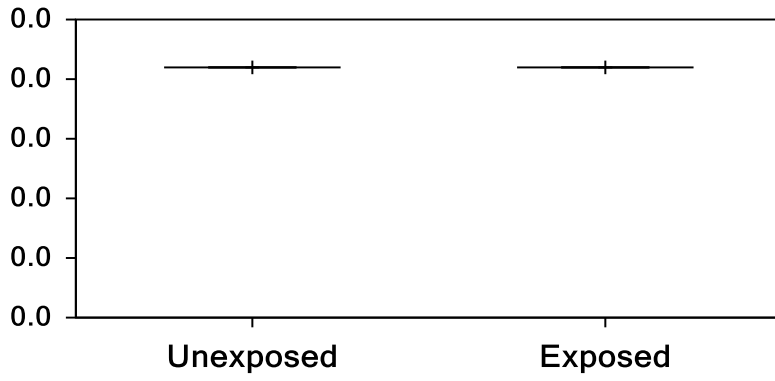

X - 17065

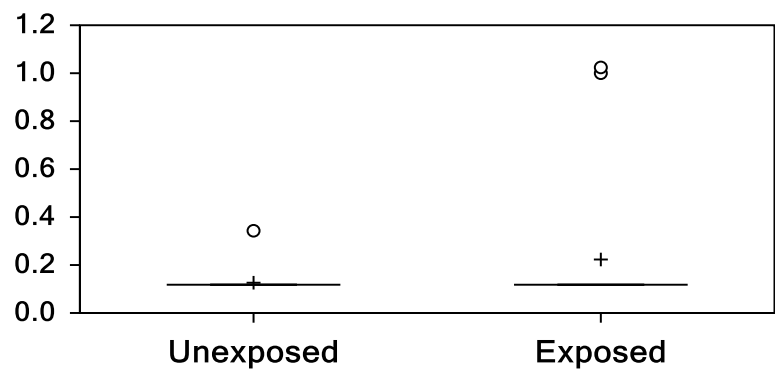

X - 17137

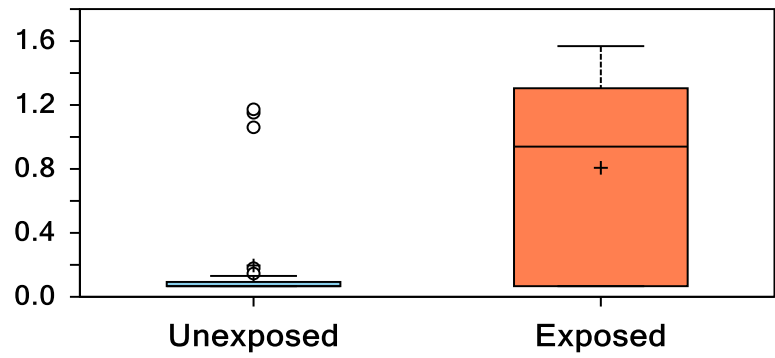

X - 17146

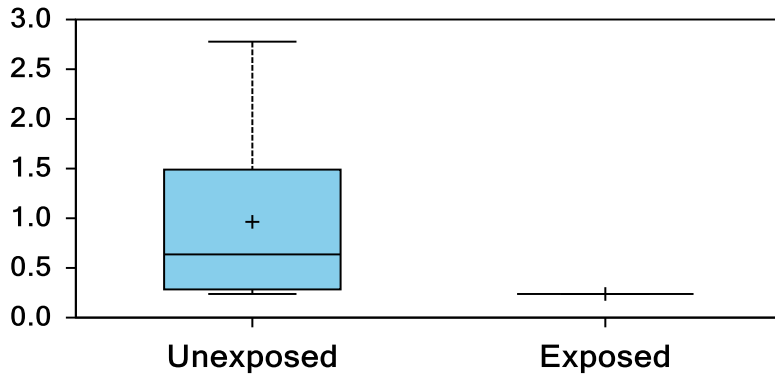

X - 17151

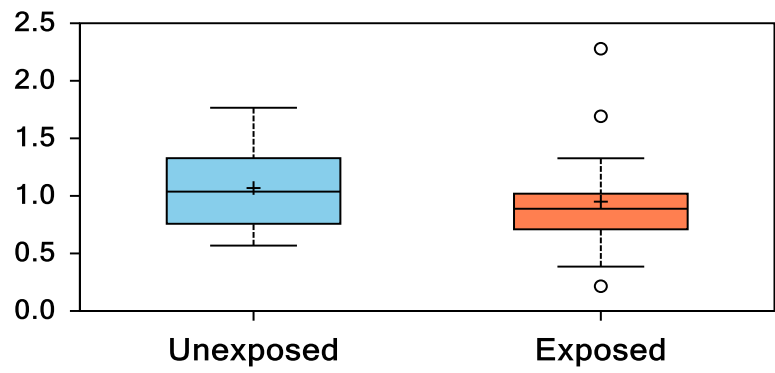

X - 17167

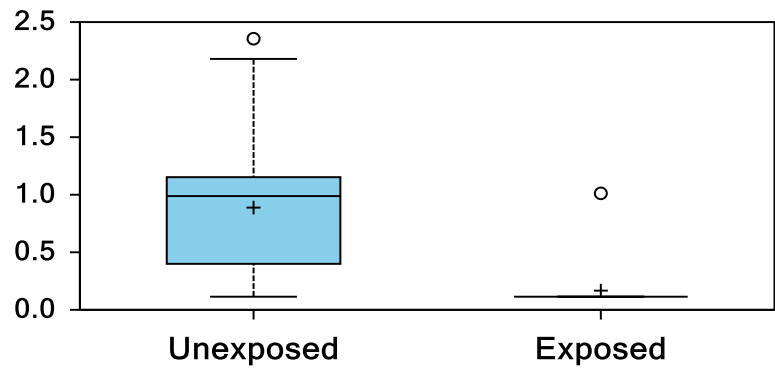

X - 17185

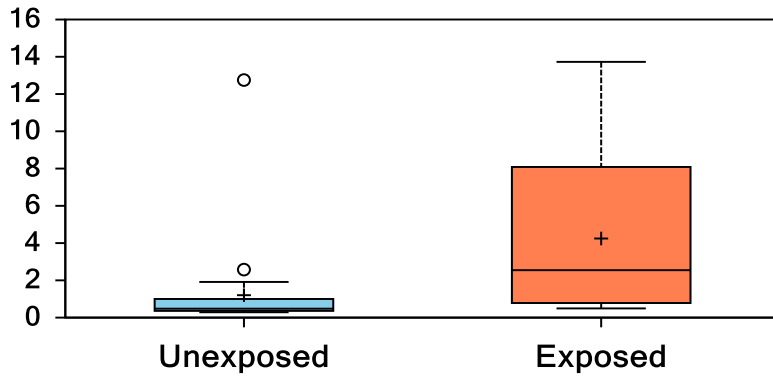

X - 17193

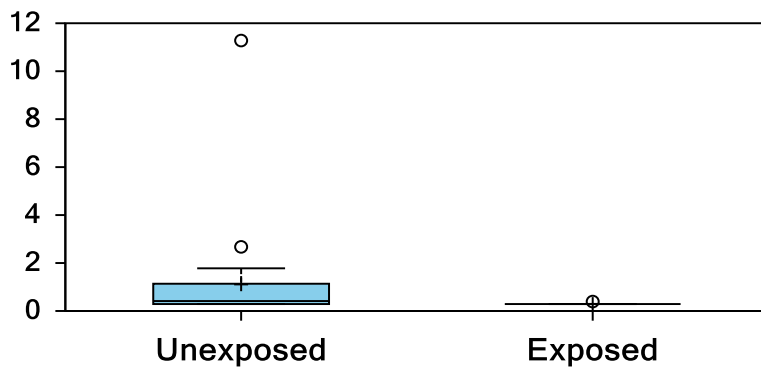

X - 17299

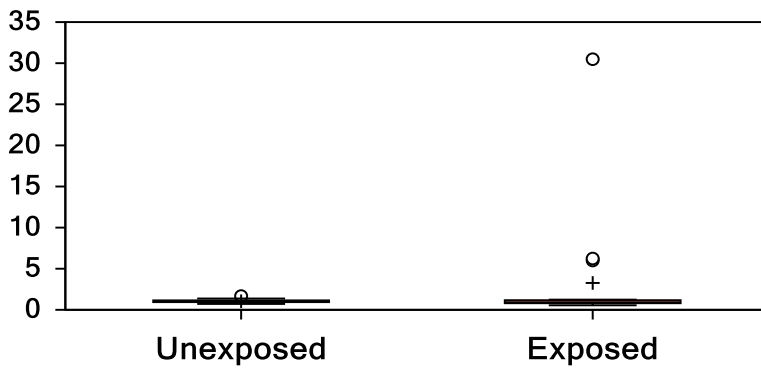

X - 17305

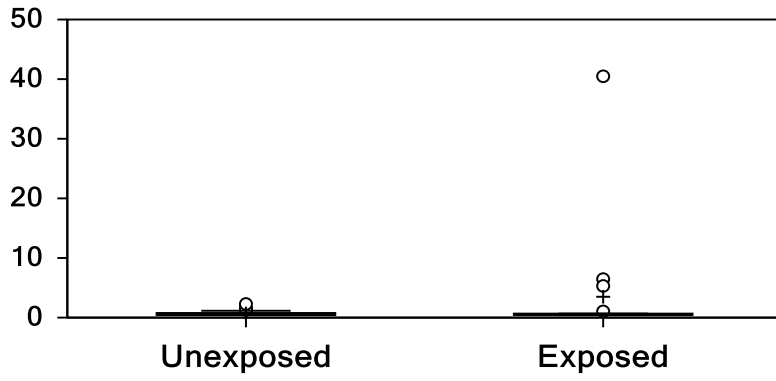

X - 17314

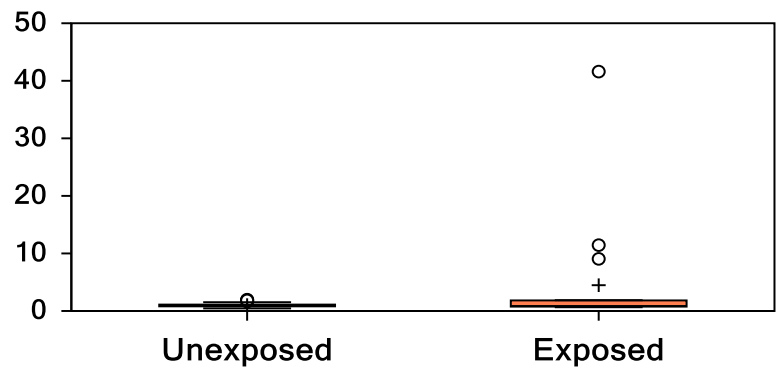

X - 17320

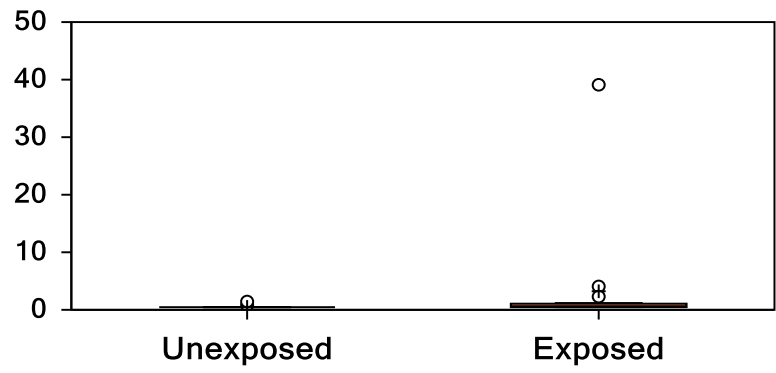



X - 17325

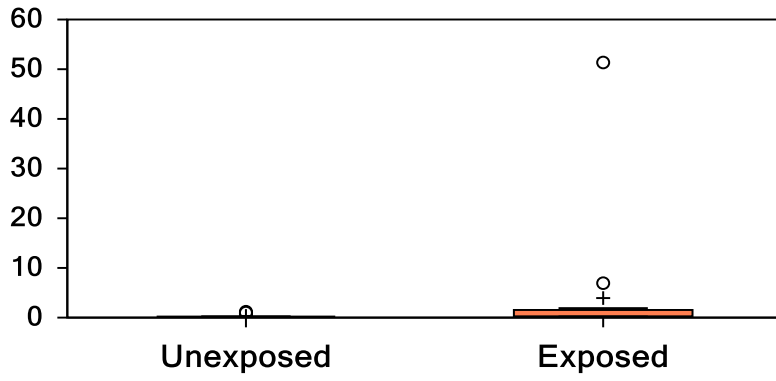

X - 17328

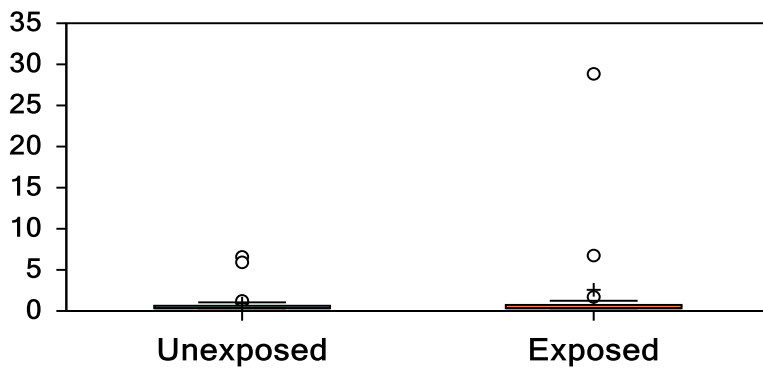

X - 17335

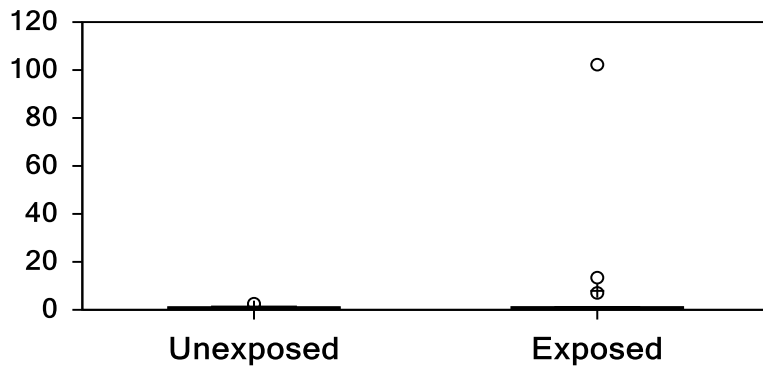

X - 17339

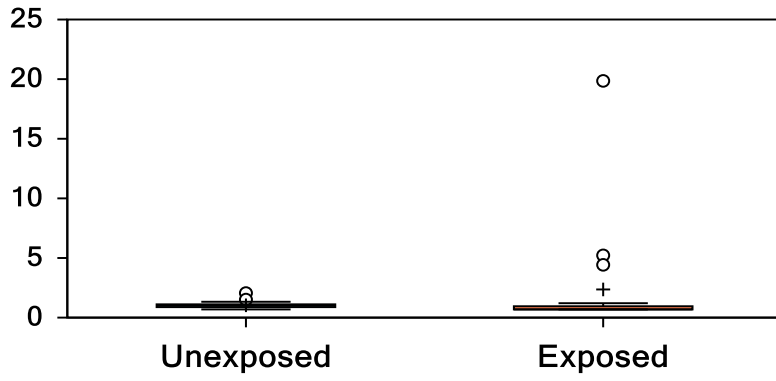

X - 17342

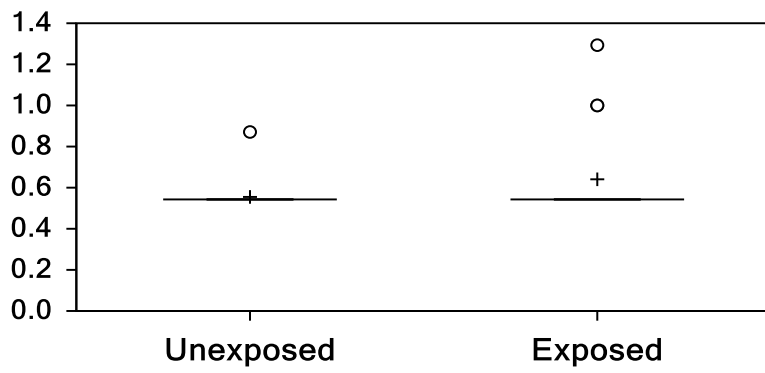

X - 17350

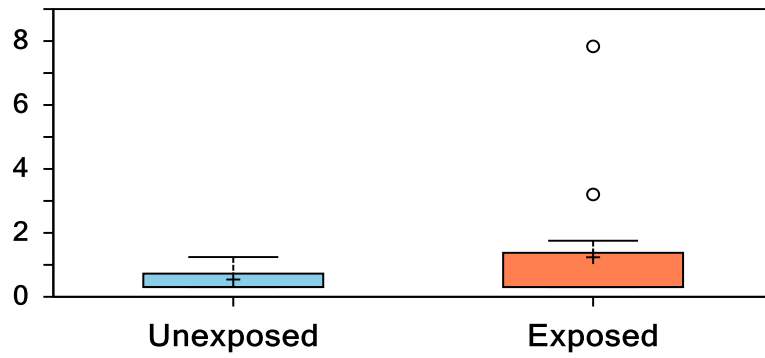

X - 17354

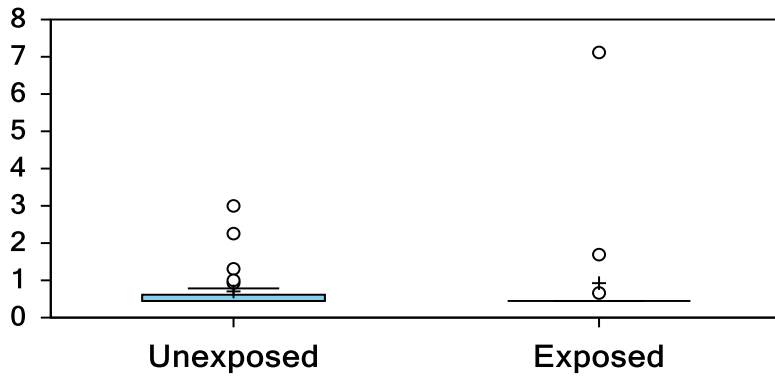

X - 17359

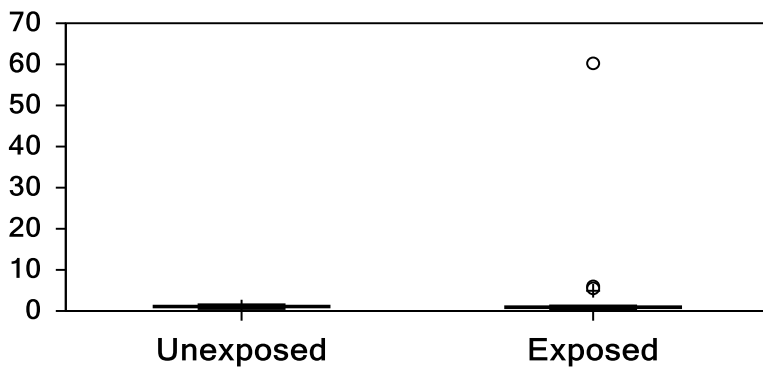

X - 17368

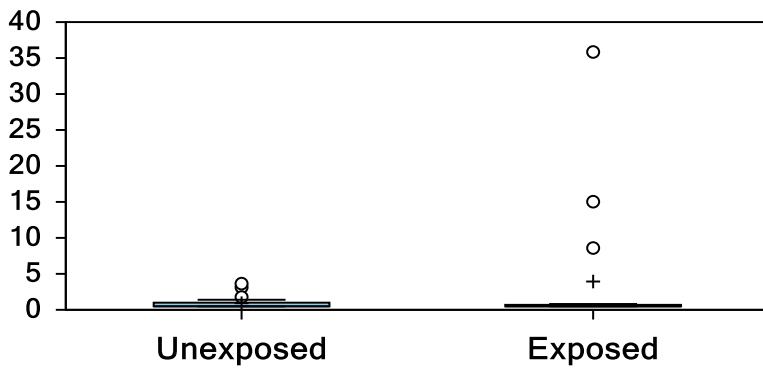

X - 17445

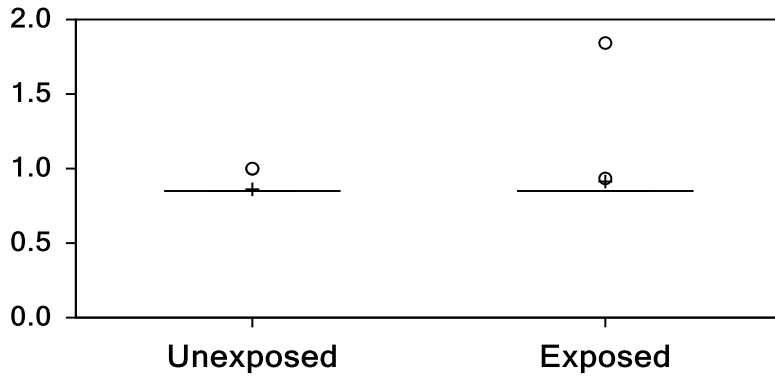

X - 17457

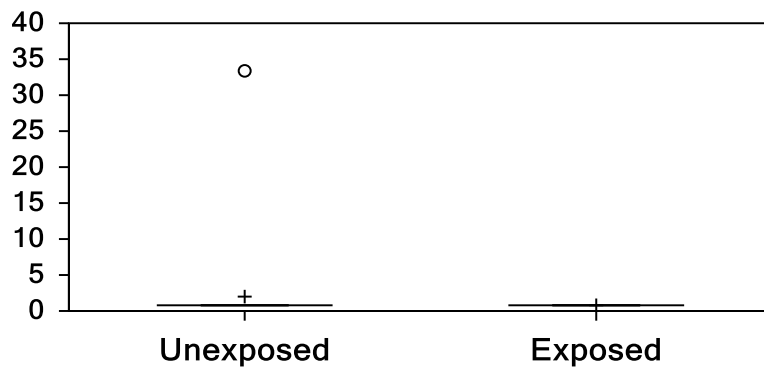

X - 17463

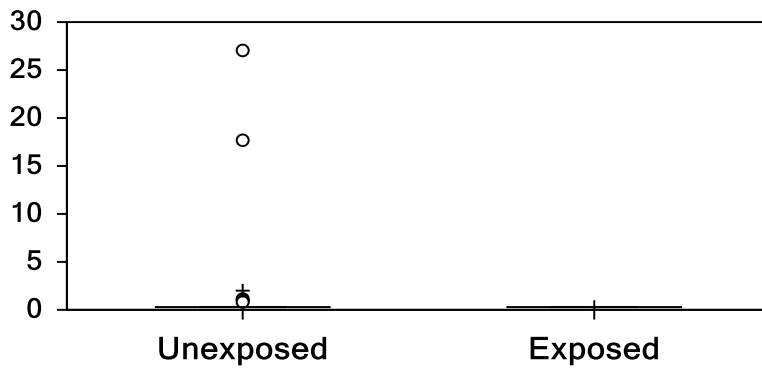

X - 17543

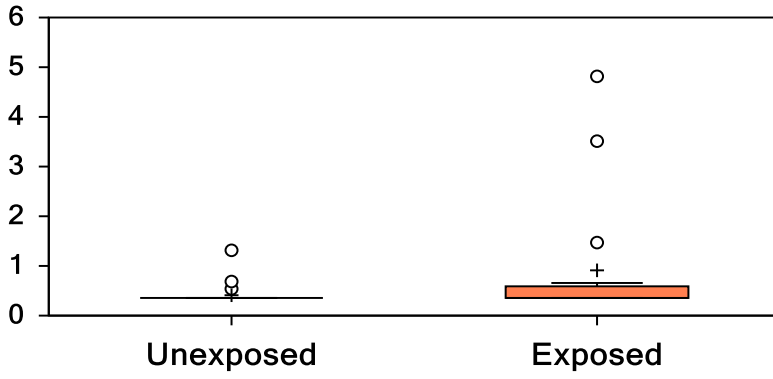

X - 17651

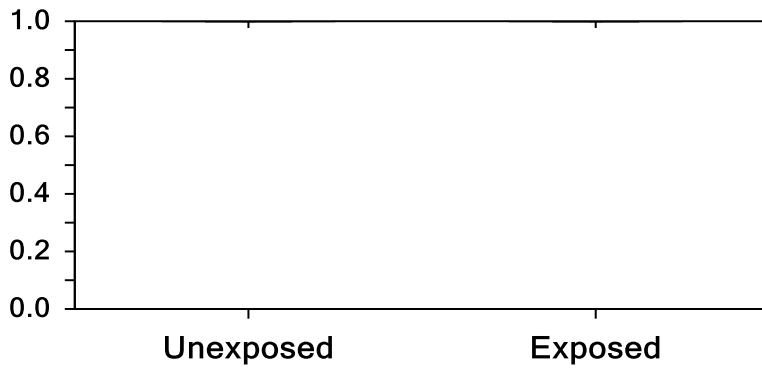

X - 17656

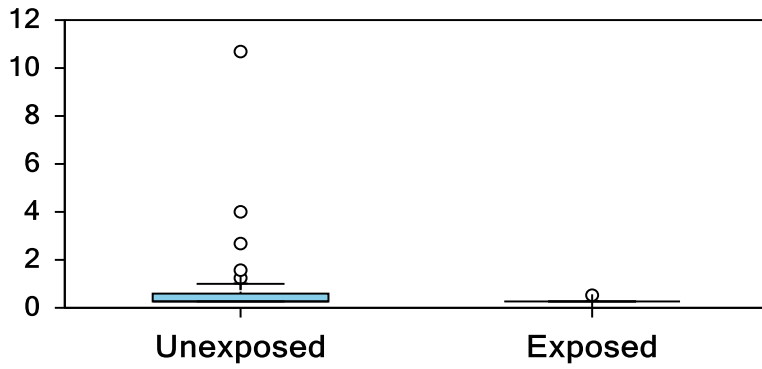

X - 17686

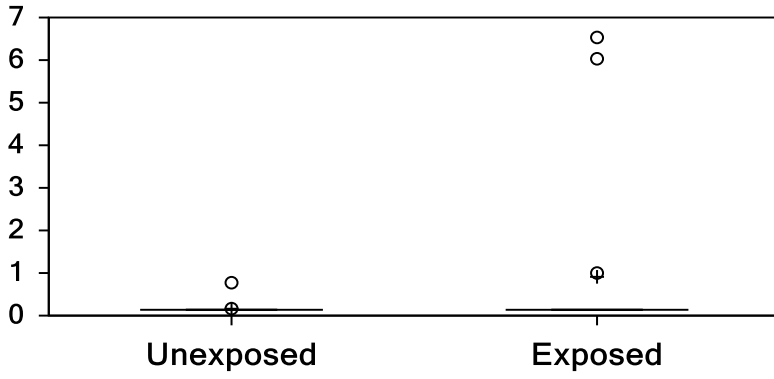

X - 17692

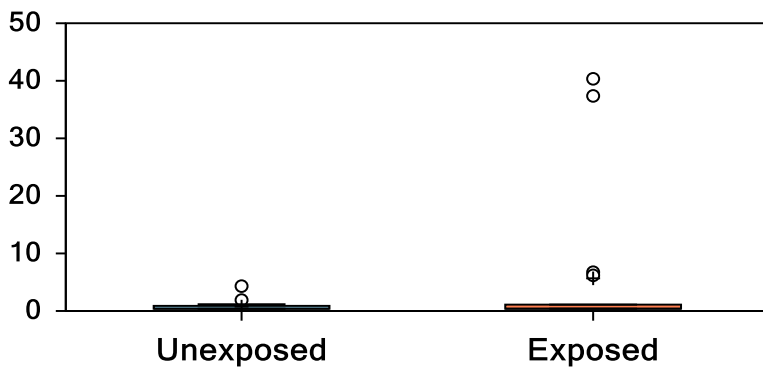

X - 17705

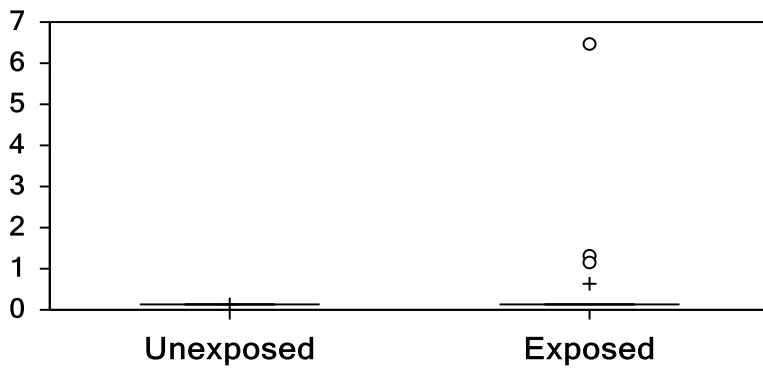

X - 17717

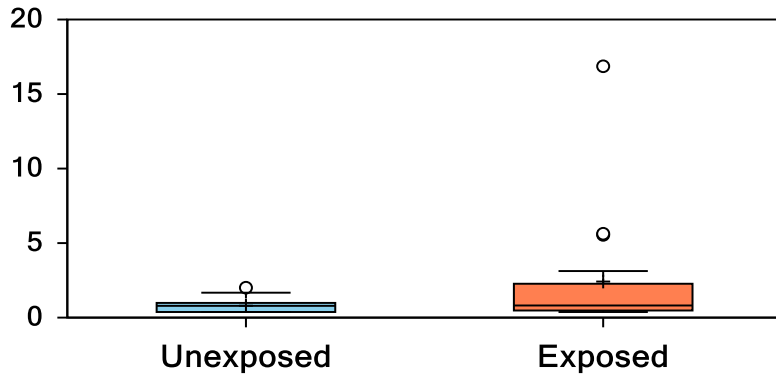

X - 17735

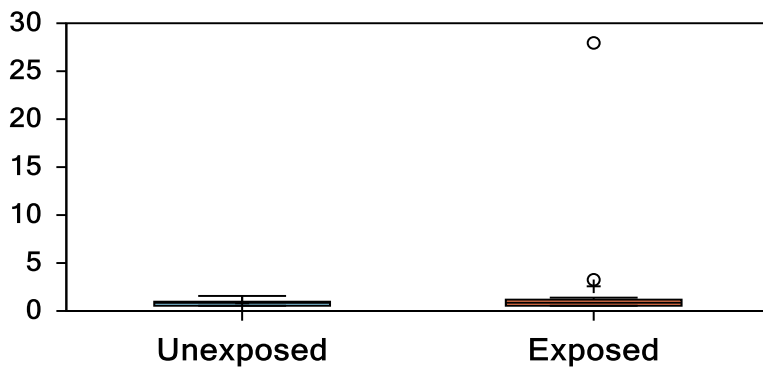

X - 17825

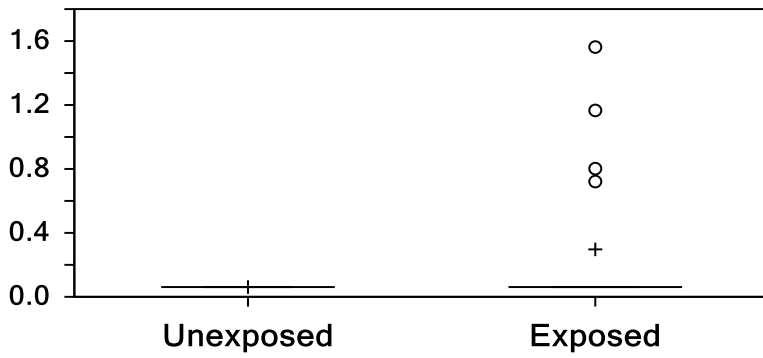

X - 17969

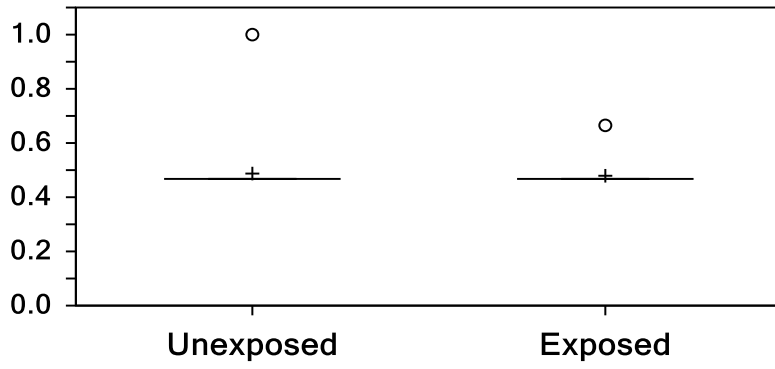

X - 18059

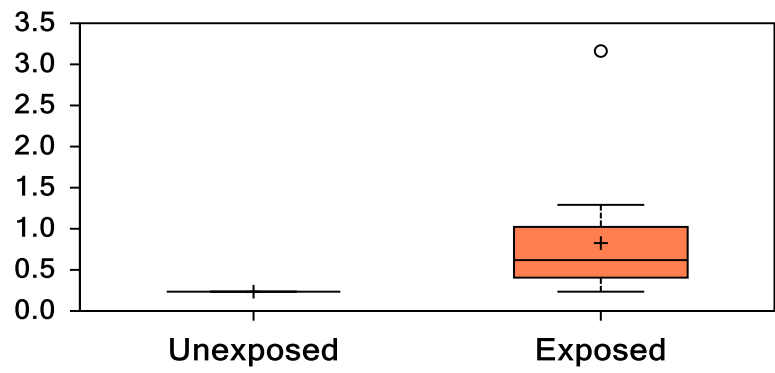

X - 18165

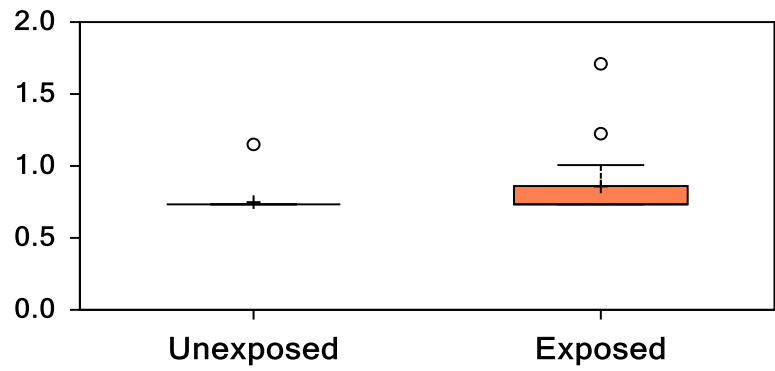



### X - 18249

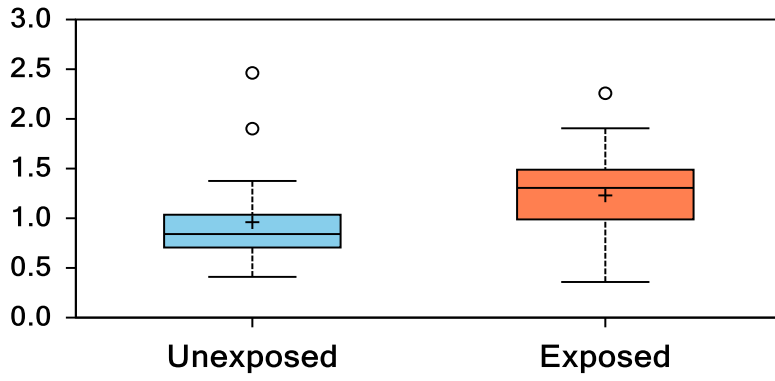

### xanthurenate

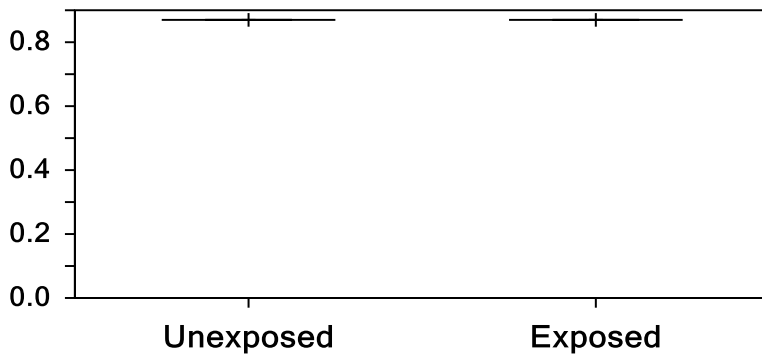

### xylonate

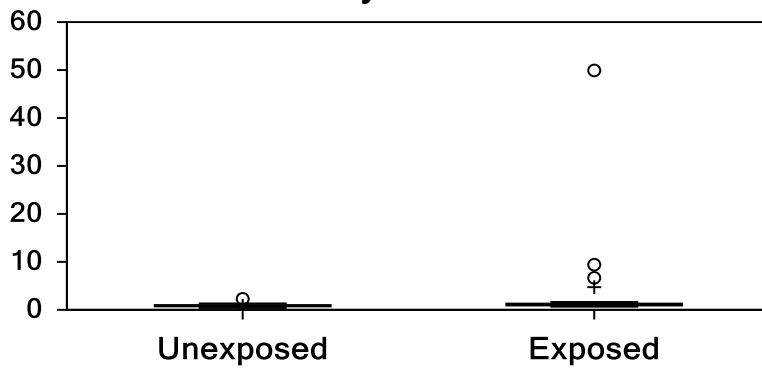

### 1,2-propanediol

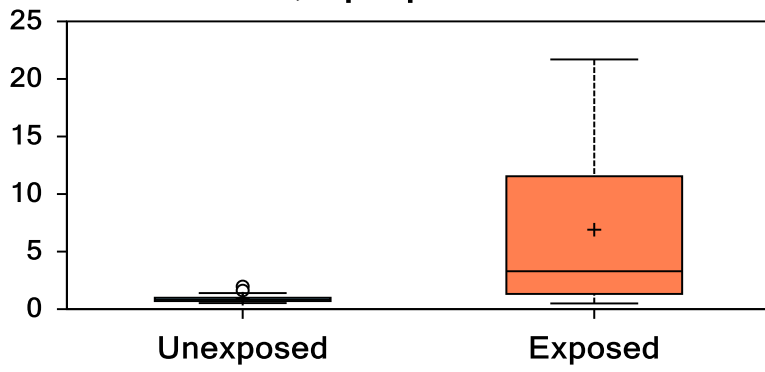

### 1,7-dimethylurate

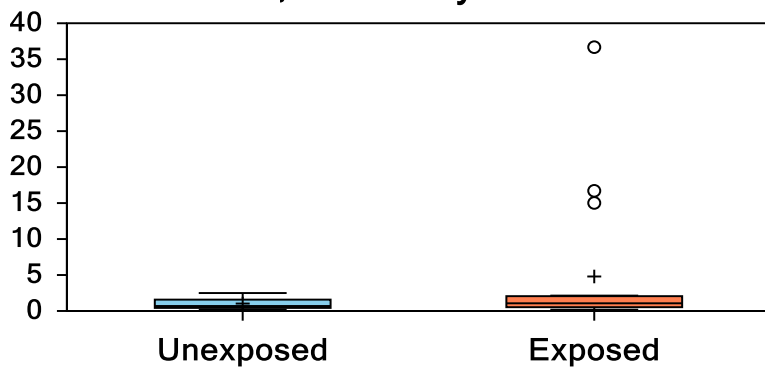

### 10-undecenoate (11:1n1)

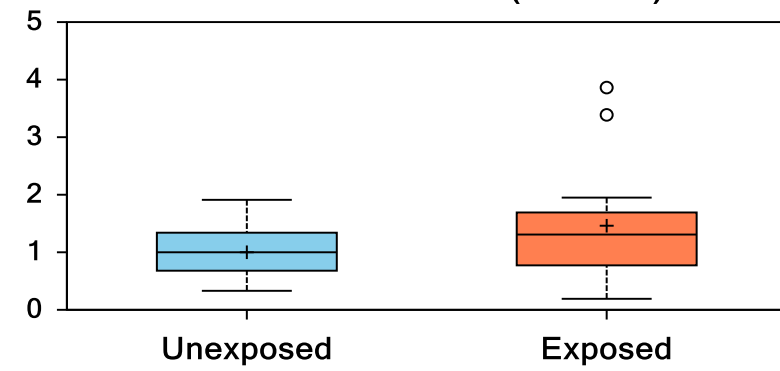

### 13-methylmyristic acid

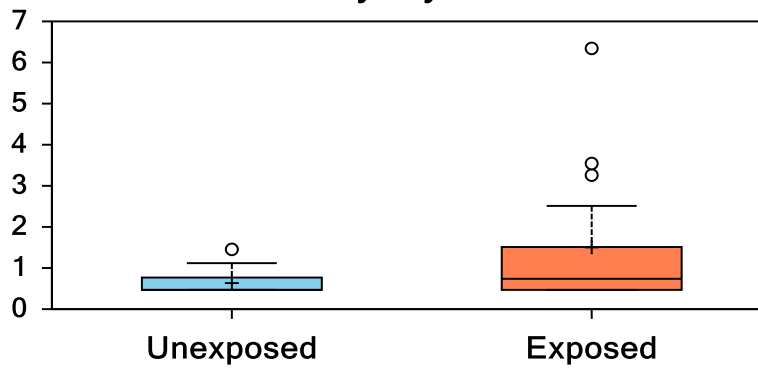

### 15-oxo-5Z,8Z,11Z,13E-eicosatetraenoal

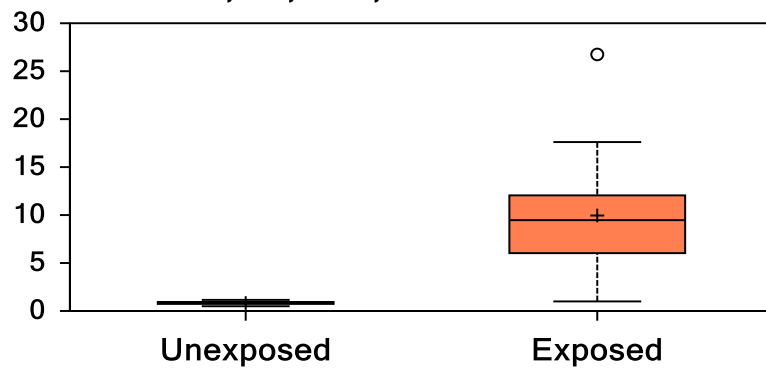

### 1-arachidonoylglycerophosphocholine\*

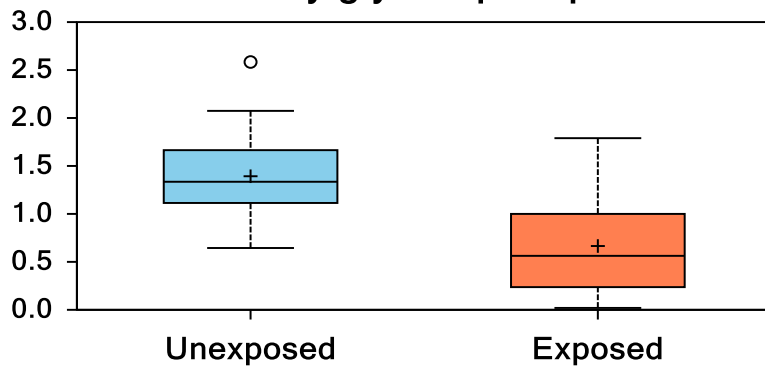

### 1-arachidoylglycerophosphocholine

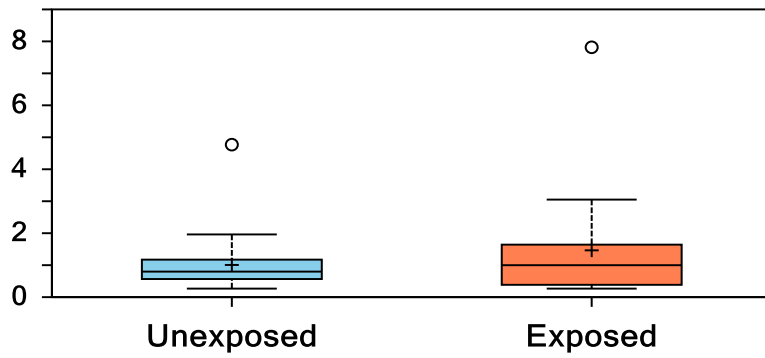

### 1-docosapentaenoylglycerophosphocholine

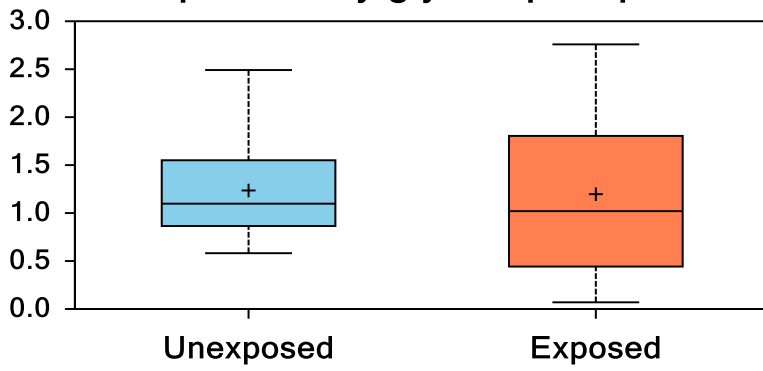

### 1-heptadecanoylglycerophosphocholine

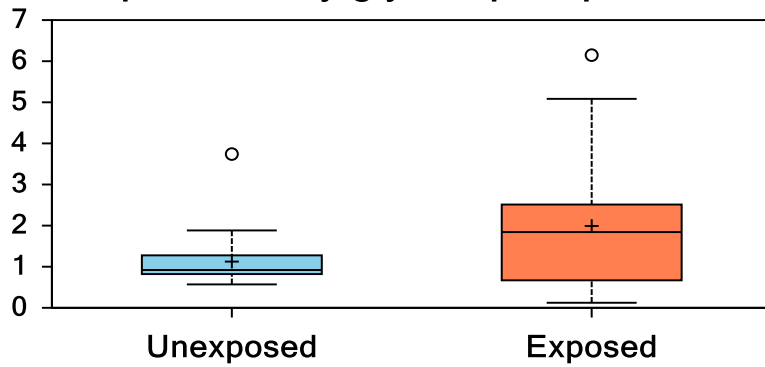

### 1-linoleoylglycerophosphocholine

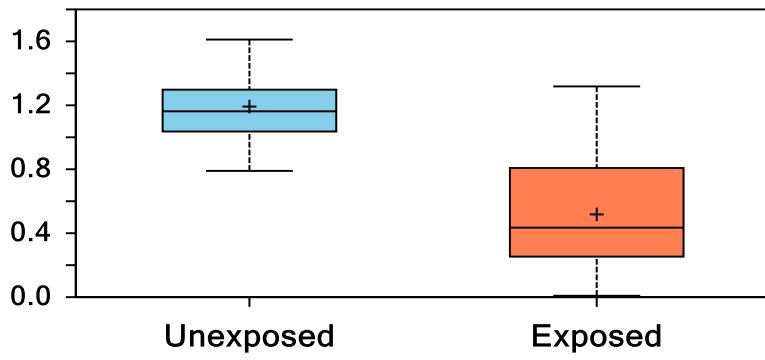

### 1-methylxanthine

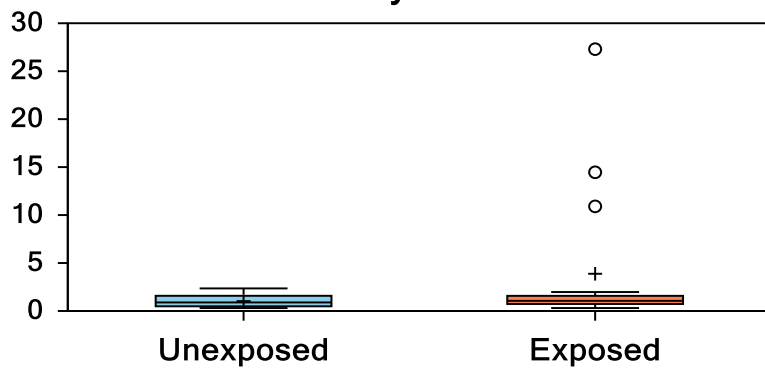

### 1-oleoylglycerol (1-monoolein)

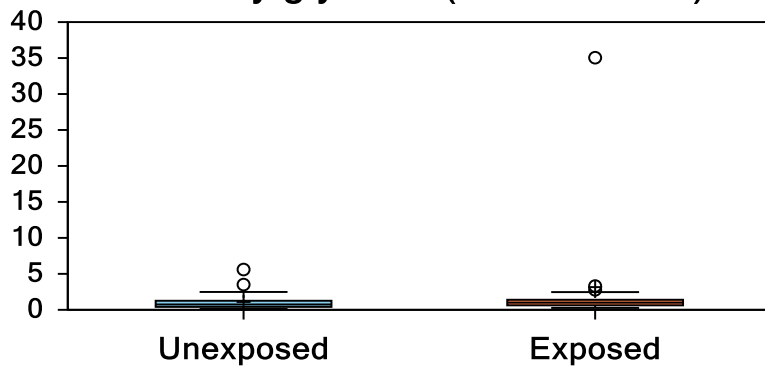

### 1-palmitoleoylglycerophosphocholine\*

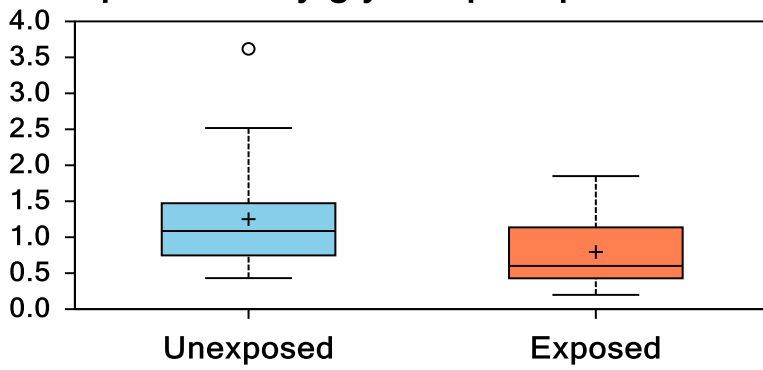

### 1-palmitoylglycerophosphoethanolamine

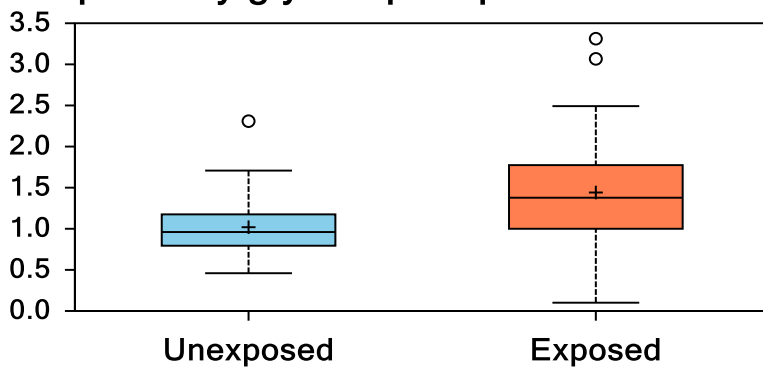

### 1-pentadecanoylglycerophosphocholine'

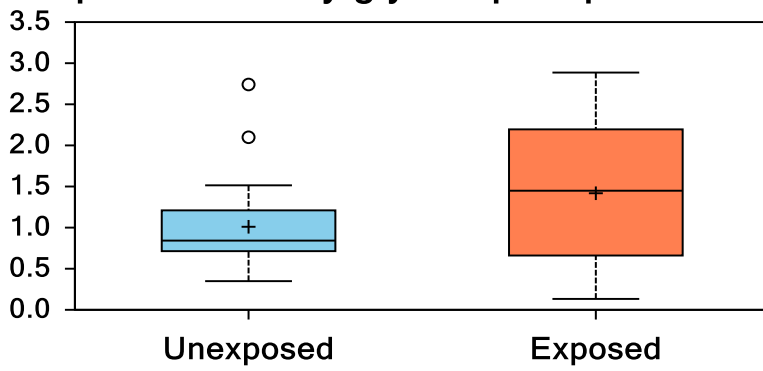

### 1-stearoylglycerophosphoethanolamine

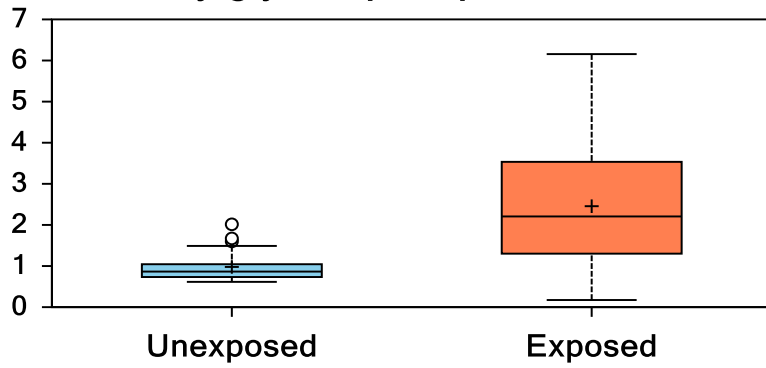

### 2,3-dihydroxyisovalerate

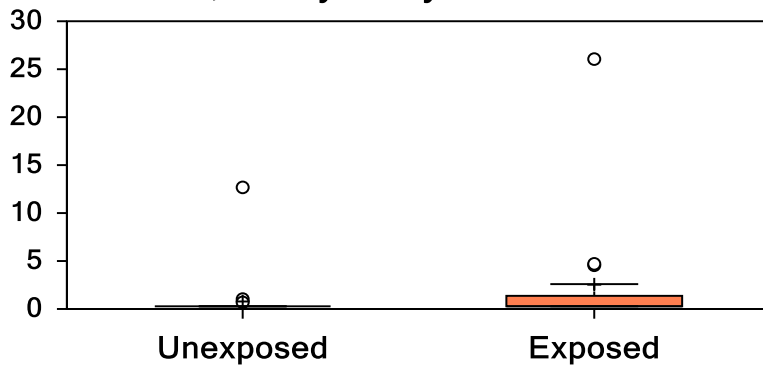

### 2-aminoadipate

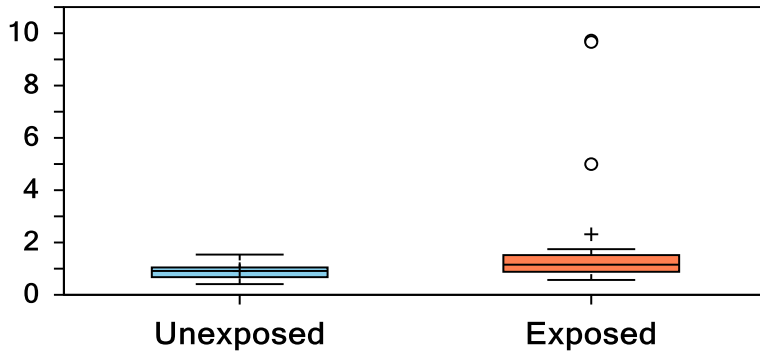

### 2-arachidonoylglycerophosphoethanolamir

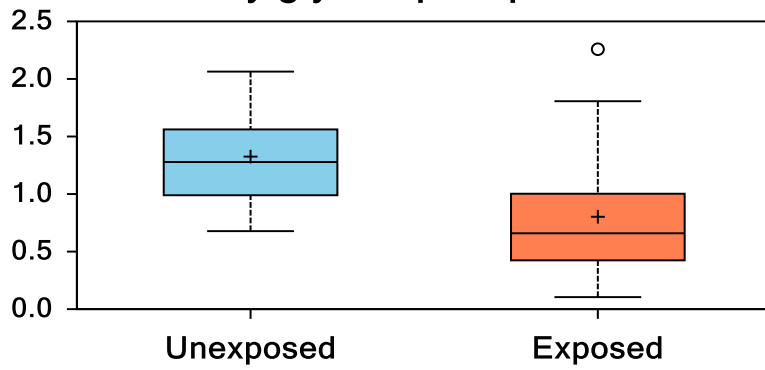

### 2-hydroxy-3-methylvalerate

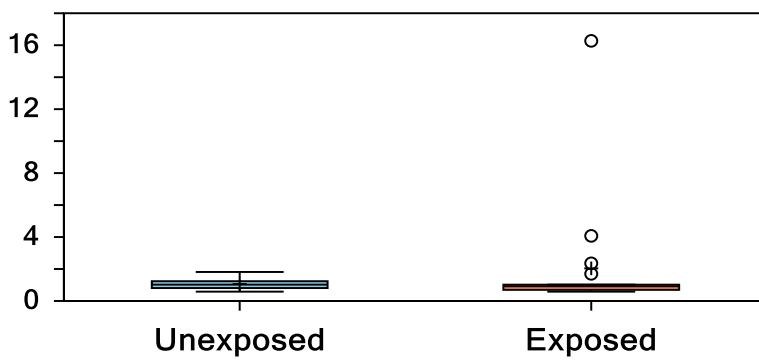

### 2-hydroxybutyrate (AHB)

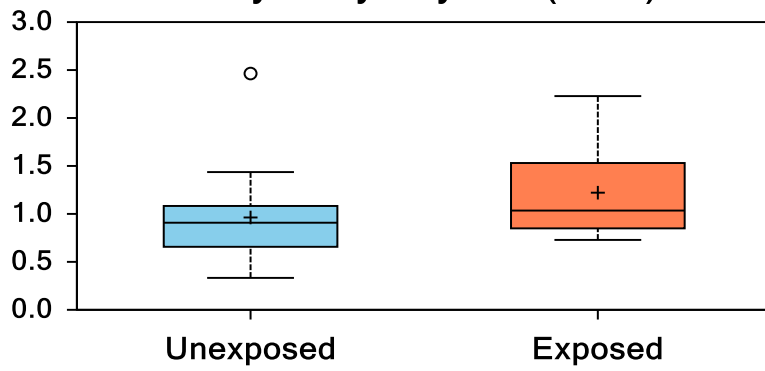



### 2-hydroxyisobutyrate

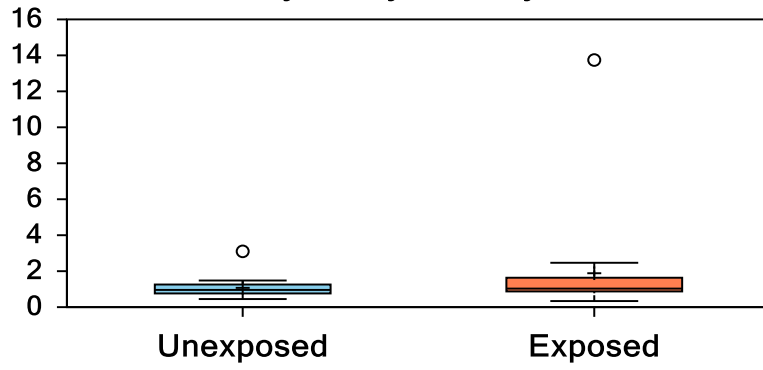

### 2-hydroxypalmitate

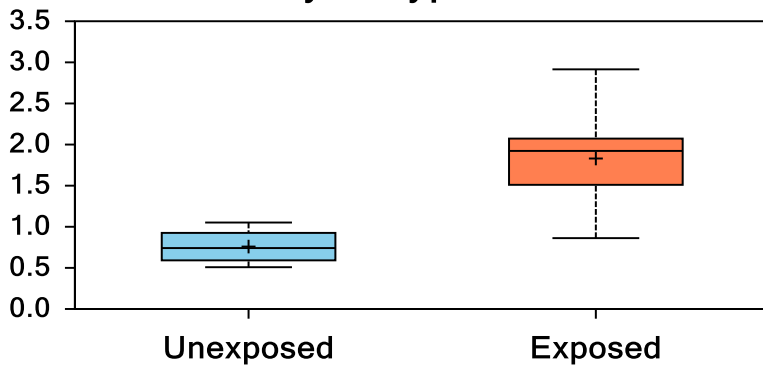

### 2-linoleoylglycerophosphoethanolamine

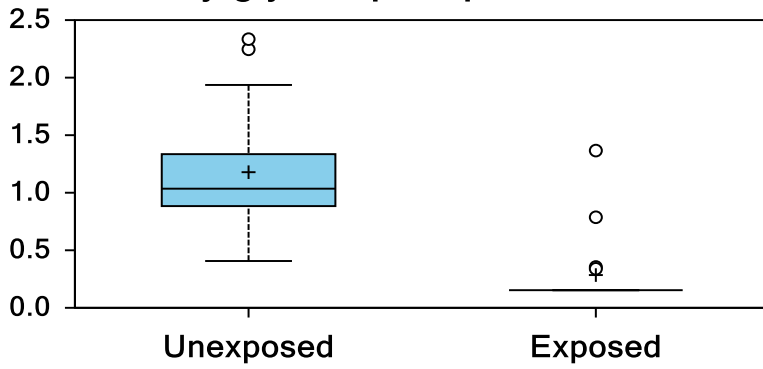

### 2-methylcitrate

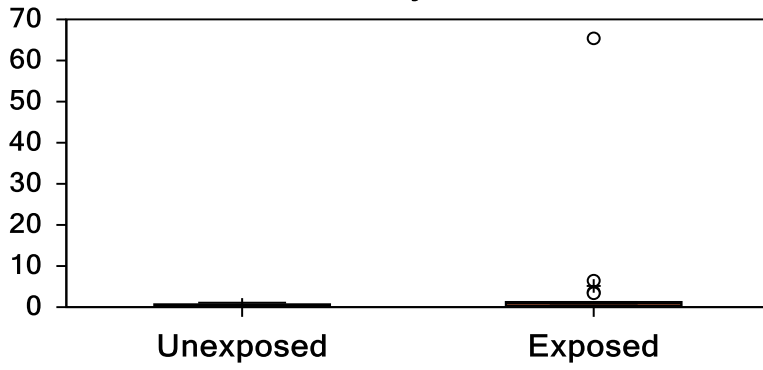

### 2-oleoylglycerophosphocholine\*

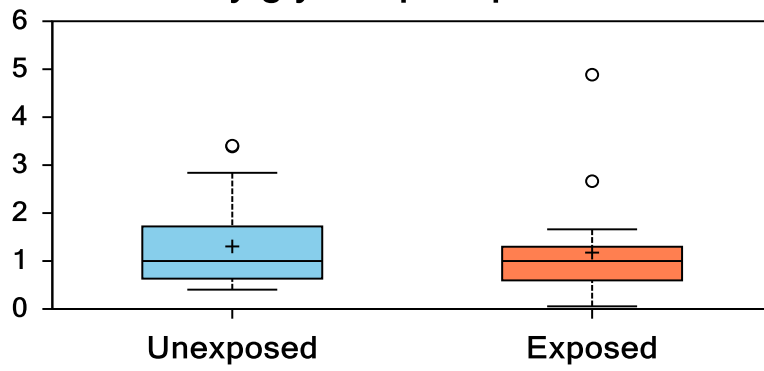

### 2-oxindole-3-acetate

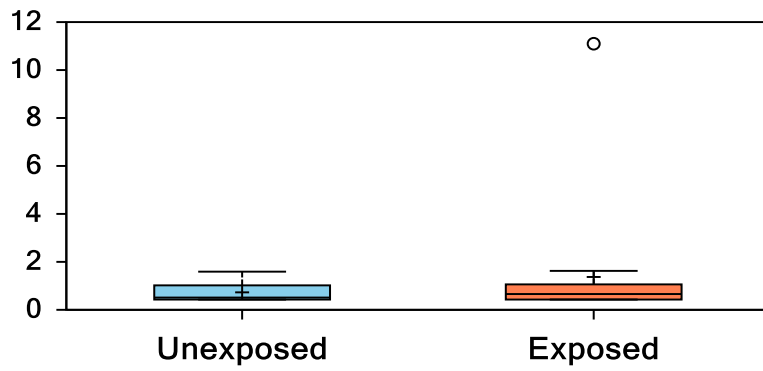

### 2-palmitoylglycerophosphoethanolamine

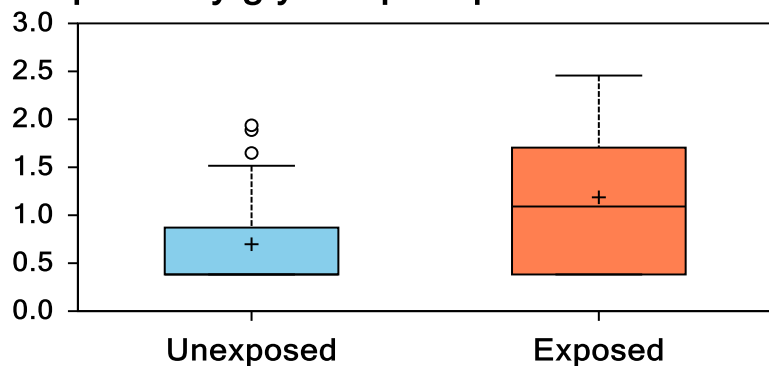

### 3-(4-hydroxyphenyl)lactate

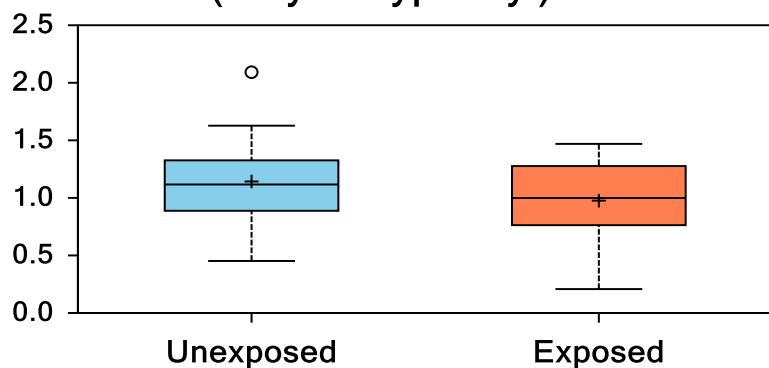

### 7-carboxy-4-methyl-5-propyl-2-furanpropanoate

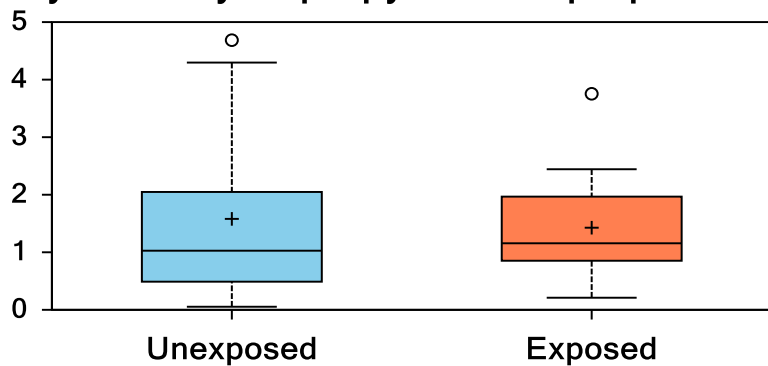

**3-hydroxy-2-ethylpropionate**

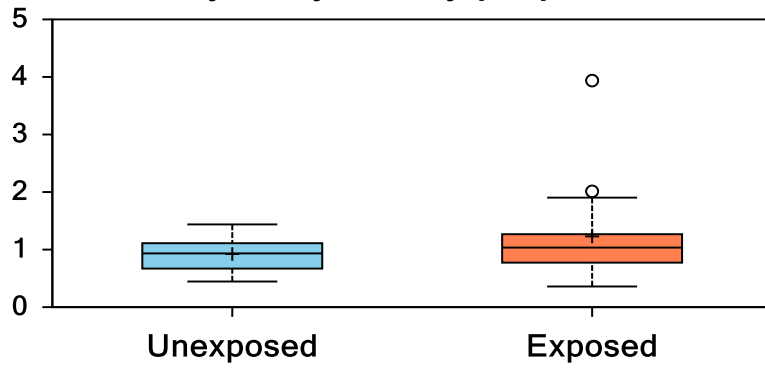

**3-hydroxydecanoate**

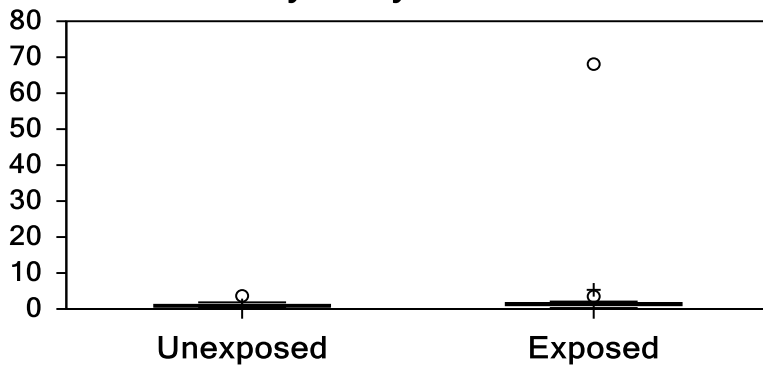

**3-hydroxykynurenine**

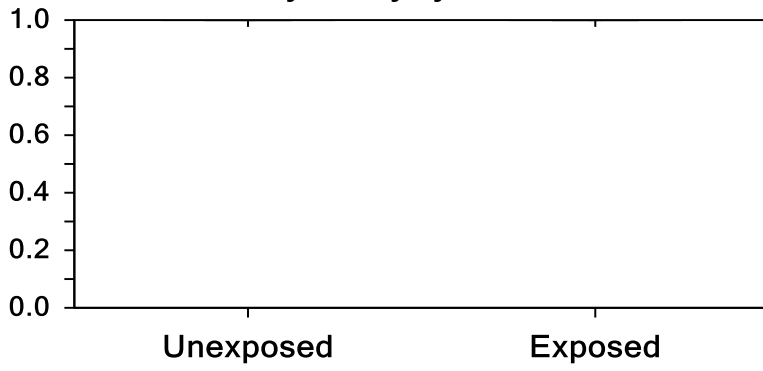

3-indoxyl sulfate

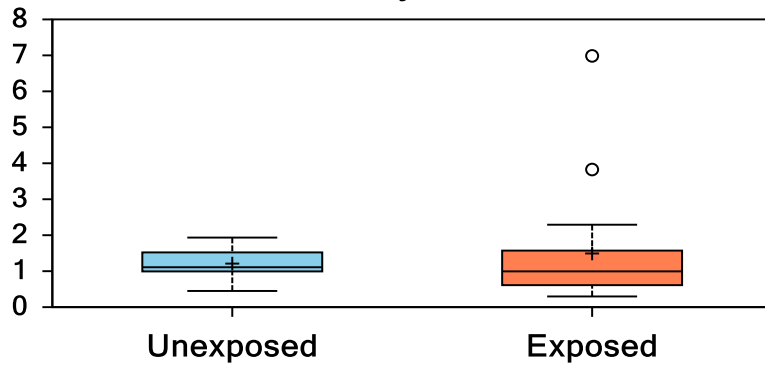

3-methyl-2-oxovalerate

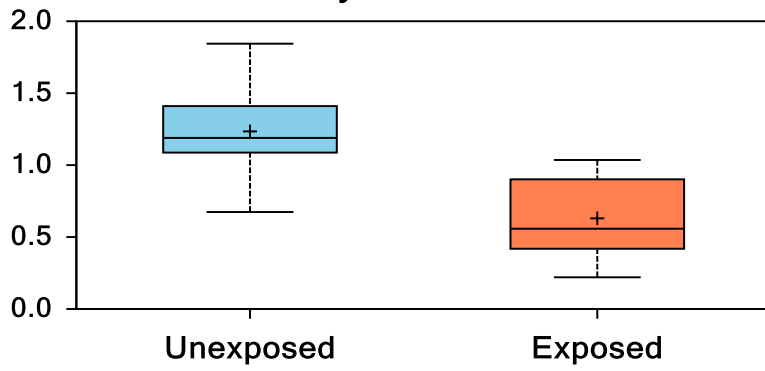

3-methylthiopropionate

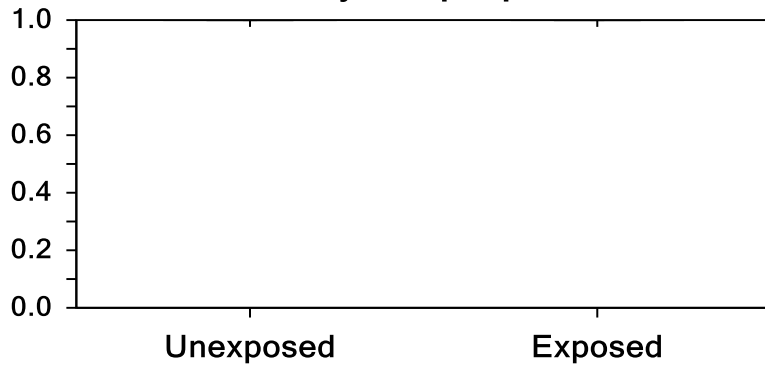

### 4-acetamidobutanoate

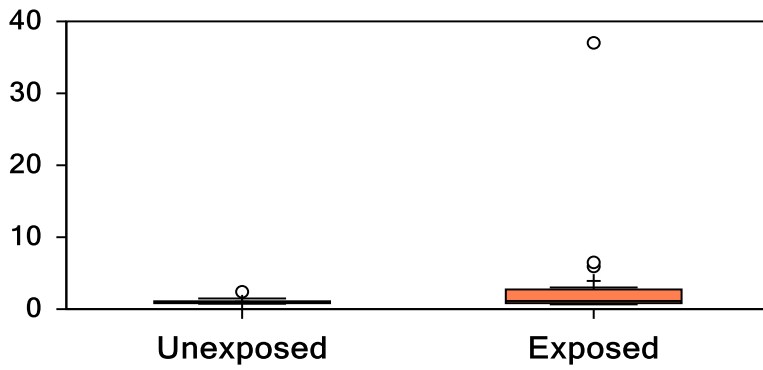

### 4-acetylphenol sulfate

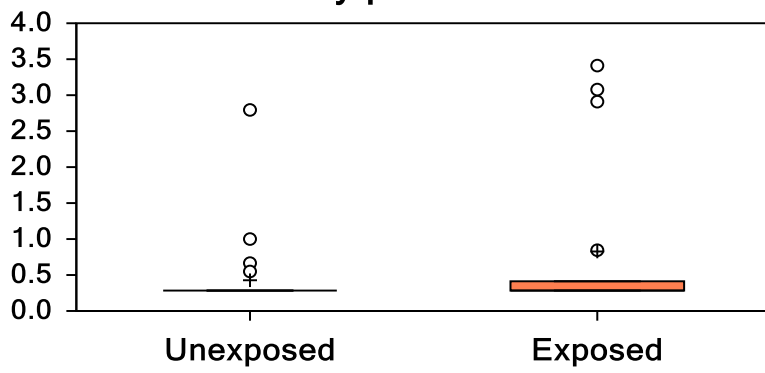

### 4-ethylphenylsulfate

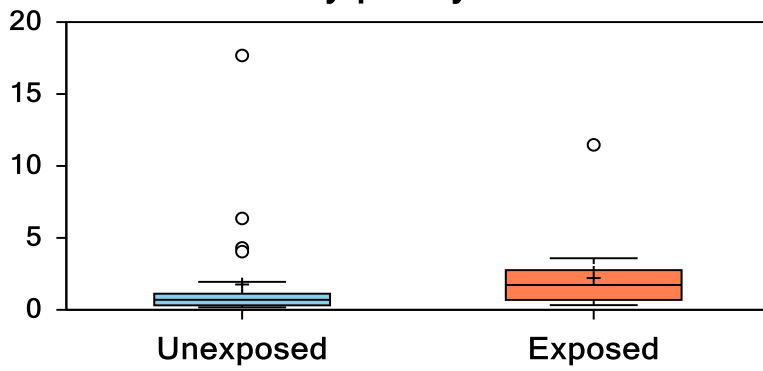

### 4-hydroxybutyrate (GHB)

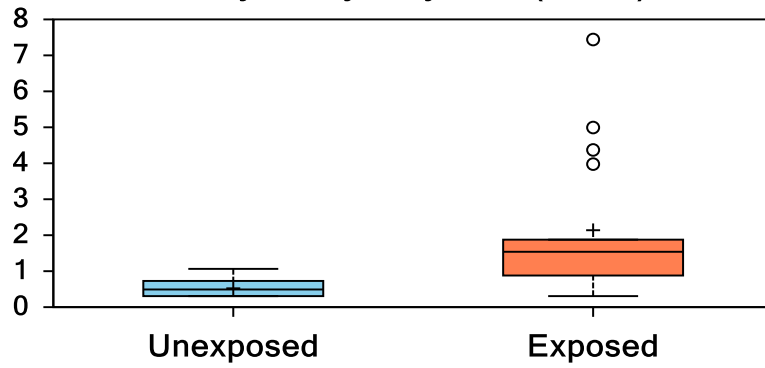

### 4-hydroxyphenylacetate

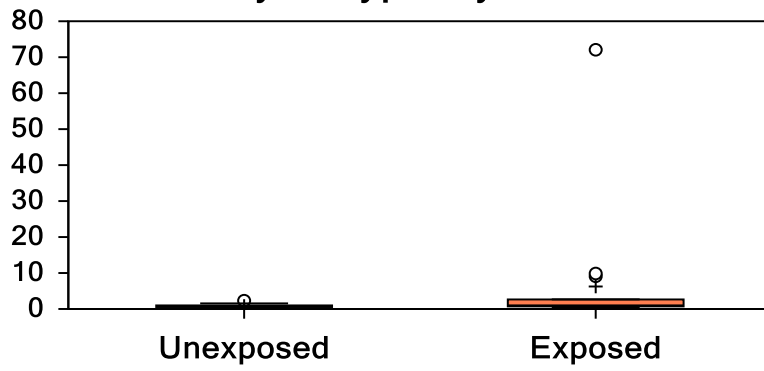

### 4-methyl-2-oxopentanoate

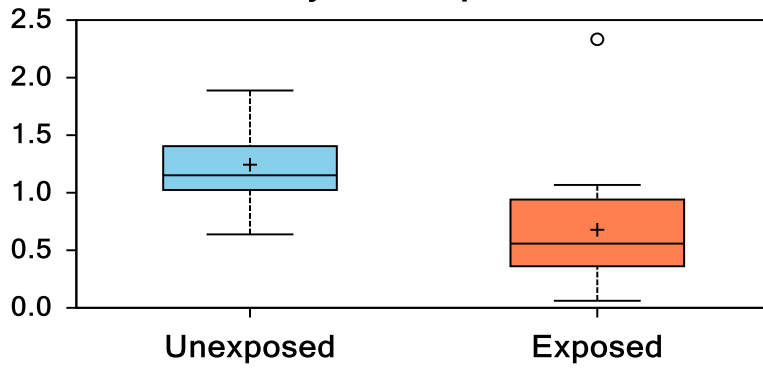

5-acetylamino-6-amino-3-methyluracil ;

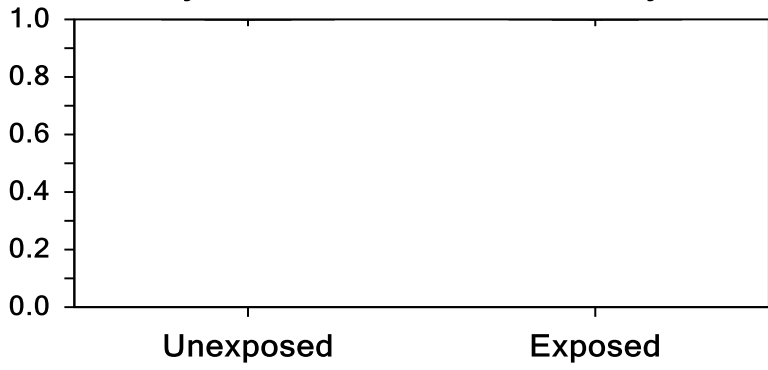

5alpha-androstan-3beta,17alpha-diol disulfate

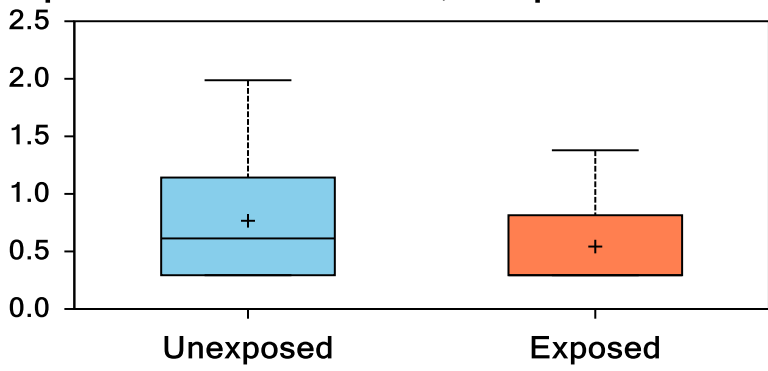

alpha-pregnan-3beta,20alpha-diol monosulfate

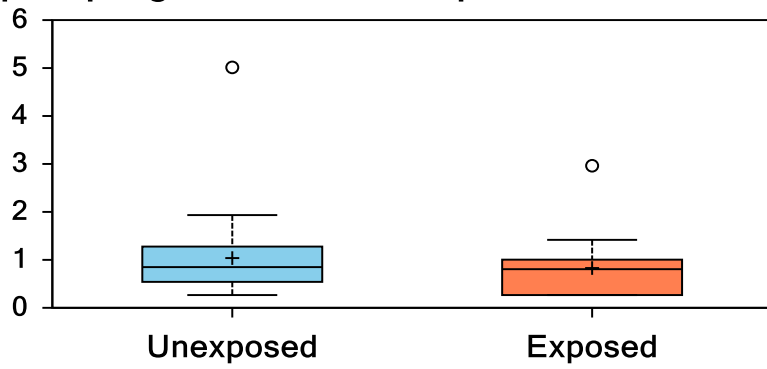



### 5-HEPE

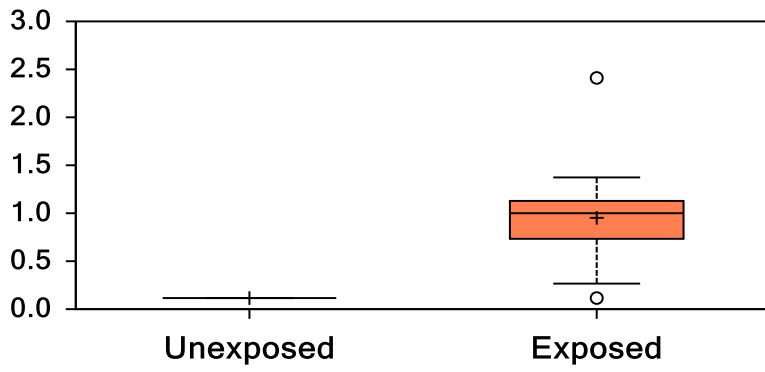

### 5-methylthioadenosine (MTA)

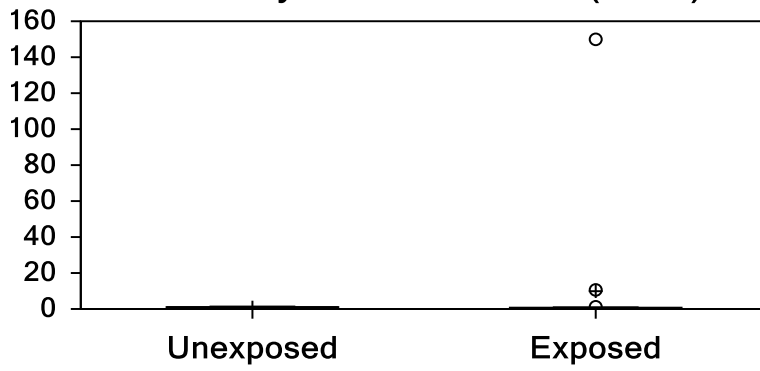

### 6'-sialyllactose

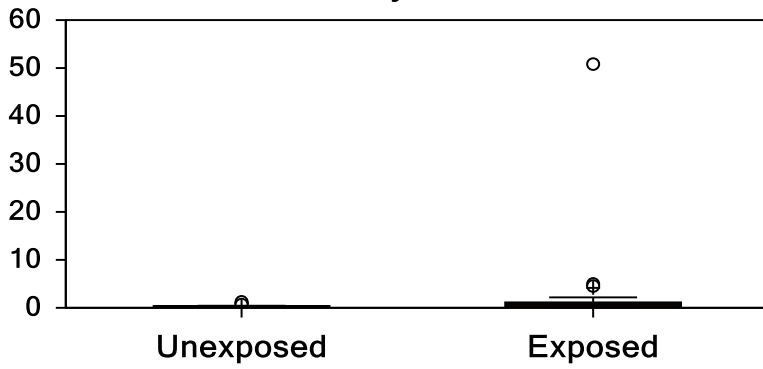

:

### 7-beta-hydroxycholesterol

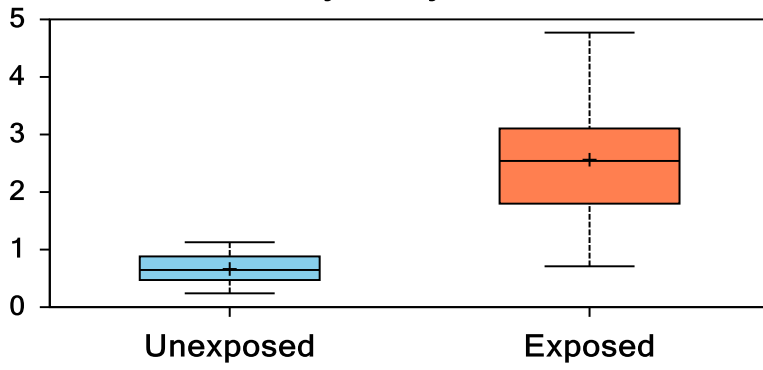

### 7-methylguanine

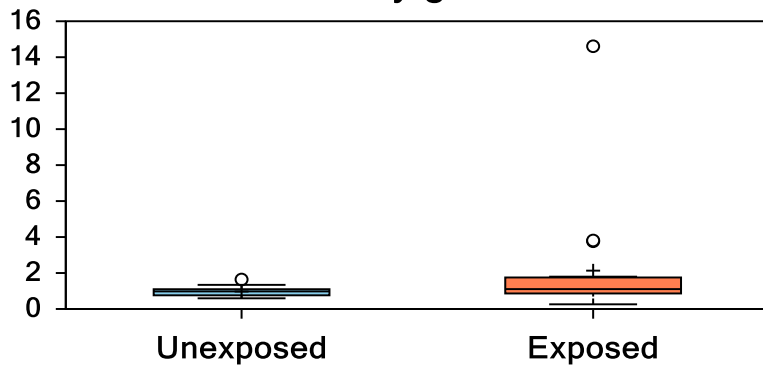

### 9-HETE

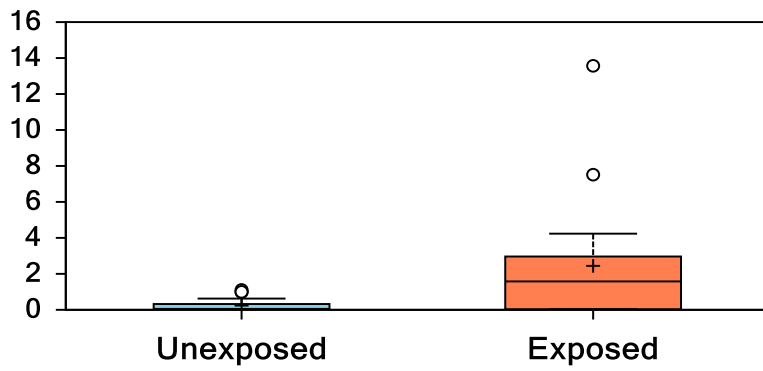

**adenosine**

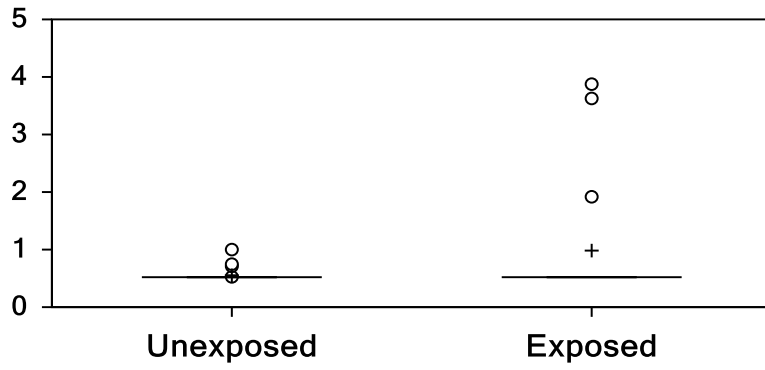

**adipate**

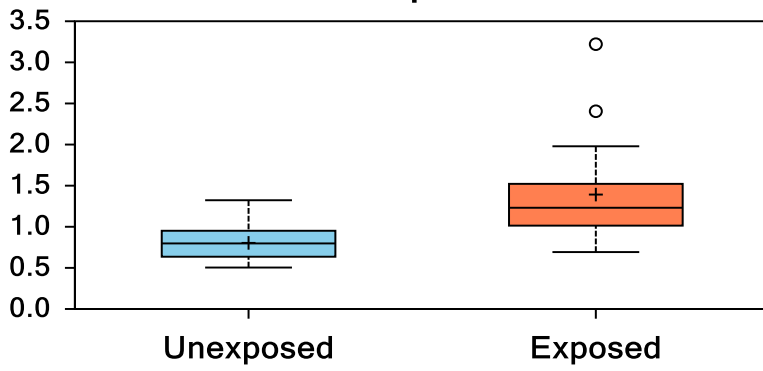

**ADSGEGDFXAEGGGVR\***

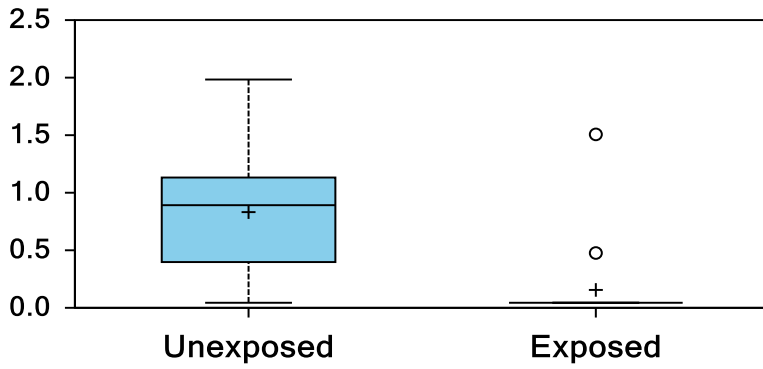

### alanylarginine

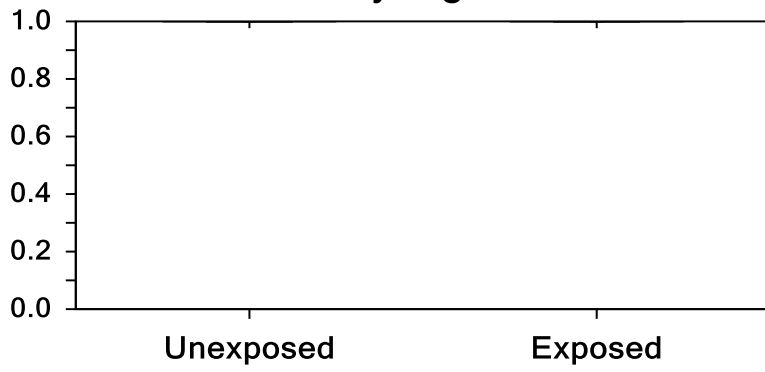

### alpha-glutamylglutamate

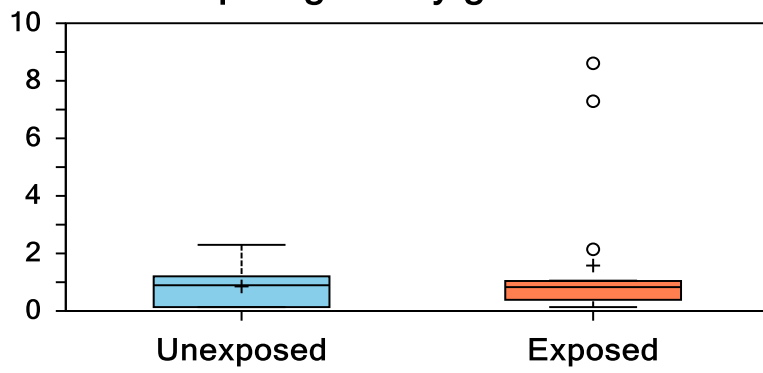

### alpha-hydroxyisocaproate

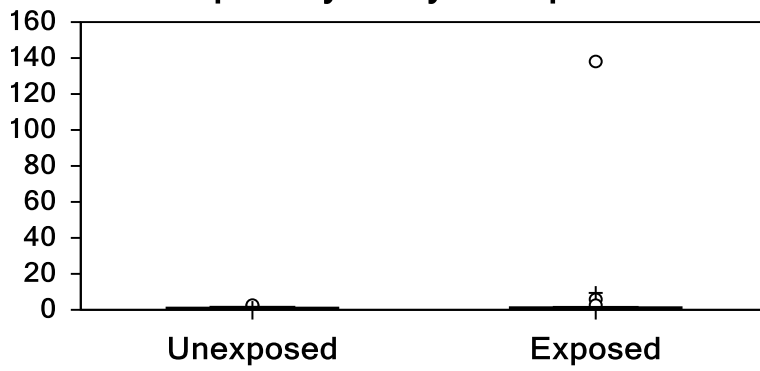

**alpha-ketoglutarate**

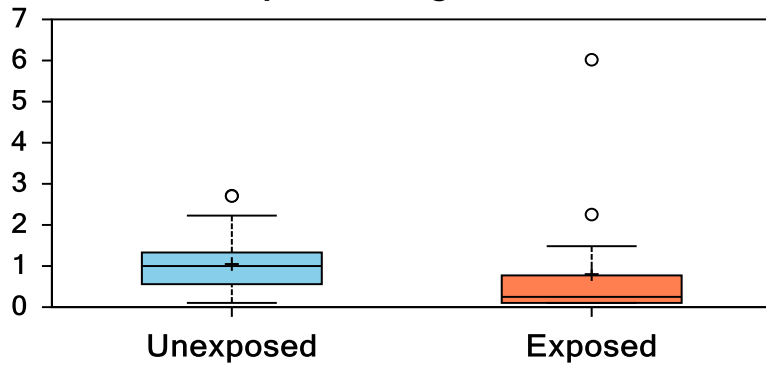

**arabinose**

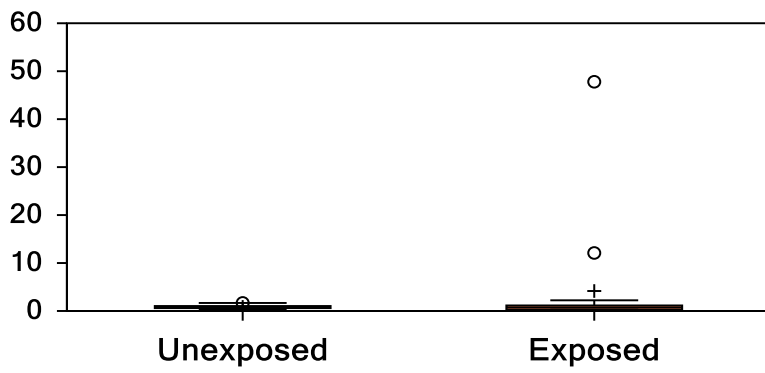

**arachidonate (20:4n6)**

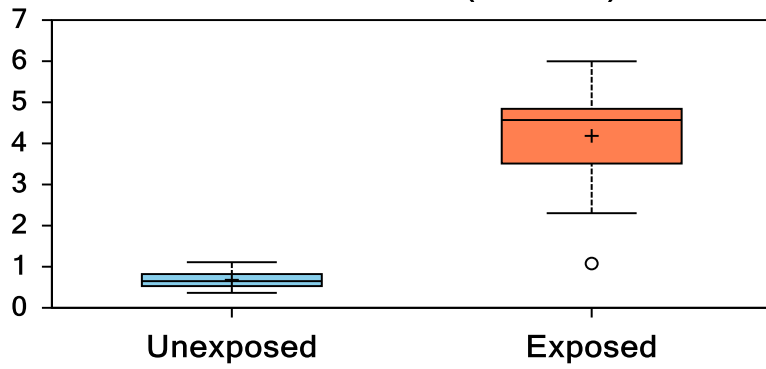

ascorbate (Vitamin C)

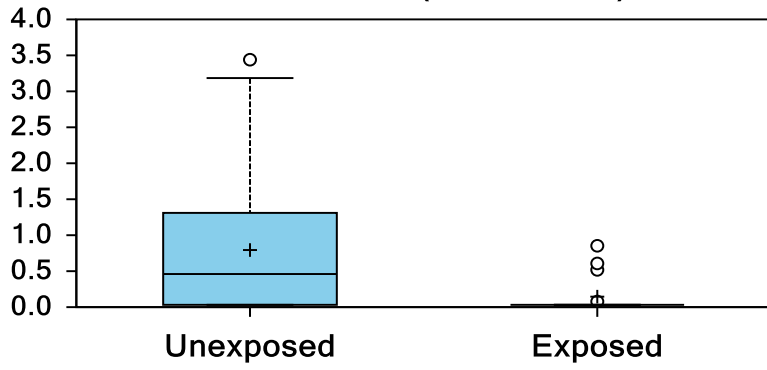

aspartate

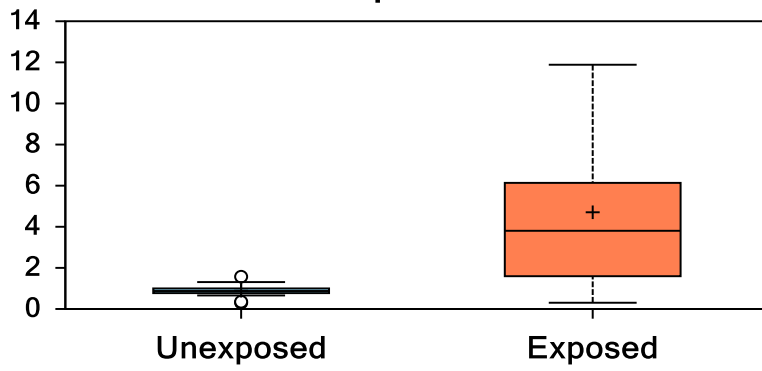

azelate (nonanedioate)

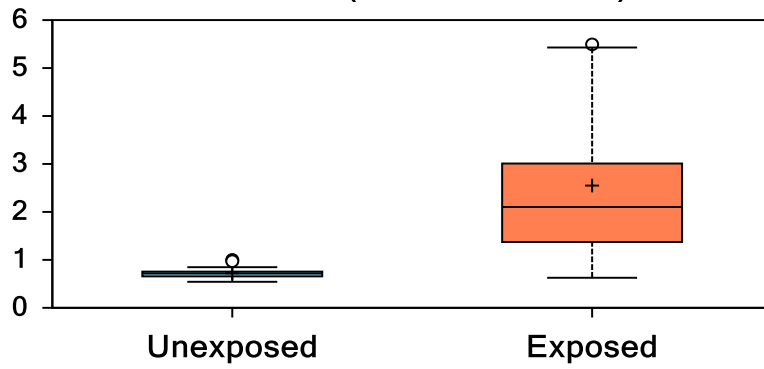

**beta-alanine**

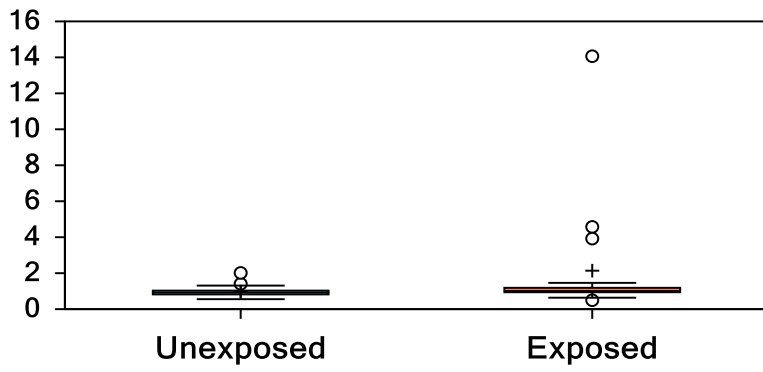

**betaine**

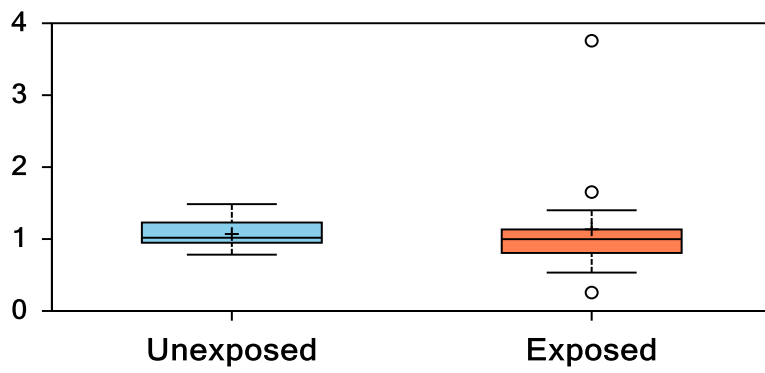

**bilirubin (E,Z or Z,E)\***

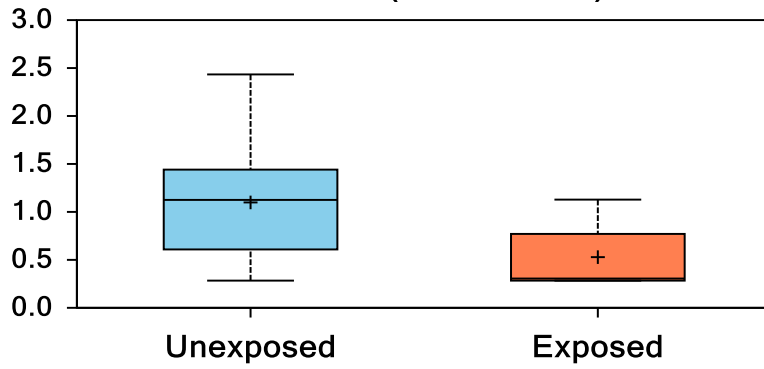

**bradykinin**

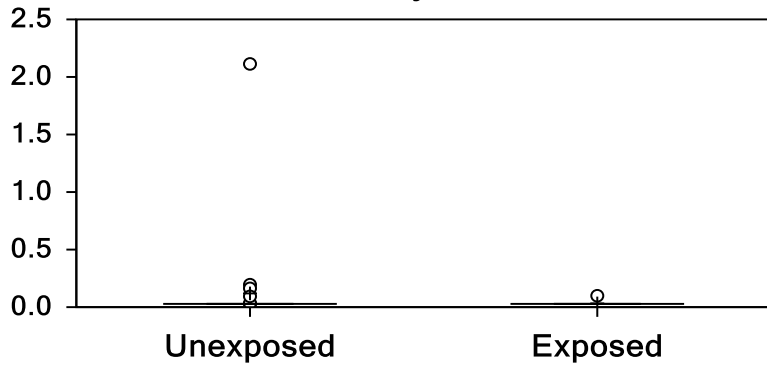

**butyrylcarnitine**

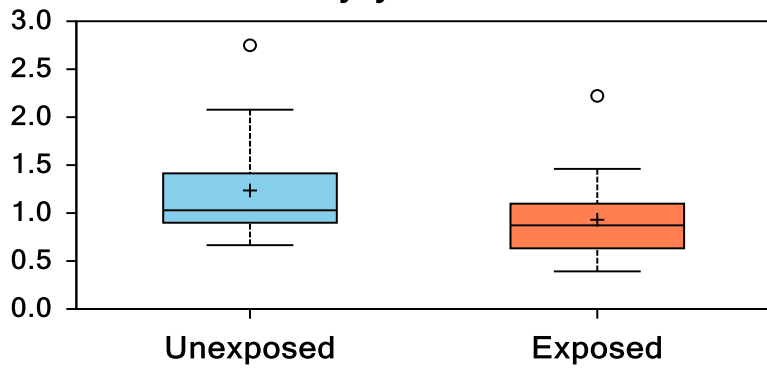

**caprate (10:0)**

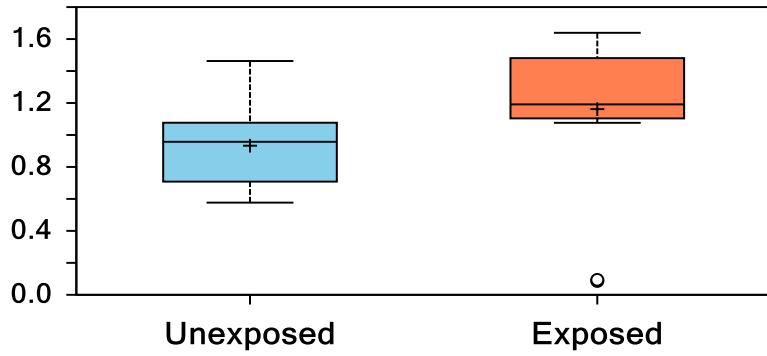



### carnitine

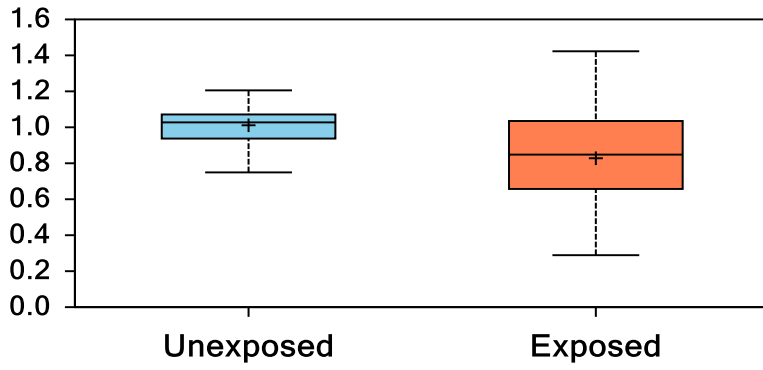

### chiro-inositol

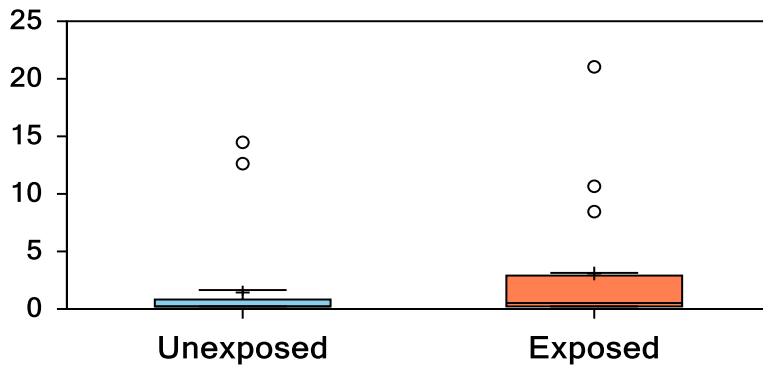

### choline

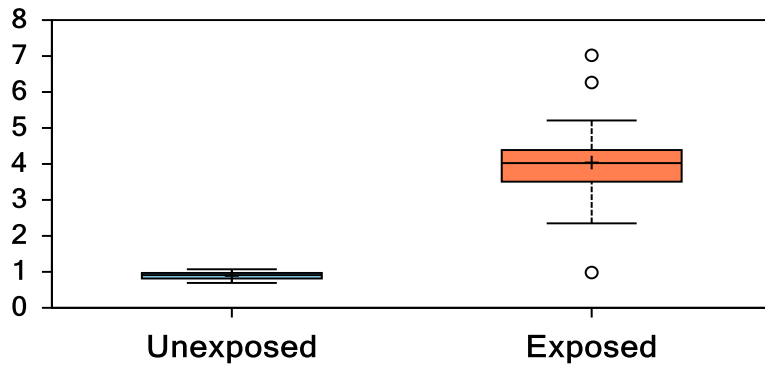

**cis-4-decenoyl carnitine**

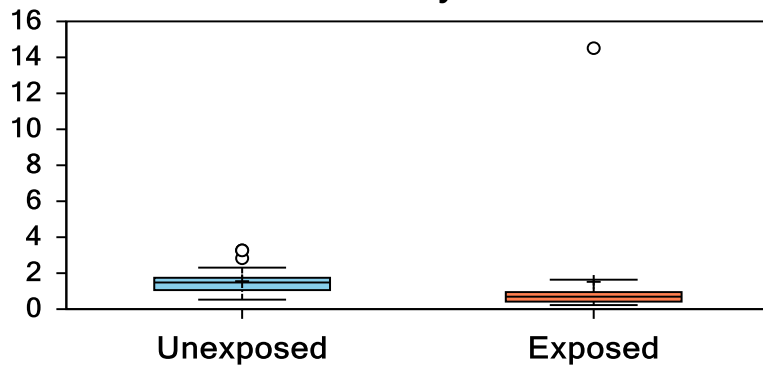

**citalopram**

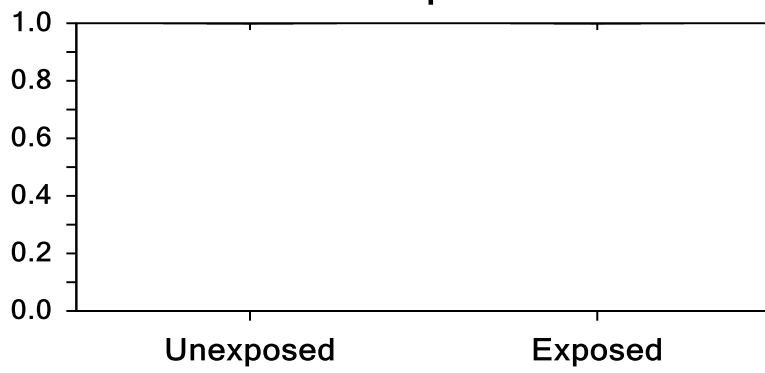

**citrulline**

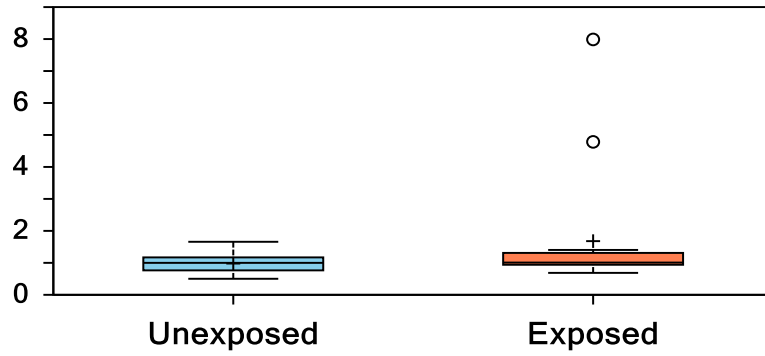

**cortisone**

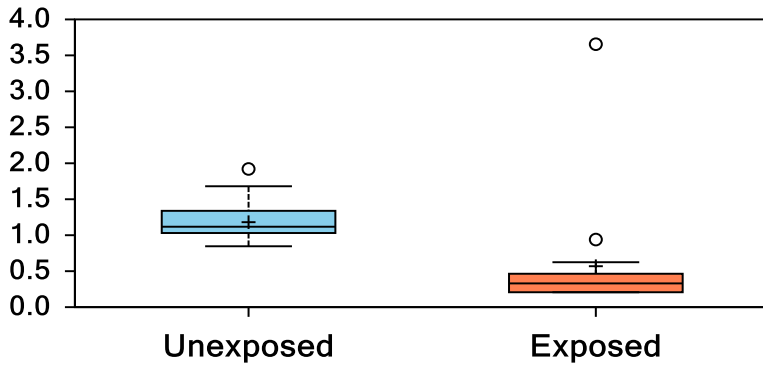

**creatine**

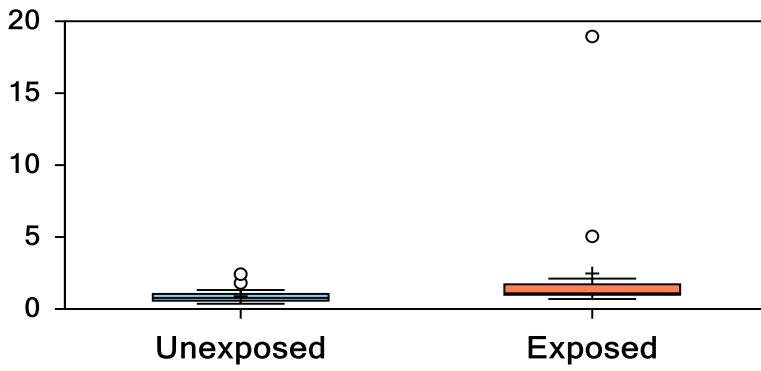

**cyclo(gly-glu)**

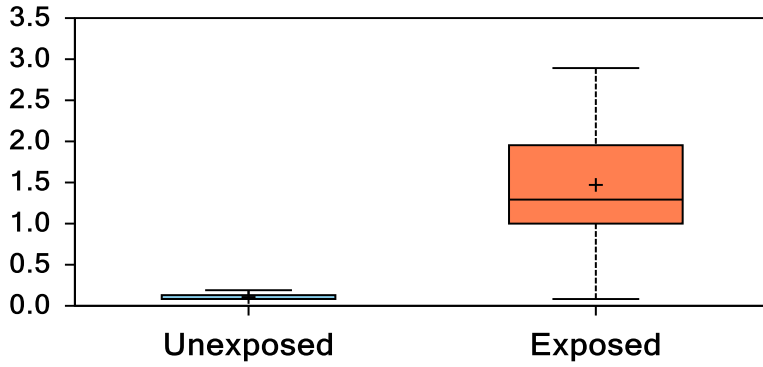

### cysteine

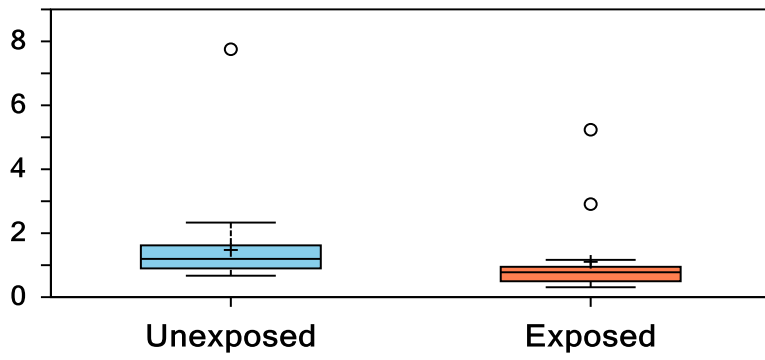

### dehydroisoandrosterone sulfate (DHEA-S)

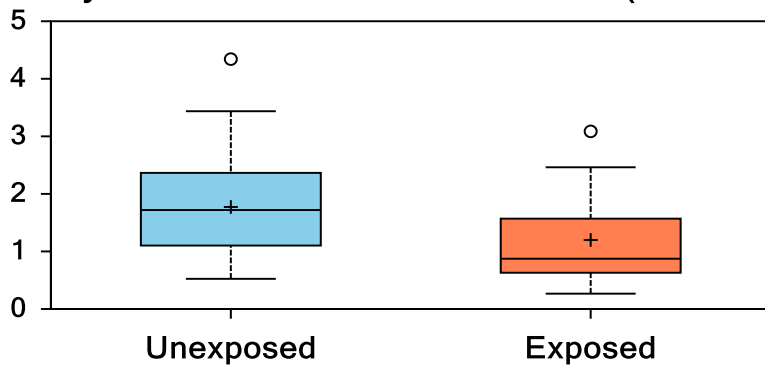

### desmethylnaproxen sulfate\*

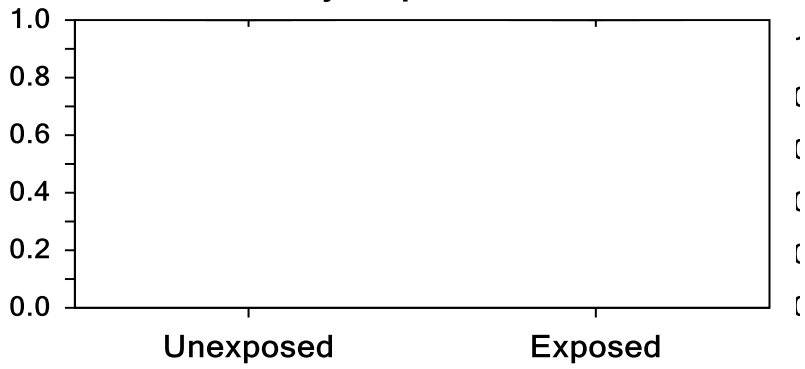

dihomo-linolenate (20:3n3 or n6)

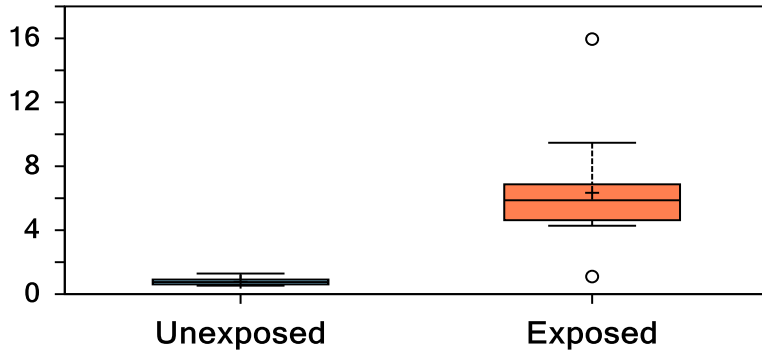

dimethylglycine

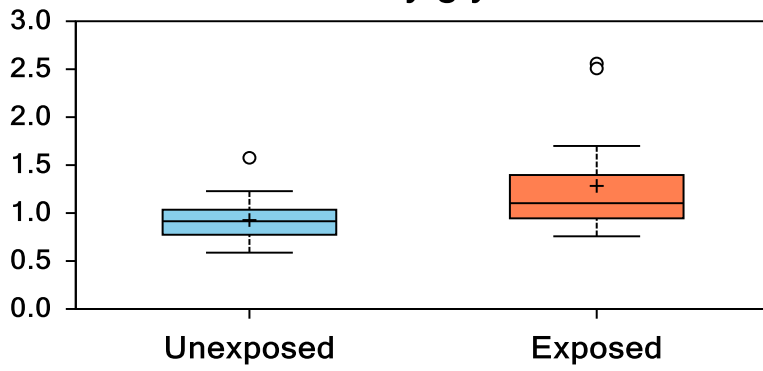

docosahexaenoate (DHA; 22:6n3)

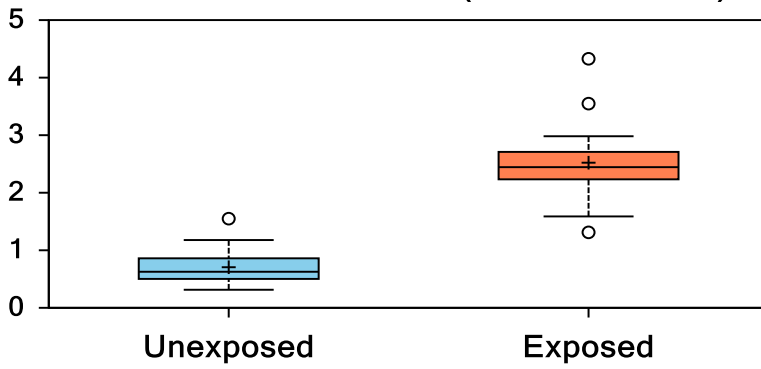

### dodecanedioate

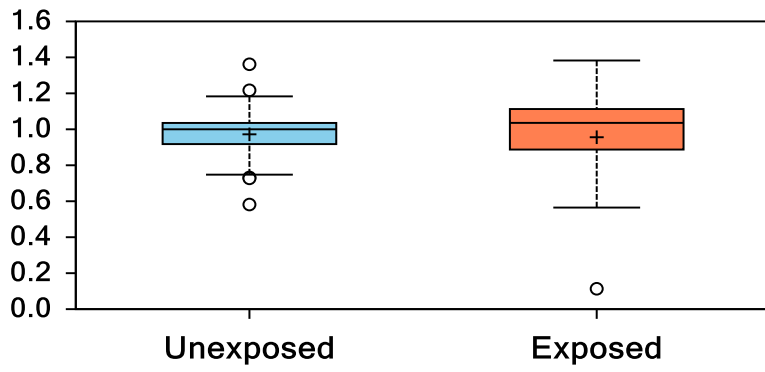

### EDTA

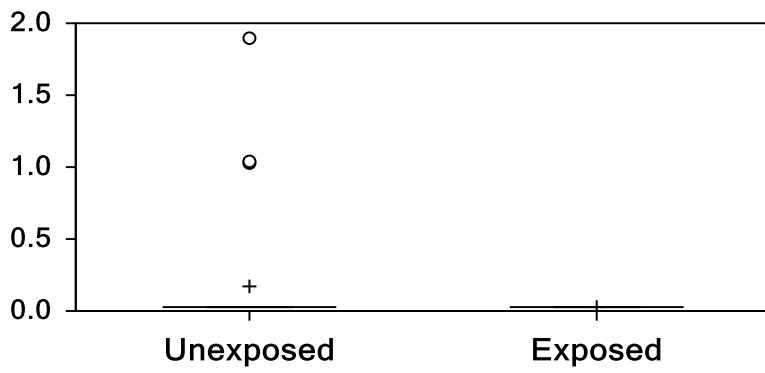

### epiandrosterone sulfate

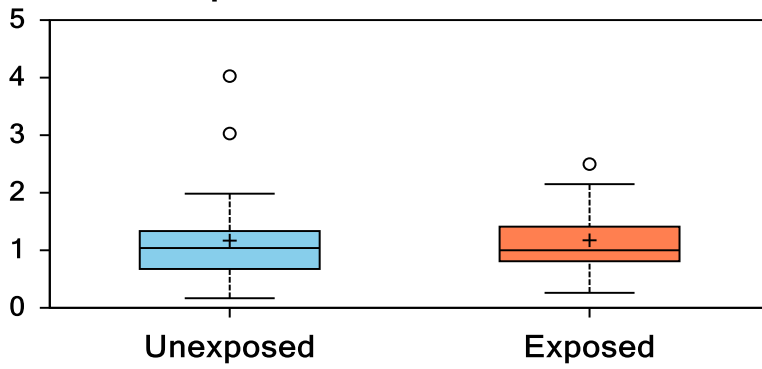

erythronate\*

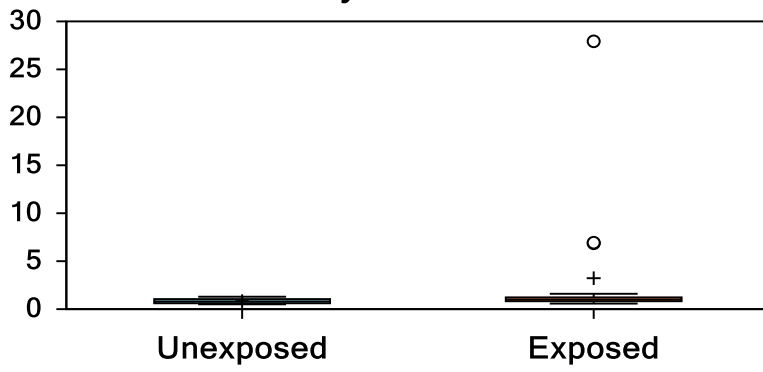

fructose

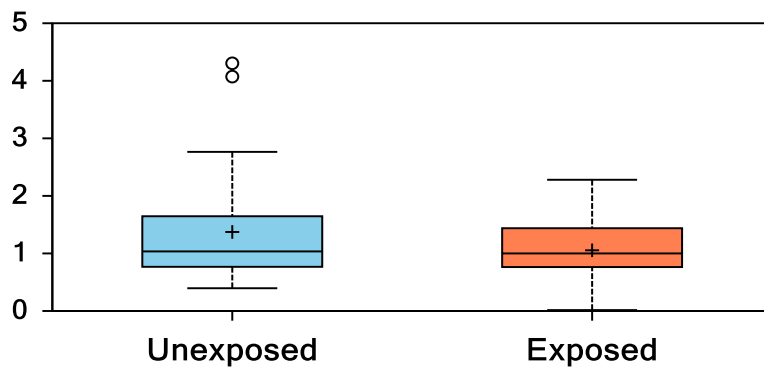

gamma-aminobutyrate (GABA)

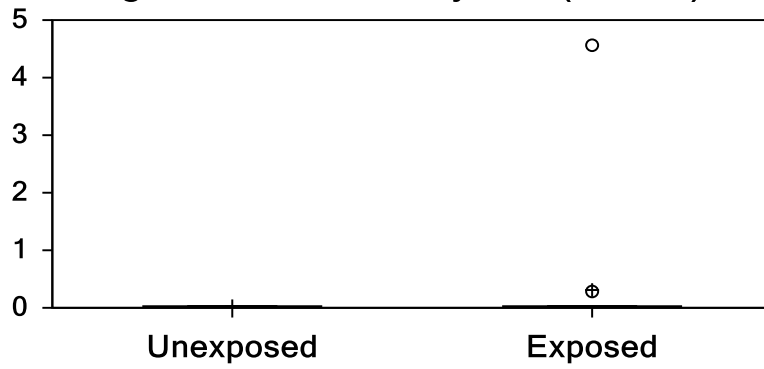

**gamma-glutamylglutamate**

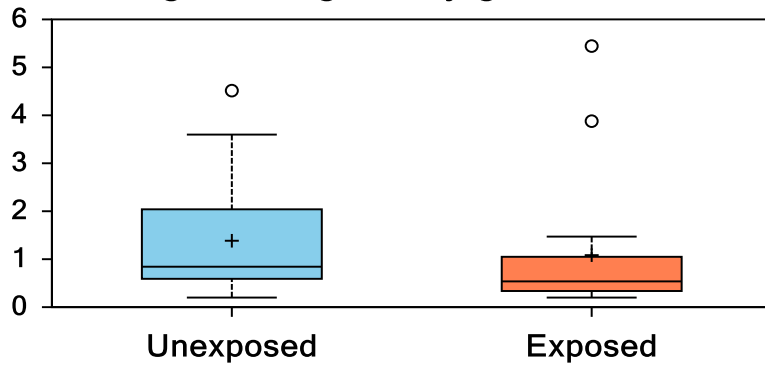

**gamma-glutamylleucine**

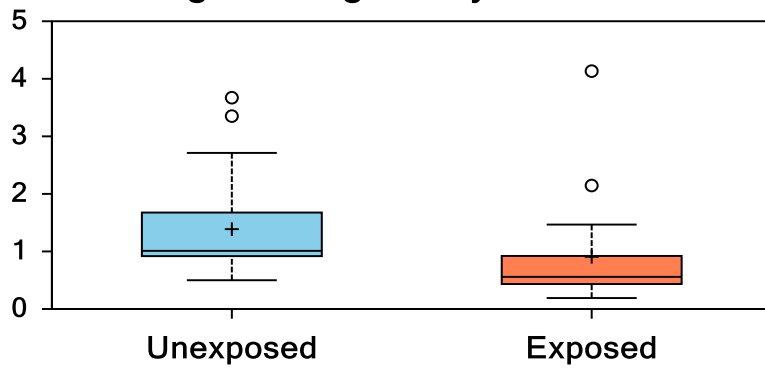

**gamma-glutamylthreonine\***

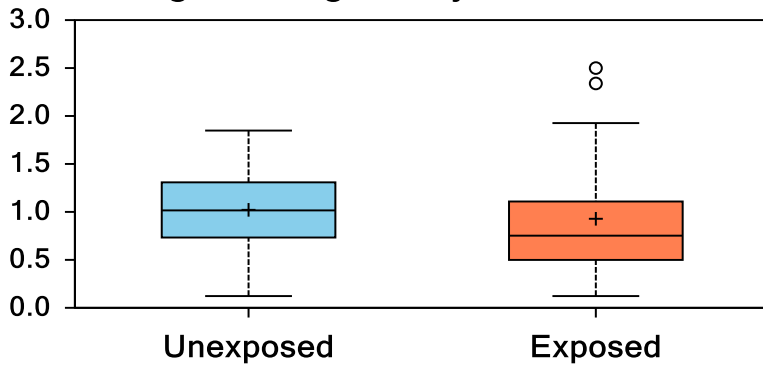



### gamma-glutamylvaline

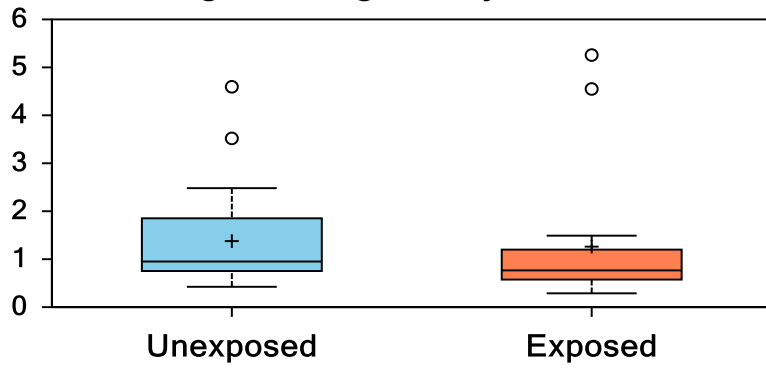

### glucarate (saccharate)

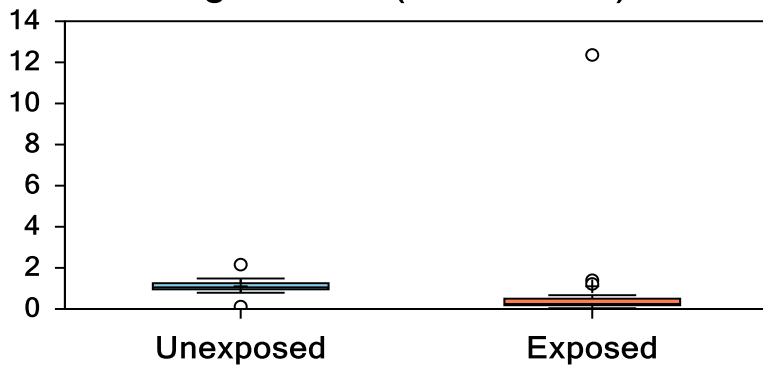

### glucuronate

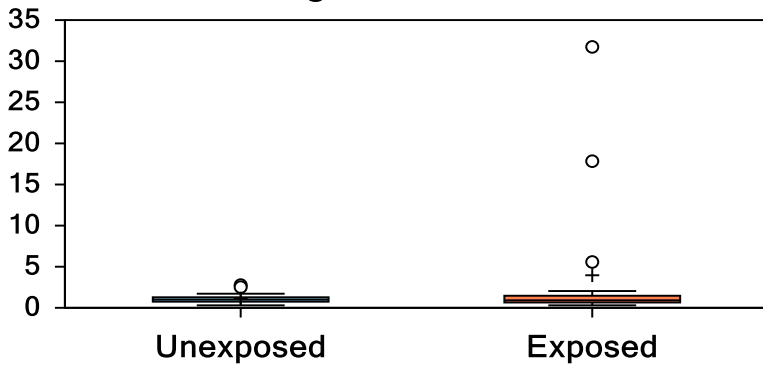

glutaroyl carnitine

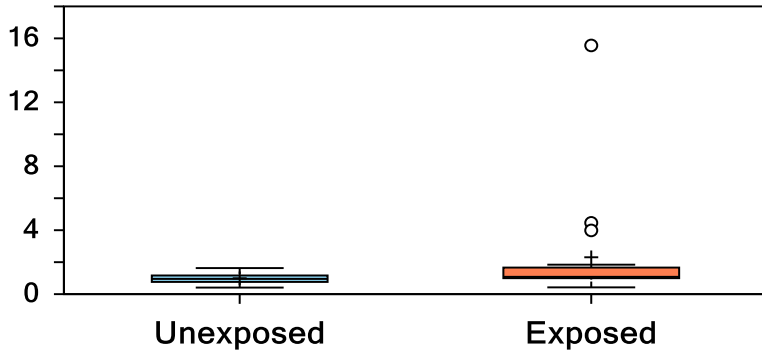

glycerol

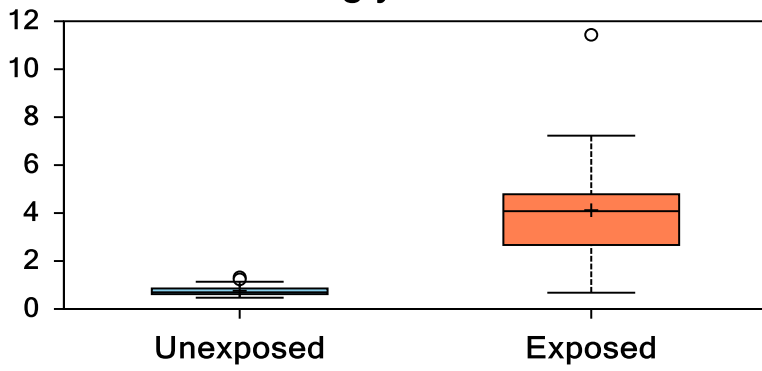

glycerophosphorylcholine (GPC)

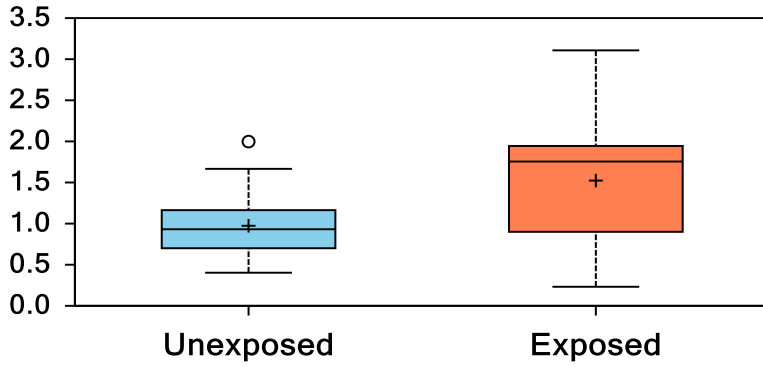

### glycocholate

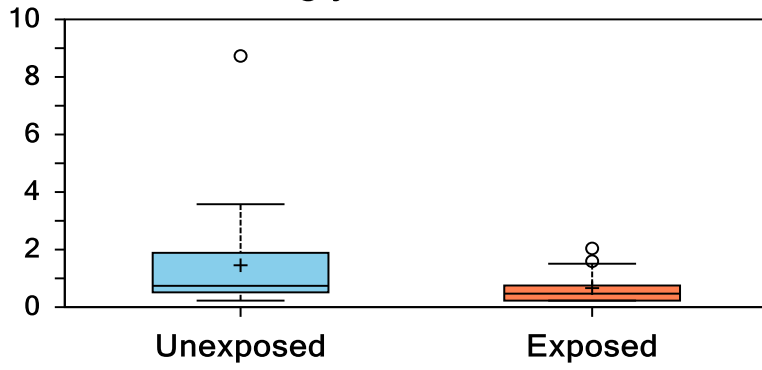

### glycolate (hydroxyacetate)

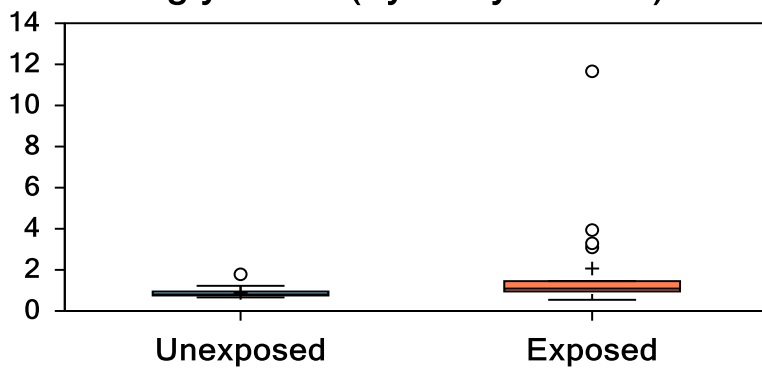

### glycylleucine

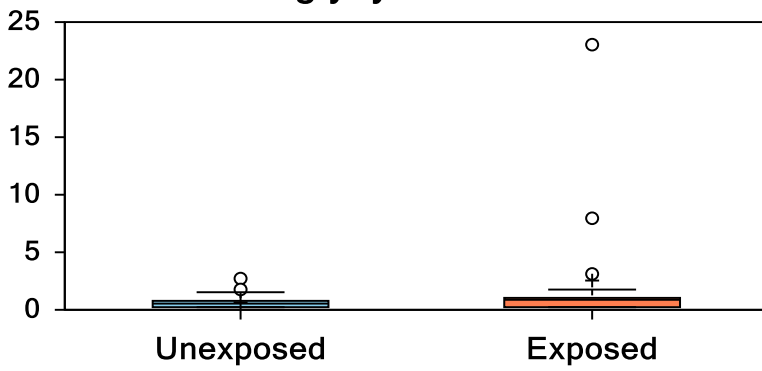

### glycyltryptophan

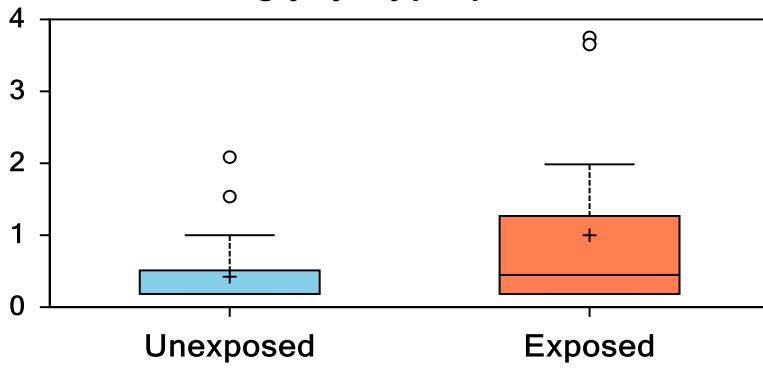

### gulono-1,4-lactone

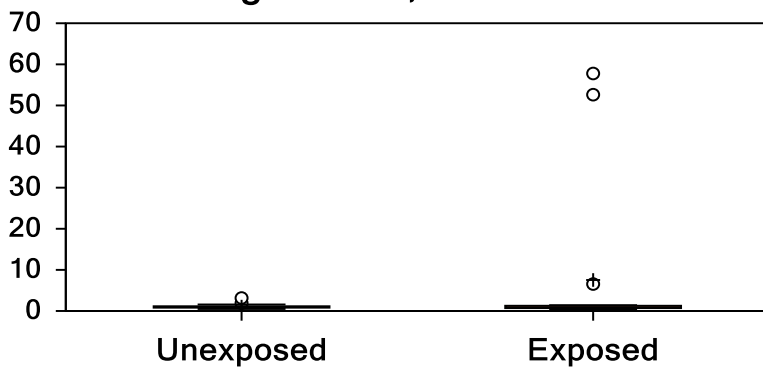

### hexadecanedioate

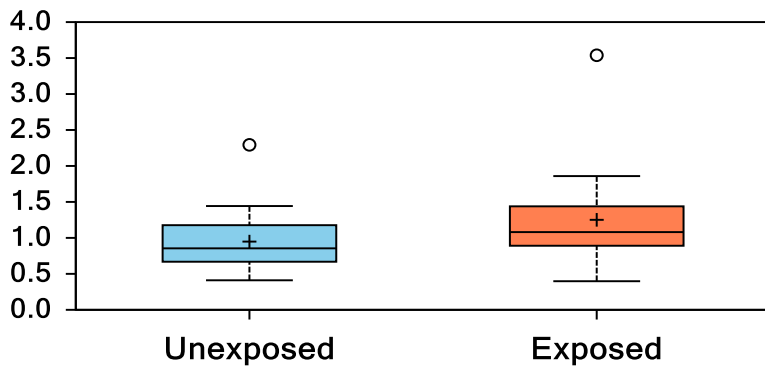

### hippurate

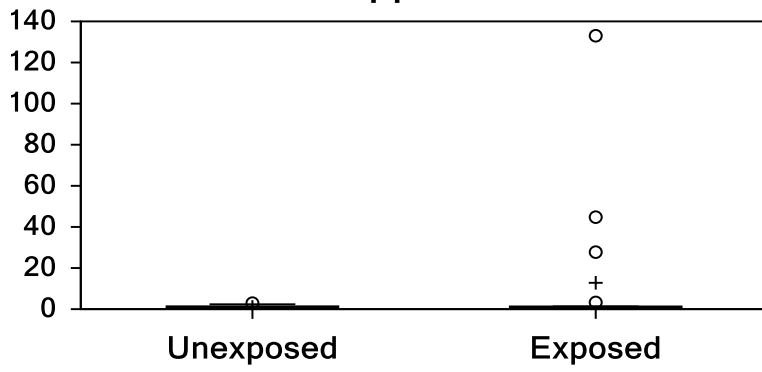

### homocitrulline

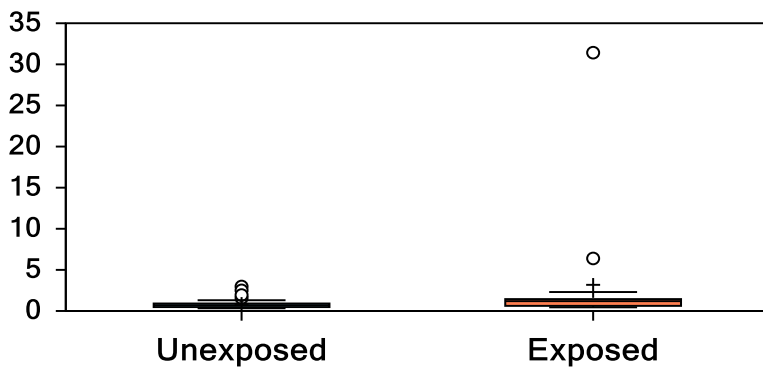

### homoserine

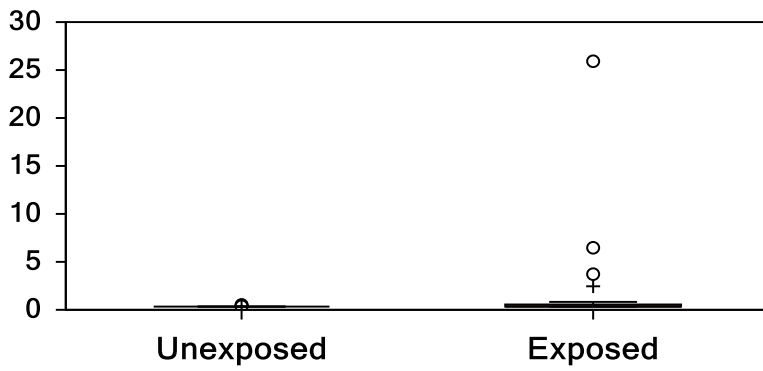

### HWESASXX\*

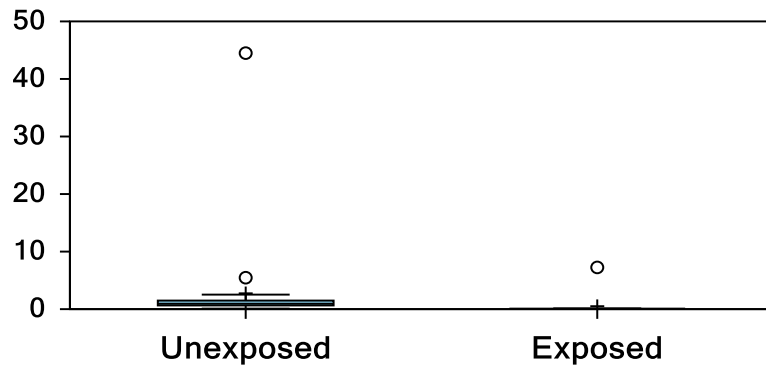

### hydrochlorothiazide

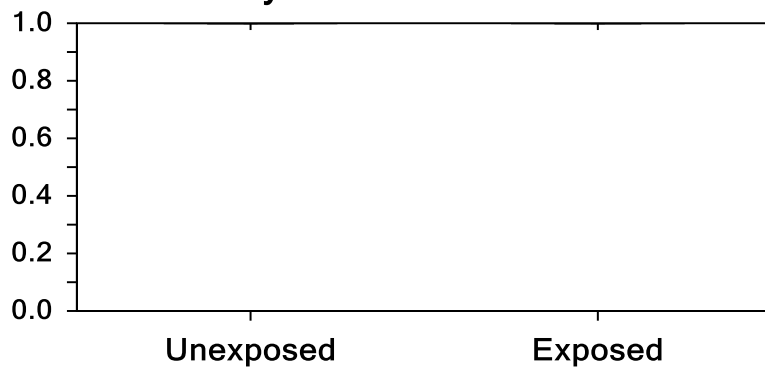

### hydroxyisovaleroyl carnitine

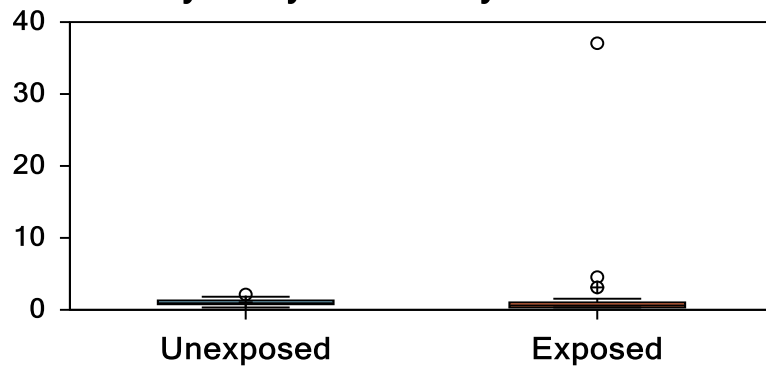

### imidazole lactate

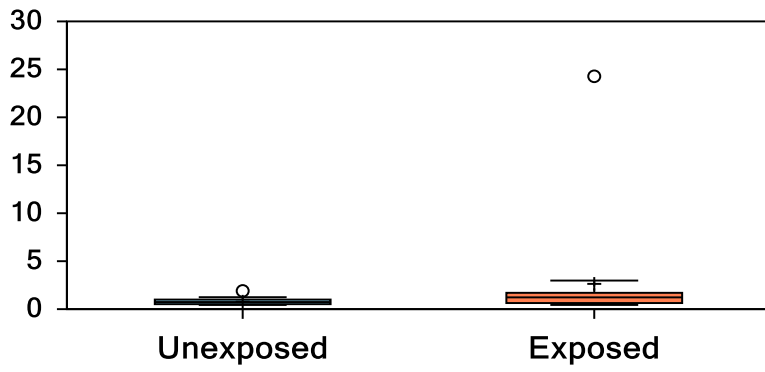

### indole-3-carboxylic acid

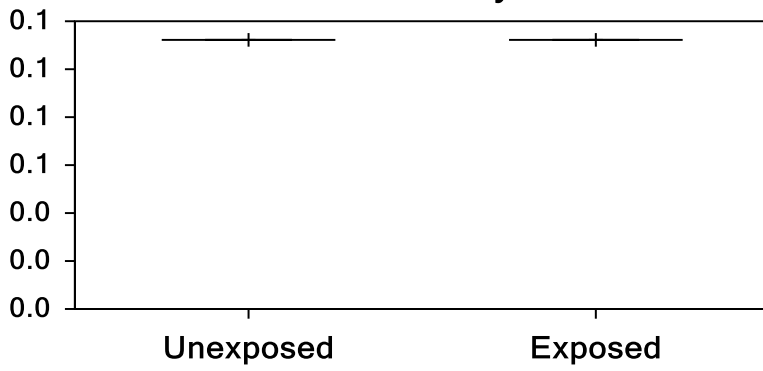

### indolepropionate

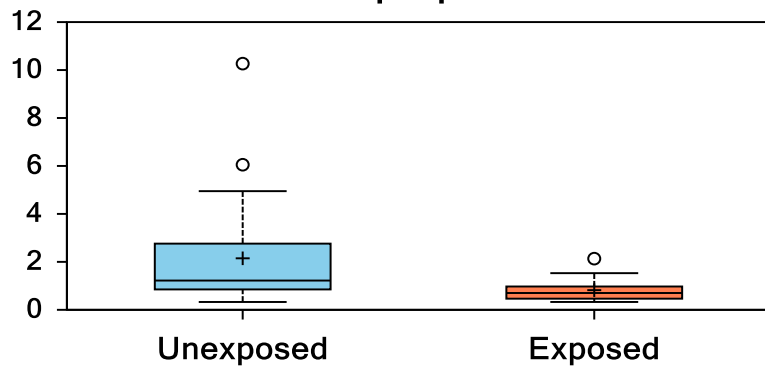

### Isobar: leucylisoleucine, isoleucylleucine

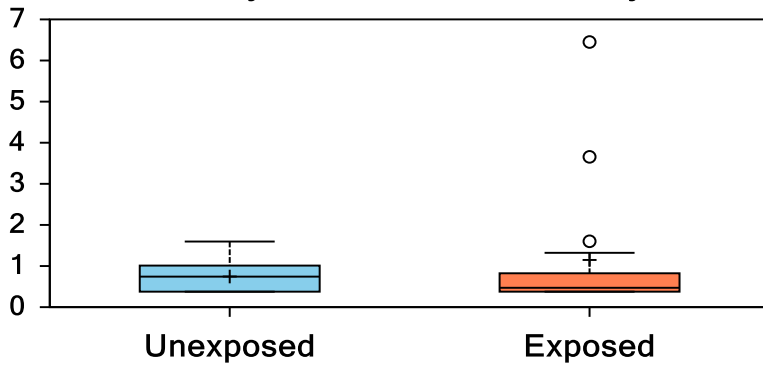

### isobutyrylcarnitine

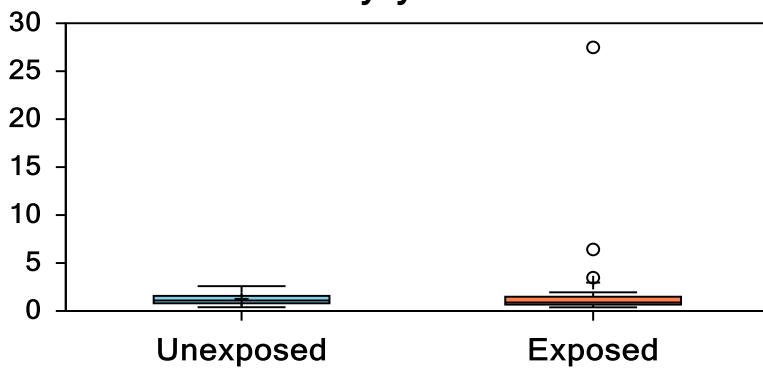

### isoleucylalanine

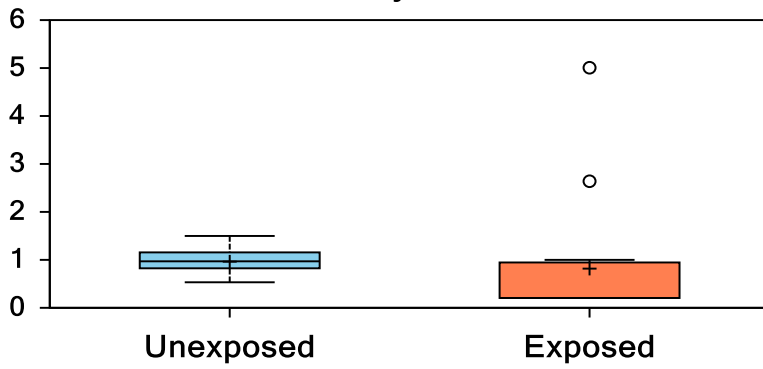



isoleucylglycine

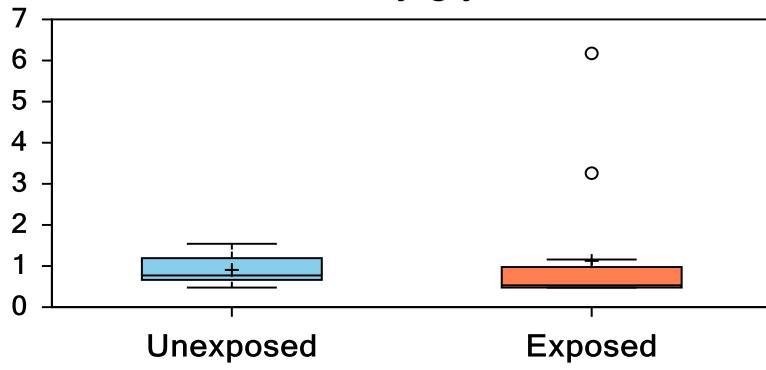

isoleucylmethionine

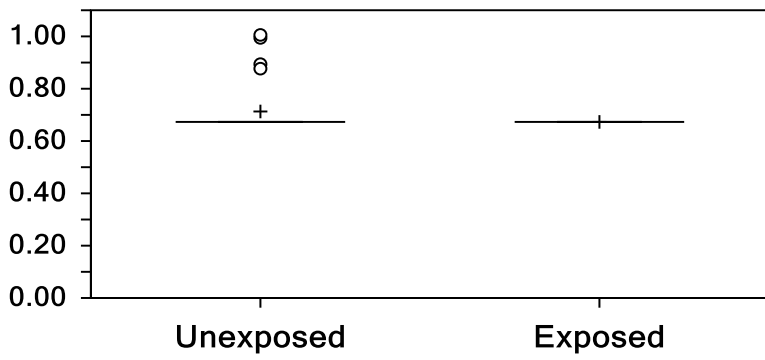

isoleucylserine

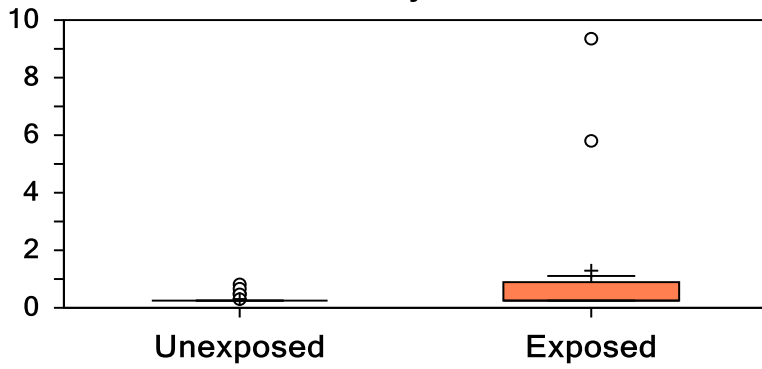

### isovalerate

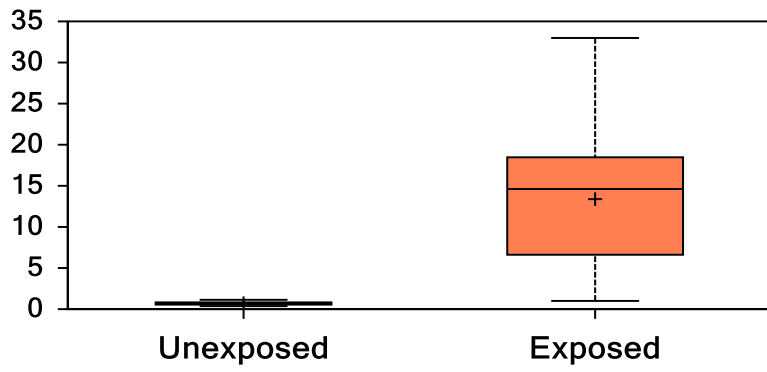

### ketamine

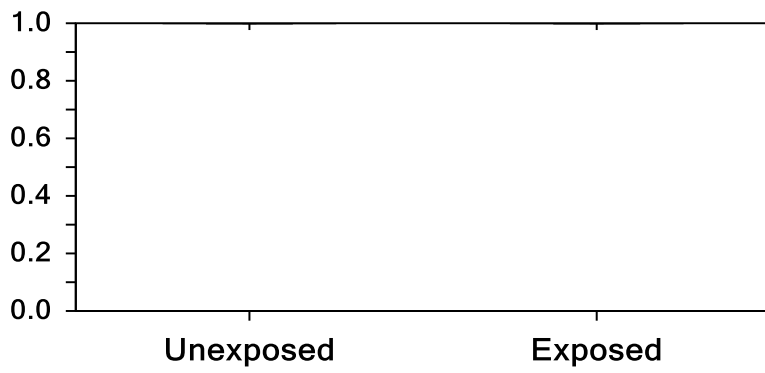

### lactate

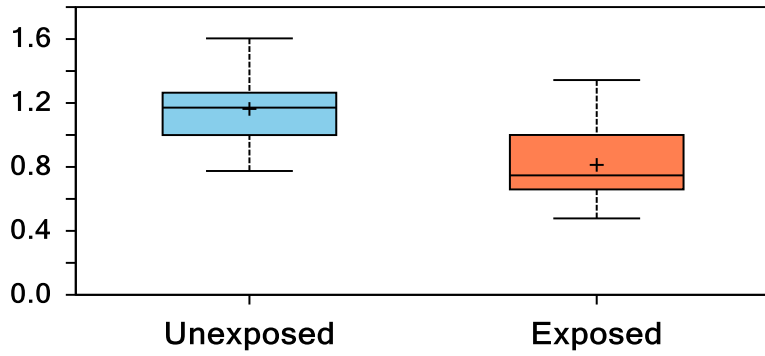

**laurate (12:0)**

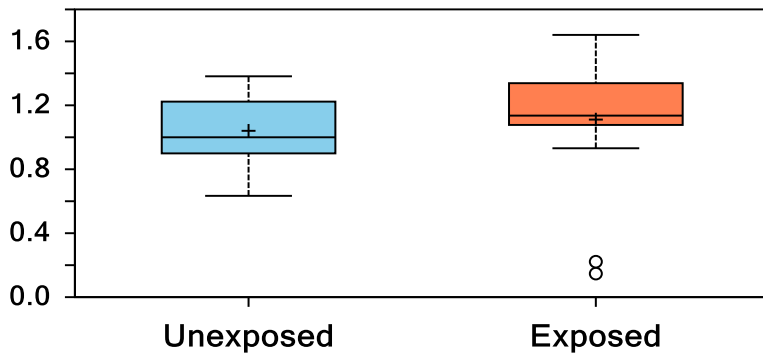

**leucylalanine**

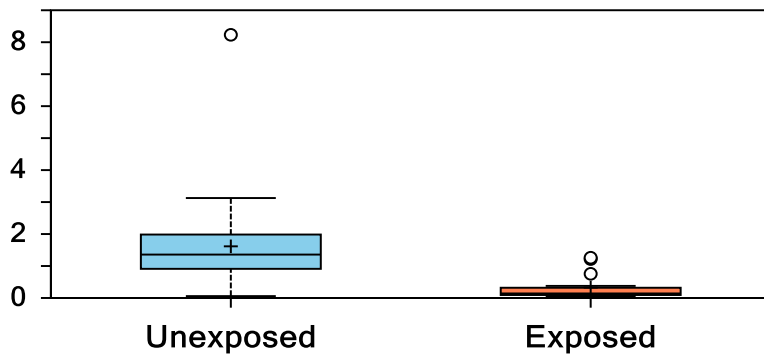

**leucylaspartate**

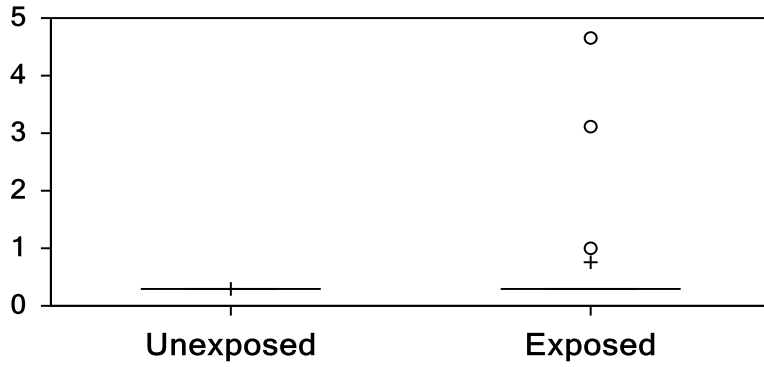

leucylleucine

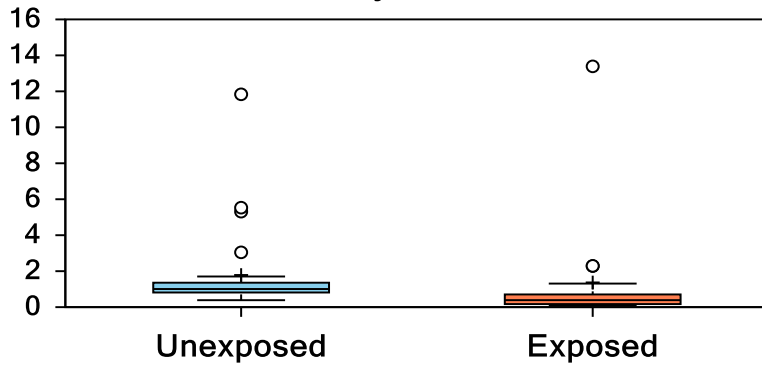

leucylserine

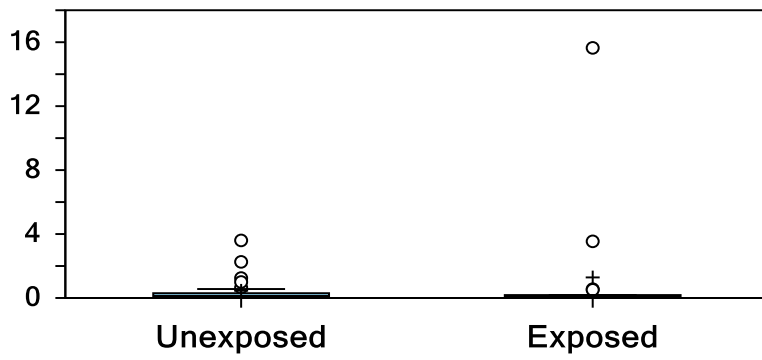

leukotriene B4

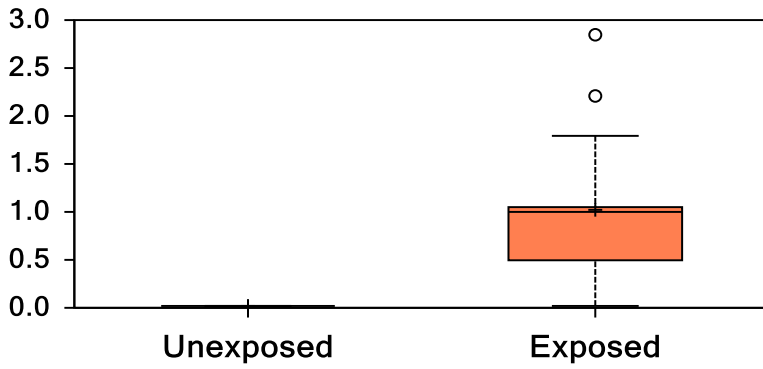

### lignocerate (24:0)

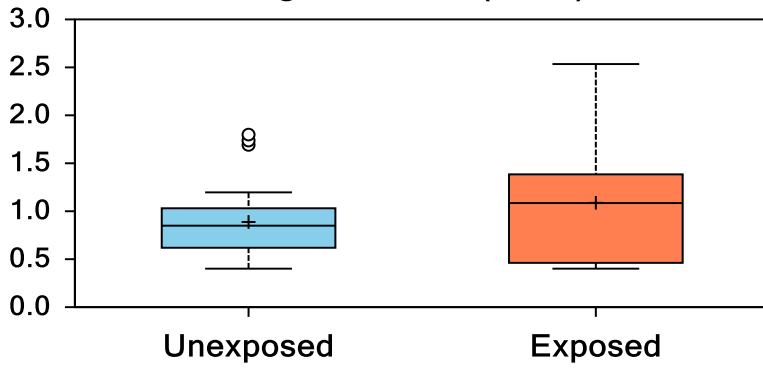

### linolenate [alpha or gamma; (18:3n3 or 6)

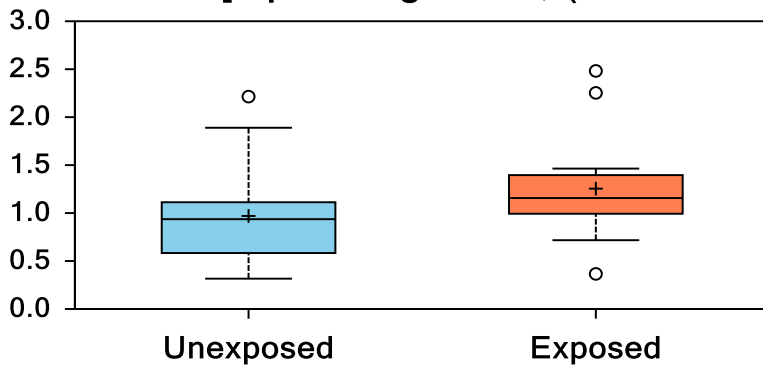

### lysylleucine

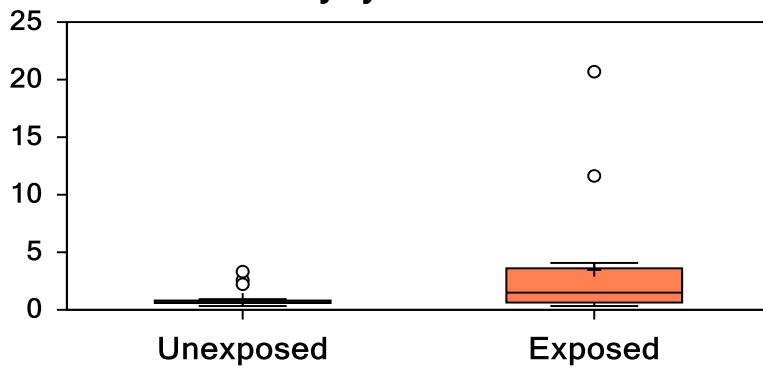

**mandelate**

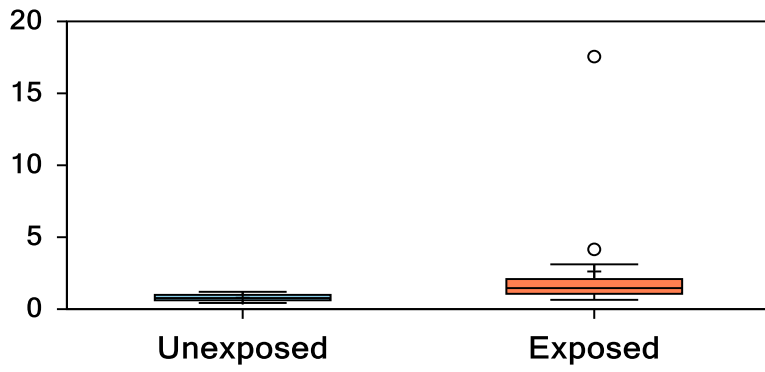

**margarate (17:0)**

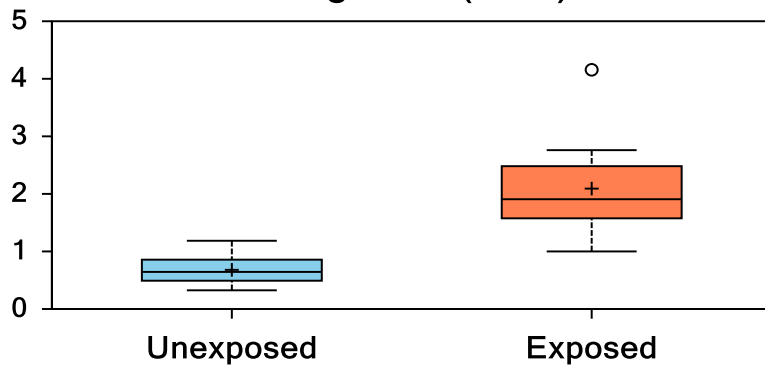

**methionine sulfoxide**

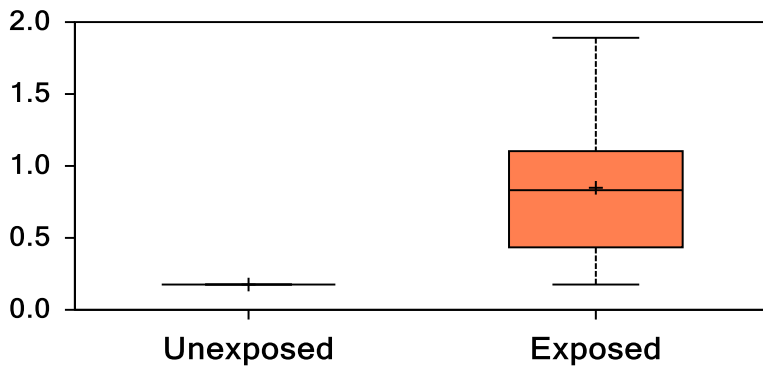

**methyl-4-hydroxybenzoate**

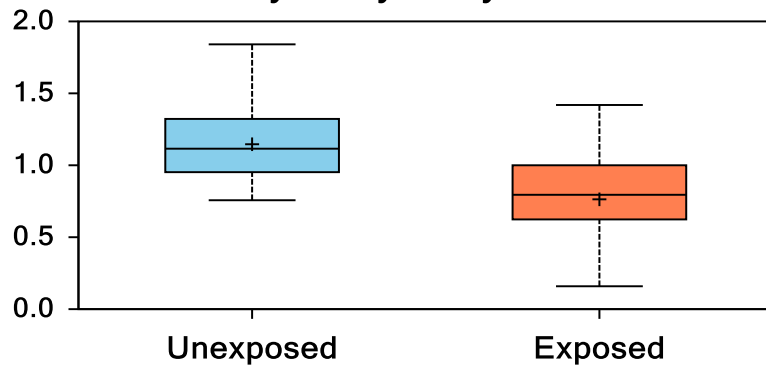

**metoprolol**

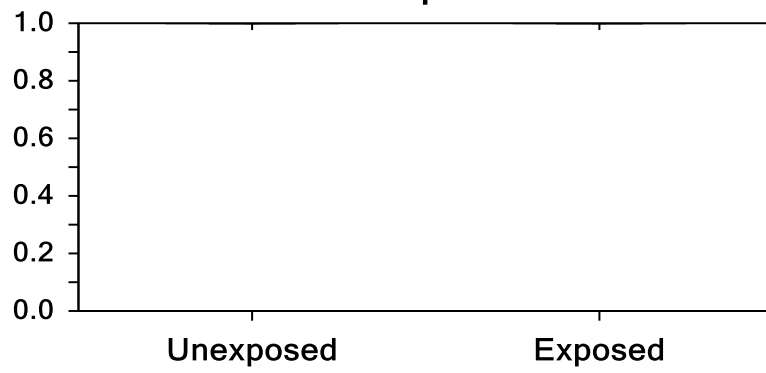

**myristate (14:0)**

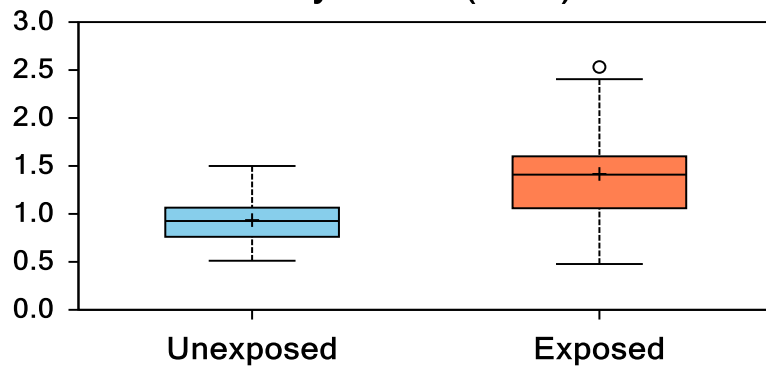

### N-(2-furoyl)glycine

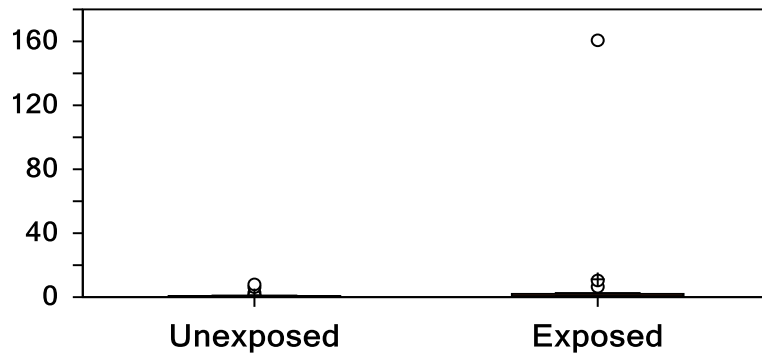

### N1-methylguanosine

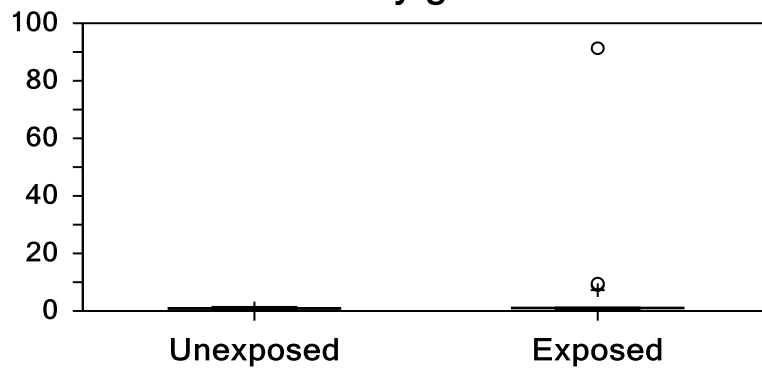

### N2-methylguanosine

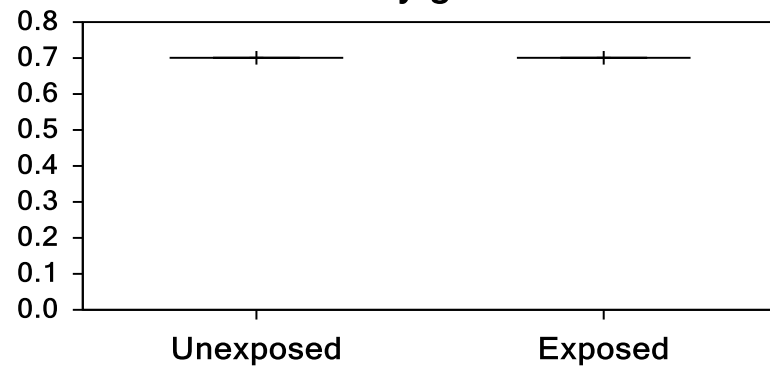



### N6-carbamoylthreonyladenosine

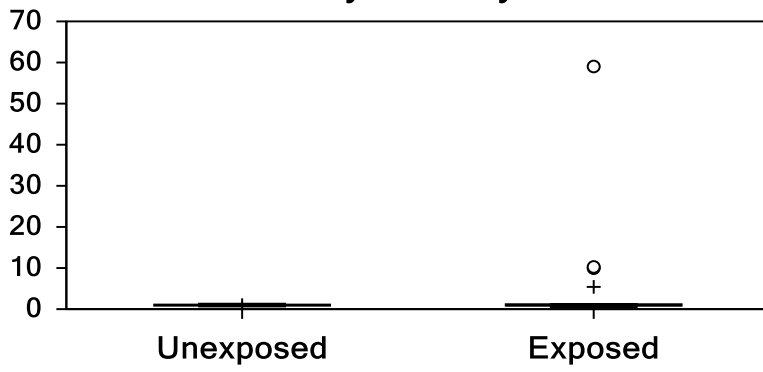

### N-acetylalanine

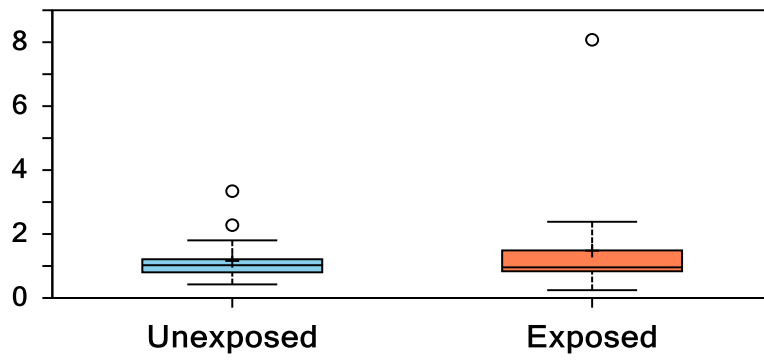

### N-acetyl-beta-alanine

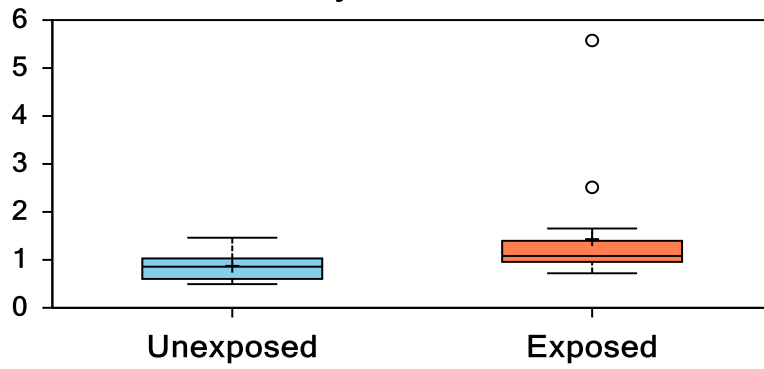

### N-acetylglutamine

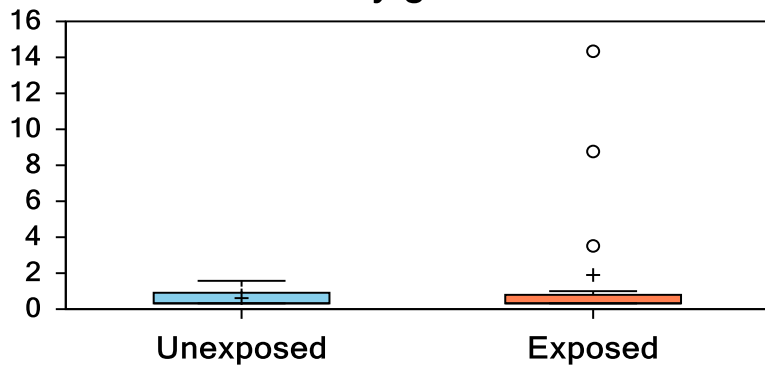

### N-acetylleucine

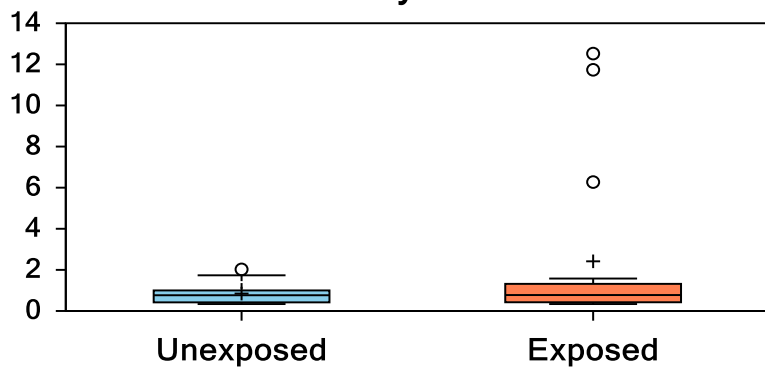

### N-acetylornithine

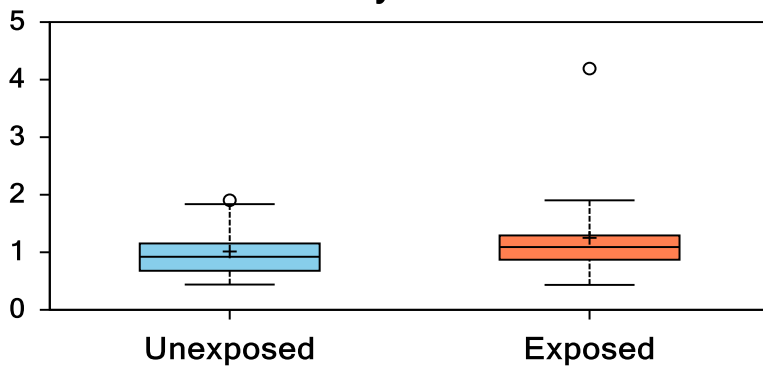

### N-acetylserine

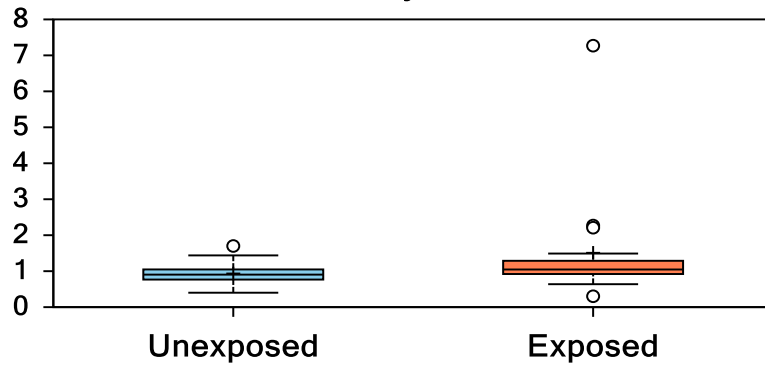

### N-acetylvaline

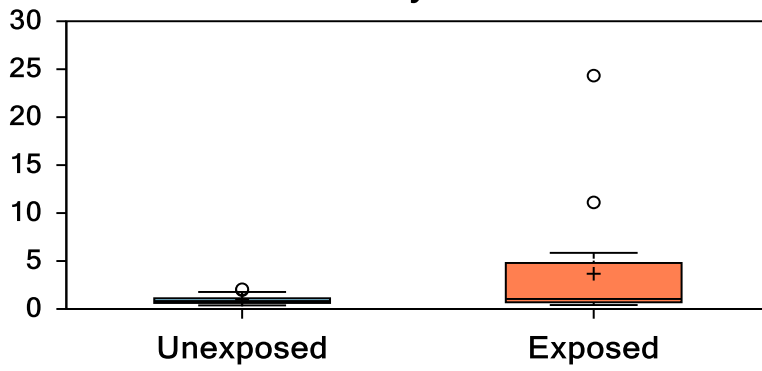

### N-carbamoylaspartate

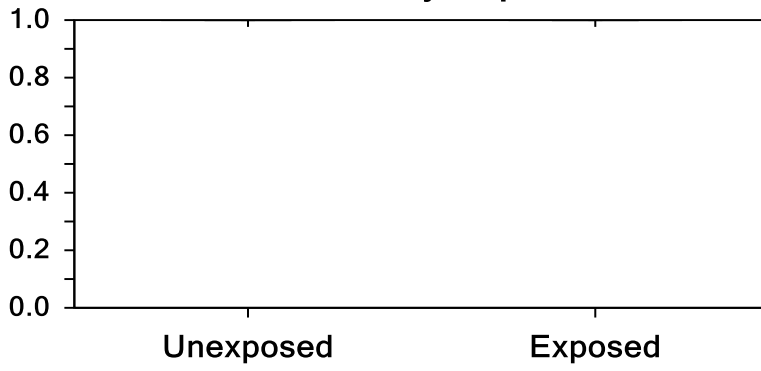

### nicotinate

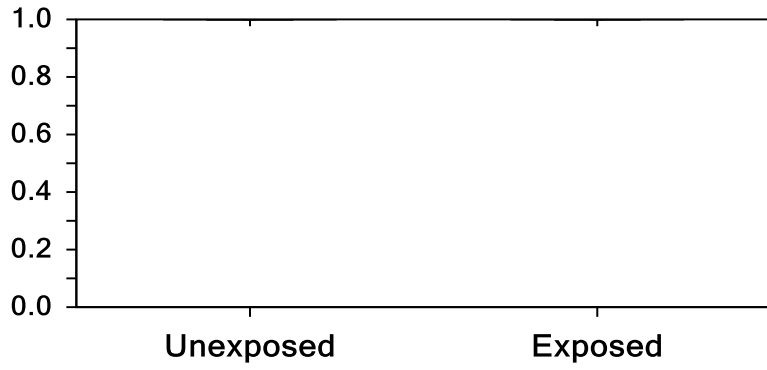

### N-methyl proline

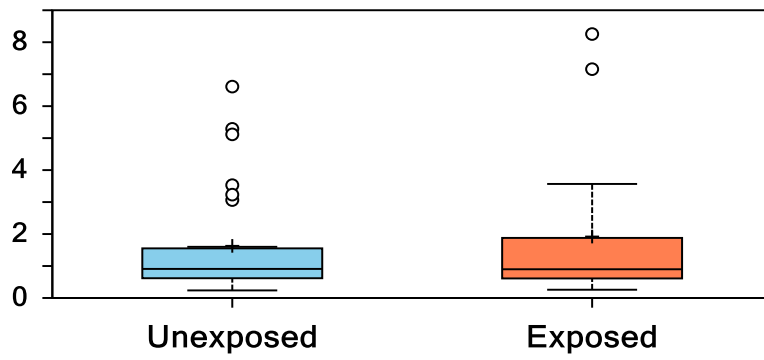

### octadecanedioate

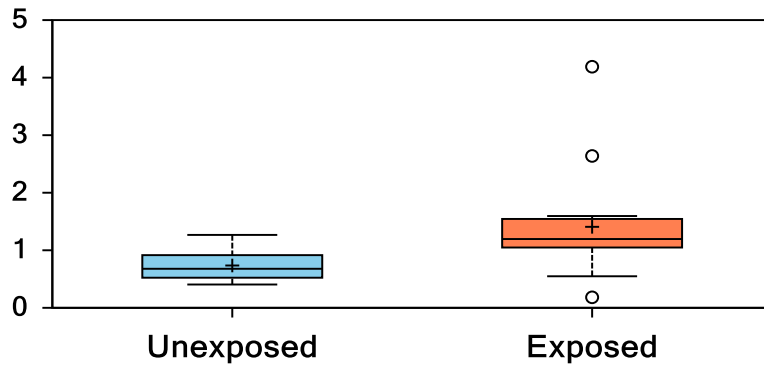

### oleic ethanolamide

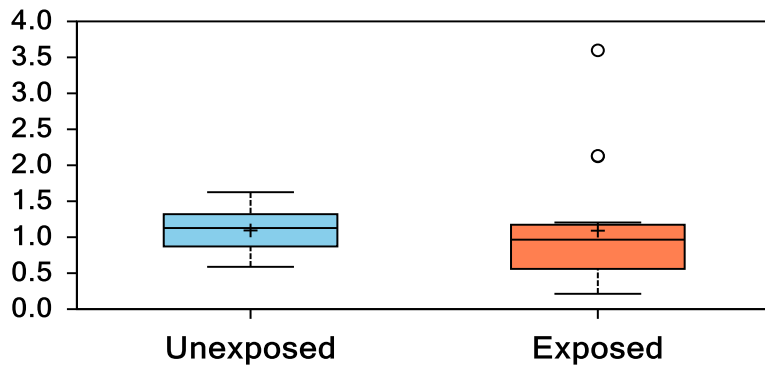

### ornithine

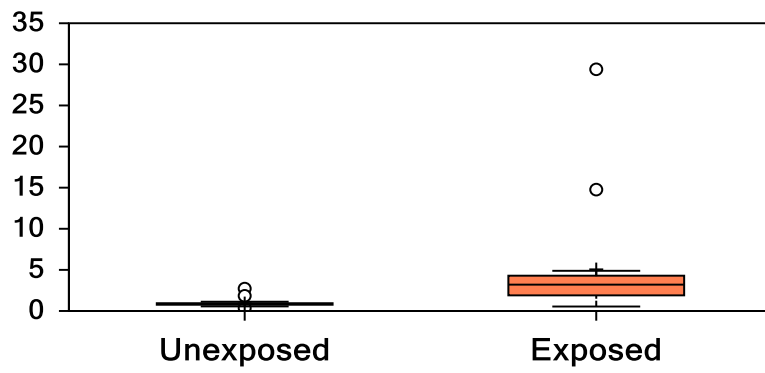

### palmitate (16:0)

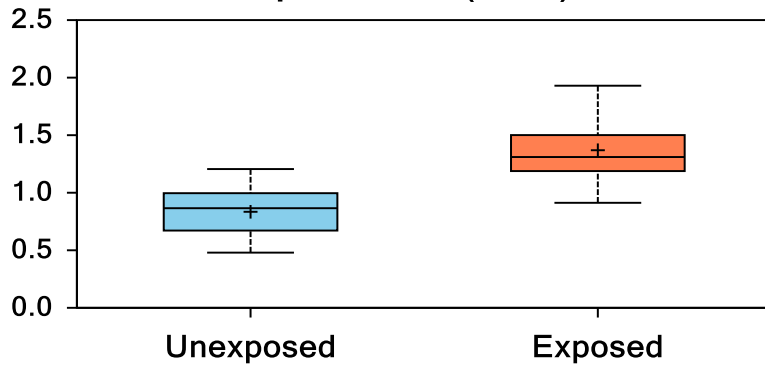

palmitoyl sphingomyelin

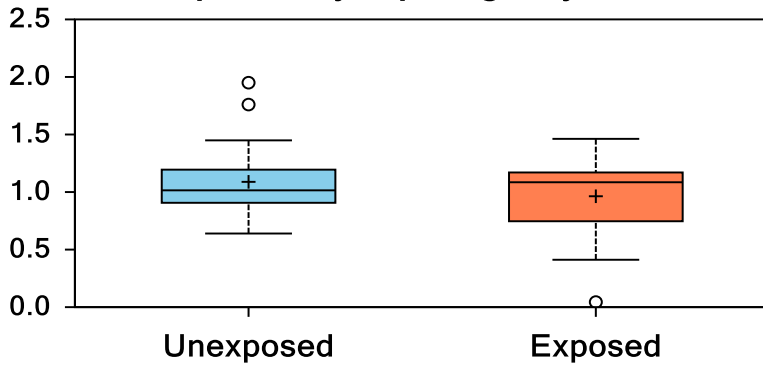

paraxanthine

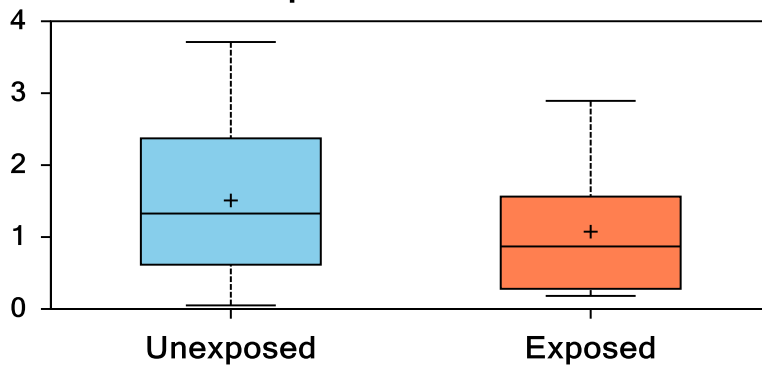

pentadecanoate (15:0)

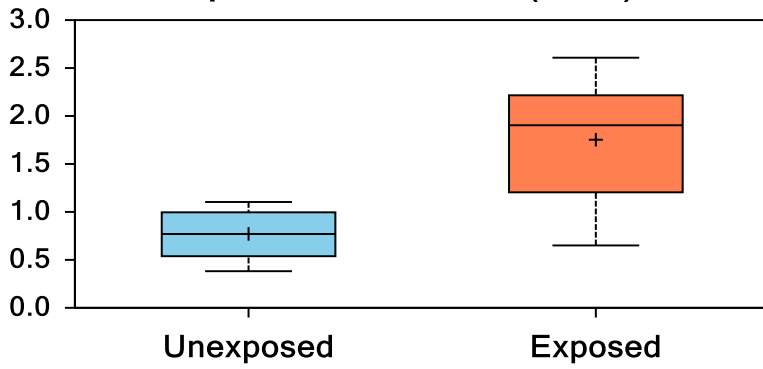

phenolphthalein beta-D-glucuronide

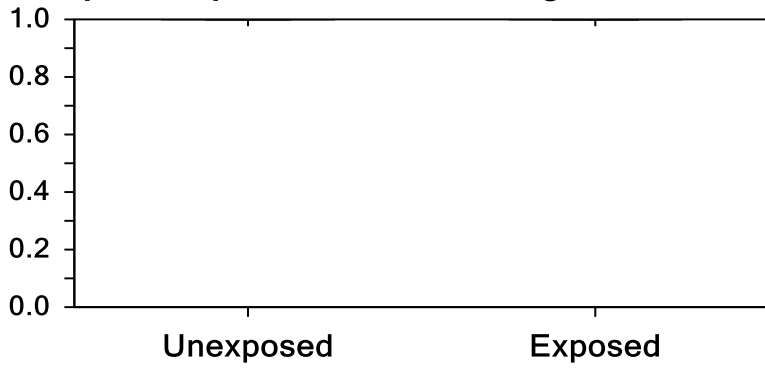

phenylacetylphenylalanine

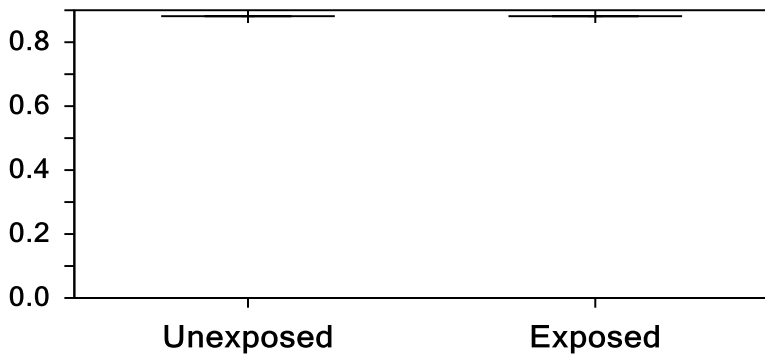

phenylalanylleucine\*

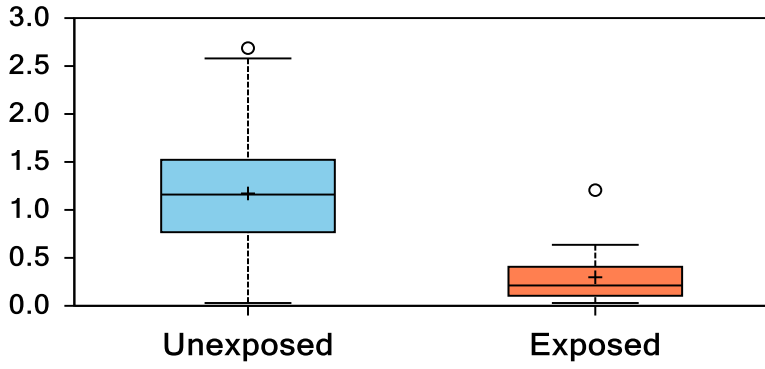

### phenyllactate (PLA)

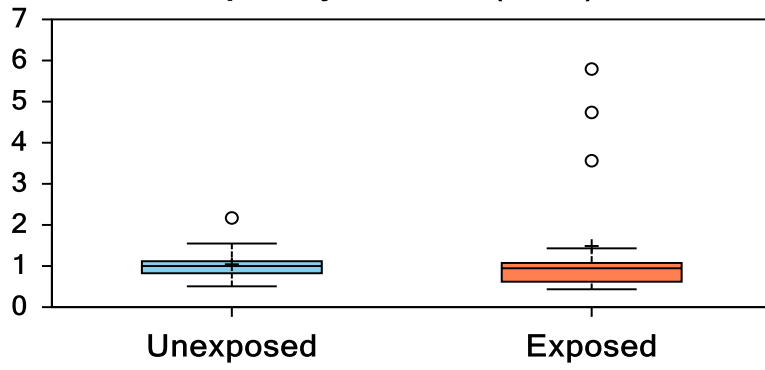

### phosphate

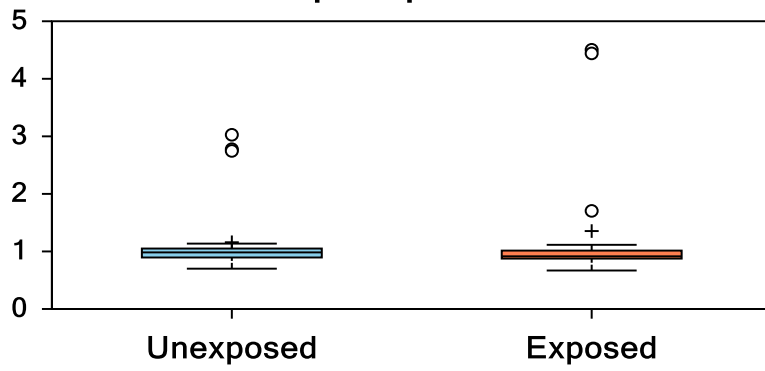

### pinitol

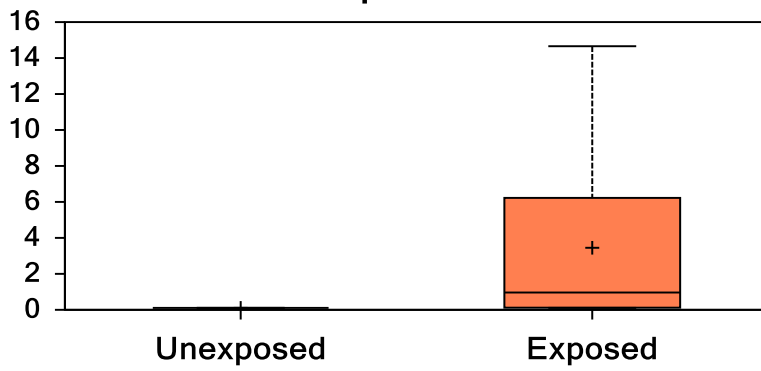



**pregn steroid monosulfate\***

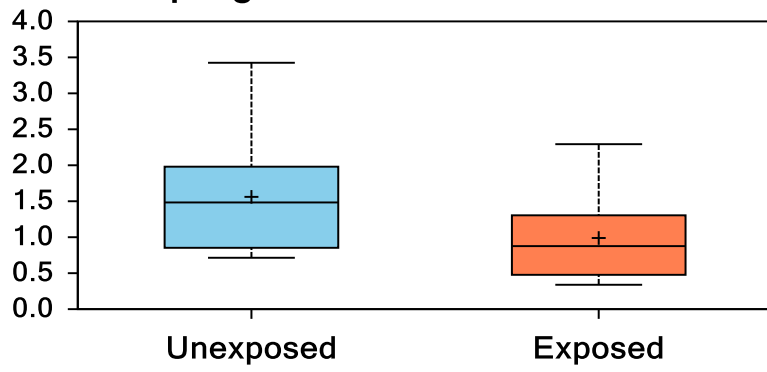

**pregnenolone sulfate**

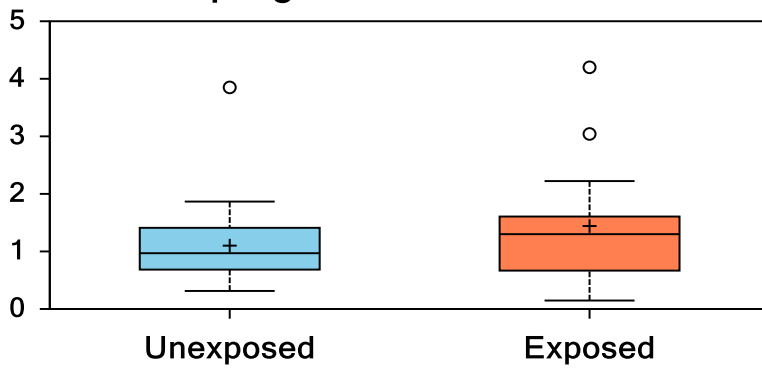

**prolylglycine**

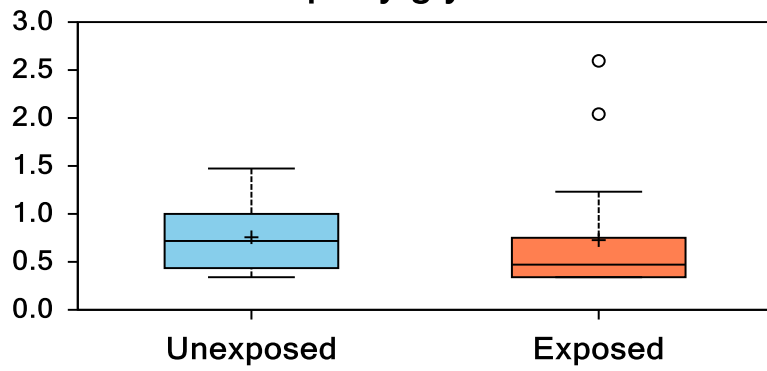

**propionylcarnitine**

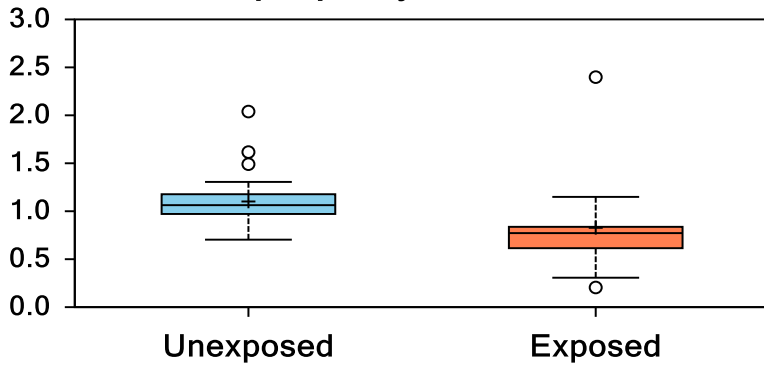

**pyridoxine (Vitamin B6)**

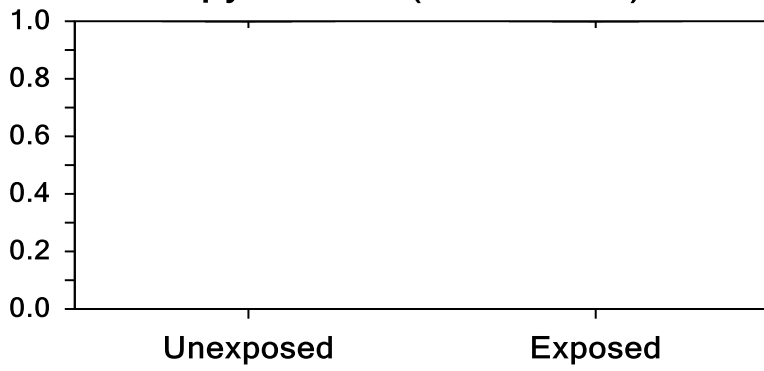

**pyroglutamylglycine**

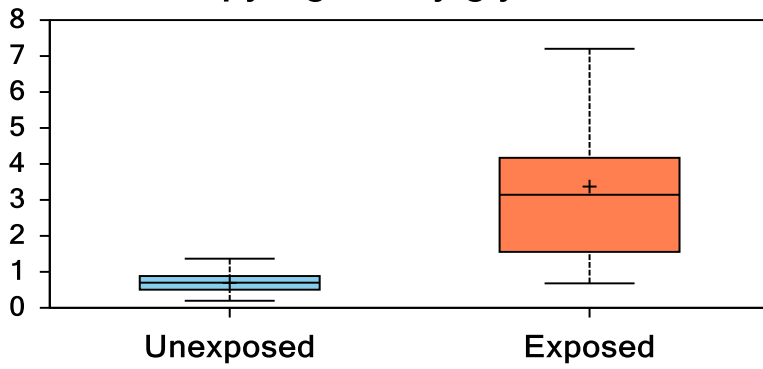

### quinate

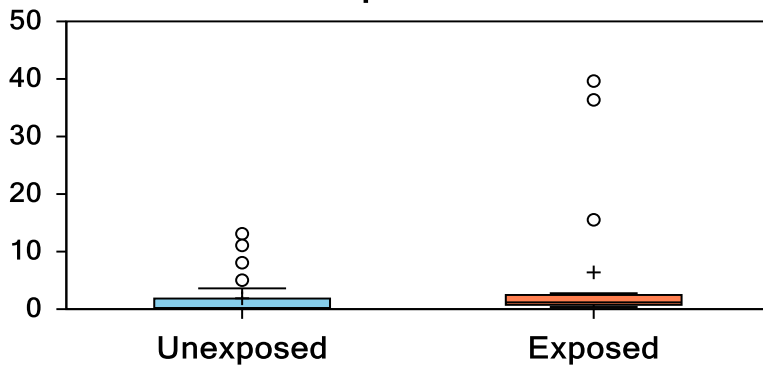

### ribitol

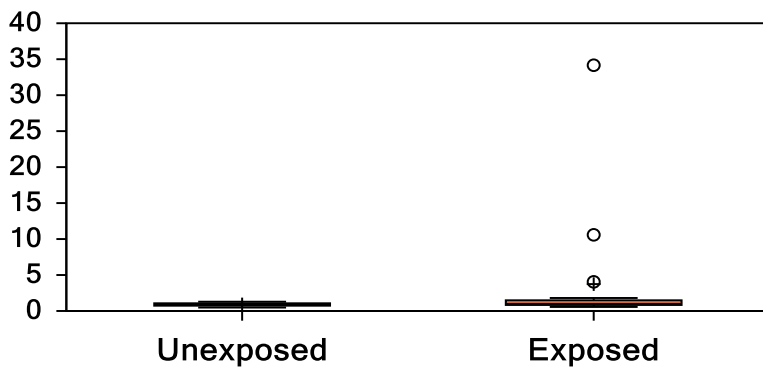

### saccharin

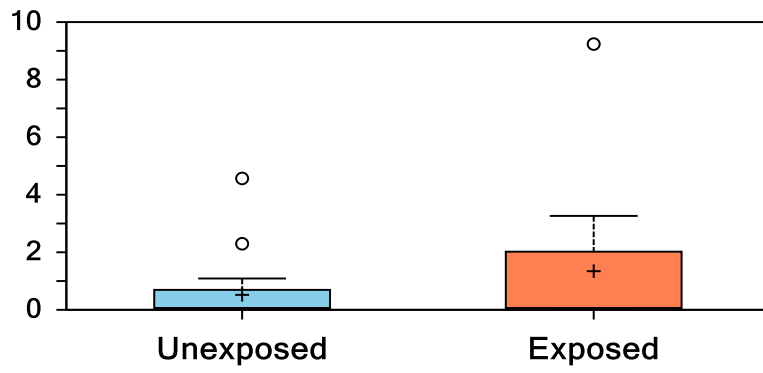

### sarcosine (N-Methylglycine)

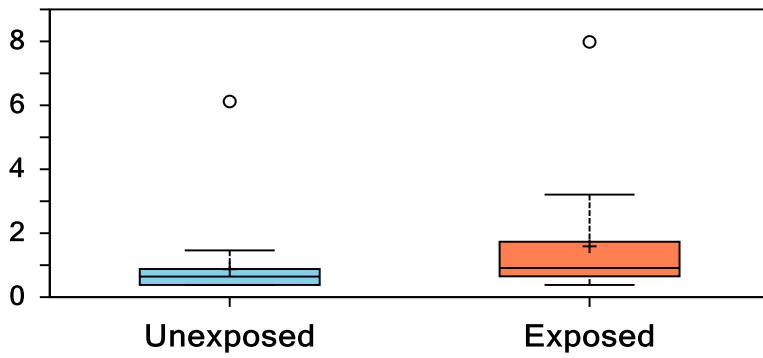

### serine

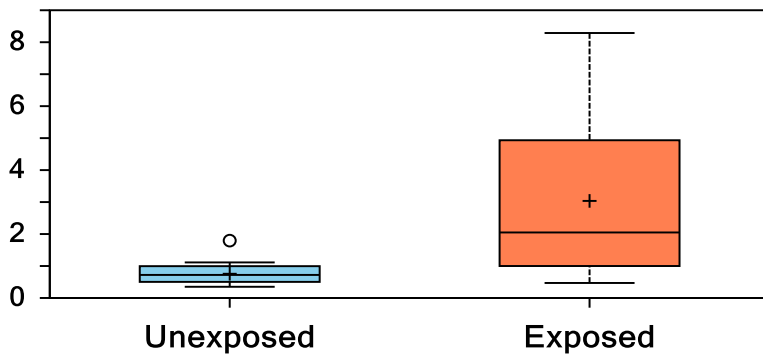

### serylleucine

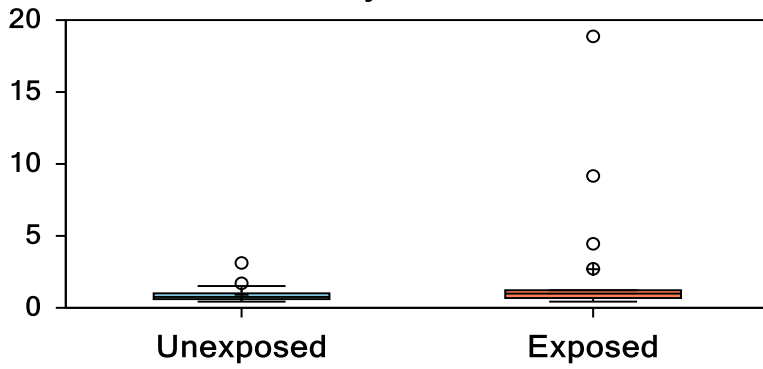

### sorbitol

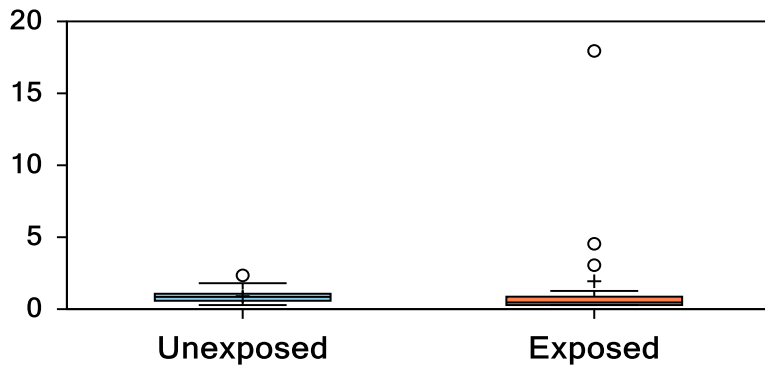

### squalene

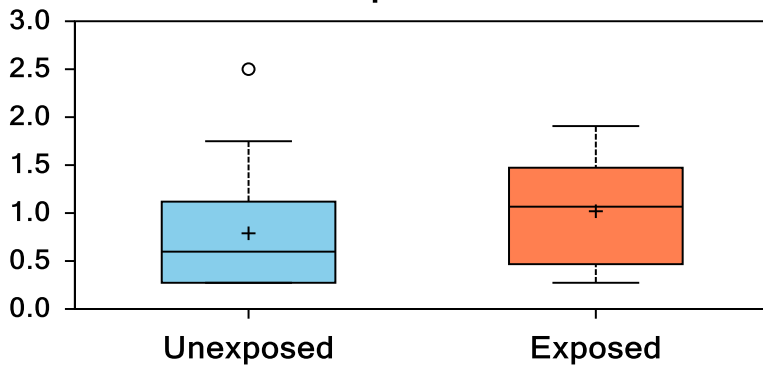

### stearate (18:0)

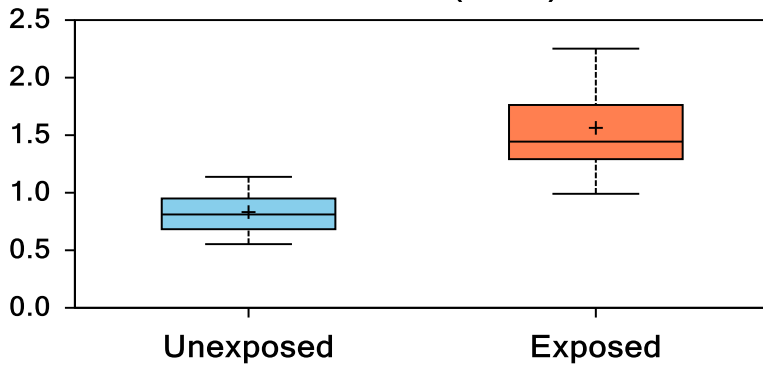

### stearoylcarnitine

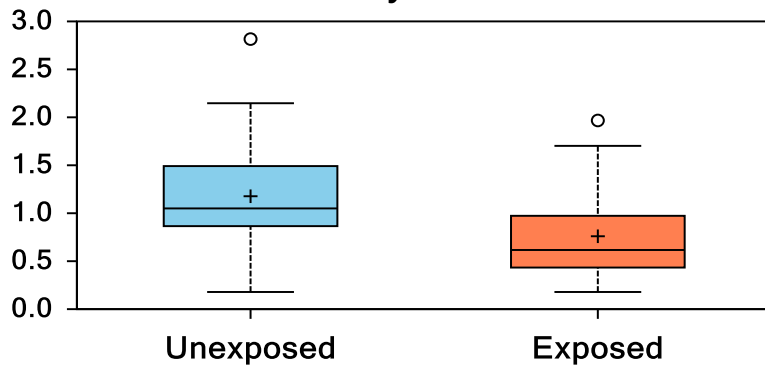

### succinylcarnitine

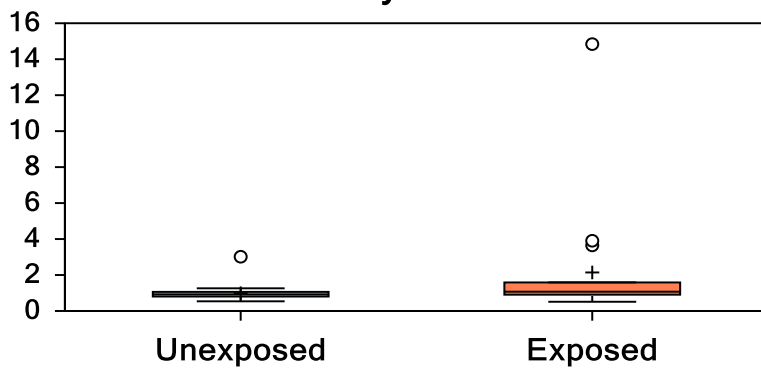

### taurocholate

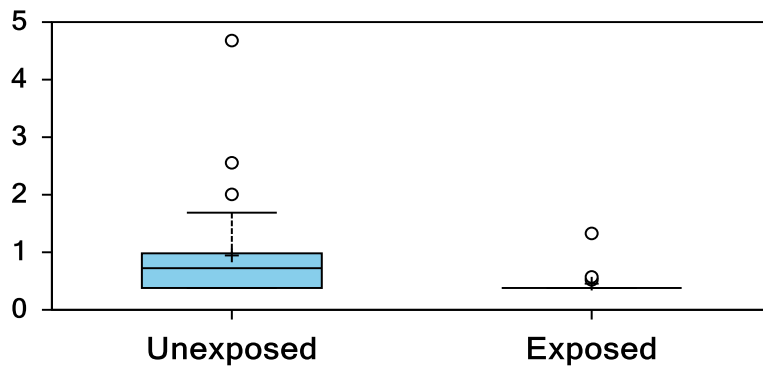

**tauro lithocholate 3-sulfate**

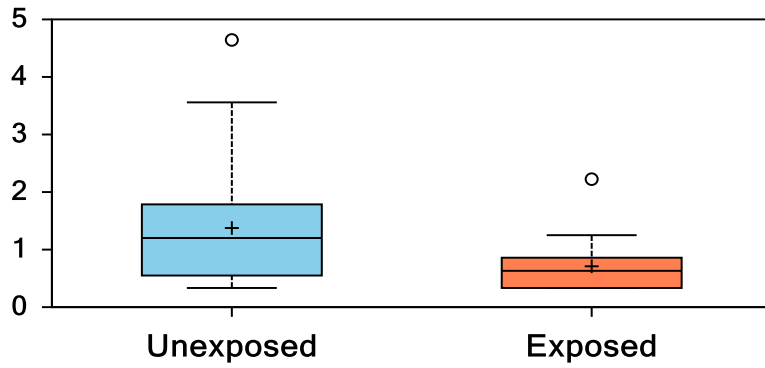

**tetradecanedioate**

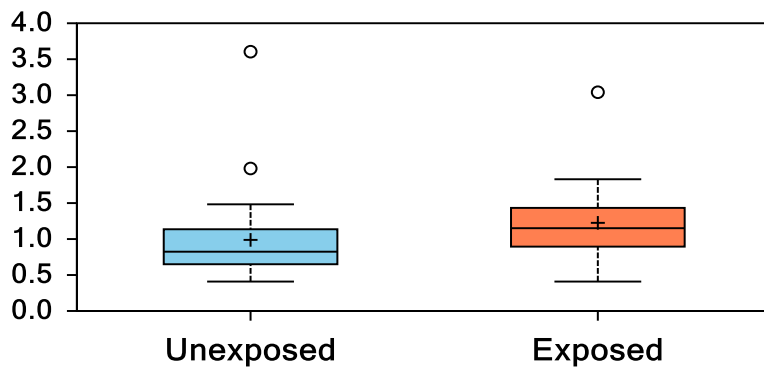

**threonate**

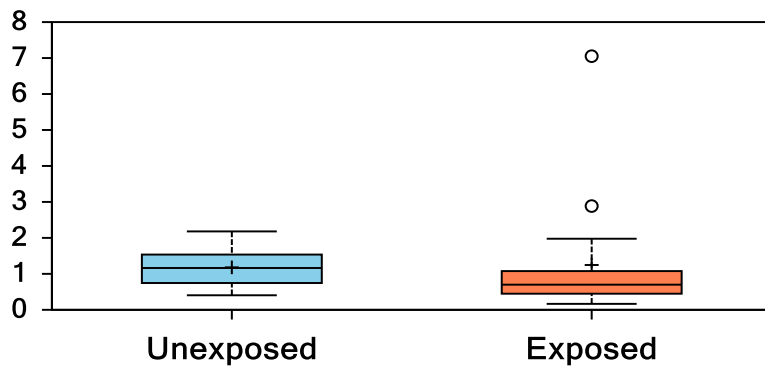

threonylphenylalanine

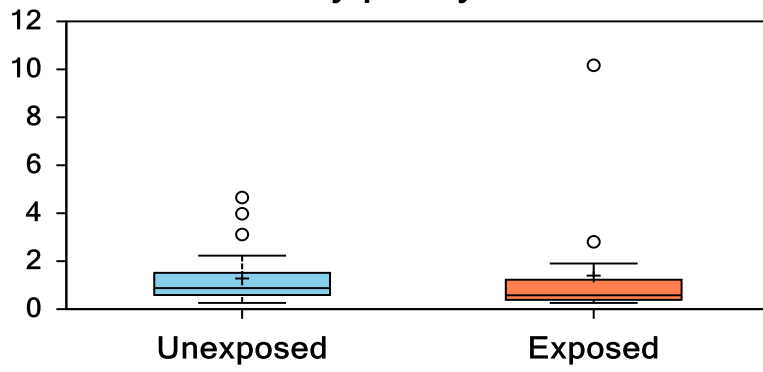

thymol sulfate

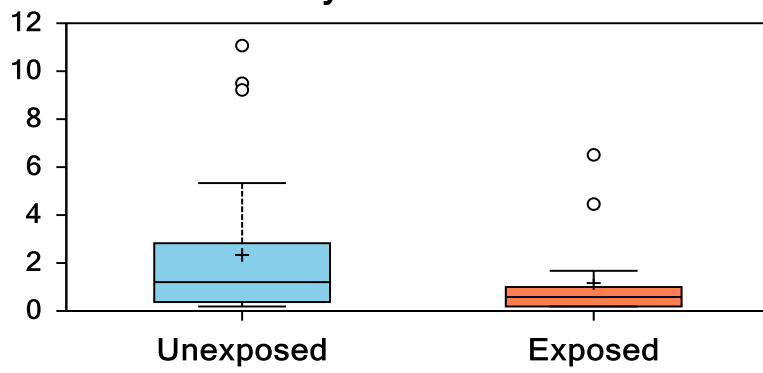

trans-4-hydroxyproline

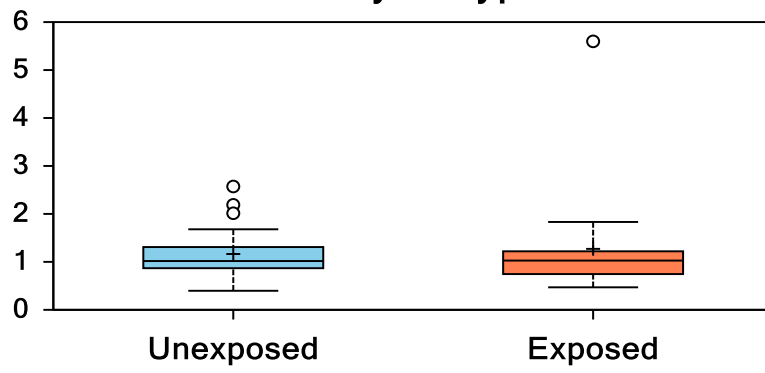



tryptamine

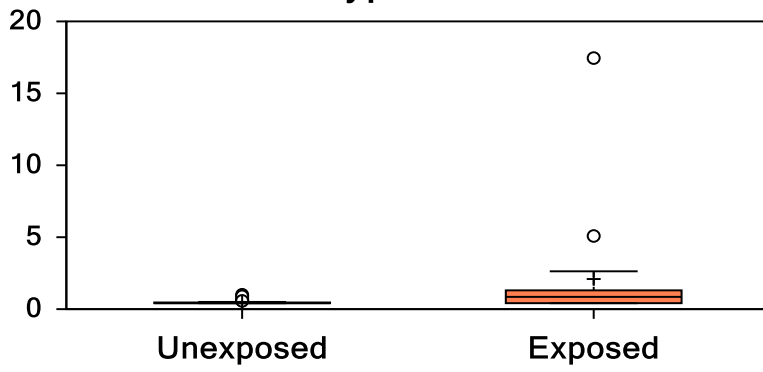

tryptophylasparagine

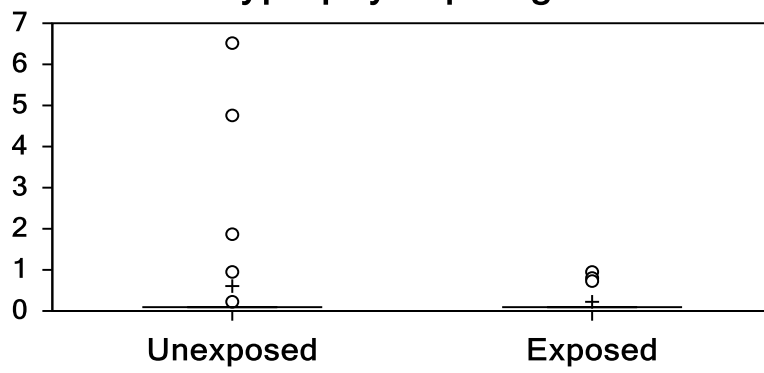

tyrosine

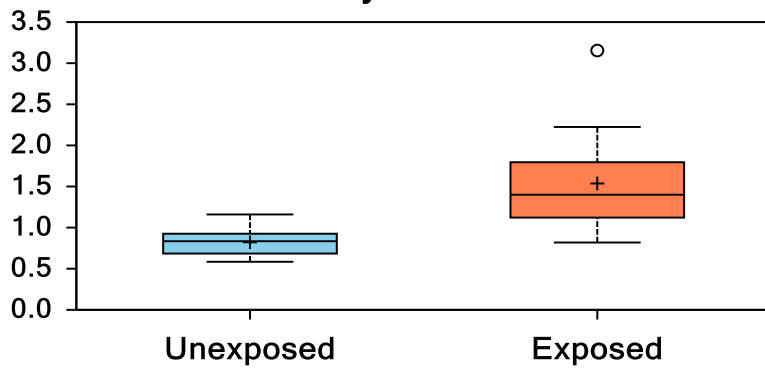

undecanedioate

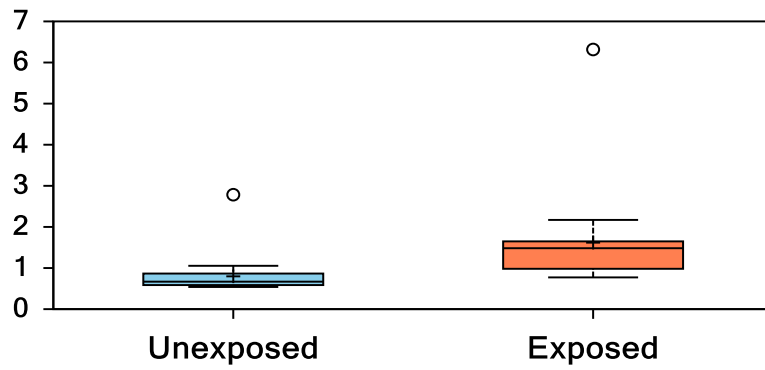

urate

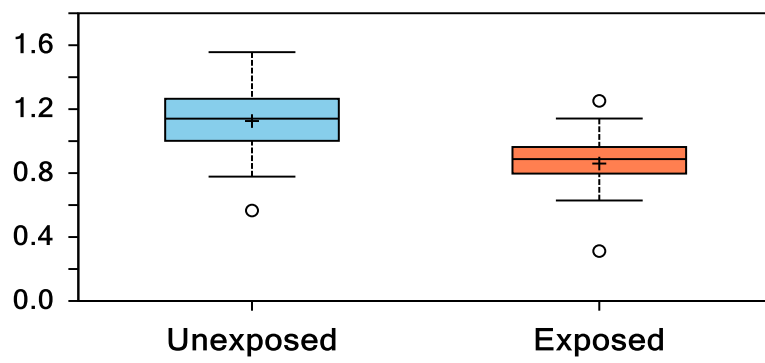

valerate

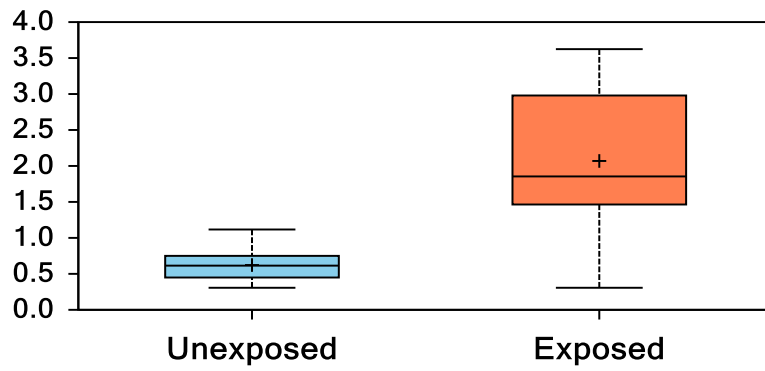

valylglutamate

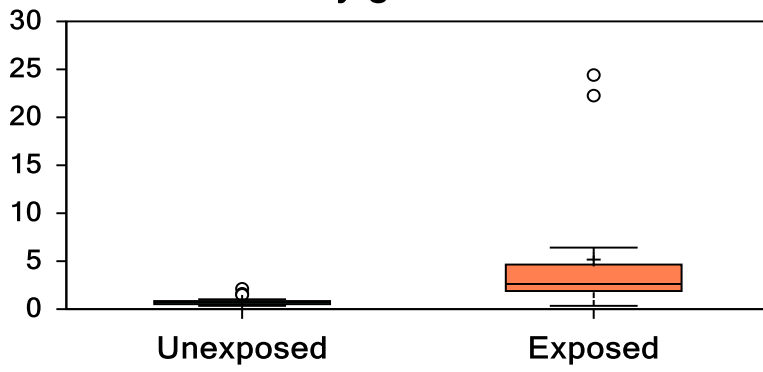

valylleucine

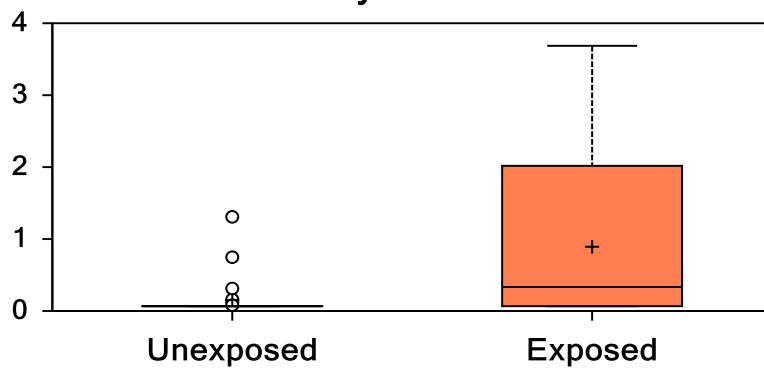

valylserine

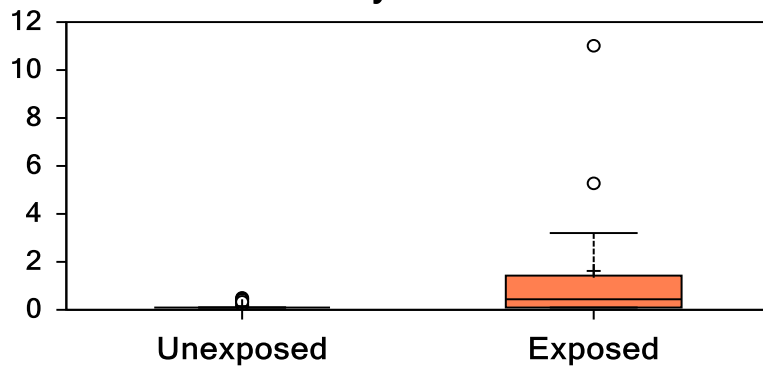

vancomycin

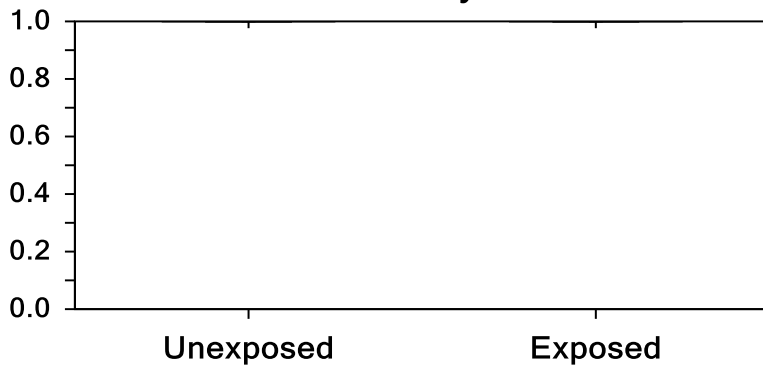

venlafaxine

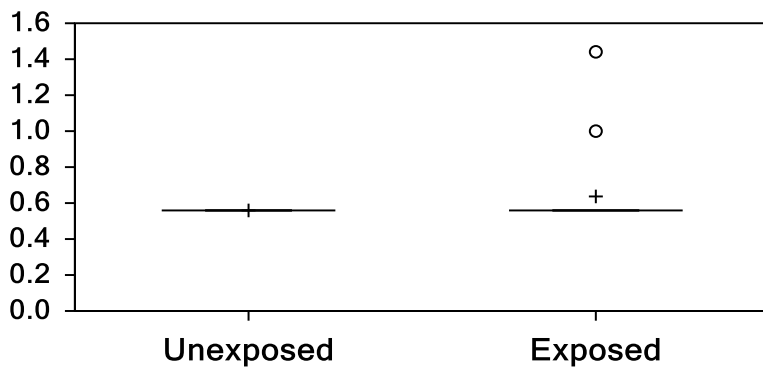

X - 02269

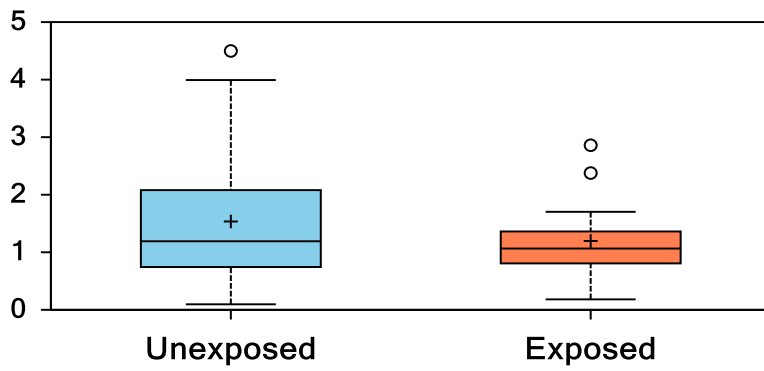

X - 07765

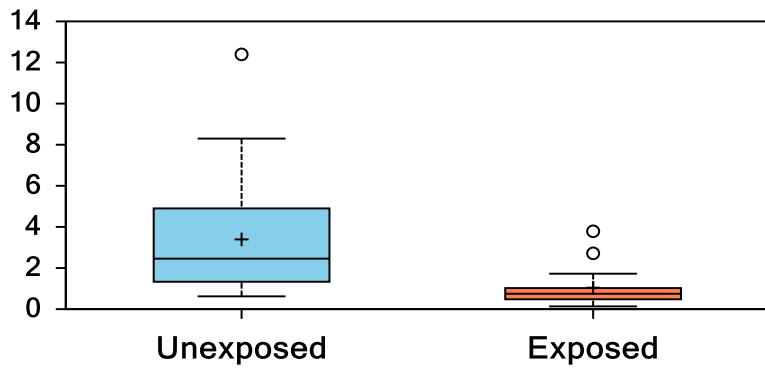

X - 11204

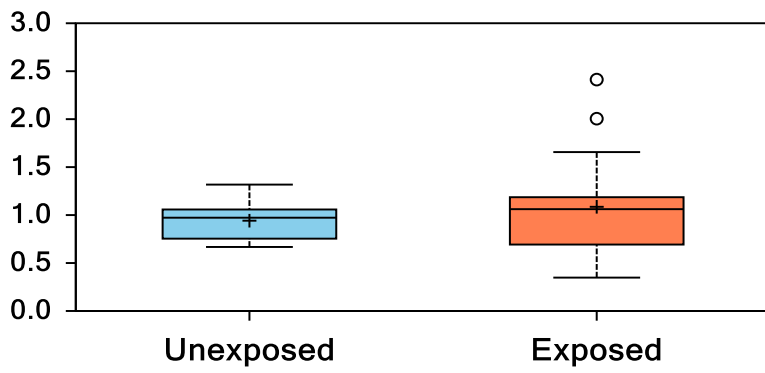

X - 11299

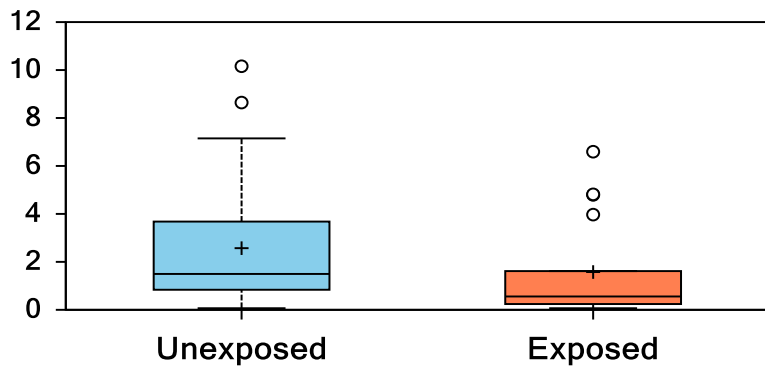

X - 11315

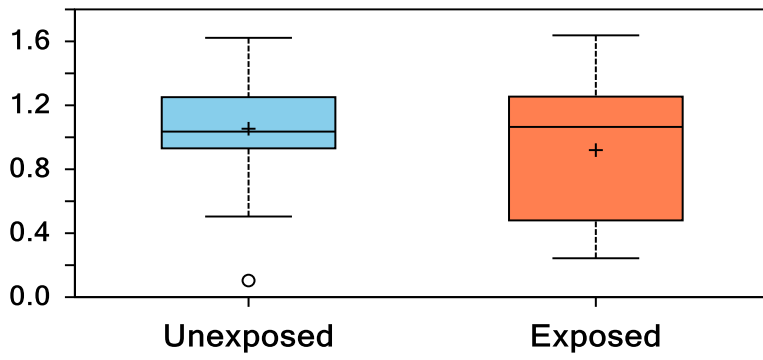

X - 11334

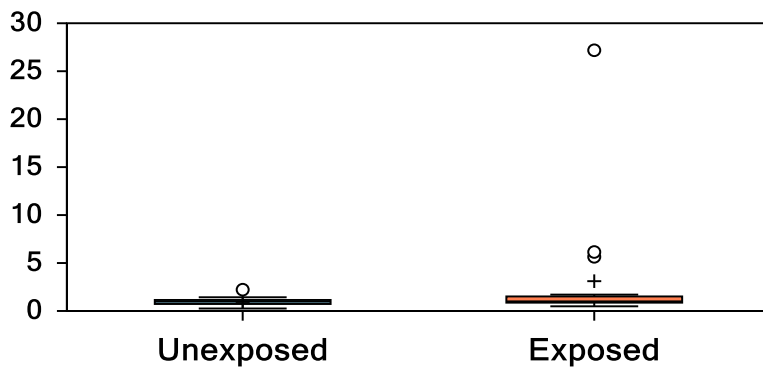

X - 11372

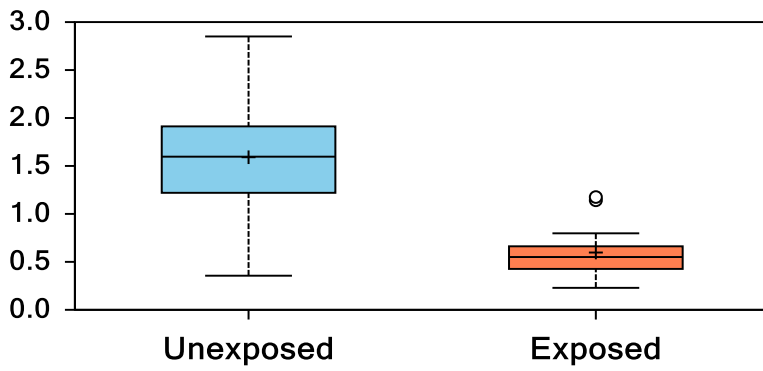

X - 11390

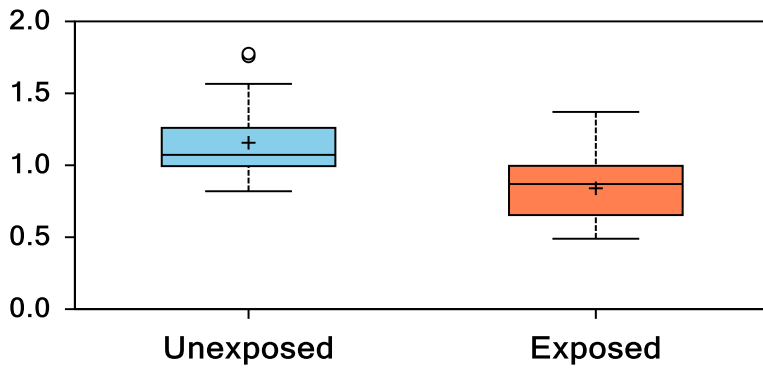

X - 11423

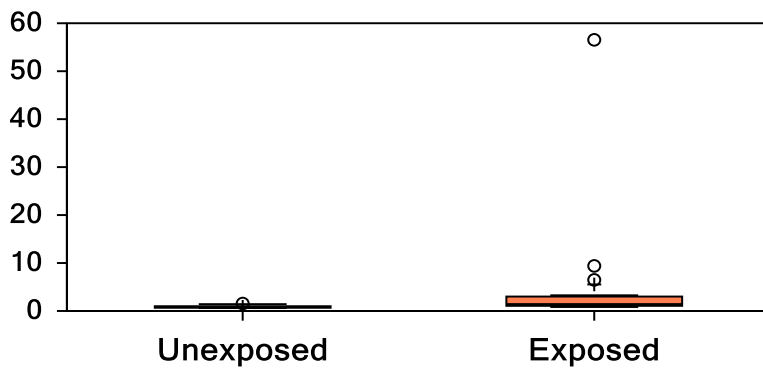

X - 11438

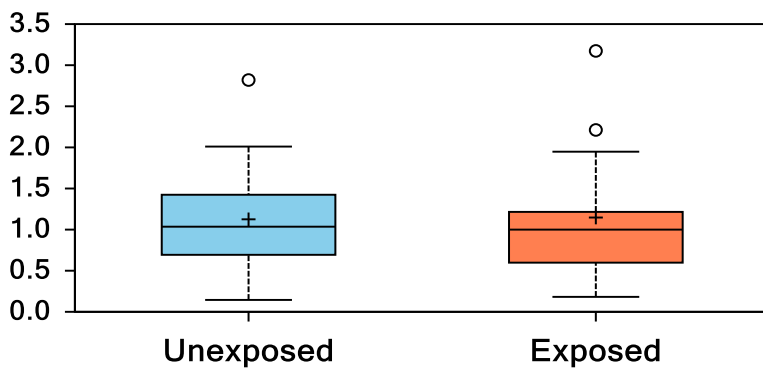

X - 11442

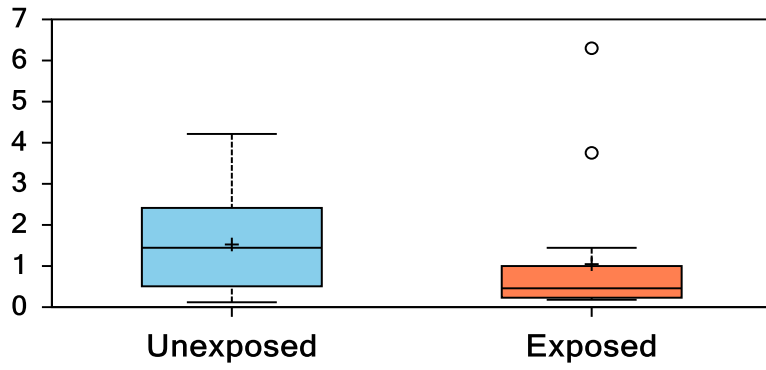

X - 11469

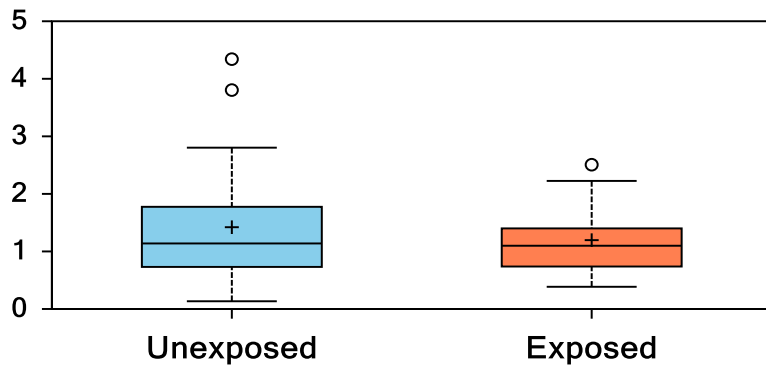

X - 11478

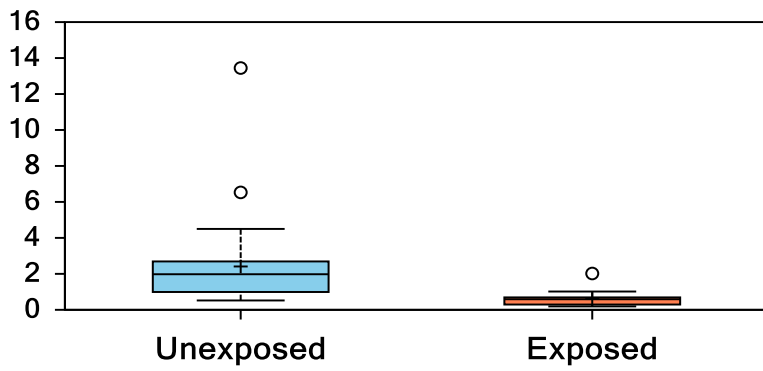



X - 11491

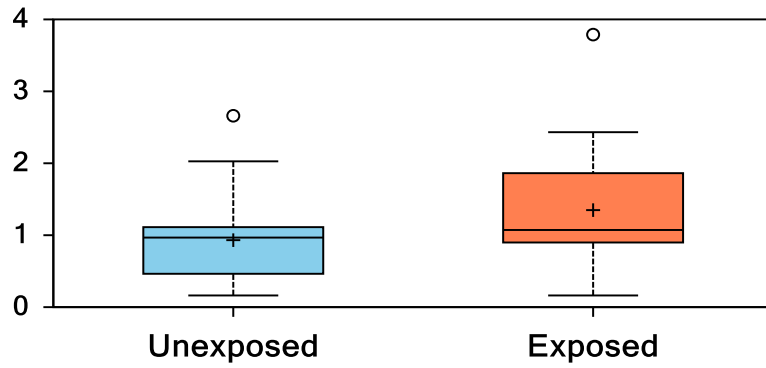

X - 11522

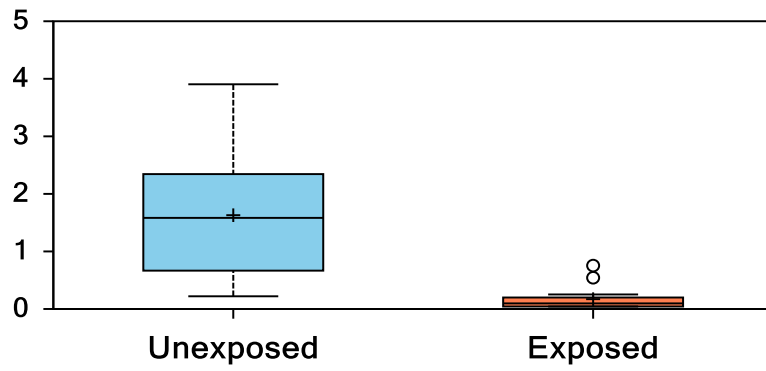

X - 11533

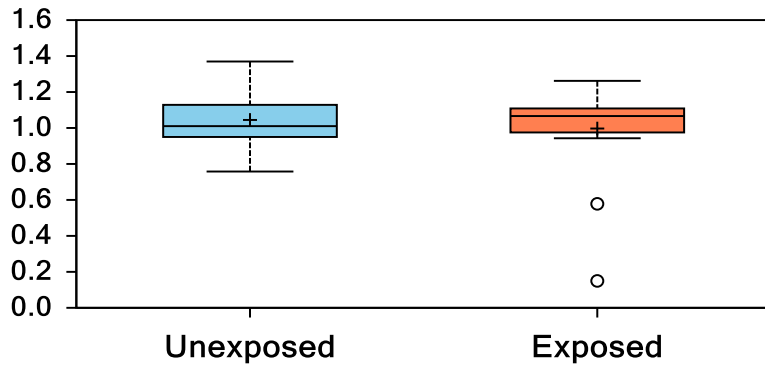

X - 11540

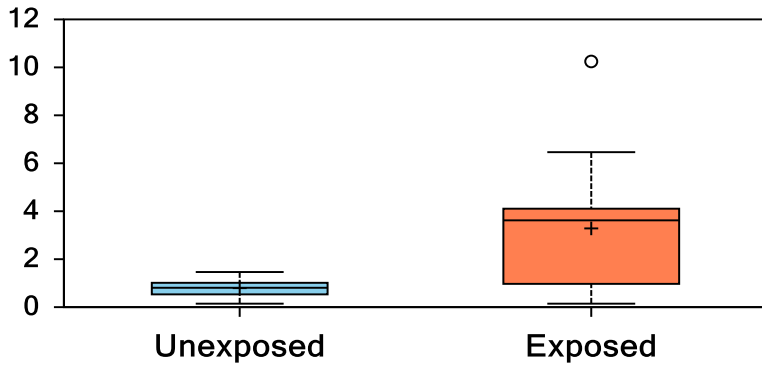

X - 11549

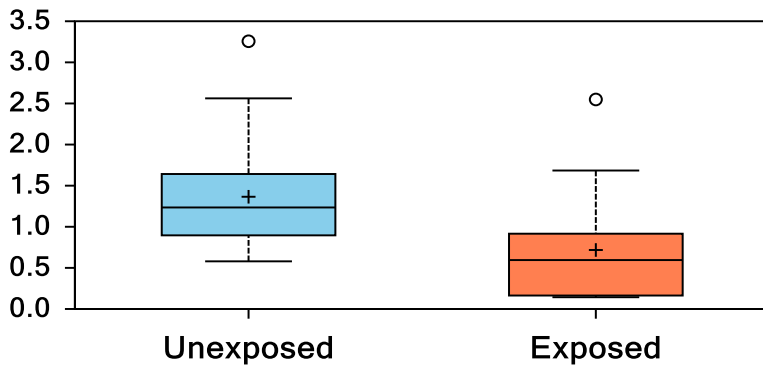

X - 11564

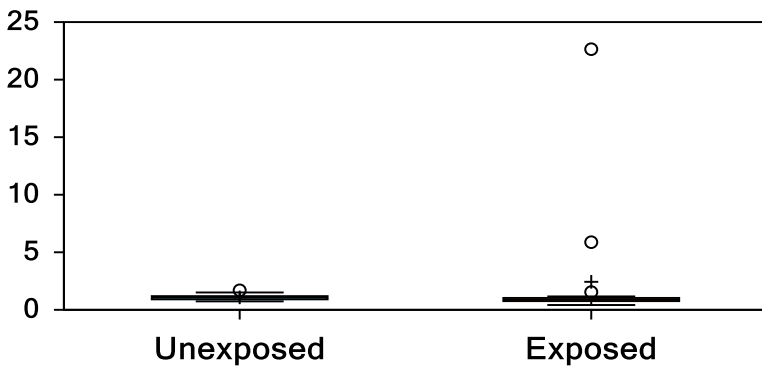

X - 11668

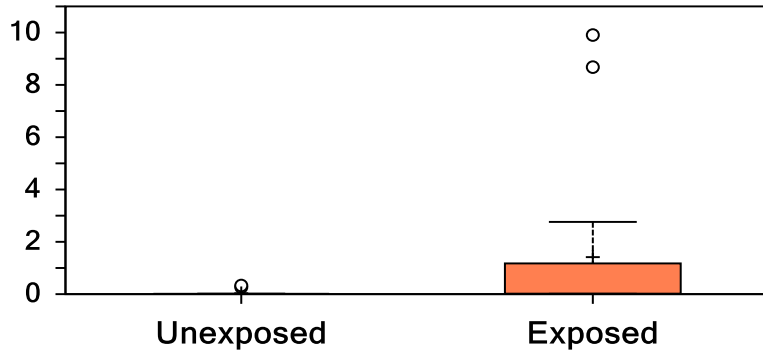

X - 11787

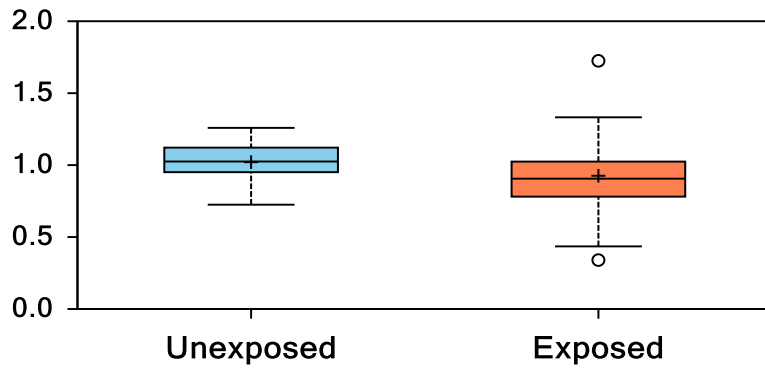

X - 11797

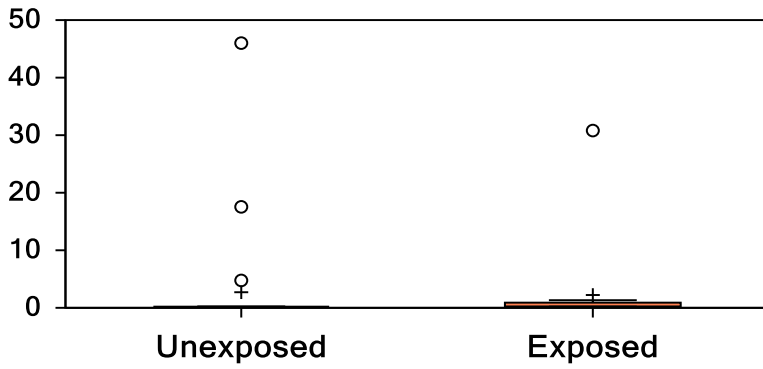

X - 11818

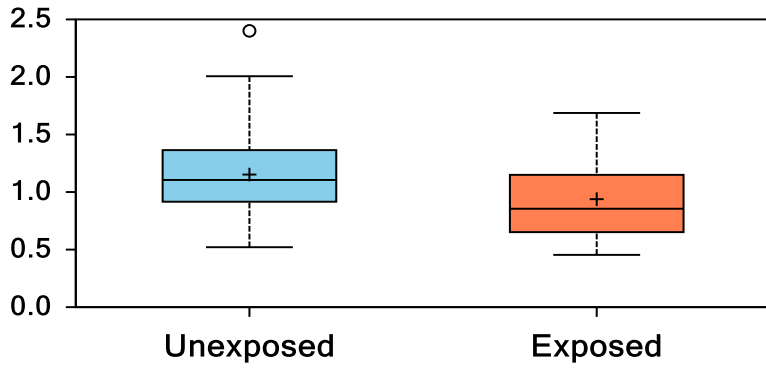

X - 11837

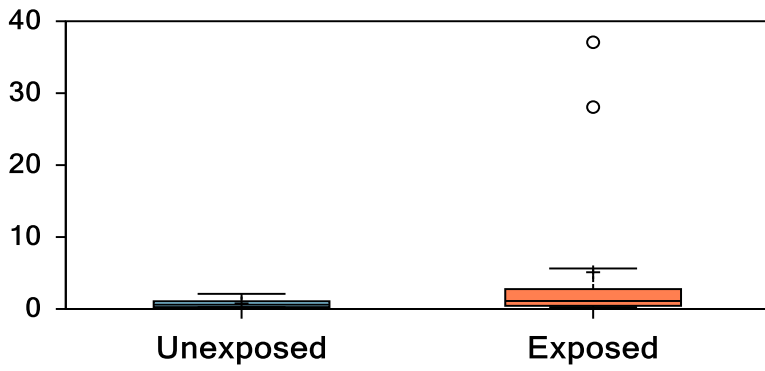

X - 11845

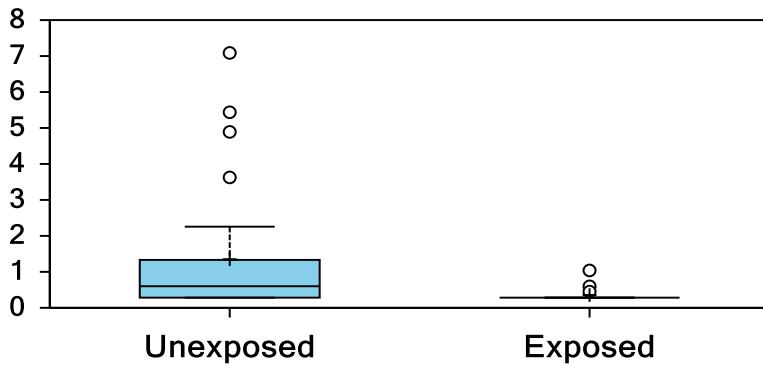

X - 11850

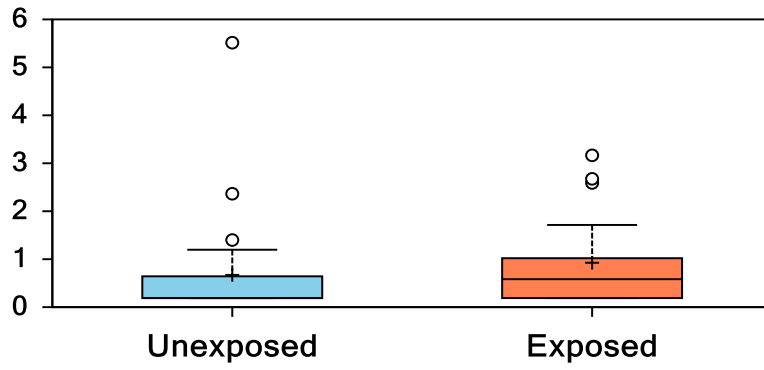

X - 11861

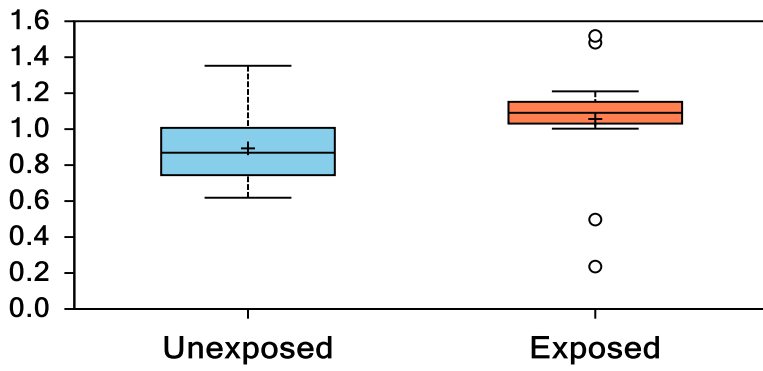

X - 11880

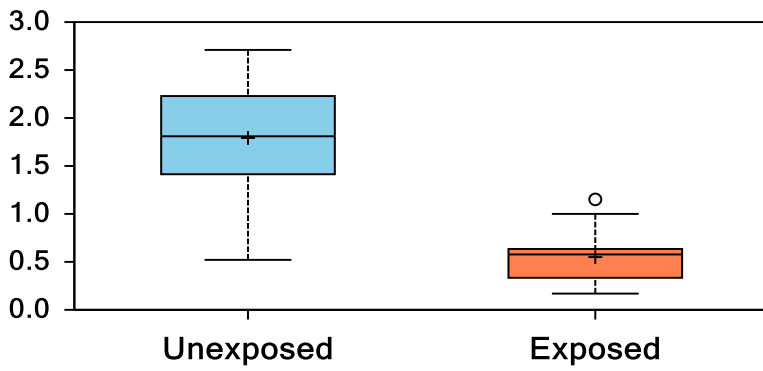

X - 11949

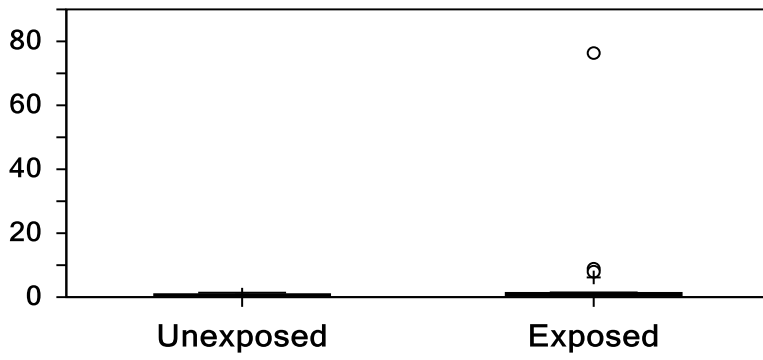

X - 12038

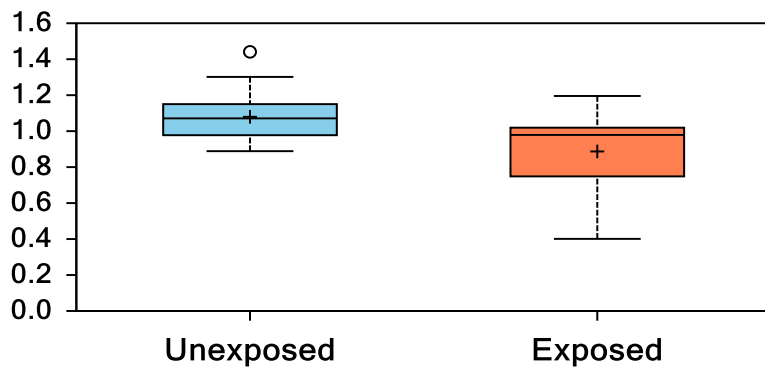

X - 12051

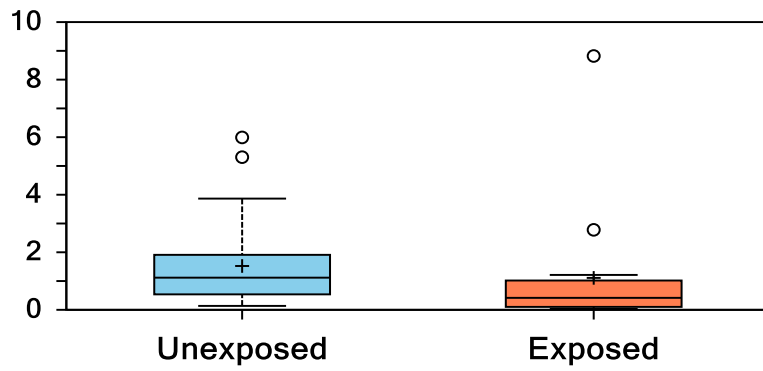

X - 12092

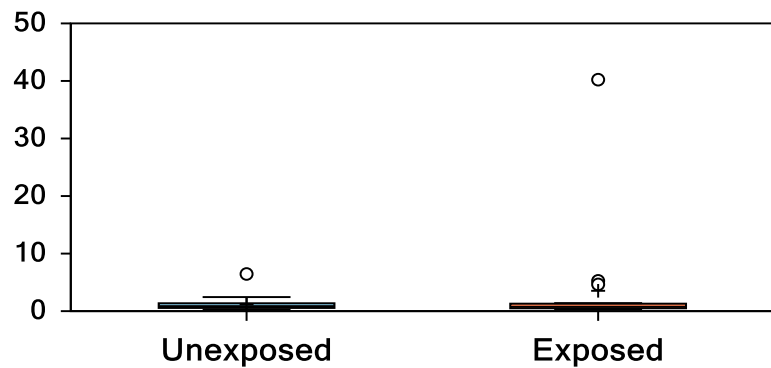

X - 12096

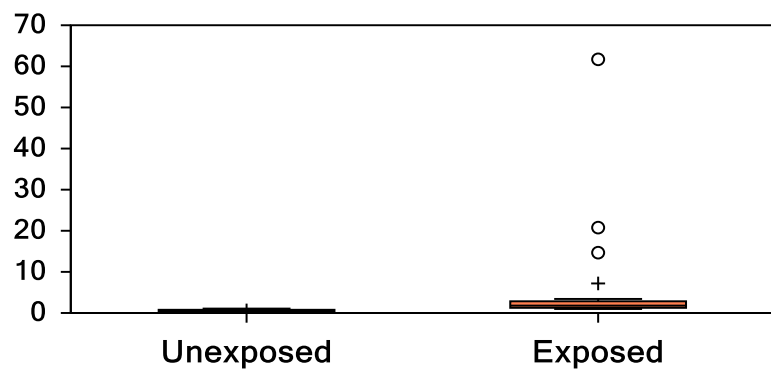

X - 12101

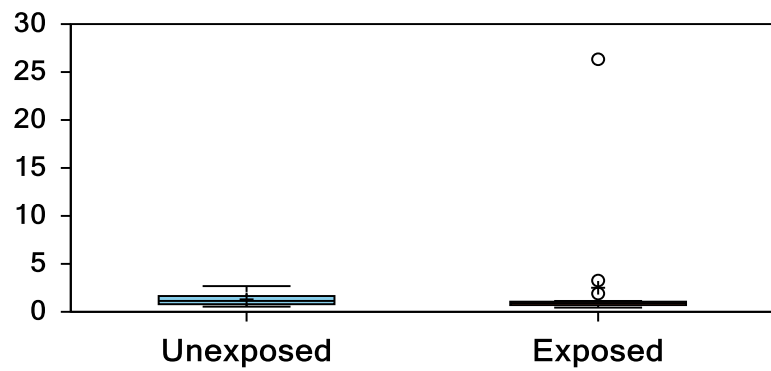

X - 12112

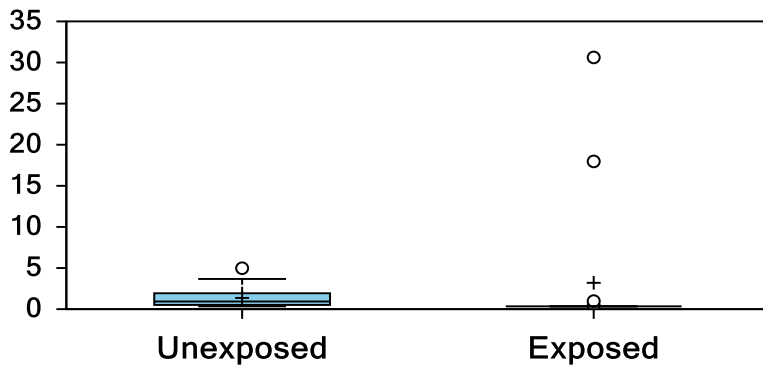

X - 12117

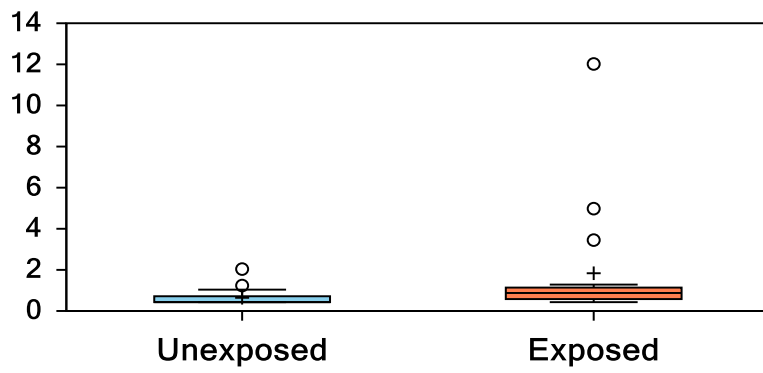

X - 12123

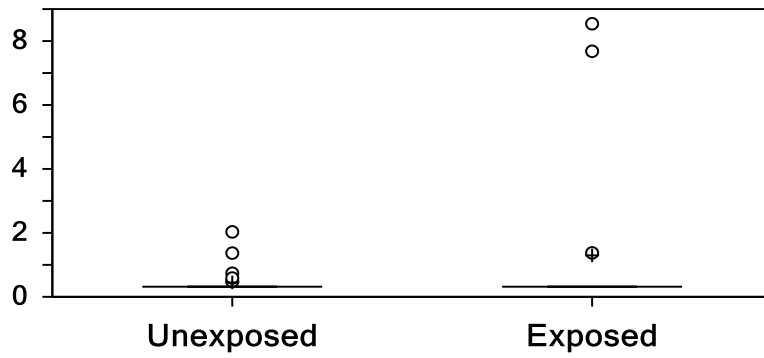



X - 12131

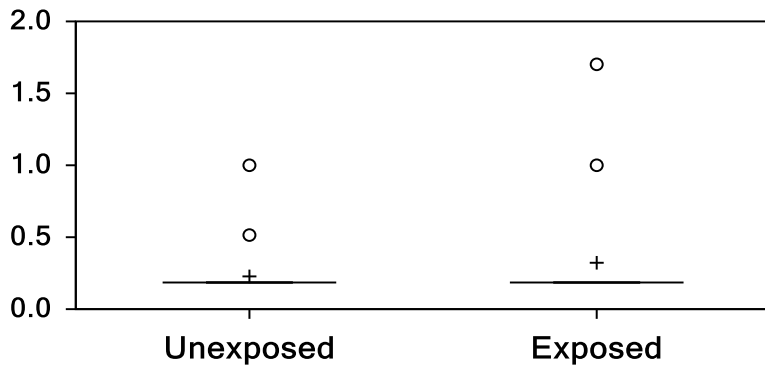

X - 12173

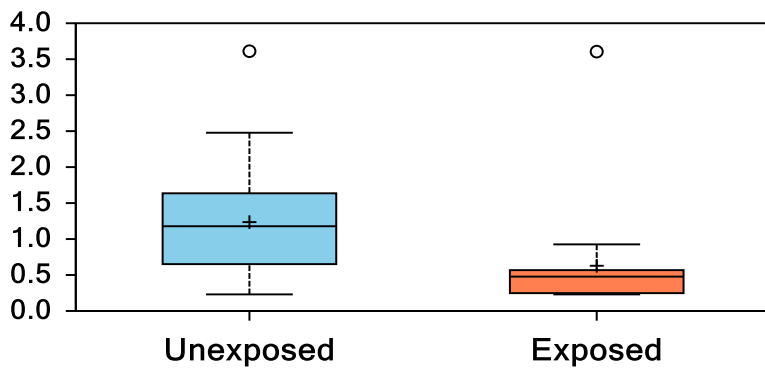

X - 12199

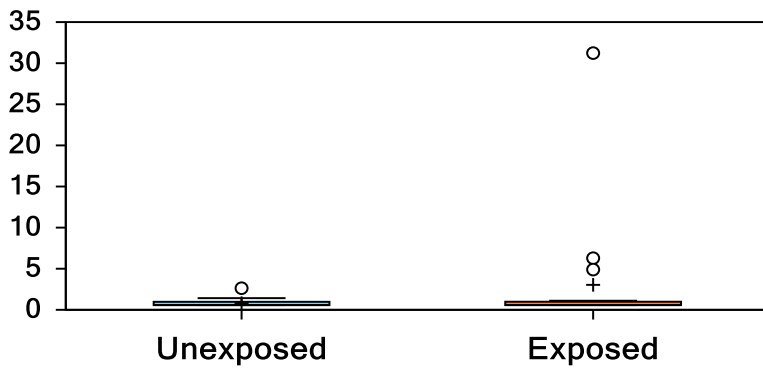

X - 12212

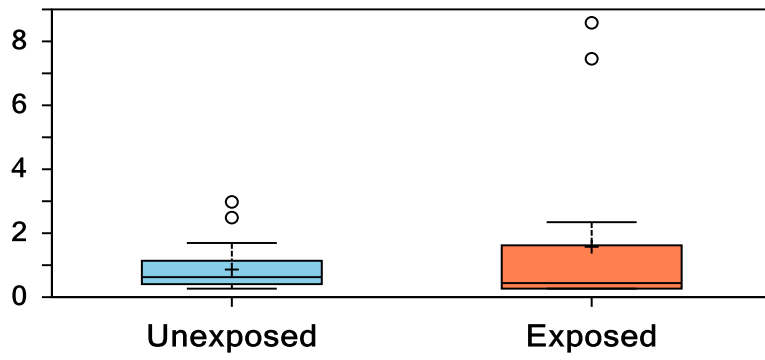

X - 12231

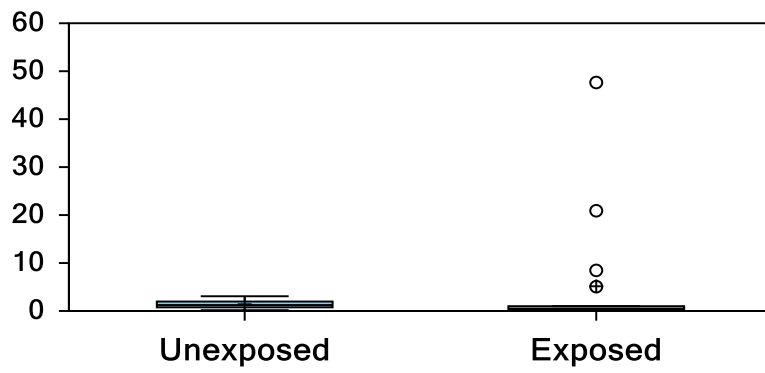

X - 12244

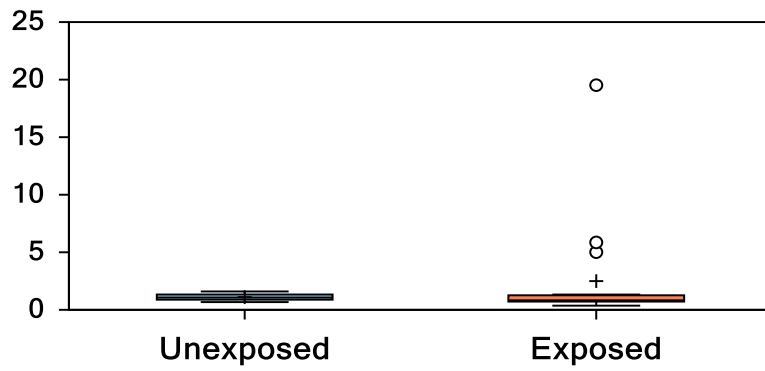

X - 12267

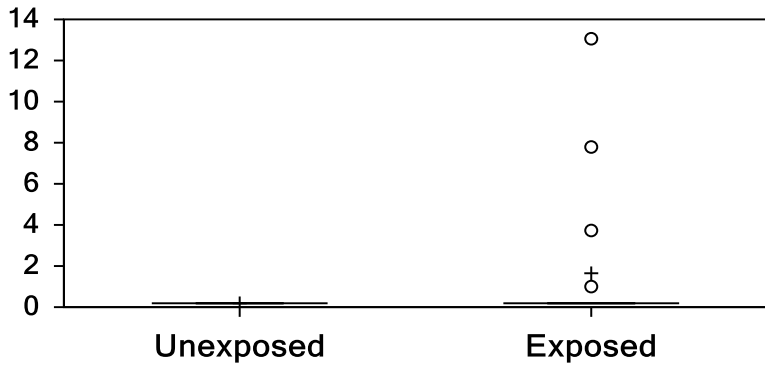

X - 12331

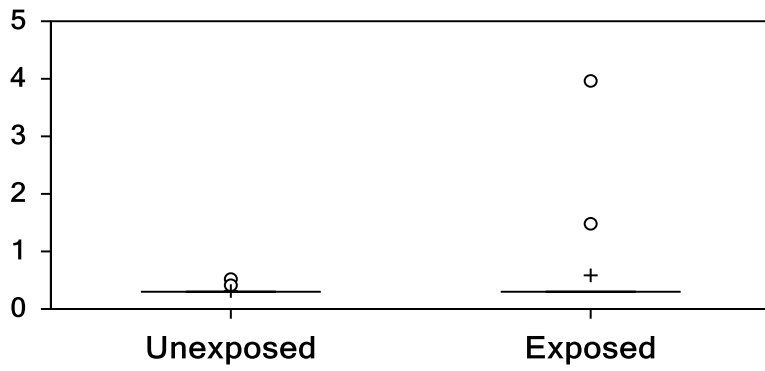

X - 12358

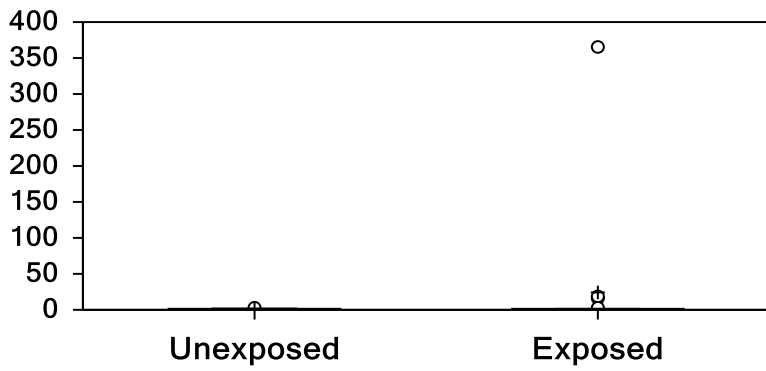

X - 12411

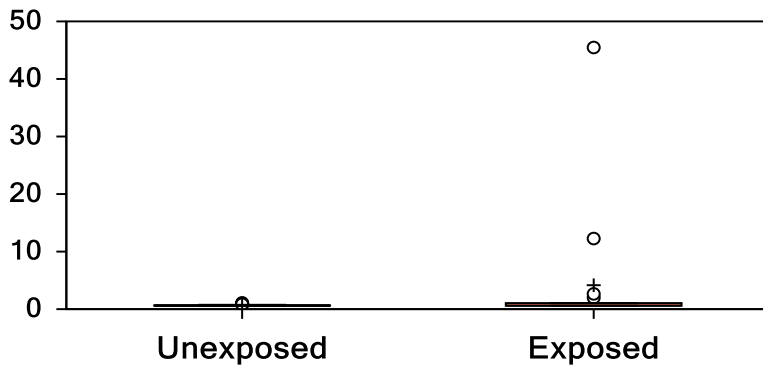

X - 12450

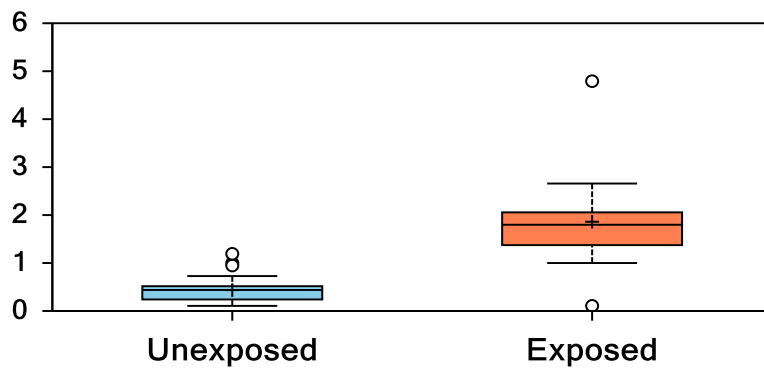

X - 12511

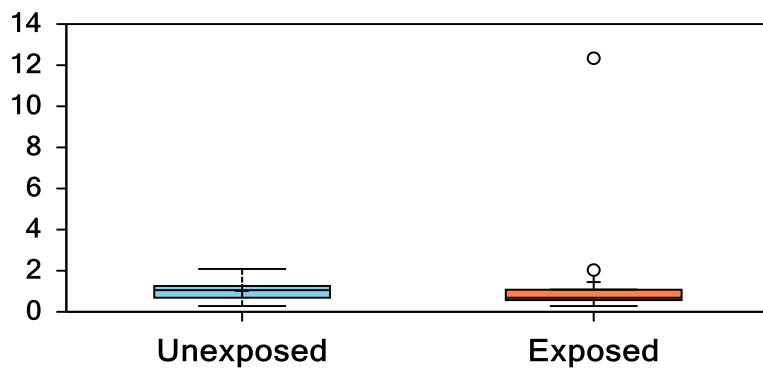

X - 12565

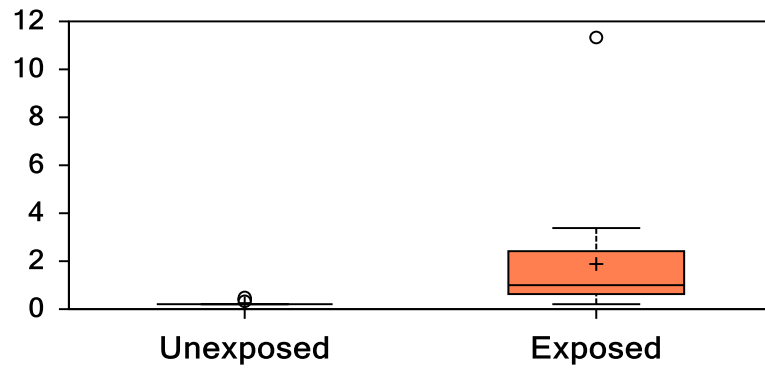

X - 12627

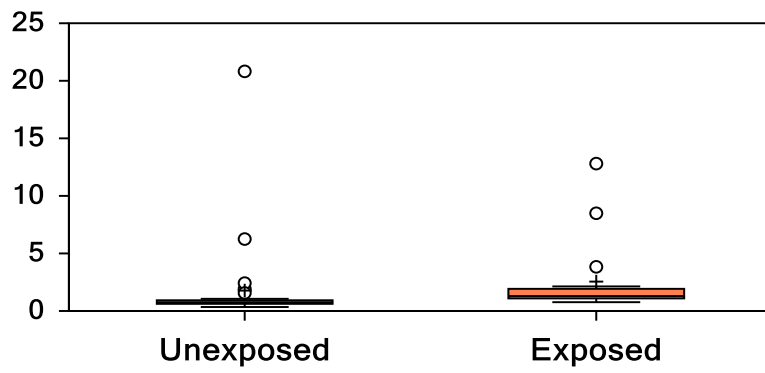

X - 12645

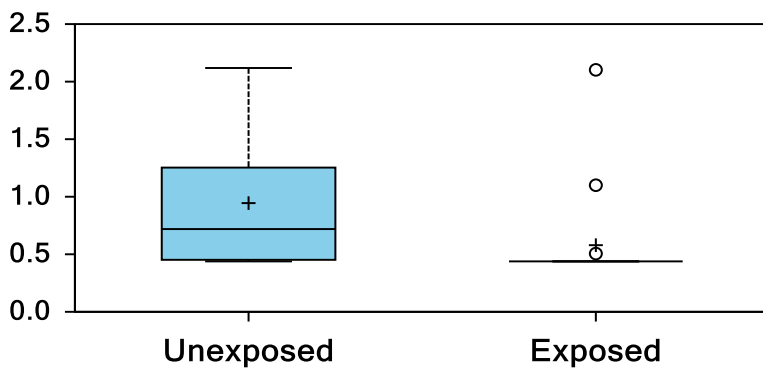

X - 12690

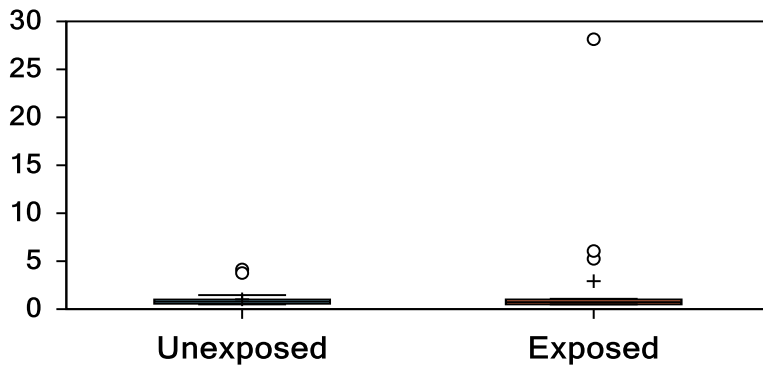

X - 12705

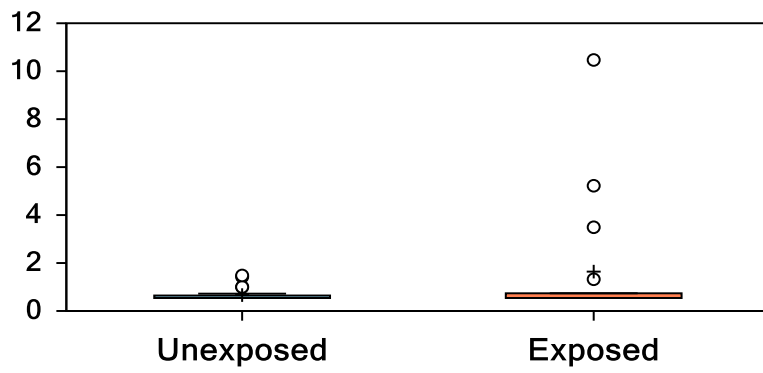

X - 12718

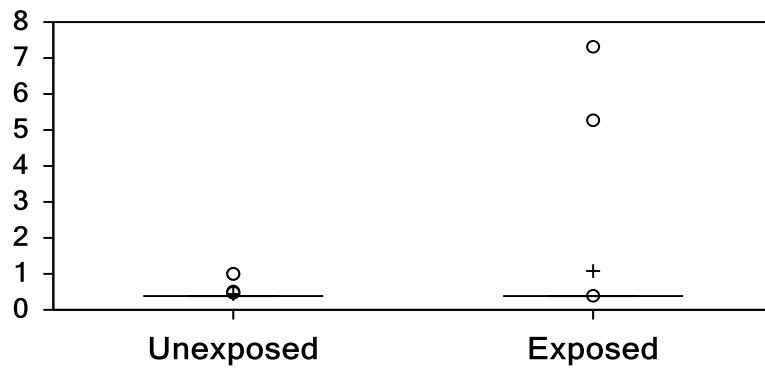

X - 12738

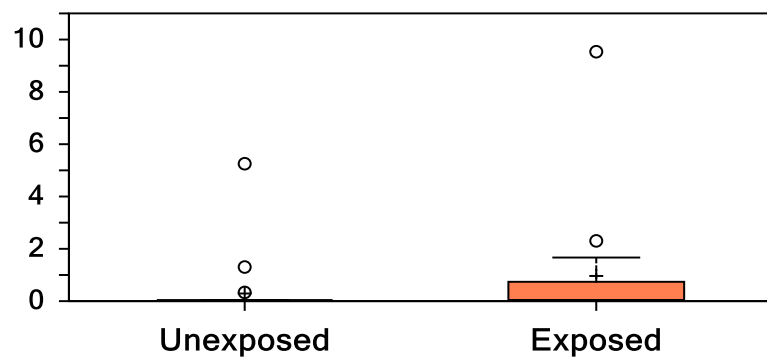

X - 12742

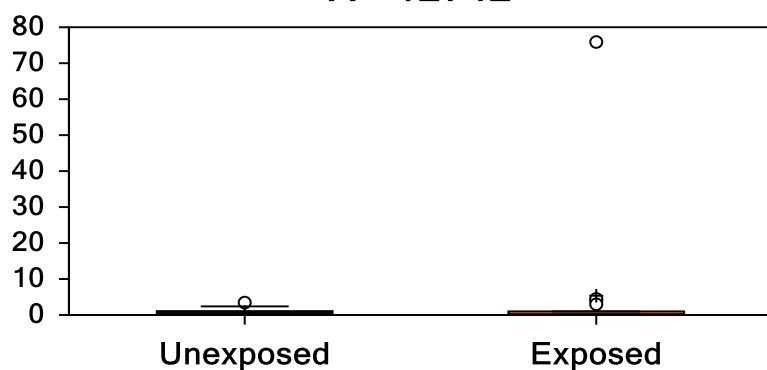

X - 12748

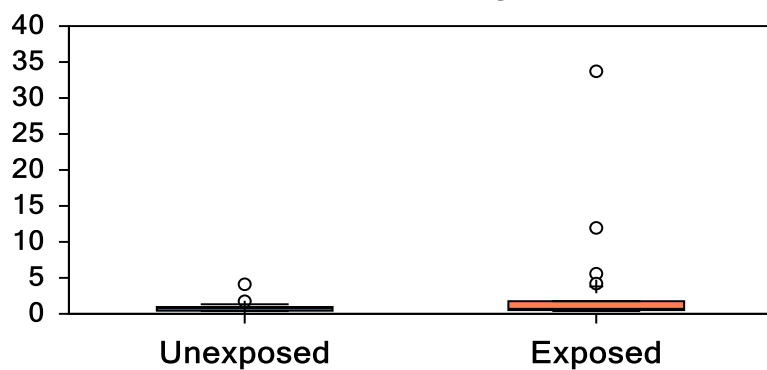

X - 12768

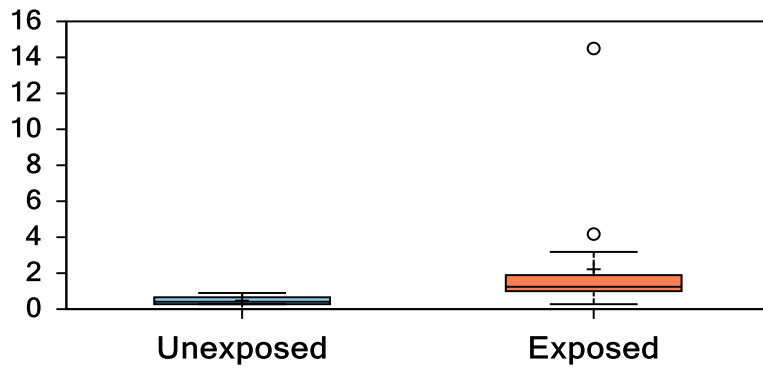

X - 12802

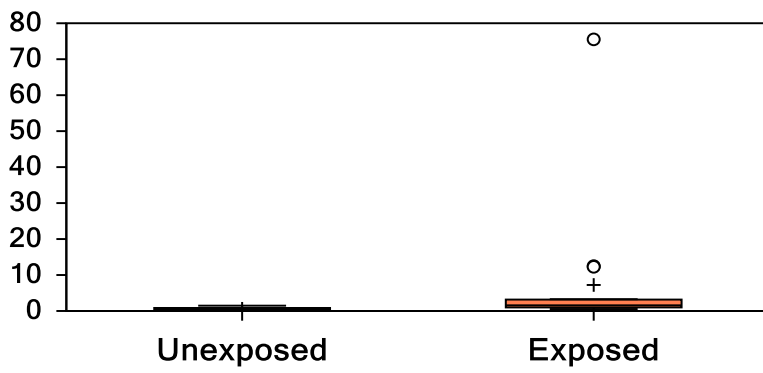

X - 12814

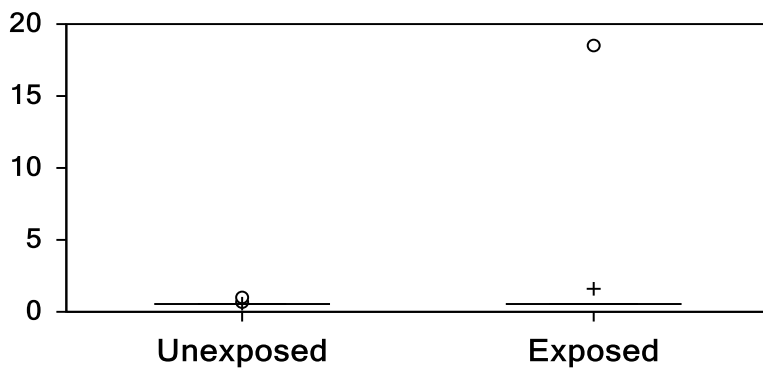



X - 12822

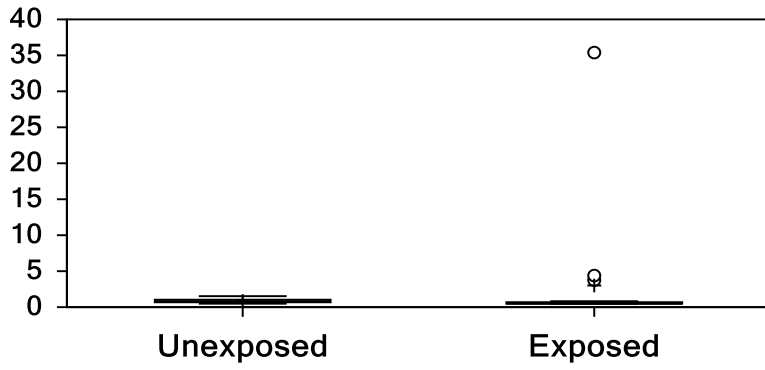

X - 12830

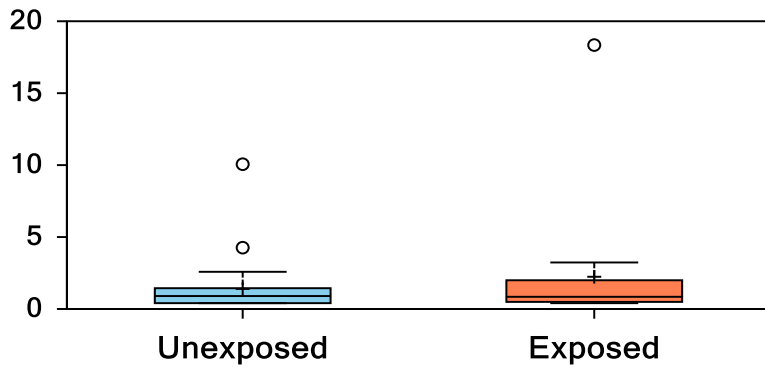

X - 12837

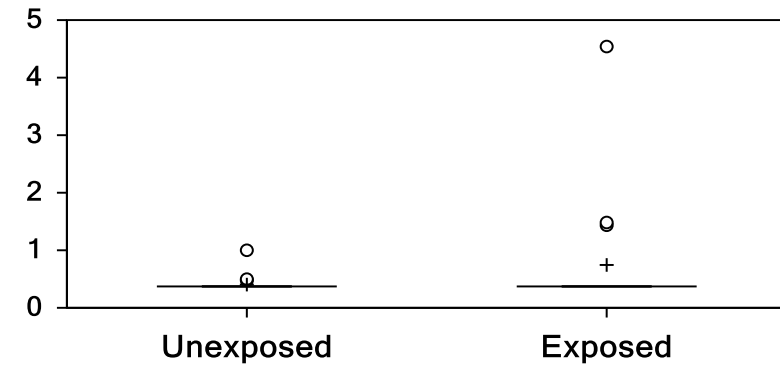

X - 12847

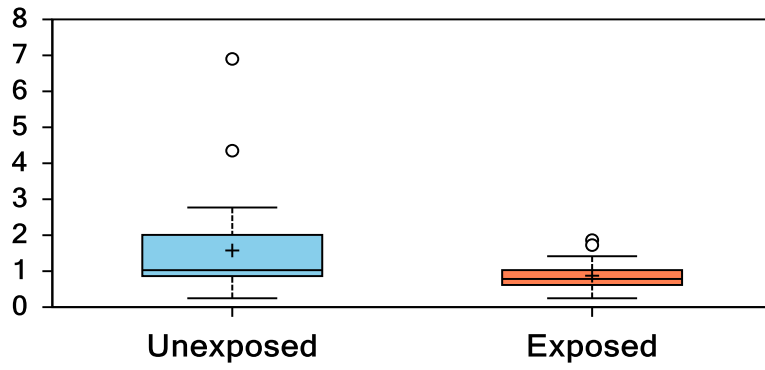

X - 12851

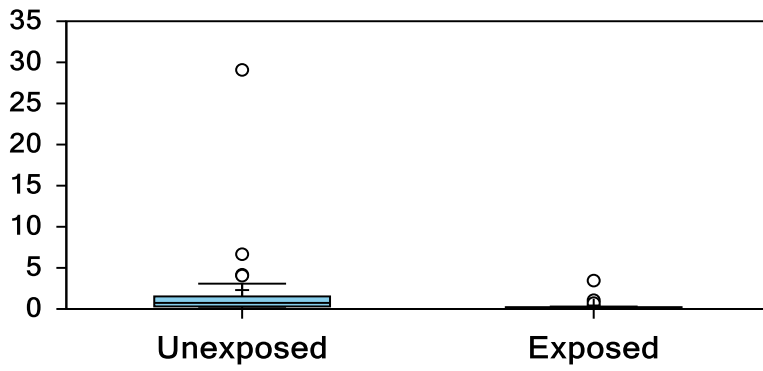

X - 12878

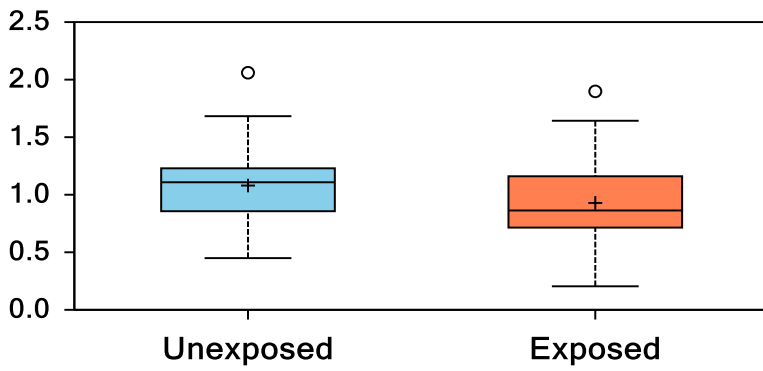

X - 13007

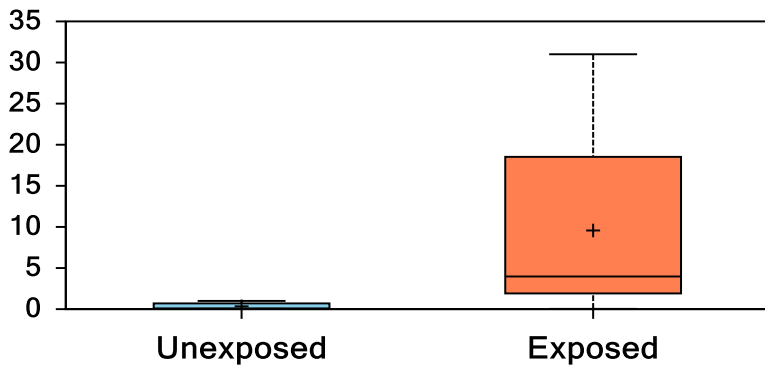

X - 13215

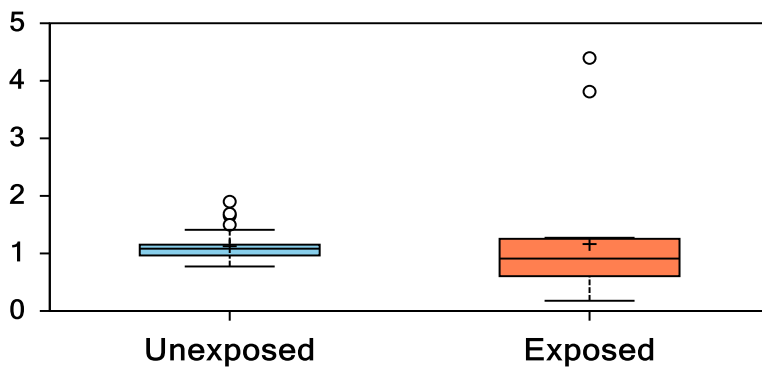

X - 13424

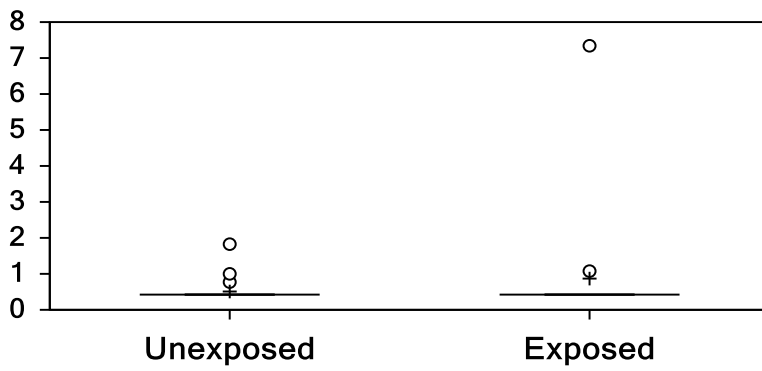

X - 13452

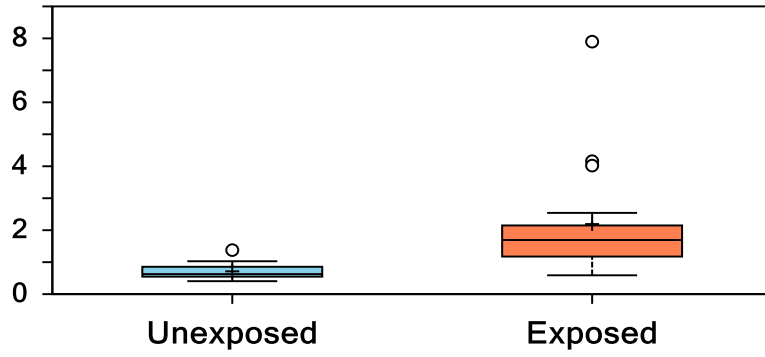

X - 13529

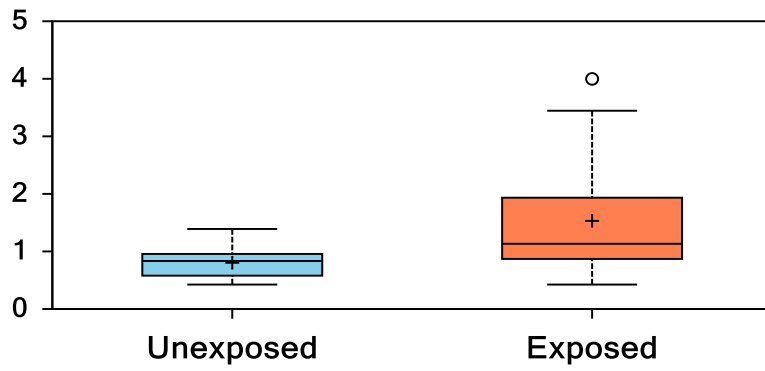

X - 13658

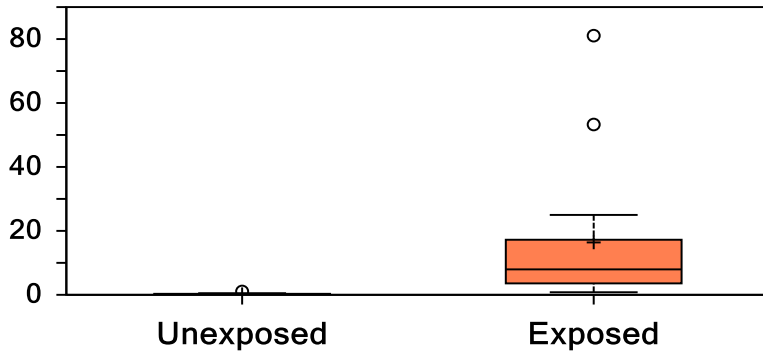

X - 13688

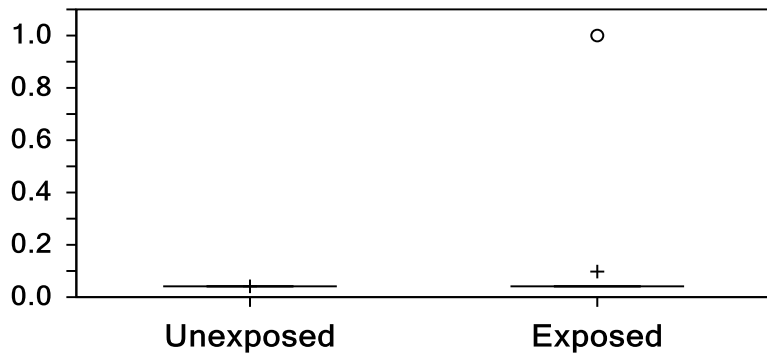

X - 13706

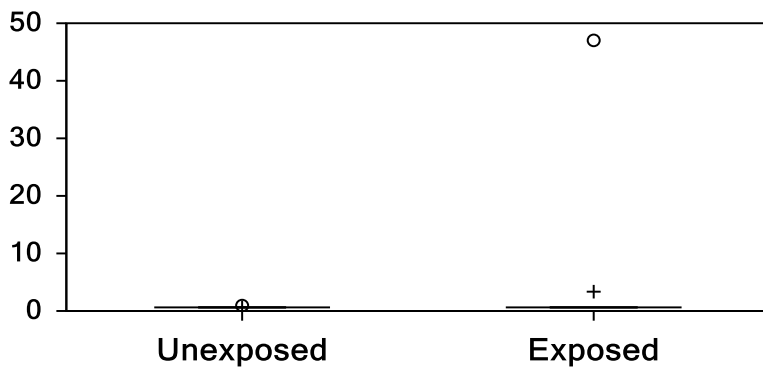

X - 13727

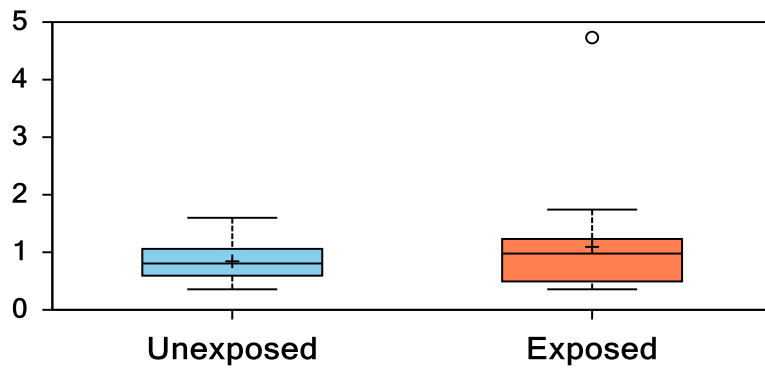

X - 13737

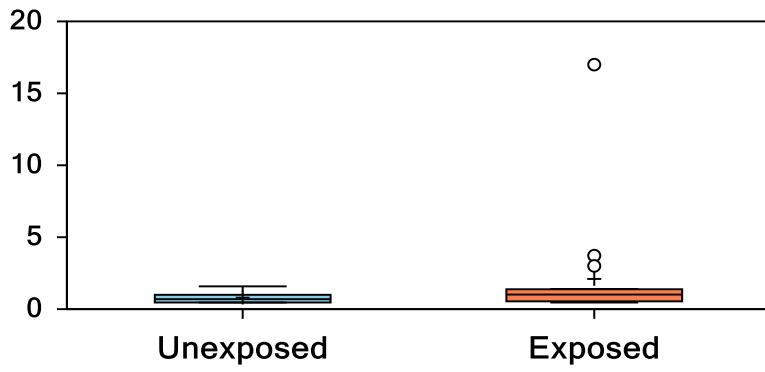

X - 13837

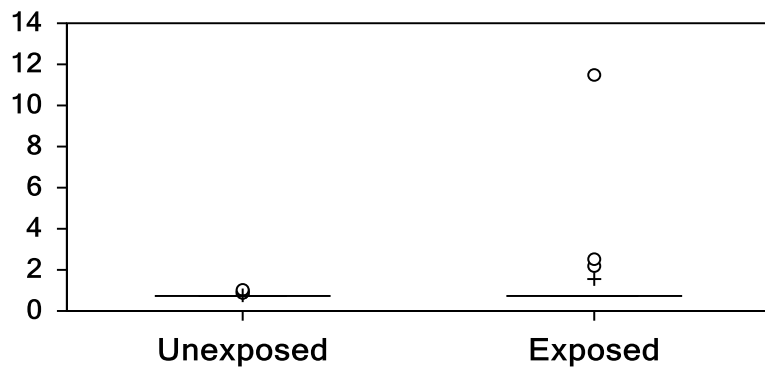

X - 13848

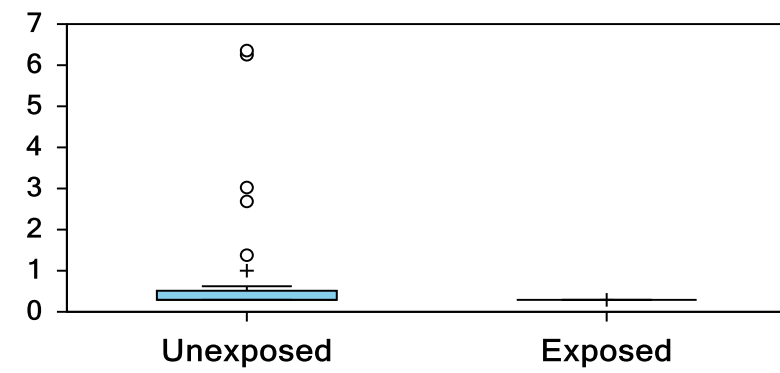

X - 13871

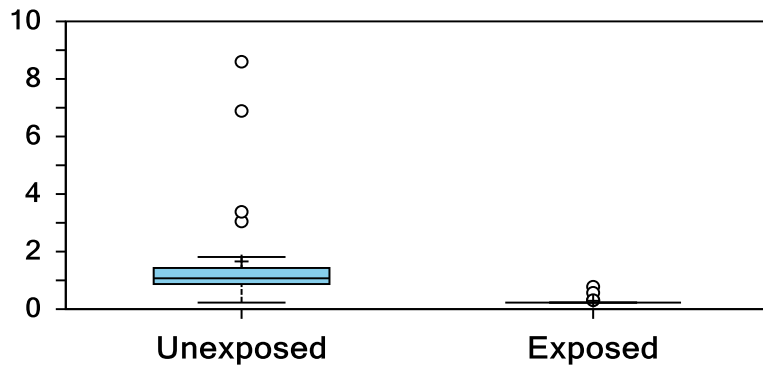

X - 14057

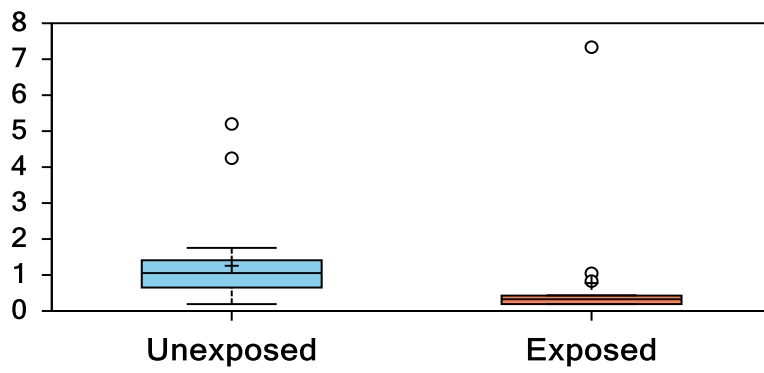

X - 14086

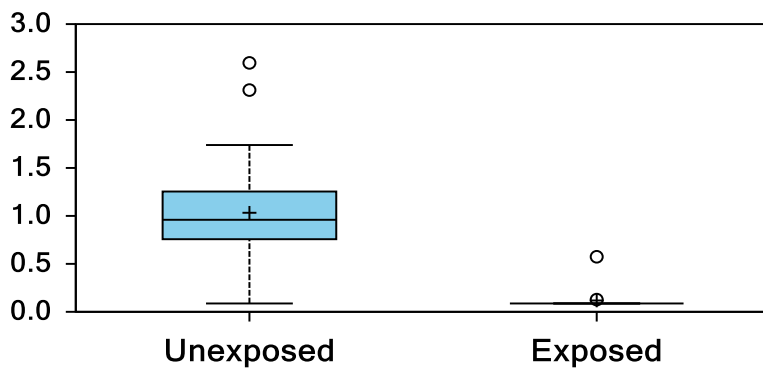

X - 14095

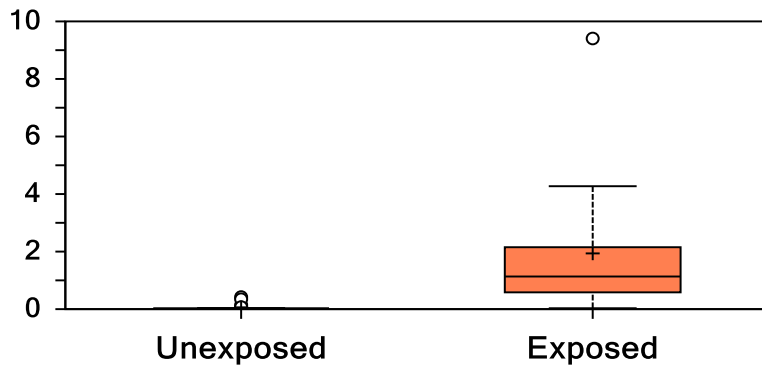

X - 14099

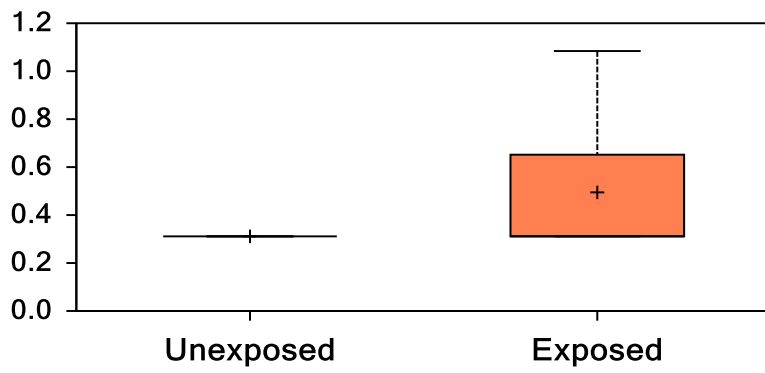

X - 14132

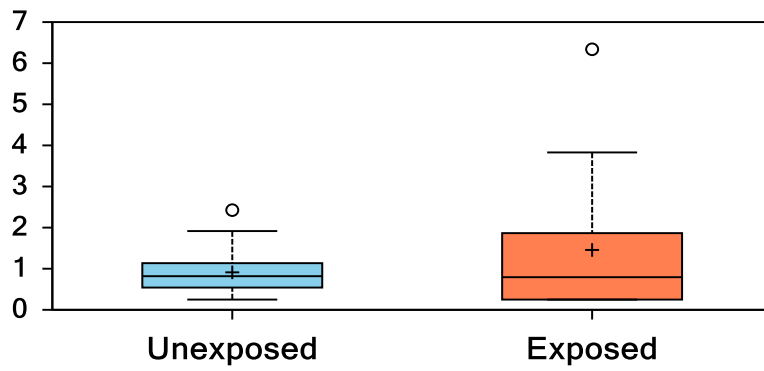



X - 14147

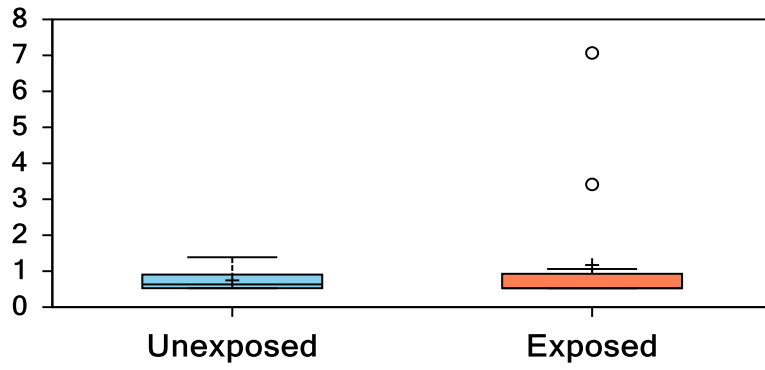

X - 14161

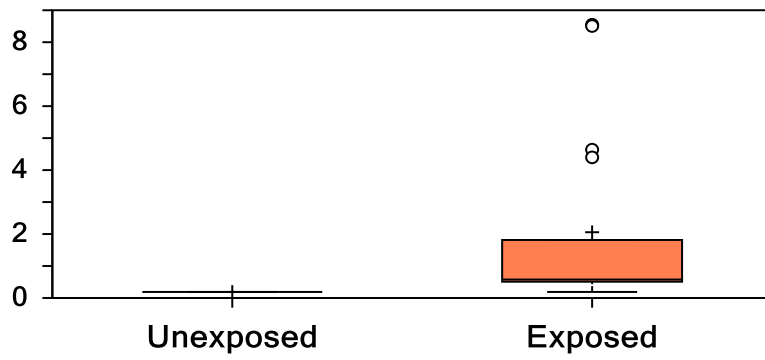

X - 14193

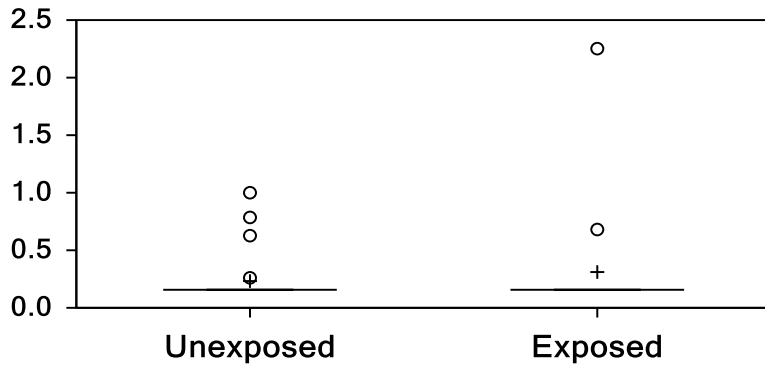

X - 14203

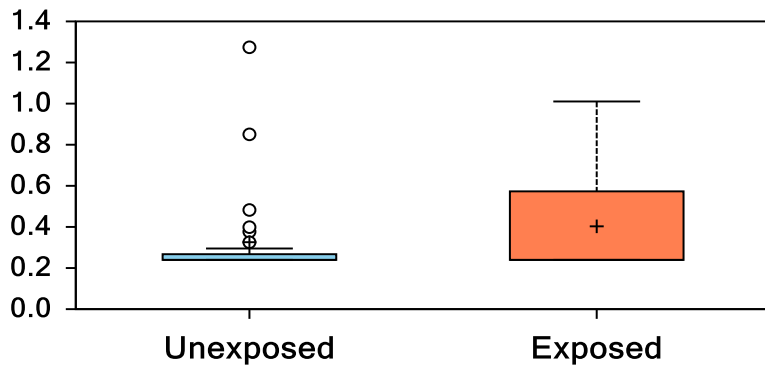

X - 14234

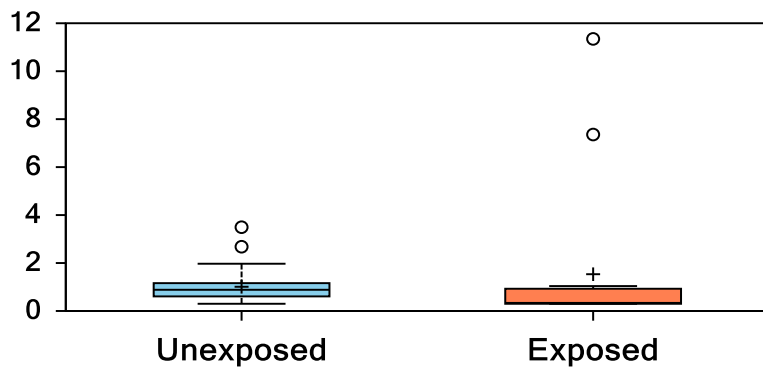

X - 14272

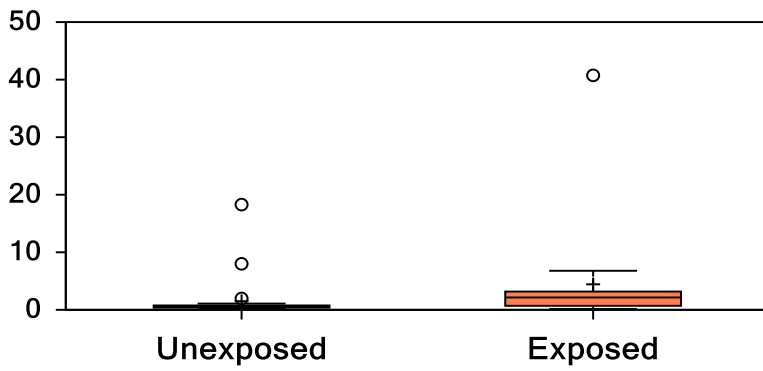

X - 14314

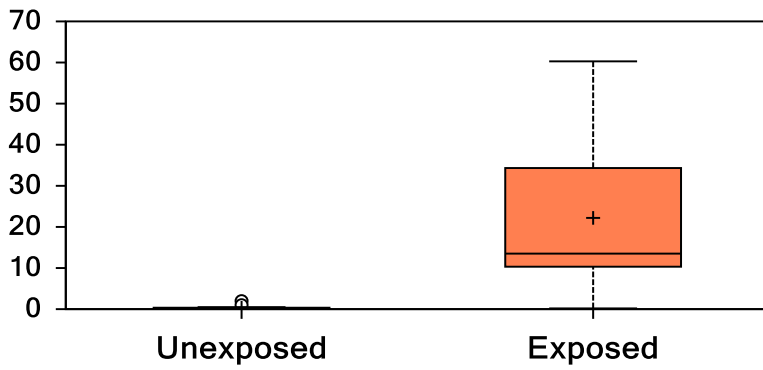

X - 14363

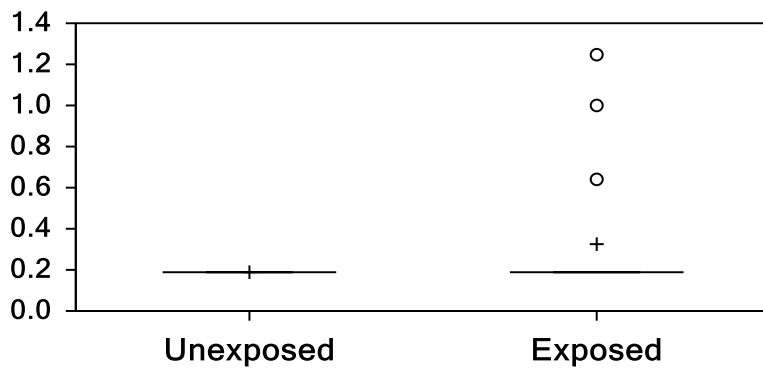

X - 14411

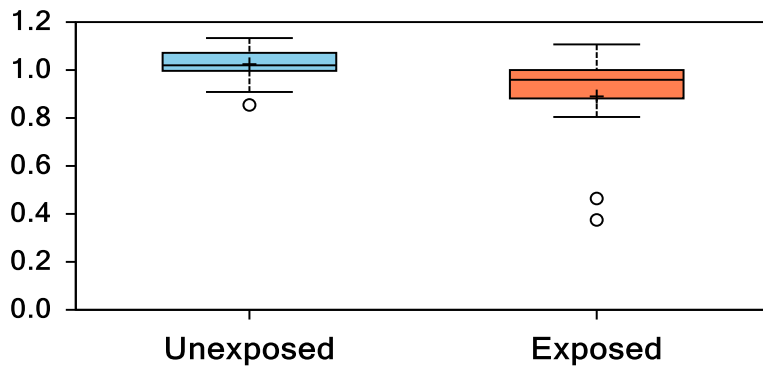

X - 14458

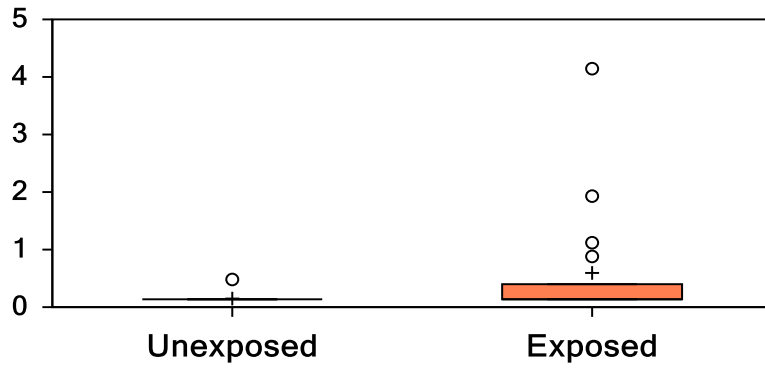

X - 14497

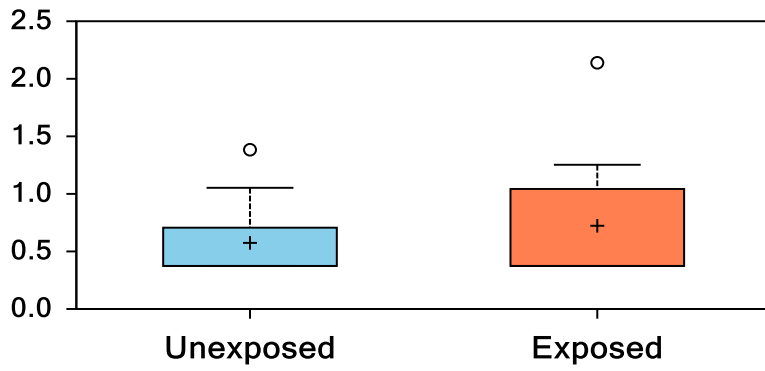

X - 14588

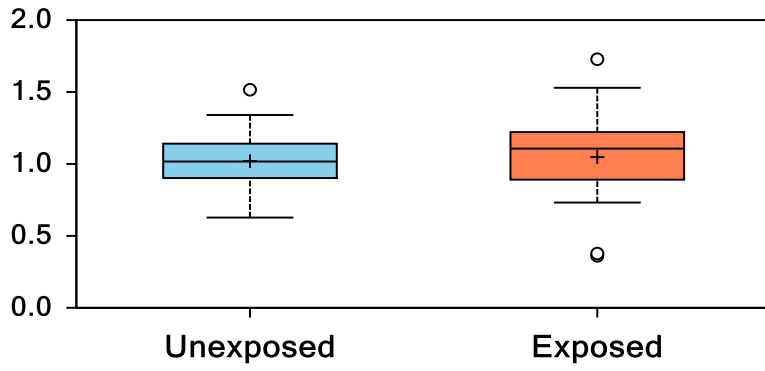

X - 14626

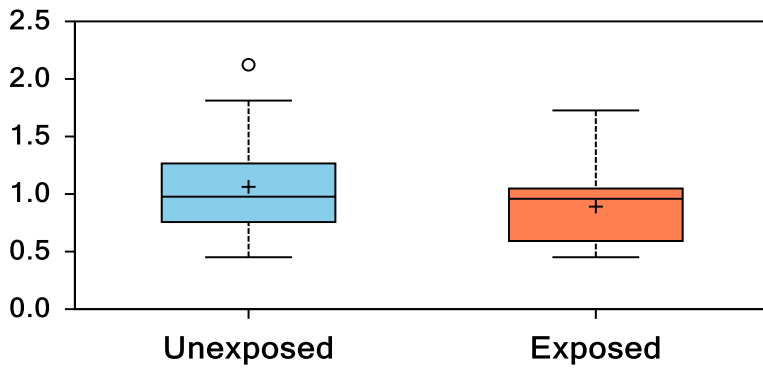

X - 14663

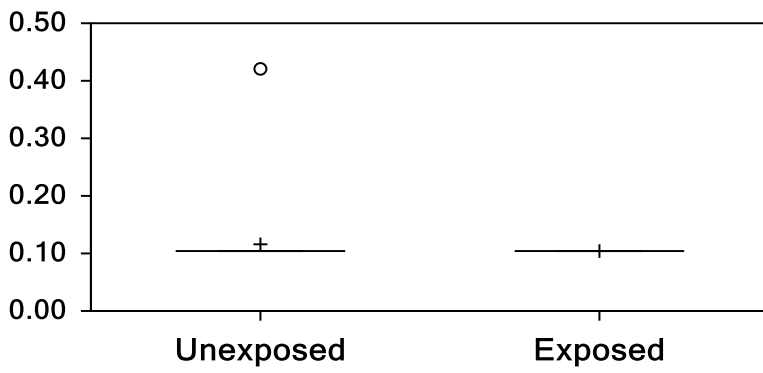

X - 14908

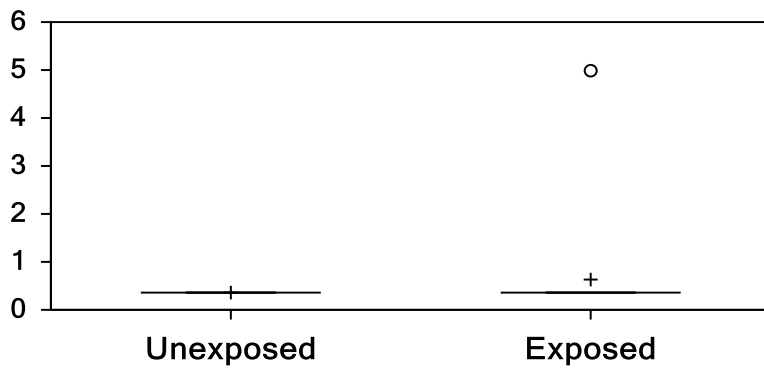

X - 15168

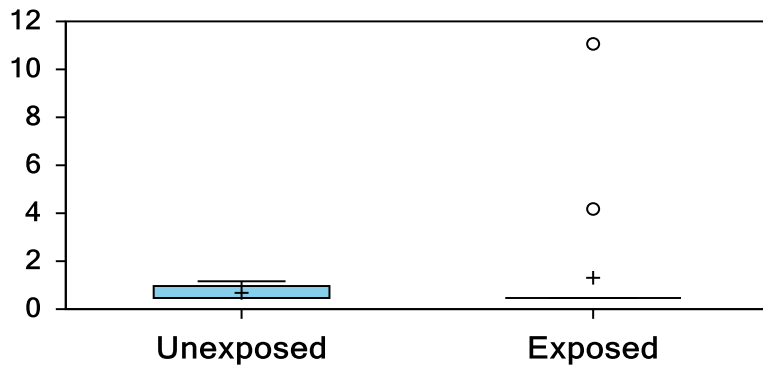

X - 15301

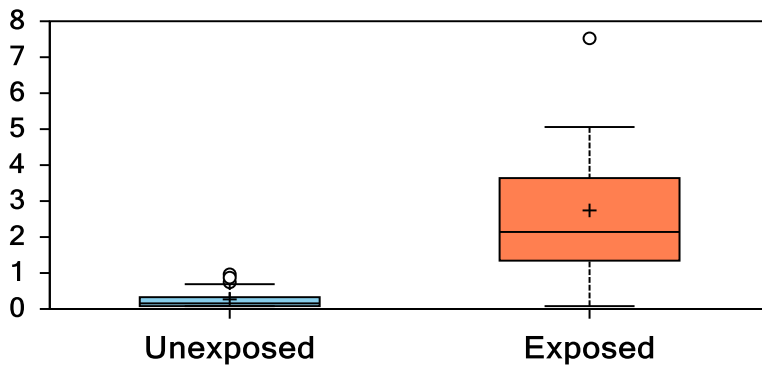

X - 15461

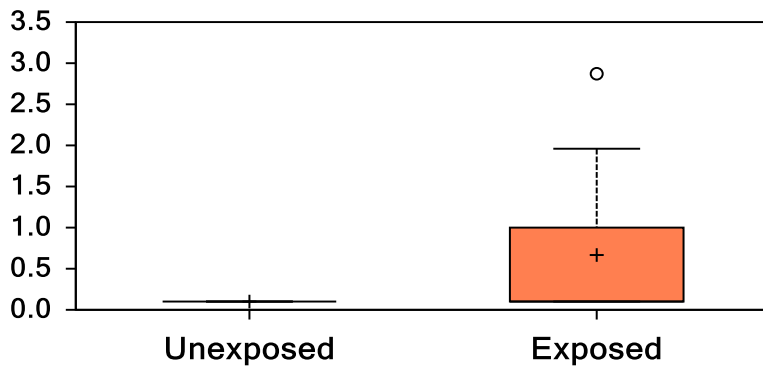

X - 15484

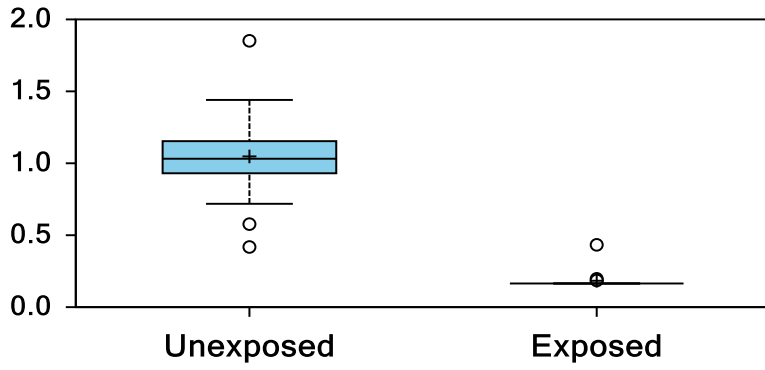

X - 15523

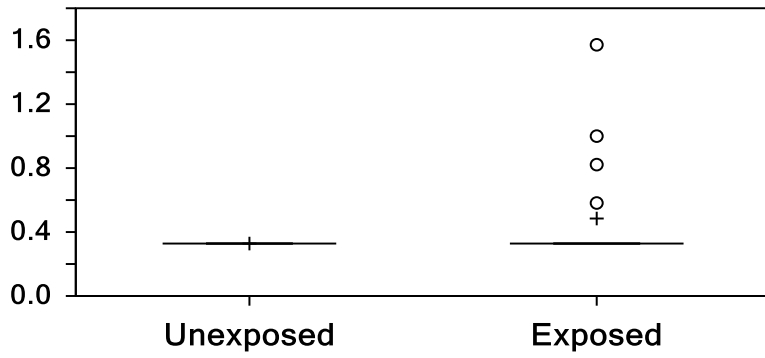

X - 15562

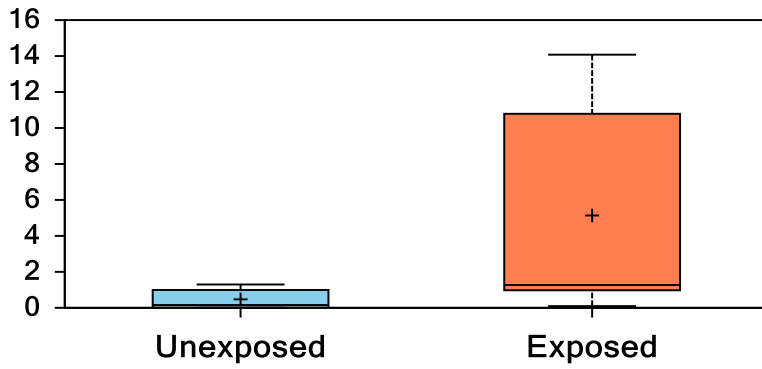

X - 15634

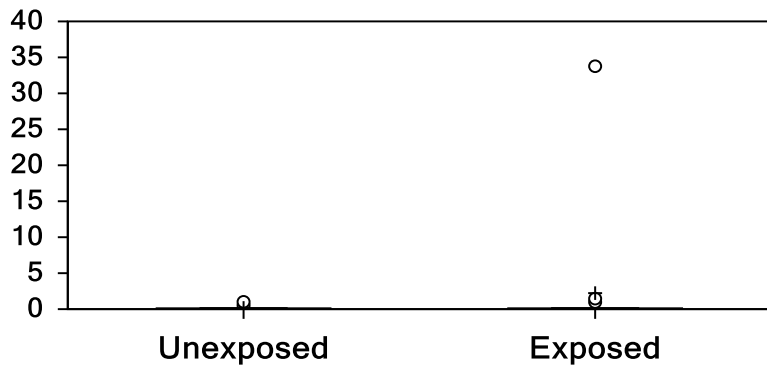

X - 15664

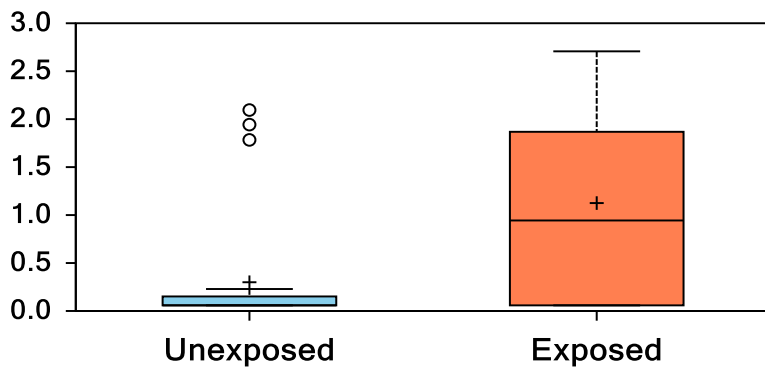

X - 15680

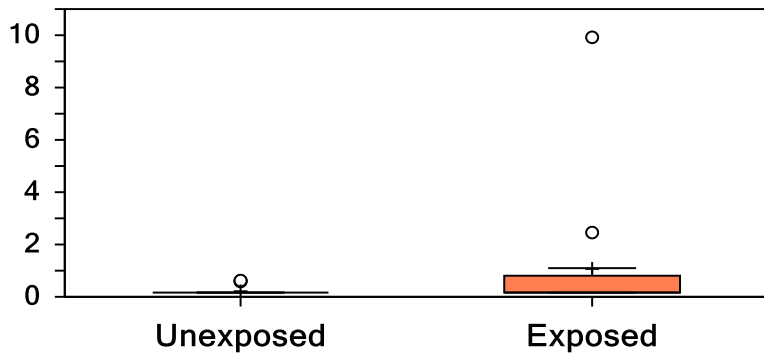



X - 15708

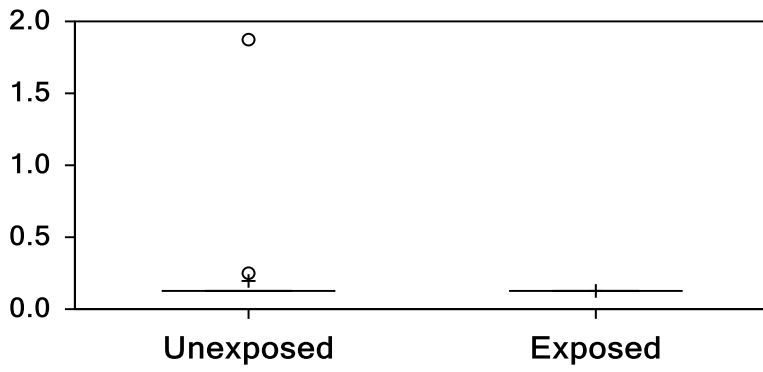

X - 15731

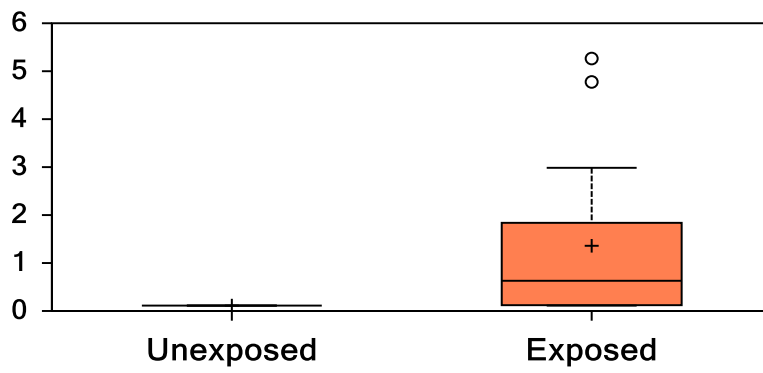

X - 15754

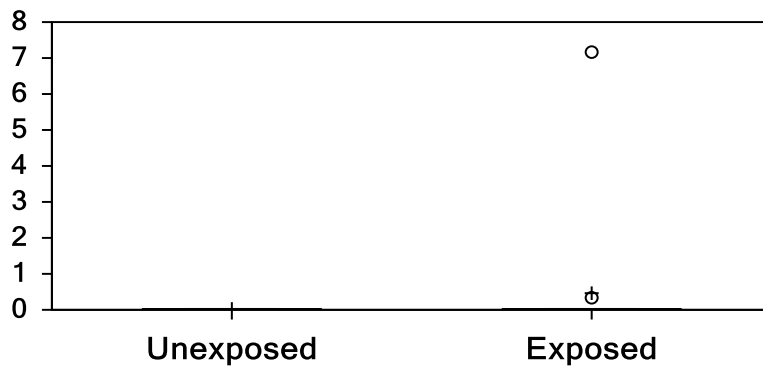

X - 15861

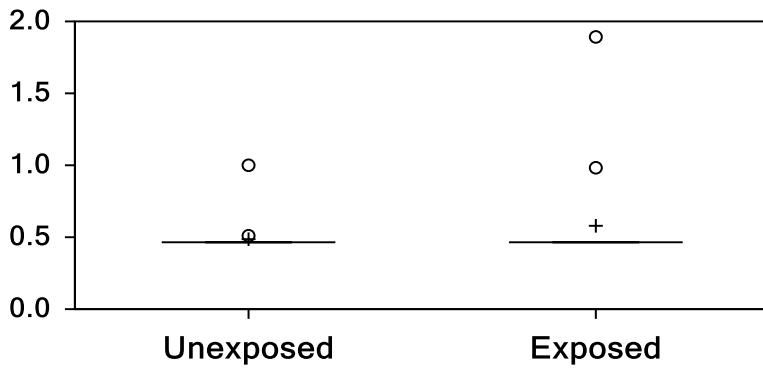

X - 16063

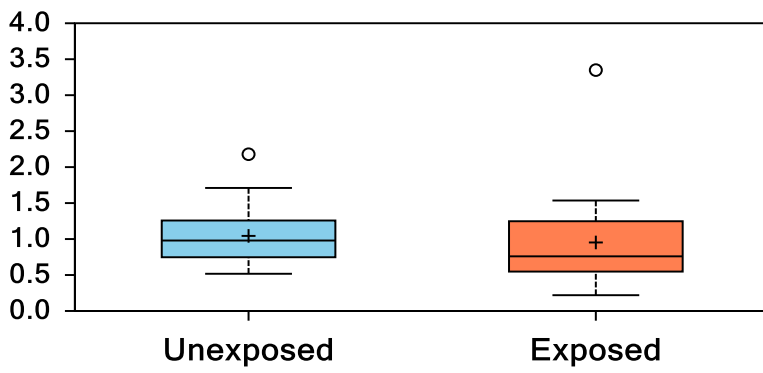

X - 16087

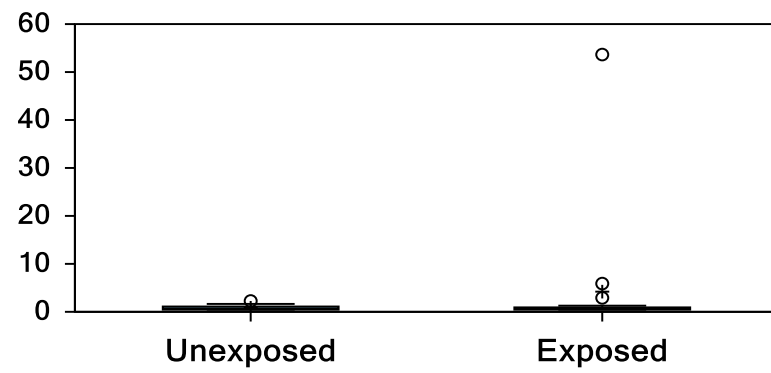

X - 16117

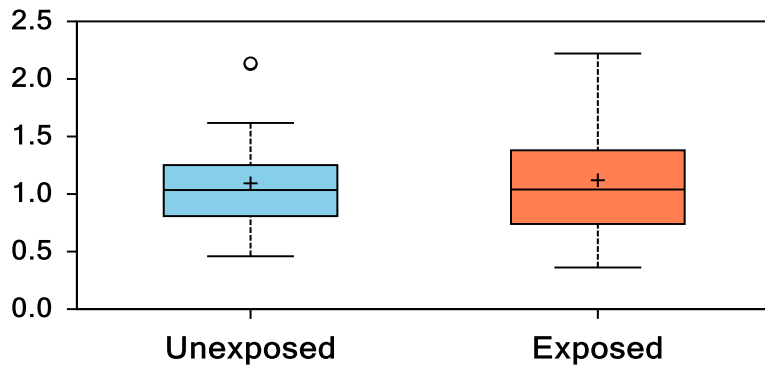

X - 16124

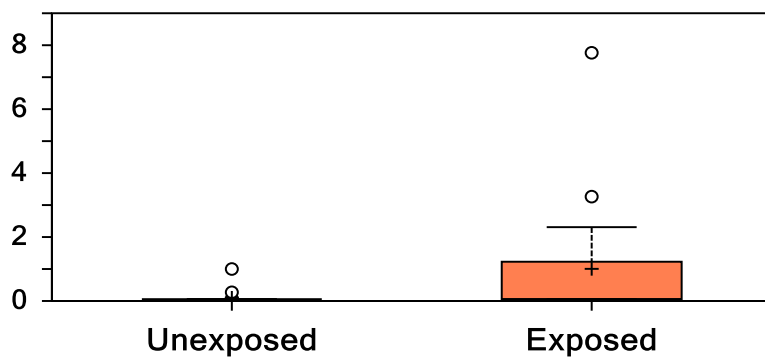

X - 16129

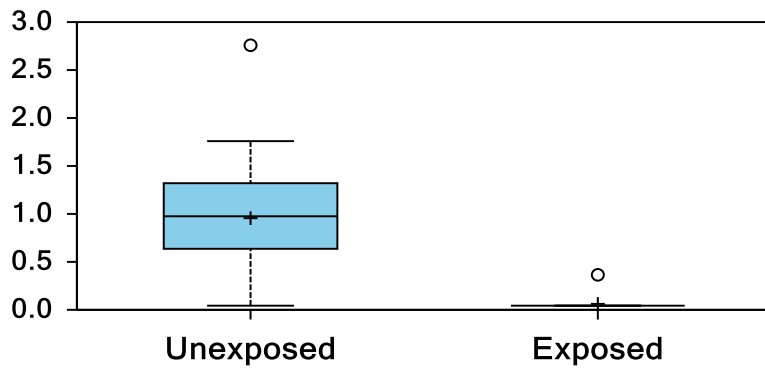

X - 16132

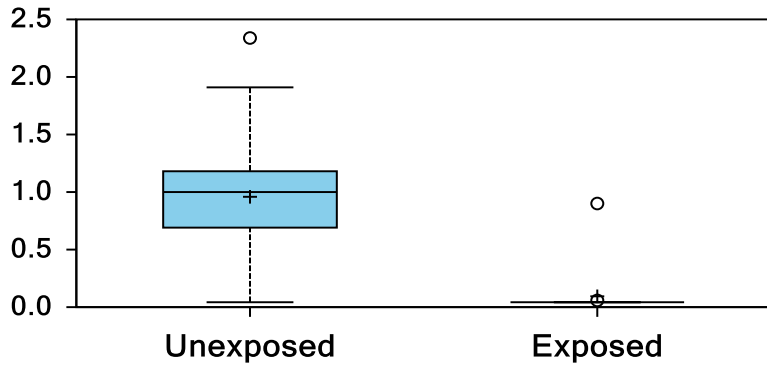

X - 16135

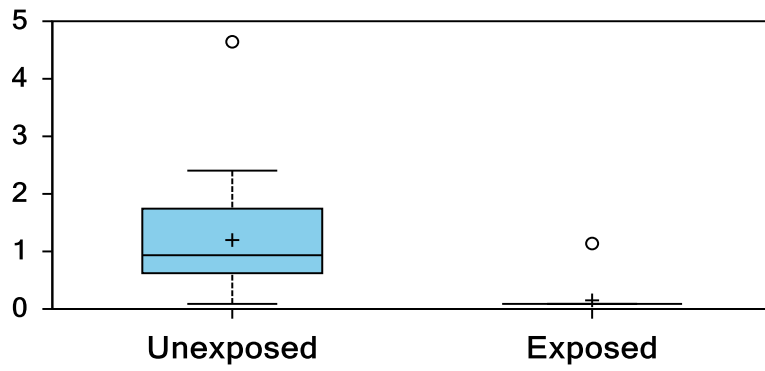

X - 16206

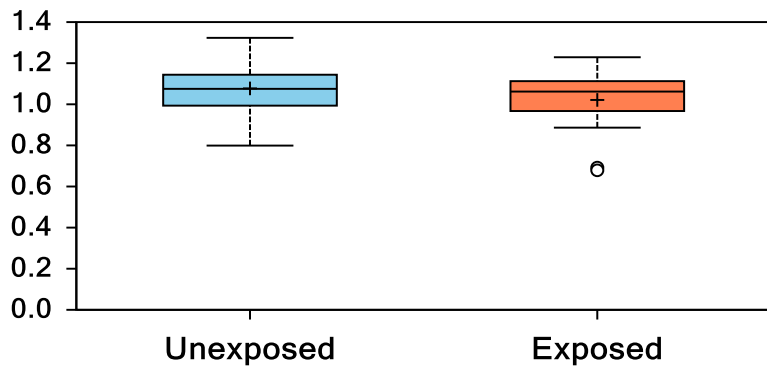

X - 16249

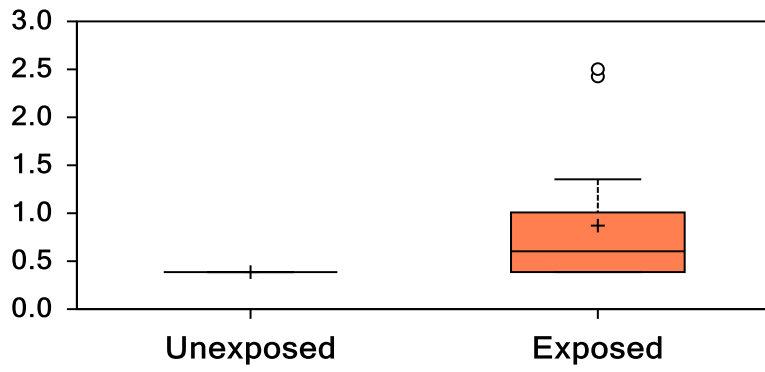

X - 16299

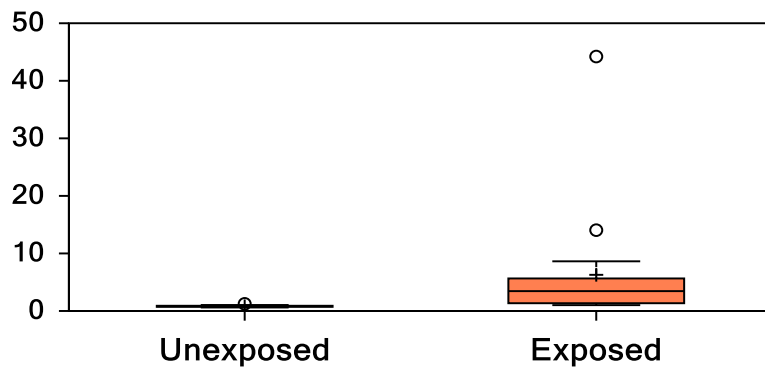

X - 16336

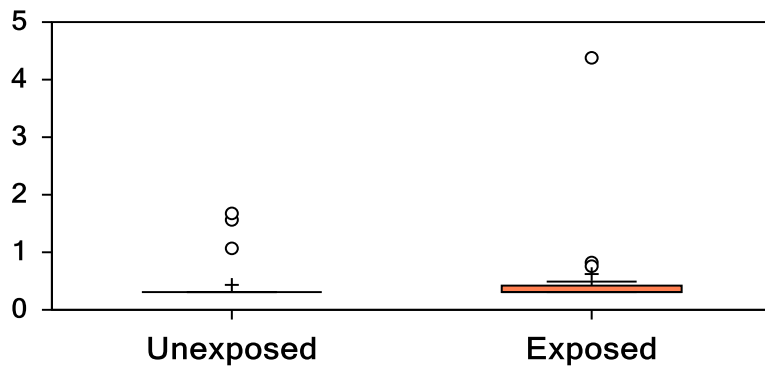

X - 16397

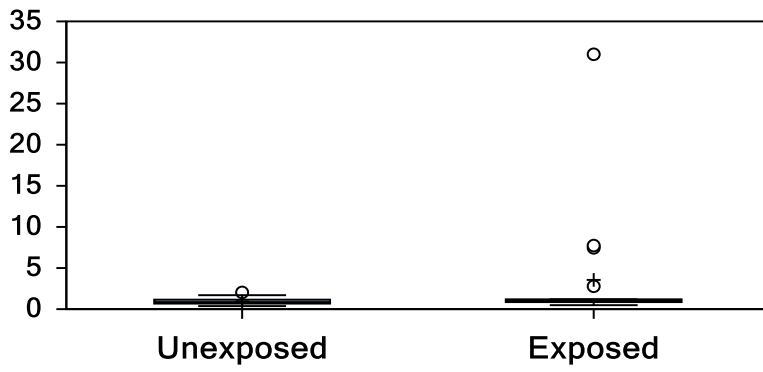

X - 16447

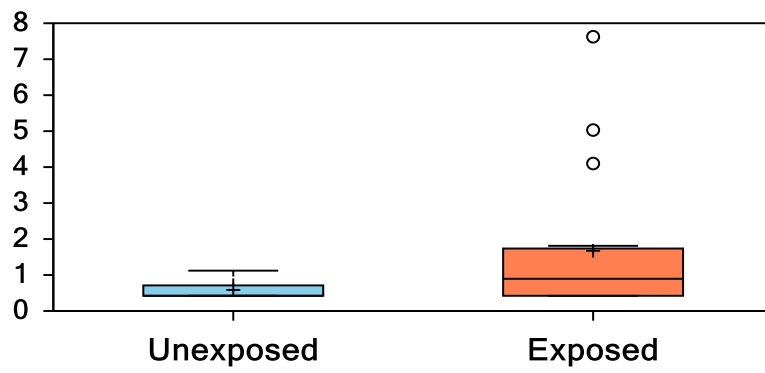

X - 16461

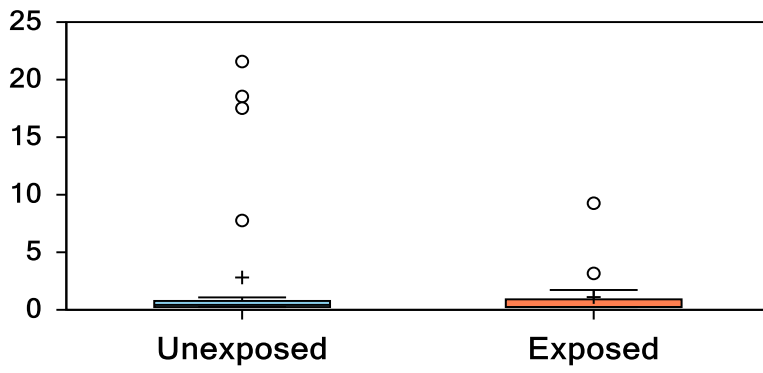

X - 16480

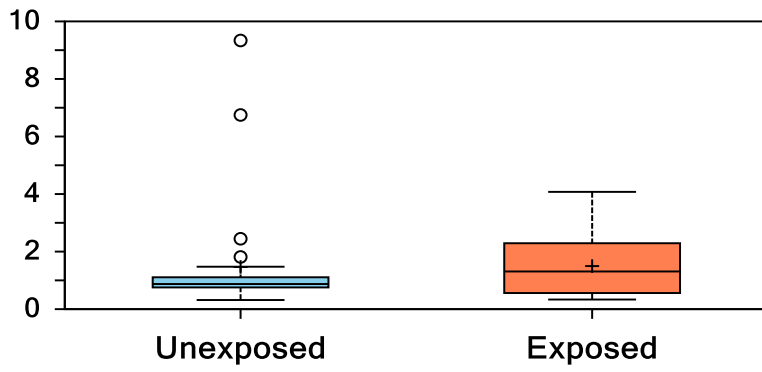

X - 16576

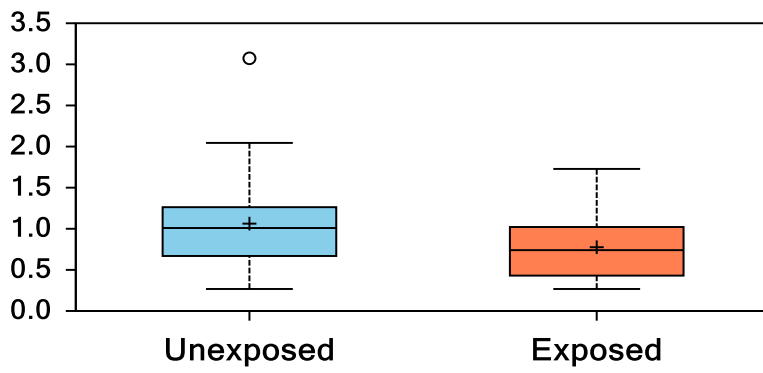

X - 16626

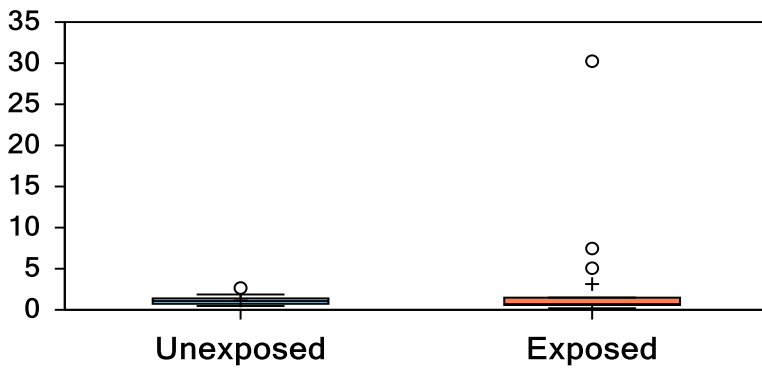

X - 16653

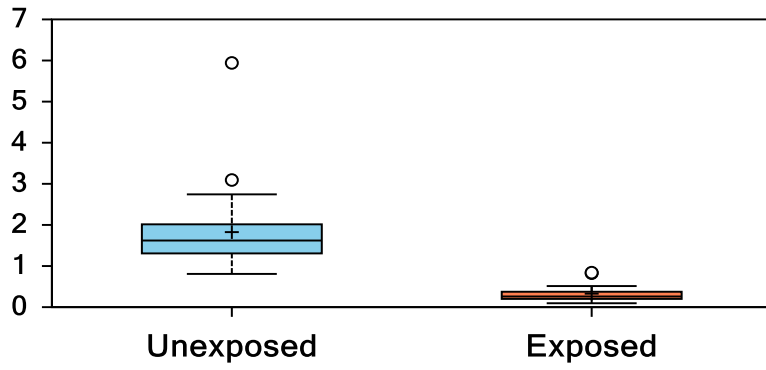

X - 16786

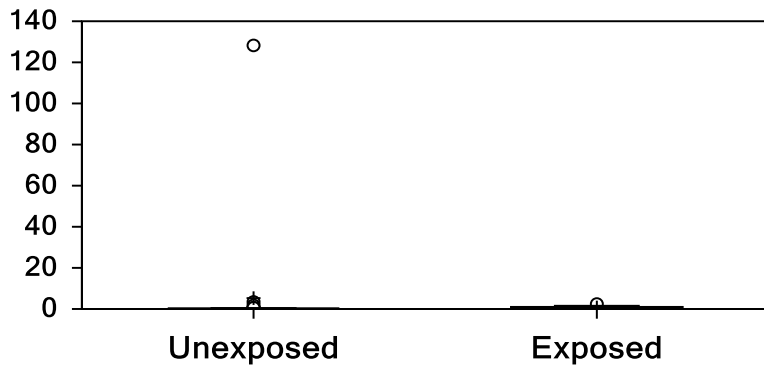

X - 16933

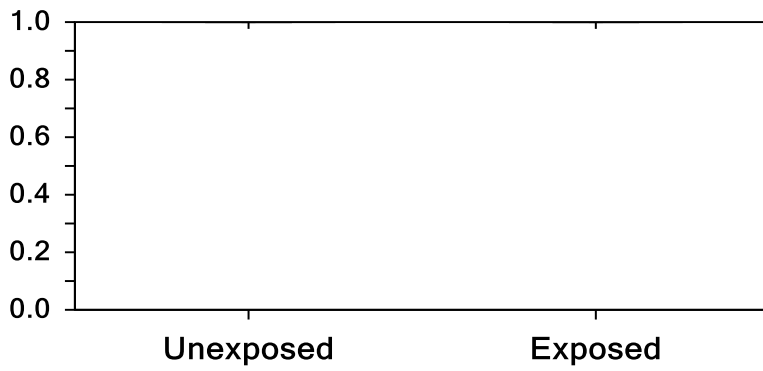



X - 16938

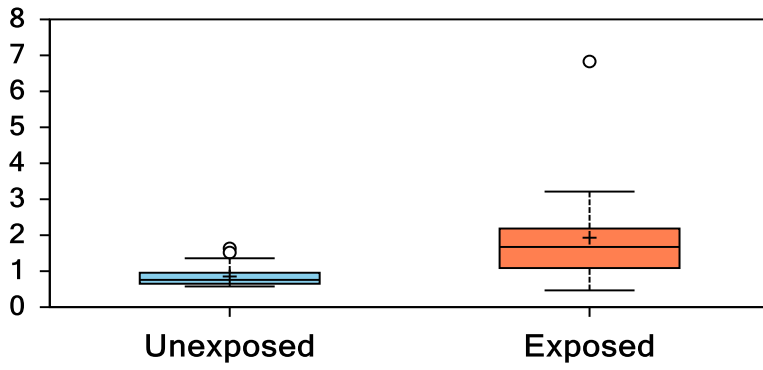

X - 16944

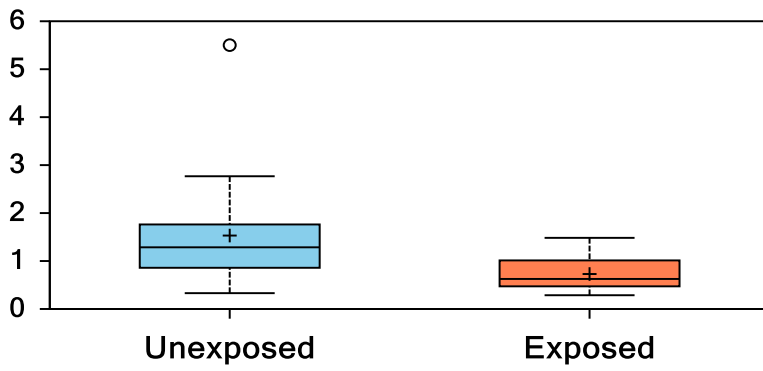

X - 16947

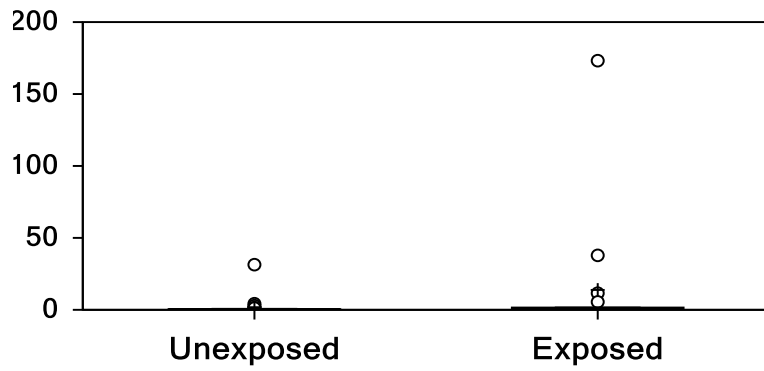

X - 17010

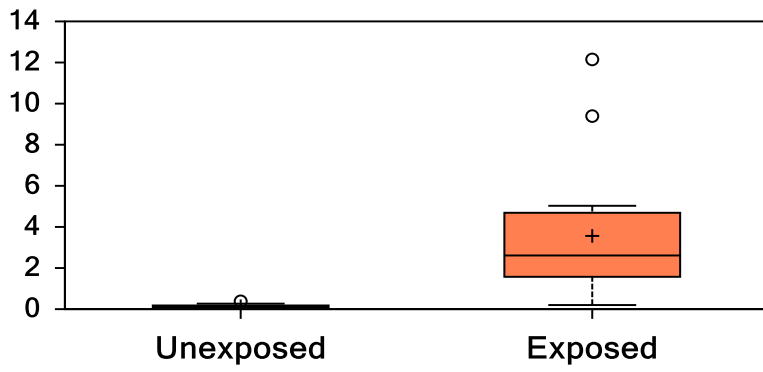

X - 17111

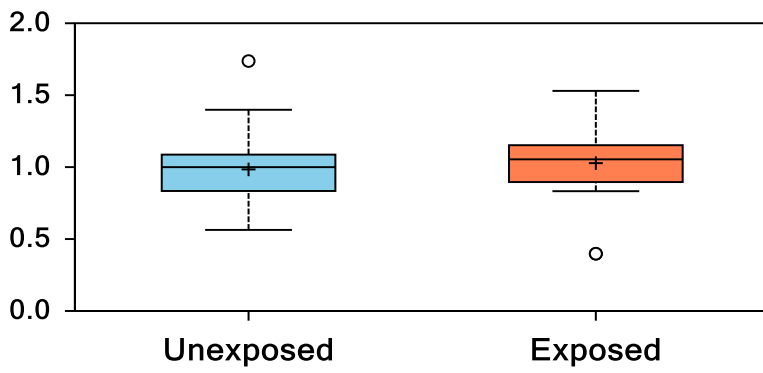

X - 17138

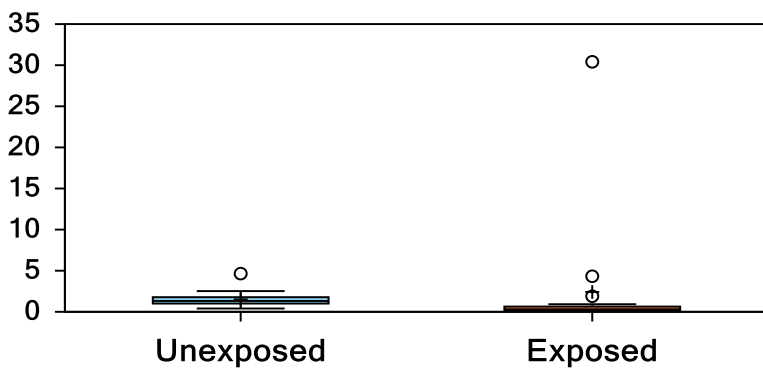

X - 17147

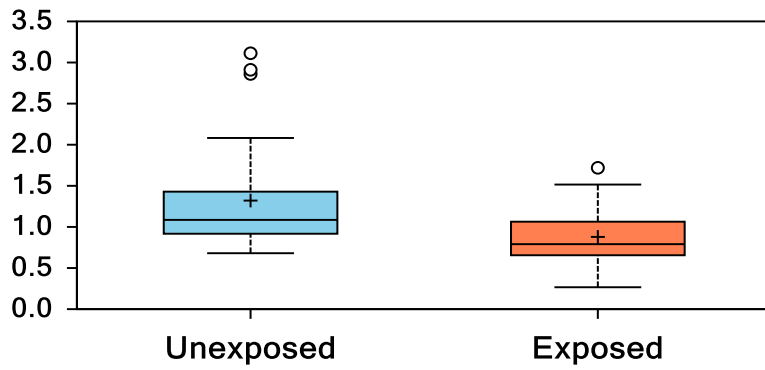

X - 17161

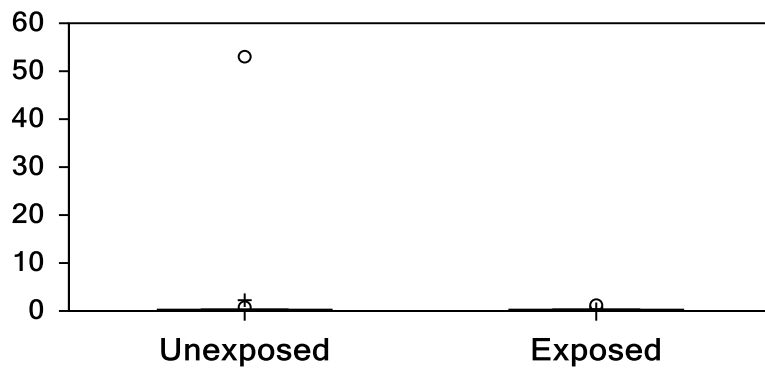

X - 17179

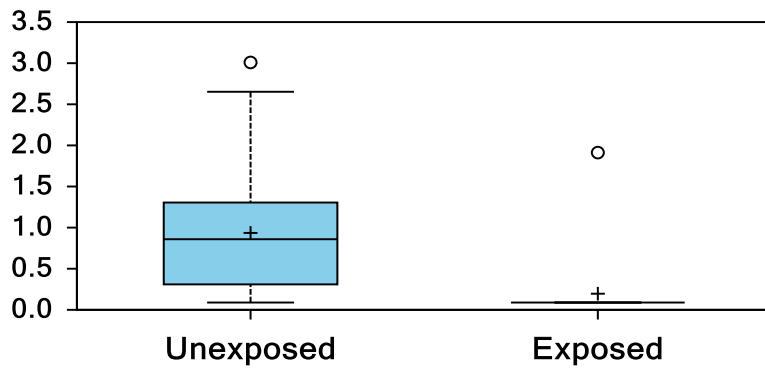

X - 17188

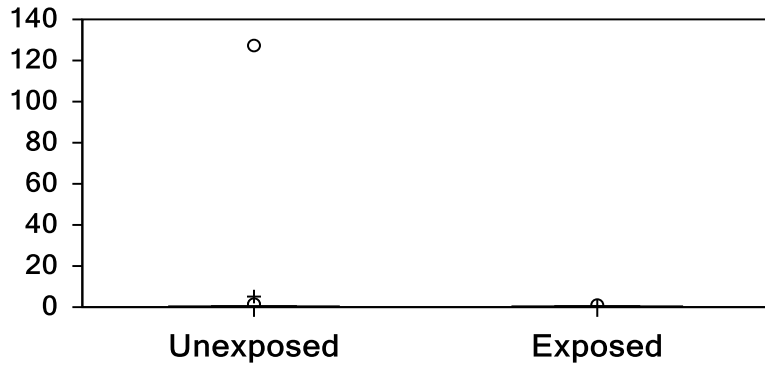

X - 17254

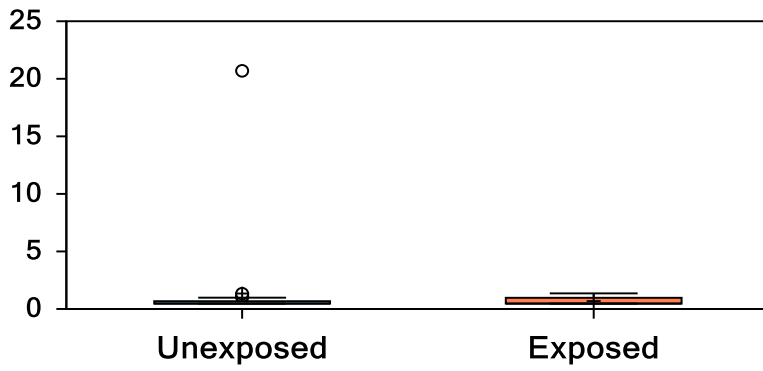

X - 17301

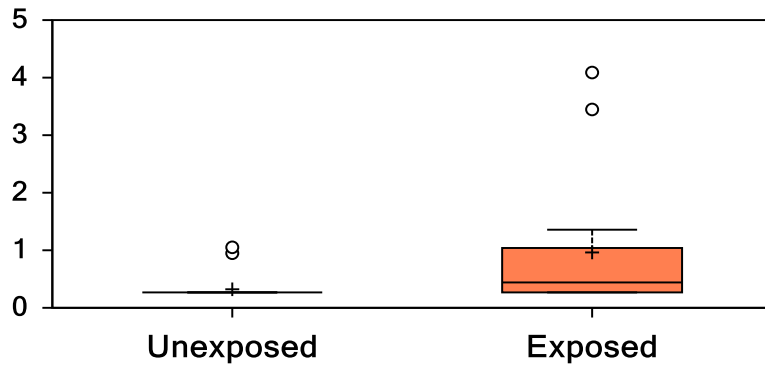

X - 17306

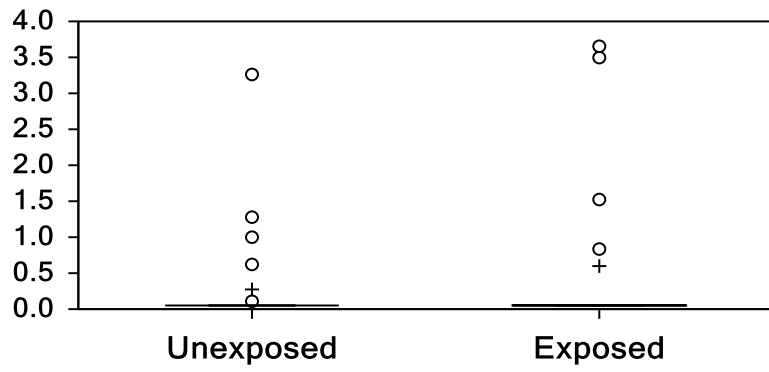

X - 17315

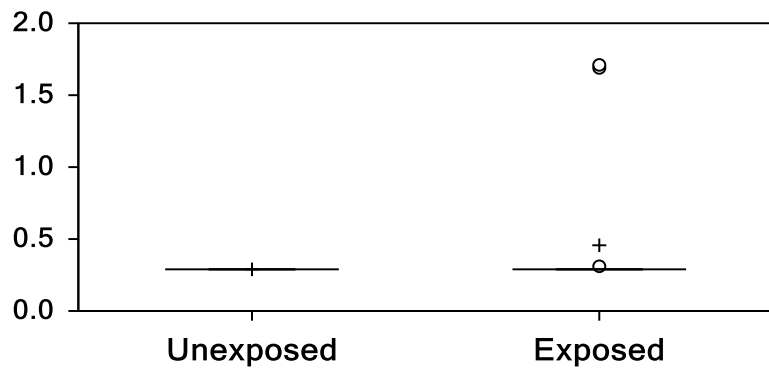

X - 17323

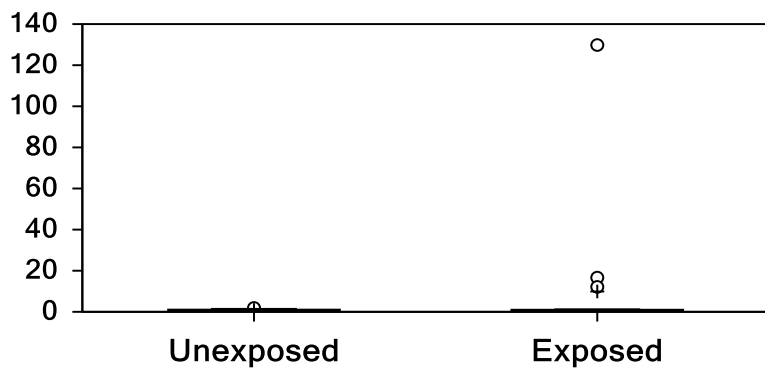

X - 17326

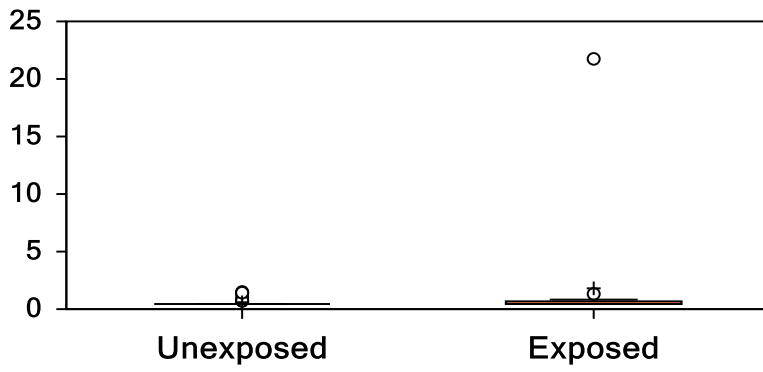

X - 17330

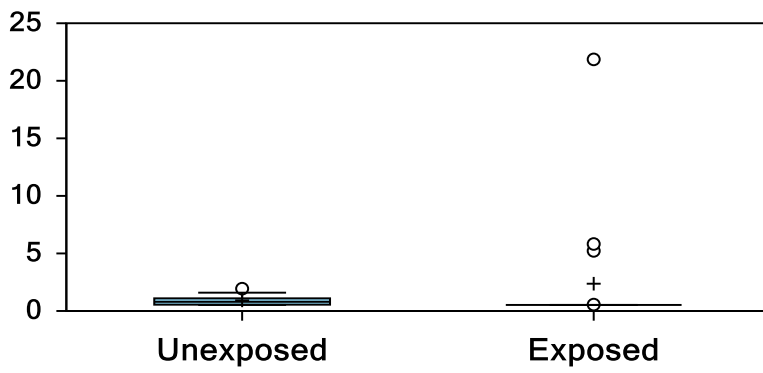

X - 17336

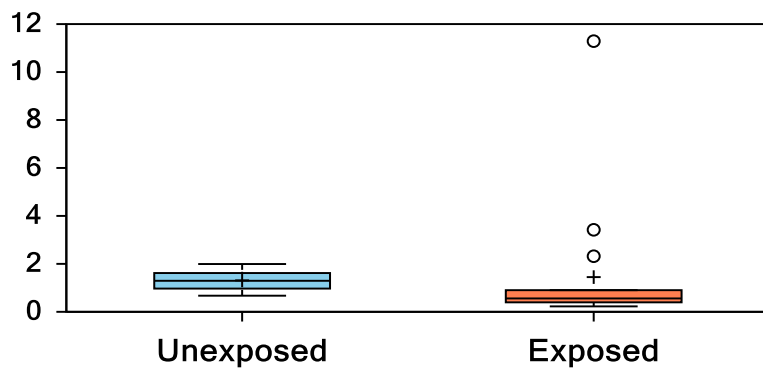

X - 17340

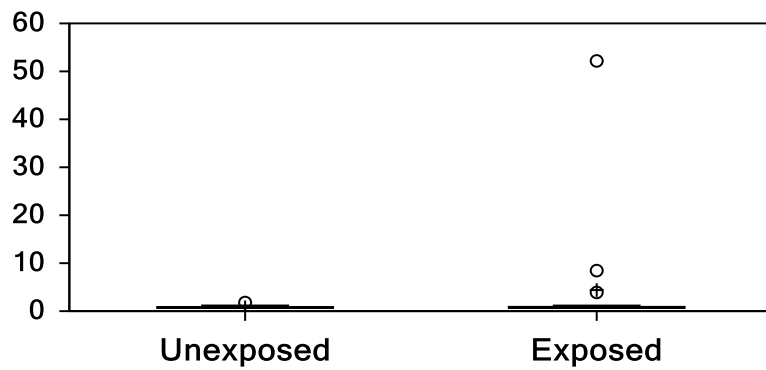

X - 17347

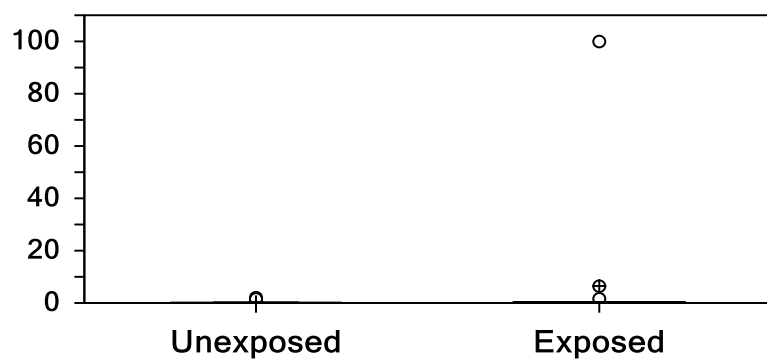

X - 17351

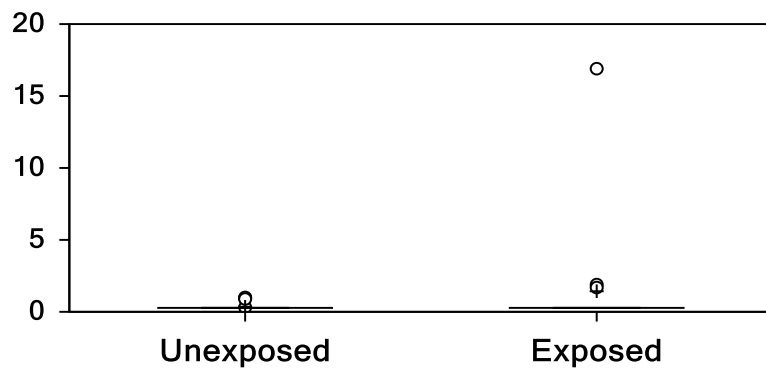

X - 17357

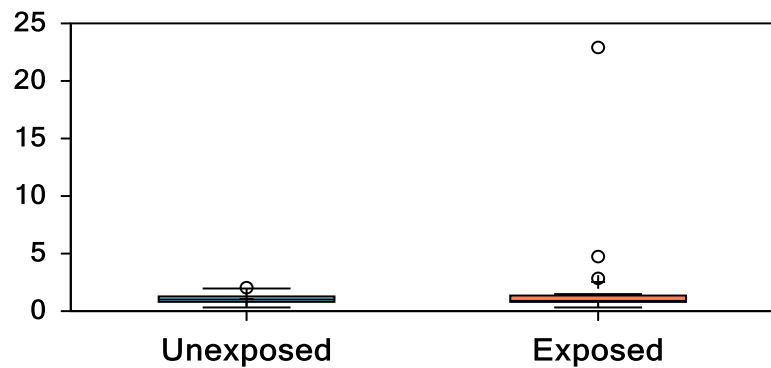

X - 17360

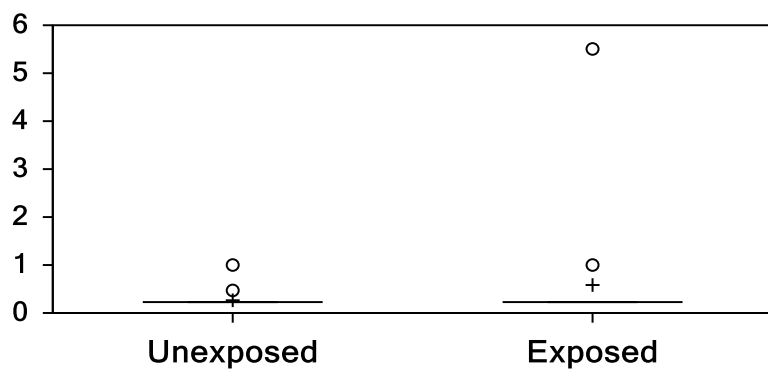

X - 17419

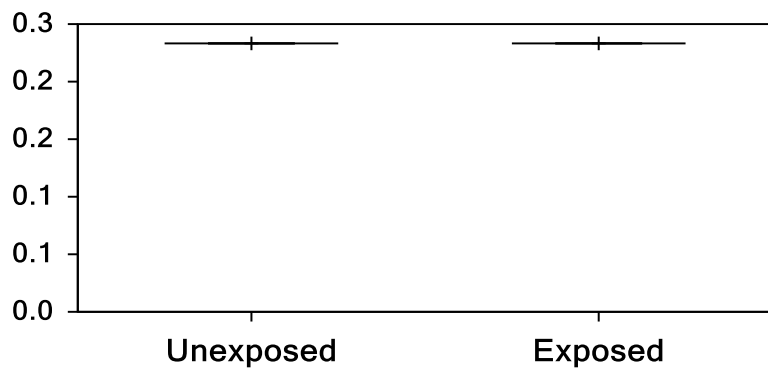



X - 17447

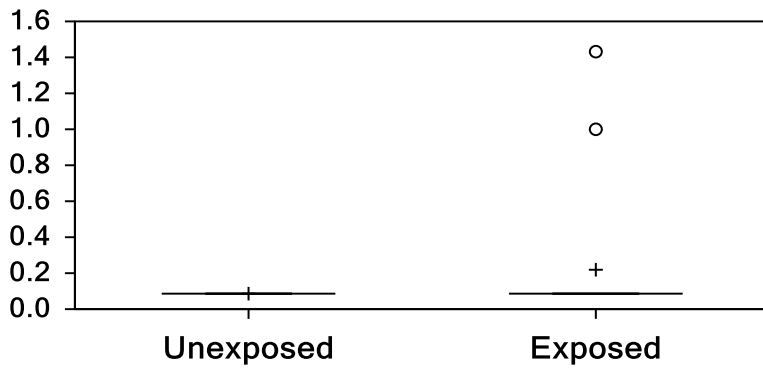

X - 17459



X - 17502

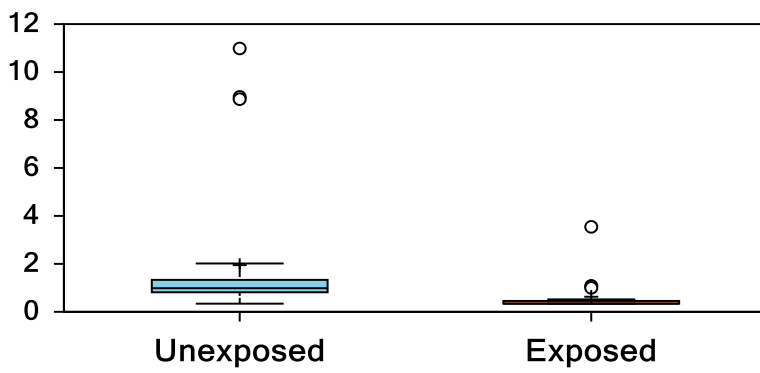

X - 17612

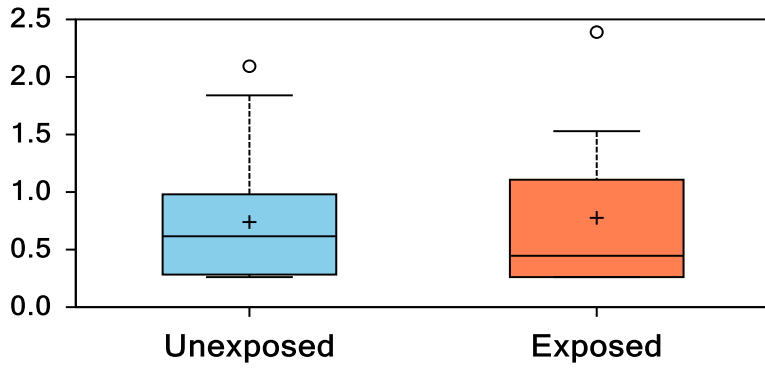

X - 17653

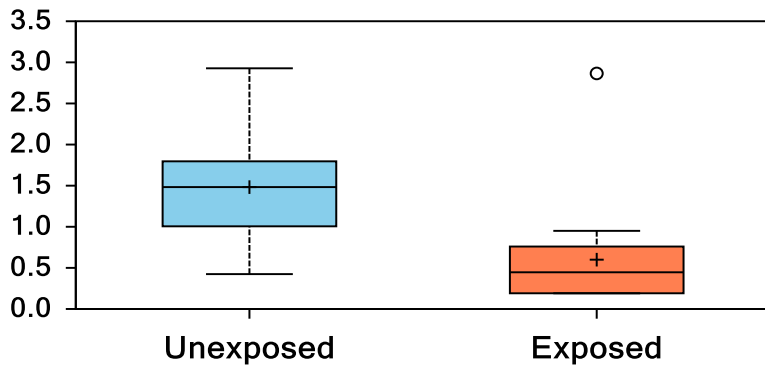

X - 17678

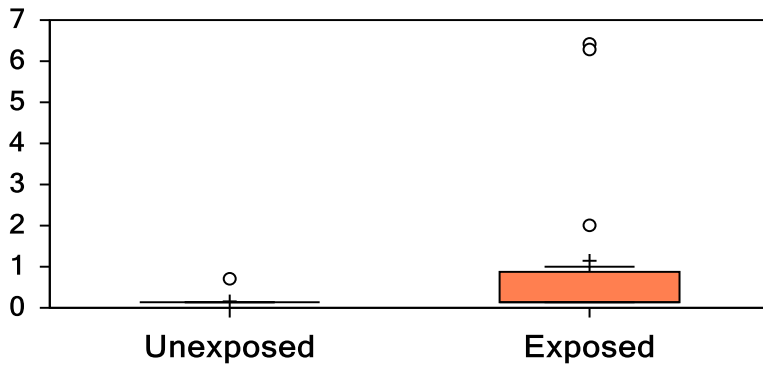

X - 17688

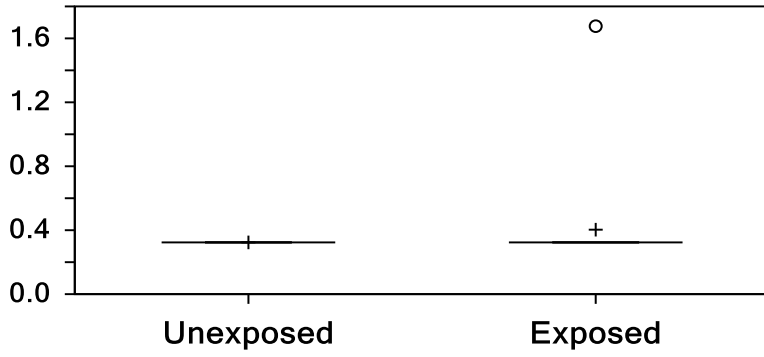

X - 17695

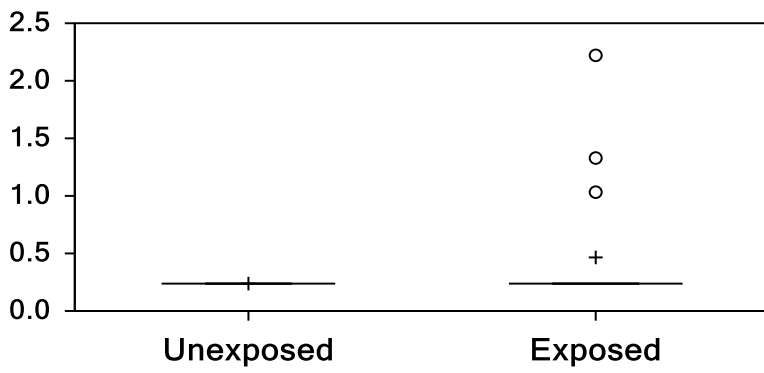

X - 17706

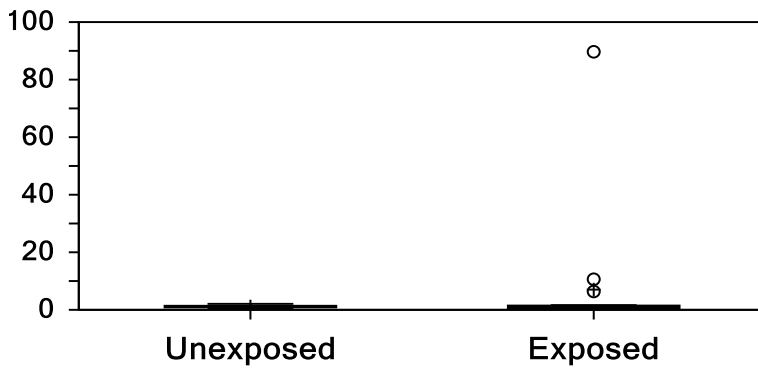

X - 17730

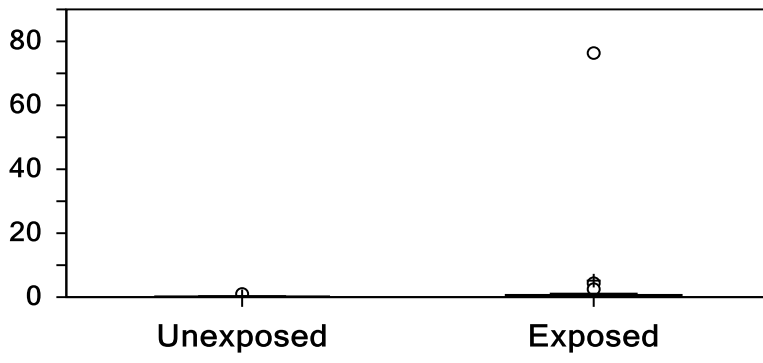

X - 17758

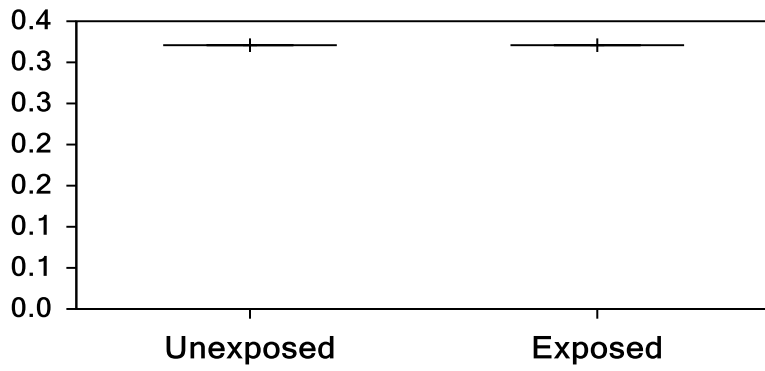

X - 17862

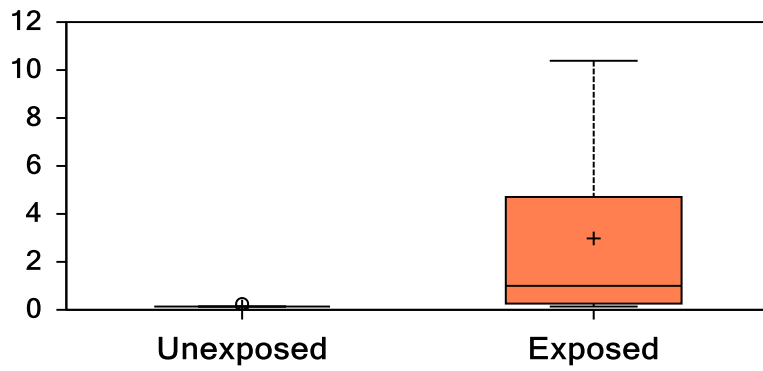

X - 17971

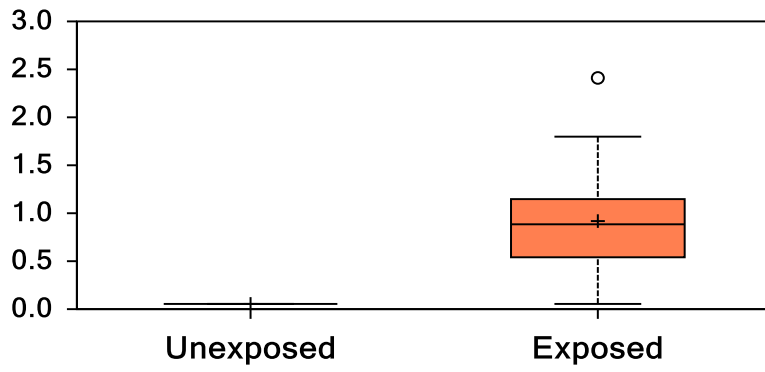

X - 18140

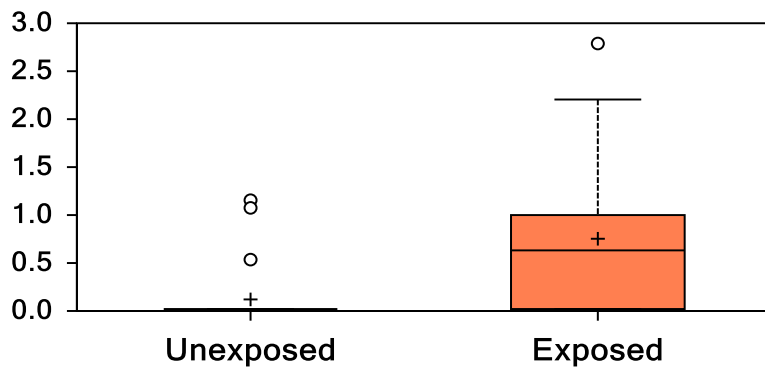

X - 18240

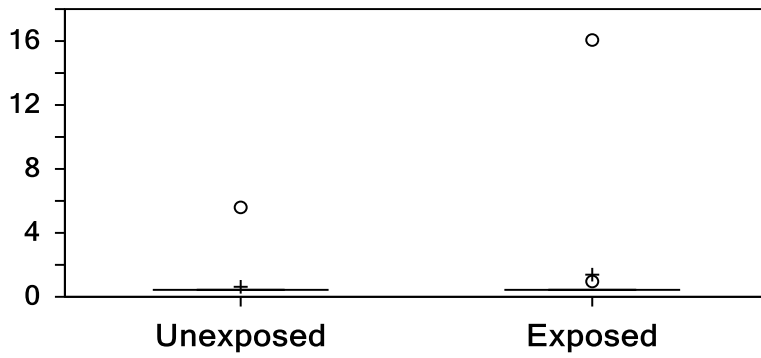

### xanthine

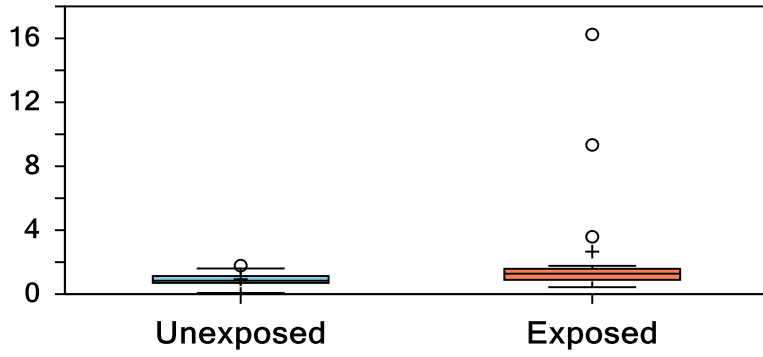

### XHWESASXXR\*

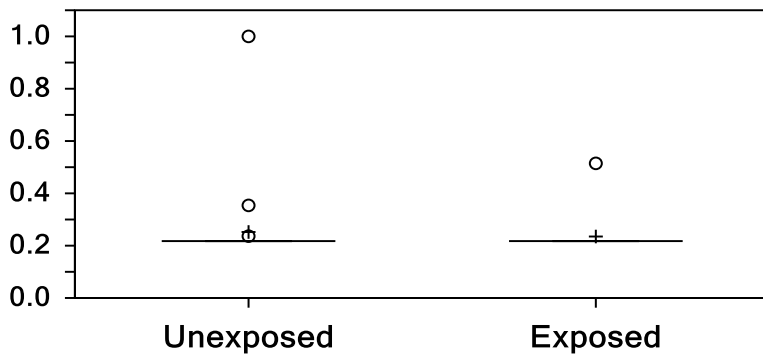

### xylose

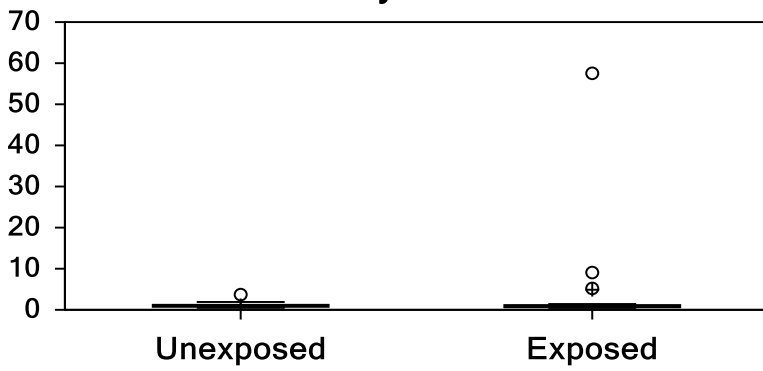

### 1,5-anhydroglucitol (1,5-AG)

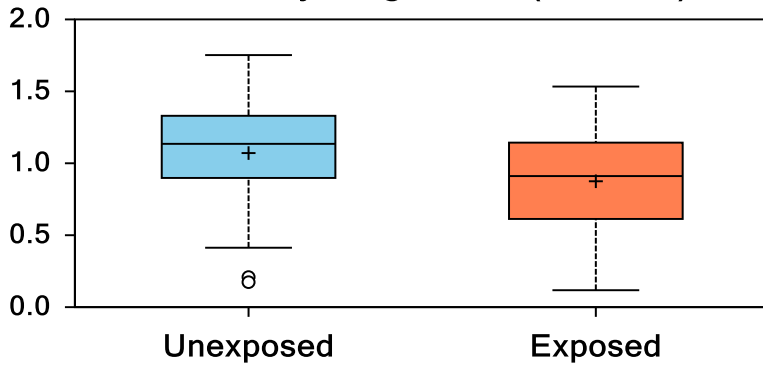

### 10-heptadecenoate (17:1n7)

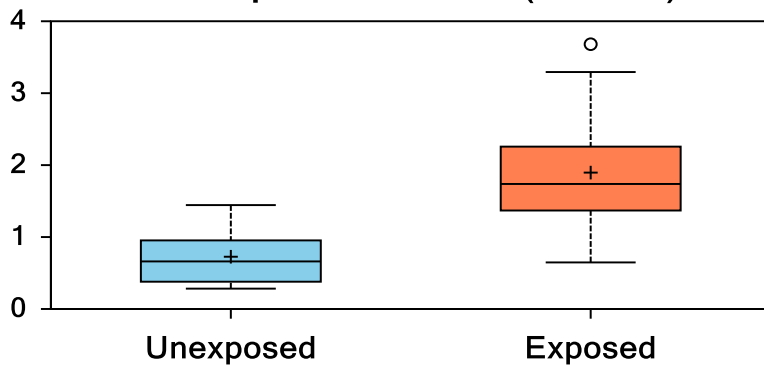

### 12-HETE

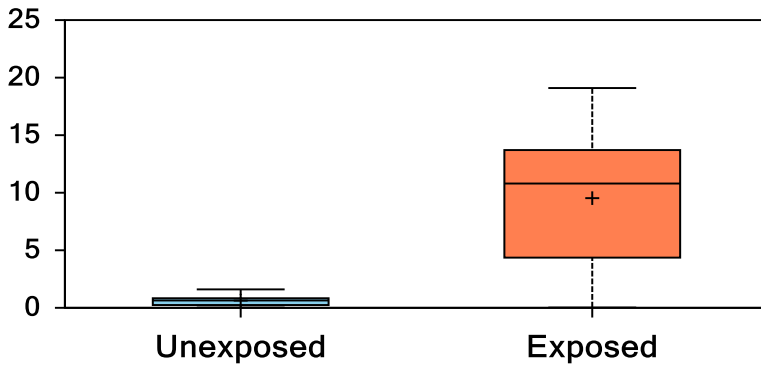

### Box and Whiskers Legend

- + Mean Value
- Median Value
- Extreme Data Points
- Upper Quartile
- Lower Quartile
- "Max" of distribution
- "Min" of distribution
- Unexposed
- Exposed

### 15-HETE

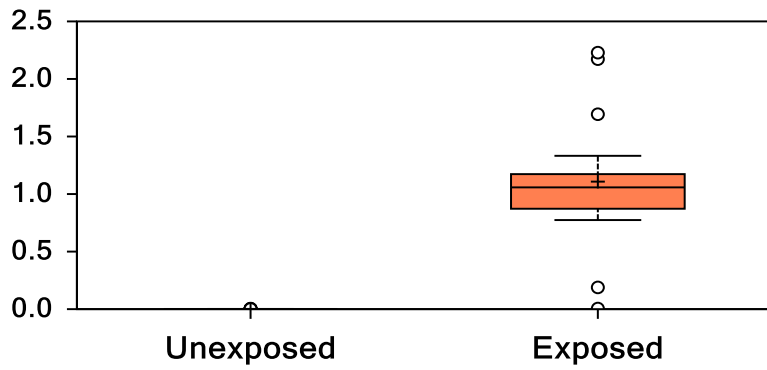

### 17-methylstearate

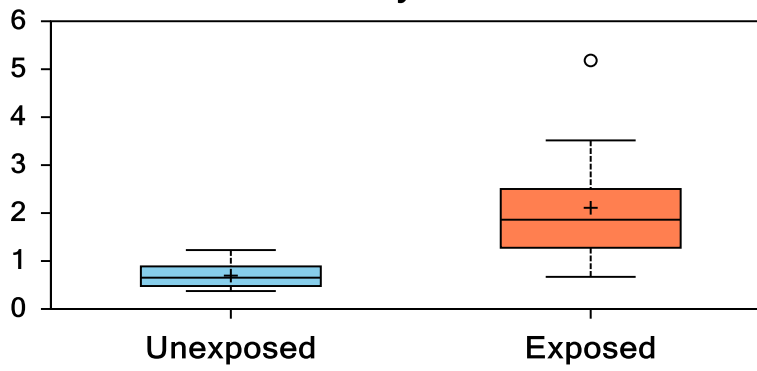

### 1-arachidonoylglycerophosphoethanolami

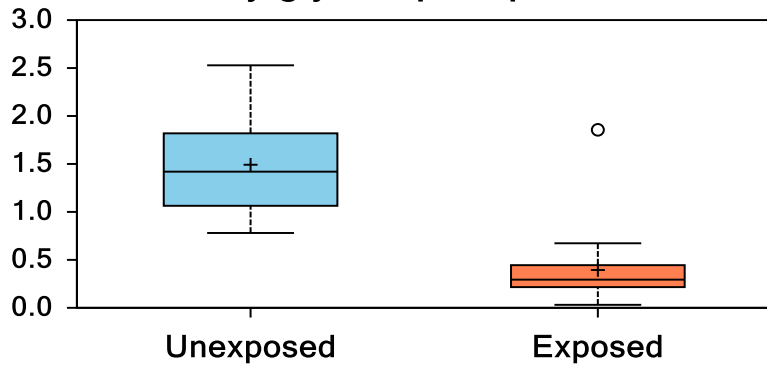



### ocosahexaenylglycerol (1-monodocosahe)

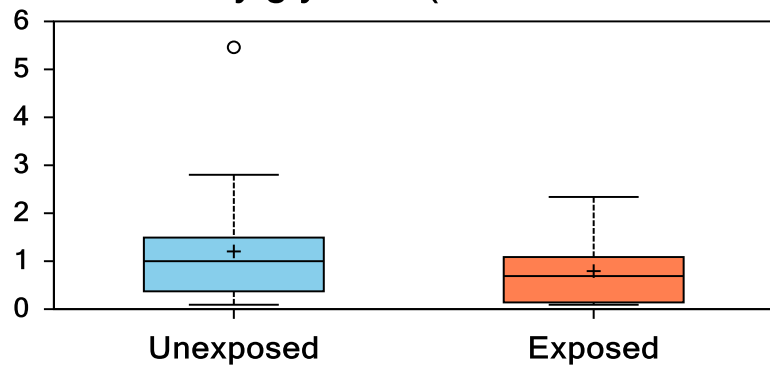

### 1-eicosadienylglycerophosphocholine

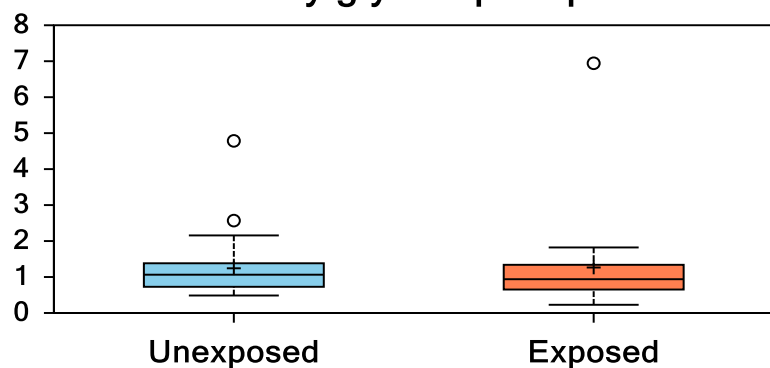

### 1H-quinolin-2-one

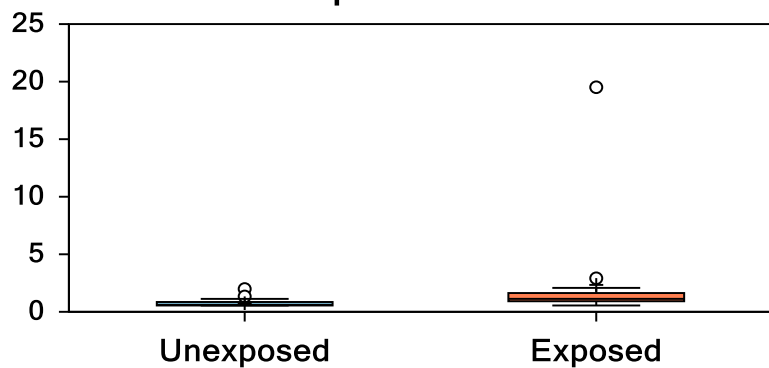

### 1-linoleoylglycerophosphoethanolamine\*

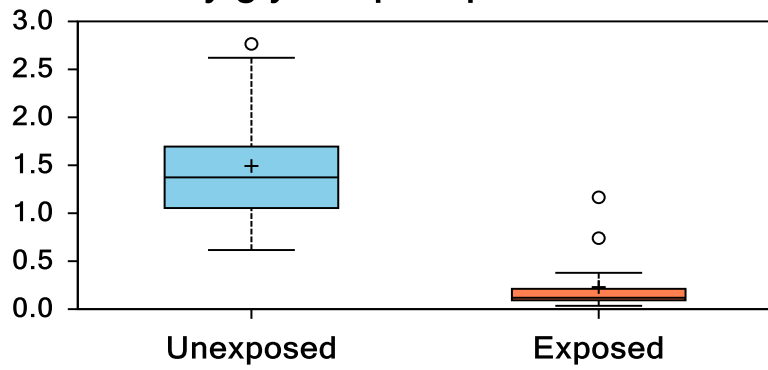

### 1-myristoylglycerophosphocholine

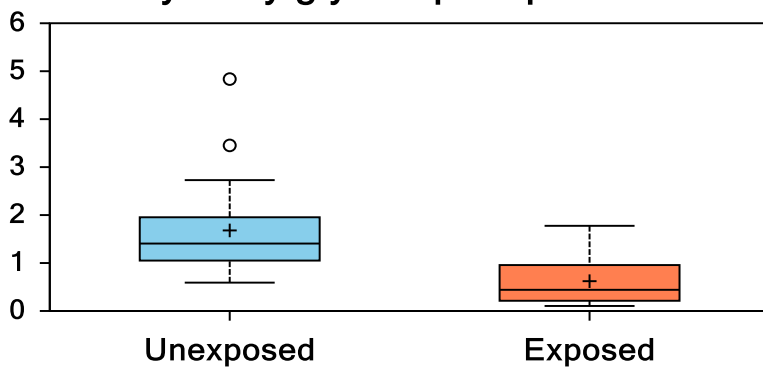

### 1-oleoylglycerophosphocholine

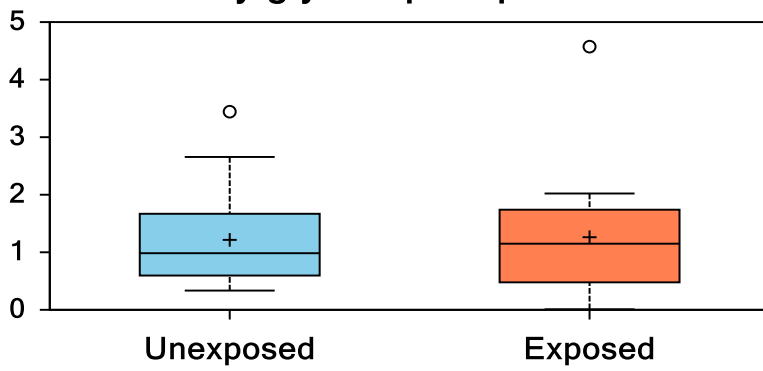

### 1-palmitoylglycerophosphate

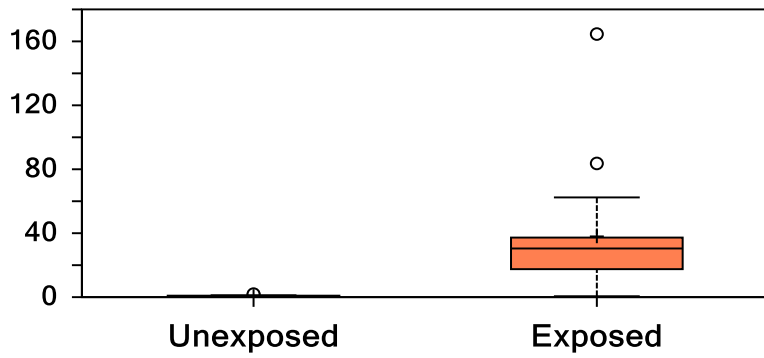

### 1-palmitoylglycerophosphoinositol\*

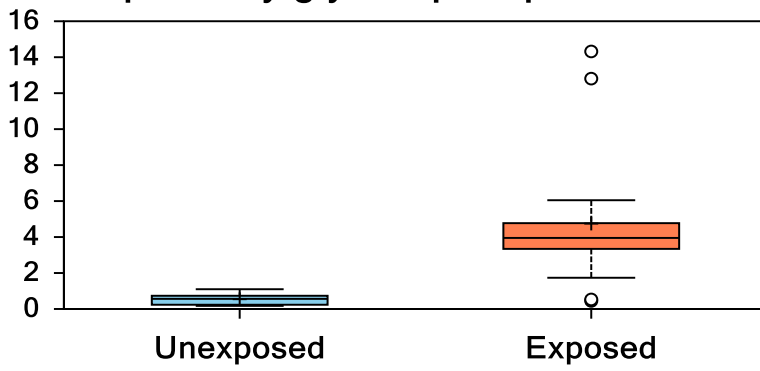

### 1-stearoylglycerol (1-monostearin)

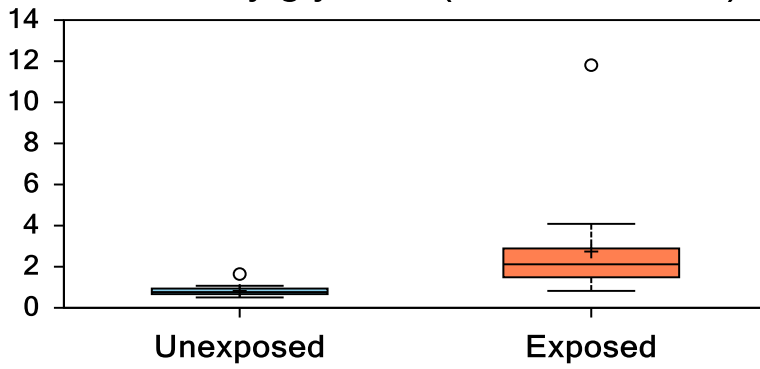

**1-stearoylglycerophosphoinositol**

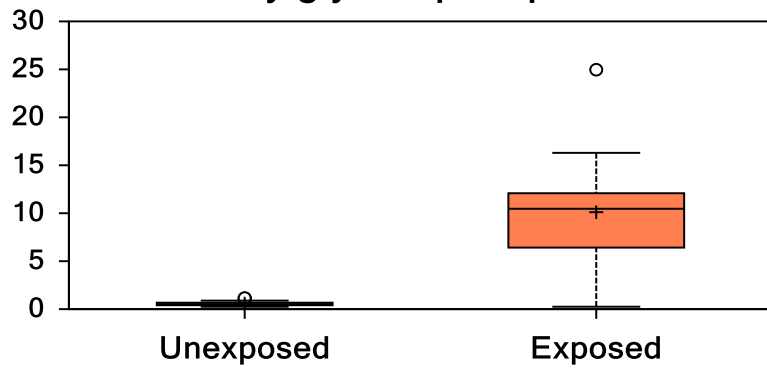

**2,3-diphosphoglycerate**

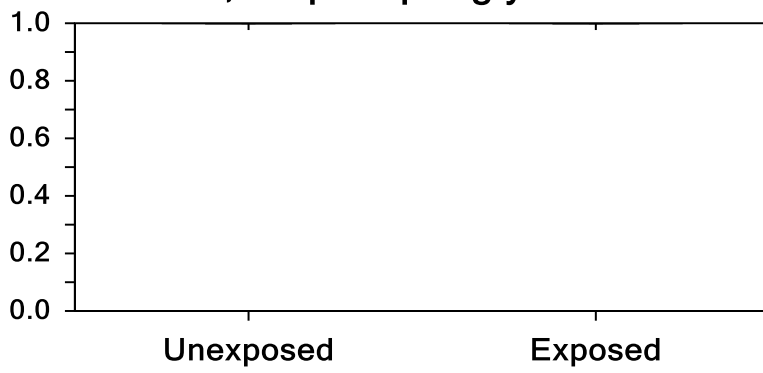

**2-aminobutyrate**

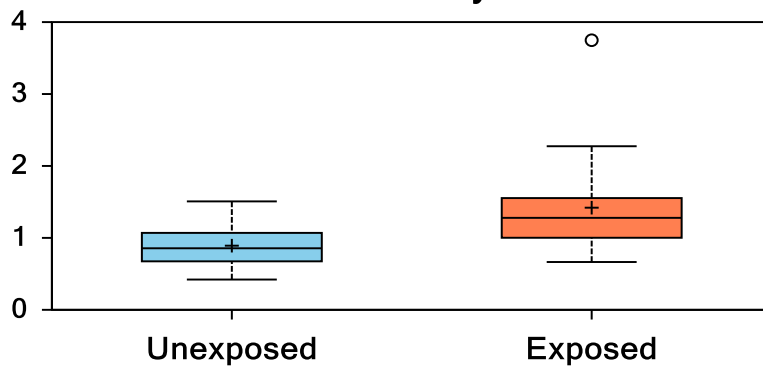

### 2-eicosatrienoylglycerophosphocholine\*

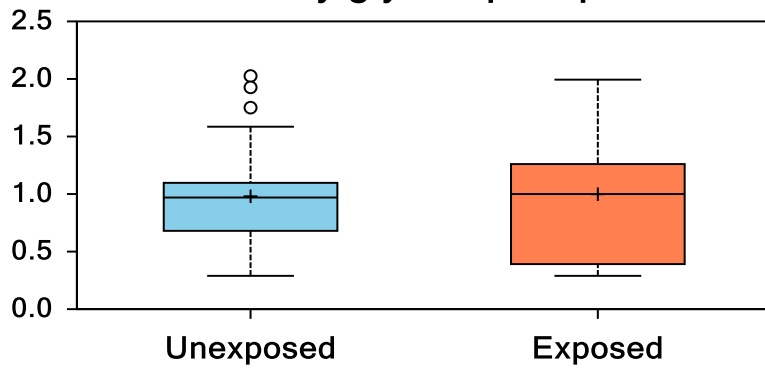

### 2-hydroxyacetaminophen sulfate\*

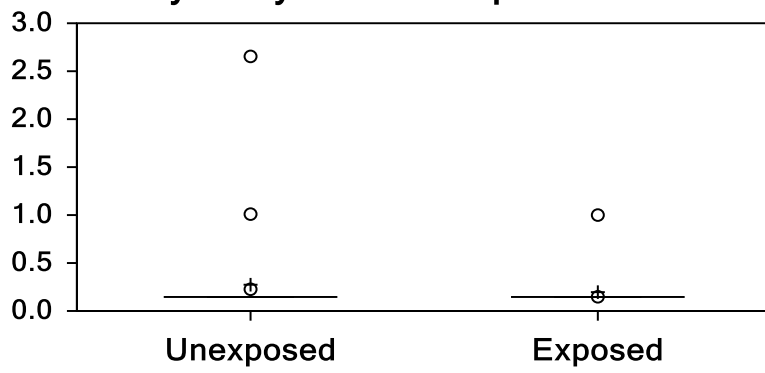

### 2-hydroxyglutarate

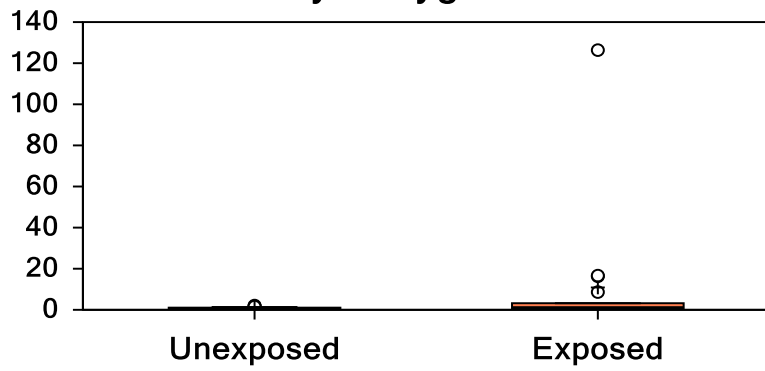

2-hydroxymyristate

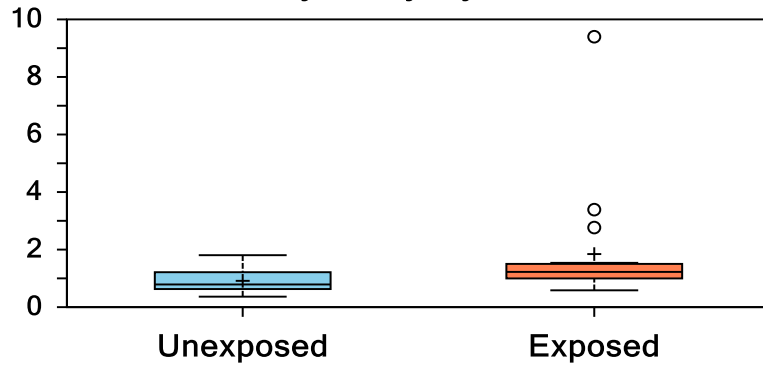

2-hydroxystearate

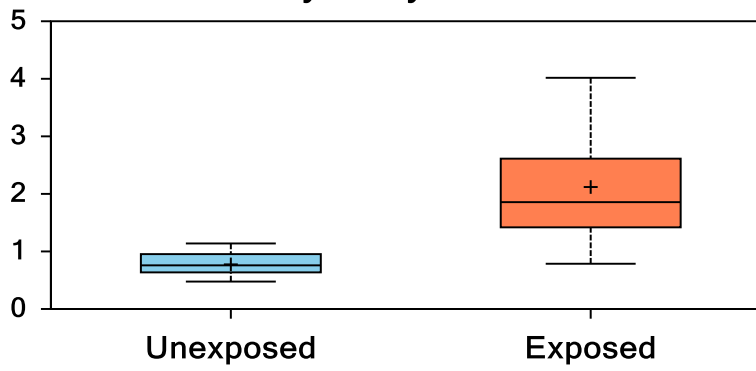

2-methoxyacetaminophen sulfate\*

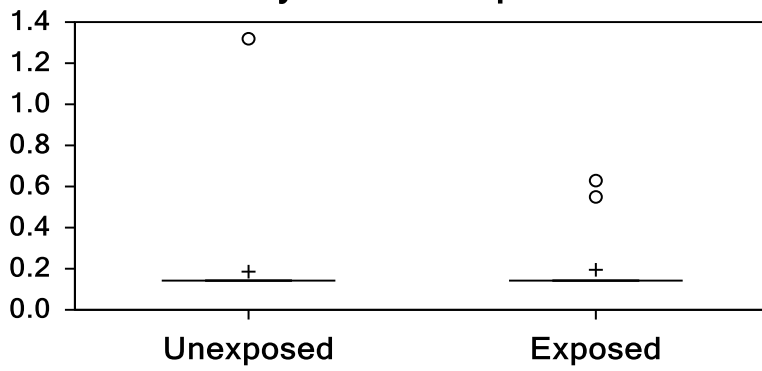

### 2-methylhippurate

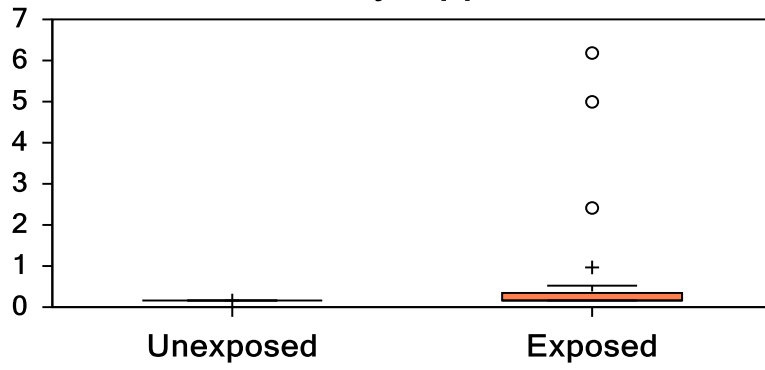

### 2-oleoylglycerophosphoethanolamine\*

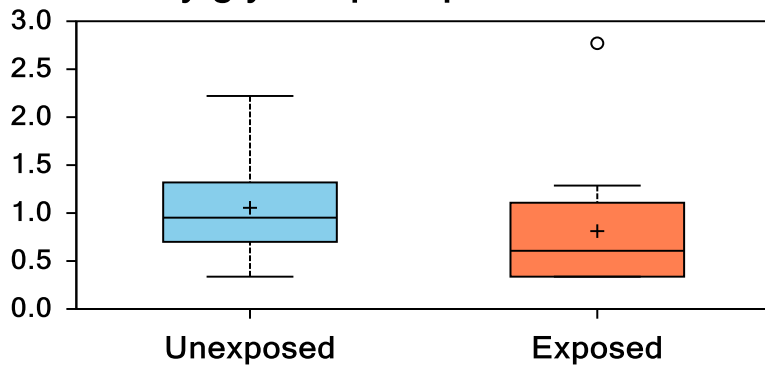

### 2-palmitoleoylglycerophosphocholine\*

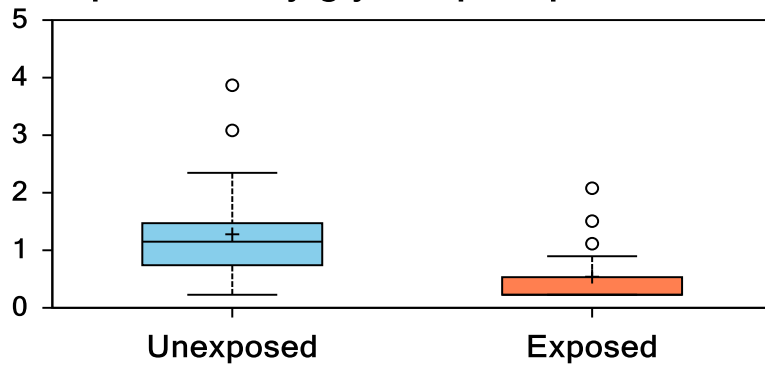

2-stearoylglycerophosphocholine\*

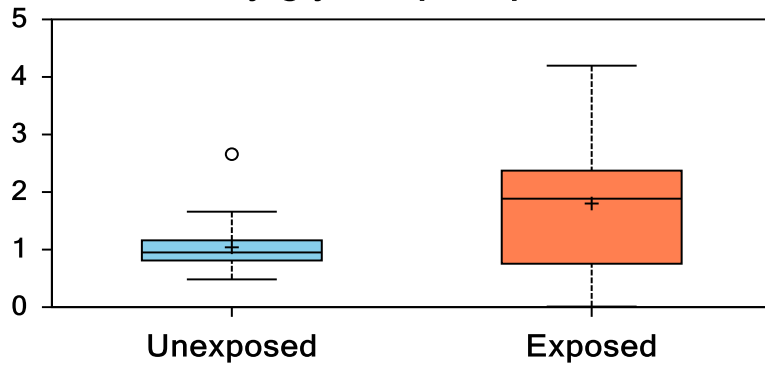

3-(cystein-S-yl)acetaminophen\*

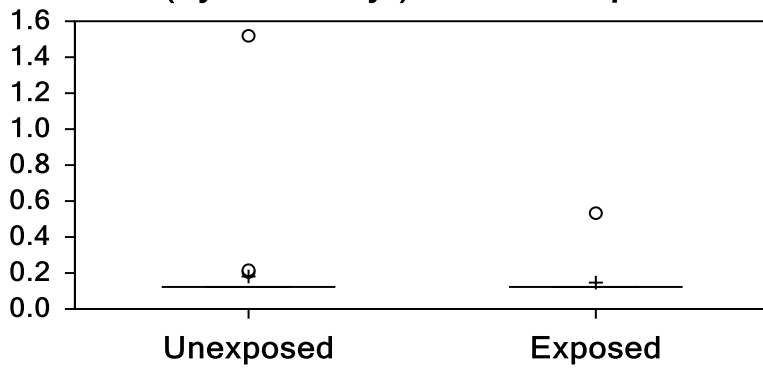

3-dehydrocarnitine\*

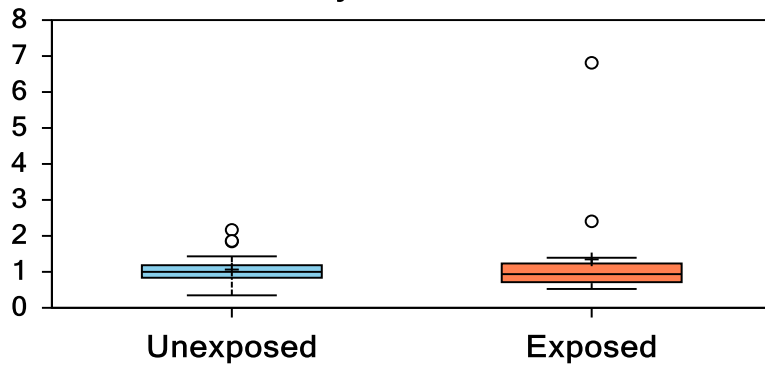



### 3-hydroxy-3-methylglutarate

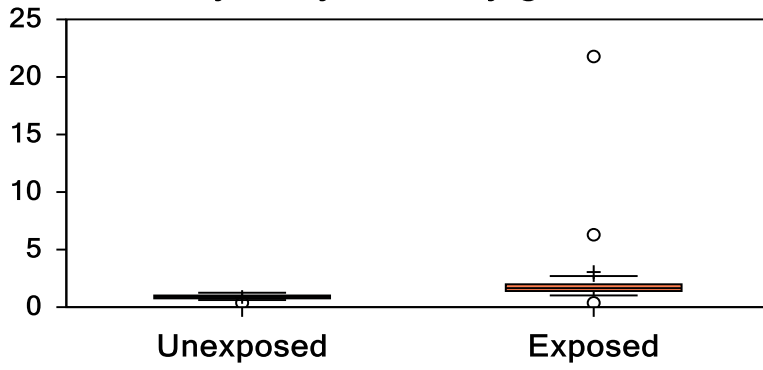

### 3-hydroxyhippurate

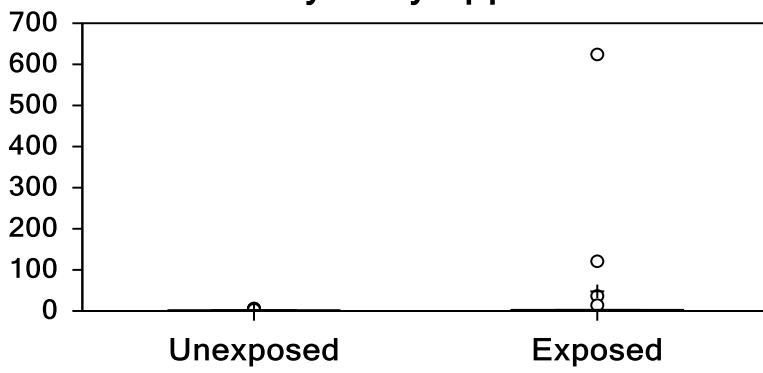

### 3-hydroxyoctanoate

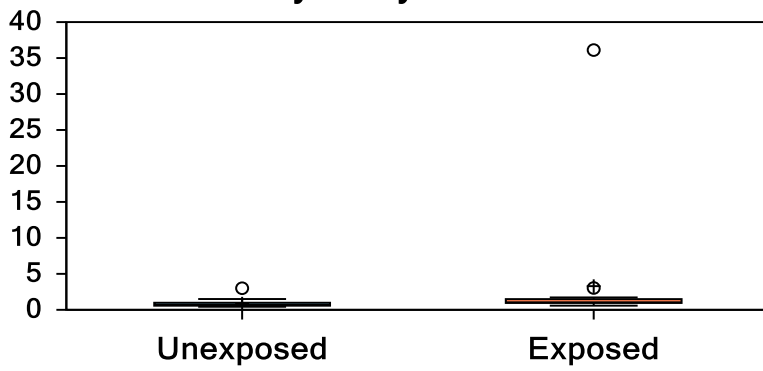

### 3-methoxytyrosine

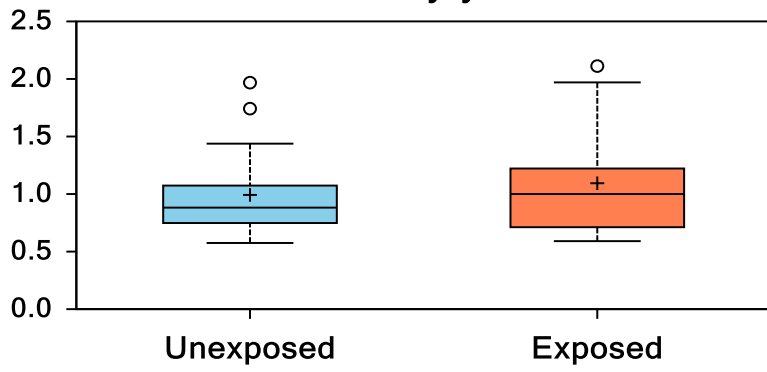

### 3-methylglutaconate

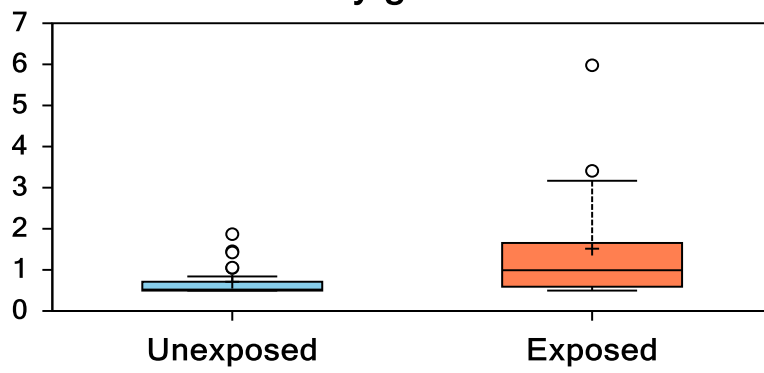

### 3-phenylpropionate (hydrocinnamate)

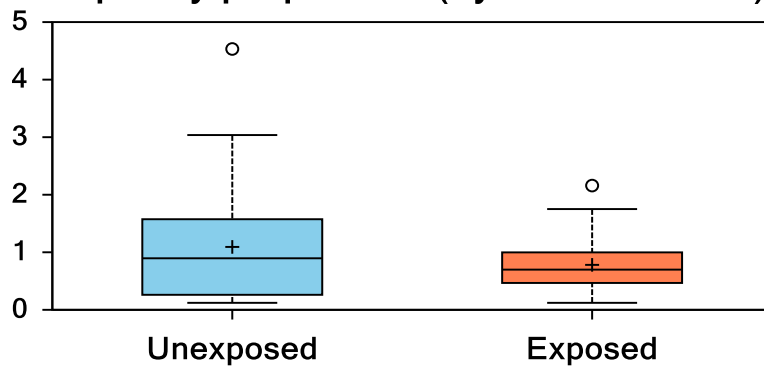

### 4-acetamidophenol

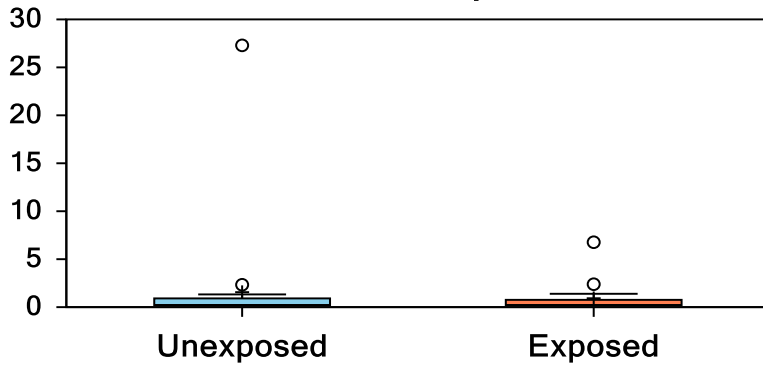

### 4-androsten-3beta,17beta-diol disulfate 1

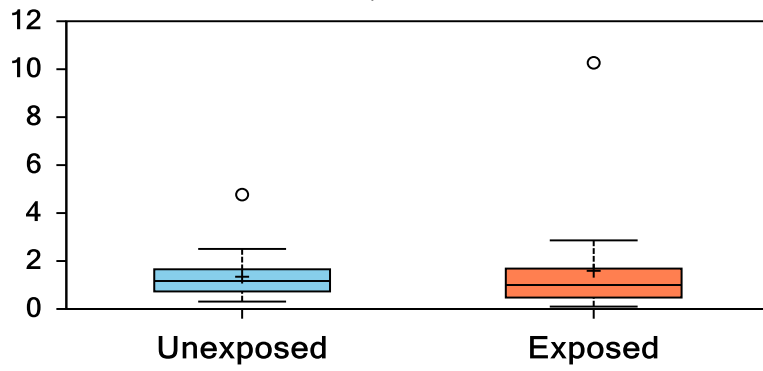

### 4-guanidinobutanoate

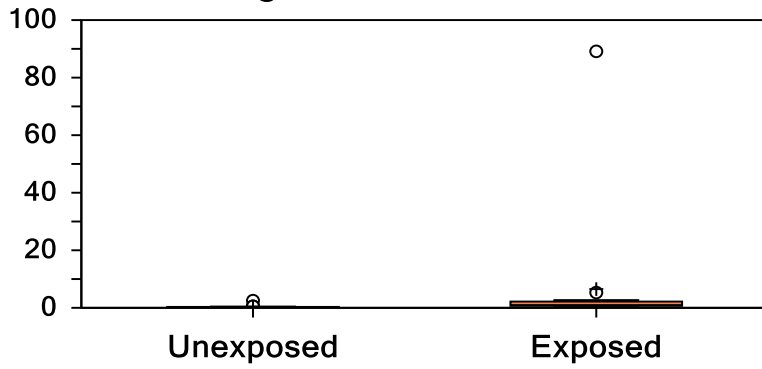

### 4-hydroxyglutamate

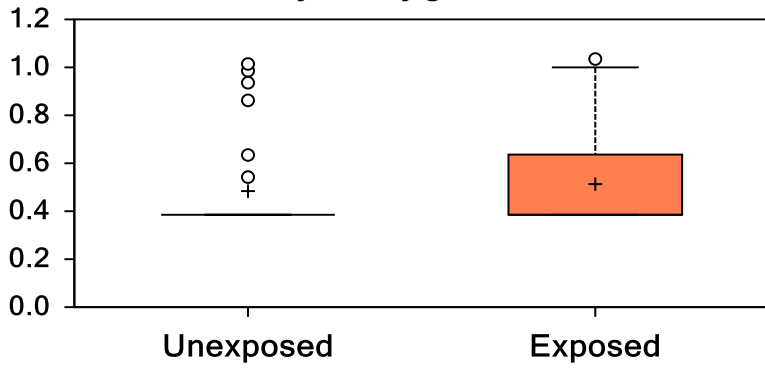

### 4-hydroxyphenylpyruvate

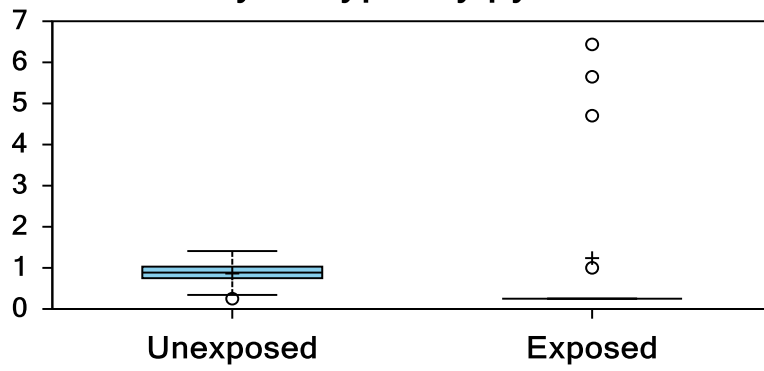

### 4-methylthio-2-oxobutanoate

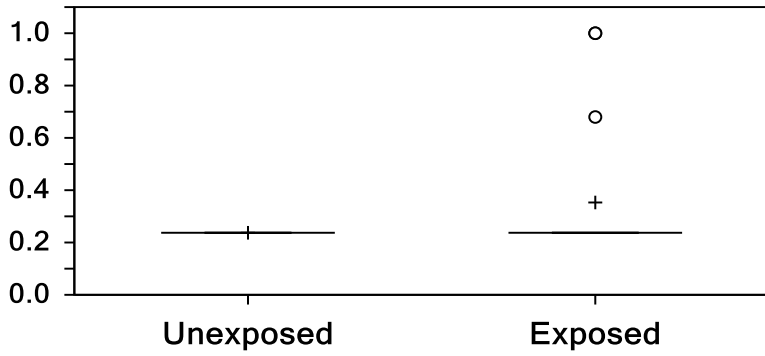

5 $\alpha$ -androstane-3 $\alpha$ ,17 $\alpha$ -diol disulfide

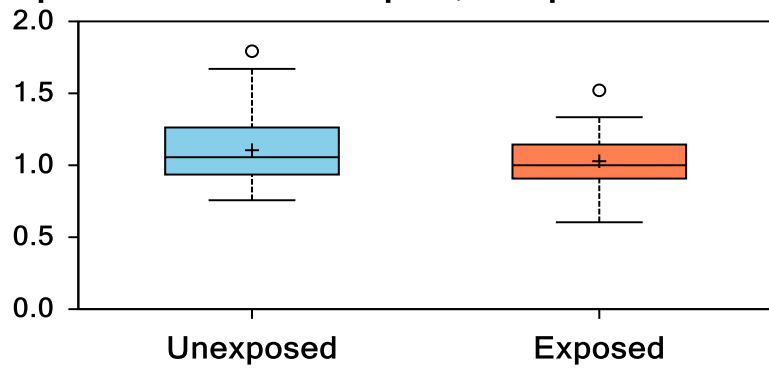

5 $\alpha$ -androstane-3 $\beta$ ,17 $\beta$ -diol disulfide

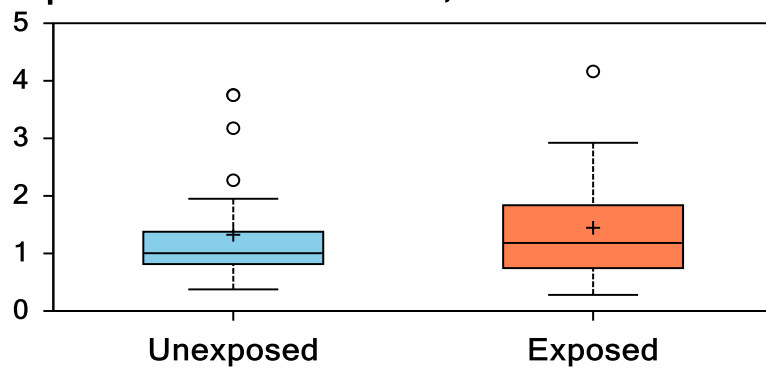

5-aminovaleerate

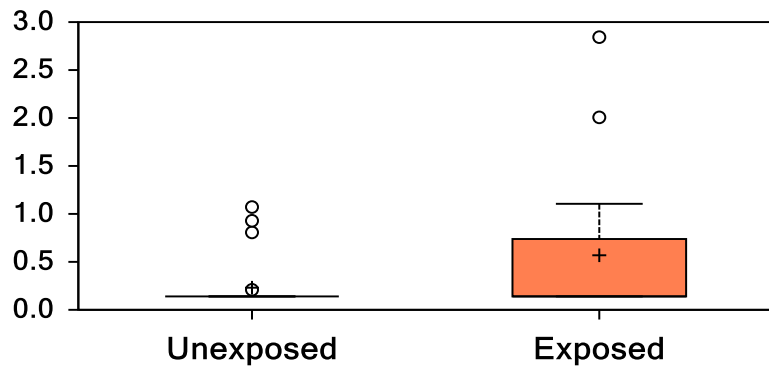

### 5-HETE

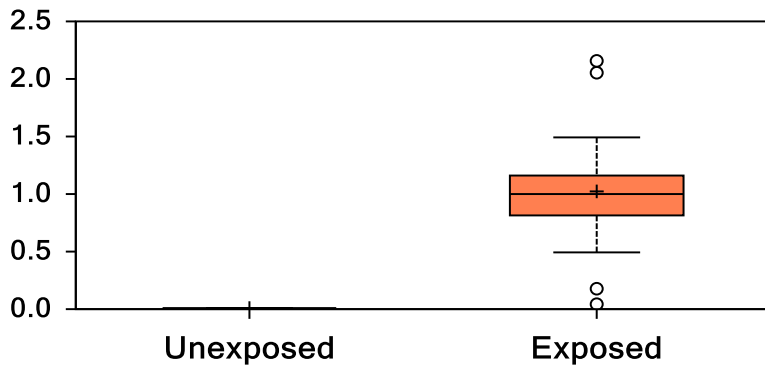

### 5-methyluridine (ribothymidine)

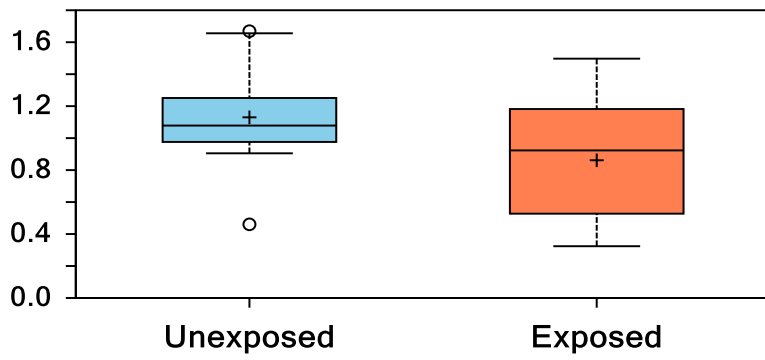

### alpha-hydroxy-3-oxo-4-cholestenoate (7-Ho

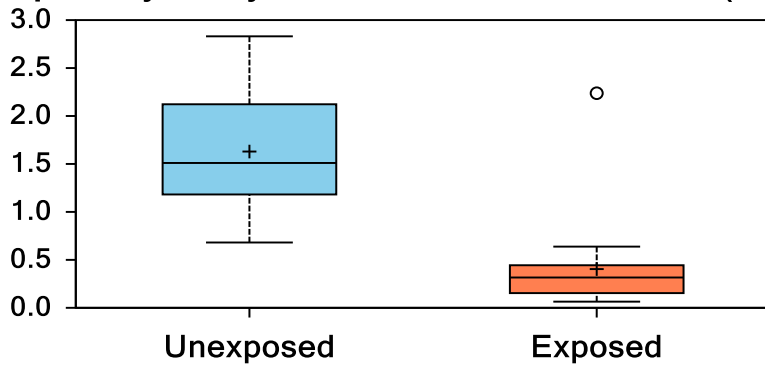

### 7-ketocholesterol

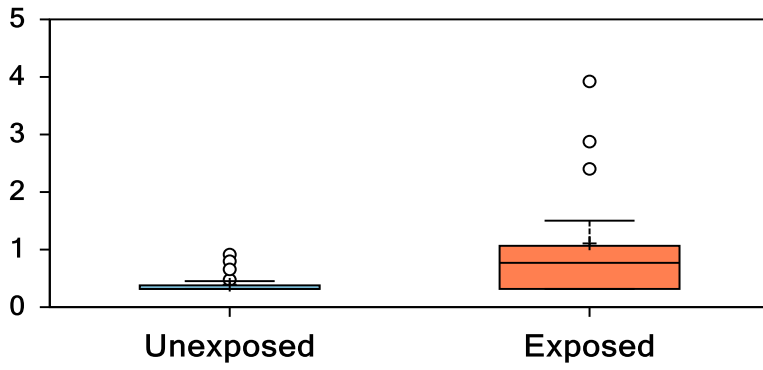

### 7-methylxanthine

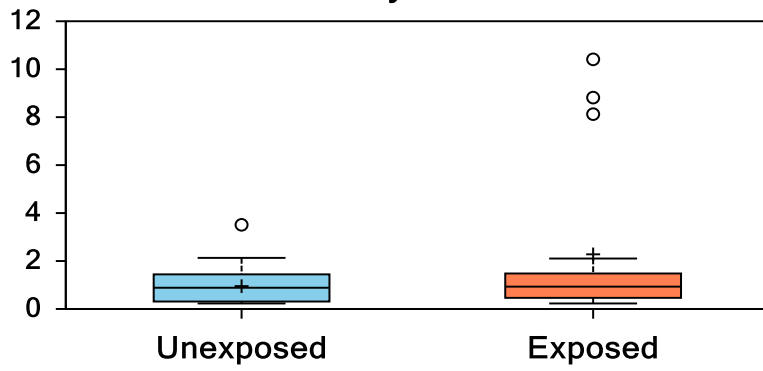

### acetylcarnitine

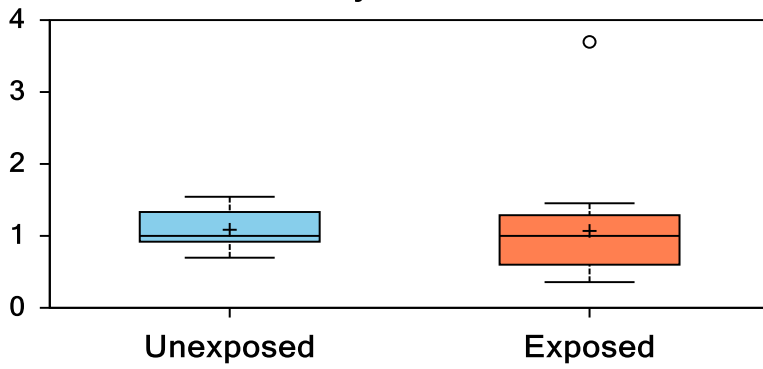

### adenosine 5'diphosphoribose

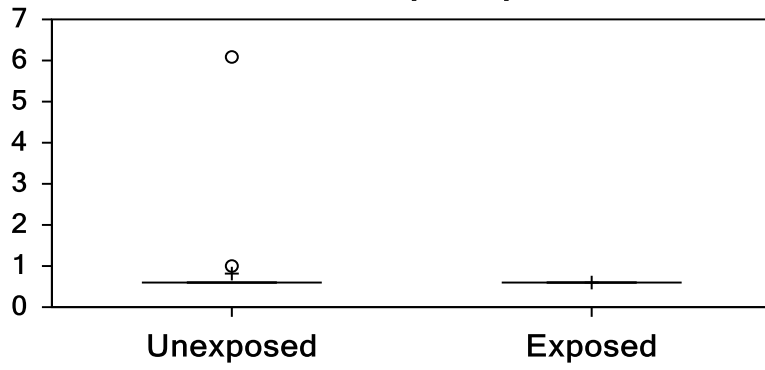

### ADpSGEGDFXAEGGGVR\*

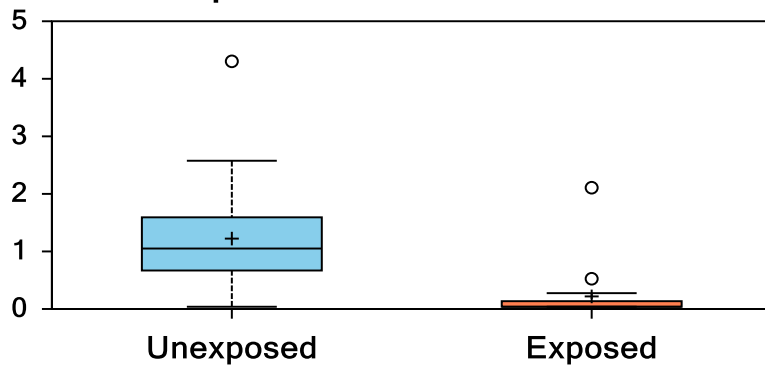

### alanine

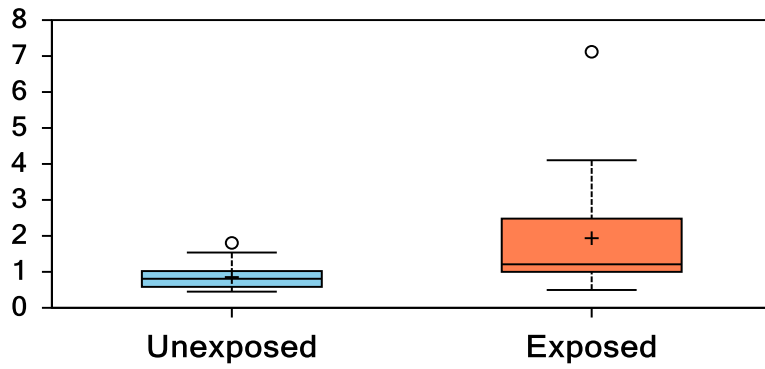



### alanylleucine

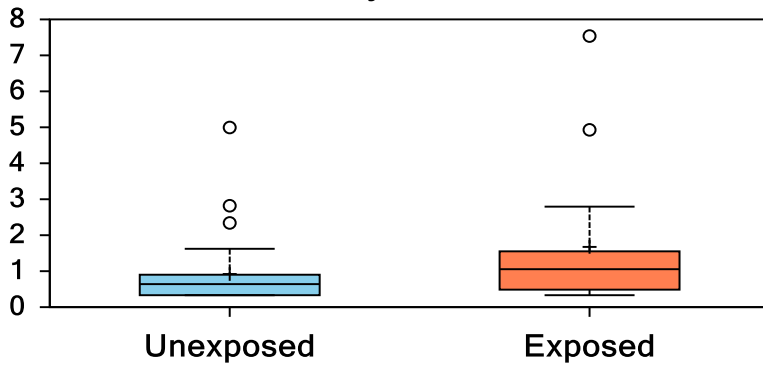

### alpha-glutamyltyrosine

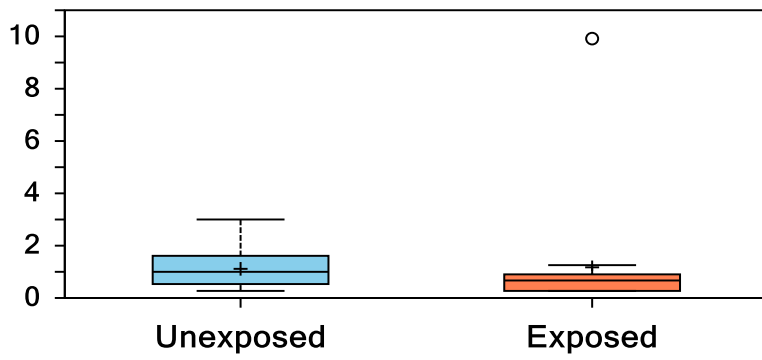

### alpha-hydroxyisovalerate

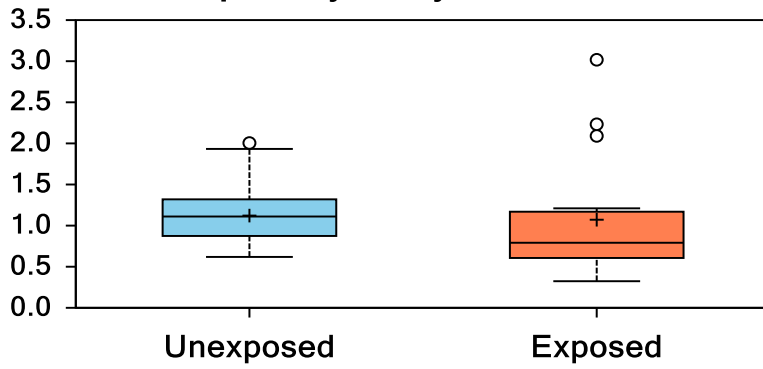

androsterone sulfate

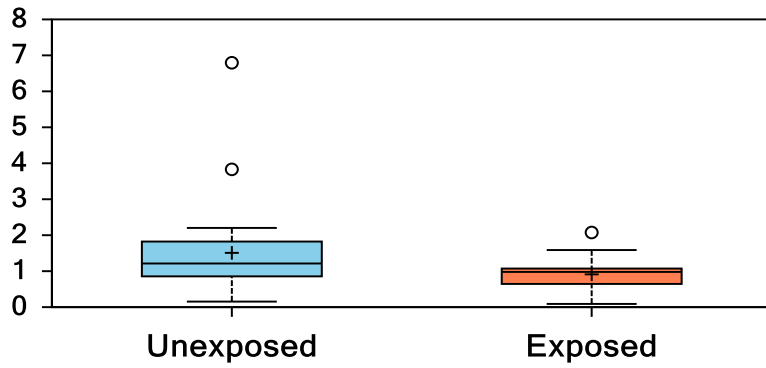

arabitol

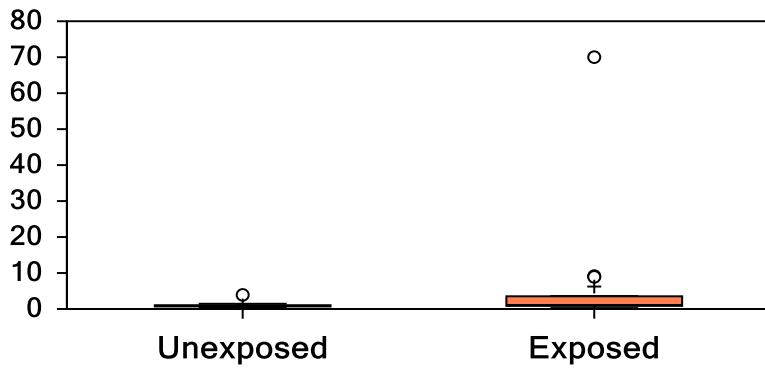

arginine

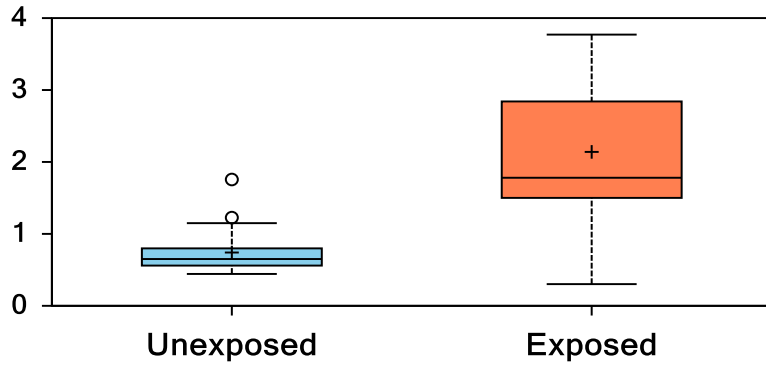

asparagine

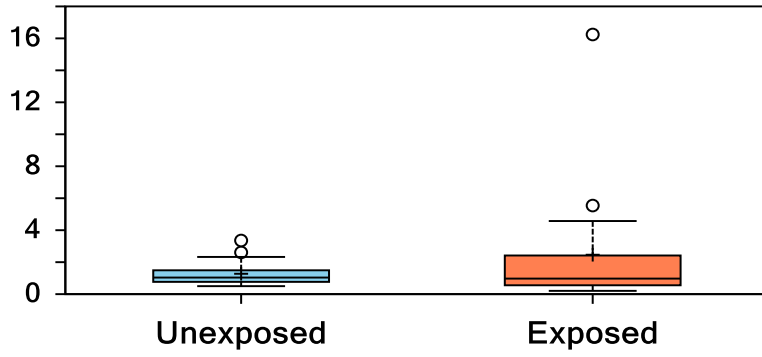

aspartylleucine

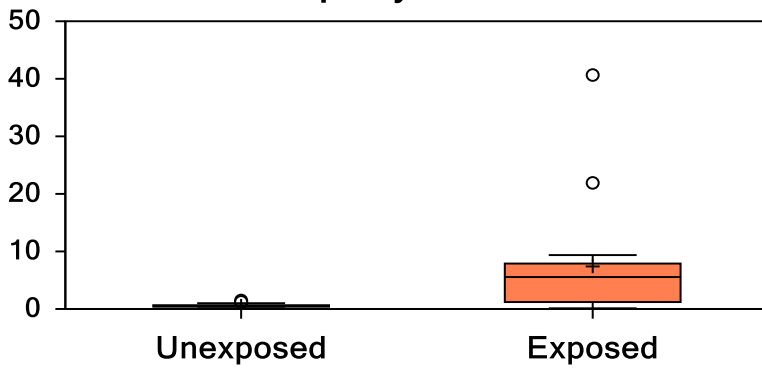

benzamide

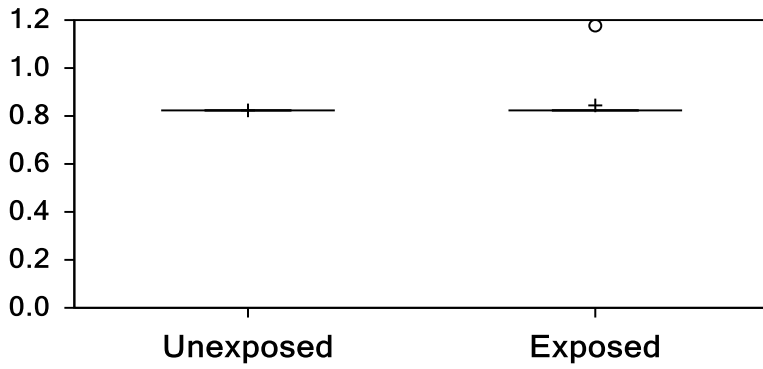

**beta-hydroxyisovalerate**

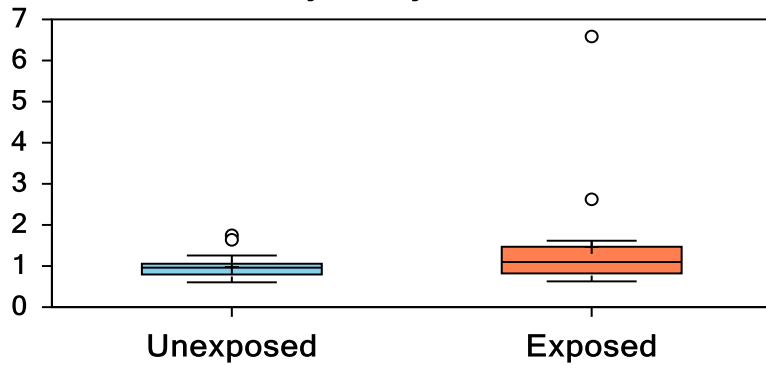

**beta-tocopherol**

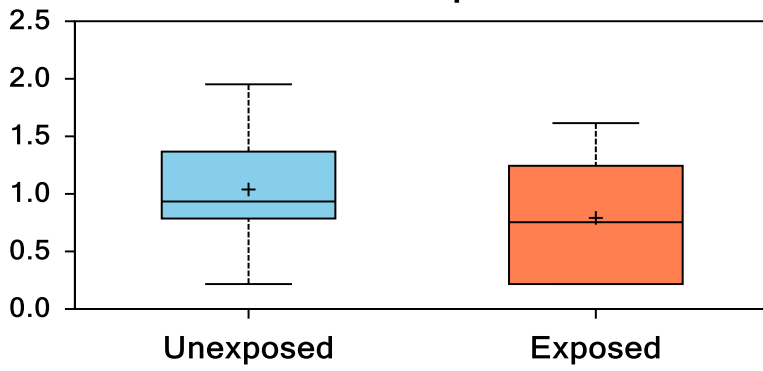

**bilirubin (Z,Z)**

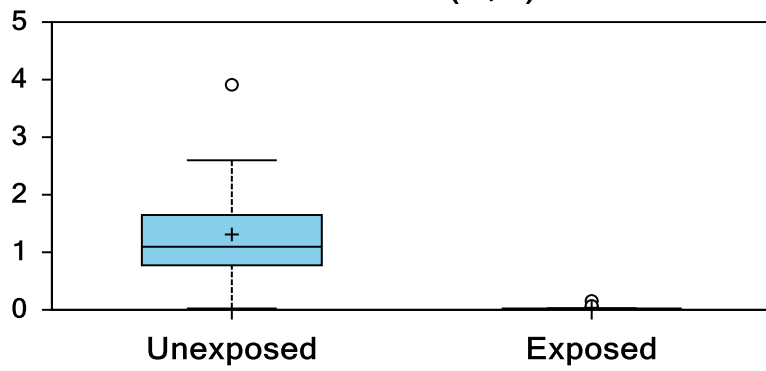

**bradykinin, des-arg(9)**

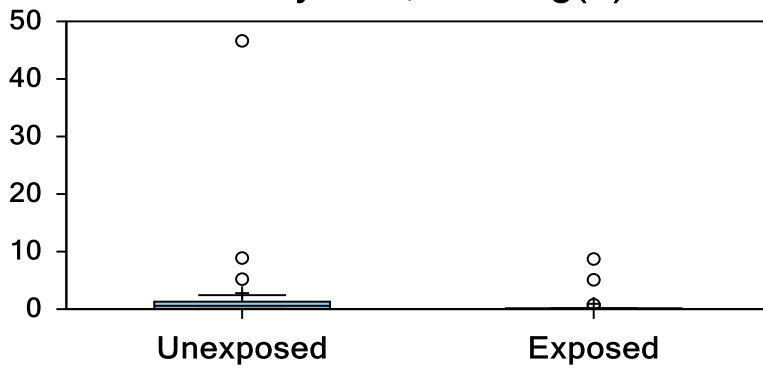

**caffeine**

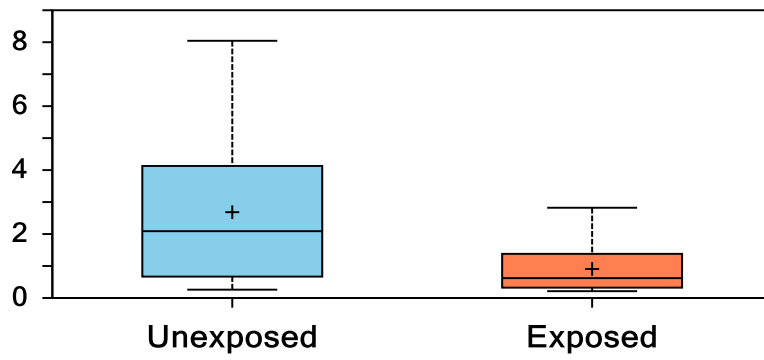

**caproate (6:0)**

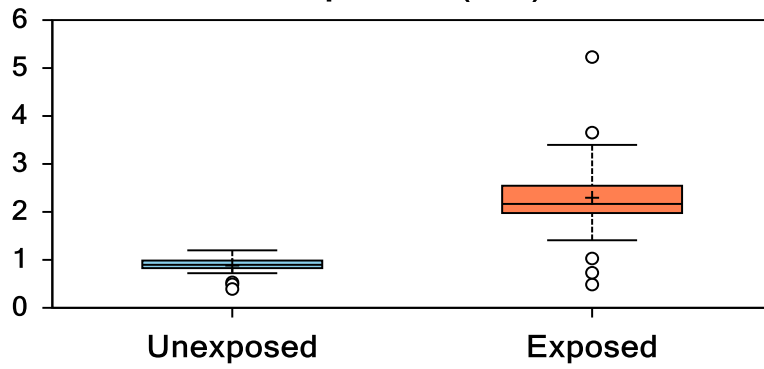

catechol sulfate

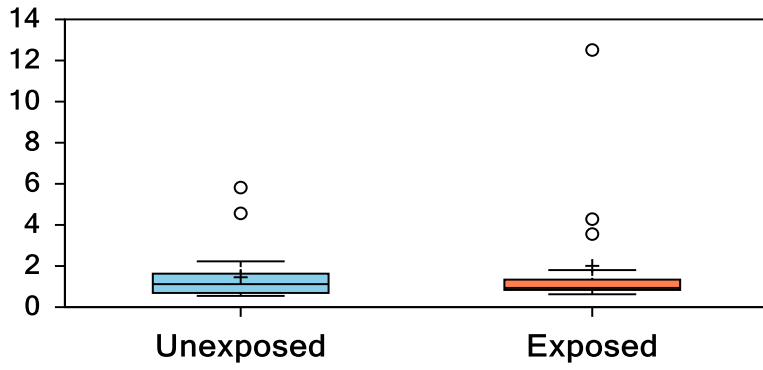

cholate

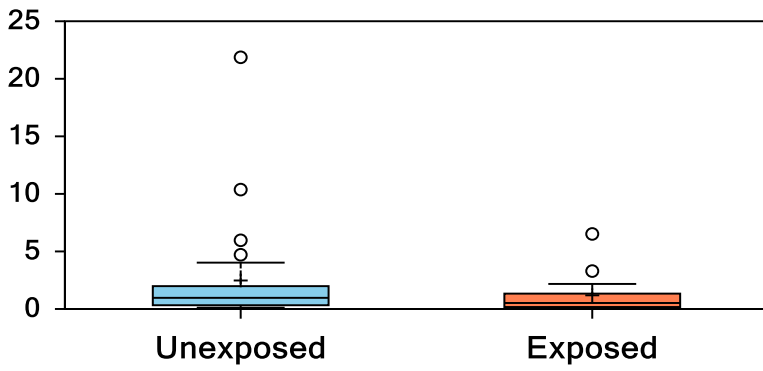

cinnamate

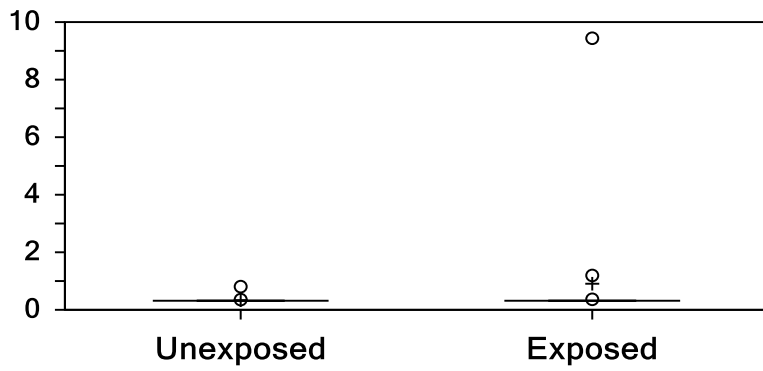

**cis-urocanate**

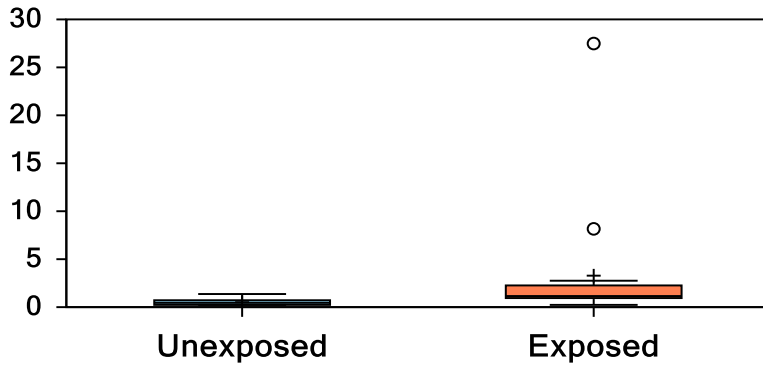

**citramalate**

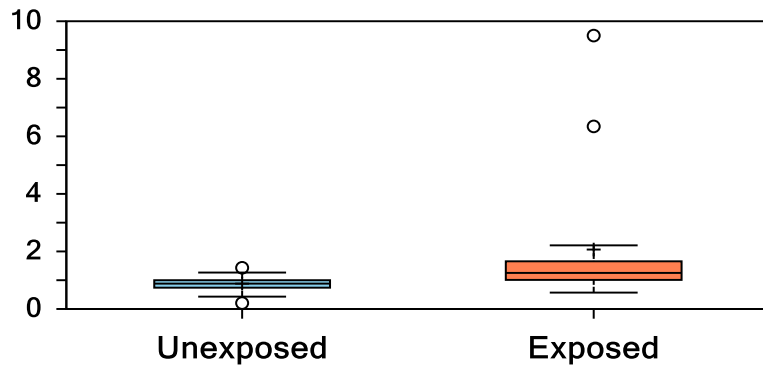

**corticosterone**

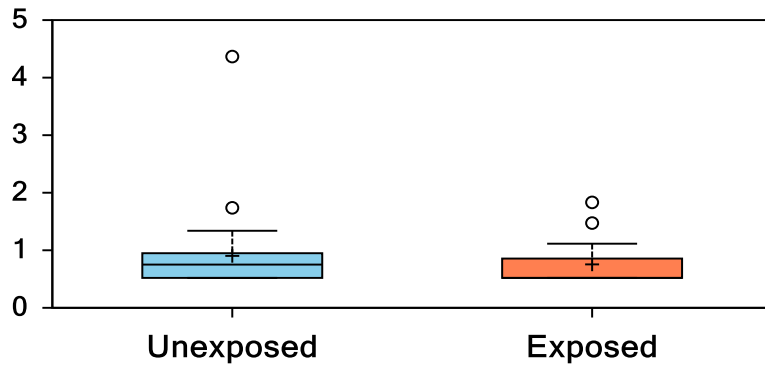

**cotinine**

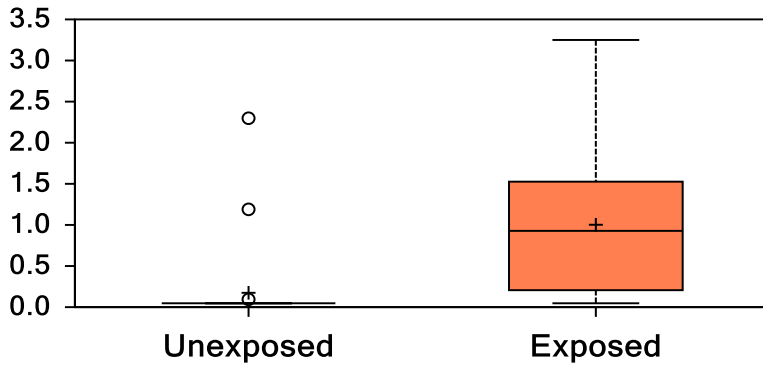

**creatinine**

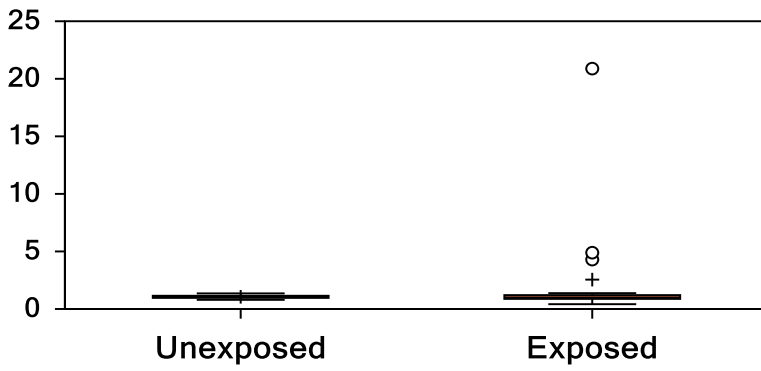

**cyclo(leu-pro)**

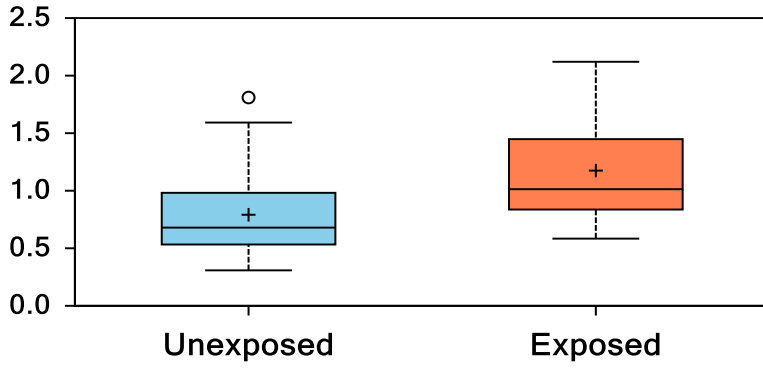



### cystine

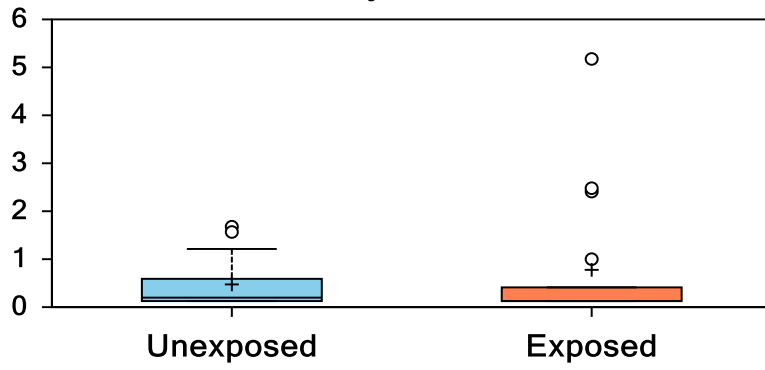

### deoxycarnitine

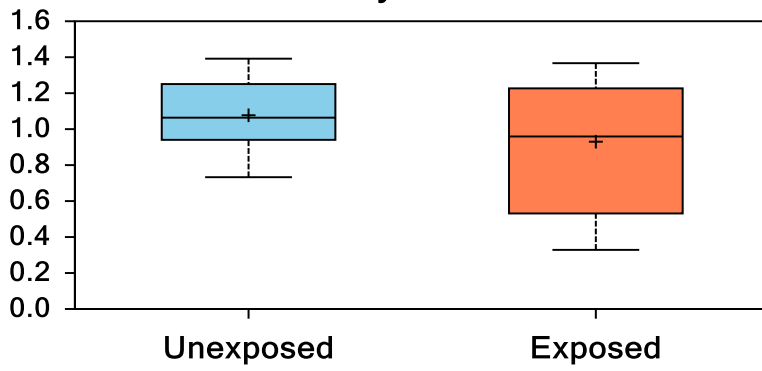

### diaminopimelate

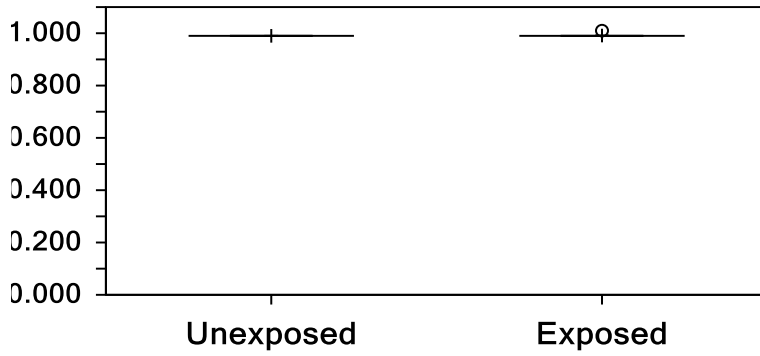

### dihydroferulic acid

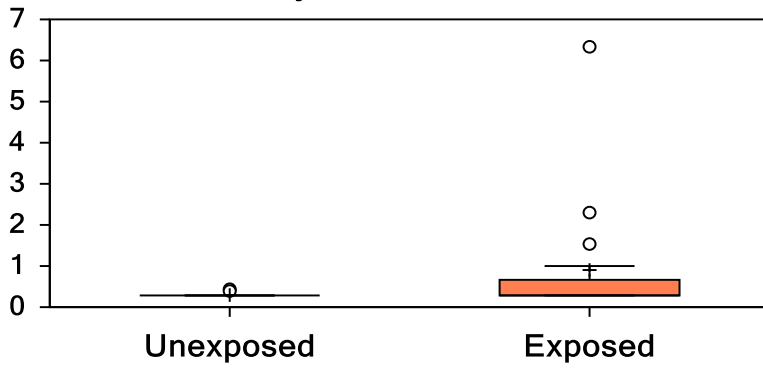

### diphenhydramine

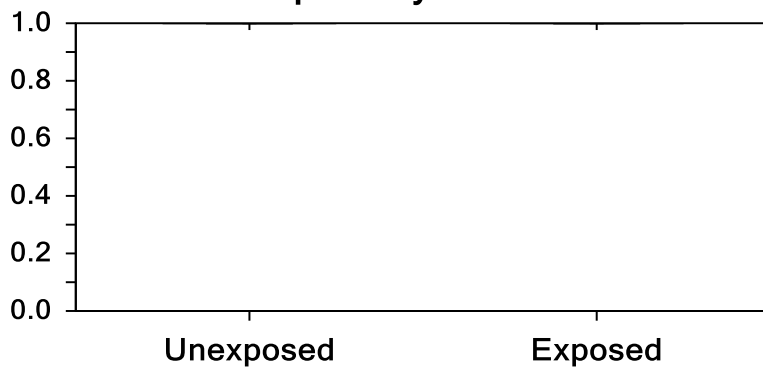

### docosapentaenoate (n3 DPA; 22:5n3)

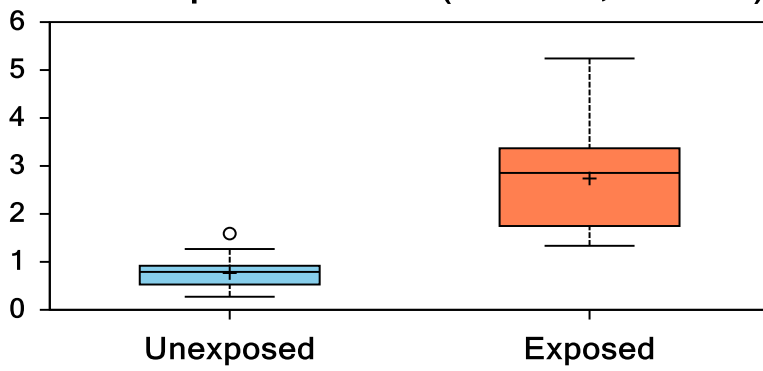

### DSGEGDFXAEGGGVR\*

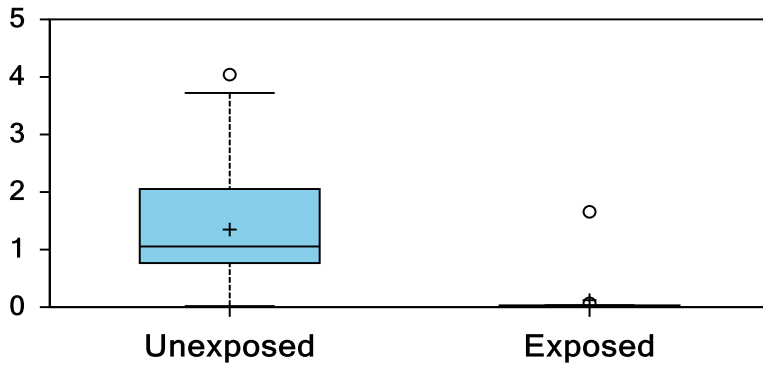

### eicosapentaenoate (EPA; 20:5n3)

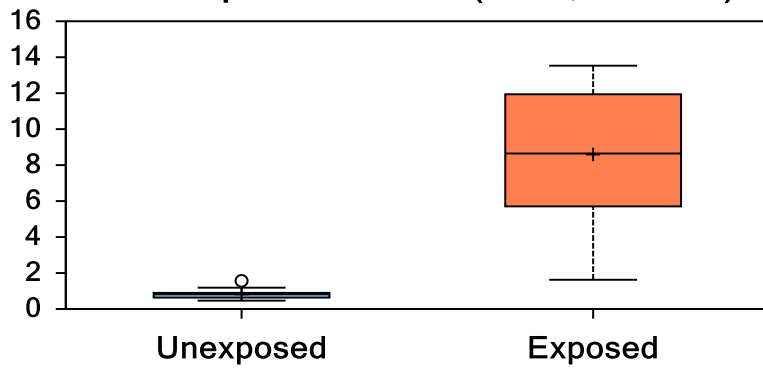

### ergothioneine

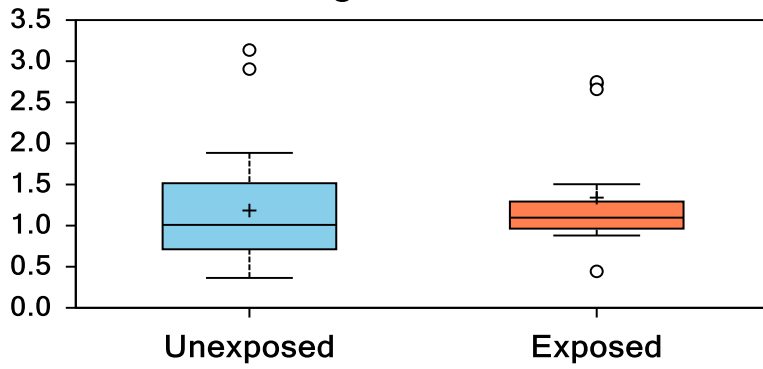

**erythro-sphingosine-1-phosphate**

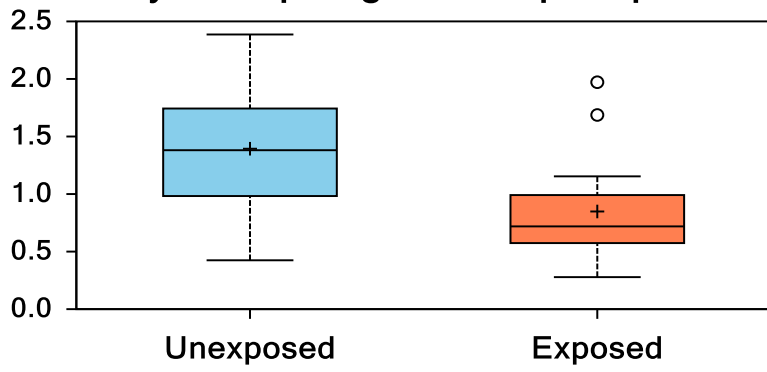

**fucose**

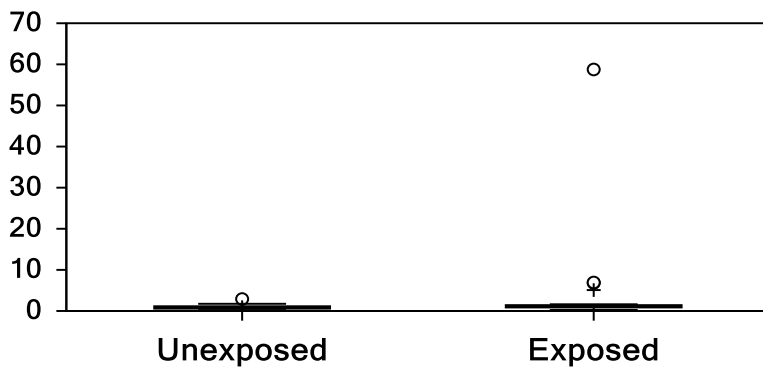

**gamma-CEHC**

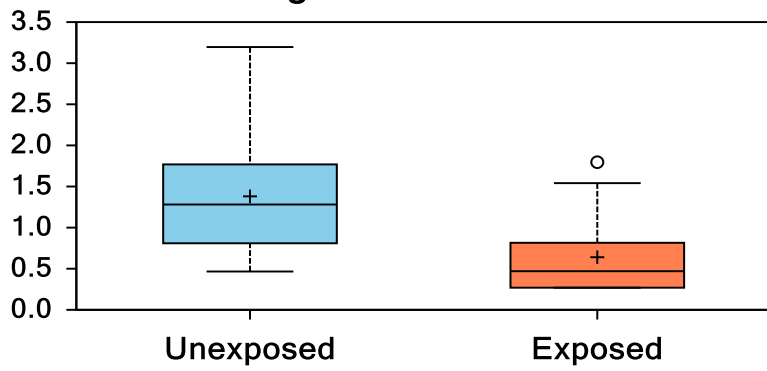

**gamma-glutamylglutamine**

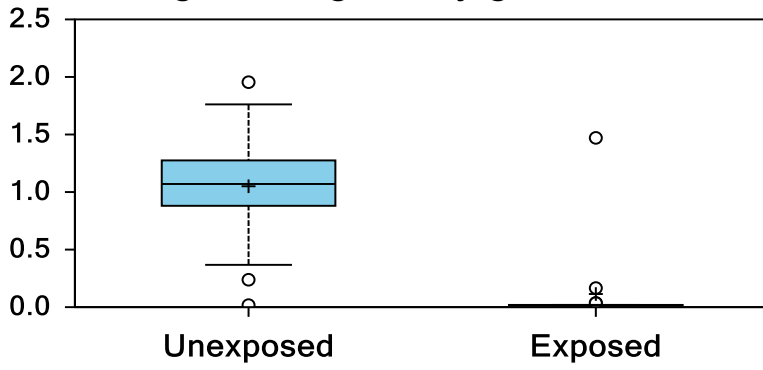

**gamma-glutamylmethionine**

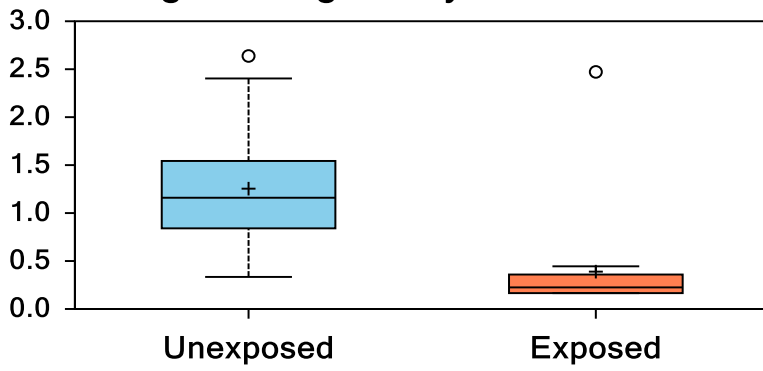

**gamma-glutamyltryptophan**

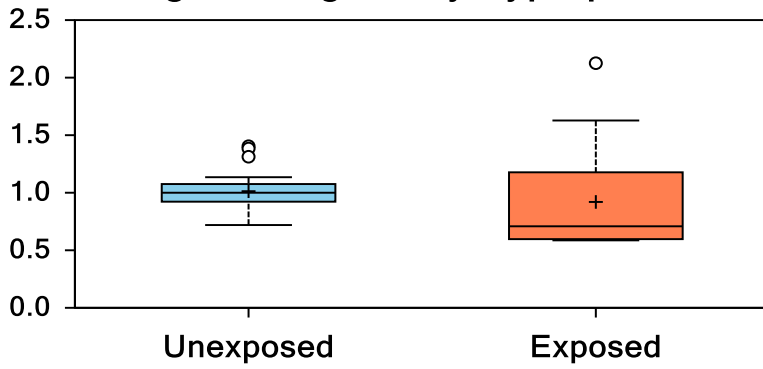

**gamma-tocopherol**

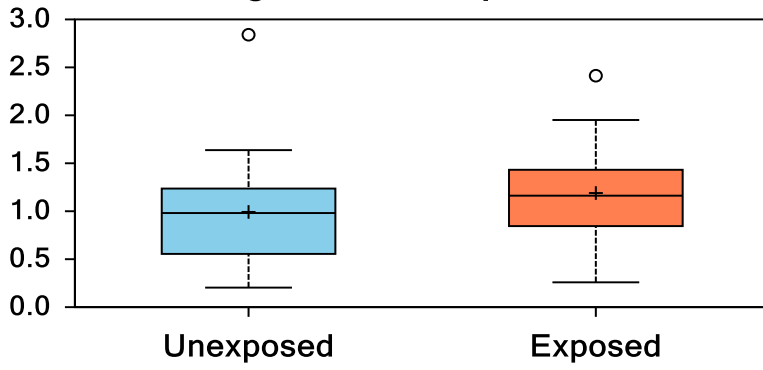

**gluconate**

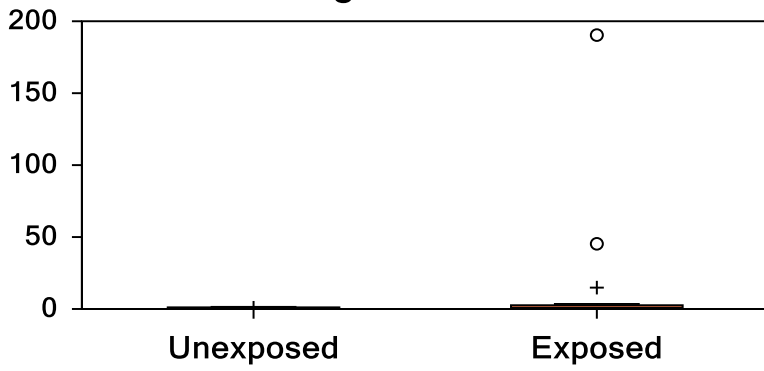

**glutamate**

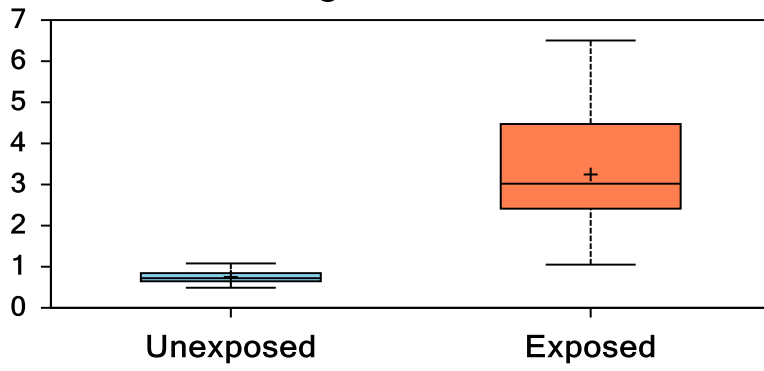

glutathione, oxidized (GSSG)

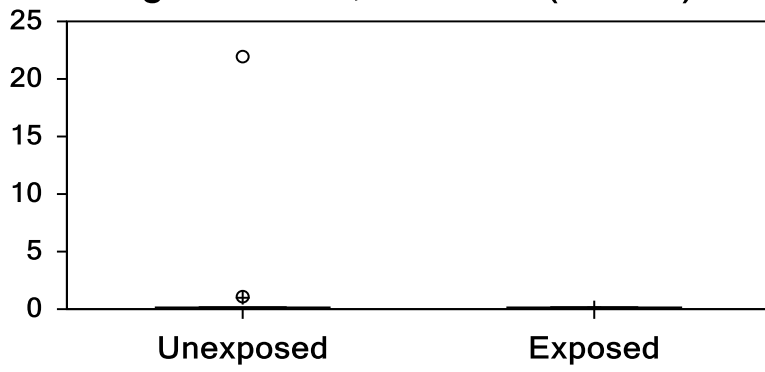

glycerol 2-phosphate

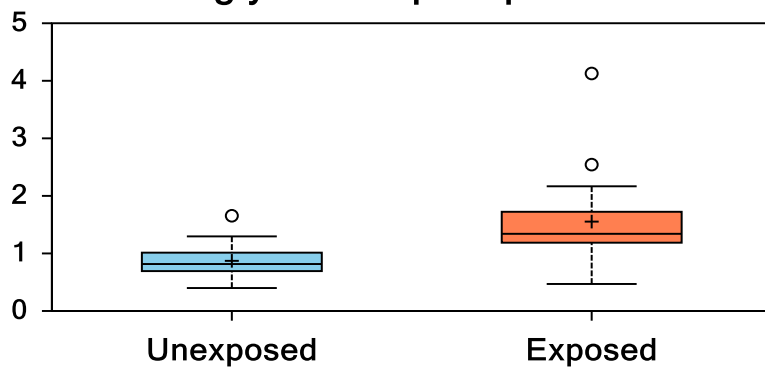

glycine

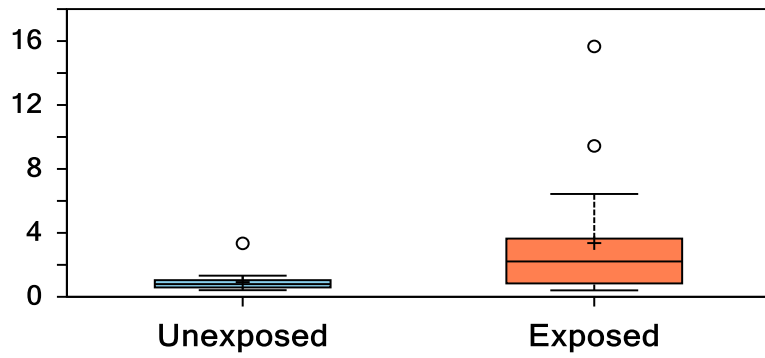

**glycocholenate sulfate\***

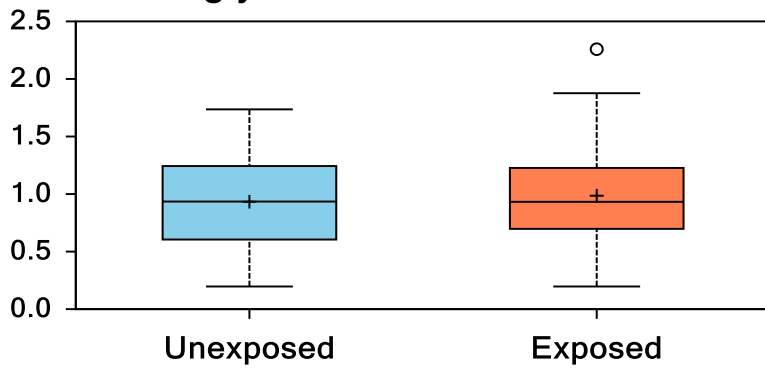

**glycolithocholate sulfate\***

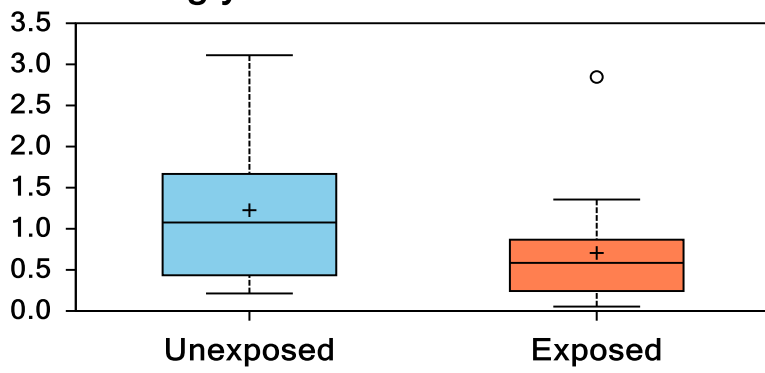

**glycylphenylalanine**

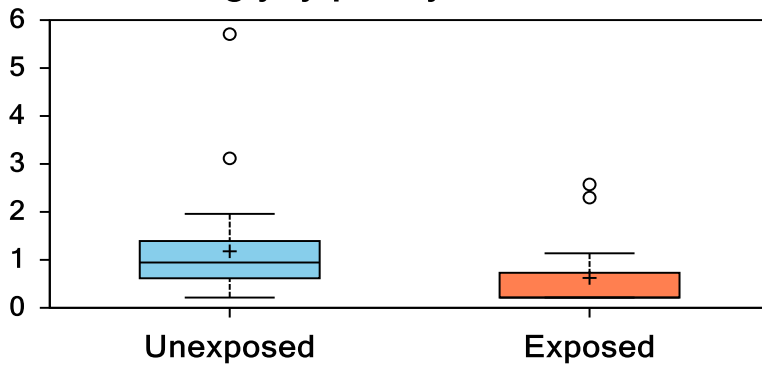



### glycyltyrosine

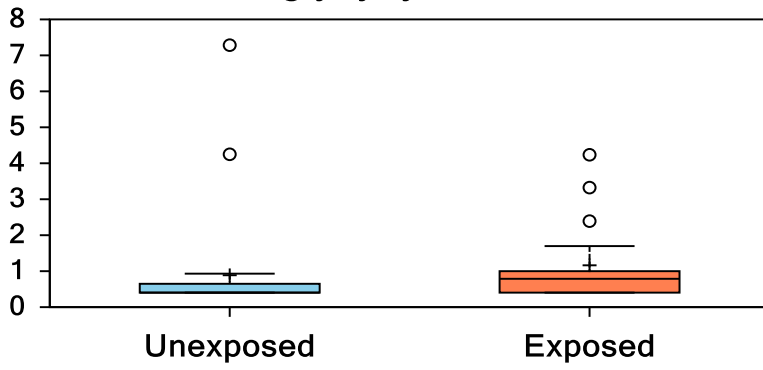

### heme\*

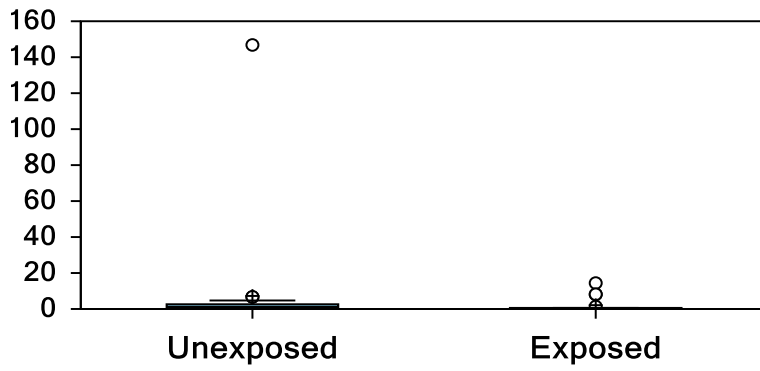

### hexanoylcarnitine

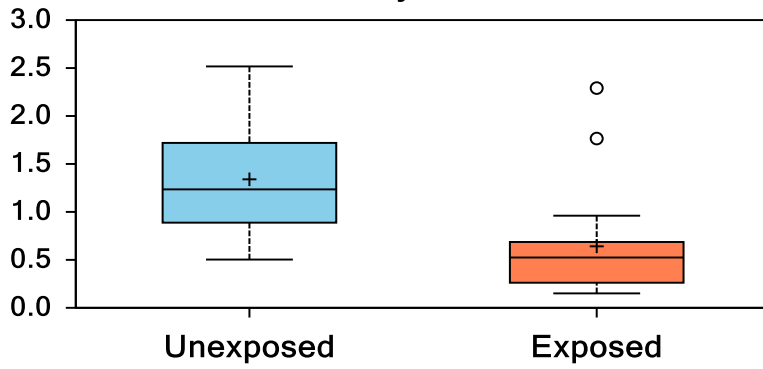

histidine

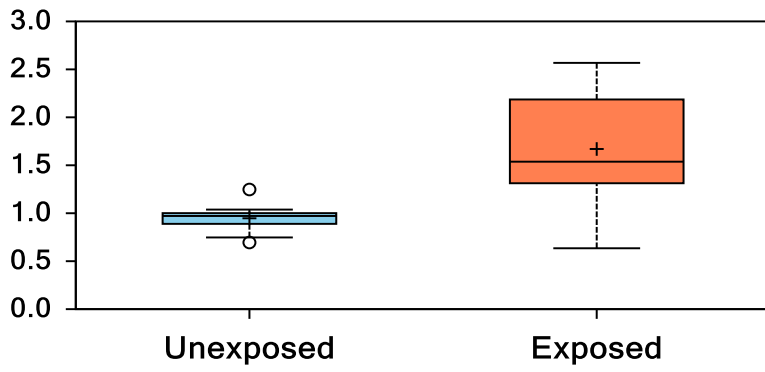

homocysteine

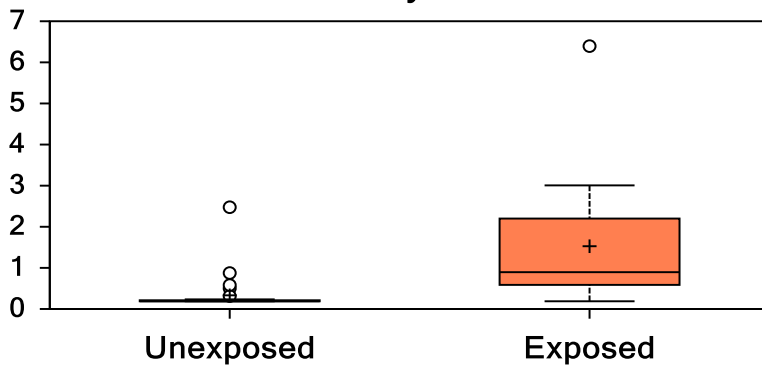

homostachydrine\*

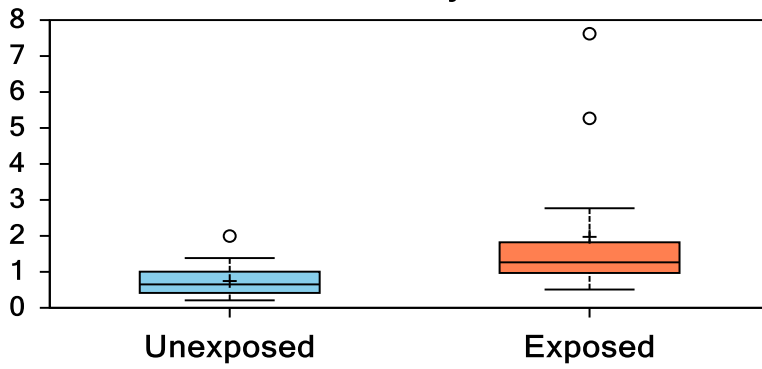

### HXGXA\*

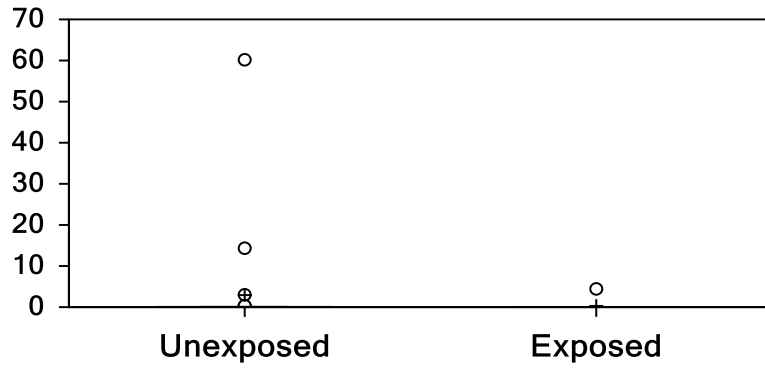

### hydroquinone sulfate

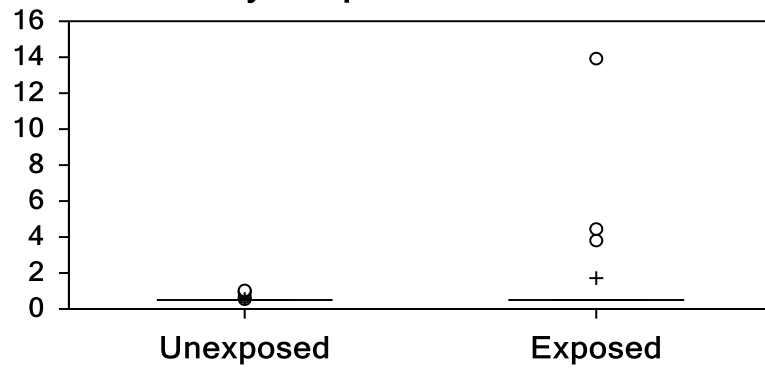

### hypoxanthine

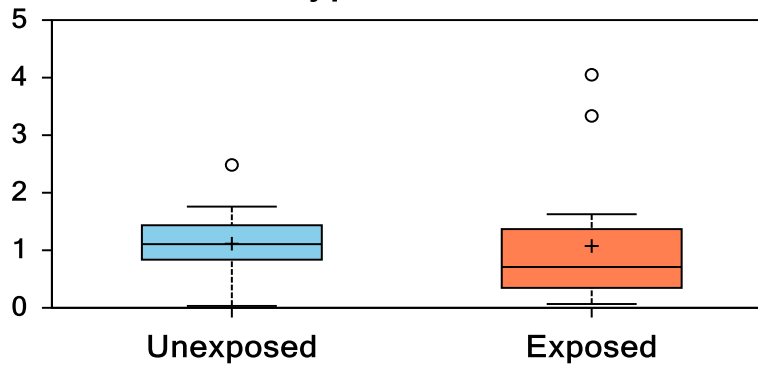

imidazole propionate

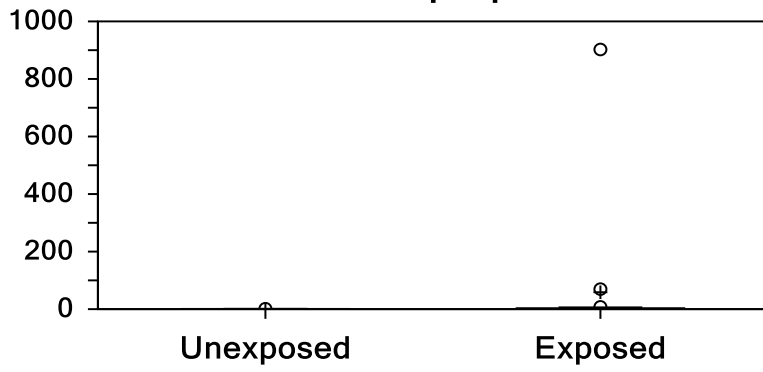

indoleacetate

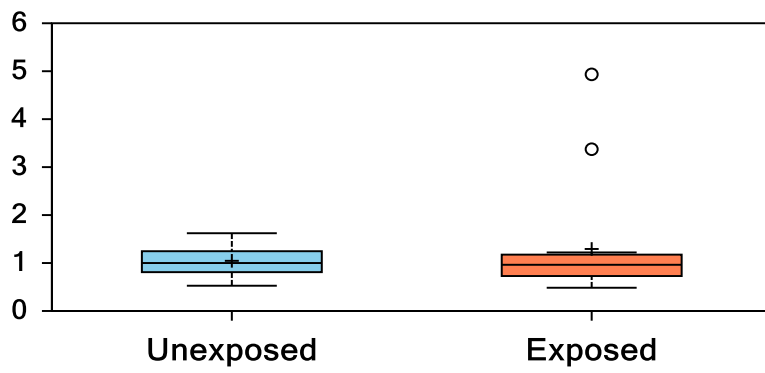

indolepyruvate

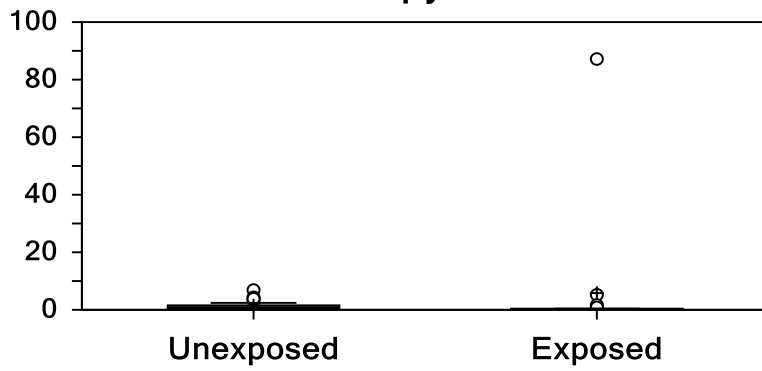

Isobar: pimelate, 3-methyladipate

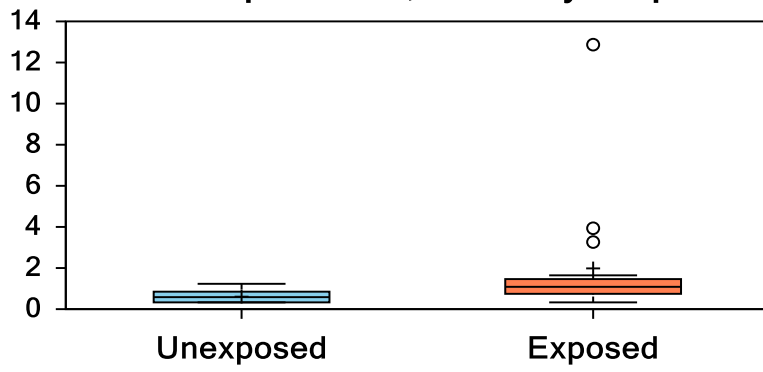

isocitrate

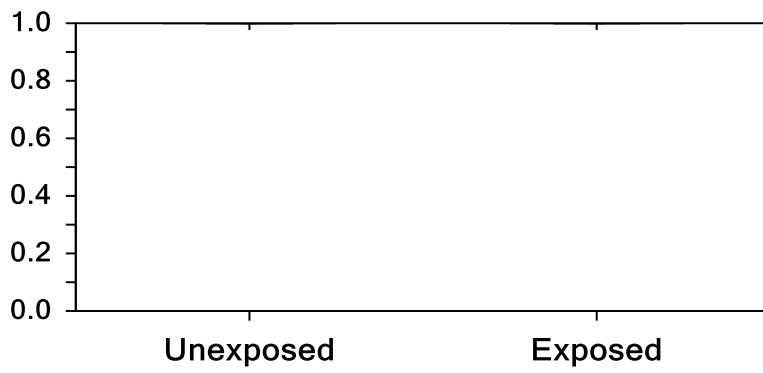

isoleucylglutamate

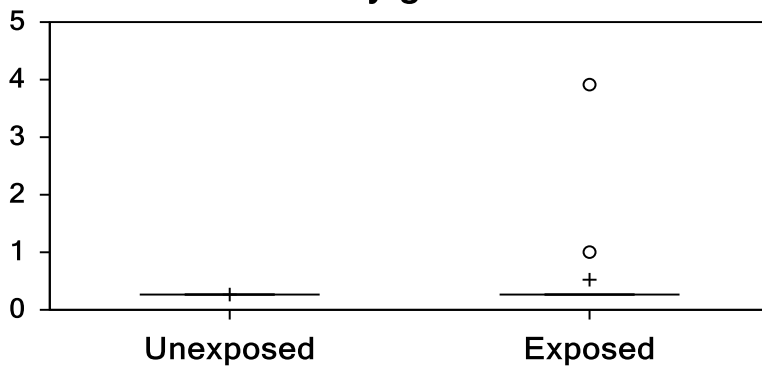

### isoleucylhistidine

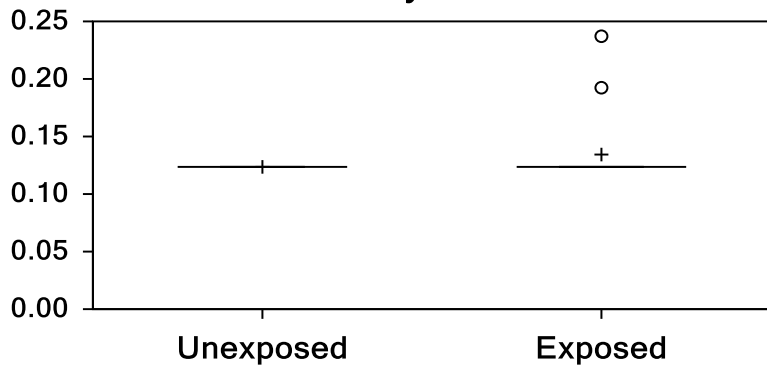

### isoleucylphenylalanine

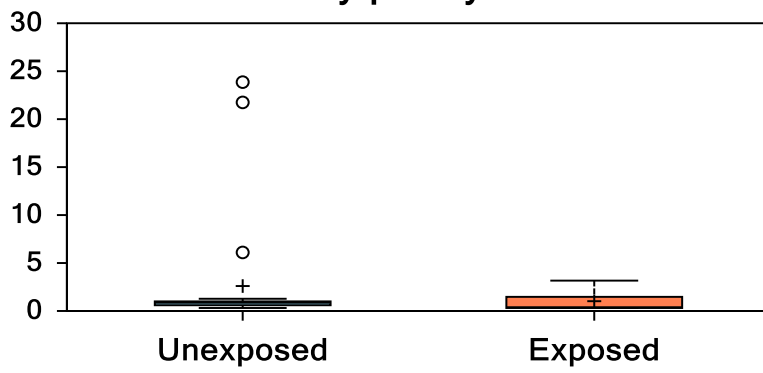

### isoleucylvaline

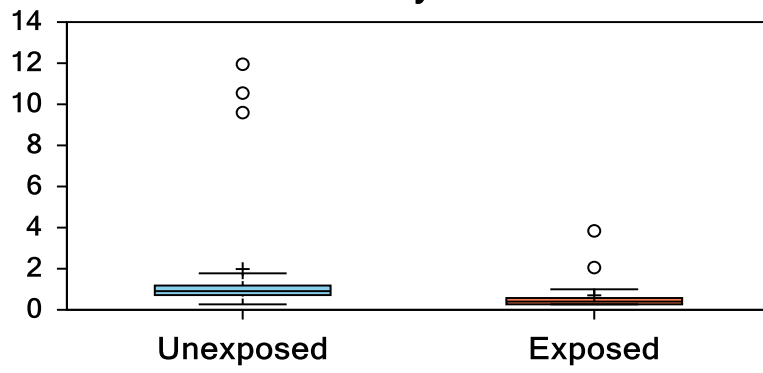

### isovalerylcarnitine

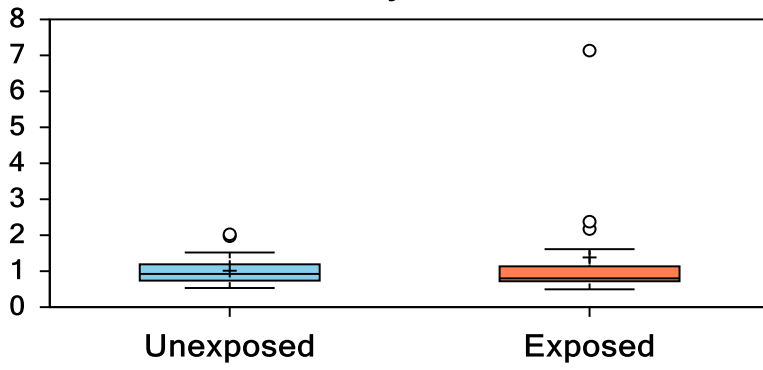

### kynurenate

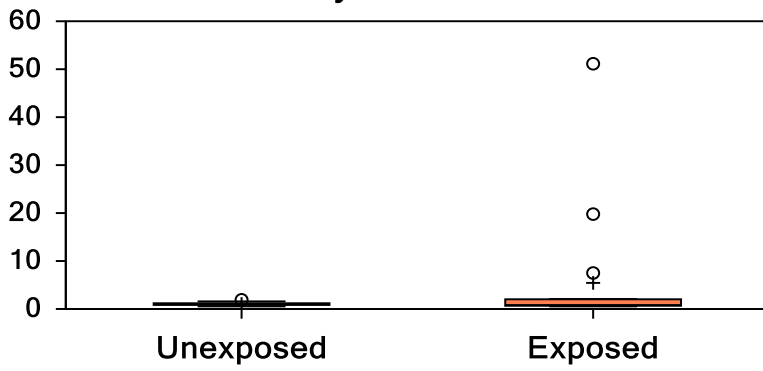

### lactose

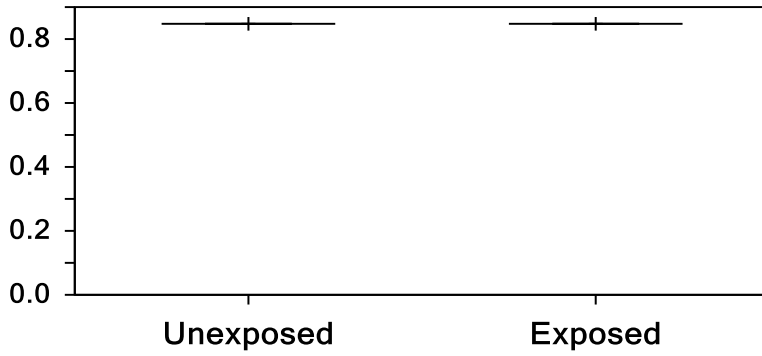

### laurylcarnitine

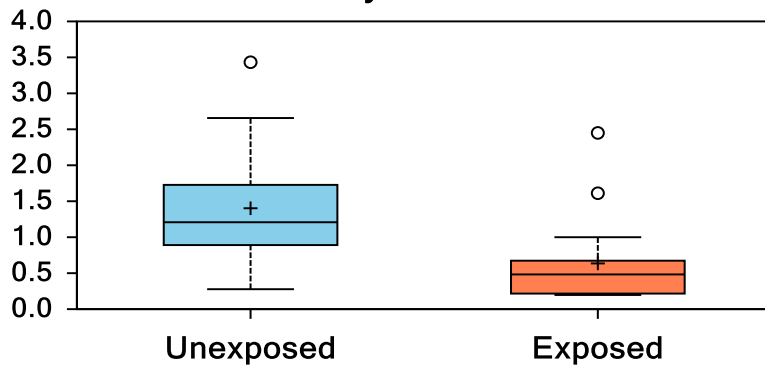

### leucylarginine

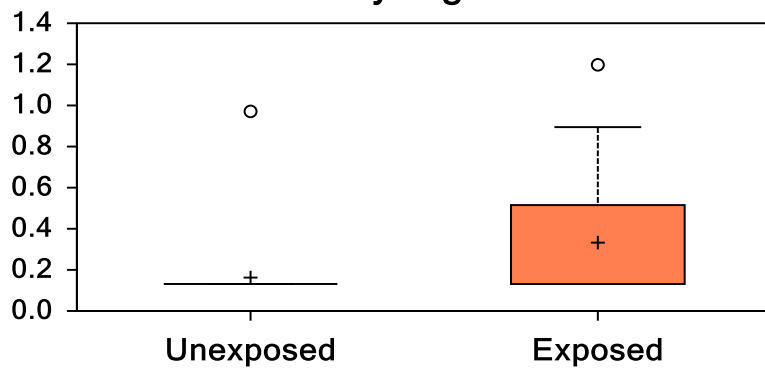

### leucylglutamate

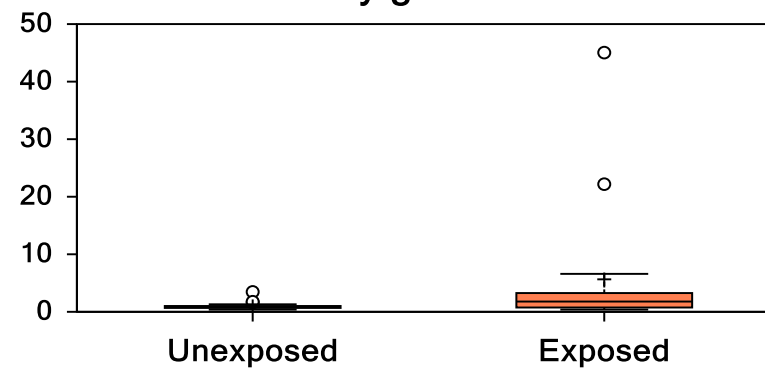



### leucylphenylalanine

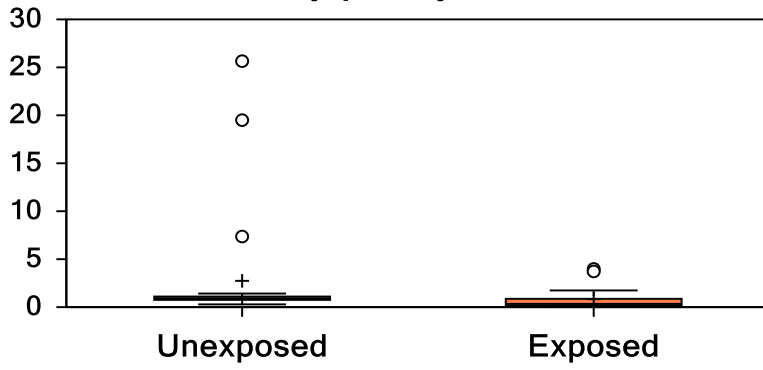

### leucyltryptophan

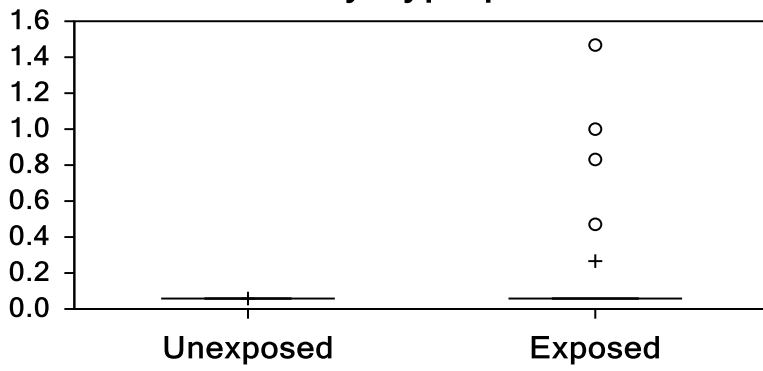

### levulinate (4-oxovalerate)

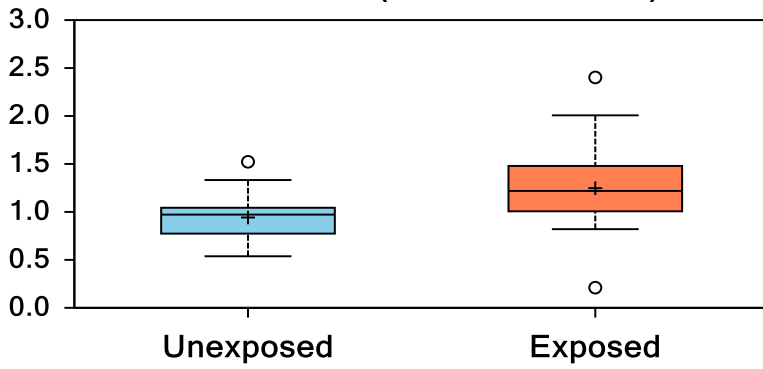

### linamarin

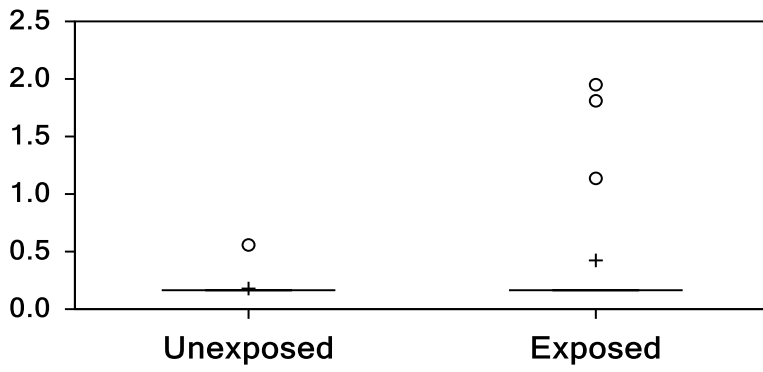

### L-urobilin

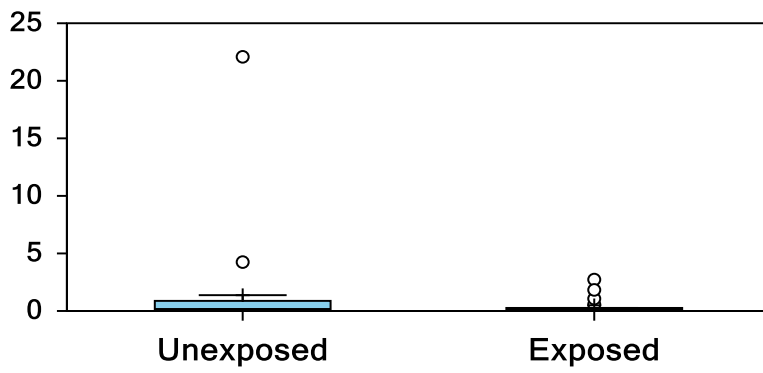

### malate

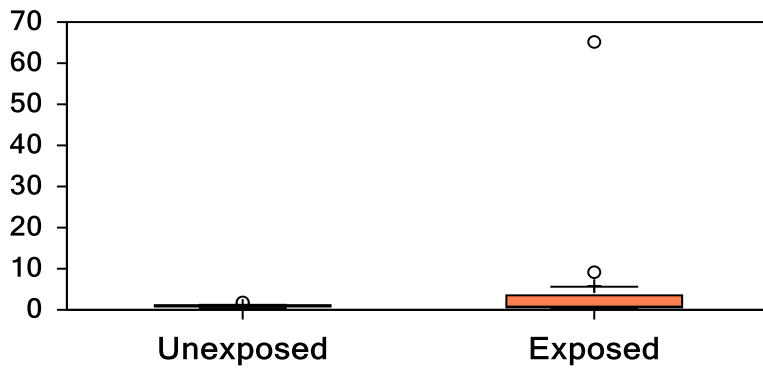

### mannitol

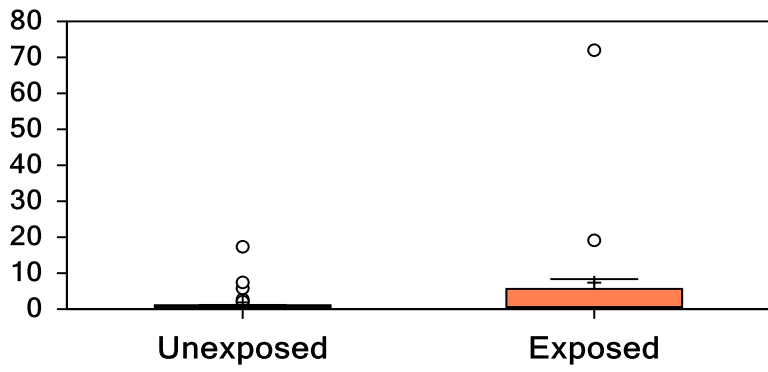

### metformin

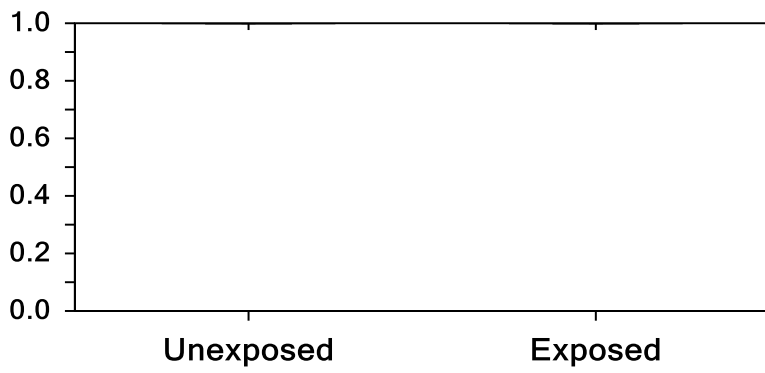

### methionylalanine

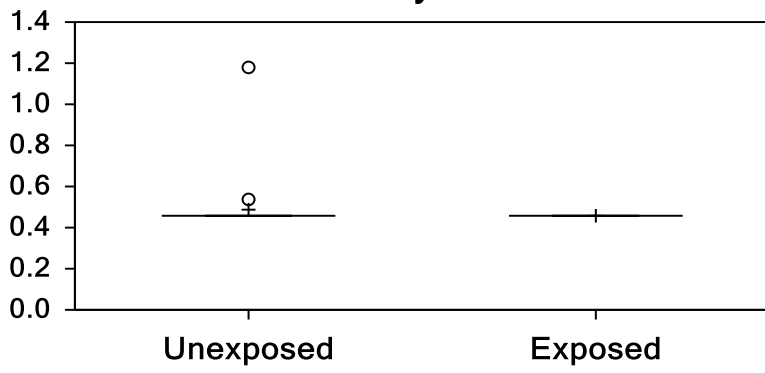

**methyl-beta-glucopyranoside**

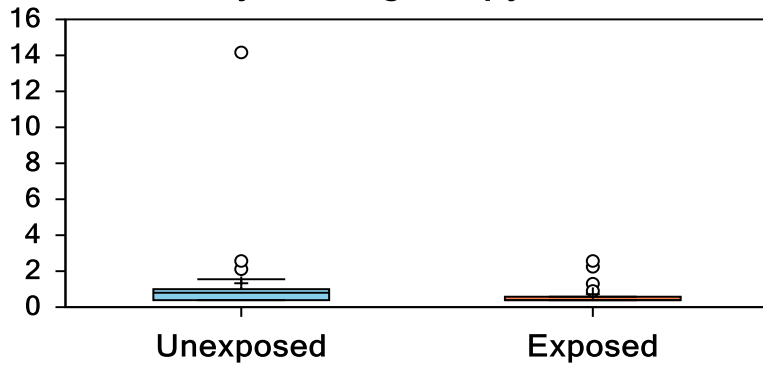

**metoprolol acid metabolite\***

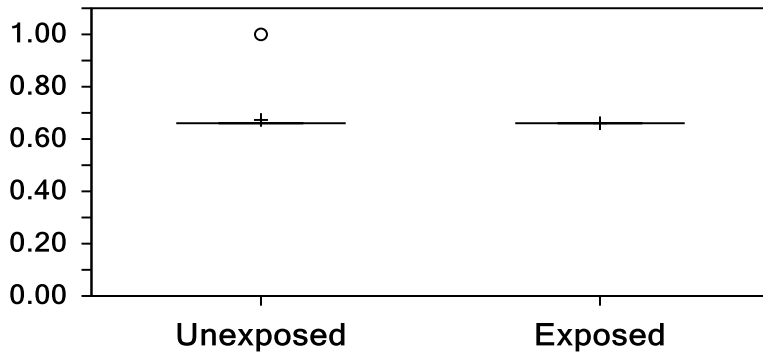

**myristoleate (14:1n5)**

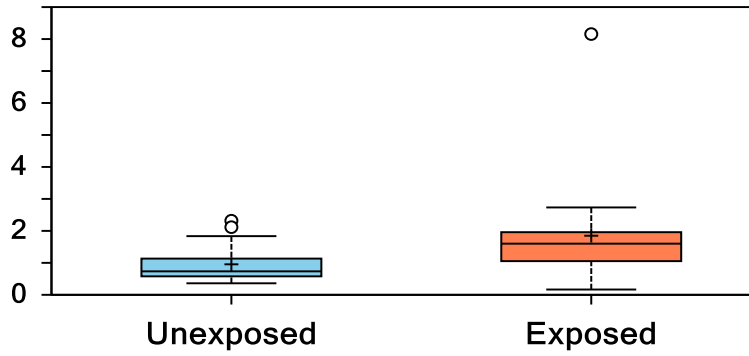

### N1-Methyl-2-pyridone-5-carboxamide

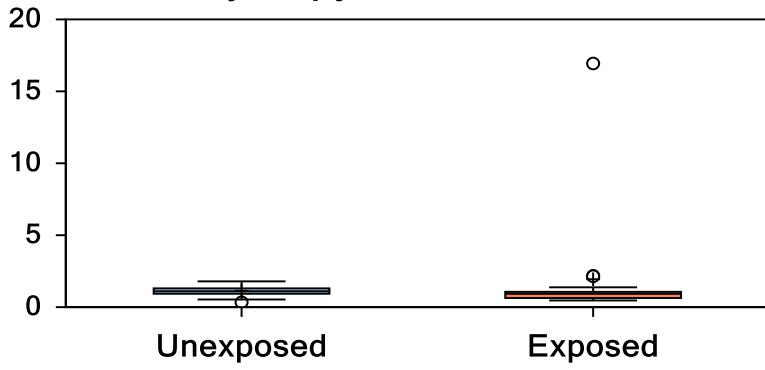

### N2,N2-dimethylguanosine

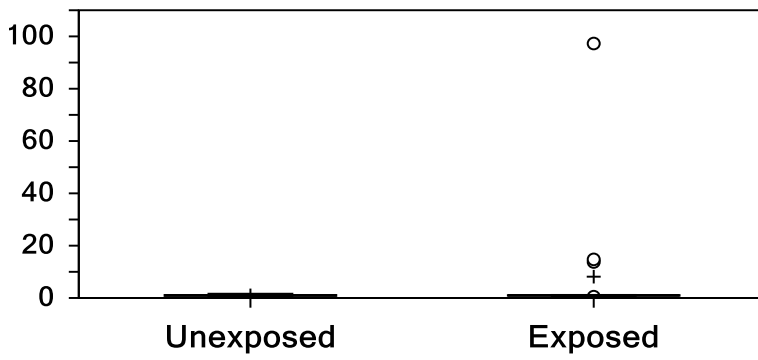

### N4-acetylcytidine

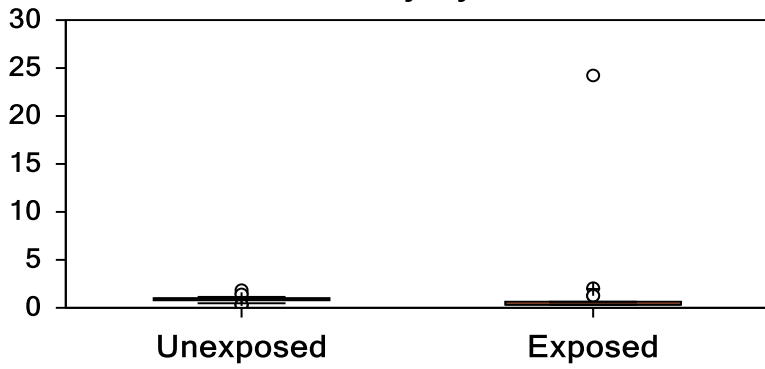

### N6-methyladenosine

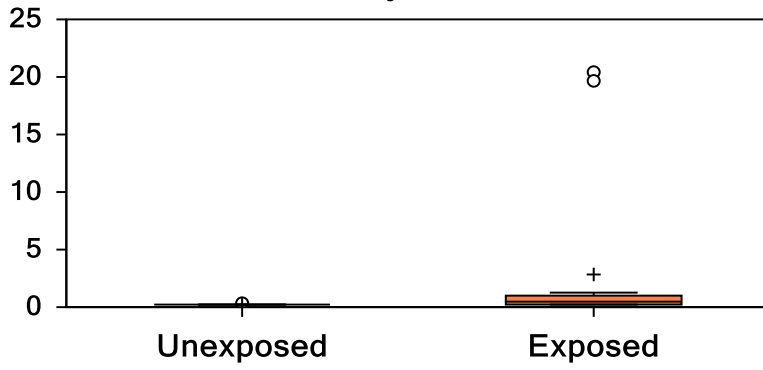

### N-acetylasparagine

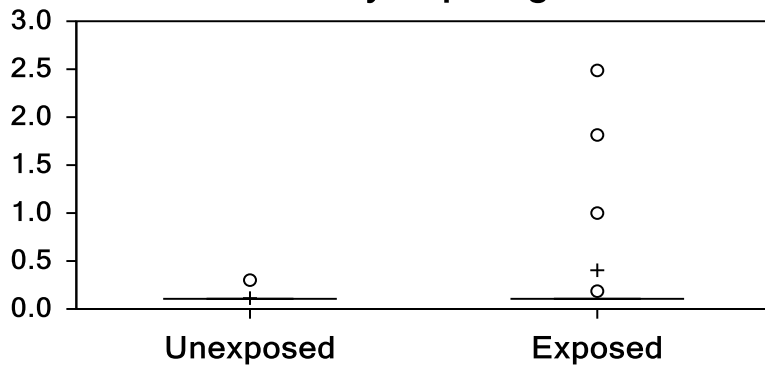

### N-acetylgalactosamine

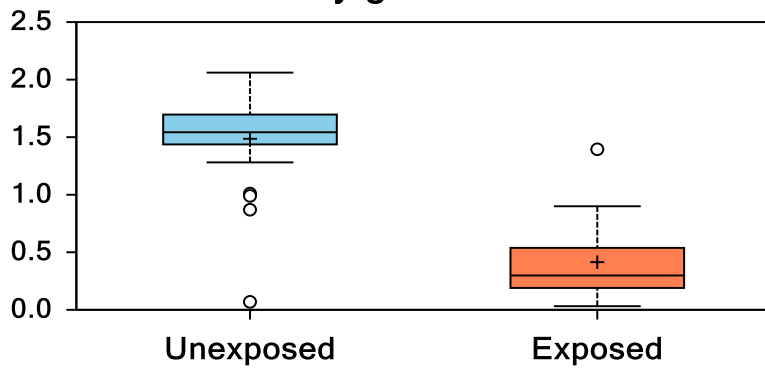

### N-acetylglycine

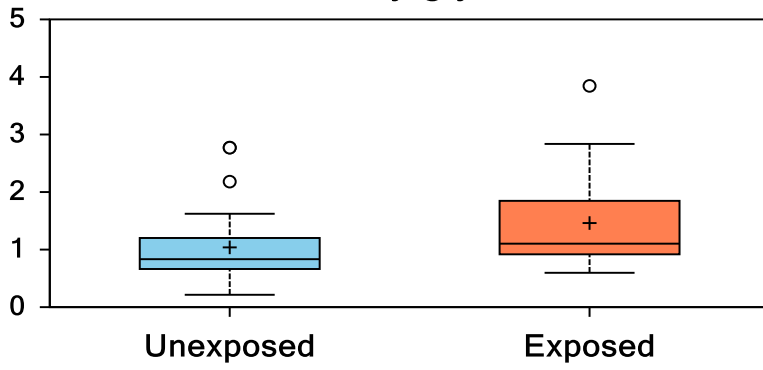

### N-acetylmethionine

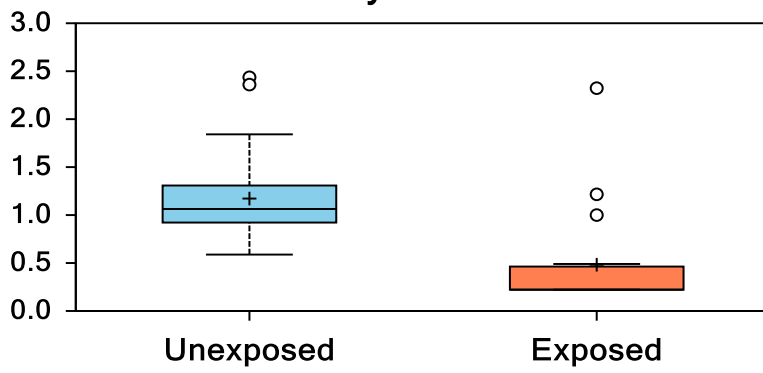

### N-acetylphenylalanine

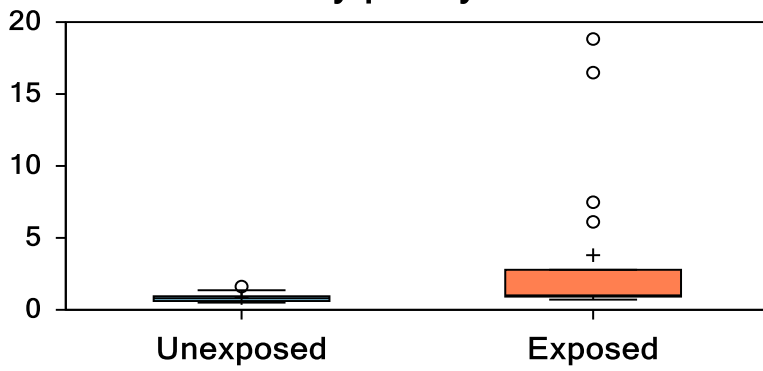

### N-acetylthreonine

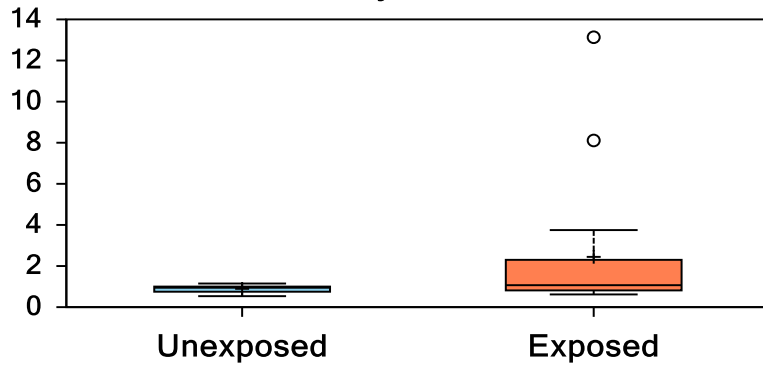

### naproxen

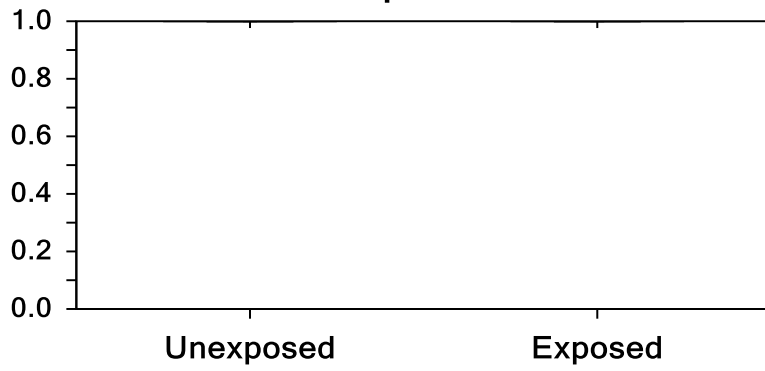

### N-formylmethionine

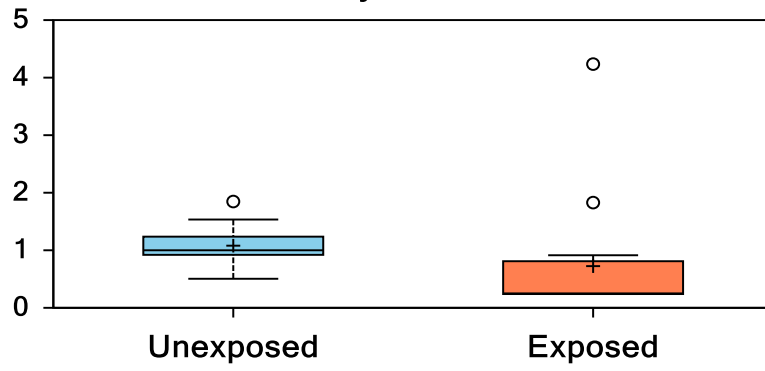



### nicotine

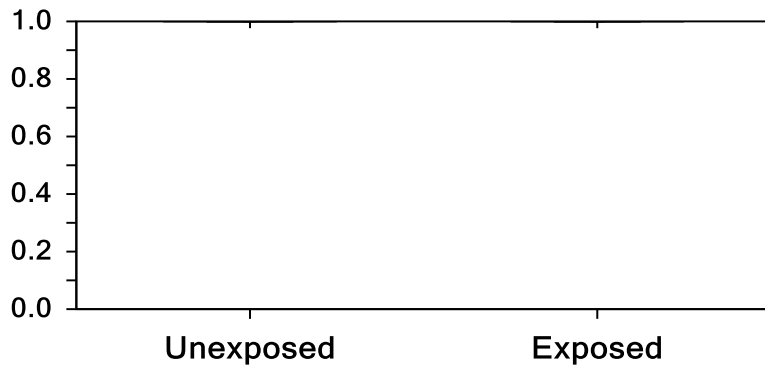

### nonadecanoate (19:0)

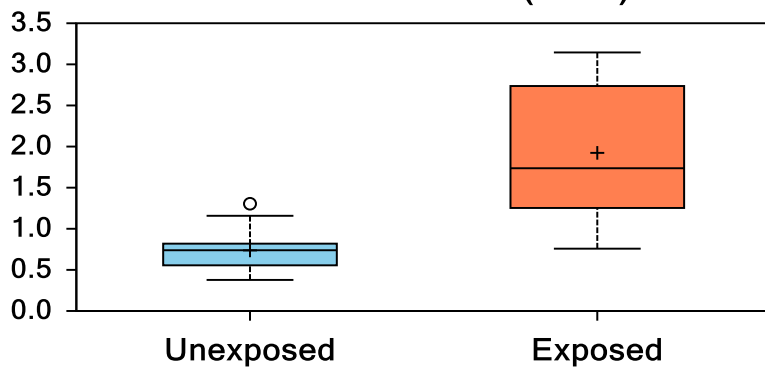

### octanoylcarnitine

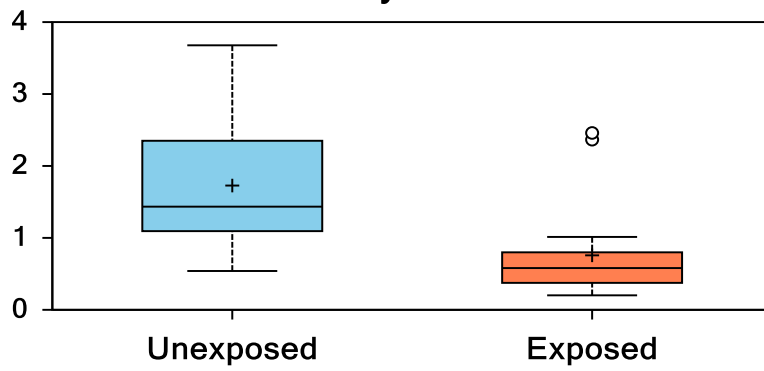

### oleoylcarnitine

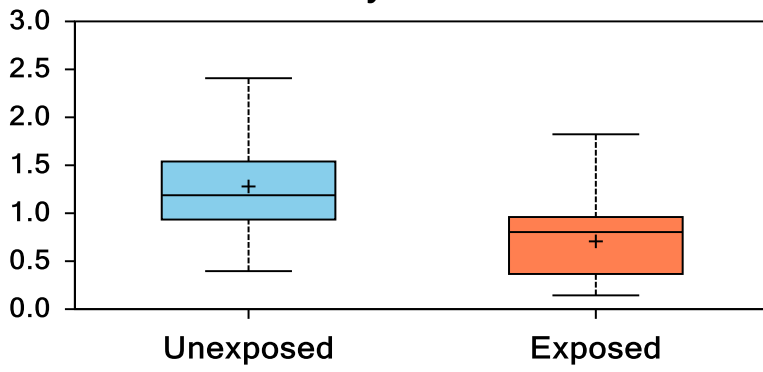

### orotate

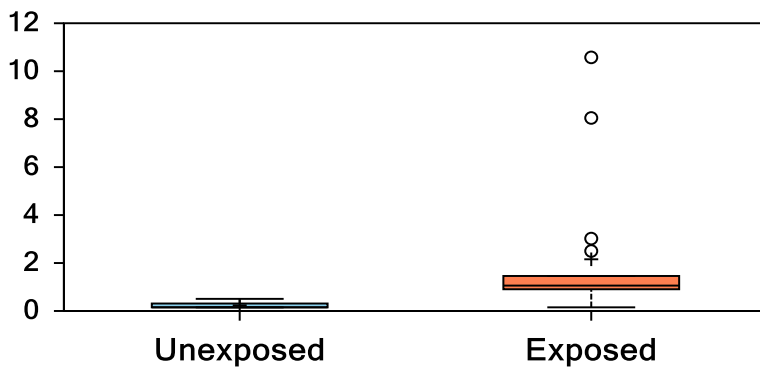

### palmitate, methyl ester

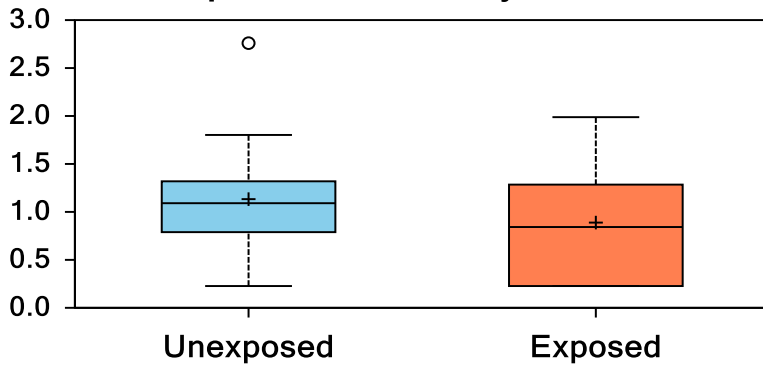

palmitoylcarnitine

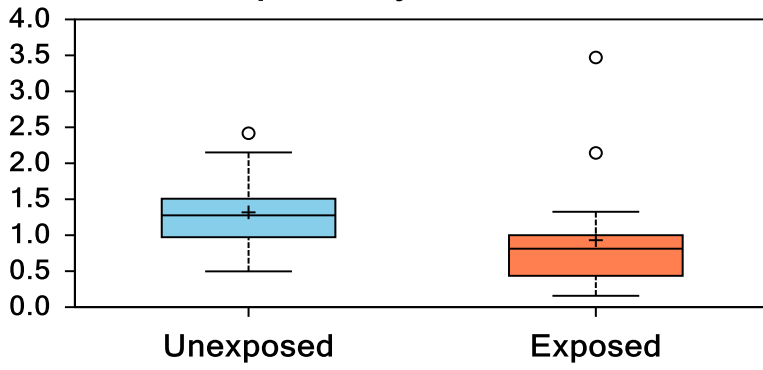

p-cresol sulfate

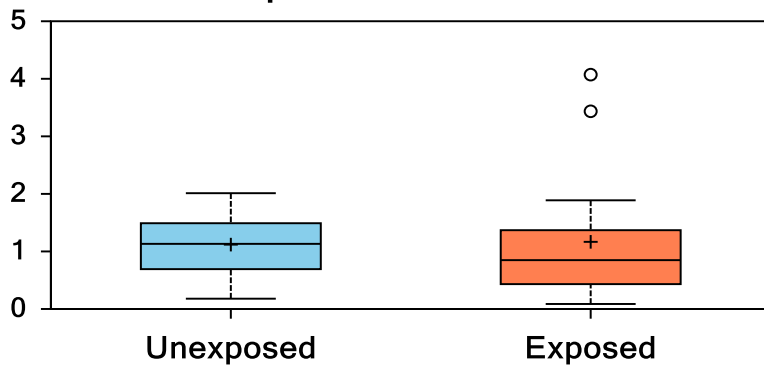

phenethylamine (isobar with 1-phenylethanolamine)

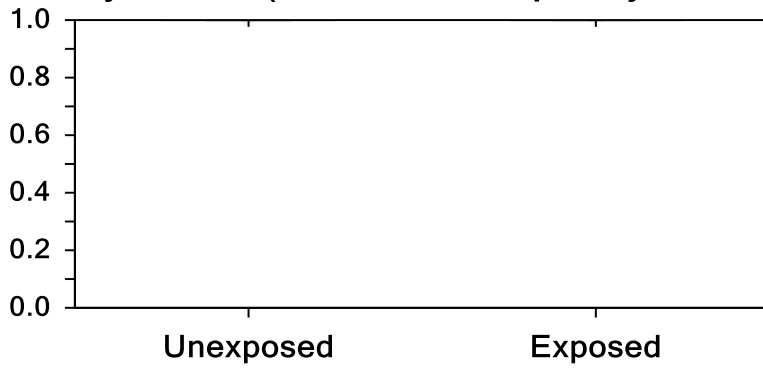

phenylacetate

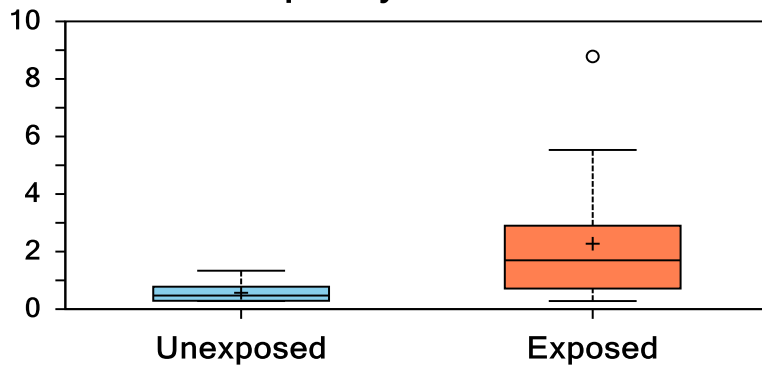

phenylalanine

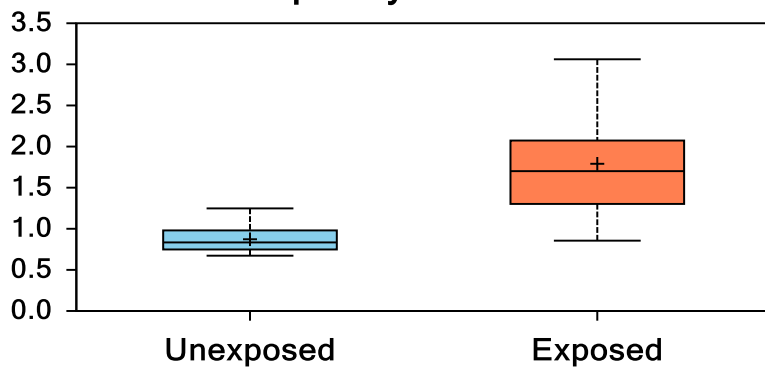

phenylalanylphenylalanine

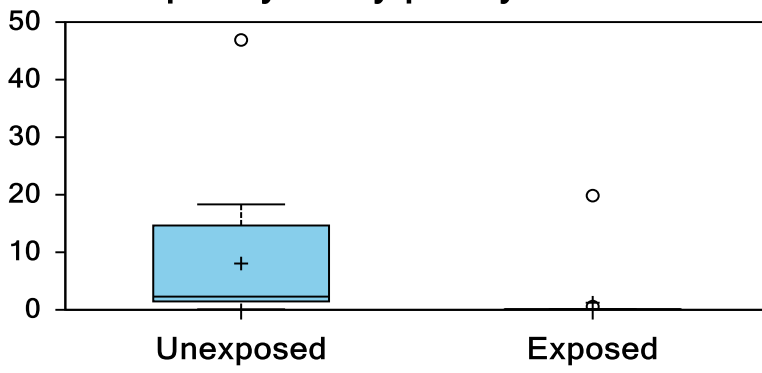

### phenylpropanolamine

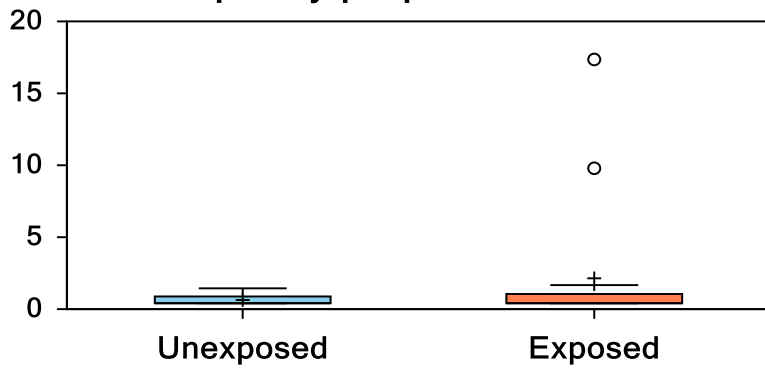

### phthalic acid

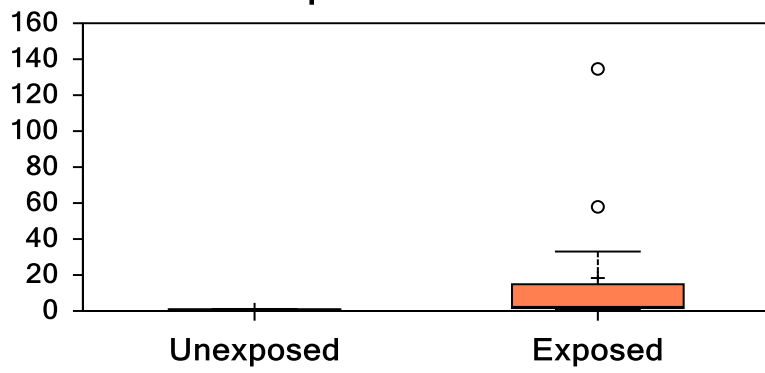

### pipecolate

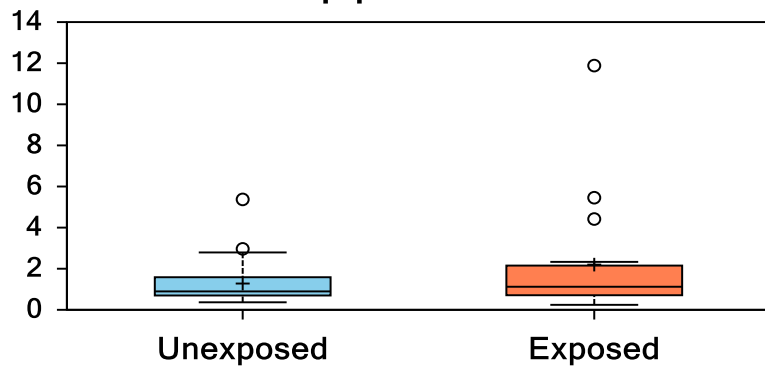

pregnenediol-3-glucuronide

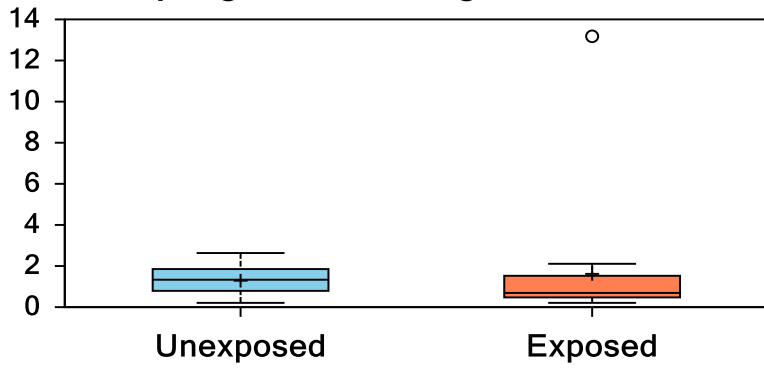

pro-hydroxy-pro

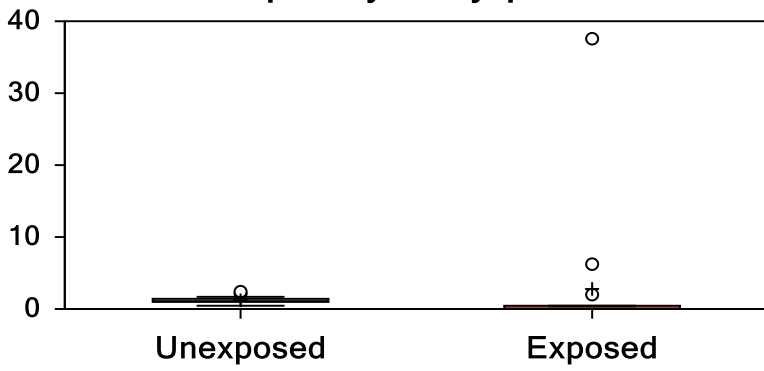

prolylleucine

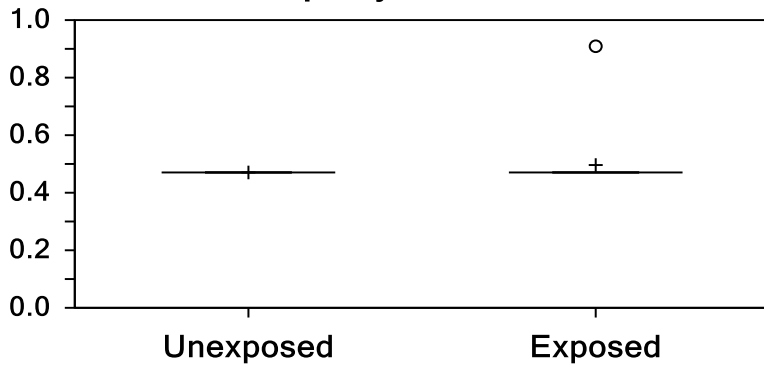

pseudouridine

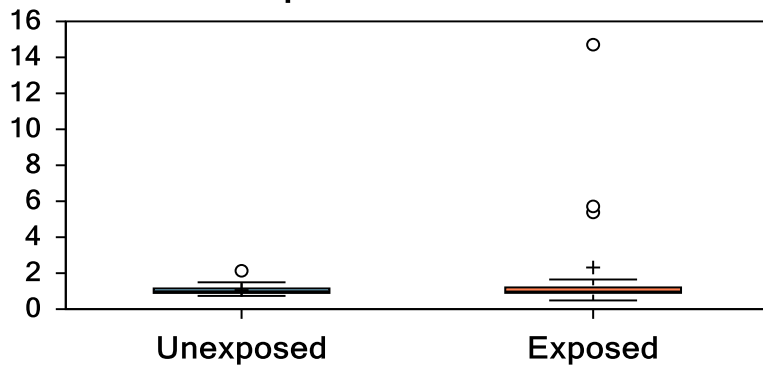

pyroglutamine\*

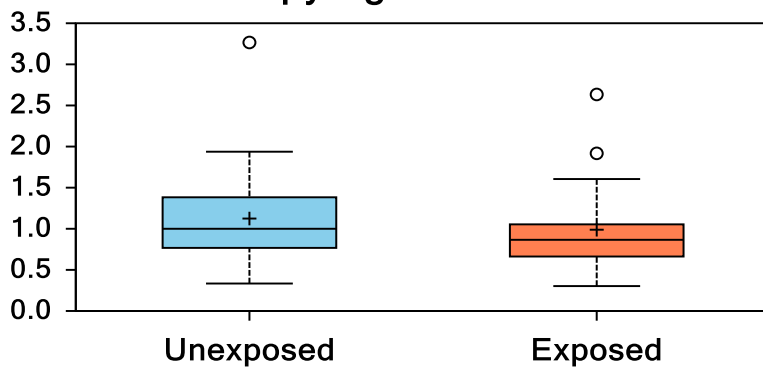

pyroglutamyvaline

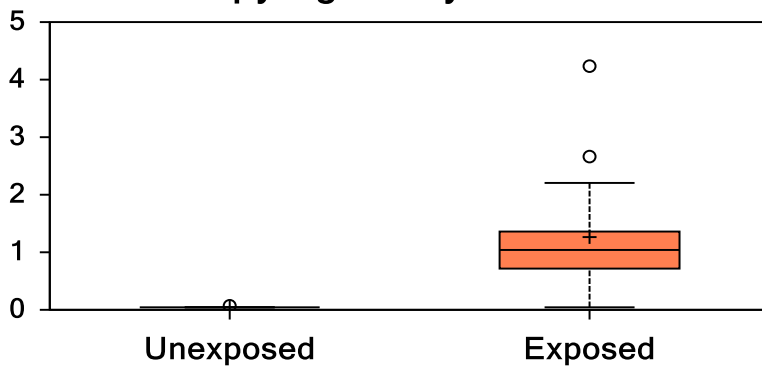

quinolinate

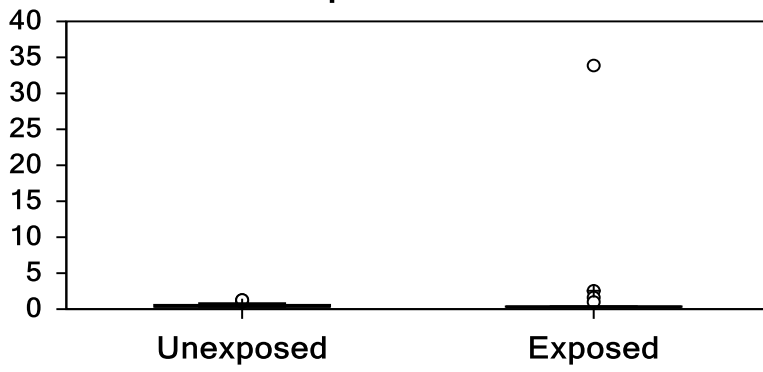

riboflavin (Vitamin B2)

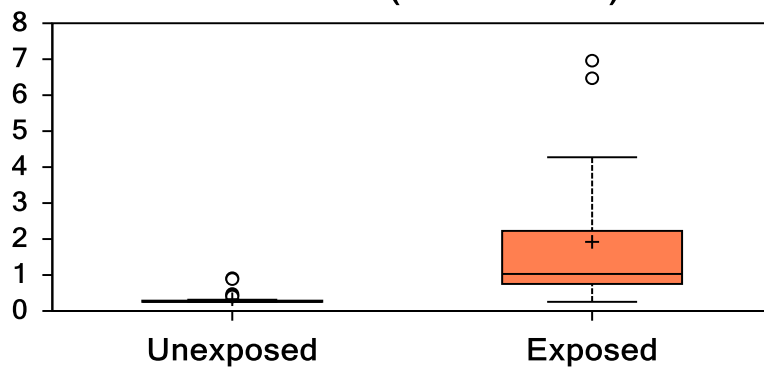

salicylate

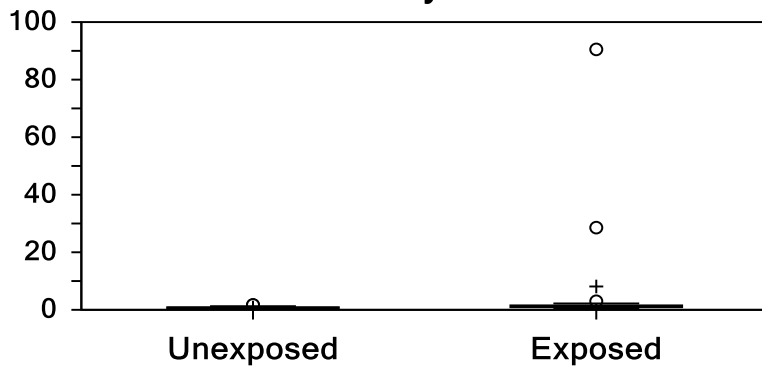



### scyllo-inositol

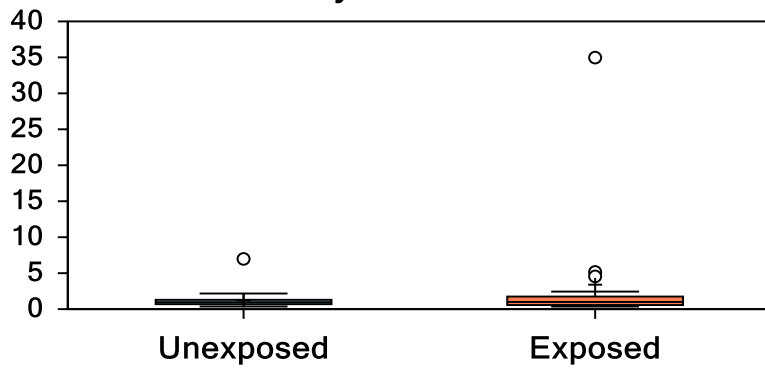

### serotonin (5HT)

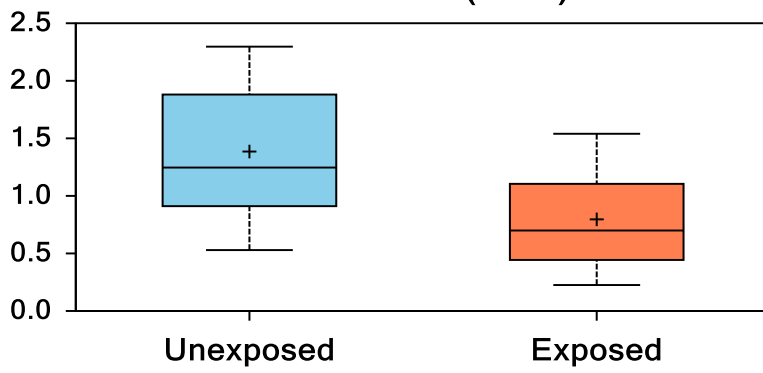

### serylphenyalanine

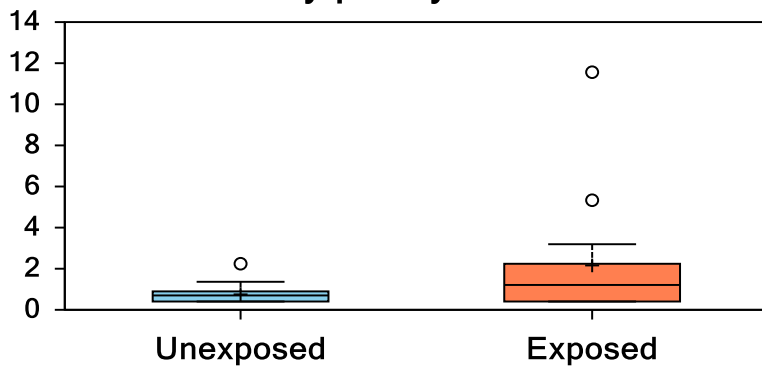

sphinganine

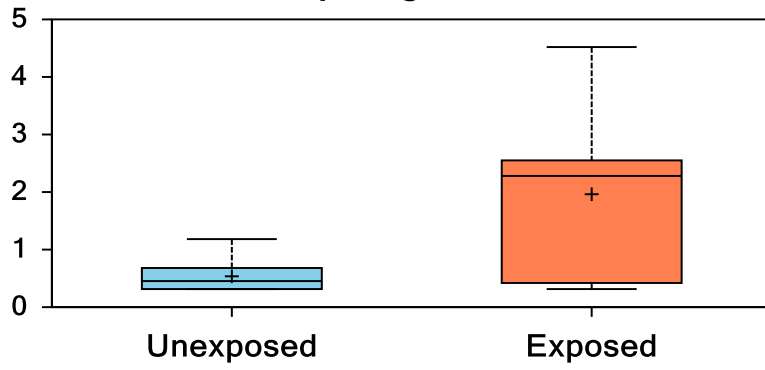

stachydrine

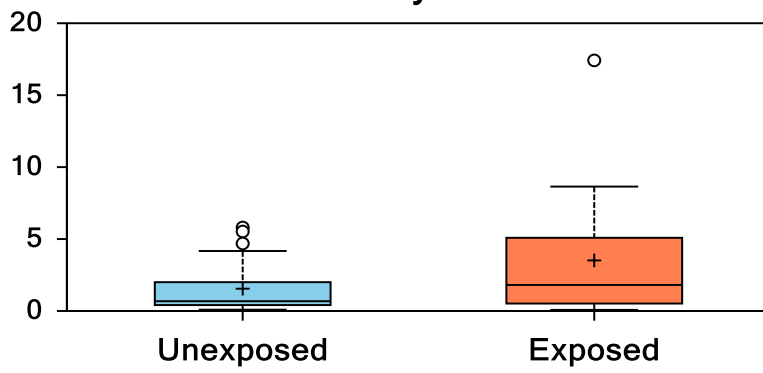

stearidonate (18:4n3)

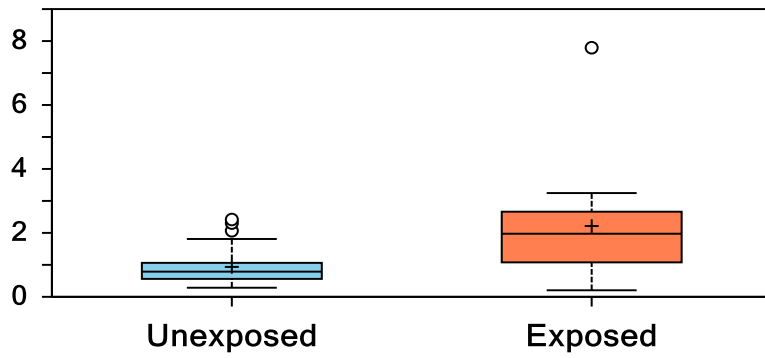

**suberate (octanedioate)**

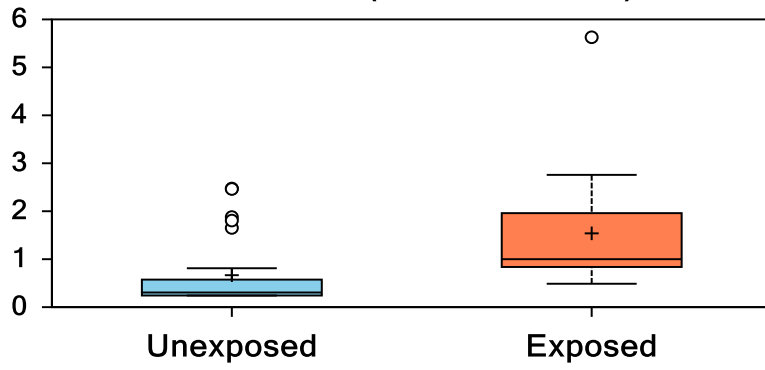

**sucrose**

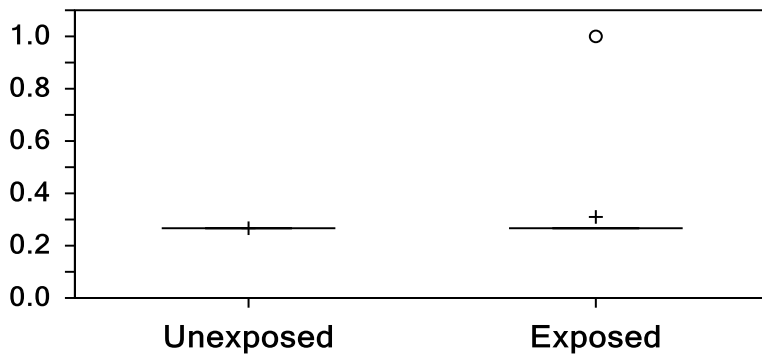

**taurocholenate sulfate\***

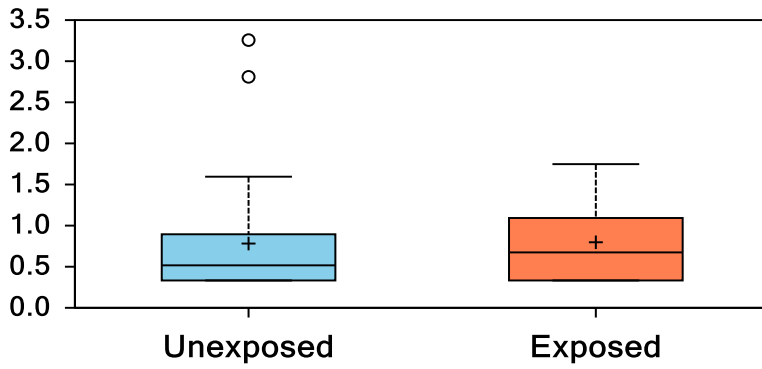

### tauroursodeoxycholate

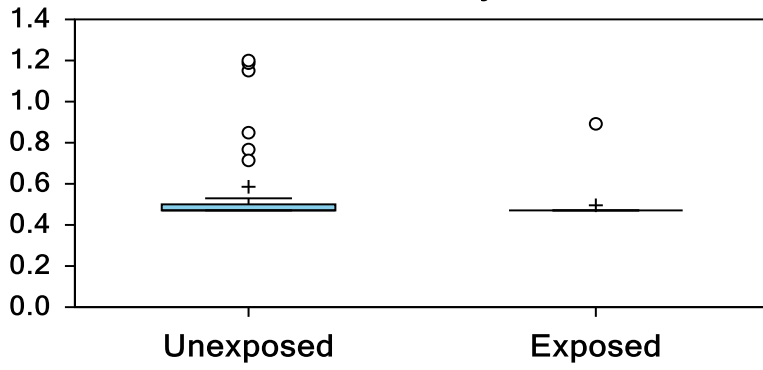

### theobromine

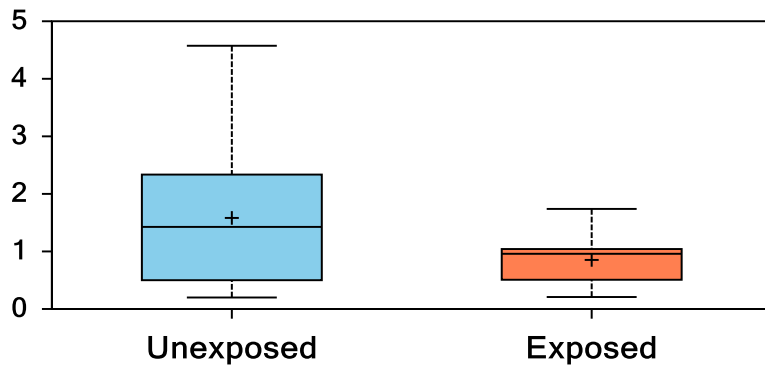

### threonine

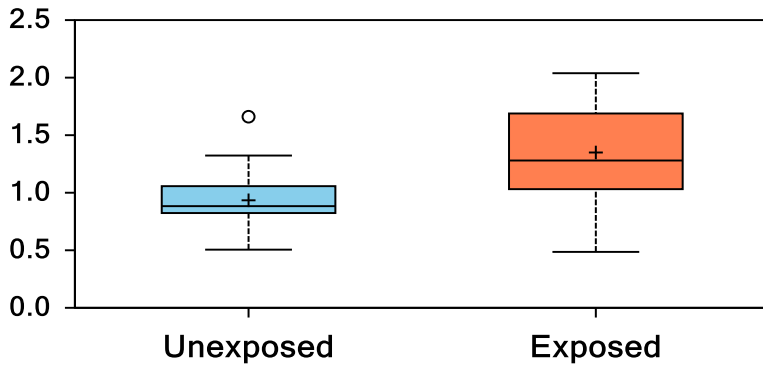

### thymidine

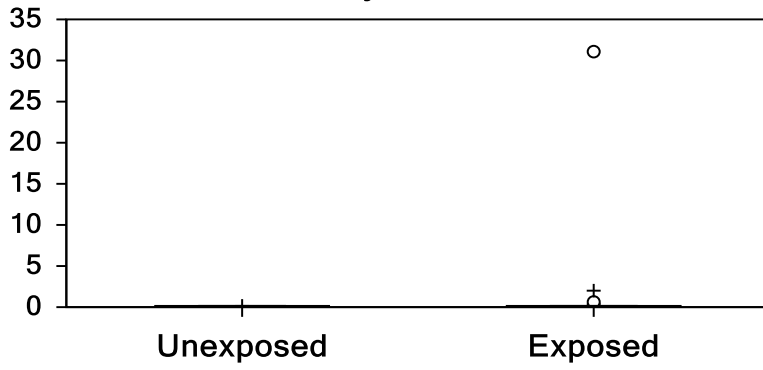

### tigloylglycine

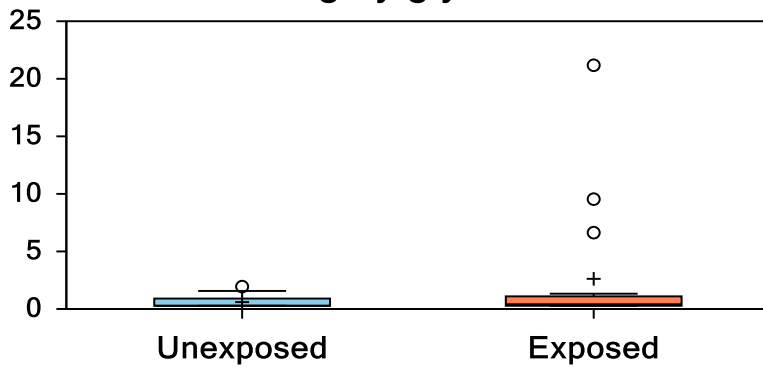

### trans-urocanate

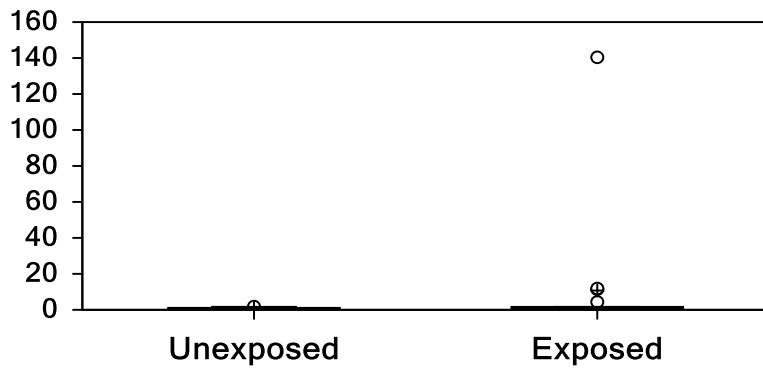

### tryptophan

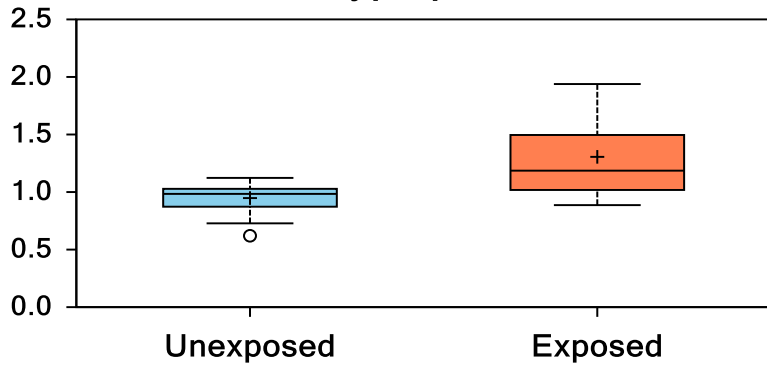

### tryptophylleucine

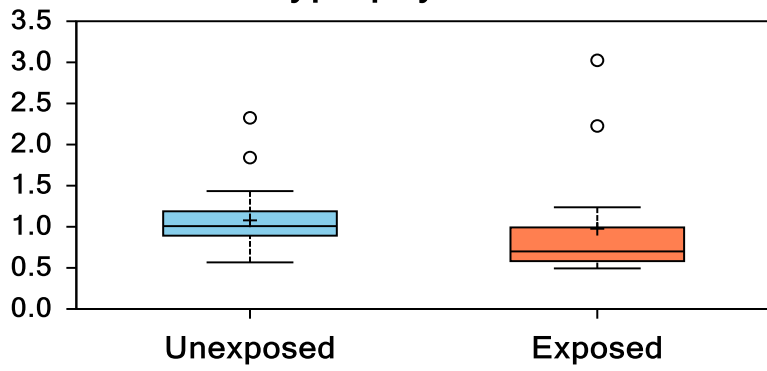

### tyrosylalanine

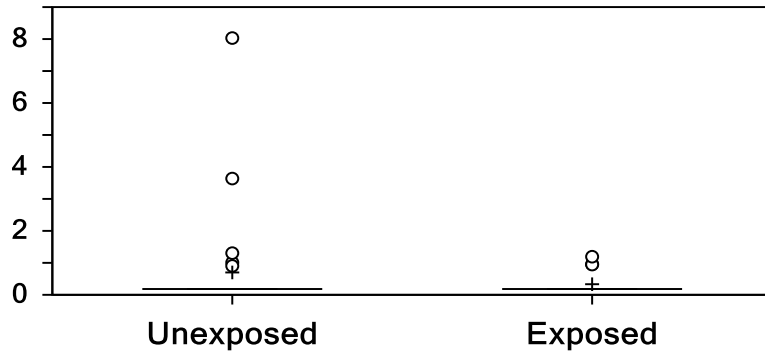

undecanoate (11:0)

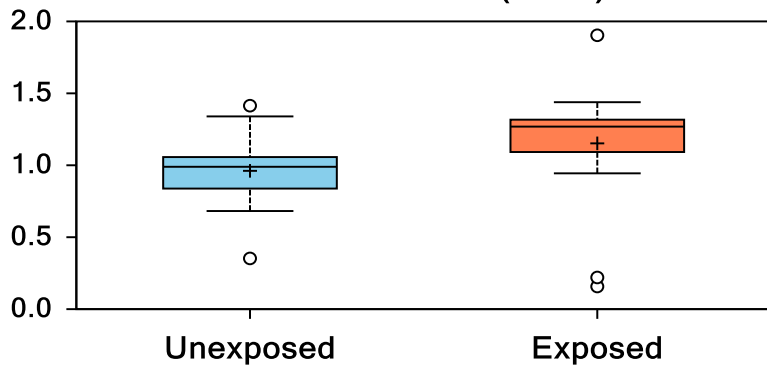

urea

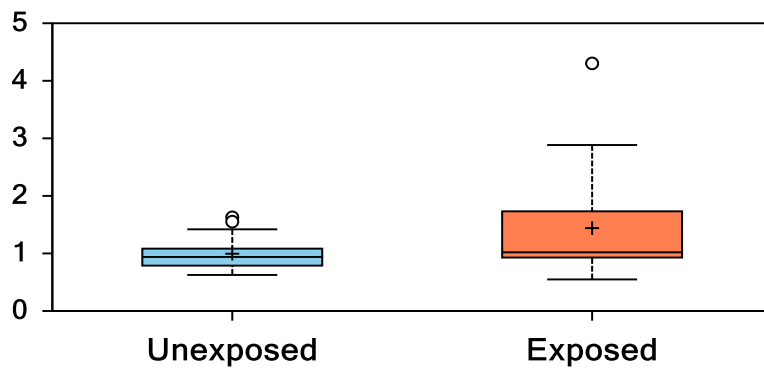

valine

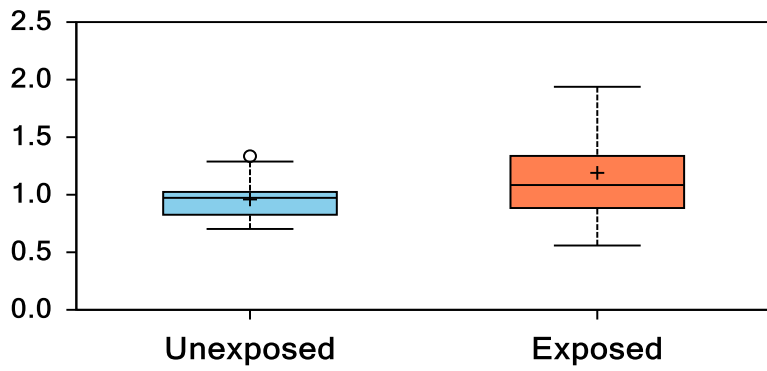

valylglycine

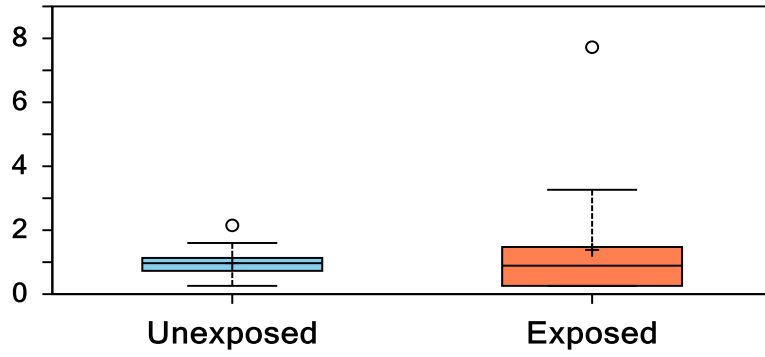

valylmethionine

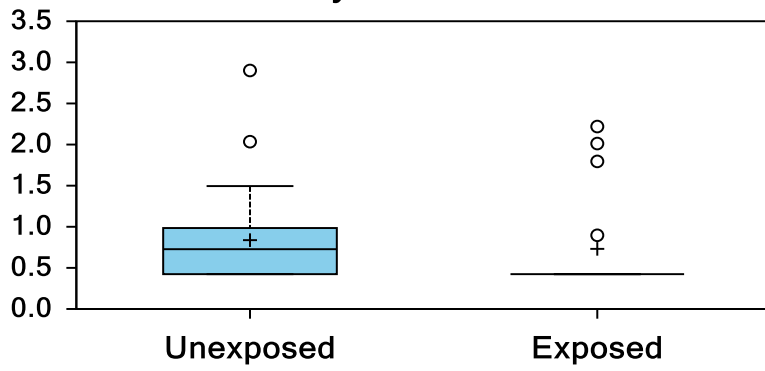

valyltyrosine

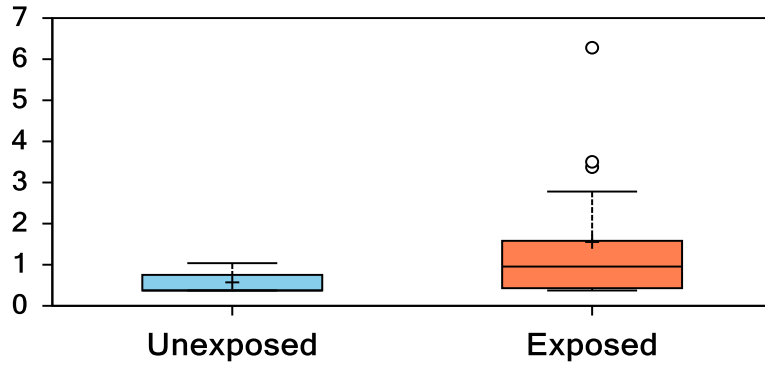



### vanillin

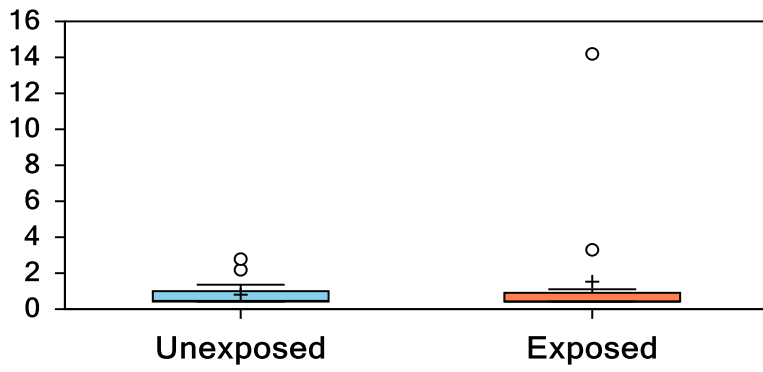

### X - 01911

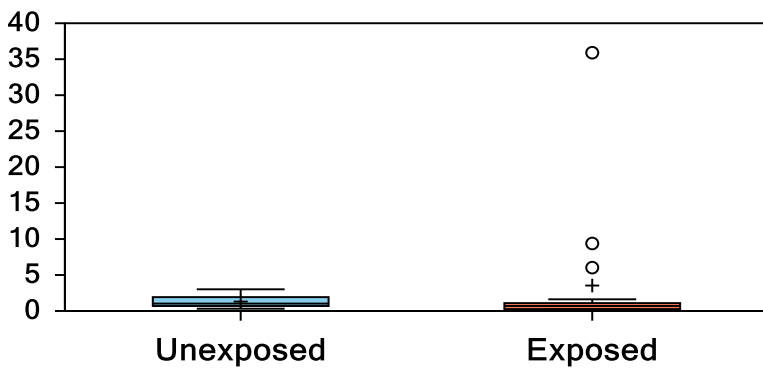

### X - 03056

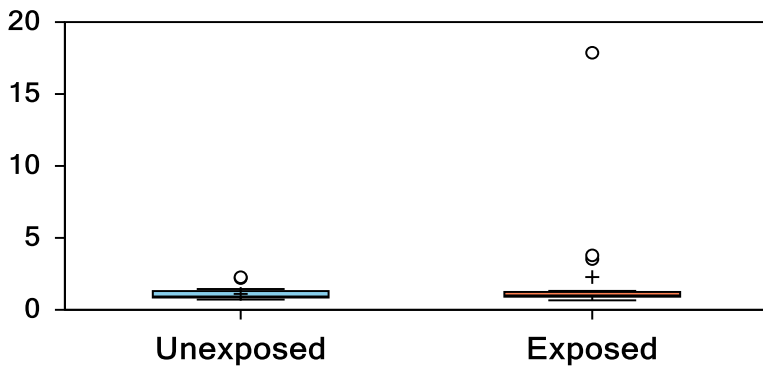

X - 08893

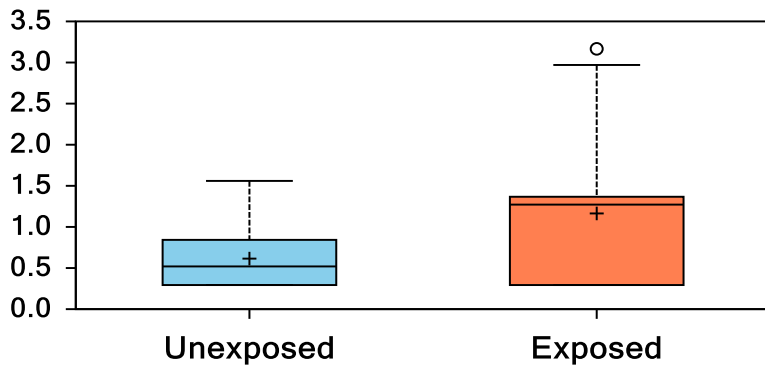

X - 11247

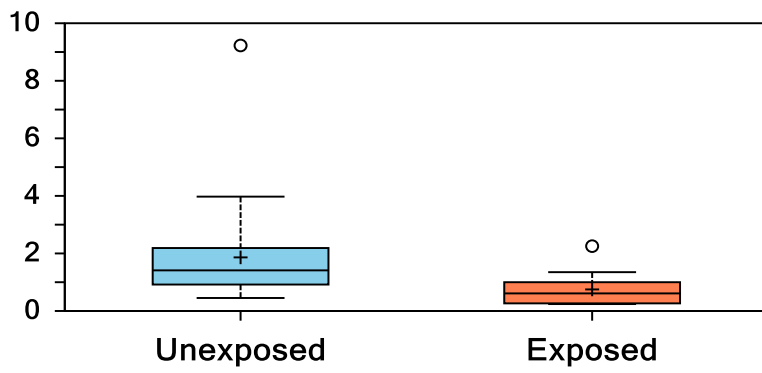

X - 11305

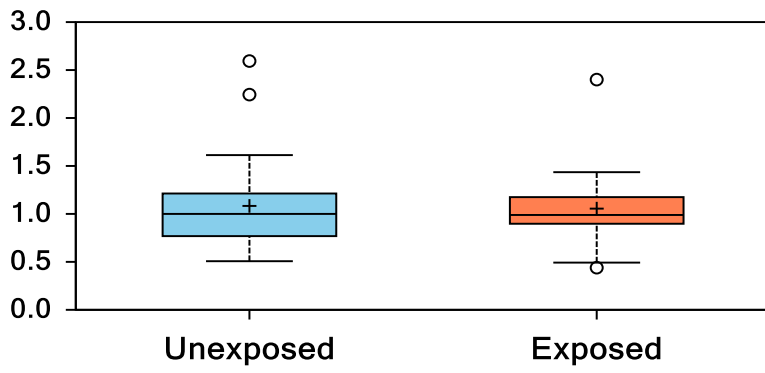

X - 11327

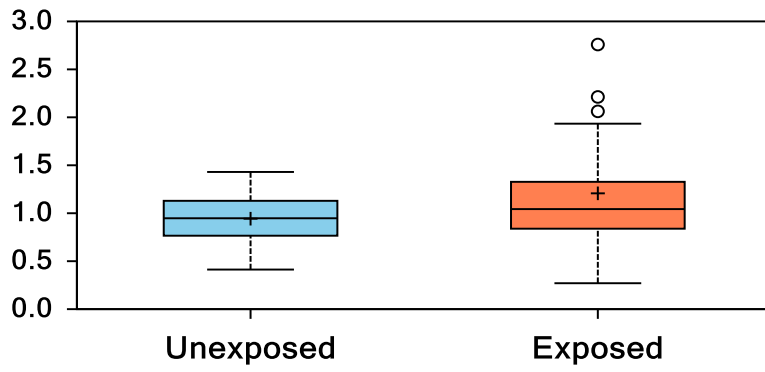

X - 11357

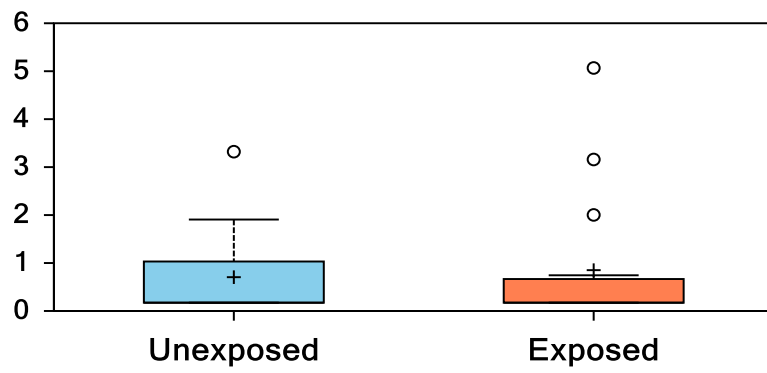

X - 11378

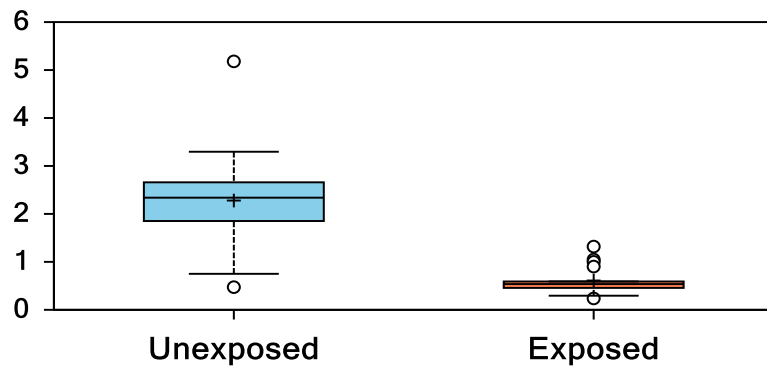

X - 11396

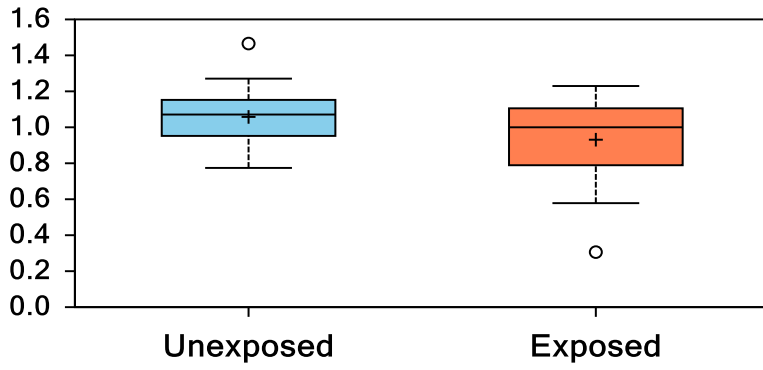

X - 11429

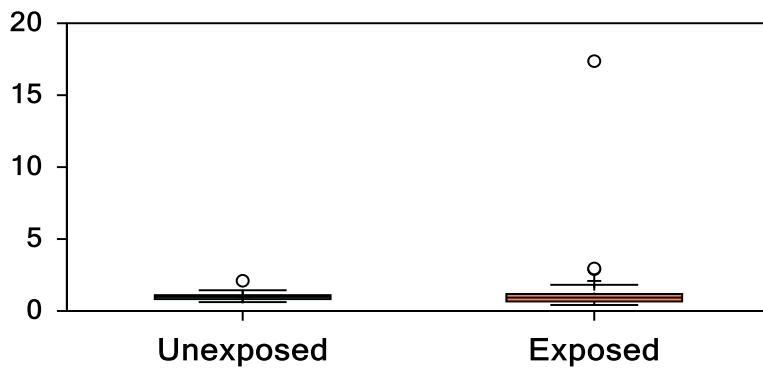

X - 11440

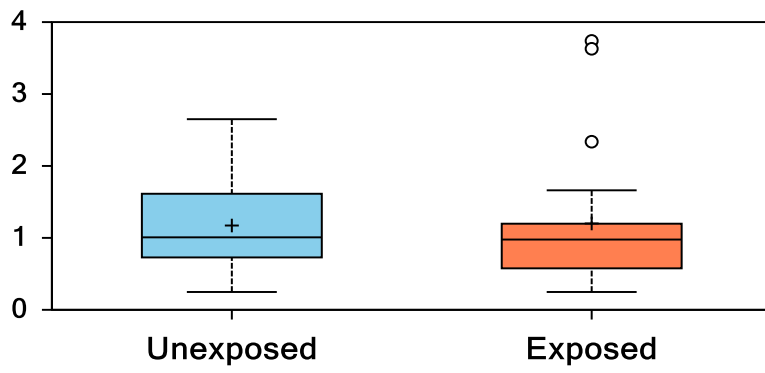

X - 11444

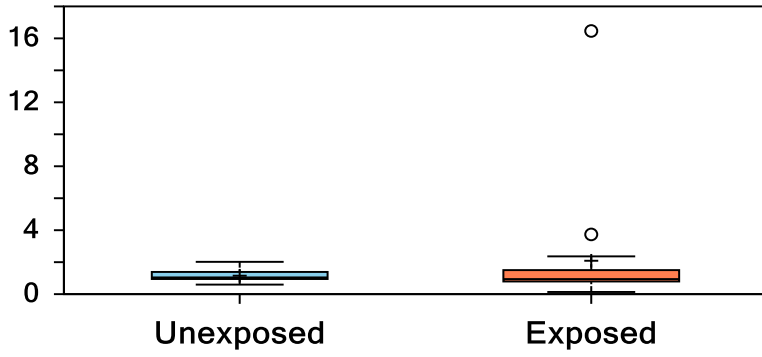

X - 11470

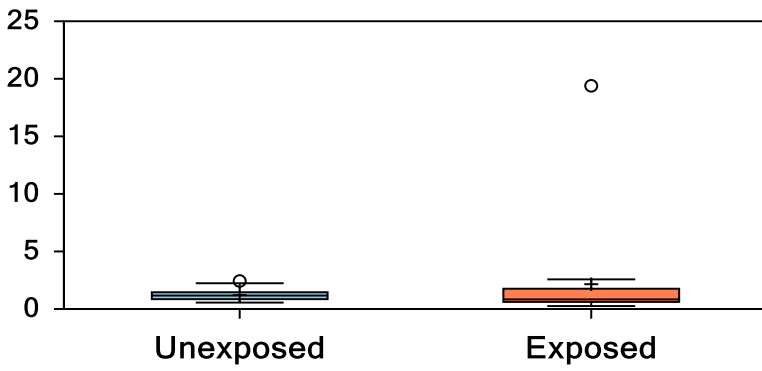

X - 11483

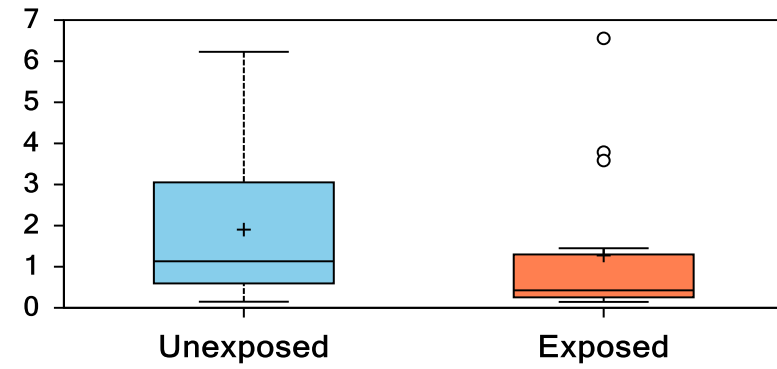

X - 11497

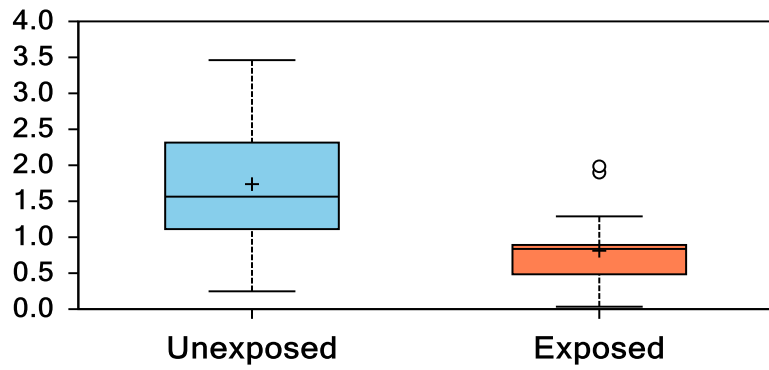

X - 11529

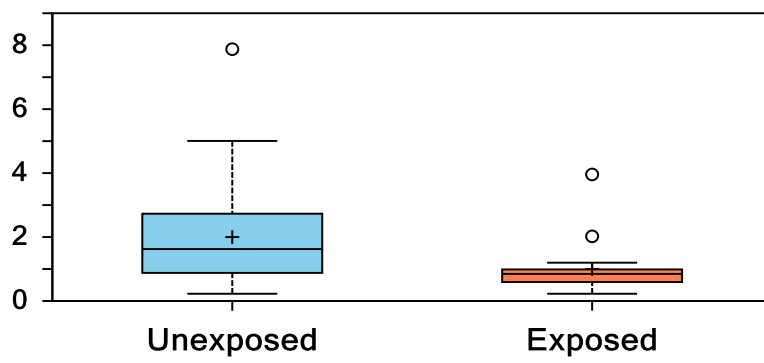

X - 11537

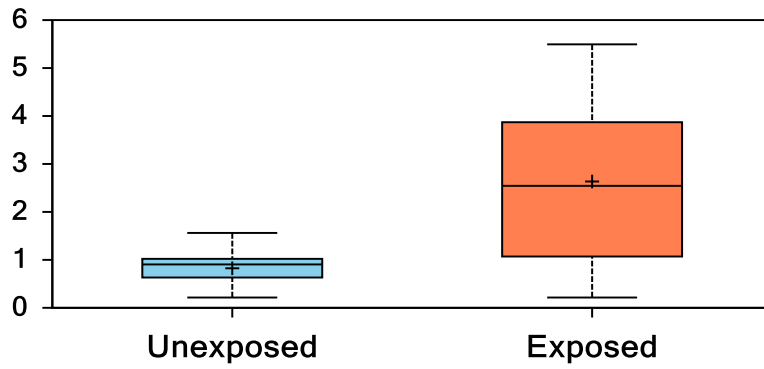

**X - 11541**

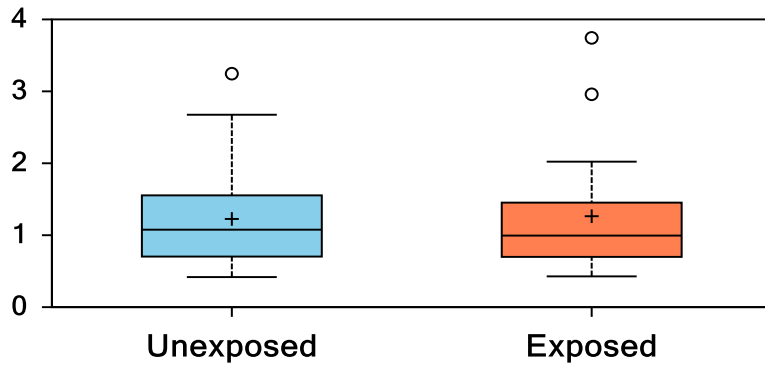

**X - 11550**

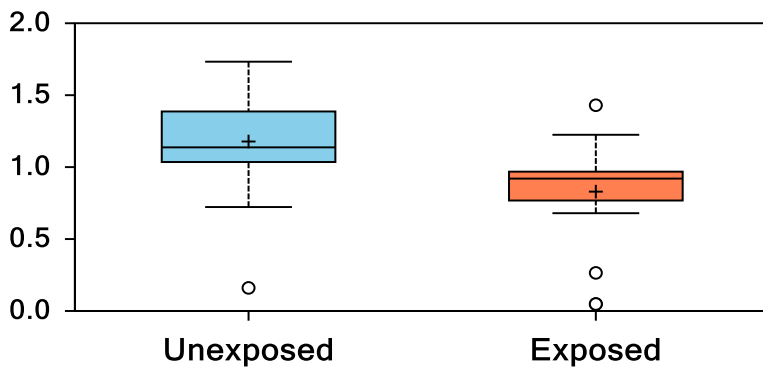

**X - 11641**

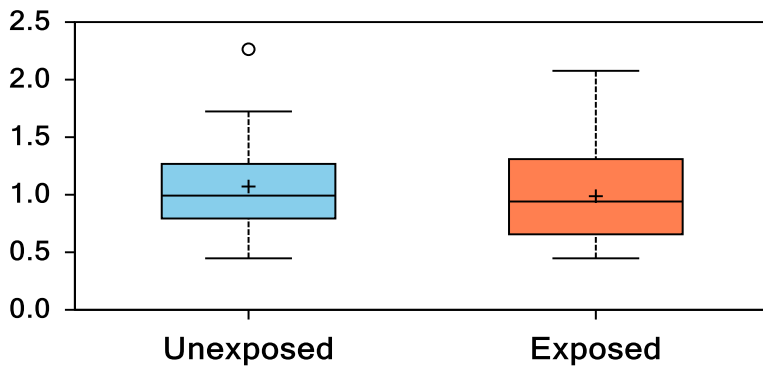

X - 11687

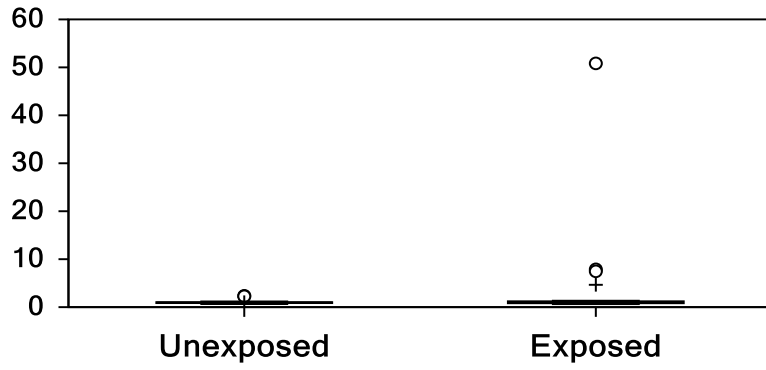

X - 11793

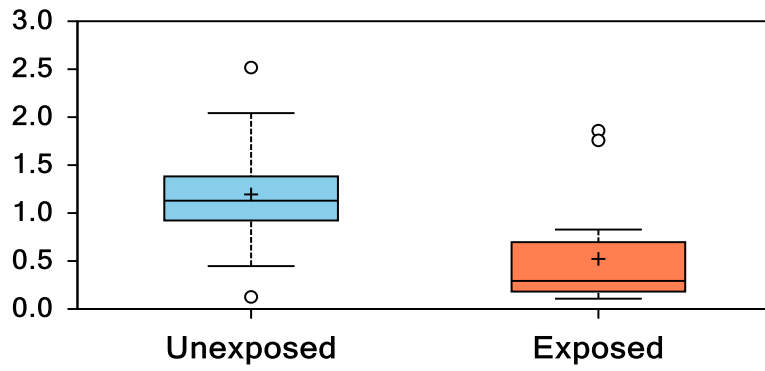

X - 11805

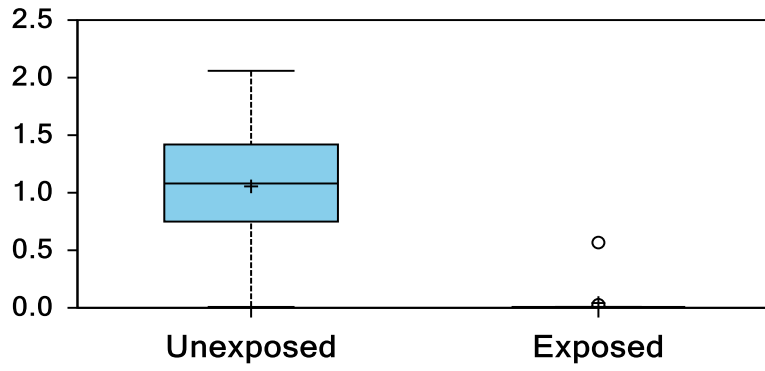



X - 11820

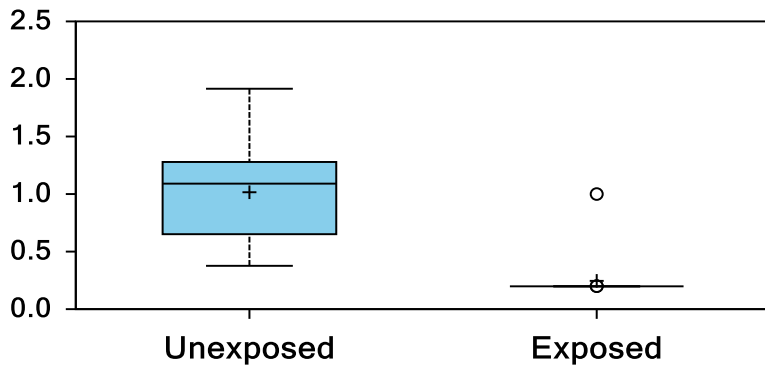

X - 11838

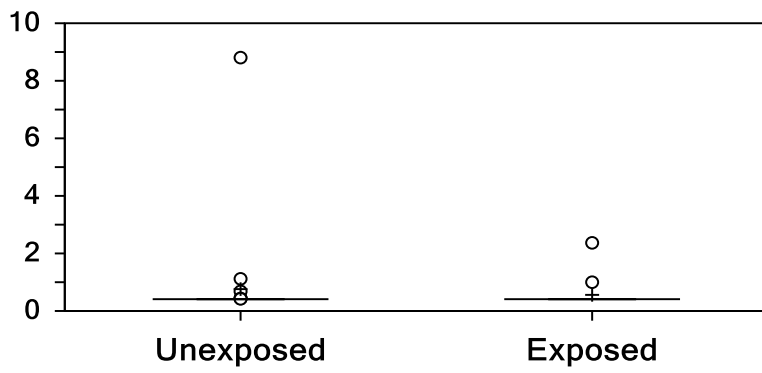

X - 11847

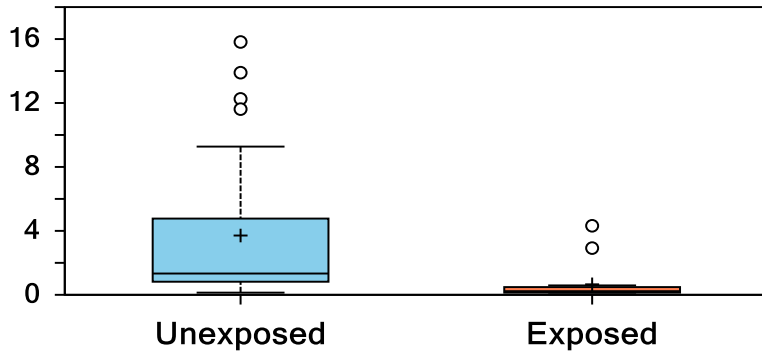

X - 11852

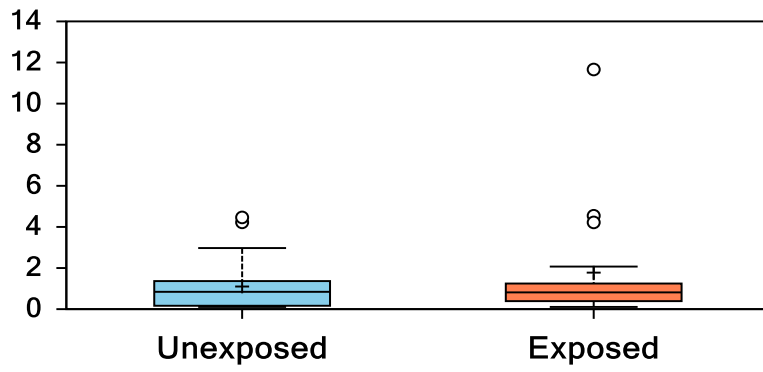

X - 11871

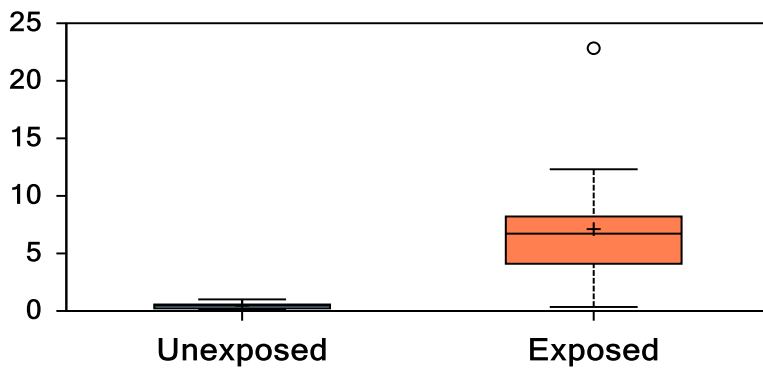

X - 11905

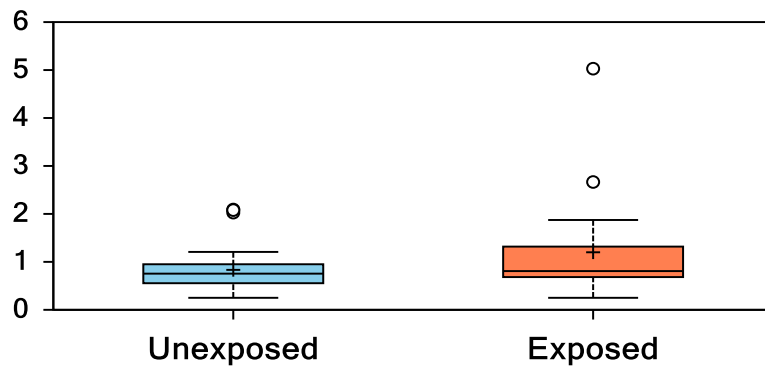

X - 12001

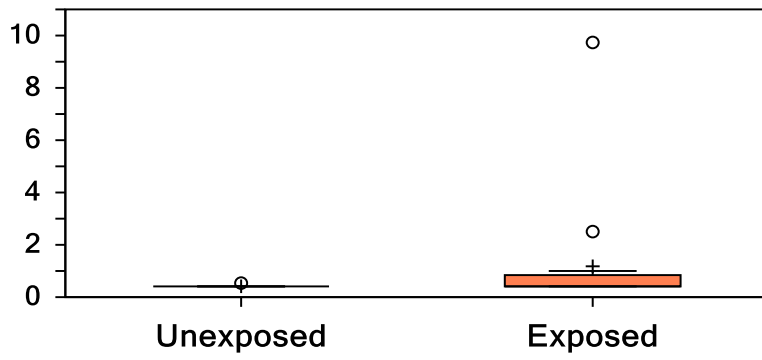

X - 12039

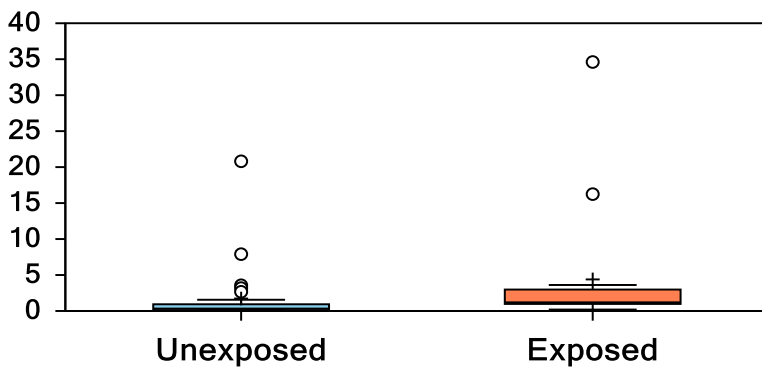

X - 12056

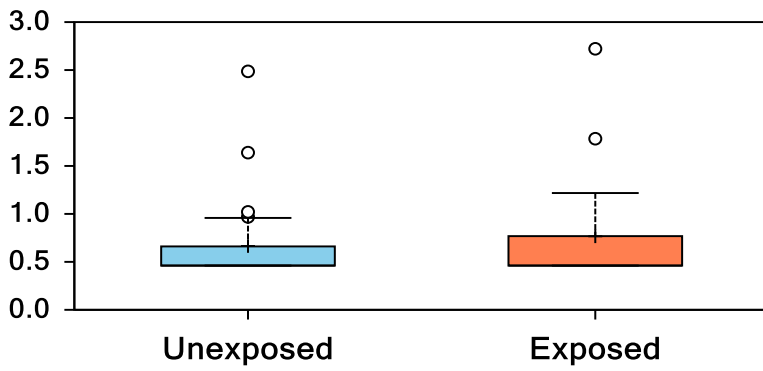

X - 12093

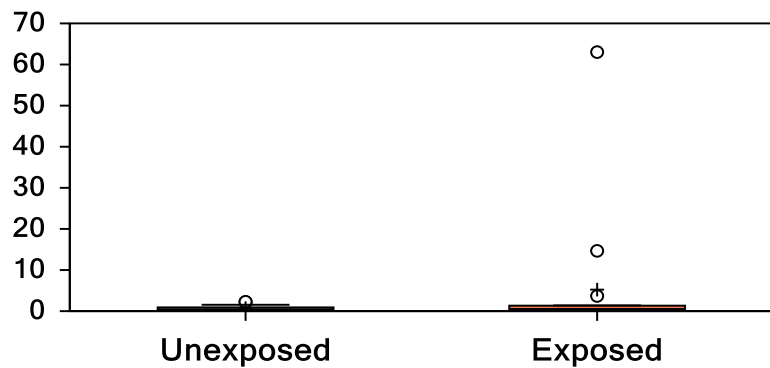

X - 12097

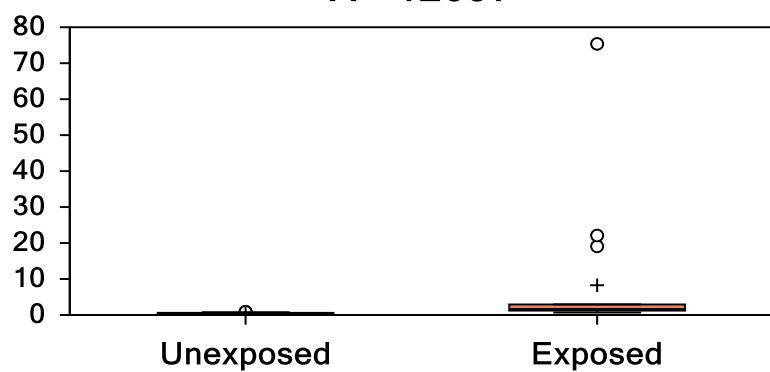

X - 12104

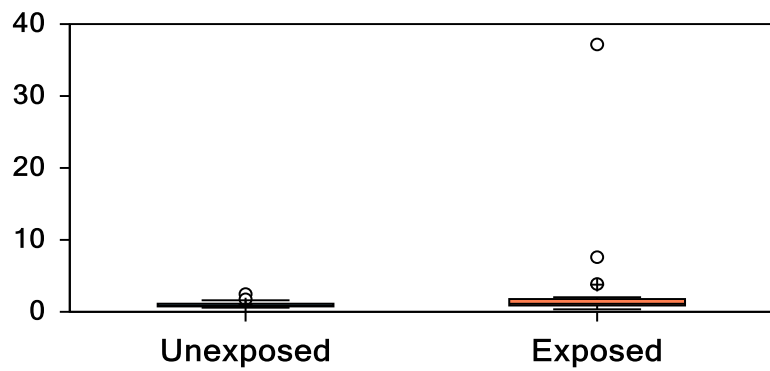

X - 12115

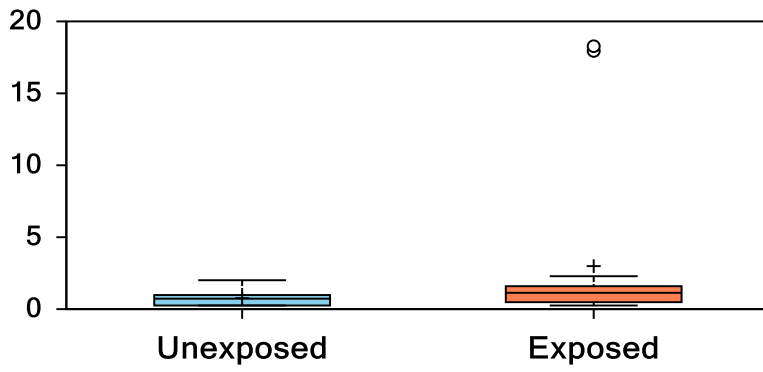

X - 12119

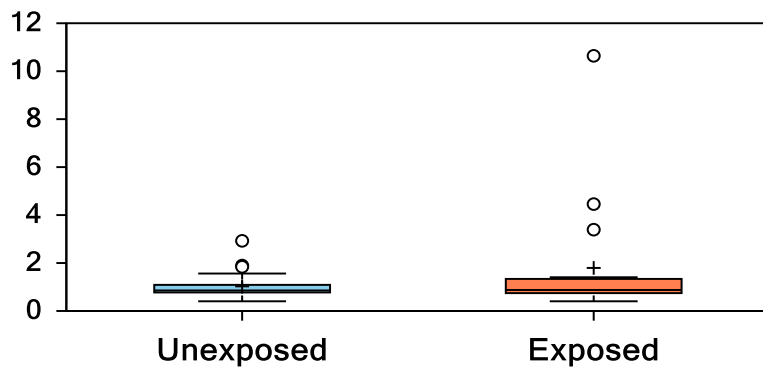

X - 12124

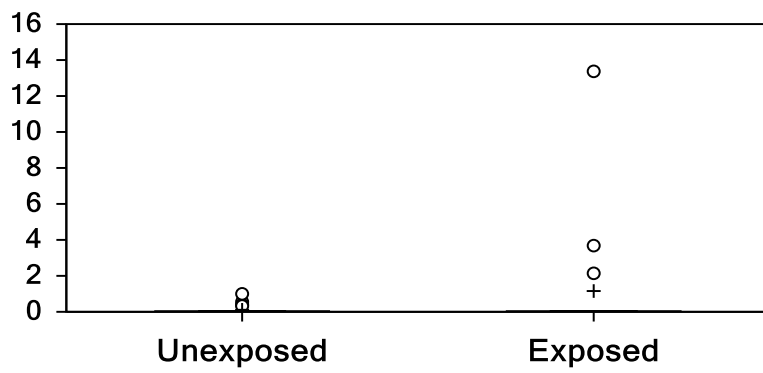

X - 12161

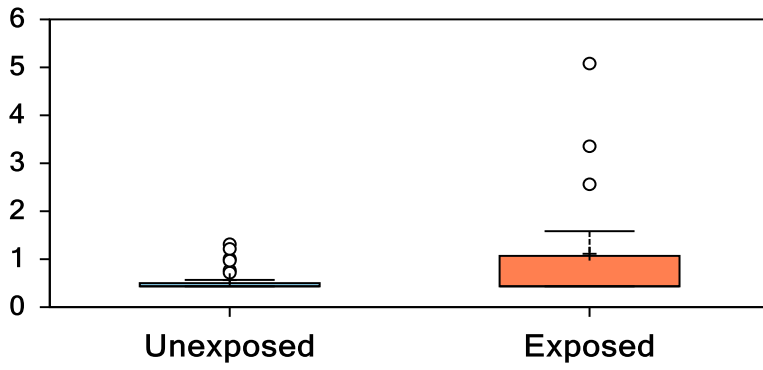

X - 12189

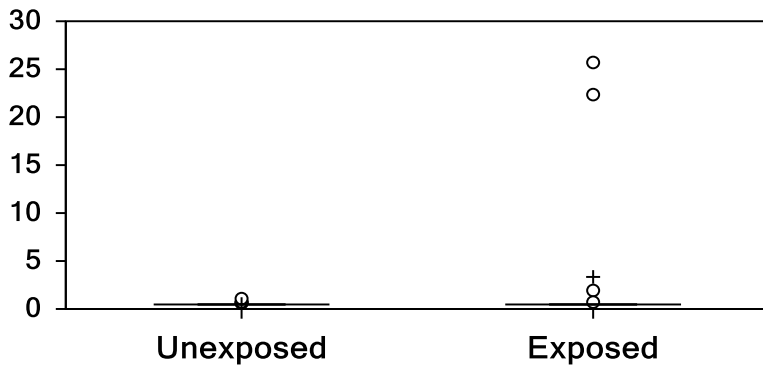

X - 12205

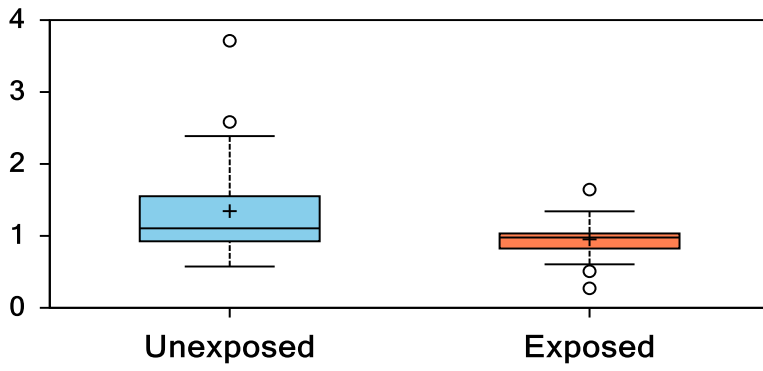

X - 12216

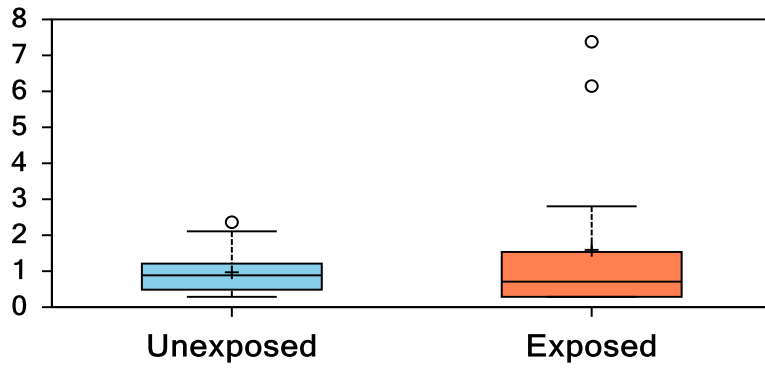

X - 12234

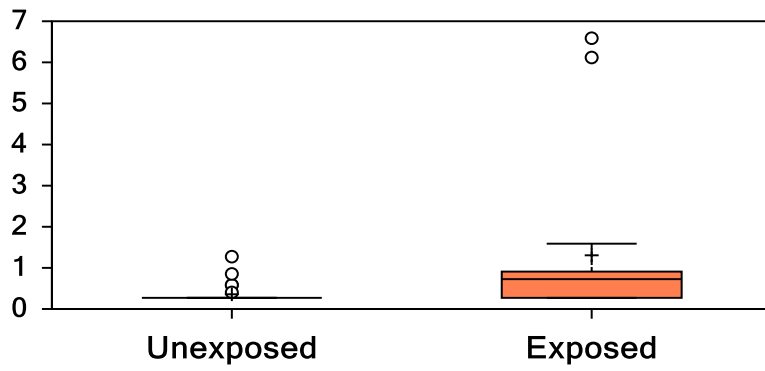

X - 12258

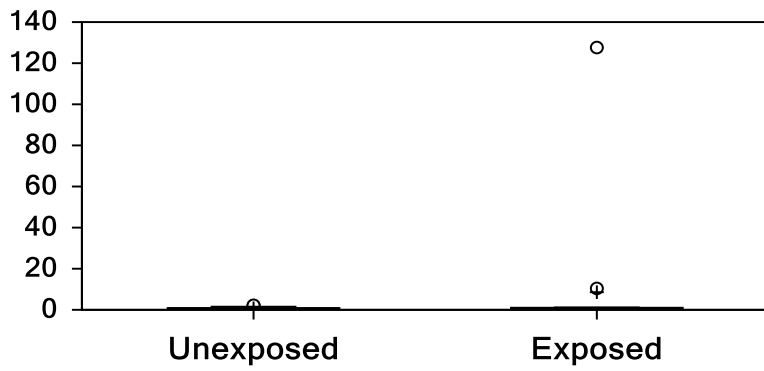

X - 12283

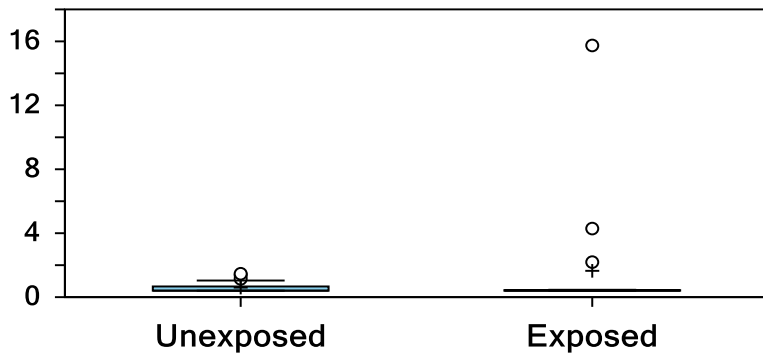

X - 12335

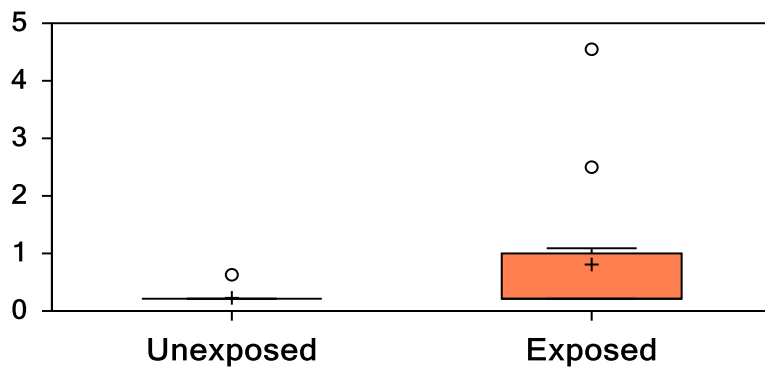

X - 12407

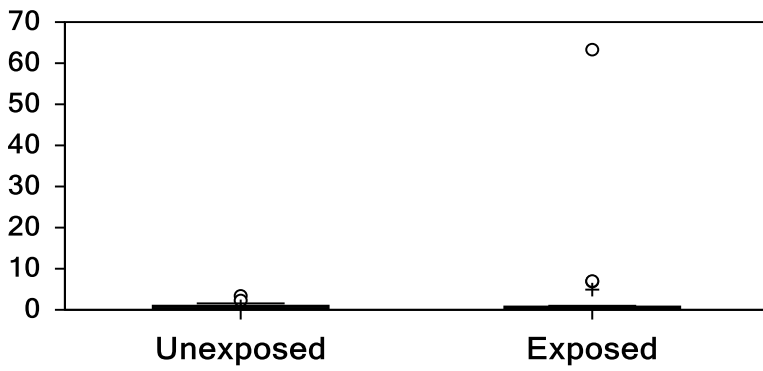



X - 12422

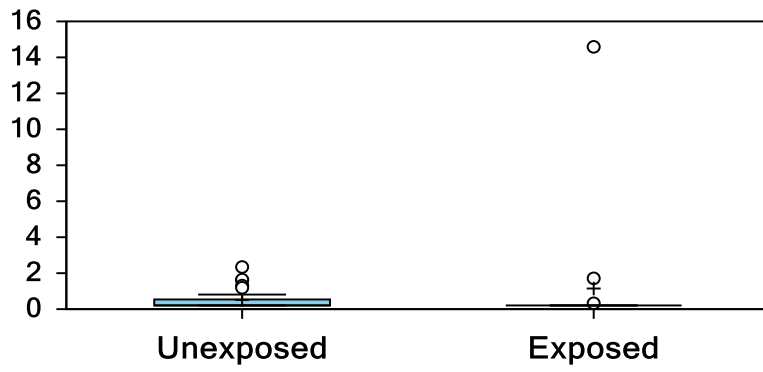

X - 12465

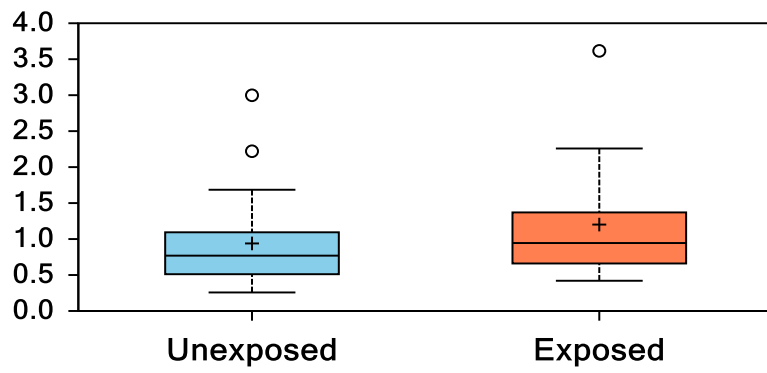

X - 12525

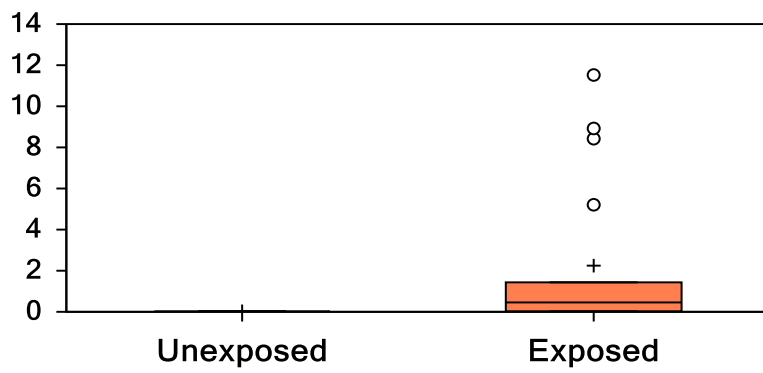

X - 12602

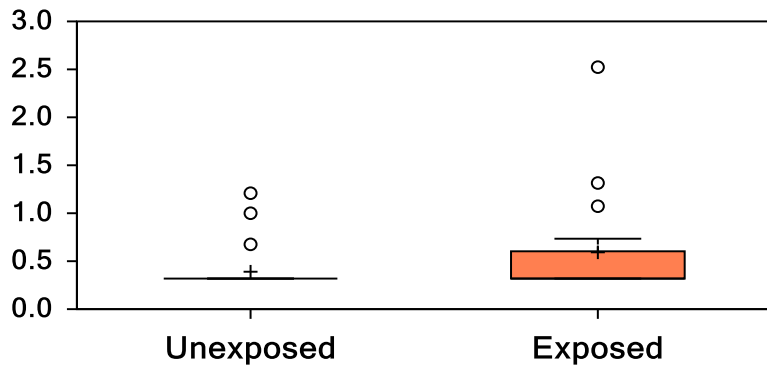

X - 12636

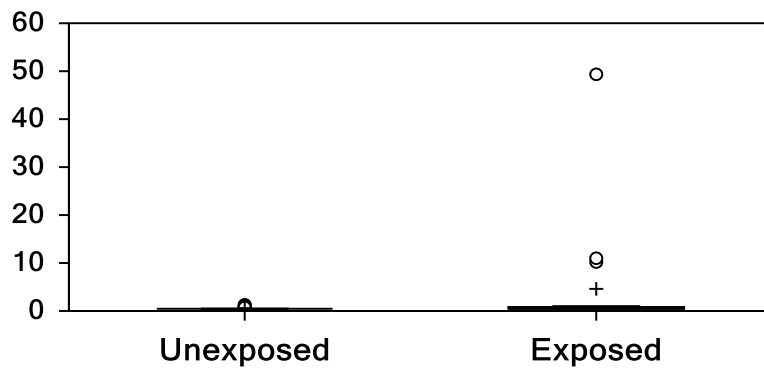

X - 12660

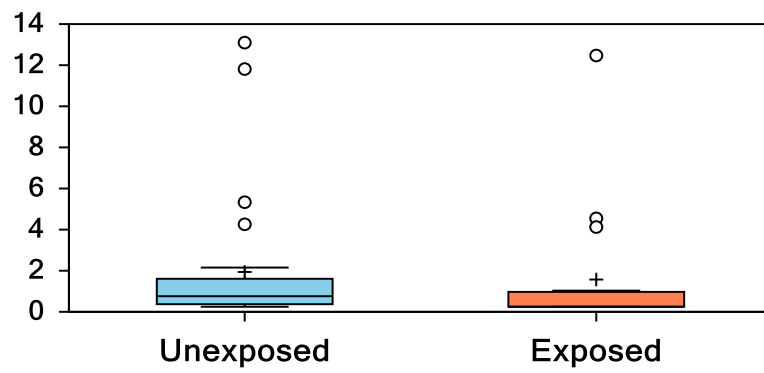

X - 12695

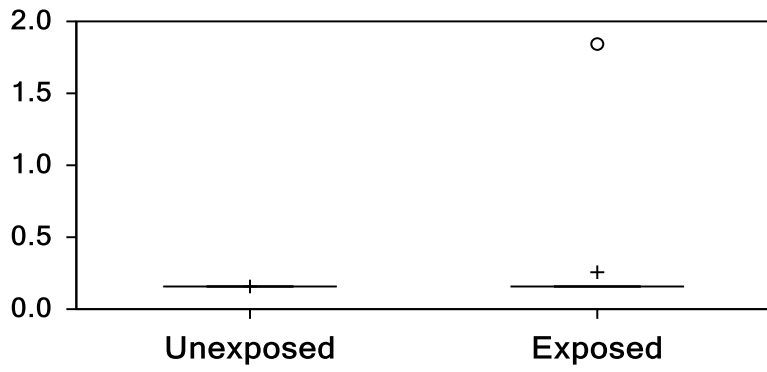

X - 12714

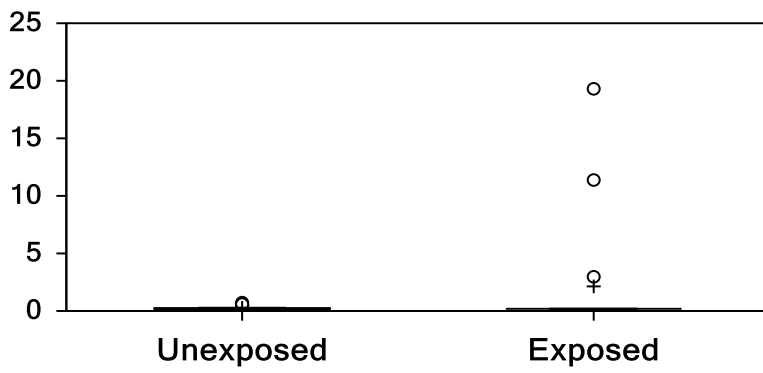

X - 12731

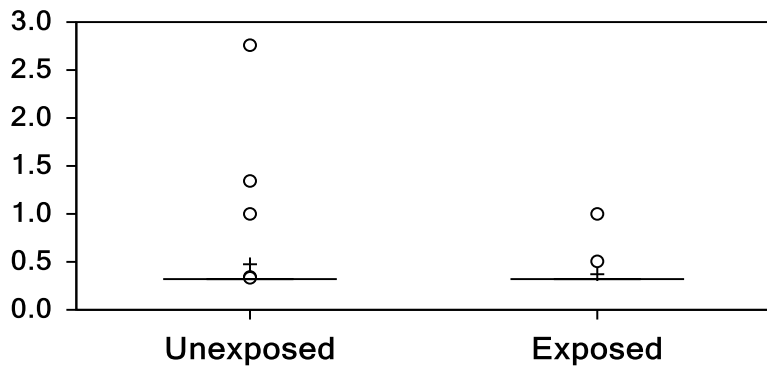

X - 12739

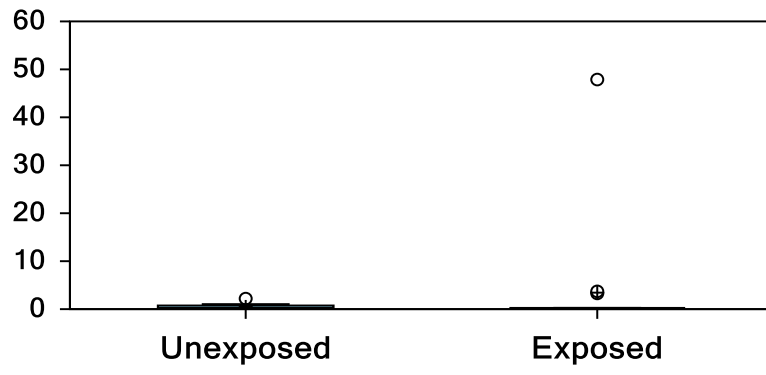

X - 12743

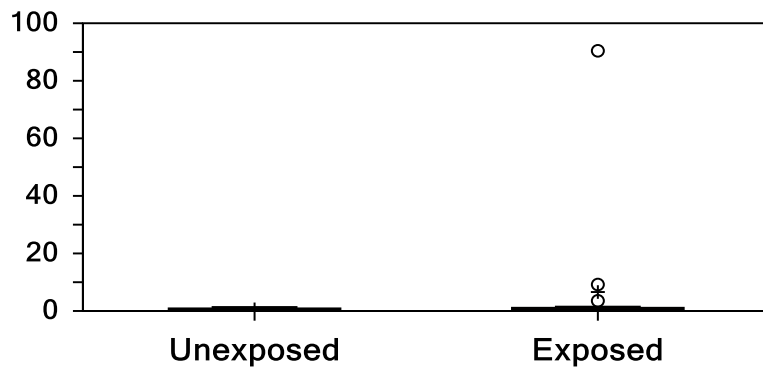

X - 12749

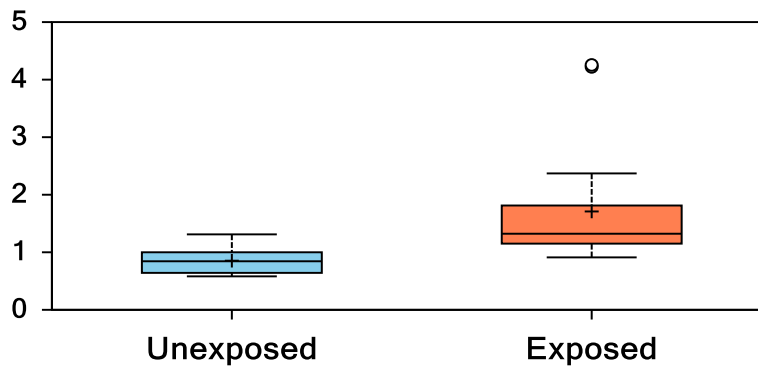

X - 12776

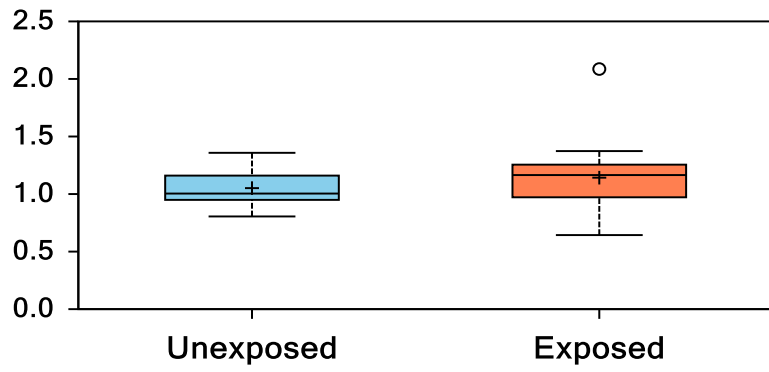

X - 12805

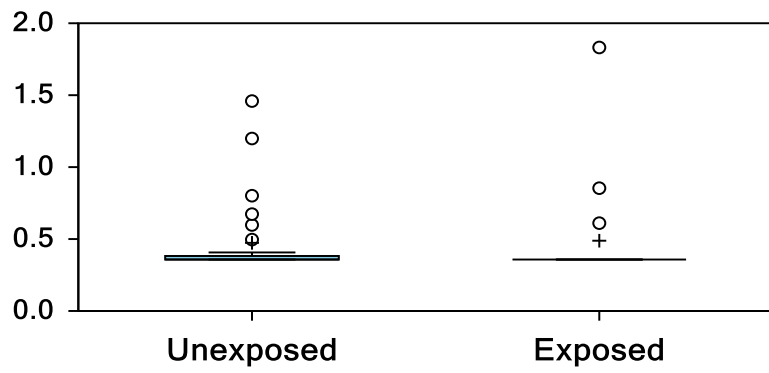

X - 12816

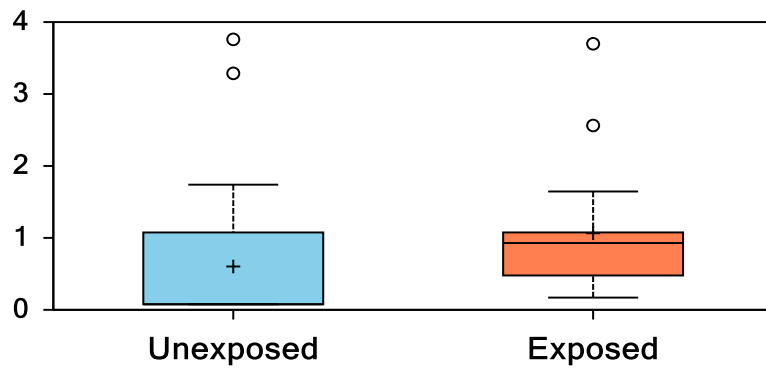

X - 12824

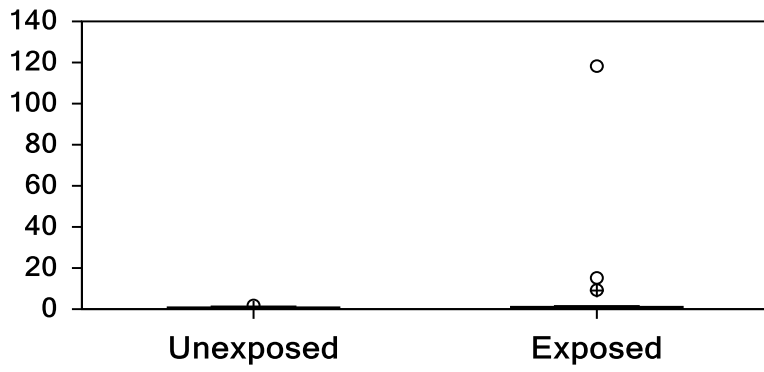

X - 12831

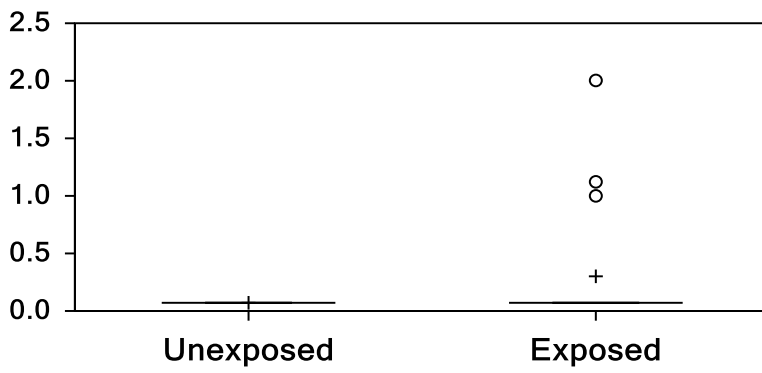

X - 12844

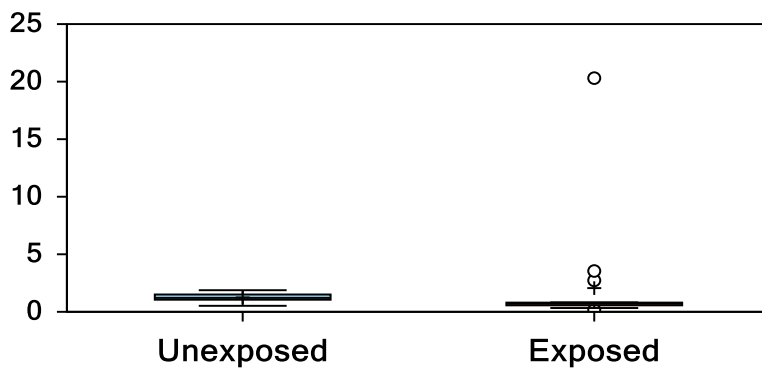

X - 12849

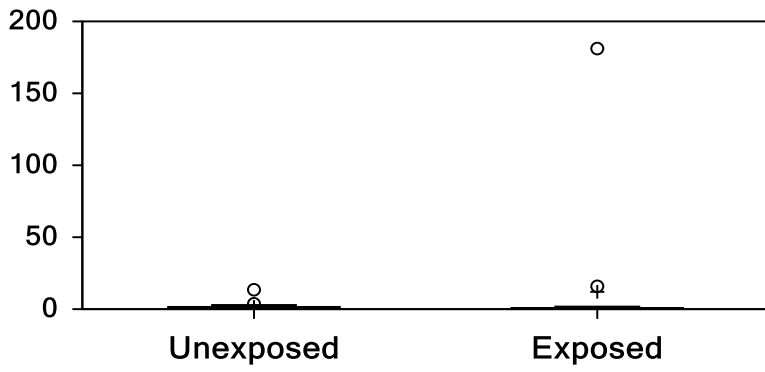

X - 12860

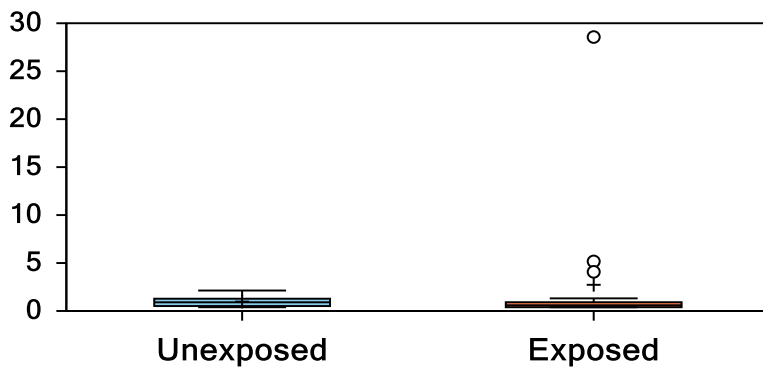

X - 12889

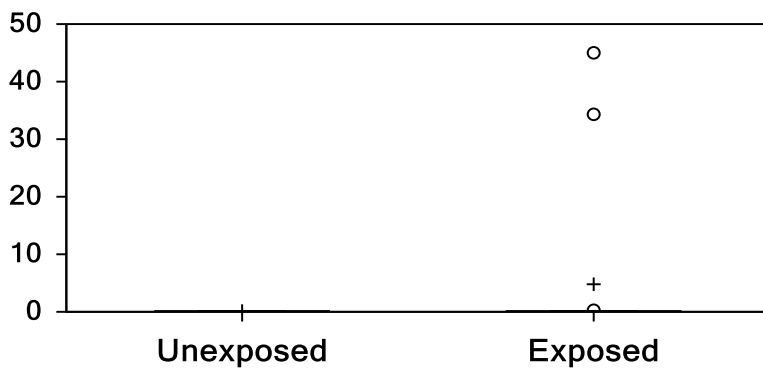

X - 13069

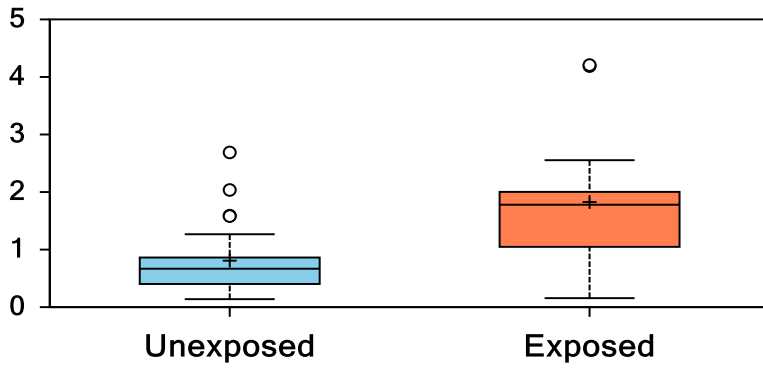

X - 13255

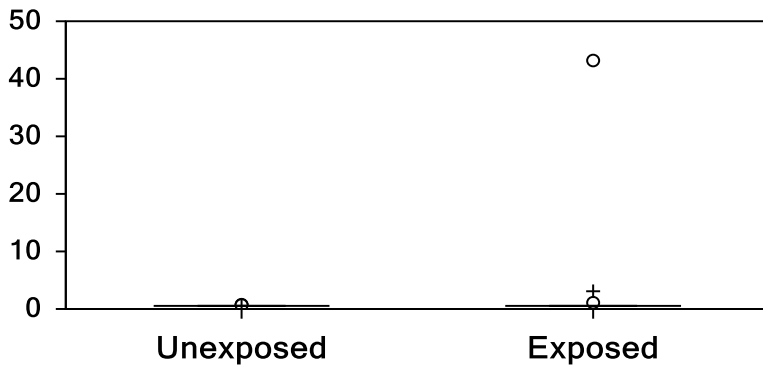

X - 13429

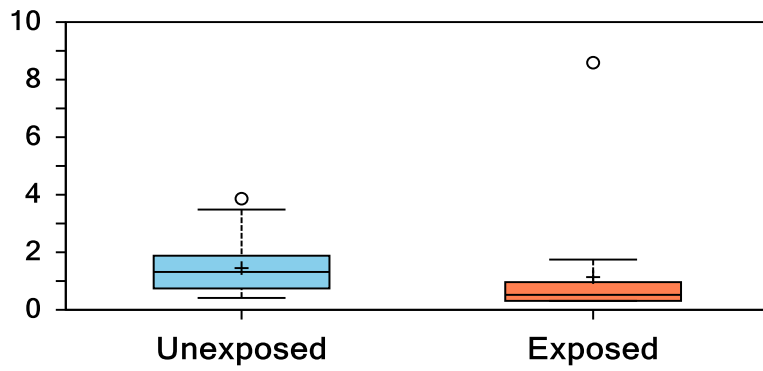



X - 13462

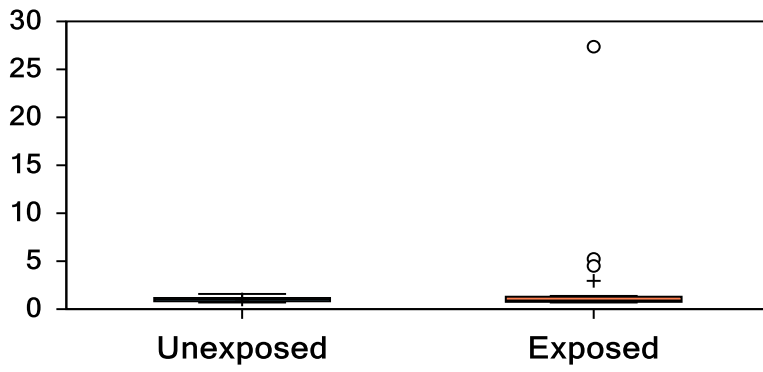

X - 13543

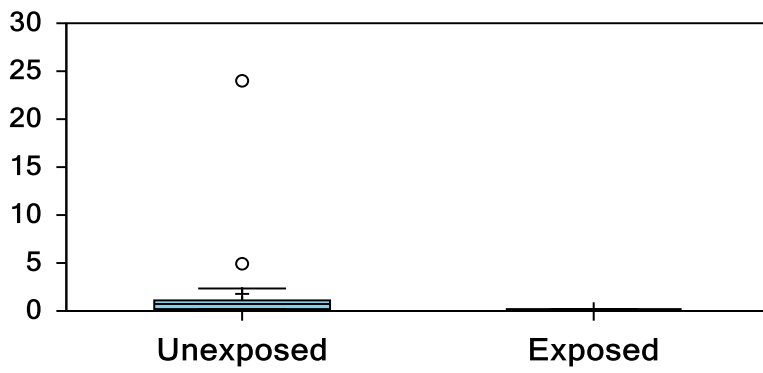

X - 13671

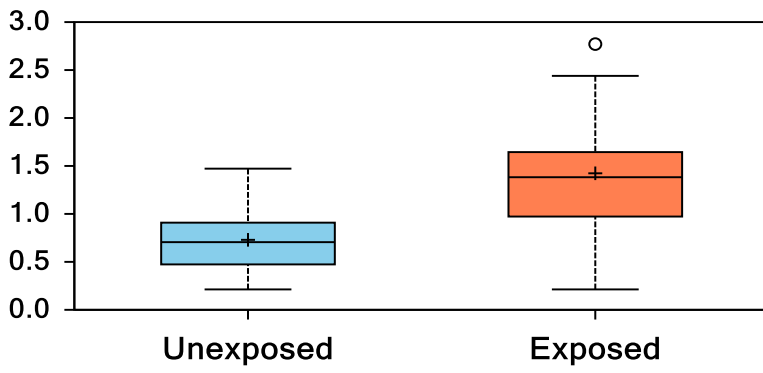

X - 13699

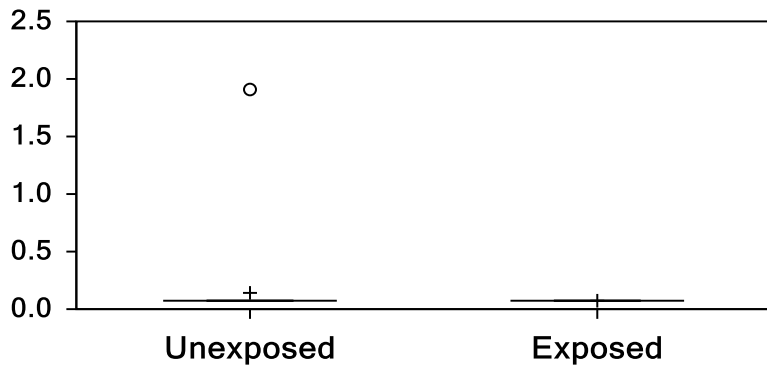

X - 13709

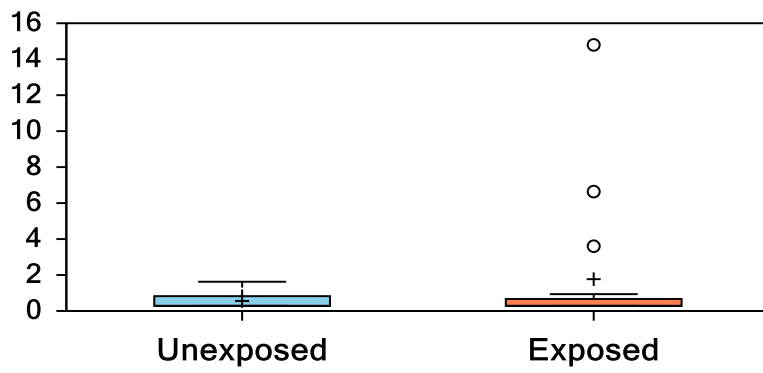

X - 13730

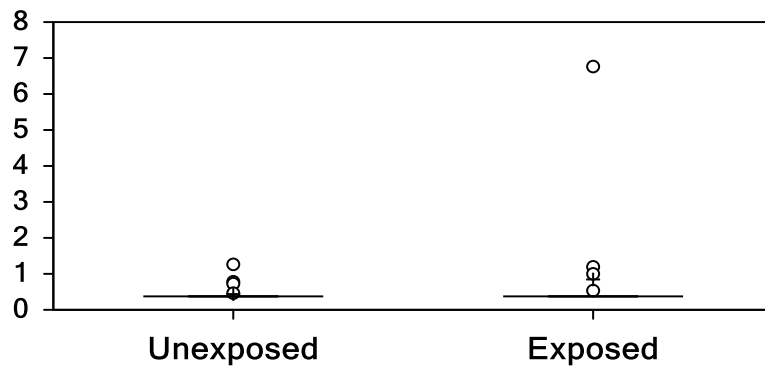

X - 13741

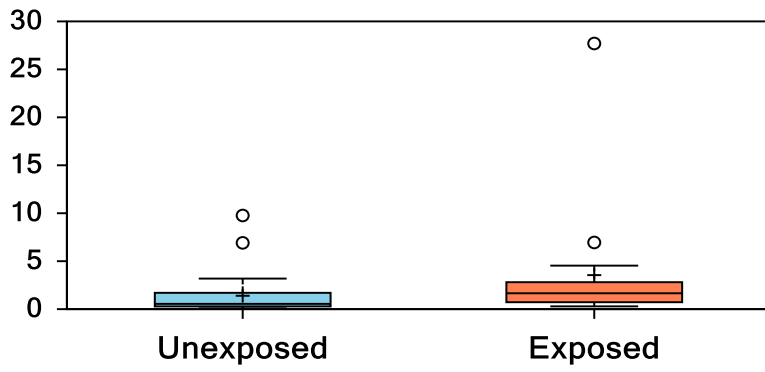

X - 13844

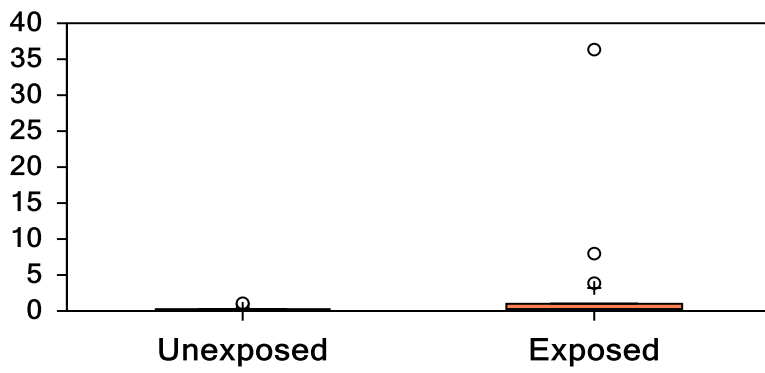

X - 13864

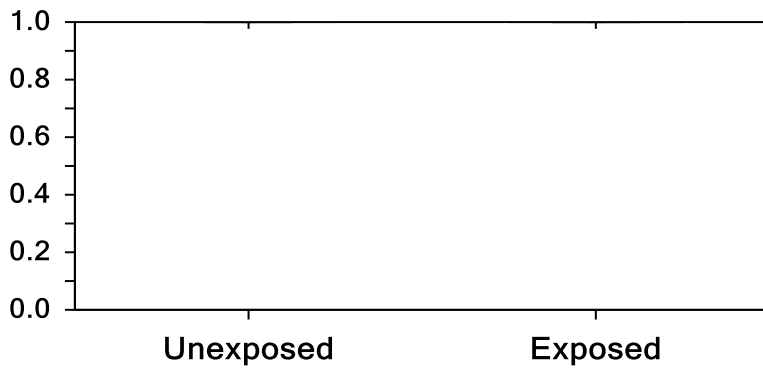

X - 13928

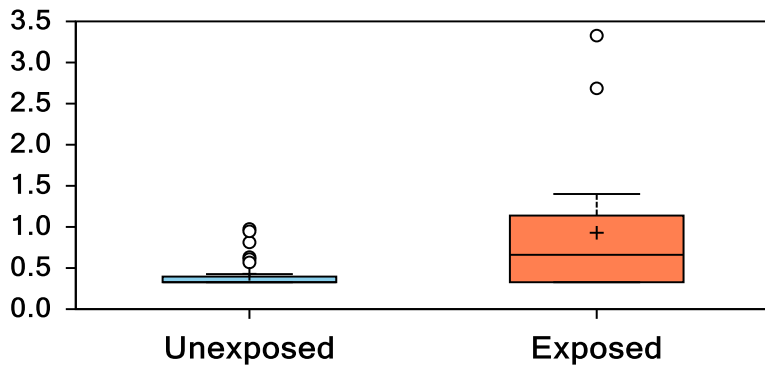

X - 14062

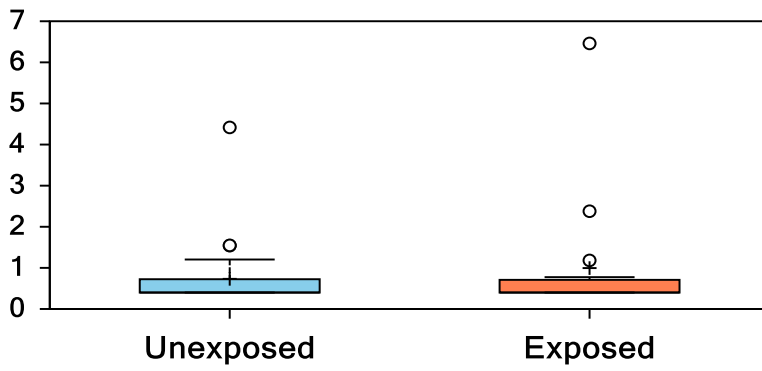

X - 14087

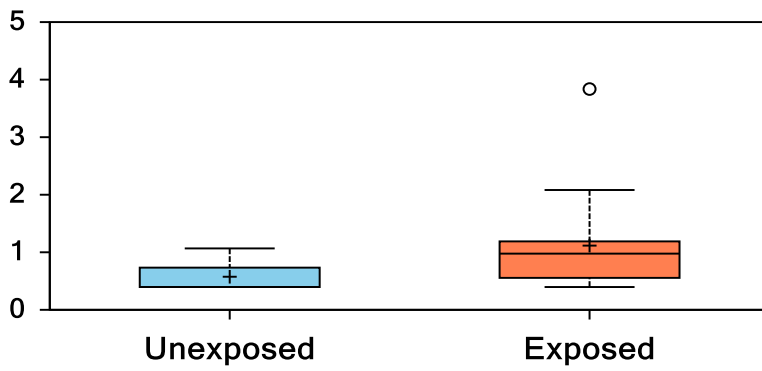

X - 14096

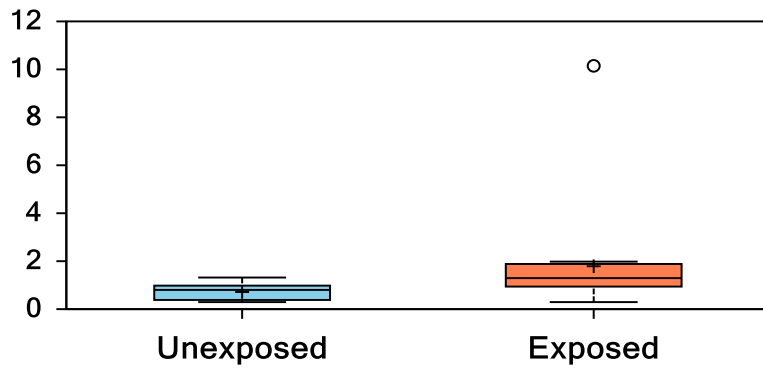

X - 14101

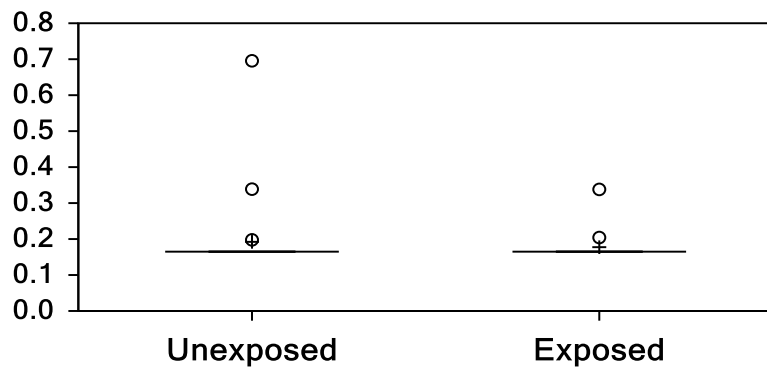

X - 14141

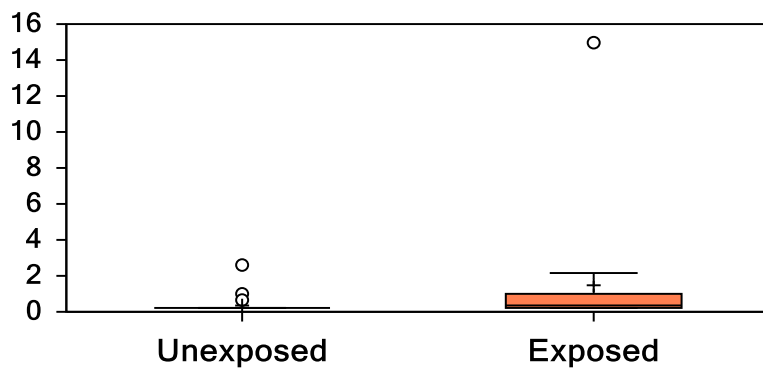

X - 14150

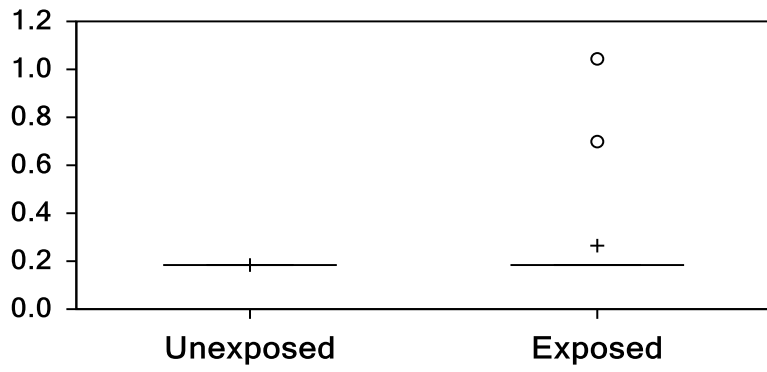

X - 14162

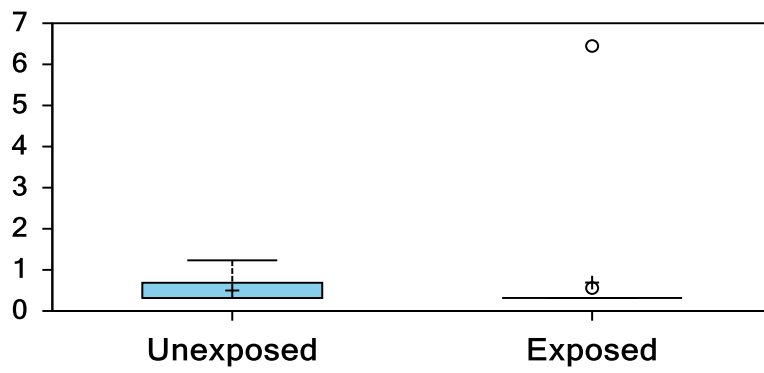

X - 14195

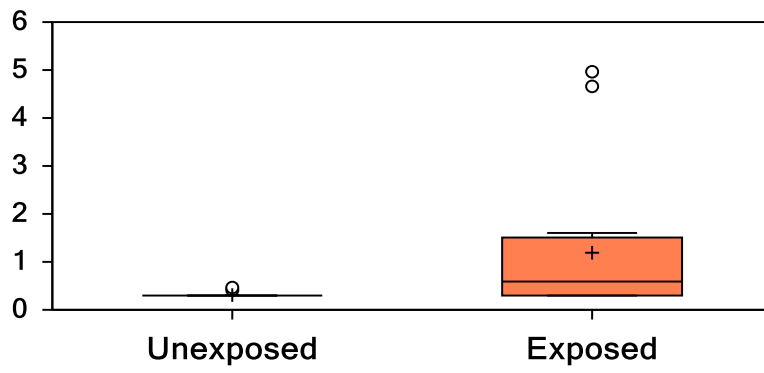

X - 14213

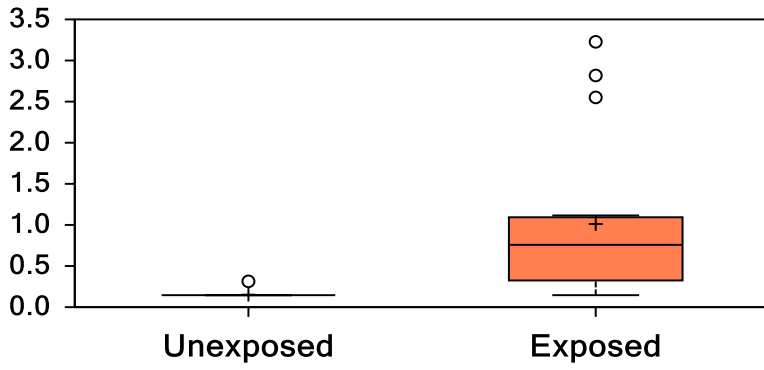

X - 14255

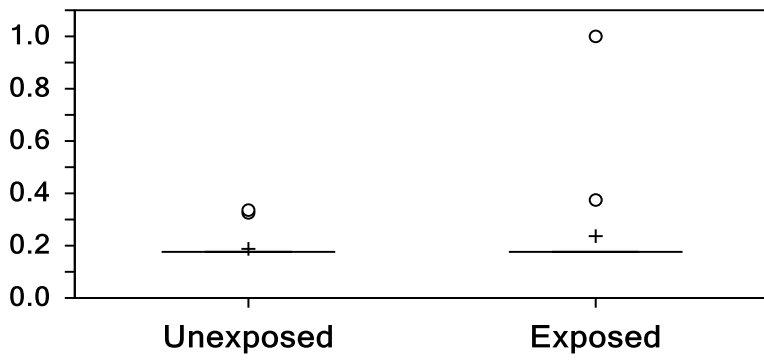

X - 14277

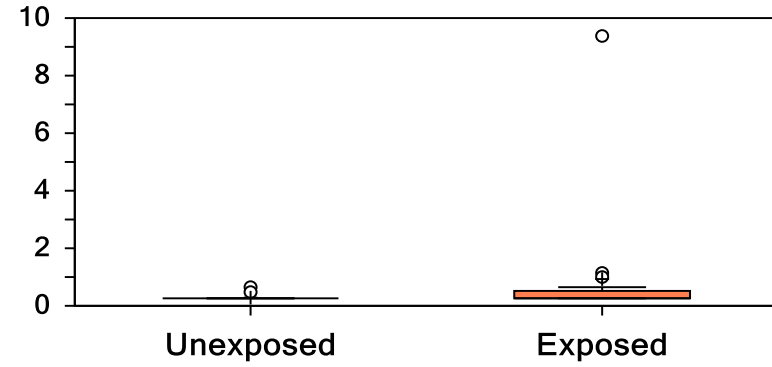

X - 14338

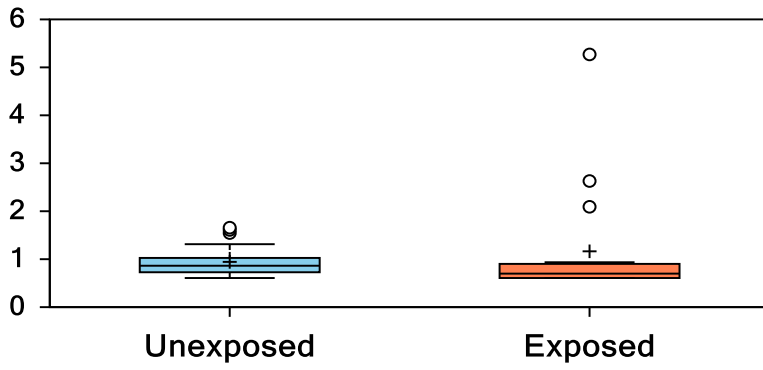

X - 14364

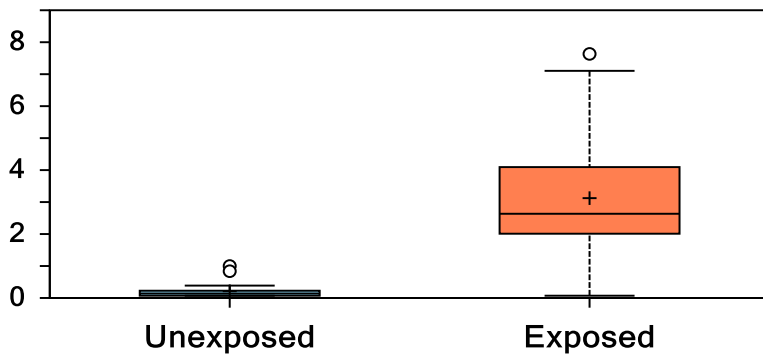

X - 14427

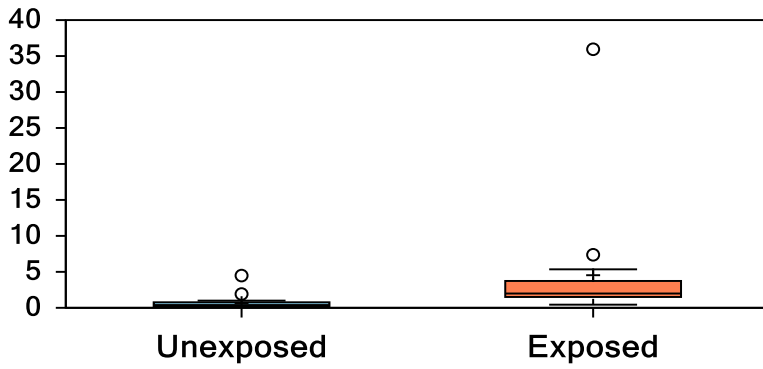



X - 14465

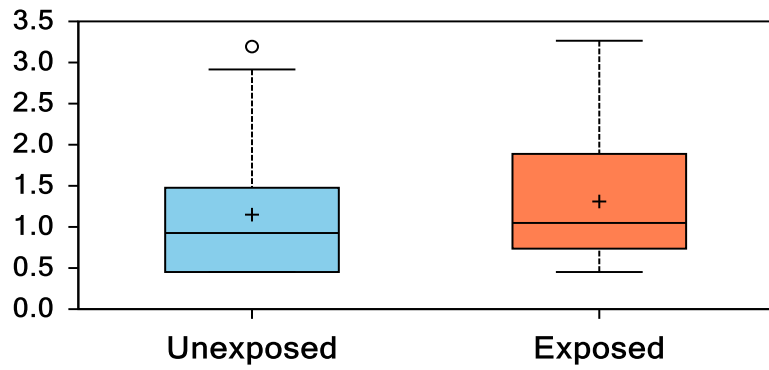

X - 14512

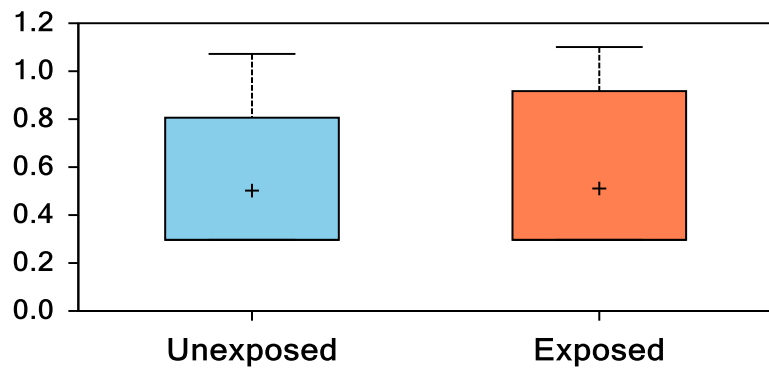

X - 14603

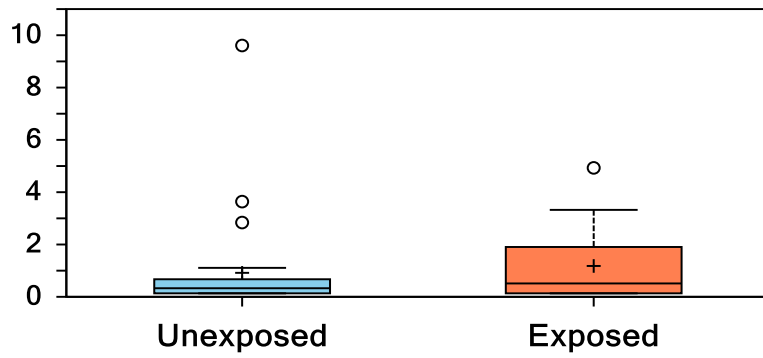

X - 14658

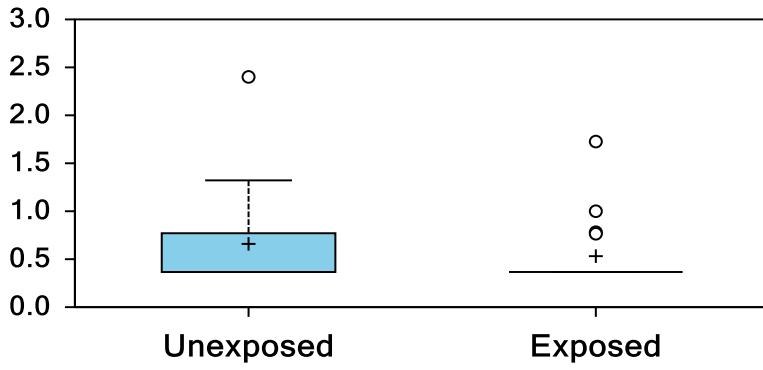

X - 14808

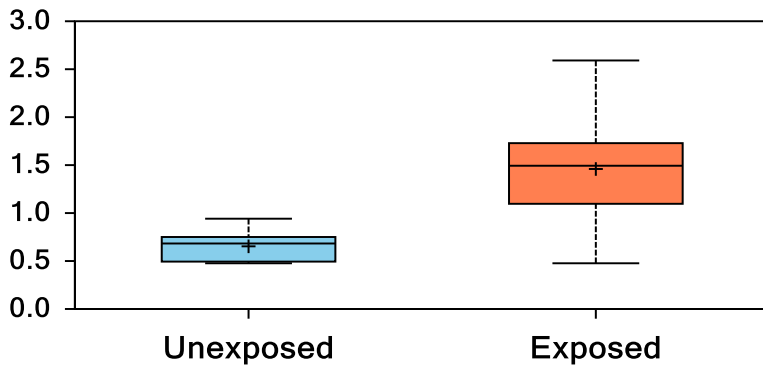

X - 14939

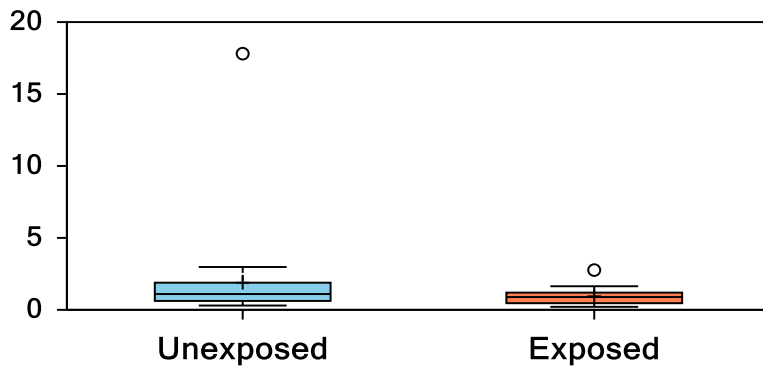

X - 15169

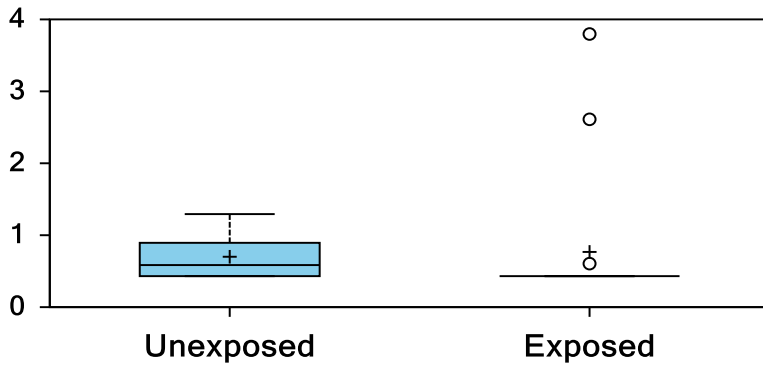

X - 15375

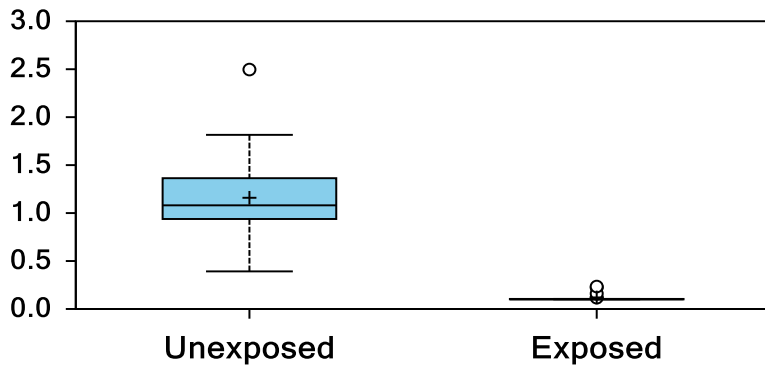

X - 15472

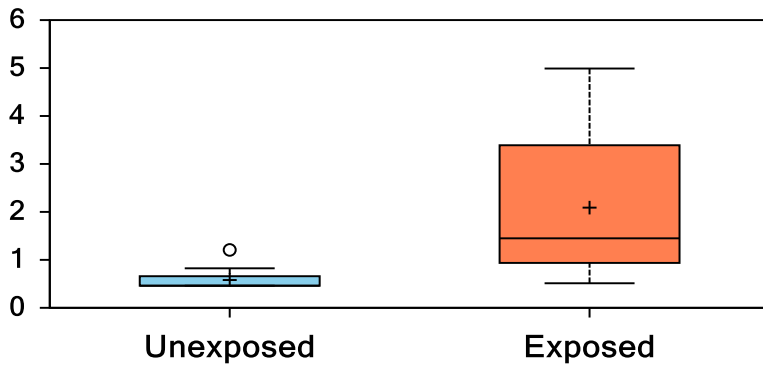

X - 15486

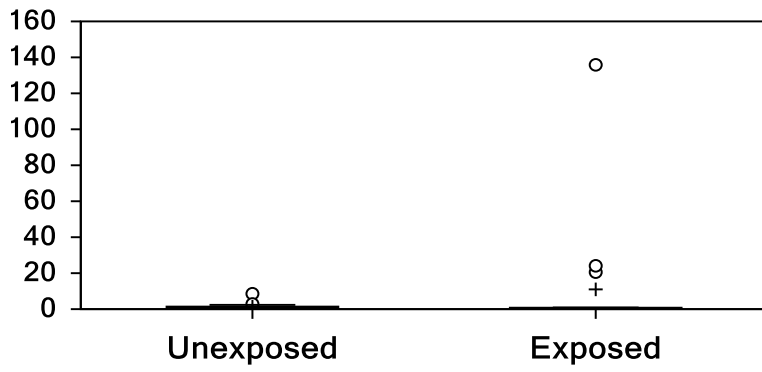

X - 15558

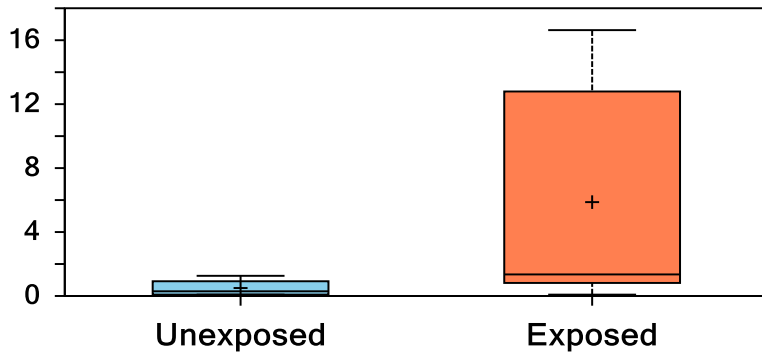

X - 15563

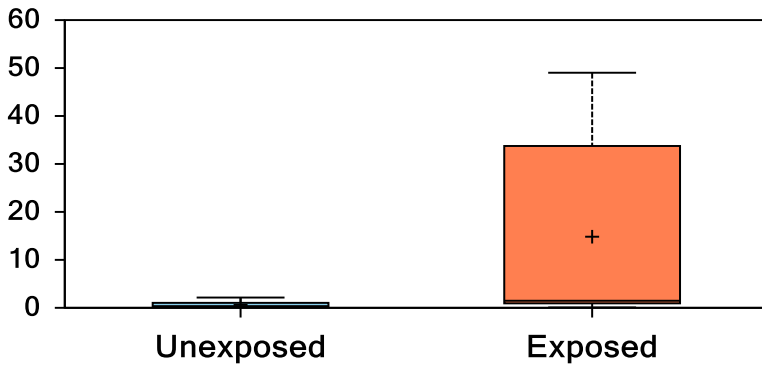

X - 15636

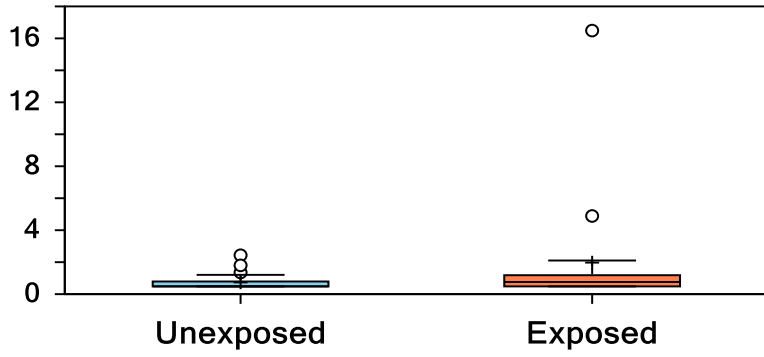

X - 15667

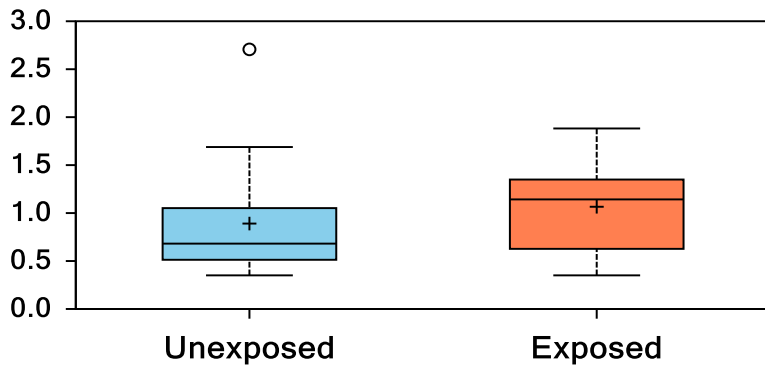

X - 15689

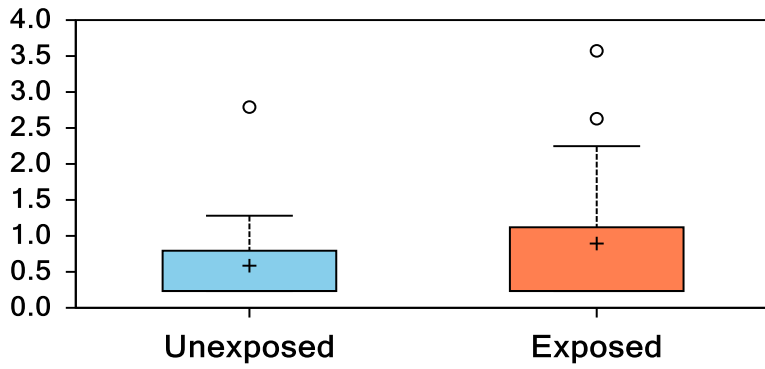

X - 15720

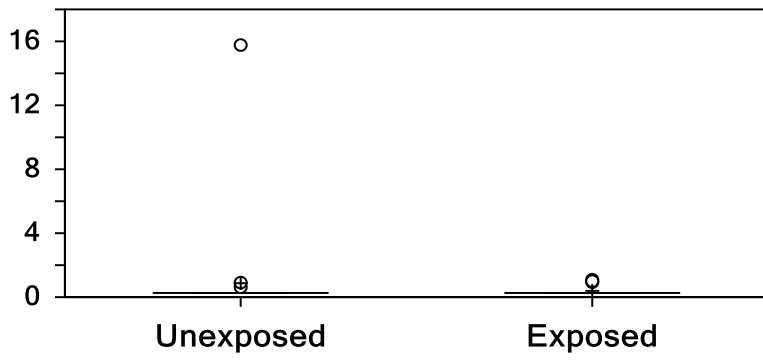

X - 15735

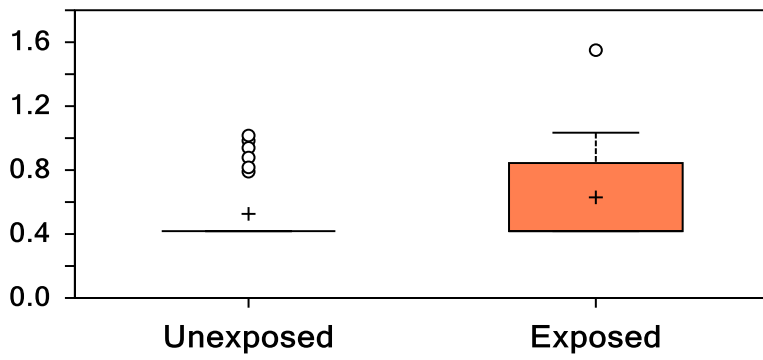

X - 15808

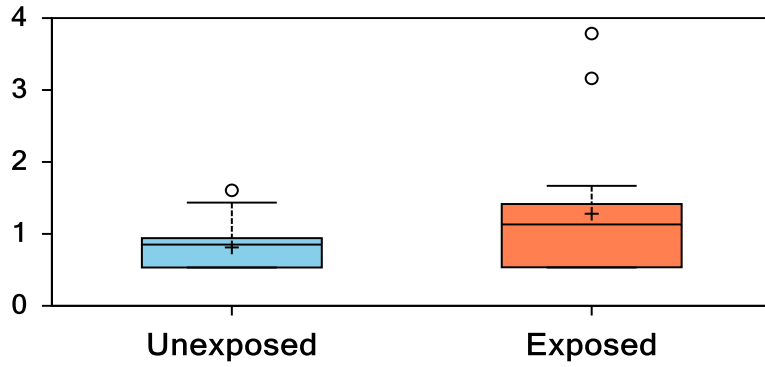

X - 15863

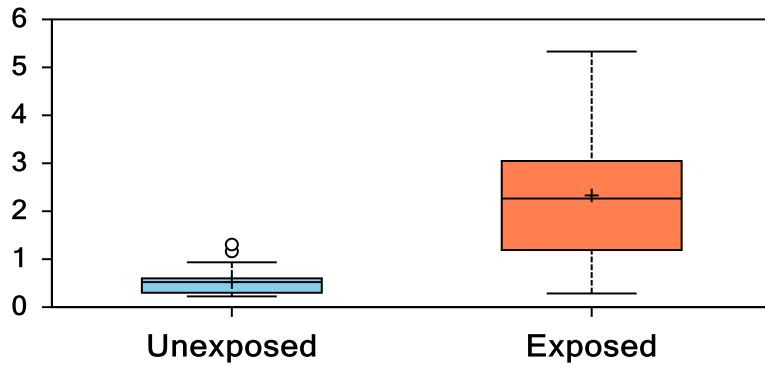

X - 16071

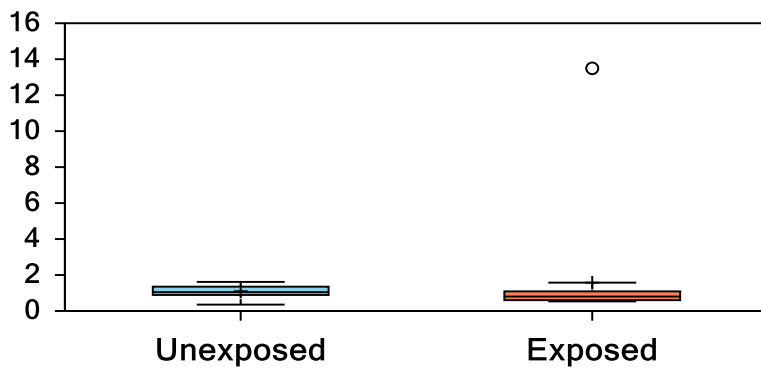

X - 16089

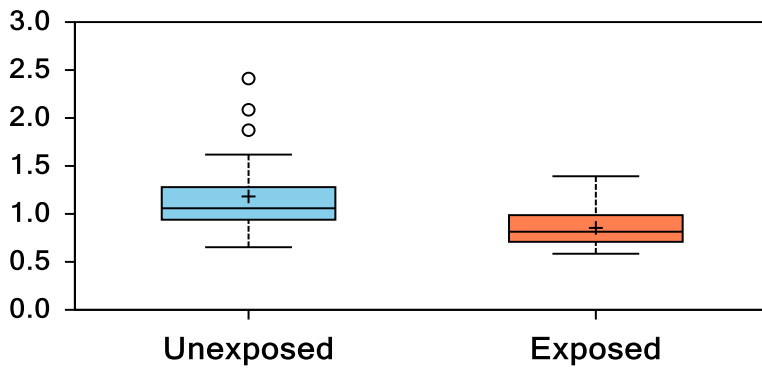

X - 16121

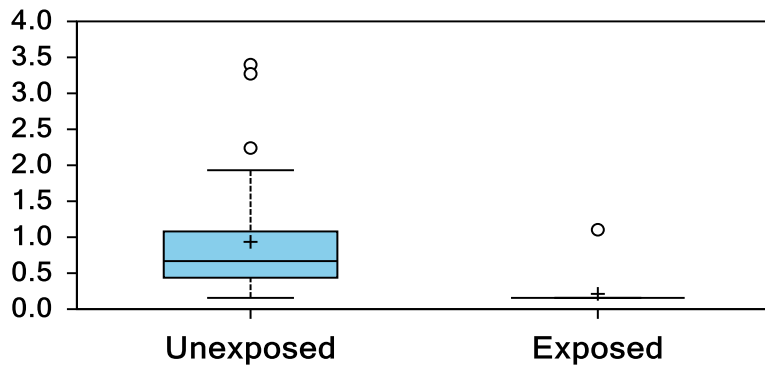

X - 16125

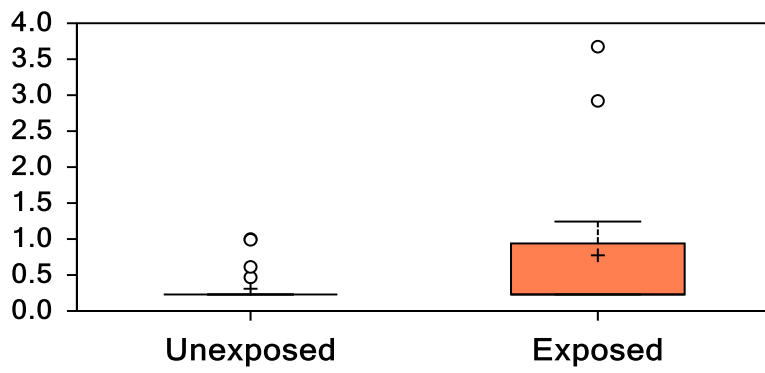

X - 16130

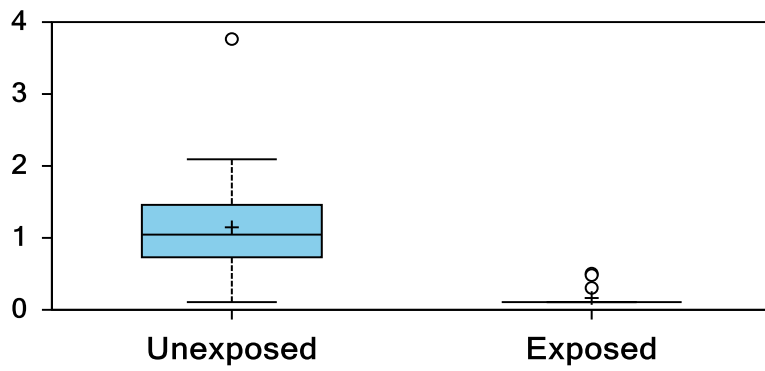



X - 16133

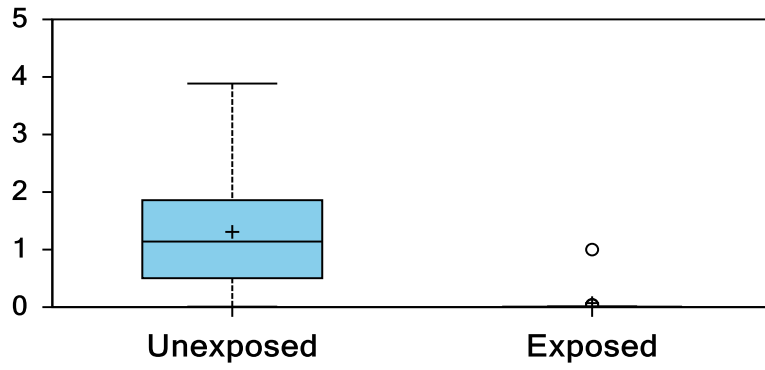

X - 16136

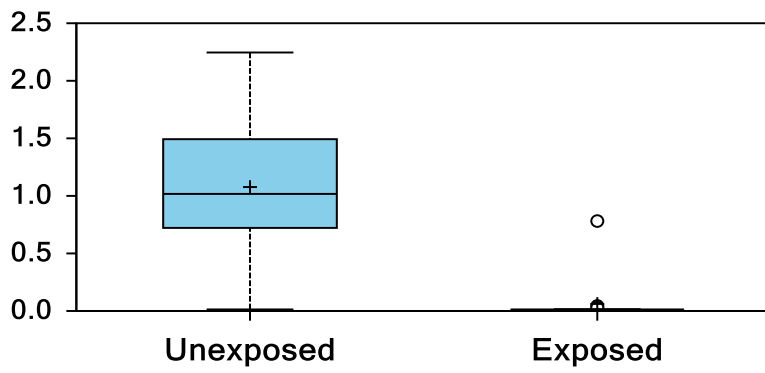

X - 16207

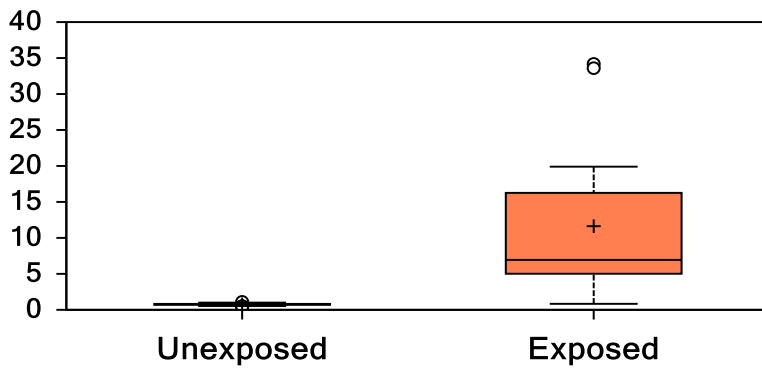

X - 16288

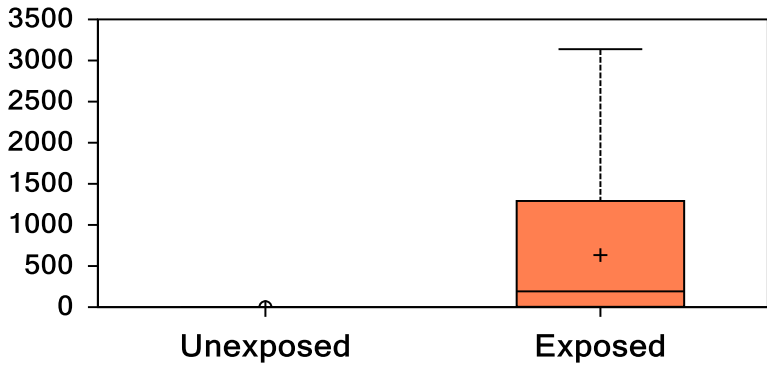

X - 16300

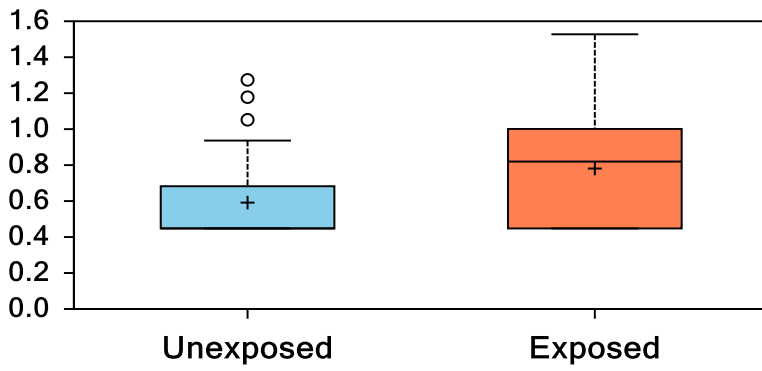

X - 16391

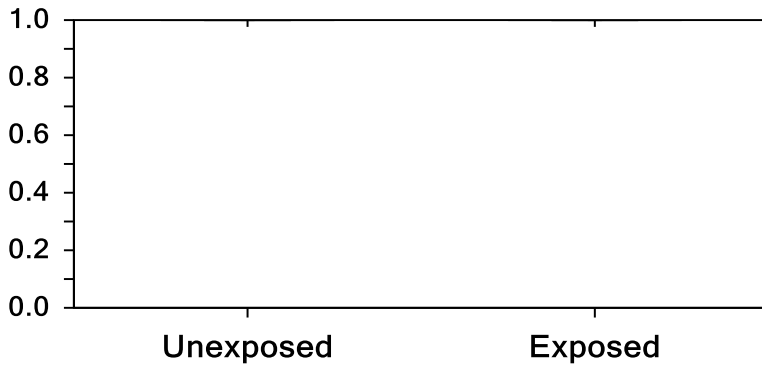

X - 16439

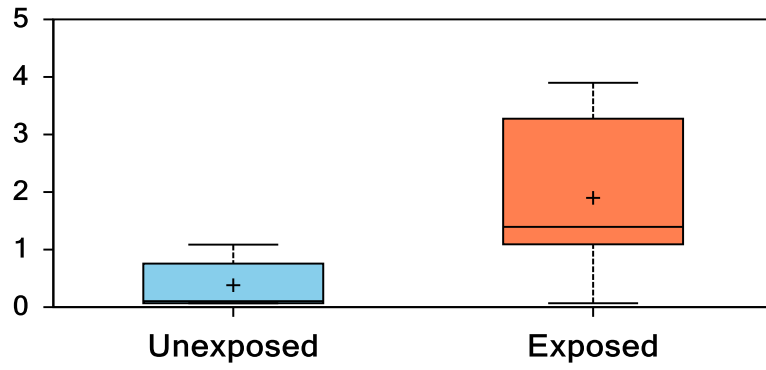

X - 16448

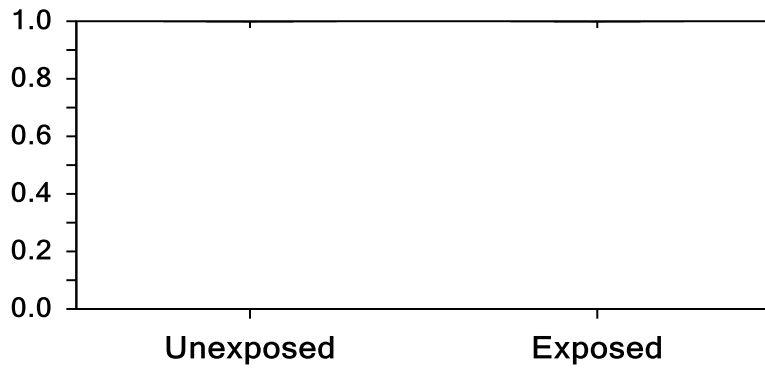

X - 16468

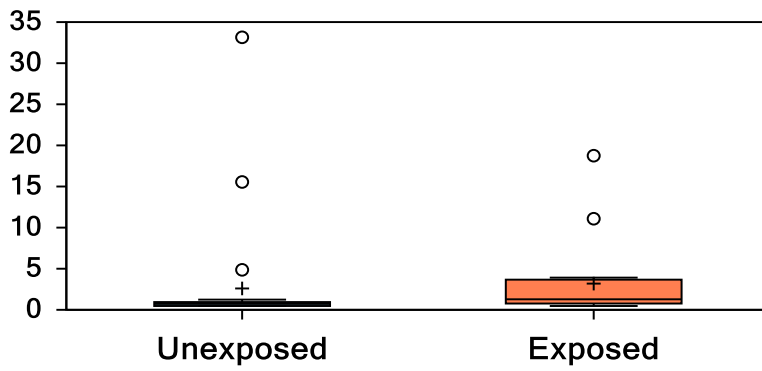

X - 16567

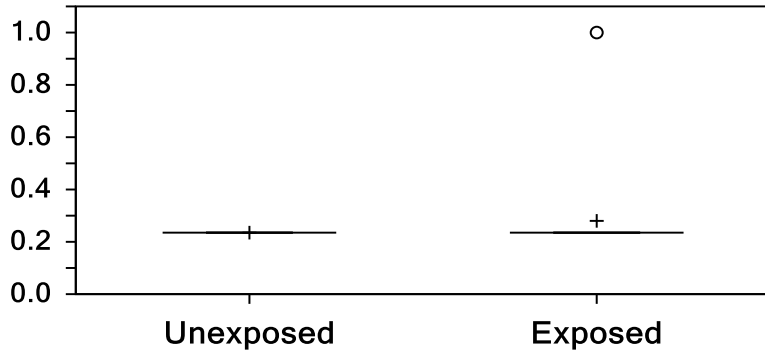

X - 16578

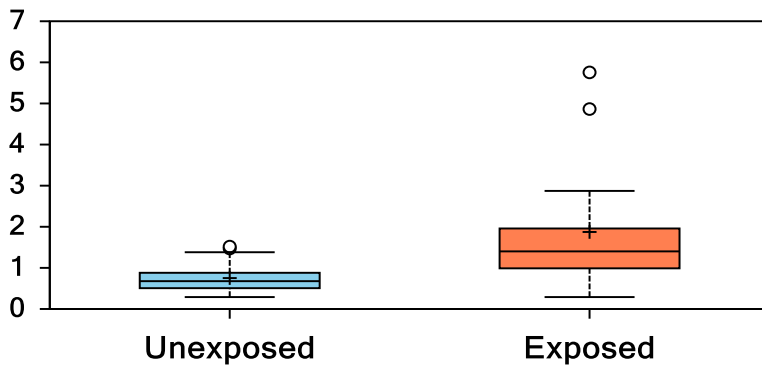

X - 16649

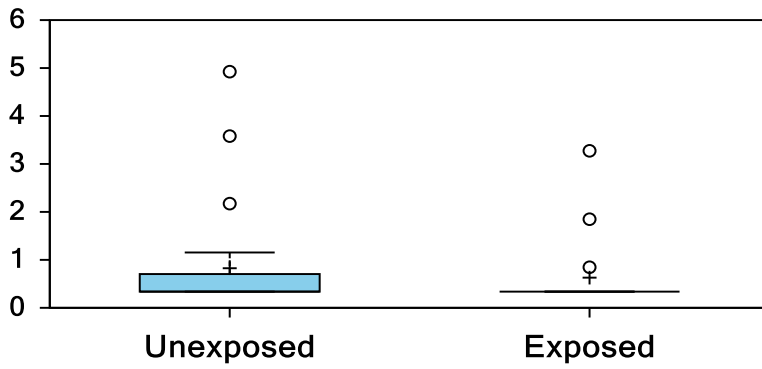

X - 16654

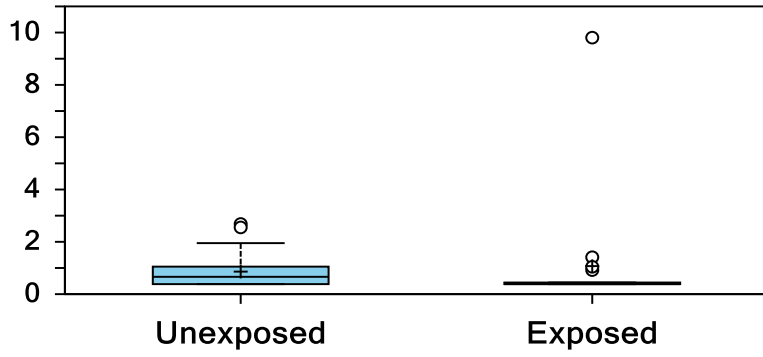

X - 16869

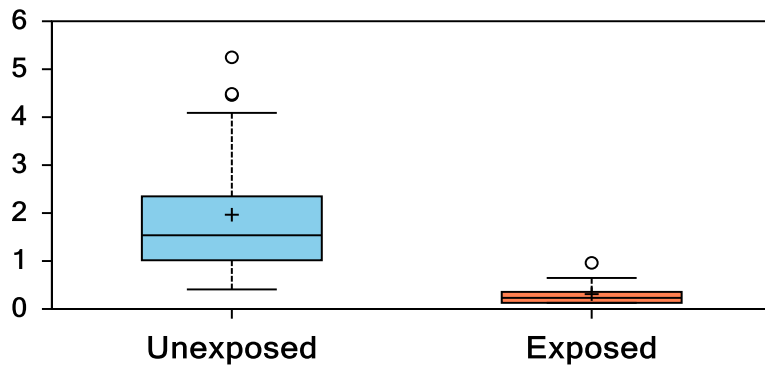

X - 16934

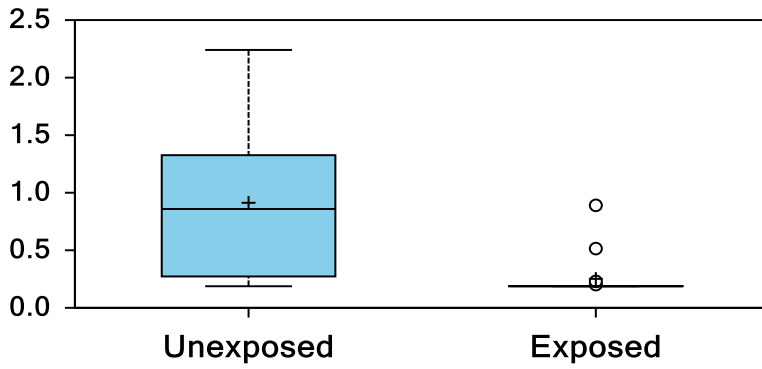

X - 16940

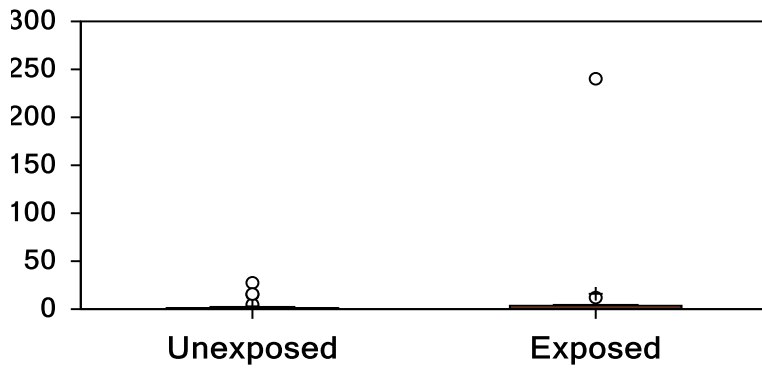

X - 16945

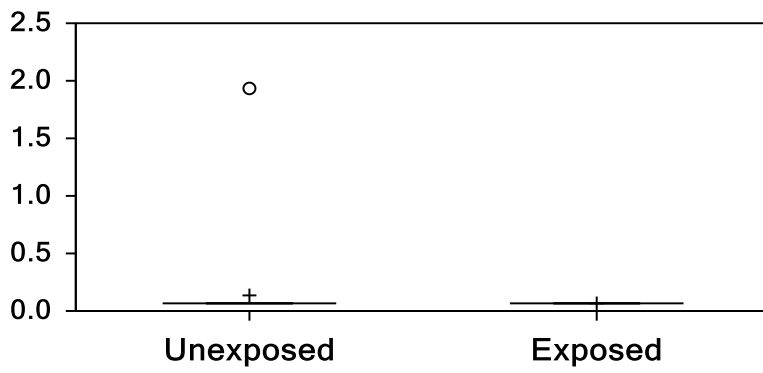

X - 16975

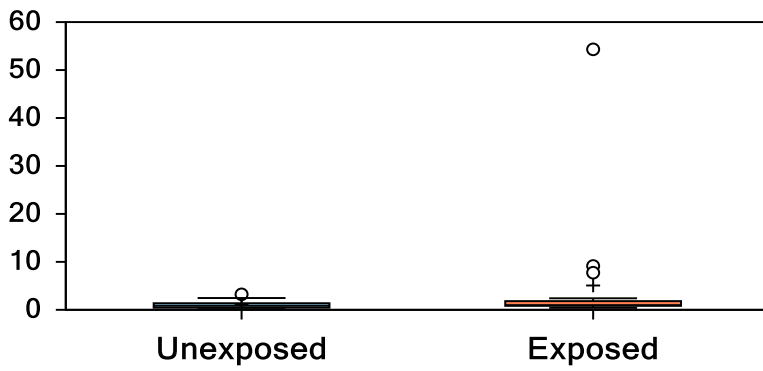

X - 17021

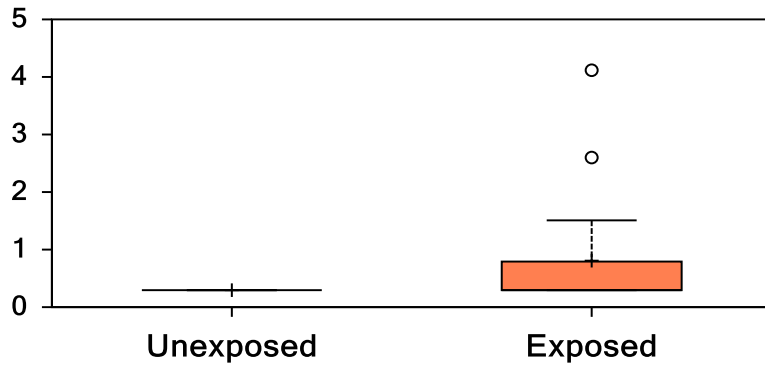

X - 17115

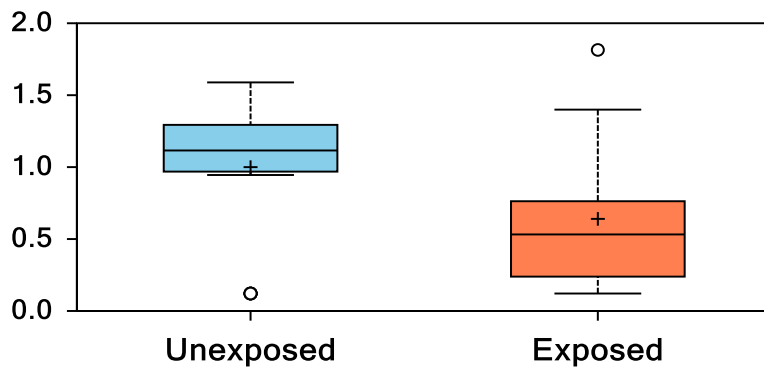

X - 17145

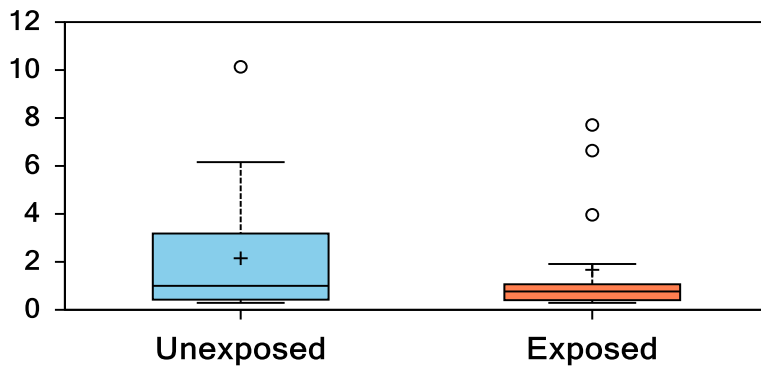

X - 17150

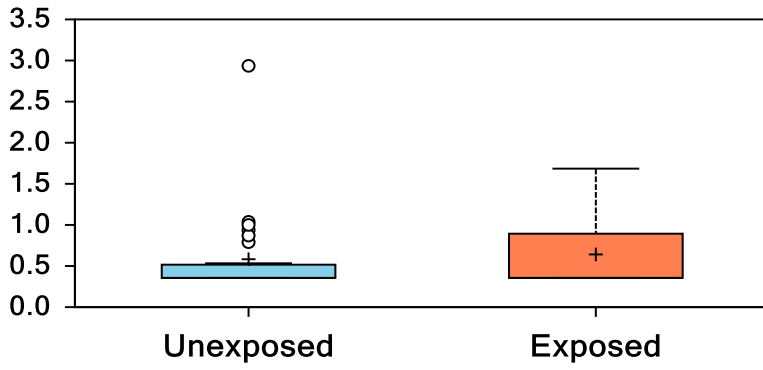

X - 17162

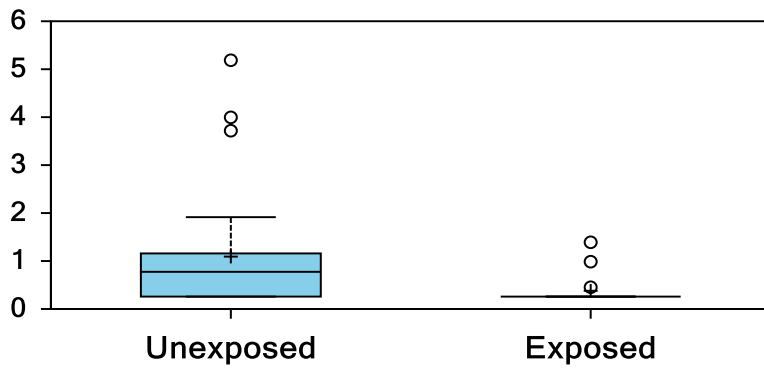

X - 17183

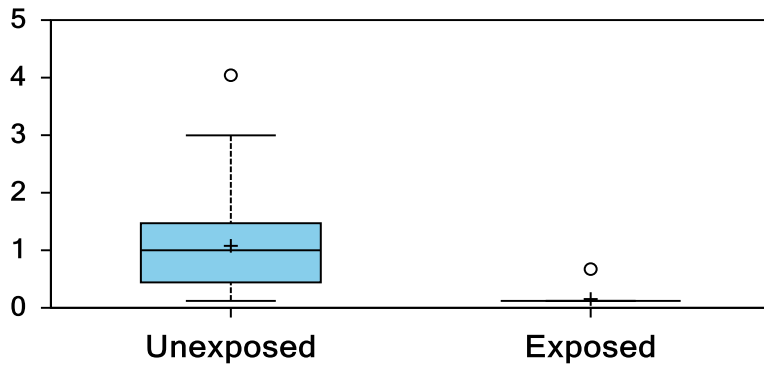



X - 17189

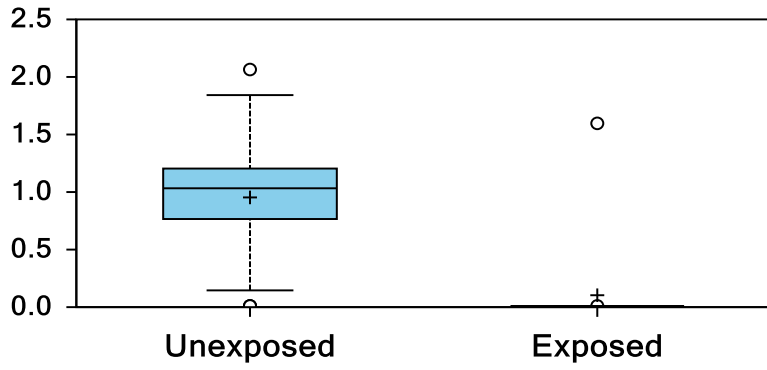

X - 17269

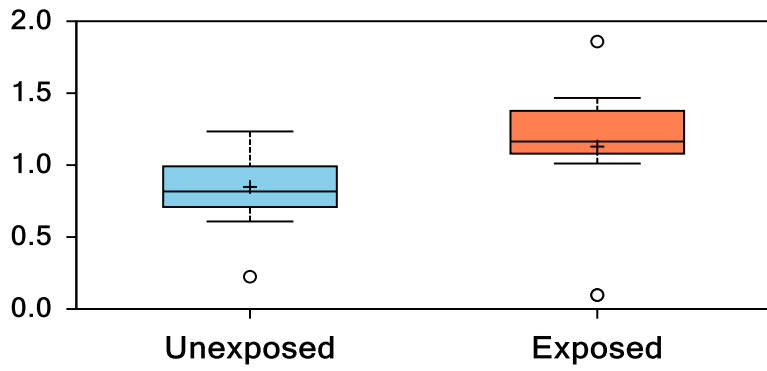

X - 17303

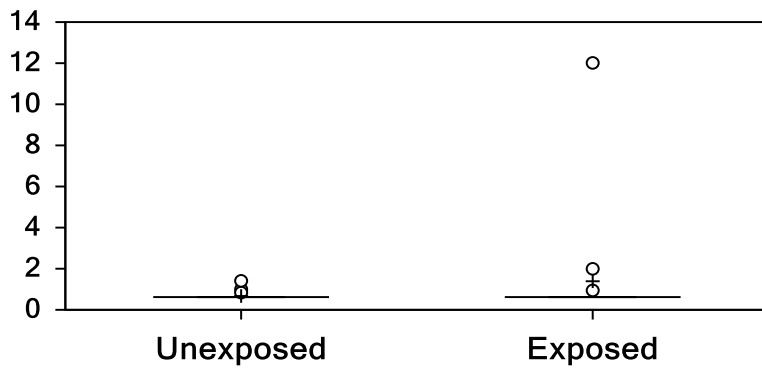

X - 17310

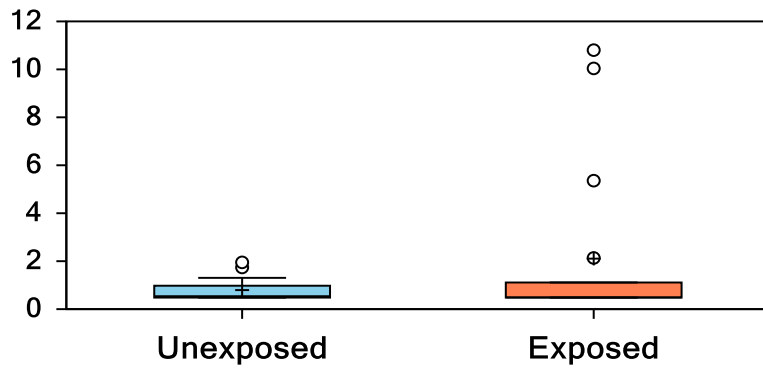

X - 17317

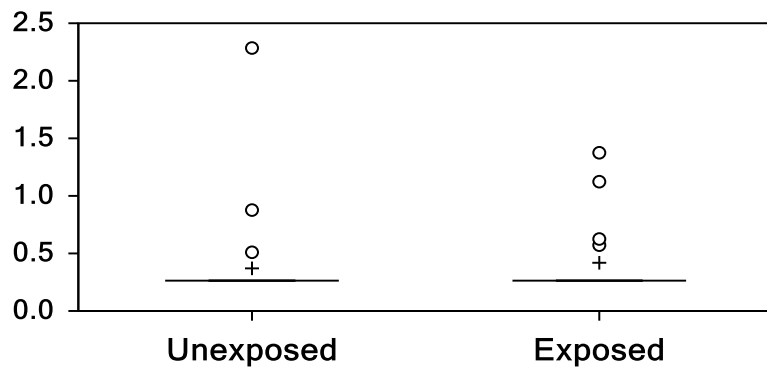

X - 17324

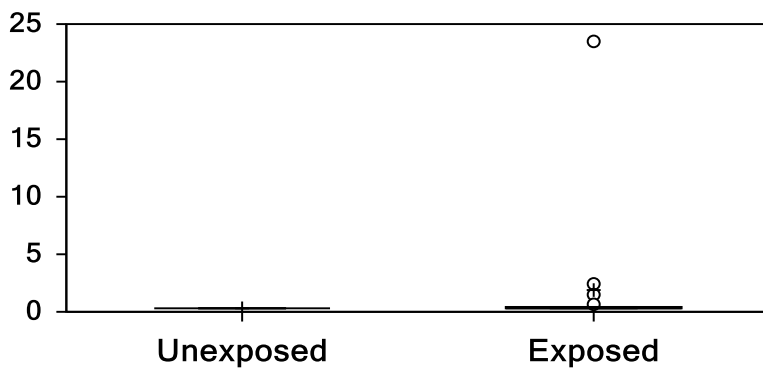

X - 17327

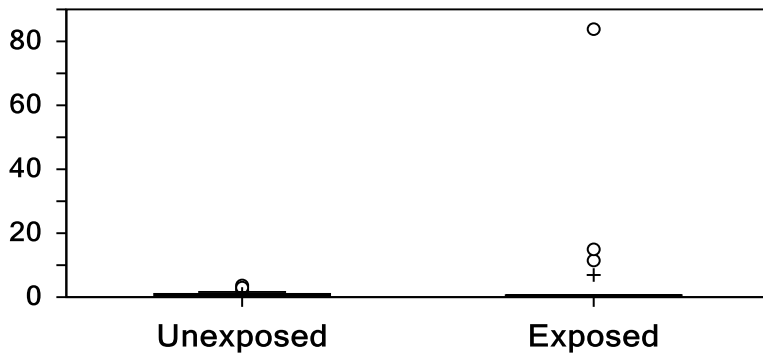

X - 17334

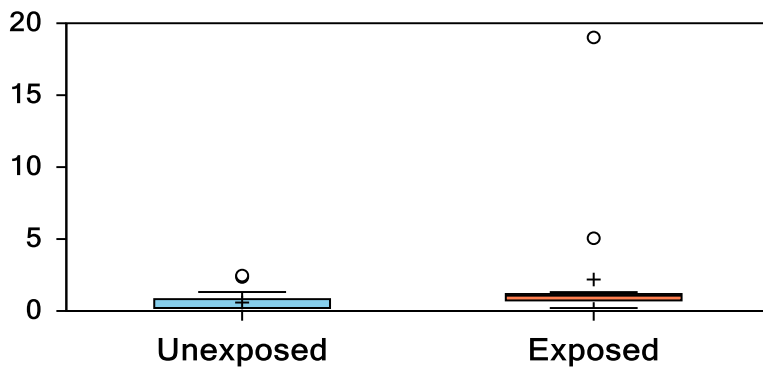

X - 17337

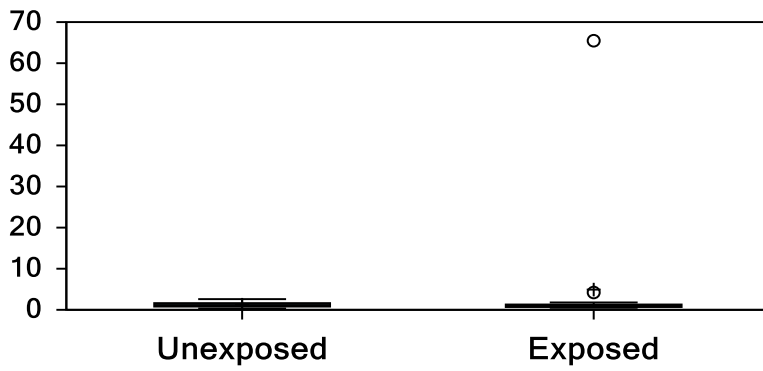

X - 17341

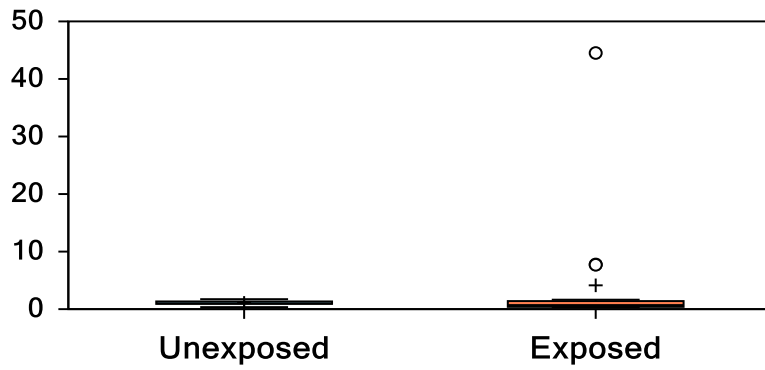

X - 17349

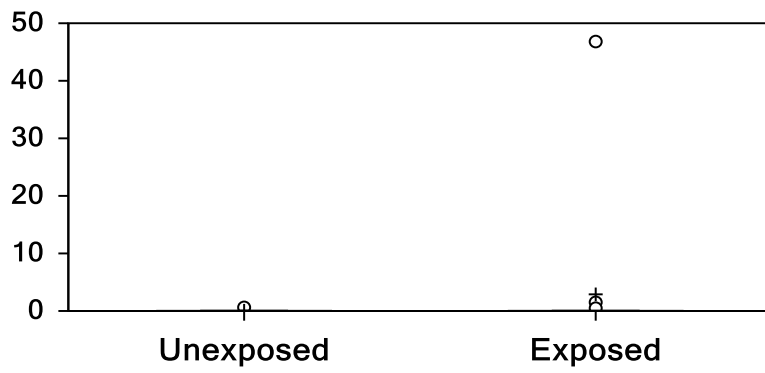

X - 17352

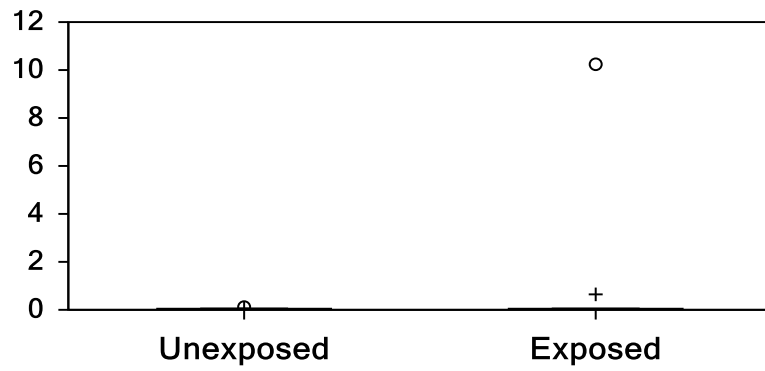

X - 17358

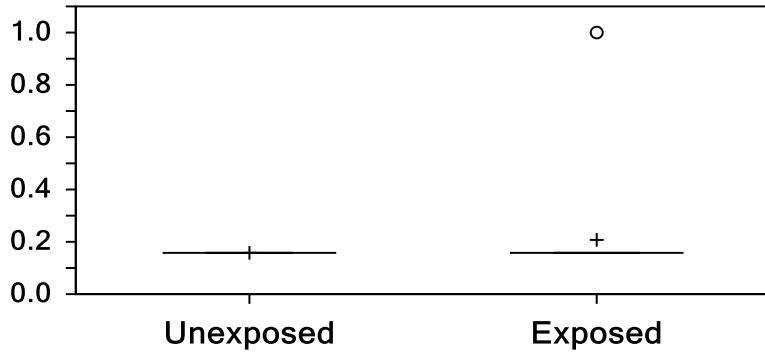

X - 17367

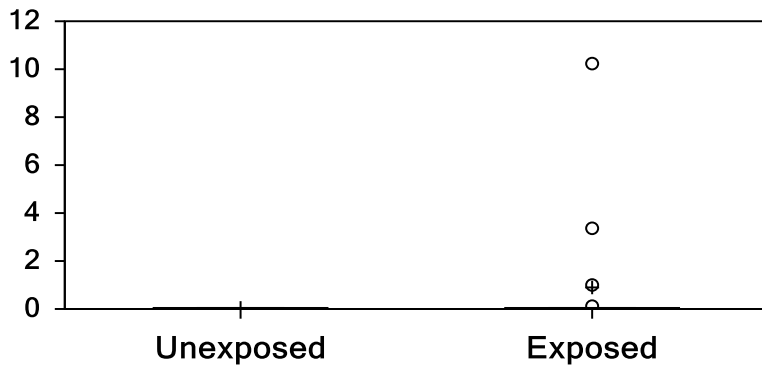

X - 17441

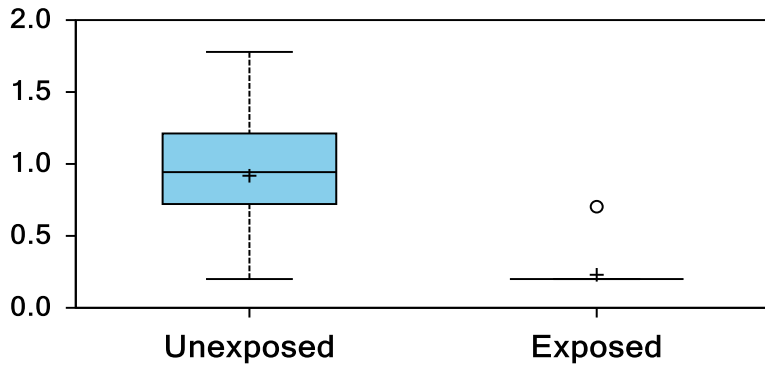

X - 17453

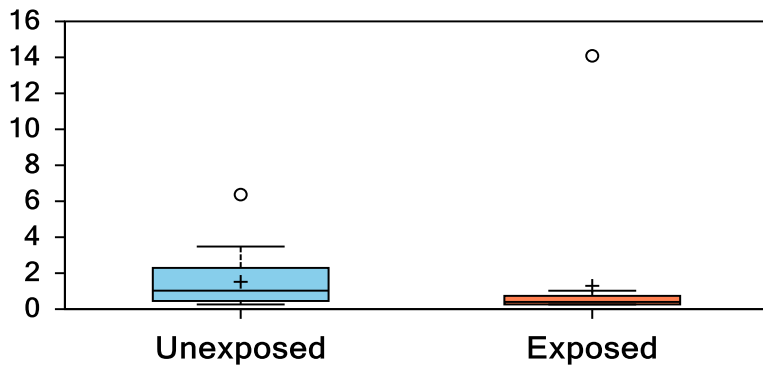

X - 17462



X - 17531

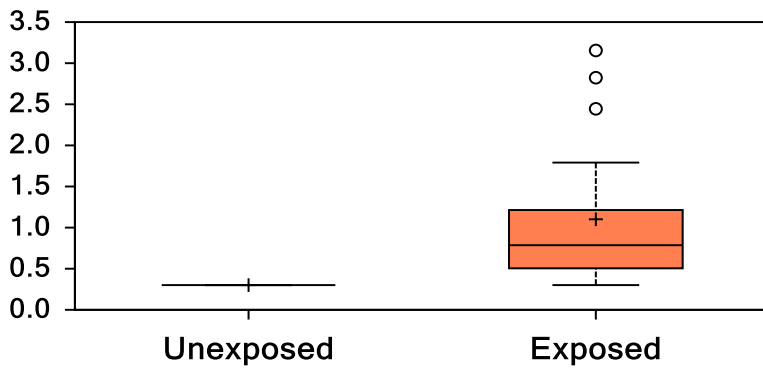

X - 17629

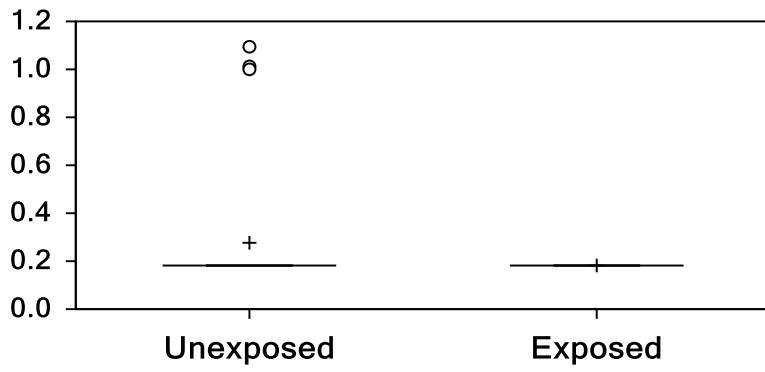

X - 17655

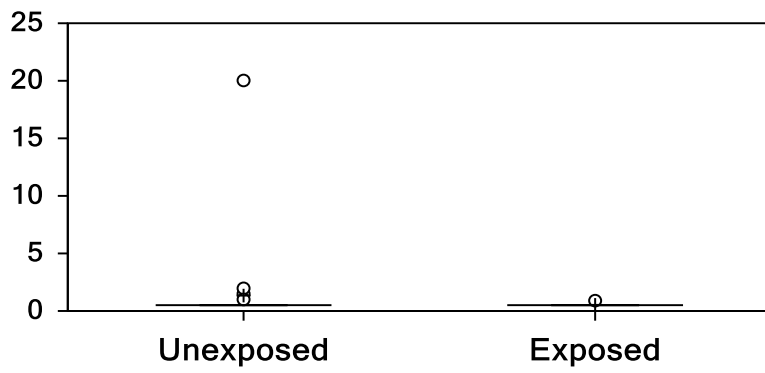

X - 17685

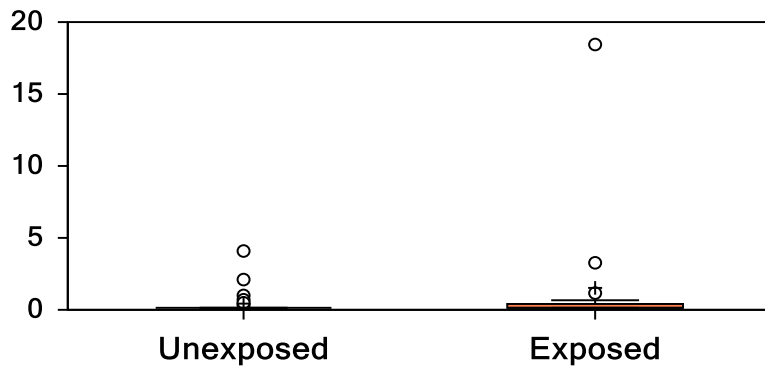

X - 17690

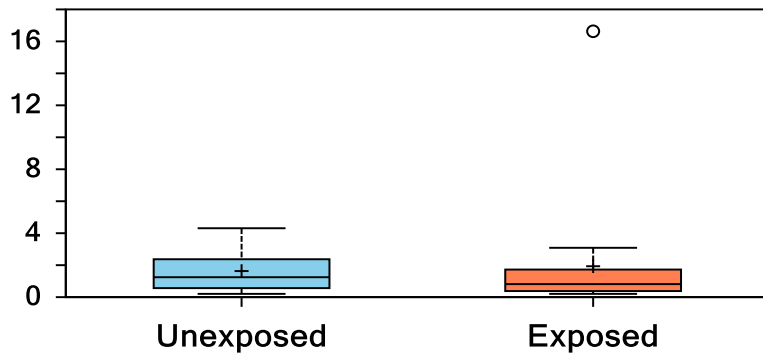

X - 17703

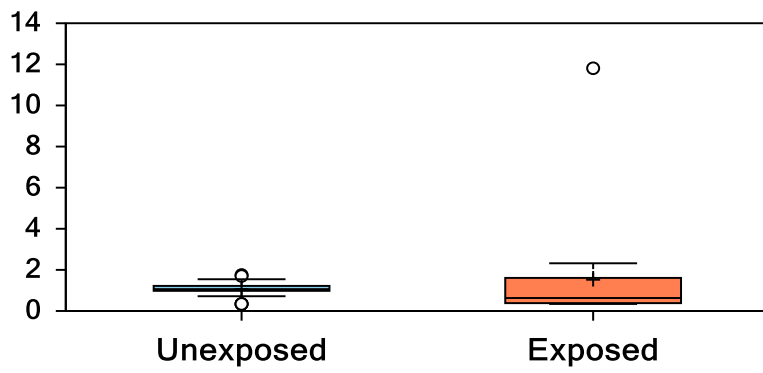

X - 17711

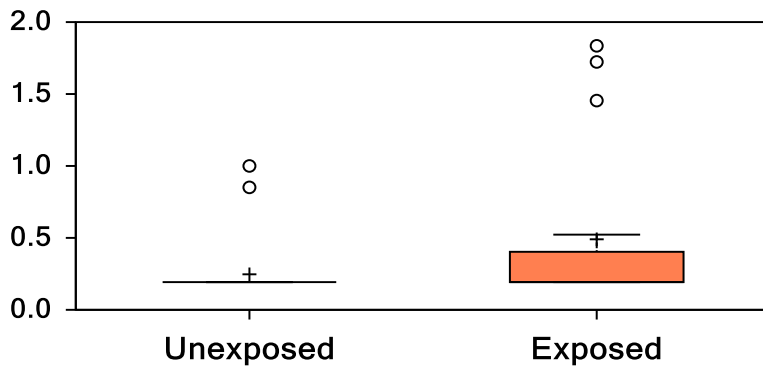



X - 17733

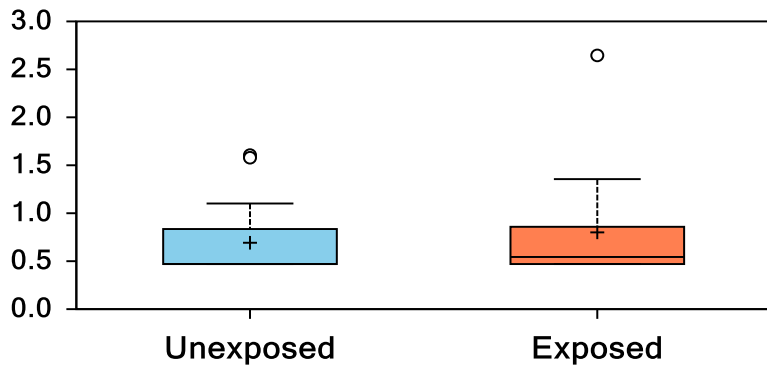

X - 17801

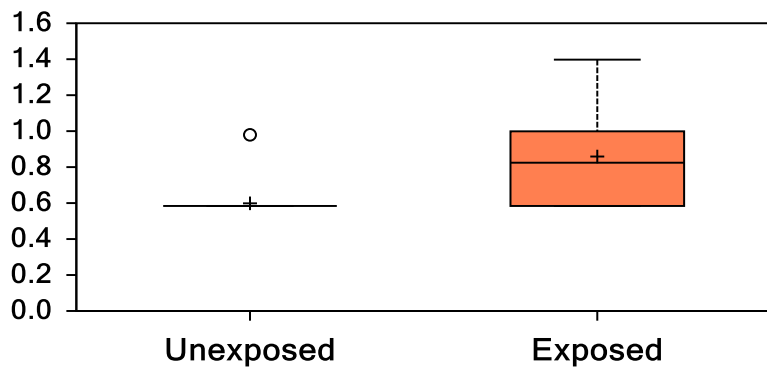

X - 17869

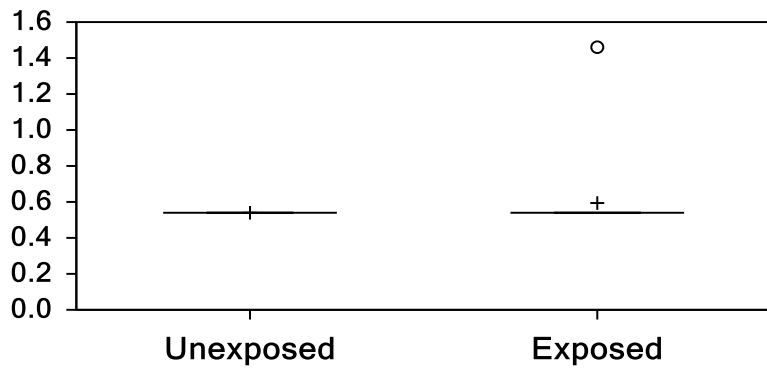

X - 18039

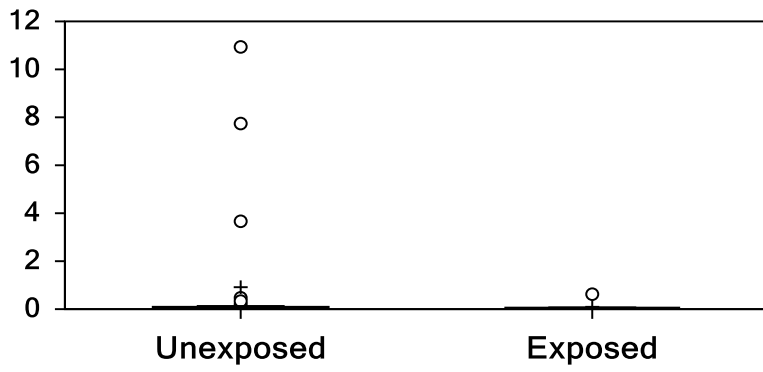

X - 18155

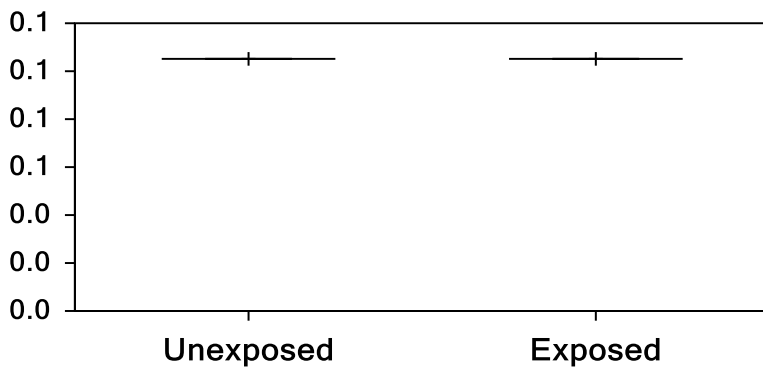

X - 18241

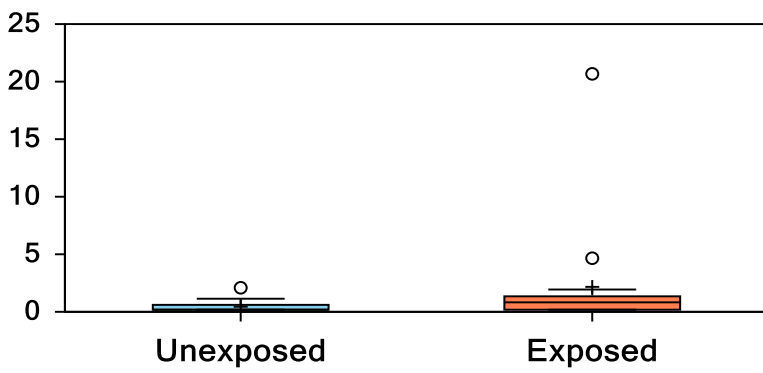

### xanthosine

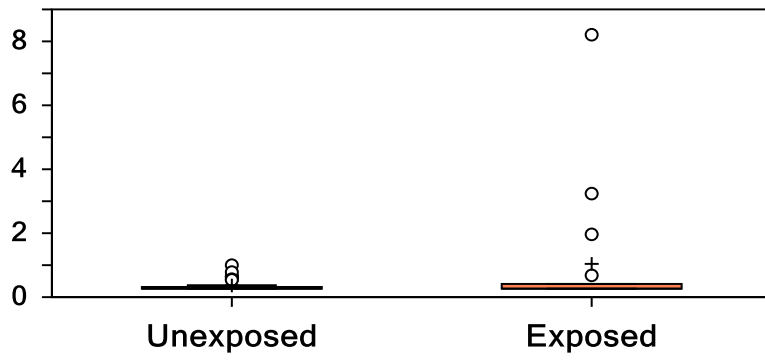

### xylitol

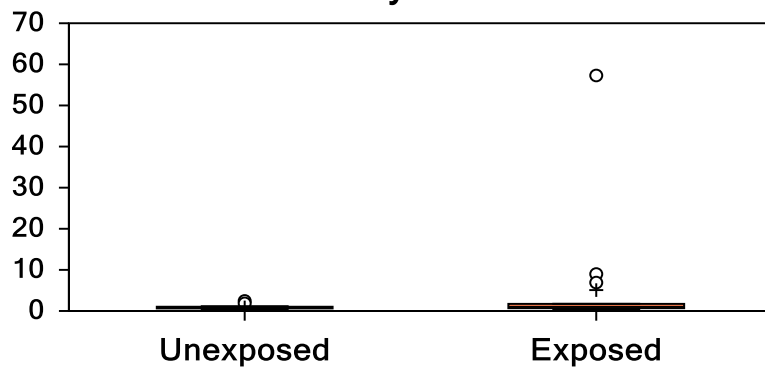

Supplement: NIHMS921606-supplement-SupplementalFigure3.pdf [file NIHMS921606-supplement-SupplementalFigure3.pdf]
